# Supplementary material
Source: MDPI journal article supplement (https://www.mdpi.com/2304-6740/12/5/131)

## checkCIF/PLATON report

Structure factors have been supplied for datablock(s) gm7\_23\_a\_sq

THIS REPORT IS FOR GUIDANCE ONLY. IF USED AS PART OF A REVIEW PROCEDURE FOR PUBLICATION, IT SHOULD NOT REPLACE THE EXPERTISE OF AN EXPERIENCED CRYSTALLOGRAPHIC REFEREE.

No syntax errors found.      CIF dictionary      Interpreting this report

### Datablock: gm7\_23\_a\_sq

---

Bond precision:      C-C = 0.0094 Å      Wavelength=0.71073

Cell:                      a=19.328(4)      b=19.328(4)      c=32.247(6)  
                                alpha=90      beta=90      gamma=120

Temperature:              293 K

|                        | Calculated                        | Reported              |
|------------------------|-----------------------------------|-----------------------|
| Volume                 | 10433(5)                          | 10433(5)              |
| Space group            | P 31 2 1                          | P 31 2 1              |
| Hall group             | P 31 2 "                          | P 31 2 "              |
| Moiety formula         | C72 H66 Ag N4 O P2 [+<br>solvent] | ?                     |
| Sum formula            | C72 H66 Ag N4 O P2 [+<br>solvent] | C72 H66 Ag F0 N4 O P2 |
| Mr                     | 1173.10                           | 1173.10               |
| Dx, g cm <sup>-3</sup> | 1.120                             | 1.120                 |
| Z                      | 6                                 | 6                     |
| Mu (mm <sup>-1</sup> ) | 0.377                             | 0.377                 |
| F000                   | 3666.0                            | 3666.0                |
| F000'                  | 3662.98                           |                       |
| h, k, lmax             | 23, 23, 38                        | 22, 22, 38            |
| Nref                   | 12317[ 6746]                      | 12286                 |
| Tmin, Tmax             | 0.798, 0.860                      | 0.750, 0.860          |
| Tmin'                  | 0.798                             |                       |

Correction method= # Reported T Limits: Tmin=0.750 Tmax=0.860  
AbsCorr = MULTI-SCAN

Data completeness= 1.82/1.00      Theta(max)= 25.056

R(reflections)= 0.0366( 11128)

wR2(reflections)=  
0.0864( 12286)

S = 1.079

Npar= 743

---

The following ALERTS were generated. Each ALERT has the format  
**test-name\_ALERT\_alert-type\_alert-level.**  
Click on the hyperlinks for more details of the test.

---

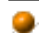

#### Alert level B

PLAT220\_ALERT\_2\_B NonSolvent Resd 1 C Ueq(max)/Ueq(min) Range 7.2 Ratio

**Author Response: This alert is generated because there is a significant amount of disorder in the structure.**

PLAT232\_ALERT\_2\_B Hirshfeld Test Diff (M-X) Ag1 --P1 . 13.2 s.u.

**Author Response: The assignment of the atom types is correct. The alert is probably due to the size difference between Ag and P.**

PLAT232\_ALERT\_2\_B Hirshfeld Test Diff (M-X) Ag1 --P2 . 13.5 s.u.

**Author Response: The assignment of the atom types is correct. The alert is probably due to the size difference between Ag and P.**

PLAT910\_ALERT\_3\_B Missing # of FCF Reflection(s) Below Theta(Min). 11 Note

0 1 0, -1 2 0, 0 2 0, -1 1 1, 0 1 1, -1 2 1,  
-1 1 2, 0 1 2, 0 0 3, -1 1 3, 0 1 3,

**Author Response: These reflections are affected by the beamstop.**

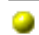

#### Alert level C

PLAT220\_ALERT\_2\_C NonSolvent Resd 1 N Ueq(max)/Ueq(min) Range 4.3 Ratio

**Author Response: This alert is generated because there is a significant amount of disorder in the structure.**

PLAT222\_ALERT\_3\_C NonSolvent Resd 1 H Uiso(max)/Uiso(min) Range 8.1 Ratio  
PLAT230\_ALERT\_2\_C Hirshfeld Test Diff for N3 --C33 . 6.4 s.u.  
PLAT234\_ALERT\_4\_C Large Hirshfeld Difference N4 --C21 . 0.16 Ang.  
PLAT234\_ALERT\_4\_C Large Hirshfeld Difference C21 --C22 . 0.17 Ang.  
PLAT234\_ALERT\_4\_C Large Hirshfeld Difference C64 --C65 . 0.19 Ang.  
PLAT234\_ALERT\_4\_C Large Hirshfeld Difference C69 --C70 . 0.16 Ang.  
PLAT241\_ALERT\_2\_C High 'MainMol' Ueq as Compared to Neighbors of 01 Check  
PLAT241\_ALERT\_2\_C High 'MainMol' Ueq as Compared to Neighbors of N3 Check

PLAT242\_ALERT\_2\_C Low 'MainMol' Ueq as Compared to Neighbors of C23 Check  
 PLAT342\_ALERT\_3\_C Low Bond Precision on C-C Bonds ..... 0.00936 Ang.  
 PLAT360\_ALERT\_2\_C Short C(sp3)-C(sp3) Bond C33 - C34 . 1.40 Ang.  
 PLAT911\_ALERT\_3\_C Missing FCF Refl Between Thmin & STh/L= 0.596 8 Report  
 0 2 1, -12 23 1, -11 23 1, 0 0 6, -16 22 6, -6 22 6,  
 -8 21 15, -3 18 21,

## Alert level G

CELLZ01\_ALERT\_1\_G Difference between formula and atom\_site contents detected.

CELLZ01\_ALERT\_1\_G ALERT: Large difference may be due to a

symmetry error - see SYMMG tests

From the CIF: \_cell\_formula\_units\_Z 6

From the CIF: \_chemical\_formula\_sum C72 H66 Ag F0 N4 O P2

TEST: Compare cell contents of formula and atom\_site data

| atom | Z*formula | cif sites | diff |
|------|-----------|-----------|------|
| C    | 432.00    | 432.00    | 0.00 |
| H    | 396.00    | 396.00    | 0.00 |
| Ag   | 6.00      | 6.00      | 0.00 |
| F    | 6.00      | 0.00      | 6.00 |
| N    | 24.00     | 24.00     | 0.00 |
| O    | 6.00      | 6.00      | 0.00 |
| P    | 12.00     | 12.00     | 0.00 |

PLAT002\_ALERT\_2\_G Number of Distance or Angle Restraints on AtSite 5 Note  
 PLAT003\_ALERT\_2\_G Number of Uiso or Uij Restrained non-H Atoms ... 9 Report  
 PLAT012\_ALERT\_1\_G N.O.K. \_shelx\_res\_checksum Found in CIF ..... Please Check  
 PLAT041\_ALERT\_1\_G Calc. and Reported SumFormula Strings Differ Please Check  
 Calc: C72 H66 Ag N4 O P2  
 Rep.: C72 H66 Ag F0 N4 O P2  
 PLAT083\_ALERT\_2\_G SHELXL Second Parameter in WGHT Unusually Large 7.07 Why ?  
 PLAT172\_ALERT\_4\_G The CIF-Embedded .res File Contains DFIX Records 2 Report  
 PLAT177\_ALERT\_4\_G The CIF-Embedded .res File Contains DELU Records 2 Report  
 PLAT178\_ALERT\_4\_G The CIF-Embedded .res File Contains SIMU Records 2 Report  
 PLAT199\_ALERT\_1\_G Reported \_cell\_measurement\_temperature ..... (K) 293 Check  
 PLAT200\_ALERT\_1\_G Reported \_diffrn\_ambient\_temperature ..... (K) 293 Check  
 PLAT301\_ALERT\_3\_G Main Residue Disorder ..... (Resd 1) 3% Note  
 PLAT410\_ALERT\_2\_G Short Intra H...H Contact H31 ..H35D . 2.01 Ang.  
 x,y,z = 1\_555 Check  
 PLAT410\_ALERT\_2\_G Short Intra H...H Contact H33B ..H35B . 1.83 Ang.  
 x,y,z = 1\_555 Check  
 PLAT412\_ALERT\_2\_G Short Intra XH3 .. XHn H34C ..H36F . 2.13 Ang.  
 x,y,z = 1\_555 Check  
 PLAT606\_ALERT\_4\_G Solvent Accessible VOID(S) in Structure ..... ! Info  
 PLAT722\_ALERT\_1\_G Angle Calc 98.00, Rep 99.20 Dev... 1.20 Degree  
 N3 -C35 -H35A 1\_555 1\_555 1\_555 # 143 Check  
 PLAT722\_ALERT\_1\_G Angle Calc 98.00, Rep 99.20 Dev... 1.20 Degree  
 N3 -C35 -H35B 1\_555 1\_555 1\_555 # 145 Check  
 PLAT722\_ALERT\_1\_G Angle Calc 111.00, Rep 109.50 Dev... 1.50 Degree  
 H36B -C36 -H36C 1\_555 1\_555 1\_555 # 152 Check  
 PLAT860\_ALERT\_3\_G Number of Least-Squares Restraints ..... 64 Note  
 PLAT869\_ALERT\_4\_G ALERTS Related to the Use of SQUEEZE Suppressed ! Info  
 PLAT883\_ALERT\_1\_G No Info/Value for \_atom\_sites\_solution\_primary . Please Do !  
 PLAT899\_ALERT\_4\_G SHELXL2018 is Deprecated and Succeeded by SHELXL 2019/3 Note  
 PLAT909\_ALERT\_3\_G Percentage of I>2sig(I) Data at Theta(Max) Still 77% Note  
 PLAT913\_ALERT\_3\_G Missing # of Very Strong Reflections in FCF .... 1 Note  
 0 0 6,

PLAT969\_ALERT\_5\_G The 'Henn et al.' R-Factor-gap value ..... 3.93 Note  
 Predicted wR2: Based on SigI\*\*2 2.20 or SHELX Weight 8.29  
 PLAT978\_ALERT\_2\_G Number C-C Bonds with Positive Residual Density. 0 Info

---

0 **ALERT level A** = Most likely a serious problem - resolve or explain  
 4 **ALERT level B** = A potentially serious problem, consider carefully  
 13 **ALERT level C** = Check. Ensure it is not caused by an omission or oversight  
 28 **ALERT level G** = General information/check it is not something unexpected

10 ALERT type 1 CIF construction/syntax error, inconsistent or missing data  
 16 ALERT type 2 Indicator that the structure model may be wrong or deficient  
 8 ALERT type 3 Indicator that the structure quality may be low  
 10 ALERT type 4 Improvement, methodology, query or suggestion  
 1 ALERT type 5 Informative message, check

---

It is advisable to attempt to resolve as many as possible of the alerts in all categories. Often the minor alerts point to easily fixed oversights, errors and omissions in your CIF or refinement strategy, so attention to these fine details can be worthwhile. In order to resolve some of the more serious problems it may be necessary to carry out additional measurements or structure refinements. However, the purpose of your study may justify the reported deviations and the more serious of these should normally be commented upon in the discussion or experimental section of a paper or in the "special\_details" fields of the CIF. checkCIF was carefully designed to identify outliers and unusual parameters, but every test has its limitations and alerts that are not important in a particular case may appear. Conversely, the absence of alerts does not guarantee there are no aspects of the results needing attention. It is up to the individual to critically assess their own results and, if necessary, seek expert advice.

### Publication of your CIF in IUCr journals

A basic structural check has been run on your CIF. These basic checks will be run on all CIFs submitted for publication in IUCr journals (*Acta Crystallographica*, *Journal of Applied Crystallography*, *Journal of Synchrotron Radiation*); however, if you intend to submit to *Acta Crystallographica Section C* or *E* or *IUCrData*, you should make sure that full publication checks are run on the final version of your CIF prior to submission.

### Publication of your CIF in other journals

Please refer to the *Notes for Authors* of the relevant journal for any special instructions relating to CIF submission.

Datablock gm7\_23\_a\_sq - ellipsoid plot

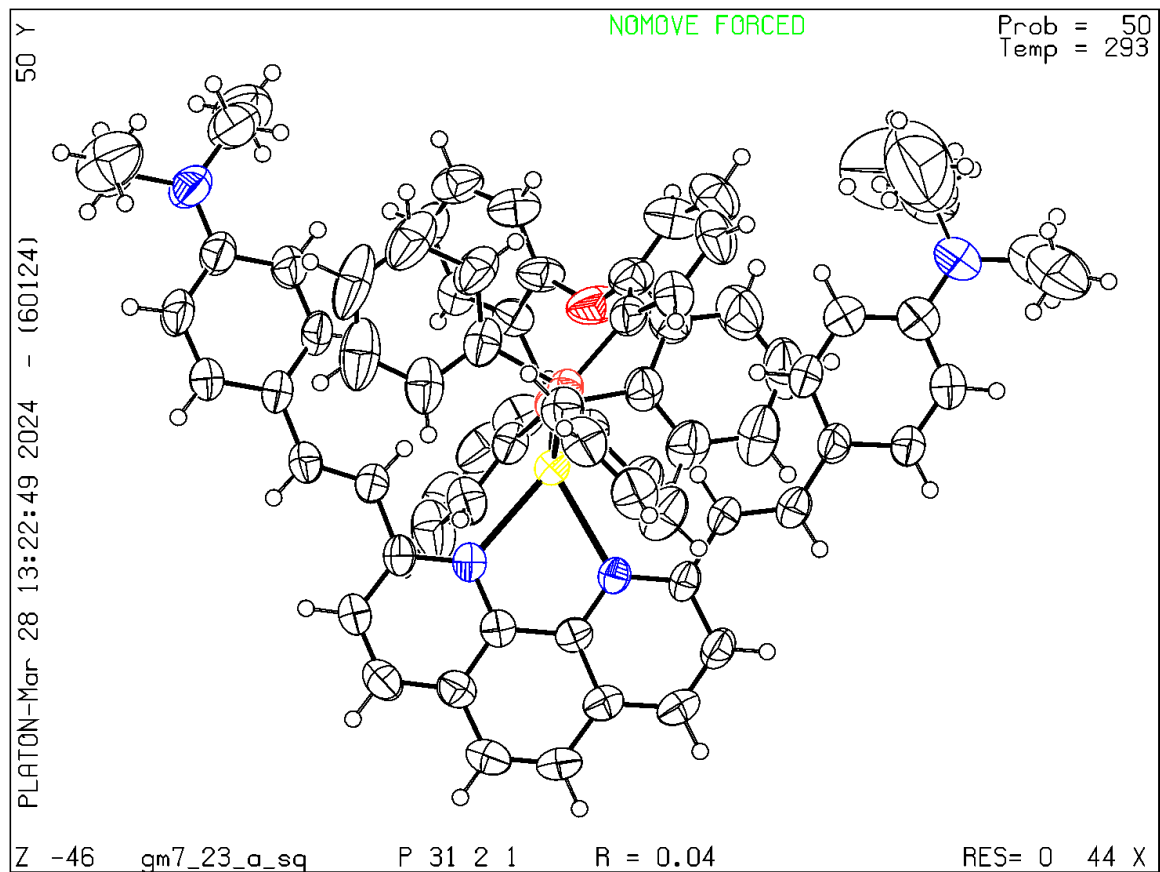

Supplement: s1 [file s1]
