# Supplementary material
Source: MDPI journal article supplement (https://www.mdpi.com/2304-6740/12/5/131)

## checkCIF/PLATON report

Structure factors have been supplied for datablock(s) GM31\_23\_0m\_a

THIS REPORT IS FOR GUIDANCE ONLY. IF USED AS PART OF A REVIEW PROCEDURE FOR PUBLICATION, IT SHOULD NOT REPLACE THE EXPERTISE OF AN EXPERIENCED CRYSTALLOGRAPHIC REFEREE.

No syntax errors found.      CIF dictionary      Interpreting this report

### Datablock: GM31\_23\_0m\_a

---

|                 |                               |                            |               |
|-----------------|-------------------------------|----------------------------|---------------|
| Bond precision: | C-C = 0.0078 A                | Wavelength=0.71073         |               |
| Cell:           | a=14.2376(12)                 | b=20.6038(17)              | c=20.3351(16) |
|                 | alpha=90                      | beta=104.476(3)            | gamma=90      |
| Temperature:    | 296 K                         |                            |               |
|                 | Calculated                    | Reported                   |               |
| Volume          | 5775.9(8)                     | 5775.9(8)                  |               |
| Space group     | P 21/c                        | P 21/c                     |               |
| Hall group      | -P 2ybc                       | -P 2ybc                    |               |
| Moiety formula  | C66 H52 Ag N2 O P2 S2, B F4 ? |                            |               |
| Sum formula     | C66 H52 Ag B F4 N2 O P2 S2    | C66 H52 Ag B F4 N2 O P2 S2 |               |
| Mr              | 1209.84                       | 1209.83                    |               |
| Dx, g cm-3      | 1.391                         | 1.391                      |               |
| Z               | 4                             | 4                          |               |
| Mu (mm-1)       | 0.535                         | 0.535                      |               |
| F000            | 2480.0                        | 2480.0                     |               |
| F000'           | 2479.18                       |                            |               |
| h,k,lmax        | 16,24,24                      | 16,24,24                   |               |
| Nref            | 10170                         | 10152                      |               |
| Tmin,Tmax       | 0.950,0.968                   | 0.617,0.746                |               |
| Tmin'           | 0.852                         |                            |               |

Correction method= # Reported T Limits: Tmin=0.617 Tmax=0.746  
AbsCorr = MULTI-SCAN

Data completeness= 0.998      Theta(max)= 24.998

|                               |                                  |
|-------------------------------|----------------------------------|
| R(reflections)= 0.0649( 7846) | wR2(reflections)= 0.1143( 10152) |
| S = 1.171                     | Npar= 714                        |

---

The following ALERTS were generated. Each ALERT has the format

**test-name\_ALERT\_alert-type\_alert-level.**

Click on the hyperlinks for more details of the test.

---

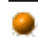

#### Alert level B

PLAT232\_ALERT\_2\_B Hirshfeld Test Diff (M-X) Agl --P1 . 10.6 s.u.

**Author Response: The assignment of the atom types is correct. The alert is probably due to the size difference between Ag and P.**

PLAT232\_ALERT\_2\_B Hirshfeld Test Diff (M-X) Agl --P2 . 11.0 s.u.

**Author Response: The assignment of the atom types is correct. The alert is probably due to the size difference between Ag and P.**

---

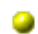

#### Alert level C

RINTA01\_ALERT\_3\_C The value of Rint is greater than 0.12

Rint given 0.127

PLAT220\_ALERT\_2\_C NonSolvent Resd 1 C Ueq(max)/Ueq(min) Range 5.0 Ratio  
PLAT222\_ALERT\_3\_C NonSolvent Resd 1 H Uiso(max)/Uiso(min) Range 4.9 Ratio  
PLAT234\_ALERT\_4\_C Large Hirshfeld Difference S1 --C21 . 0.17 Ang.  
PLAT241\_ALERT\_2\_C High 'MainMol' Ueq as Compared to Neighbors of S2 Check  
PLAT241\_ALERT\_2\_C High 'MainMol' Ueq as Compared to Neighbors of O1 Check  
PLAT242\_ALERT\_2\_C Low 'MainMol' Ueq as Compared to Neighbors of C18 Check  
PLAT242\_ALERT\_2\_C Low 'MainMol' Ueq as Compared to Neighbors of C27 Check  
PLAT260\_ALERT\_2\_C Large Average Ueq of Residue Including F1 0.112 Check  
PLAT906\_ALERT\_3\_C Large K Value in the Analysis of Variance ..... 20.679 Check  
PLAT906\_ALERT\_3\_C Large K Value in the Analysis of Variance ..... 2.988 Check  
PLAT910\_ALERT\_3\_C Missing # of FCF Reflection(s) Below Theta(Min). 10 Note  
1 0 0, 1 1 0, 0 2 0, -1 1 1, 0 1 1, 1 1 1,  
0 2 1, -1 0 2, 0 0 2, 0 1 2,  
PLAT911\_ALERT\_3\_C Missing FCF Refl Between Thmin & STh/L= 0.595 8 Report  
-2 0 2, -11 4 20, -11 5 20, 2 0 22, -8 1 23, -8 2 23,  
-3 0 24, -6 1 24,

---

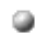

#### Alert level G

PLAT020\_ALERT\_3\_G The Value of Rint is Greater Than 0.12 ..... 0.127 Report  
PLAT083\_ALERT\_2\_G SHELXL Second Parameter in WGHT Unusually Large 10.28 Why ?  
PLAT244\_ALERT\_4\_G Low 'Solvent' Ueq as Compared to Neighbors of B1 Check  
PLAT883\_ALERT\_1\_G No Info/Value for \_atom\_sites\_solution\_primary . Please Do !  
PLAT899\_ALERT\_4\_G SHELXL2018 is Deprecated and Succeeded by SHELXL 2019/3 Note  
PLAT909\_ALERT\_3\_G Percentage of I>2sig(I) Data at Theta(Max) Still 65% Note  
PLAT933\_ALERT\_2\_G Number of HKL-OMIT Records in Embedded .res File 6 Note  
0 2 1, -8 1 23, 0 1 2, -6 1 24, -2 0 2, -8 2 23,  
PLAT961\_ALERT\_5\_G Dataset Contains no Negative Intensities ..... Please Check  
PLAT967\_ALERT\_5\_G Note: Two-Theta Cutoff Value in Embedded .res .. 50.0 Degree  
PLAT969\_ALERT\_5\_G The 'Henn et al.' R-Factor-gap value ..... 3.48 Note  
Predicted wR2: Based on SigI\*\*2 3.29 or SHELX Weight 10.12

---

0 **ALERT level A** = Most likely a serious problem - resolve or explain  
2 **ALERT level B** = A potentially serious problem, consider carefully  
13 **ALERT level C** = Check. Ensure it is not caused by an omission or oversight  
11 **ALERT level G** = General information/check it is not something unexpected

1 ALERT type 1 CIF construction/syntax error, inconsistent or missing data  
11 ALERT type 2 Indicator that the structure model may be wrong or deficient  
8 ALERT type 3 Indicator that the structure quality may be low  
3 ALERT type 4 Improvement, methodology, query or suggestion  
3 ALERT type 5 Informative message, check

---

---

It is advisable to attempt to resolve as many as possible of the alerts in all categories. Often the minor alerts point to easily fixed oversights, errors and omissions in your CIF or refinement strategy, so attention to these fine details can be worthwhile. In order to resolve some of the more serious problems it may be necessary to carry out additional measurements or structure refinements. However, the purpose of your study may justify the reported deviations and the more serious of these should normally be commented upon in the discussion or experimental section of a paper or in the "special\_details" fields of the CIF. checkCIF was carefully designed to identify outliers and unusual parameters, but every test has its limitations and alerts that are not important in a particular case may appear. Conversely, the absence of alerts does not guarantee there are no aspects of the results needing attention. It is up to the individual to critically assess their own results and, if necessary, seek expert advice.

### Publication of your CIF in IUCr journals

A basic structural check has been run on your CIF. These basic checks will be run on all CIFs submitted for publication in IUCr journals (*Acta Crystallographica*, *Journal of Applied Crystallography*, *Journal of Synchrotron Radiation*); however, if you intend to submit to *Acta Crystallographica Section C* or *E* or *IUCrData*, you should make sure that full publication checks are run on the final version of your CIF prior to submission.

### Publication of your CIF in other journals

Please refer to the *Notes for Authors* of the relevant journal for any special instructions relating to CIF submission.

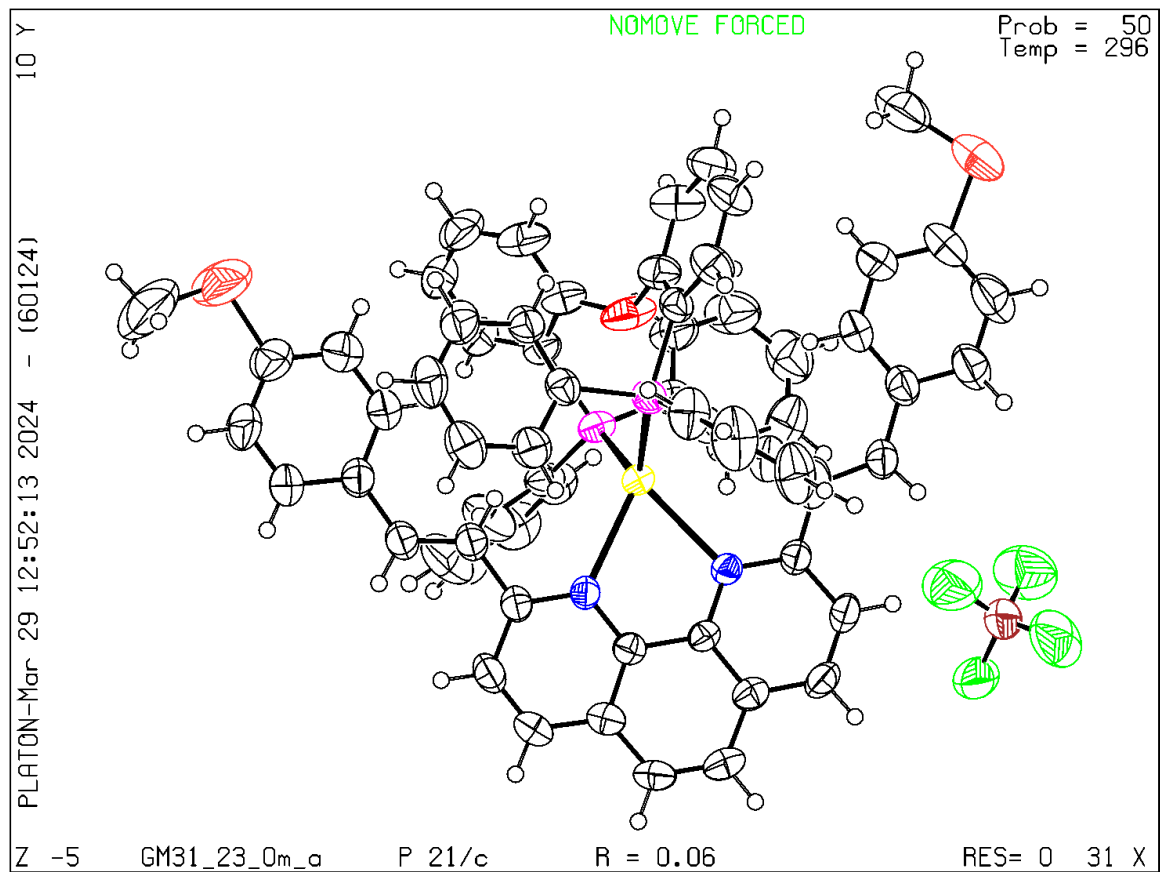

Supplement: s1 [file s1]
