# Supplementary material
Source: MDPI journal article supplement (https://www.mdpi.com/2304-6740/12/5/131)
Supplement: s1 [file s1]

# Supplementary Materials

## Synthesis, Spectroscopic Characterization and Photophysical Studies of Heteroleptic Silver Complexes bearing 2,9-Bis(styryl)-1,10-phenanthroline ligands and Bis [(2-diphenylphosphino) phenyl] ether

Dimitrios Glykos <sup>1</sup>, Athanassios C. Tsipis <sup>1</sup>, John C. Plakatouras <sup>1,2</sup> and Gerasimos Malandrinos <sup>1,\*</sup>

<sup>1</sup> Laboratory of Inorganic Chemistry, Department of Chemistry, University of Ioannina, 451 10 Ioannina, Greece; d.glykos@uoi.gr (D.G.); iplakatu@uoi.gr (J.C.P.)

<sup>2</sup> Institute of Materials Science and Computing, University Research Center of Ioannina, 451 10 Ioannina, Greece

\* Correspondence: [gmalandr@uoi.gr](mailto:gmalandr@uoi.gr)

### TABLE OF CONTENTS

**Experimental.** Synthesis of Ligands.

**Figure S1-S3.** ATR-IR spectra of complexes **1-3**.

**Figure S4.** <sup>1</sup>H-NMR spectrum of **L2** (500 MHz, CDCl<sub>3</sub>, 298K)

**Figure S5.** <sup>13</sup>C-NMR spectrum of **L2** (500 MHz, CDCl<sub>3</sub>, 298K).

**Figure S6.** <sup>1</sup>H-NMR spectrum of **L3** (500 MHz, CDCl<sub>3</sub>, 298K).

**Figure S7.** <sup>13</sup>C-NMR spectrum of **L3** (500 MHz, CDCl<sub>3</sub>, 298K).

**Figure S8.** <sup>1</sup>H-NMR spectrum of **1** (500 MHz, CDCl<sub>3</sub>, 298K).

**Figure S9.** <sup>13</sup>C-NMR spectrum of **1** (500 MHz, CDCl<sub>3</sub>, 298K).

**Figure S10.** <sup>1</sup>H-<sup>1</sup>H COSY NMR spectrum of **1** (500 MHz, CDCl<sub>3</sub>, 298K).

**Figure S11.** <sup>1</sup>H-NMR spectrum of **2** (500 MHz, CDCl<sub>3</sub>, 298K).

**Figure S12.** <sup>13</sup>C-NMR spectrum of **2** (500 MHz, CDCl<sub>3</sub>, 298K) .

**Figure S13.** <sup>1</sup>H-<sup>1</sup>H COSY NMR spectrum of **2** (500 MHz, CDCl<sub>3</sub>, 298K).

**Figure S14.** <sup>1</sup>H-NMR spectrum of **3** (500 MHz, CDCl<sub>3</sub>, 298K).

**Figure S15.** <sup>13</sup>C-NMR spectrum of **3** (500 MHz, CDCl<sub>3</sub>, 298K).

**Figure S16.** <sup>1</sup>H-<sup>1</sup>H COSY NMR spectrum of **3** (500 MHz, CDCl<sub>3</sub>, 298K).

**Figure S17.** 3D contour plots of the MOs involved in the electronic excitations giving rise to the two bands appearing in the simulated absorption spectra of **2** calculated at the PBE0/LANL2TZ(Ag)U6-31G(d,p) level of theory in DCM solvent.

**Figure S18.** 3D contour plots of the MOs involved in the electronic excitations giving rise to the two bands appearing in the simulated absorption spectra of **3** calculated at the PBE0/LANL2TZ(Ag)U6-31G(d,p) level of theory in DCM solvent.

**Figure S19.** HR-ESI-MS spectrum of the fragment [AgL]<sup>+</sup> **1** (top) and theoretical spectrum.

**Figure S20.** HR-ESI-MS spectrum of the fragment [AgL]<sup>+</sup> **2** (top) and theoretical spectrum.

**Figure S21.** HR-ESI-MS spectrum of the fragment [AgL]<sup>+</sup> **3** (top) and theoretical spectrum.

**Figure S22.** HR-ESI-MS spectrum of the fragment [L2+H]<sup>+</sup> (top) and theoretical spectrum.

**Figure S23.** HR-ESI-MS spectrum of the fragment [L3+H]<sup>+</sup> (top) and theoretical spectrum.

## Experimental.

### Synthesis of Ligands

General procedure for the synthesis of compounds L2 and L3: Potassium tert-butoxide (486 mg, 3.5 mmol) was slowly added to a solution of the appropriate 4-substituted benzaldehyde derivative (2.2 mmol) and neocuproine hemihydrate (1.0 mmol) in anhydrous DMF (5 mL). The mixture was stirred for 4-6 hours at 50°C, and the reaction progress was monitored by TLC. The reaction mixture was quenched by the addition of water, and the residue obtained was collected by filtration, dissolved in CH<sub>2</sub>Cl<sub>2</sub>, and washed with an aqueous K<sub>2</sub>CO<sub>3</sub> solution. After the removal of the solvent, the crude product was recrystallized from dichloromethane/cyclohexane.

**2,9-bis((E)-4-methylthiostyryl)-1,10-phenanthroline (L2):** orange solid. Yield 50%. <sup>1</sup>H NMR (500 MHz, CDCl<sub>3</sub>) (ppm): 8.23 (d, *J* = 8.4 Hz, 2H); 7.94 (d, *J* = 8.4 Hz, 2H); 7.77 (d, *J* = 16.1 Hz, 4H); 7.75 (s, 2H); 7.69 (d, *J* = 16.1 Hz, 4H); 7.64 (d, *J* = 8.4 Hz, 4H); 7.32 (d, *J* = 8.4 Hz, 4H); 2.56 (s, 6H).

HR ESI-MS: *m/z* = 477.1454 for [L2+H]<sup>+</sup> (Figure S22).

**2,9-bis((E)-4-diethylaminostyryl)-1,10-phenanthroline (L3):** orange solid. Yield 62%. <sup>1</sup>H NMR (500 MHz, CDCl<sub>3</sub>) (ppm): 8.16 (d, *J* = 8.5 Hz, 2H); 7.90 (d, *J* = 8.6 Hz, 2H); 7.72 (d, *J* = 16.3 Hz, 4H); 7.68 (s, 2H); 7.60 (d, *J* = 8.6 Hz, 4H); 7.54 (d, *J* = 16.3 Hz, 4H); 6.73 (d, *J* = 8.6 Hz, 4H); 3.45 (q, *J* = 7.1 Hz, 8H); 1.24 (t, *J* = 7.1 Hz, 12H).

HR ESI-MS: *m/z* = 527.3169 for [L3+H]<sup>+</sup> (Figure S23).

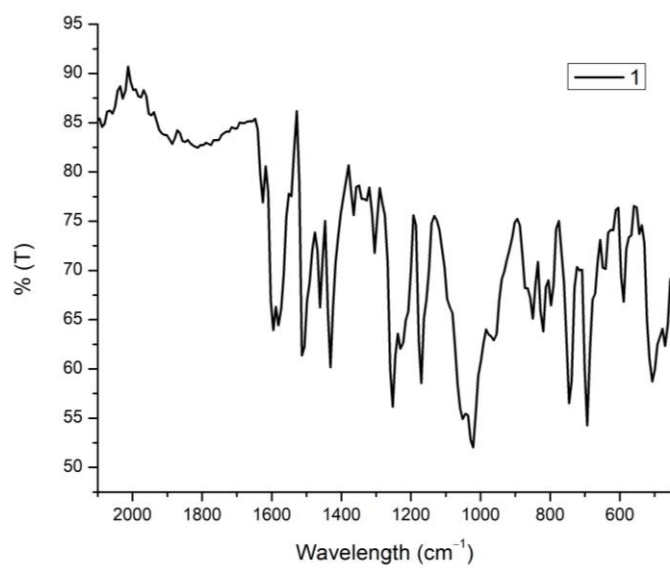

**Figure S1.** ATR-IR spectrum of complex 1.

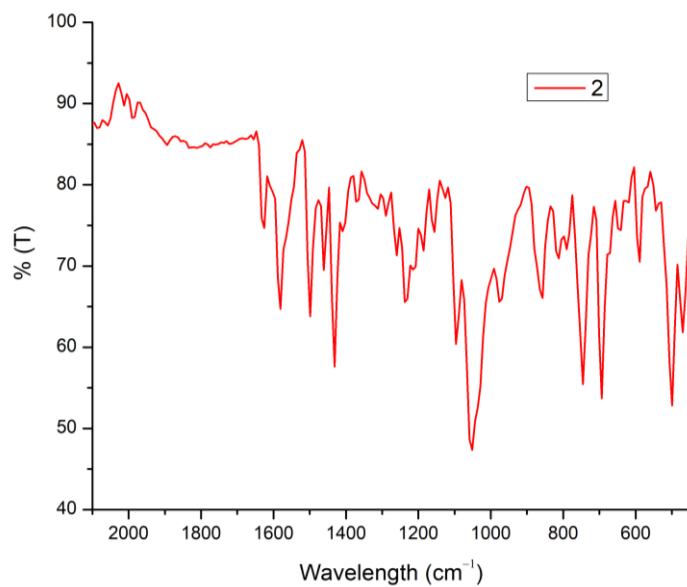

**Figure S2.** ATR-IR spectrum of complex 2.

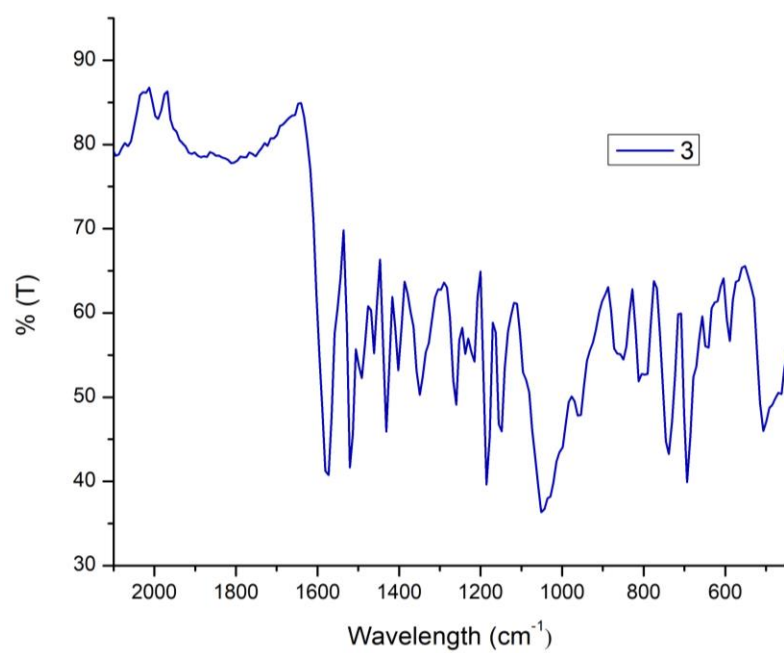

**Figure S3.** ATR-IR spectrum of complex 3.

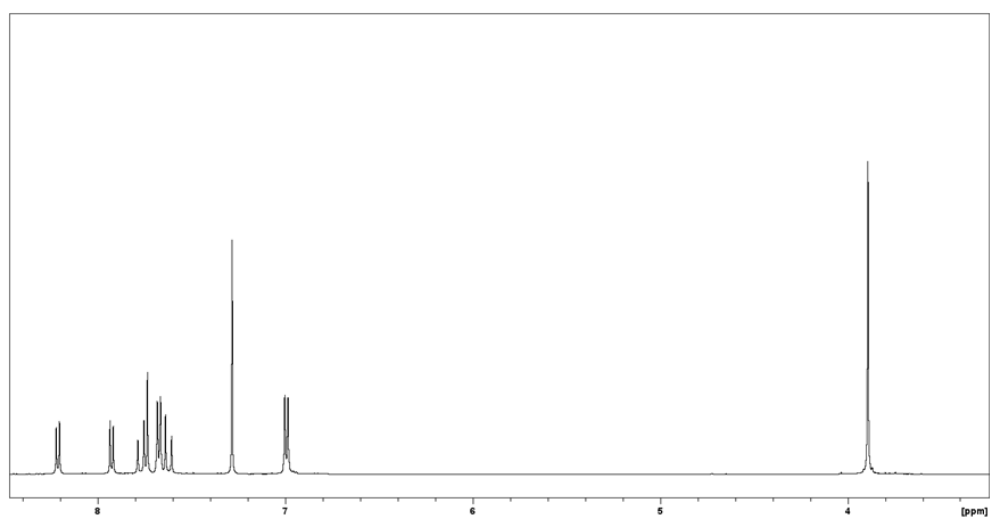

**Figure S4.** <sup>1</sup>H-NMR spectrum of L2 (500 MHz, CDCl<sub>3</sub>, 298K).

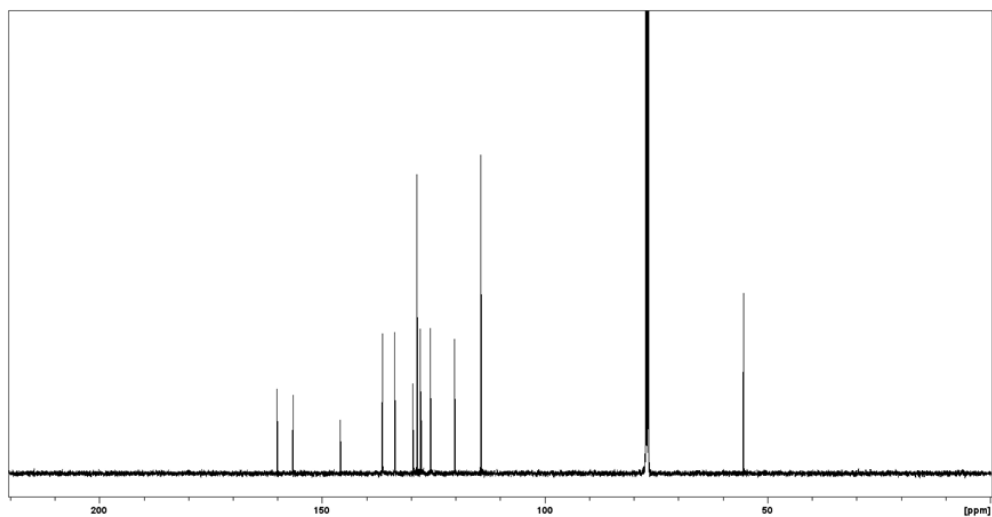

**Figure S5.**  $^{13}\text{C}$ -NMR spectrum of L2 (500 MHz,  $\text{CDCl}_3$ , 298K).

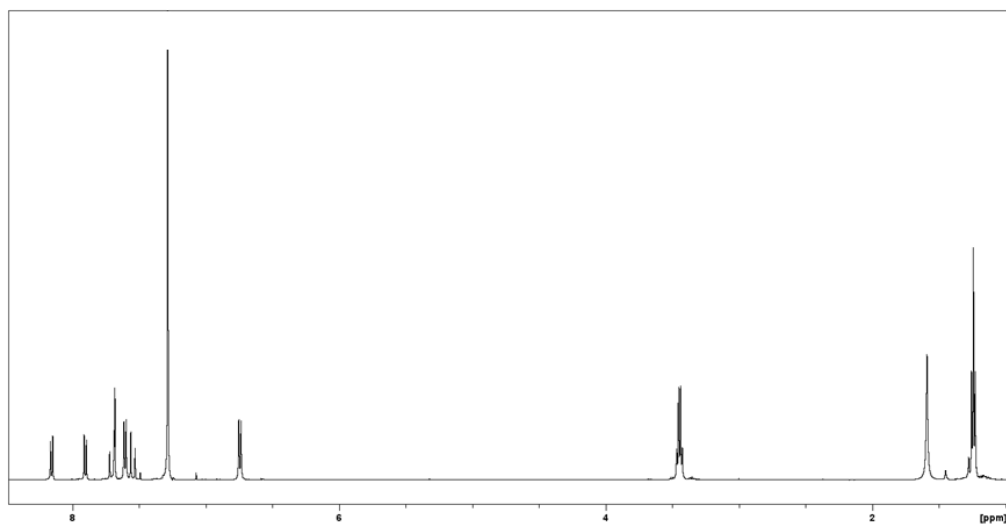

**Figure S6.**  $^1\text{H}$ -NMR spectrum of L3 (500 MHz,  $\text{CDCl}_3$ , 298K).

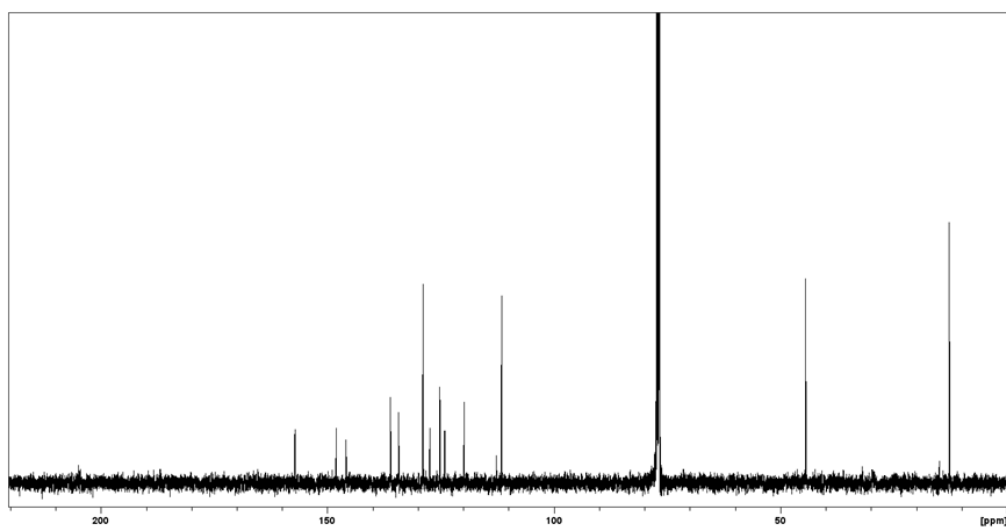

**Figure S7.**  $^{13}\text{C}$ -NMR spectrum of L3 (500 MHz,  $\text{CDCl}_3$ , 298K).

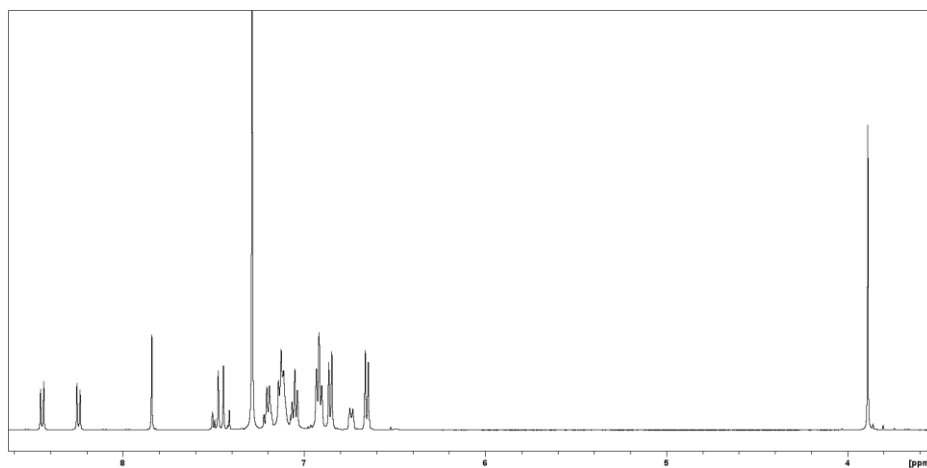

**Figure S8.**  $^1\text{H}$ -NMR spectrum of **1** (500 MHz,  $\text{CDCl}_3$ , 298K).

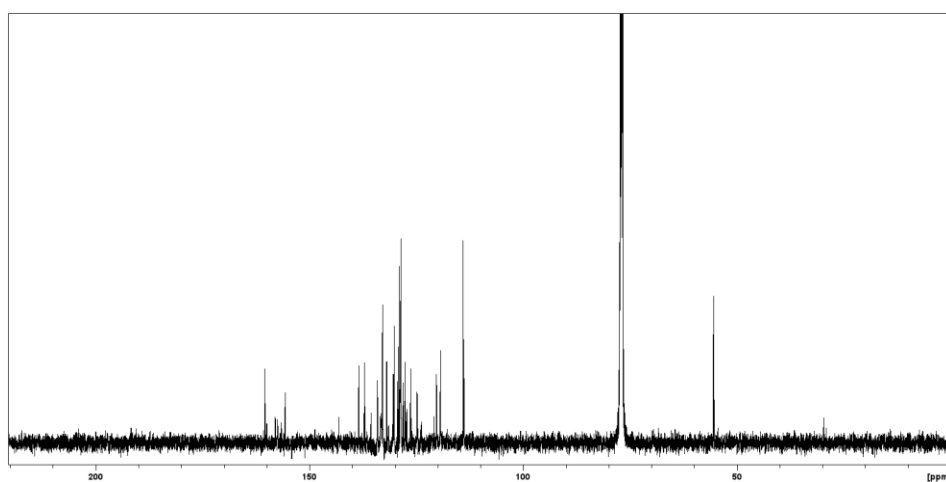

**Figure S9.**  $^{13}\text{C}$ -NMR spectrum of **1** (500 MHz,  $\text{CDCl}_3$ , 298K).

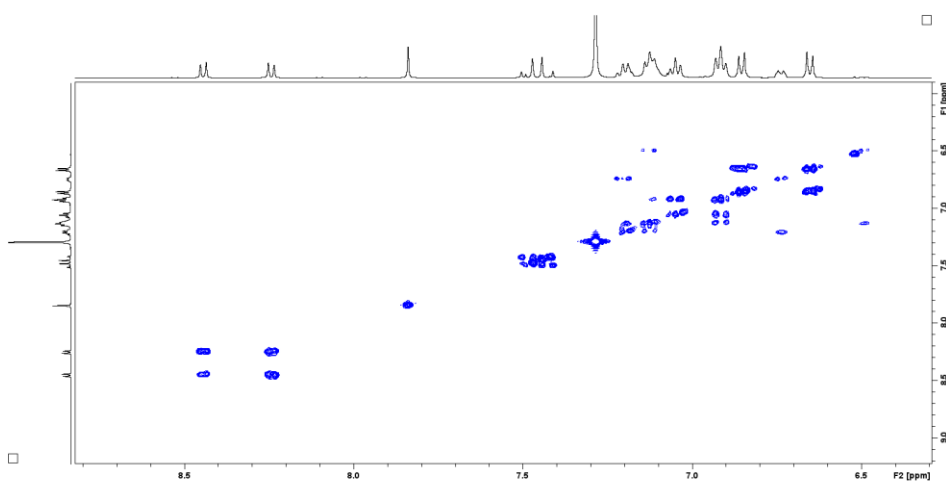

**Figure S10.**  $^1\text{H}$ - $^1\text{H}$  COSY NMR spectrum of **1** (500 MHz,  $\text{CDCl}_3$ , 298K).

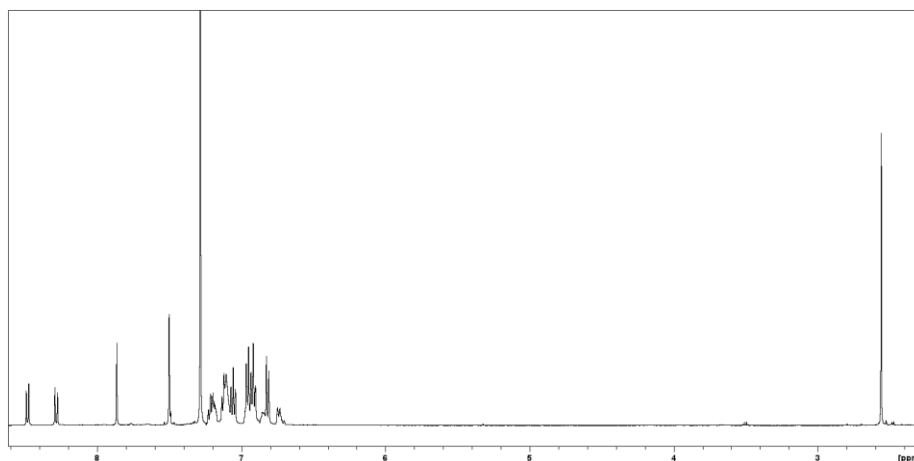

**Figure S11.**  $^1\text{H}$ -NMR spectrum of **2** (500 MHz,  $\text{CDCl}_3$ , 298K).

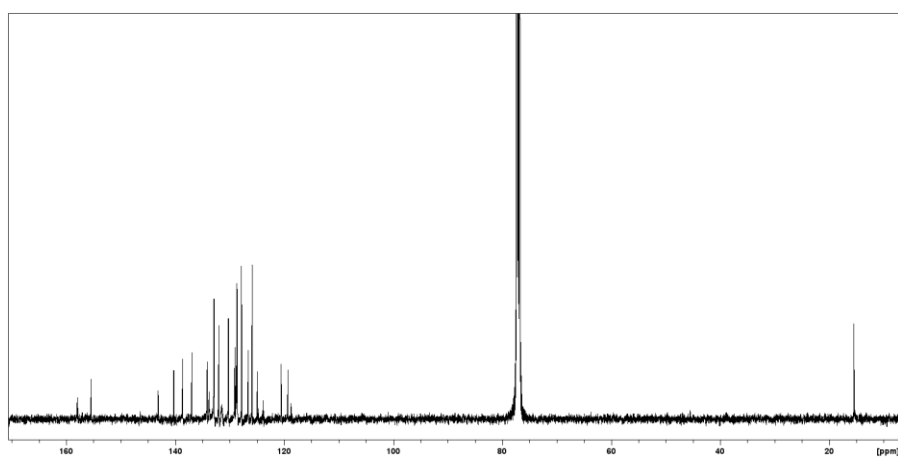

**Figure S12.**  $^{13}\text{C}$ -NMR spectrum of **2** (500 MHz,  $\text{CDCl}_3$ , 298K) .

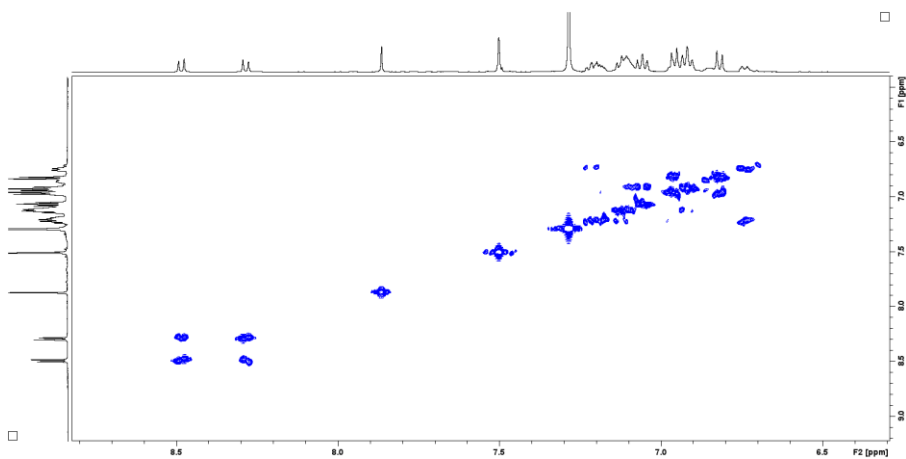

**Figure S13.**  $^1\text{H}$ - $^1\text{H}$  COSY NMR spectrum of **2** (500 MHz,  $\text{CDCl}_3$ , 298K).

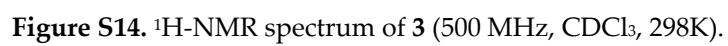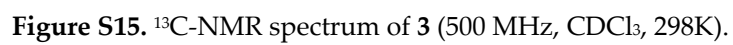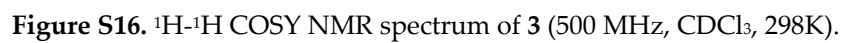



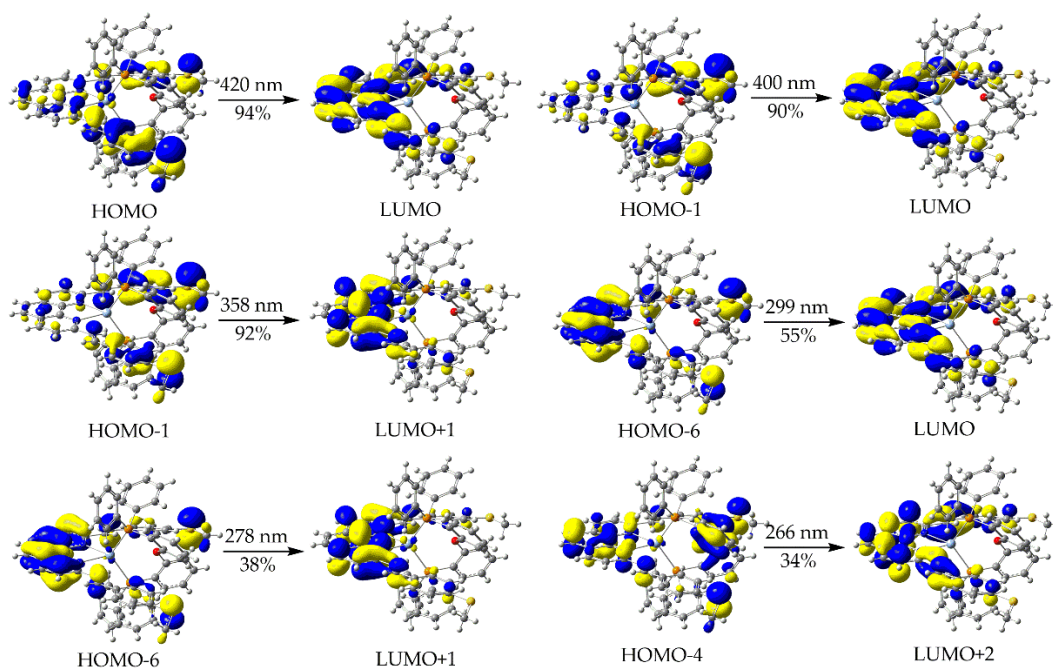

**Figure S17.** 3D contour plots of the MOs involved in the electronic excitations giving rise to the two bands appearing in the simulated absorption spectra of **2** calculated at the PBE0/LANL2TZ(Ag)U6-31G(d,p) level of theory in DCM solvent.

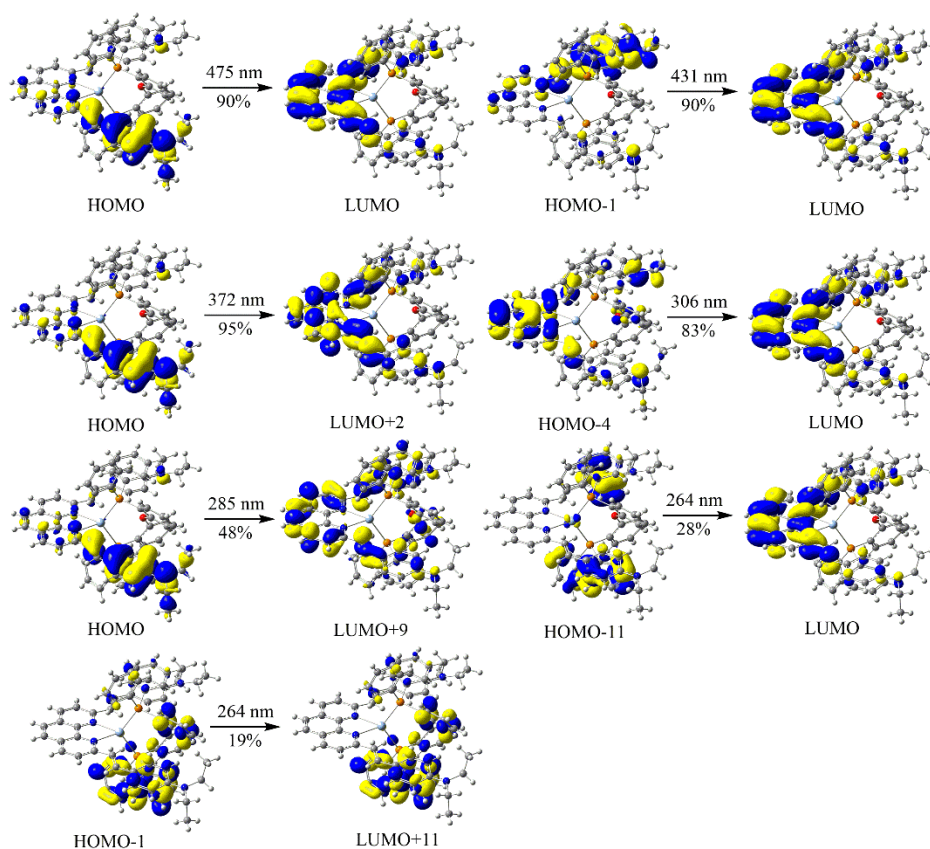

**Figure S18.** 3D contour plots of the MOs involved in the electronic excitations giving rise to the two bands appearing in the simulated absorption spectra of **3** calculated at the PBE0/LANL2TZ(Ag)U6-31G(d,p) level of theory in DCM solvent.

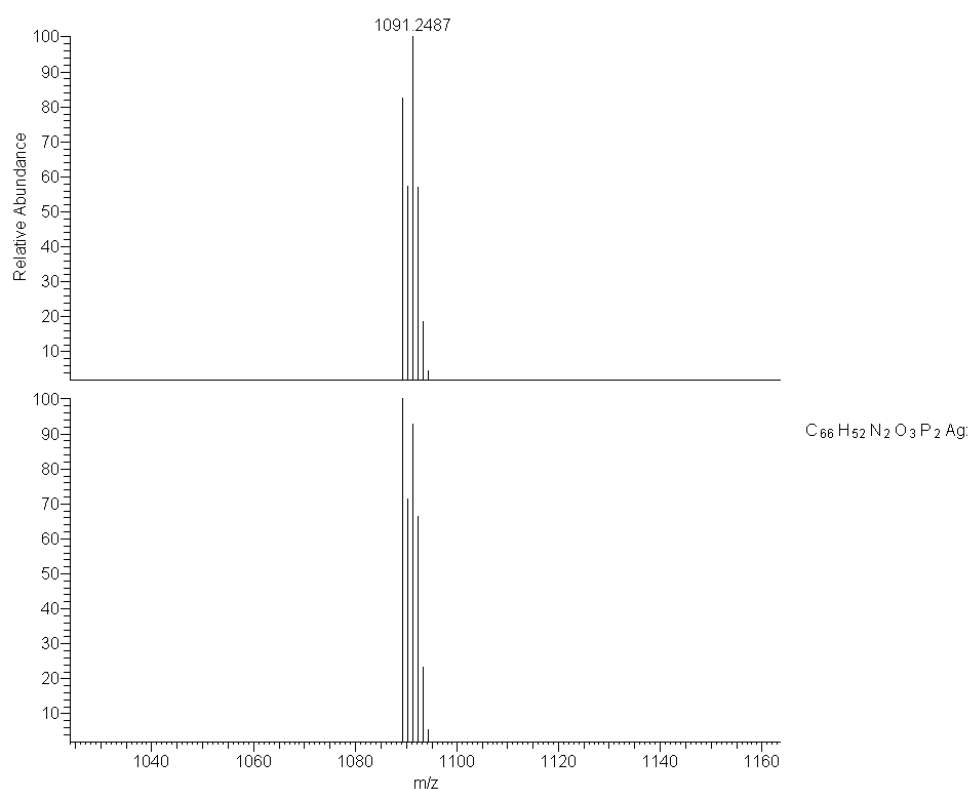

**Figure S19.** HR-ESI-MS spectrum of the fragment  $[\text{AgL}]^+ \mathbf{1}$  (top) and theoretical spectrum.

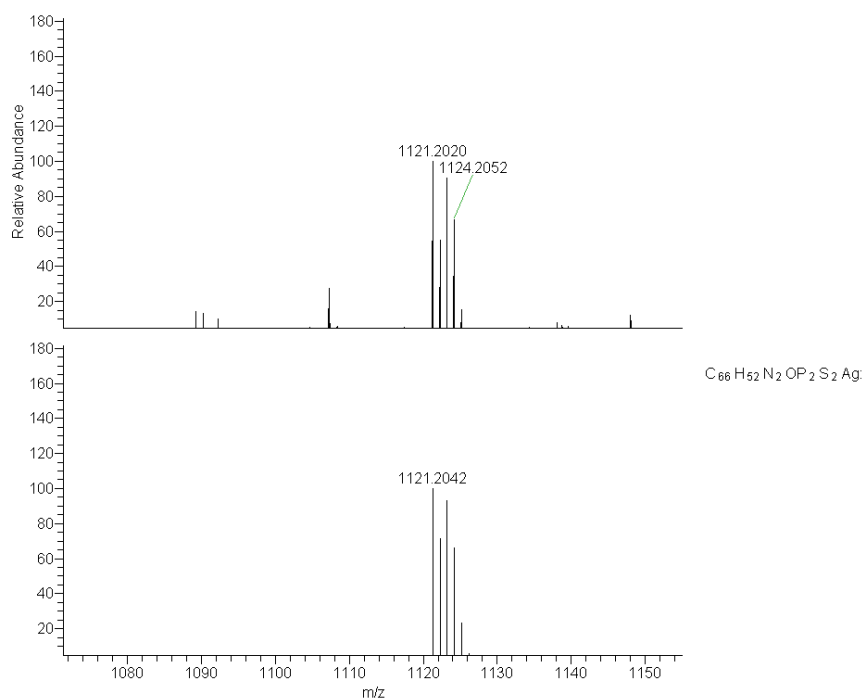

**Figure S20.** HR-ESI-MS spectrum of the fragment  $[\text{AgL}]^+ \mathbf{2}$  (top) and theoretical spectrum.

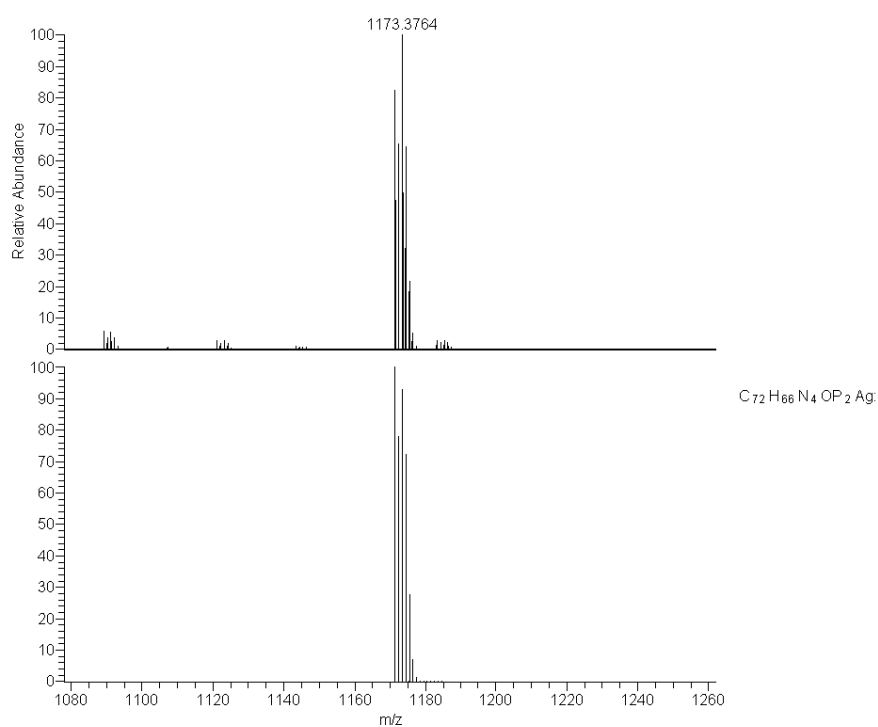

**Figure S21.** HR-ESI-MS spectrum of the fragment  $[\text{AgL}]^+ \mathbf{3}$  (top) and theoretical spectrum.

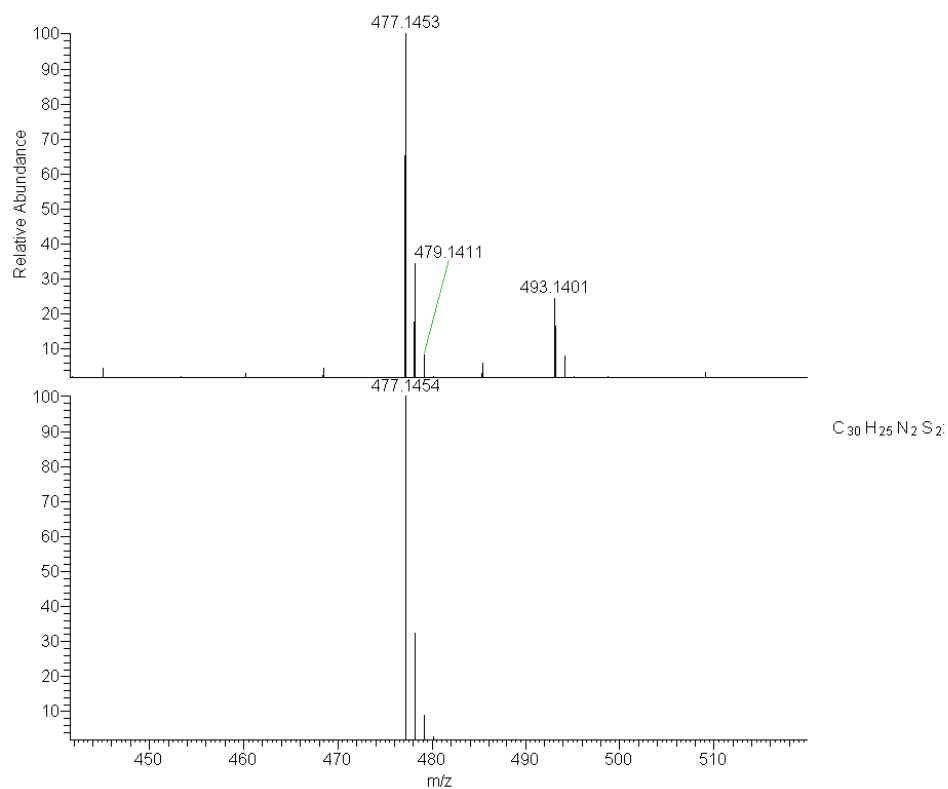

**Figure S22.** HR-ESI-MS spectrum of the fragment  $[\text{L2}+\text{H}]^+$  (top) and theoretical spectrum.

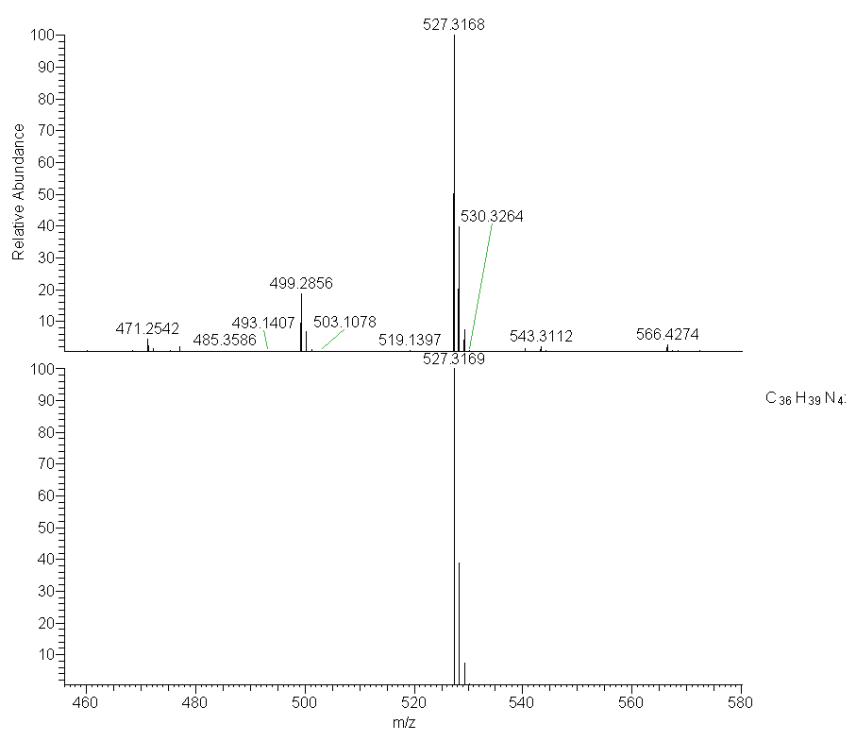

**Figure S23.** HR-ESI-MS spectrum of the fragment  $[L3+H]^+$  (top) and theoretical spectrum.
