# Supplementary material
Source: MDPI journal article supplement (https://www.mdpi.com/2304-6740/12/5/131)
Supplement: s1 [file s1]

Archive with 7 entries (7 files):
- GM16_22B_0m.cif
- GM16_22B_0m.pdf
- GM31_23_0m_a.cif
- GM31_23_0m_a.pdf
- gm7_23_a_sq.cif
- gm7_23_a_sq.pdf
- Supplementary Materials_Glykos_et_al.pdf
