# Supplementary material
Source: MDPI journal article supplement (https://www.mdpi.com/2304-6740/12/5/131)
Supplement: s1 [file s1 › gm7_23_a_sq.cif]

 
data_gm7_23_a_sq
 
_audit_creation_method            'SHELXL-2018/3'
_shelx_SHELXL_version_number      '2018/3'
_chemical_name_systematic         ?
_chemical_name_common             ?
_chemical_melting_point           ?
_chemical_formula_moiety          ?
_chemical_formula_sum
 'C72 H66 Ag F0 N4 O P2' 
_chemical_formula_weight          1173.10

loop_
 _atom_type_symbol
 _atom_type_description
 _atom_type_scat_dispersion_real
 _atom_type_scat_dispersion_imag
 _atom_type_scat_source
 'C'  'C'   0.0033   0.0016
 'International Tables Vol C Tables 4.2.6.8 and 6.1.1.4'
 'H'  'H'   0.0000   0.0000
 'International Tables Vol C Tables 4.2.6.8 and 6.1.1.4'
 'Ag'  'Ag'  -0.8971   1.1015
 'International Tables Vol C Tables 4.2.6.8 and 6.1.1.4'
 'F'  'F'   0.0171   0.0103
 'International Tables Vol C Tables 4.2.6.8 and 6.1.1.4'
 'N'  'N'   0.0061   0.0033
 'International Tables Vol C Tables 4.2.6.8 and 6.1.1.4'
 'P'  'P'   0.1023   0.0942
 'International Tables Vol C Tables 4.2.6.8 and 6.1.1.4'
 'O'  'O'   0.0106   0.0060
 'International Tables Vol C Tables 4.2.6.8 and 6.1.1.4'
 
_space_group_crystal_system       trigonal
_space_group_IT_number            152
_space_group_name_H-M_alt         'P 31 2 1'
_space_group_name_Hall            'P 31 2"'
 
_shelx_space_group_comment
;
The symmetry employed for this shelxl refinement is uniquely defined
by the following loop, which should always be used as a source of
symmetry information in preference to the above space-group names.
They are only intended as comments.
;
 
loop_
 _space_group_symop_operation_xyz
 'x, y, z'
 '-y, x-y, z+1/3'
 '-x+y, -x, z+2/3'
 'y, x, -z'
 'x-y, -y, -z+2/3'
 '-x, -x+y, -z+1/3'
 
_cell_length_a                    19.328(4)
_cell_length_b                    19.328(4)
_cell_length_c                    32.247(6)
_cell_angle_alpha                 90.00(3)
_cell_angle_beta                  90.00(3)
_cell_angle_gamma                 120.00(3)
_cell_volume                      10433(5)
_cell_formula_units_Z             6
_cell_measurement_temperature     293(2)
_cell_measurement_reflns_used     9224
_cell_measurement_theta_min       4.87
_cell_measurement_theta_max       49.86
 
_exptl_crystal_description        block
_exptl_crystal_colour             yellow
_exptl_crystal_density_meas       ?
_exptl_crystal_density_method     ?
_exptl_crystal_density_diffrn     1.120          
_exptl_crystal_F_000              3666
_exptl_transmission_factor_min    ?
_exptl_transmission_factor_max    ?
_exptl_crystal_size_max           0.600
_exptl_crystal_size_mid           0.500
_exptl_crystal_size_min           0.400
_exptl_absorpt_coefficient_mu     0.377
_shelx_estimated_absorpt_T_min    0.805
_shelx_estimated_absorpt_T_max    0.864
_exptl_absorpt_correction_type    Multi-Scan
_exptl_absorpt_correction_T_min   0.75
_exptl_absorpt_correction_T_max   0.86
_exptl_absorpt_process_details    
;
Krause, L., Herbst-Irmer, R., Sheldrick, G. M., Stalke, D. (2015).
"Comparison of silver and molybdenum microfocus X-ray sources for
single-crystal structure determination"
J. Appl. Cryst. 48, 3-10.
doi:10.1107/S1600576714022985
;
_exptl_absorpt_special_details    ?
_diffrn_ambient_temperature       293(2)
_diffrn_radiation_wavelength      0.71073
_diffrn_radiation_type            MoK\a
_diffrn_source                    'sealed tube'
_diffrn_measurement_device_type   'Bruker D8 Eco with PHOTON II detector'
_diffrn_measurement_method        '/f and /w shutterless scans'
_diffrn_detector_area_resol_mean  7.3910
_diffrn_reflns_number             127376
_diffrn_reflns_av_unetI/netI      0.0201
_diffrn_reflns_av_R_equivalents   0.0360
_diffrn_reflns_limit_h_min        -22
_diffrn_reflns_limit_h_max        22
_diffrn_reflns_limit_k_min        -22
_diffrn_reflns_limit_k_max        22
_diffrn_reflns_limit_l_min        -38
_diffrn_reflns_limit_l_max        38
_diffrn_reflns_theta_min          2.457
_diffrn_reflns_theta_max          25.056
_diffrn_reflns_theta_full         25.056
_diffrn_measured_fraction_theta_max   0.997
_diffrn_measured_fraction_theta_full  0.997
_diffrn_reflns_Laue_measured_fraction_max    0.997
_diffrn_reflns_Laue_measured_fraction_full   0.997
_diffrn_reflns_point_group_measured_fraction_max   0.997
_diffrn_reflns_point_group_measured_fraction_full  0.997
_reflns_number_total              12286
_reflns_number_gt                 11128
_reflns_threshold_expression      'I > 2\s(I)'
_reflns_Friedel_coverage          0.826
_reflns_Friedel_fraction_max      0.998
_reflns_Friedel_fraction_full     0.998
 
_reflns_special_details
;
 Reflections were merged by SHELXL according to the crystal
 class for the calculation of statistics and refinement.
 
 Structure factors included contributions from the .fab file.
 
 _reflns_Friedel_fraction is defined as the number of unique
 Friedel pairs measured divided by the number that would be
 possible theoretically, ignoring centric projections and
 systematic absences.
;
 
_computing_data_collection        ?
_computing_cell_refinement        ?
_computing_data_reduction         ?
_computing_structure_solution     'SHELXT 2014/5 (Sheldrick, 2014)'
_computing_structure_refinement 'SHELXL-2018/3 (Sheldrick, 2018)'
_computing_molecular_graphics     ?
_computing_publication_material   ?
_refine_special_details           ?
_refine_ls_structure_factor_coef  Fsqd
_refine_ls_matrix_type            full
_refine_ls_weighting_scheme       calc
_refine_ls_weighting_details
'w=1/[\s^2^(Fo^2^)+(0.0266P)^2^+7.0670P] where P=(Fo^2^+2Fc^2^)/3'
_atom_sites_solution_primary      ?
_atom_sites_solution_secondary    ?
_atom_sites_solution_hydrogens    geom
_refine_ls_hydrogen_treatment     constr
_refine_ls_extinction_method      none
_refine_ls_extinction_coef        .
_refine_ls_abs_structure_details
;
 Flack x determined using 4740 quotients [(I+)-(I-)]/[(I+)+(I-)]
 (Parsons, Flack and Wagner, Acta Cryst. B69 (2013) 249-259).
;
_refine_ls_abs_structure_Flack    -0.005(5)
_chemical_absolute_configuration  ?
_refine_ls_number_reflns          12286
_refine_ls_number_parameters      743
_refine_ls_number_restraints      64
_refine_ls_R_factor_all           0.0444
_refine_ls_R_factor_gt            0.0366
_refine_ls_wR_factor_ref          0.0864
_refine_ls_wR_factor_gt           0.0804
_refine_ls_goodness_of_fit_ref    1.079
_refine_ls_restrained_S_all       1.082
_refine_ls_shift/su_max           0.001
_refine_ls_shift/su_mean          0.000
 
loop_
 _atom_site_label
 _atom_site_type_symbol
 _atom_site_fract_x
 _atom_site_fract_y
 _atom_site_fract_z
 _atom_site_U_iso_or_equiv
 _atom_site_adp_type
 _atom_site_occupancy
 _atom_site_site_symmetry_order  
 _atom_site_calc_flag
 _atom_site_refinement_flags_posn
 _atom_site_refinement_flags_adp
 _atom_site_refinement_flags_occupancy
 _atom_site_disorder_assembly
 _atom_site_disorder_group
Ag1 Ag 0.47251(2) 0.48602(2) 0.24678(2) 0.04933(10) Uani 1 1 d . . . . .
N1 N 0.3956(2) 0.3647(2) 0.21069(10) 0.0437(8) Uani 1 1 d . . . . .
N2 N 0.3560(2) 0.4025(2) 0.28614(10) 0.0448(8) Uani 1 1 d . . . . .
N3 N 0.8090(5) 0.6339(5) 0.0440(2) 0.185(5) Uani 1 1 d D U . . .
N4 N 0.6098(3) 0.8268(3) 0.44819(14) 0.0851(16) Uani 1 1 d . . . . .
C1 C 0.4146(3) 0.3477(2) 0.17369(12) 0.0459(10) Uani 1 1 d . . . . .
C2 C 0.3642(3) 0.2738(3) 0.15380(14) 0.0581(12) Uani 1 1 d . . . . .
H2 H 0.378115 0.262811 0.128047 0.070 Uiso 1 1 calc R U . . .
C3 C 0.2959(3) 0.2196(3) 0.17236(16) 0.0621(13) Uani 1 1 d . . . . .
H3 H 0.262637 0.171351 0.159157 0.075 Uiso 1 1 calc R U . . .
C4 C 0.2741(3) 0.2353(3) 0.21189(15) 0.0558(12) Uani 1 1 d . . . . .
C5 C 0.3267(3) 0.3102(3) 0.22959(14) 0.0449(10) Uani 1 1 d . . . . .
C6 C 0.2030(3) 0.1797(3) 0.2328(2) 0.0720(16) Uani 1 1 d . . . . .
H6 H 0.168976 0.130437 0.220752 0.086 Uiso 1 1 calc R U . . .
C7 C 0.1845(3) 0.1979(4) 0.2699(2) 0.0759(17) Uani 1 1 d . . . . .
H7 H 0.137691 0.161040 0.283156 0.091 Uiso 1 1 calc R U . . .
C8 C 0.3058(3) 0.3293(3) 0.26921(14) 0.0452(10) Uani 1 1 d . . . . .
C9 C 0.2357(3) 0.2729(3) 0.28903(15) 0.0563(12) Uani 1 1 d . . . . .
C10 C 0.2184(3) 0.2942(3) 0.32785(16) 0.0689(14) Uani 1 1 d . . . . .
H10 H 0.172297 0.258455 0.342045 0.083 Uiso 1 1 calc R U . . .
C11 C 0.2685(3) 0.3665(3) 0.34449(15) 0.0641(13) Uani 1 1 d . . . . .
H11 H 0.257161 0.380404 0.370160 0.077 Uiso 1 1 calc R U . . .
C12 C 0.3380(3) 0.4206(3) 0.32293(13) 0.0480(10) Uani 1 1 d . . . . .
C13 C 0.3936(3) 0.4998(3) 0.33930(14) 0.0520(11) Uani 1 1 d . . . . .
H13 H 0.431622 0.535912 0.320936 0.062 Uiso 1 1 calc R U . . .
C14 C 0.3956(3) 0.5259(3) 0.37786(14) 0.0540(12) Uani 1 1 d . . . . .
H14 H 0.357056 0.489621 0.395967 0.065 Uiso 1 1 calc R U . . .
C15 C 0.4501(3) 0.6035(3) 0.39486(14) 0.0537(12) Uani 1 1 d . . . . .
C16 C 0.5099(3) 0.6659(3) 0.37194(14) 0.0585(13) Uani 1 1 d . . . . .
H16 H 0.514852 0.657998 0.343900 0.070 Uiso 1 1 calc R U . . .
C17 C 0.5611(3) 0.7377(3) 0.38899(15) 0.0639(13) Uani 1 1 d . . . . .
H17 H 0.599756 0.777458 0.372257 0.077 Uiso 1 1 calc R U . . .
C18 C 0.5577(4) 0.7541(3) 0.43127(15) 0.0651(14) Uani 1 1 d . . . . .
C19 C 0.4969(4) 0.6918(4) 0.45446(15) 0.0718(16) Uani 1 1 d . . . . .
H19 H 0.491528 0.699588 0.482460 0.086 Uiso 1 1 calc R U . . .
C20 C 0.4453(3) 0.6194(3) 0.43648(15) 0.0651(14) Uani 1 1 d . . . . .
H20 H 0.405673 0.579644 0.452781 0.078 Uiso 1 1 calc R U . . .
C21 C 0.6751(5) 0.8890(4) 0.4242(2) 0.105(2) Uani 1 1 d . . . . .
H21A H 0.695288 0.864304 0.405194 0.126 Uiso 1 1 calc R U . . .
H21B H 0.718226 0.922931 0.442893 0.126 Uiso 1 1 calc R U . . .
C22 C 0.6509(6) 0.9399(5) 0.3999(3) 0.143(4) Uani 1 1 d . . . . .
H22A H 0.695792 0.978855 0.384207 0.214 Uiso 1 1 calc R U . . .
H22B H 0.633267 0.966514 0.418577 0.214 Uiso 1 1 calc R U . . .
H22C H 0.608244 0.906686 0.381291 0.214 Uiso 1 1 calc R U . . .
C23 C 0.6074(5) 0.8431(4) 0.49227(17) 0.094(2) Uani 1 1 d . . . . .
H23A H 0.552383 0.815975 0.501673 0.113 Uiso 1 1 calc R U . . .
H23B H 0.629249 0.900015 0.496268 0.113 Uiso 1 1 calc R U . . .
C24 C 0.6542(6) 0.8157(5) 0.5176(2) 0.142(4) Uani 1 1 d . . . . .
H24A H 0.632359 0.759266 0.513879 0.212 Uiso 1 1 calc R U . . .
H24B H 0.651282 0.826840 0.546339 0.212 Uiso 1 1 calc R U . . .
H24C H 0.708989 0.843423 0.508763 0.212 Uiso 1 1 calc R U . . .
C25 C 0.4895(3) 0.4080(3) 0.15584(14) 0.0493(11) Uani 1 1 d . . . . .
H25 H 0.521886 0.451009 0.172872 0.059 Uiso 1 1 calc R U . . .
C26 C 0.5177(3) 0.4092(3) 0.11789(15) 0.0552(12) Uani 1 1 d . . . . .
H26 H 0.484983 0.365945 0.101059 0.066 Uiso 1 1 calc R U . . .
C27 C 0.5916(3) 0.4681(3) 0.09948(14) 0.0553(12) Uani 1 1 d . . . . .
C28 C 0.6117(3) 0.4567(3) 0.05929(15) 0.0689(15) Uani 1 1 d . . . . .
H28 H 0.576227 0.411128 0.044692 0.083 Uiso 1 1 calc R U . . .
C29 C 0.6815(4) 0.5104(4) 0.04106(18) 0.091(2) Uani 1 1 d . . . . .
H29 H 0.691564 0.501330 0.013980 0.109 Uiso 1 1 calc R U . . .
C30 C 0.7392(5) 0.5794(5) 0.0620(2) 0.116(3) Uani 1 1 d . . . . .
C31 C 0.7189(4) 0.5901(4) 0.1023(2) 0.108(3) Uani 1 1 d . . . . .
H31 H 0.754203 0.635228 0.117338 0.130 Uiso 1 1 calc R U . . .
C32 C 0.6489(4) 0.5358(3) 0.11961(17) 0.0808(18) Uani 1 1 d . . . . .
H32 H 0.638568 0.544463 0.146707 0.097 Uiso 1 1 calc R U . . .
C33 C 0.8269(6) 0.6273(7) -0.0032(4) 0.167(4) Uani 1 1 d . U . . .
H33A H 0.778984 0.601940 -0.020088 0.200 Uiso 1 1 calc R U . . .
H33B H 0.865677 0.678249 -0.015129 0.200 Uiso 1 1 calc R U . . .
C34 C 0.8585(6) 0.5774(7) 0.0049(4) 0.177(5) Uani 1 1 d . U . . .
H34A H 0.868383 0.558949 -0.020885 0.265 Uiso 1 1 calc R U . . .
H34B H 0.821077 0.532513 0.021038 0.265 Uiso 1 1 calc R U . . .
H34C H 0.907666 0.606658 0.019913 0.265 Uiso 1 1 calc R U . . .
C35 C 0.841(3) 0.718(2) 0.0529(17) 0.147(12) Uani 0.302(18) 1 d D U P A 1
H35A H 0.873535 0.722009 0.077013 0.176 Uiso 0.302(18) 1 calc R U P A 1
H35B H 0.880010 0.740021 0.030568 0.176 Uiso 0.302(18) 1 calc R U P A 1
C36 C 0.831(3) 0.775(3) 0.0596(19) 0.28(3) Uani 0.302(18) 1 d D U P A 1
H36A H 0.882135 0.821770 0.064056 0.413 Uiso 0.302(18) 1 calc R U P A 1
H36B H 0.805324 0.782350 0.036248 0.413 Uiso 0.302(18) 1 calc R U P A 1
H36C H 0.798684 0.763878 0.083882 0.413 Uiso 0.302(18) 1 calc R U P A 1
C35' C 0.8781(15) 0.6975(17) 0.0703(7) 0.221(13) Uani 0.698(18) 1 d D U P A 2
H35C H 0.911393 0.740723 0.051542 0.265 Uiso 0.698(18) 1 calc R U P A 2
H35D H 0.854355 0.718573 0.089365 0.265 Uiso 0.698(18) 1 calc R U P A 2
C36' C 0.9329(15) 0.682(2) 0.0952(8) 0.319(19) Uani 0.698(18) 1 d D U P A 2
H36D H 0.971119 0.729793 0.108971 0.479 Uiso 0.698(18) 1 calc R U P A 2
H36E H 0.902839 0.641213 0.115486 0.479 Uiso 0.698(18) 1 calc R U P A 2
H36F H 0.960386 0.663561 0.077326 0.479 Uiso 0.698(18) 1 calc R U P A 2
C37 C 0.6172(3) 0.4219(3) 0.27920(15) 0.0572(12) Uani 1 1 d . . . . .
P1 P 0.60519(8) 0.50893(8) 0.27219(4) 0.0532(3) Uani 1 1 d . . . . .
P2 P 0.47378(8) 0.60733(7) 0.21767(4) 0.0525(3) Uani 1 1 d . . . . .
O1 O 0.6316(2) 0.6515(2) 0.22762(16) 0.0883(13) Uani 1 1 d . . . . .
C38 C 0.6589(3) 0.4142(4) 0.31225(16) 0.0666(14) Uani 1 1 d . . . . .
H38 H 0.681731 0.454326 0.332117 0.080 Uiso 1 1 calc R U . . .
C39 C 0.6668(4) 0.3476(4) 0.31578(18) 0.0764(16) Uani 1 1 d . . . . .
H39 H 0.694128 0.342424 0.338193 0.092 Uiso 1 1 calc R U . . .
C40 C 0.6342(4) 0.2887(4) 0.2863(2) 0.0820(19) Uani 1 1 d . . . . .
H40 H 0.639695 0.243692 0.288693 0.098 Uiso 1 1 calc R U . . .
C41 C 0.5937(5) 0.2960(4) 0.2533(2) 0.093(2) Uani 1 1 d . . . . .
H41 H 0.572640 0.256562 0.232938 0.112 Uiso 1 1 calc R U . . .
C42 C 0.5842(4) 0.3622(4) 0.25025(18) 0.0793(17) Uani 1 1 d . . . . .
H42 H 0.555107 0.366176 0.228332 0.095 Uiso 1 1 calc R U . . .
C43 C 0.6308(3) 0.5583(4) 0.32320(15) 0.0647(14) Uani 1 1 d . . . . .
C44 C 0.5752(4) 0.5183(4) 0.35463(16) 0.0760(16) Uani 1 1 d . . . . .
H44 H 0.529054 0.469904 0.349331 0.091 Uiso 1 1 calc R U . . .
C45 C 0.5901(6) 0.5519(6) 0.3940(2) 0.108(3) Uani 1 1 d . . . . .
H45 H 0.553155 0.526252 0.415044 0.130 Uiso 1 1 calc R U . . .
C46 C 0.6588(6) 0.6228(7) 0.4021(2) 0.119(3) Uani 1 1 d . . . . .
H46 H 0.668243 0.644776 0.428559 0.143 Uiso 1 1 calc R U . . .
C47 C 0.7125(5) 0.6603(5) 0.3715(3) 0.110(3) Uani 1 1 d . . . . .
H47 H 0.758769 0.708323 0.377020 0.132 Uiso 1 1 calc R U . . .
C48 C 0.6995(4) 0.6281(4) 0.33171(19) 0.0837(19) Uani 1 1 d . . . . .
H48 H 0.737437 0.654044 0.311046 0.100 Uiso 1 1 calc R U . . .
C49 C 0.6931(3) 0.5751(3) 0.24122(14) 0.0566(12) Uani 1 1 d . . . . .
C50 C 0.7556(3) 0.5614(4) 0.23300(16) 0.0686(15) Uani 1 1 d . . . . .
H50 H 0.752410 0.514162 0.241907 0.082 Uiso 1 1 calc R U . . .
C51 C 0.8218(4) 0.6163(5) 0.21202(19) 0.0835(19) Uani 1 1 d . . . . .
H51 H 0.862915 0.605772 0.206667 0.100 Uiso 1 1 calc R U . . .
C52 C 0.8285(4) 0.6868(5) 0.1987(2) 0.091(2) Uani 1 1 d . . . . .
H52 H 0.874988 0.724941 0.185742 0.109 Uiso 1 1 calc R U . . .
C53 C 0.7664(4) 0.7007(4) 0.2046(2) 0.089(2) Uani 1 1 d . . . . .
H53 H 0.769668 0.747514 0.194835 0.107 Uiso 1 1 calc R U . . .
C54 C 0.6996(3) 0.6452(3) 0.2251(2) 0.0674(15) Uani 1 1 d . . . . .
C55 C 0.6233(3) 0.7096(3) 0.24739(19) 0.0646(14) Uani 1 1 d . . . . .
C56 C 0.6840(4) 0.7733(3) 0.2682(2) 0.0757(17) Uani 1 1 d . . . . .
H56 H 0.735193 0.780390 0.269255 0.091 Uiso 1 1 calc R U . . .
C57 C 0.6660(4) 0.8269(3) 0.28781(17) 0.0746(16) Uani 1 1 d . . . . .
H57 H 0.706015 0.871042 0.301624 0.090 Uiso 1 1 calc R U . . .
C58 C 0.5894(4) 0.8151(4) 0.28688(15) 0.0700(15) Uani 1 1 d . . . . .
H58 H 0.577607 0.850232 0.300606 0.084 Uiso 1 1 calc R U . . .
C59 C 0.5303(3) 0.7506(3) 0.26538(14) 0.0570(12) Uani 1 1 d . . . . .
H59 H 0.478863 0.743070 0.264480 0.068 Uiso 1 1 calc R U . . .
C60 C 0.5464(3) 0.6975(3) 0.24537(15) 0.0535(12) Uani 1 1 d . . . . .
C61 C 0.3834(3) 0.6148(3) 0.21782(15) 0.0561(12) Uani 1 1 d . . . . .
C62 C 0.3184(3) 0.5593(4) 0.24010(17) 0.0720(16) Uani 1 1 d . . . . .
H62 H 0.321113 0.519103 0.254590 0.086 Uiso 1 1 calc R U . . .
C63 C 0.2491(4) 0.5637(6) 0.2408(2) 0.104(3) Uani 1 1 d . . . . .
H63 H 0.205279 0.525987 0.255752 0.125 Uiso 1 1 calc R U . . .
C64 C 0.2441(5) 0.6220(6) 0.2200(3) 0.112(3) Uani 1 1 d . . . . .
H64 H 0.197195 0.624295 0.220866 0.134 Uiso 1 1 calc R U . . .
C65 C 0.3089(5) 0.6777(5) 0.1977(2) 0.095(2) Uani 1 1 d . . . . .
H65 H 0.305842 0.718075 0.183577 0.114 Uiso 1 1 calc R U . . .
C66 C 0.3768(4) 0.6740(4) 0.1964(2) 0.0795(17) Uani 1 1 d . . . . .
H66 H 0.419957 0.711486 0.180866 0.095 Uiso 1 1 calc R U . . .
C67 C 0.5047(3) 0.6249(3) 0.16332(16) 0.0621(13) Uani 1 1 d . . . . .
C68 C 0.4644(4) 0.5649(3) 0.13584(18) 0.0755(16) Uani 1 1 d . . . . .
H68 H 0.420220 0.517650 0.144684 0.091 Uiso 1 1 calc R U . . .
C69 C 0.4882(5) 0.5728(5) 0.0946(2) 0.096(2) Uani 1 1 d . . . . .
H69 H 0.459109 0.531626 0.075952 0.116 Uiso 1 1 calc R U . . .
C70 C 0.5548(6) 0.6415(5) 0.0814(2) 0.111(3) Uani 1 1 d . U . . .
H70 H 0.572424 0.646177 0.054171 0.134 Uiso 1 1 calc R U . . .
C71 C 0.5944(5) 0.7022(5) 0.1086(2) 0.112(3) Uani 1 1 d . U . . .
H71 H 0.638096 0.749499 0.099334 0.135 Uiso 1 1 calc R U . . .
C72 C 0.5718(4) 0.6959(4) 0.14918(18) 0.0847(18) Uani 1 1 d . . . . .
H72 H 0.600442 0.738152 0.167388 0.102 Uiso 1 1 calc R U . . .
 
loop_
 _atom_site_aniso_label
 _atom_site_aniso_U_11
 _atom_site_aniso_U_22
 _atom_site_aniso_U_33
 _atom_site_aniso_U_23
 _atom_site_aniso_U_13
 _atom_site_aniso_U_12
Ag1 0.0496(2) 0.04555(19) 0.04928(17) -0.00451(15) 0.00162(15) 0.02113(16)
N1 0.049(2) 0.045(2) 0.0419(19) -0.0023(15) 0.0000(16) 0.0275(18)
N2 0.051(2) 0.052(2) 0.0417(18) 0.0016(17) 0.0000(15) 0.0328(19)
N3 0.128(6) 0.145(7) 0.140(6) -0.049(5) 0.072(5) -0.038(5)
N4 0.109(4) 0.063(3) 0.055(3) -0.009(2) -0.003(2) 0.021(3)
C1 0.064(3) 0.047(2) 0.038(2) -0.0039(17) -0.001(2) 0.036(2)
C2 0.072(3) 0.054(3) 0.052(3) -0.014(2) -0.001(2) 0.034(3)
C3 0.065(4) 0.046(3) 0.069(3) -0.016(2) -0.011(3) 0.022(3)
C4 0.056(3) 0.046(3) 0.062(3) -0.007(2) -0.006(2) 0.023(2)
C5 0.050(3) 0.038(2) 0.050(3) 0.0022(19) -0.003(2) 0.025(2)
C6 0.060(3) 0.046(3) 0.084(4) -0.012(3) -0.001(3) 0.007(3)
C7 0.056(3) 0.058(3) 0.088(4) 0.002(3) 0.015(3) 0.010(3)
C8 0.050(3) 0.047(3) 0.046(2) 0.004(2) 0.000(2) 0.030(2)
C9 0.053(3) 0.052(3) 0.061(3) 0.006(2) 0.006(2) 0.024(2)
C10 0.058(3) 0.069(4) 0.071(3) 0.009(3) 0.020(3) 0.025(3)
C11 0.063(3) 0.068(4) 0.054(3) -0.004(3) 0.017(2) 0.027(3)
C12 0.056(3) 0.057(3) 0.043(2) 0.000(2) 0.0039(19) 0.037(2)
C13 0.056(3) 0.058(3) 0.045(3) -0.006(2) 0.000(2) 0.031(2)
C14 0.054(3) 0.066(3) 0.049(3) 0.000(2) 0.007(2) 0.035(3)
C15 0.065(3) 0.064(3) 0.038(2) -0.006(2) 0.001(2) 0.037(3)
C16 0.079(4) 0.066(3) 0.036(2) -0.004(2) 0.005(2) 0.040(3)
C17 0.076(4) 0.064(3) 0.047(3) 0.002(2) 0.009(2) 0.031(3)
C18 0.080(4) 0.065(3) 0.049(3) -0.008(2) 0.001(3) 0.035(3)
C19 0.093(4) 0.079(4) 0.038(3) -0.007(3) 0.004(3) 0.039(3)
C20 0.071(3) 0.070(3) 0.045(3) -0.002(2) 0.009(2) 0.029(3)
C21 0.123(6) 0.076(4) 0.085(4) -0.012(3) -0.012(4) 0.027(4)
C22 0.197(11) 0.080(5) 0.119(7) 0.002(5) 0.006(7) 0.045(6)
C23 0.136(6) 0.073(4) 0.053(3) -0.020(3) -0.011(4) 0.037(4)
C24 0.192(10) 0.113(6) 0.101(5) 0.004(5) -0.046(6) 0.061(7)
C25 0.057(3) 0.049(3) 0.046(3) -0.010(2) -0.002(2) 0.030(2)
C26 0.069(3) 0.053(3) 0.052(3) -0.009(2) -0.002(2) 0.037(3)
C27 0.067(3) 0.051(3) 0.051(3) -0.007(2) 0.007(2) 0.032(3)
C28 0.080(4) 0.060(3) 0.050(3) -0.007(2) 0.013(3) 0.022(3)
C29 0.091(5) 0.091(5) 0.060(3) -0.013(3) 0.021(3) 0.022(4)
C30 0.097(5) 0.101(6) 0.089(5) -0.022(4) 0.029(4) 0.003(4)
C31 0.094(5) 0.084(5) 0.091(4) -0.029(4) 0.026(4) 0.002(4)
C32 0.091(4) 0.070(4) 0.060(3) -0.021(3) 0.017(3) 0.025(3)
C33 0.109(7) 0.145(9) 0.181(9) -0.014(8) 0.038(7) 0.016(6)
C34 0.097(7) 0.167(11) 0.215(13) -0.015(9) 0.047(8) 0.027(7)
C35 0.10(2) 0.145(15) 0.16(3) -0.006(18) 0.02(2) 0.040(18)
C36 0.25(5) 0.21(3) 0.43(7) 0.04(4) -0.06(5) 0.16(4)
C35' 0.124(16) 0.21(2) 0.163(16) -0.045(15) 0.039(10) -0.046(14)
C36' 0.18(2) 0.49(5) 0.22(2) -0.05(3) 0.035(13) 0.11(3)
C37 0.057(3) 0.064(3) 0.052(3) -0.002(2) 0.001(2) 0.032(3)
P1 0.0491(7) 0.0655(8) 0.0487(7) -0.0095(6) -0.0064(5) 0.0314(6)
P2 0.0589(8) 0.0440(7) 0.0581(7) 0.0037(6) 0.0062(6) 0.0283(6)
O1 0.057(2) 0.057(2) 0.151(4) -0.029(3) -0.012(2) 0.029(2)
C38 0.069(4) 0.079(4) 0.057(3) -0.001(3) -0.009(3) 0.041(3)
C39 0.076(4) 0.094(5) 0.070(4) 0.013(3) 0.001(3) 0.051(4)
C40 0.100(5) 0.076(4) 0.089(4) 0.013(4) 0.014(4) 0.059(4)
C41 0.130(6) 0.085(5) 0.081(4) -0.016(3) -0.018(4) 0.066(5)
C42 0.109(5) 0.085(4) 0.061(3) -0.010(3) -0.022(3) 0.062(4)
C43 0.067(3) 0.094(4) 0.053(3) -0.015(3) -0.013(2) 0.055(3)
C44 0.087(4) 0.119(5) 0.056(3) -0.003(3) -0.003(3) 0.077(4)
C45 0.147(7) 0.185(9) 0.060(4) -0.014(5) -0.012(4) 0.134(7)
C46 0.165(9) 0.203(10) 0.063(4) -0.057(6) -0.047(5) 0.149(9)
C47 0.113(6) 0.141(7) 0.097(6) -0.059(5) -0.048(5) 0.080(6)
C48 0.078(4) 0.102(5) 0.077(4) -0.037(4) -0.027(3) 0.049(4)
C49 0.047(3) 0.073(3) 0.050(3) -0.011(2) -0.008(2) 0.030(3)
C50 0.063(3) 0.098(4) 0.057(3) -0.001(3) -0.003(3) 0.048(3)
C51 0.065(4) 0.128(6) 0.072(4) 0.008(4) 0.012(3) 0.060(4)
C52 0.054(4) 0.119(6) 0.089(4) 0.015(4) 0.006(3) 0.035(4)
C53 0.069(4) 0.069(4) 0.116(6) 0.014(4) -0.004(4) 0.025(3)
C54 0.048(3) 0.066(4) 0.088(4) -0.015(3) -0.007(3) 0.028(3)
C55 0.063(3) 0.035(3) 0.091(4) 0.004(3) 0.000(3) 0.020(2)
C56 0.068(4) 0.052(3) 0.099(5) -0.001(3) -0.013(3) 0.024(3)
C57 0.086(4) 0.051(3) 0.069(3) 0.006(3) -0.021(3) 0.020(3)
C58 0.113(5) 0.062(4) 0.049(3) -0.006(3) -0.011(3) 0.054(4)
C59 0.077(4) 0.058(3) 0.049(3) 0.005(2) -0.002(2) 0.044(3)
C60 0.062(3) 0.042(3) 0.058(3) 0.013(2) 0.003(2) 0.027(2)
C61 0.062(3) 0.065(3) 0.049(3) -0.008(2) -0.005(2) 0.037(3)
C62 0.069(4) 0.093(4) 0.060(3) 0.004(3) 0.006(3) 0.046(3)
C63 0.080(5) 0.181(8) 0.075(4) -0.005(5) -0.002(4) 0.083(6)
C64 0.103(6) 0.180(9) 0.103(6) -0.064(6) -0.042(5) 0.109(7)
C65 0.103(6) 0.088(5) 0.122(6) -0.036(5) -0.046(5) 0.069(5)
C66 0.083(4) 0.071(4) 0.094(4) -0.008(3) -0.023(3) 0.045(3)
C67 0.079(4) 0.056(3) 0.062(3) 0.002(2) 0.009(3) 0.042(3)
C68 0.107(5) 0.059(3) 0.076(4) 0.001(3) 0.005(3) 0.053(3)
C69 0.143(7) 0.108(6) 0.071(4) -0.010(4) 0.001(4) 0.087(5)
C70 0.167(8) 0.103(5) 0.076(4) 0.019(4) 0.043(5) 0.076(6)
C71 0.140(8) 0.093(5) 0.088(5) 0.025(4) 0.041(5) 0.047(5)
C72 0.102(5) 0.068(4) 0.069(3) 0.010(3) 0.019(4) 0.031(4)
 
_geom_special_details
;
 All esds (except the esd in the dihedral angle between two l.s. planes)
 are estimated using the full covariance matrix.  The cell esds are taken
 into account individually in the estimation of esds in distances, angles
 and torsion angles; correlations between esds in cell parameters are only
 used when they are defined by crystal symmetry.  An approximate (isotropic)
 treatment of cell esds is used for estimating esds involving l.s. planes.
;
 
loop_
 _geom_bond_atom_site_label_1
 _geom_bond_atom_site_label_2
 _geom_bond_distance
 _geom_bond_site_symmetry_2
 _geom_bond_publ_flag
Ag1 N1 2.362(4) . ?
Ag1 N2 2.377(4) . ?
Ag1 P1 2.5117(14) . ?
Ag1 P2 2.5144(13) . ?
N1 C1 1.337(5) . ?
N1 C5 1.361(6) . ?
N2 C12 1.332(5) . ?
N2 C8 1.367(6) . ?
N3 C30 1.358(9) . ?
N3 C35 1.44(4) . ?
N3 C35' 1.54(2) . ?
N3 C33 1.580(12) . ?
N4 C18 1.368(7) . ?
N4 C21 1.457(8) . ?
N4 C23 1.461(7) . ?
C1 C2 1.417(6) . ?
C1 C25 1.449(7) . ?
C2 C3 1.347(7) . ?
C2 H2 0.9300 . ?
C3 C4 1.422(7) . ?
C3 H3 0.9300 . ?
C4 C5 1.408(6) . ?
C4 C6 1.423(7) . ?
C5 C8 1.443(6) . ?
C6 C7 1.343(8) . ?
C6 H6 0.9300 . ?
C7 C9 1.425(8) . ?
C7 H7 0.9300 . ?
C8 C9 1.398(7) . ?
C9 C10 1.409(7) . ?
C10 C11 1.351(7) . ?
C10 H10 0.9300 . ?
C11 C12 1.405(7) . ?
C11 H11 0.9300 . ?
C12 C13 1.461(7) . ?
C13 C14 1.335(6) . ?
C13 H13 0.9300 . ?
C14 C15 1.442(7) . ?
C14 H14 0.9300 . ?
C15 C20 1.391(6) . ?
C15 C16 1.394(7) . ?
C16 C17 1.354(7) . ?
C16 H16 0.9300 . ?
C17 C18 1.409(7) . ?
C17 H17 0.9300 . ?
C18 C19 1.405(8) . ?
C19 C20 1.376(8) . ?
C19 H19 0.9300 . ?
C20 H20 0.9300 . ?
C21 C22 1.504(11) . ?
C21 H21A 0.9700 . ?
C21 H21B 0.9700 . ?
C22 H22A 0.9600 . ?
C22 H22B 0.9600 . ?
C22 H22C 0.9600 . ?
C23 C24 1.498(10) . ?
C23 H23A 0.9700 . ?
C23 H23B 0.9700 . ?
C24 H24A 0.9600 . ?
C24 H24B 0.9600 . ?
C24 H24C 0.9600 . ?
C25 C26 1.335(6) . ?
C25 H25 0.9300 . ?
C26 C27 1.436(7) . ?
C26 H26 0.9300 . ?
C27 C32 1.382(7) . ?
C27 C28 1.401(6) . ?
C28 C29 1.356(8) . ?
C28 H28 0.9300 . ?
C29 C30 1.411(9) . ?
C29 H29 0.9300 . ?
C30 C31 1.404(9) . ?
C31 C32 1.351(8) . ?
C31 H31 0.9300 . ?
C32 H32 0.9300 . ?
C33 C34 1.400(15) . ?
C33 H33A 0.9700 . ?
C33 H33B 0.9700 . ?
C34 H34A 0.9600 . ?
C34 H34B 0.9600 . ?
C34 H34C 0.9600 . ?
C35 C36 1.23(4) . ?
C35 H35A 0.9700 . ?
C35 H35B 0.9700 . ?
C36 H36A 0.9600 . ?
C36 H36B 0.9600 . ?
C36 H36C 0.9600 . ?
C35' C36' 1.48(3) . ?
C35' H35C 0.9700 . ?
C35' H35D 0.9700 . ?
C36' H36D 0.9600 . ?
C36' H36E 0.9600 . ?
C36' H36F 0.9600 . ?
C37 C42 1.369(8) . ?
C37 C38 1.390(7) . ?
C37 P1 1.822(5) . ?
P1 C49 1.829(5) . ?
P1 C43 1.841(5) . ?
P2 C61 1.824(5) . ?
P2 C67 1.828(5) . ?
P2 C60 1.832(5) . ?
O1 C55 1.369(6) . ?
O1 C54 1.382(6) . ?
C38 C39 1.374(8) . ?
C38 H38 0.9300 . ?
C39 C40 1.371(9) . ?
C39 H39 0.9300 . ?
C40 C41 1.371(9) . ?
C40 H40 0.9300 . ?
C41 C42 1.385(9) . ?
C41 H41 0.9300 . ?
C42 H42 0.9300 . ?
C43 C48 1.368(8) . ?
C43 C44 1.396(8) . ?
C44 C45 1.388(9) . ?
C44 H44 0.9300 . ?
C45 C46 1.373(12) . ?
C45 H45 0.9300 . ?
C46 C47 1.352(12) . ?
C46 H46 0.9300 . ?
C47 C48 1.391(9) . ?
C47 H47 0.9300 . ?
C48 H48 0.9300 . ?
C49 C50 1.386(7) . ?
C49 C54 1.395(8) . ?
C50 C51 1.365(9) . ?
C50 H50 0.9300 . ?
C51 C52 1.371(9) . ?
C51 H51 0.9300 . ?
C52 C53 1.367(9) . ?
C52 H52 0.9300 . ?
C53 C54 1.368(8) . ?
C53 H53 0.9300 . ?
C55 C56 1.378(8) . ?
C55 C60 1.386(7) . ?
C56 C57 1.398(8) . ?
C56 H56 0.9300 . ?
C57 C58 1.380(8) . ?
C57 H57 0.9300 . ?
C58 C59 1.384(8) . ?
C58 H58 0.9300 . ?
C59 C60 1.374(7) . ?
C59 H59 0.9300 . ?
C61 C62 1.377(8) . ?
C61 C66 1.396(8) . ?
C62 C63 1.384(9) . ?
C62 H62 0.9300 . ?
C63 C64 1.355(12) . ?
C63 H63 0.9300 . ?
C64 C65 1.378(11) . ?
C64 H64 0.9300 . ?
C65 C66 1.352(9) . ?
C65 H65 0.9300 . ?
C66 H66 0.9300 . ?
C67 C68 1.355(8) . ?
C67 C72 1.412(8) . ?
C68 C69 1.389(8) . ?
C68 H68 0.9300 . ?
C69 C70 1.376(10) . ?
C69 H69 0.9300 . ?
C70 C71 1.353(10) . ?
C70 H70 0.9300 . ?
C71 C72 1.367(8) . ?
C71 H71 0.9300 . ?
C72 H72 0.9300 . ?
 
loop_
 _geom_angle_atom_site_label_1
 _geom_angle_atom_site_label_2
 _geom_angle_atom_site_label_3
 _geom_angle
 _geom_angle_site_symmetry_1
 _geom_angle_site_symmetry_3
 _geom_angle_publ_flag
N1 Ag1 N2 71.13(12) . . ?
N1 Ag1 P1 114.57(9) . . ?
N2 Ag1 P1 118.83(9) . . ?
N1 Ag1 P2 116.75(9) . . ?
N2 Ag1 P2 113.40(9) . . ?
P1 Ag1 P2 115.11(5) . . ?
C1 N1 C5 119.5(4) . . ?
C1 N1 Ag1 124.8(3) . . ?
C5 N1 Ag1 115.7(3) . . ?
C12 N2 C8 118.9(4) . . ?
C12 N2 Ag1 125.5(3) . . ?
C8 N2 Ag1 115.5(3) . . ?
C30 N3 C35 119(2) . . ?
C30 N3 C35' 120.9(10) . . ?
C30 N3 C33 121.4(7) . . ?
C35 N3 C33 107(2) . . ?
C35' N3 C33 117.2(9) . . ?
C18 N4 C21 121.7(5) . . ?
C18 N4 C23 121.6(5) . . ?
C21 N4 C23 116.5(5) . . ?
N1 C1 C2 121.1(4) . . ?
N1 C1 C25 116.4(4) . . ?
C2 C1 C25 122.5(4) . . ?
C3 C2 C1 119.7(4) . . ?
C3 C2 H2 120.1 . . ?
C1 C2 H2 120.1 . . ?
C2 C3 C4 120.8(4) . . ?
C2 C3 H3 119.6 . . ?
C4 C3 H3 119.6 . . ?
C5 C4 C3 116.4(5) . . ?
C5 C4 C6 120.8(4) . . ?
C3 C4 C6 122.8(5) . . ?
N1 C5 C4 122.5(4) . . ?
N1 C5 C8 119.3(4) . . ?
C4 C5 C8 118.2(4) . . ?
C7 C6 C4 120.5(5) . . ?
C7 C6 H6 119.7 . . ?
C4 C6 H6 119.7 . . ?
C6 C7 C9 120.8(5) . . ?
C6 C7 H7 119.6 . . ?
C9 C7 H7 119.6 . . ?
N2 C8 C9 122.3(4) . . ?
N2 C8 C5 118.3(4) . . ?
C9 C8 C5 119.5(4) . . ?
C8 C9 C10 117.2(5) . . ?
C8 C9 C7 120.3(4) . . ?
C10 C9 C7 122.5(5) . . ?
C11 C10 C9 120.2(5) . . ?
C11 C10 H10 119.9 . . ?
C9 C10 H10 119.9 . . ?
C10 C11 C12 119.8(4) . . ?
C10 C11 H11 120.1 . . ?
C12 C11 H11 120.1 . . ?
N2 C12 C11 121.6(4) . . ?
N2 C12 C13 116.5(4) . . ?
C11 C12 C13 122.0(4) . . ?
C14 C13 C12 126.9(5) . . ?
C14 C13 H13 116.6 . . ?
C12 C13 H13 116.6 . . ?
C13 C14 C15 127.9(5) . . ?
C13 C14 H14 116.0 . . ?
C15 C14 H14 116.0 . . ?
C20 C15 C16 116.0(5) . . ?
C20 C15 C14 120.1(5) . . ?
C16 C15 C14 123.9(4) . . ?
C17 C16 C15 122.5(4) . . ?
C17 C16 H16 118.8 . . ?
C15 C16 H16 118.8 . . ?
C16 C17 C18 122.1(5) . . ?
C16 C17 H17 119.0 . . ?
C18 C17 H17 119.0 . . ?
N4 C18 C19 122.6(5) . . ?
N4 C18 C17 121.6(5) . . ?
C19 C18 C17 115.8(5) . . ?
C20 C19 C18 121.2(5) . . ?
C20 C19 H19 119.4 . . ?
C18 C19 H19 119.4 . . ?
C19 C20 C15 122.5(5) . . ?
C19 C20 H20 118.8 . . ?
C15 C20 H20 118.8 . . ?
N4 C21 C22 113.1(8) . . ?
N4 C21 H21A 109.0 . . ?
C22 C21 H21A 109.0 . . ?
N4 C21 H21B 109.0 . . ?
C22 C21 H21B 109.0 . . ?
H21A C21 H21B 107.8 . . ?
C21 C22 H22A 109.5 . . ?
C21 C22 H22B 109.5 . . ?
H22A C22 H22B 109.5 . . ?
C21 C22 H22C 109.5 . . ?
H22A C22 H22C 109.5 . . ?
H22B C22 H22C 109.5 . . ?
N4 C23 C24 111.4(6) . . ?
N4 C23 H23A 109.4 . . ?
C24 C23 H23A 109.4 . . ?
N4 C23 H23B 109.4 . . ?
C24 C23 H23B 109.4 . . ?
H23A C23 H23B 108.0 . . ?
C23 C24 H24A 109.5 . . ?
C23 C24 H24B 109.5 . . ?
H24A C24 H24B 109.5 . . ?
C23 C24 H24C 109.5 . . ?
H24A C24 H24C 109.5 . . ?
H24B C24 H24C 109.5 . . ?
C26 C25 C1 127.9(4) . . ?
C26 C25 H25 116.1 . . ?
C1 C25 H25 116.1 . . ?
C25 C26 C27 128.9(5) . . ?
C25 C26 H26 115.5 . . ?
C27 C26 H26 115.5 . . ?
C32 C27 C28 115.4(5) . . ?
C32 C27 C26 124.4(4) . . ?
C28 C27 C26 120.1(5) . . ?
C29 C28 C27 121.9(5) . . ?
C29 C28 H28 119.0 . . ?
C27 C28 H28 119.0 . . ?
C28 C29 C30 121.9(5) . . ?
C28 C29 H29 119.0 . . ?
C30 C29 H29 119.0 . . ?
N3 C30 C31 121.5(7) . . ?
N3 C30 C29 122.6(6) . . ?
C31 C30 C29 115.8(6) . . ?
C32 C31 C30 120.8(6) . . ?
C32 C31 H31 119.6 . . ?
C30 C31 H31 119.6 . . ?
C31 C32 C27 124.0(5) . . ?
C31 C32 H32 118.0 . . ?
C27 C32 H32 118.0 . . ?
C34 C33 N3 93.7(11) . . ?
C34 C33 H33A 113.0 . . ?
N3 C33 H33A 113.0 . . ?
C34 C33 H33B 113.0 . . ?
N3 C33 H33B 113.0 . . ?
H33A C33 H33B 110.4 . . ?
C33 C34 H34A 109.5 . . ?
C33 C34 H34B 109.5 . . ?
H34A C34 H34B 109.5 . . ?
C33 C34 H34C 109.5 . . ?
H34A C34 H34C 109.5 . . ?
H34B C34 H34C 109.5 . . ?
C36 C35 N3 150(5) . . ?
C36 C35 H35A 99.2 . . ?
N3 C35 H35A 99.2 . . ?
C36 C35 H35B 99.2 . . ?
N3 C35 H35B 99.2 . . ?
H35A C35 H35B 104.0 . . ?
C35 C36 H36A 109.5 . . ?
C35 C36 H36B 109.5 . . ?
H36A C36 H36B 109.5 . . ?
C35 C36 H36C 109.5 . . ?
H36A C36 H36C 109.5 . . ?
H36B C36 H36C 109.5 . . ?
C36' C35' N3 124(3) . . ?
C36' C35' H35C 106.3 . . ?
N3 C35' H35C 106.3 . . ?
C36' C35' H35D 106.3 . . ?
N3 C35' H35D 106.3 . . ?
H35C C35' H35D 106.4 . . ?
C35' C36' H36D 109.5 . . ?
C35' C36' H36E 109.5 . . ?
H36D C36' H36E 109.5 . . ?
C35' C36' H36F 109.5 . . ?
H36D C36' H36F 109.5 . . ?
H36E C36' H36F 109.5 . . ?
C42 C37 C38 118.8(5) . . ?
C42 C37 P1 118.2(4) . . ?
C38 C37 P1 122.9(4) . . ?
C37 P1 C49 102.2(2) . . ?
C37 P1 C43 104.0(2) . . ?
C49 P1 C43 102.2(2) . . ?
C37 P1 Ag1 117.86(17) . . ?
C49 P1 Ag1 117.01(16) . . ?
C43 P1 Ag1 111.65(16) . . ?
C61 P2 C67 103.0(2) . . ?
C61 P2 C60 103.4(2) . . ?
C67 P2 C60 105.5(2) . . ?
C61 P2 Ag1 120.65(18) . . ?
C67 P2 Ag1 112.41(17) . . ?
C60 P2 Ag1 110.50(15) . . ?
C55 O1 C54 127.4(4) . . ?
C39 C38 C37 120.4(6) . . ?
C39 C38 H38 119.8 . . ?
C37 C38 H38 119.8 . . ?
C40 C39 C38 120.1(6) . . ?
C40 C39 H39 120.0 . . ?
C38 C39 H39 120.0 . . ?
C41 C40 C39 120.1(6) . . ?
C41 C40 H40 119.9 . . ?
C39 C40 H40 119.9 . . ?
C40 C41 C42 119.8(6) . . ?
C40 C41 H41 120.1 . . ?
C42 C41 H41 120.1 . . ?
C37 C42 C41 120.7(6) . . ?
C37 C42 H42 119.6 . . ?
C41 C42 H42 119.6 . . ?
C48 C43 C44 120.0(5) . . ?
C48 C43 P1 124.6(4) . . ?
C44 C43 P1 115.4(4) . . ?
C45 C44 C43 118.8(7) . . ?
C45 C44 H44 120.6 . . ?
C43 C44 H44 120.6 . . ?
C46 C45 C44 120.8(8) . . ?
C46 C45 H45 119.6 . . ?
C44 C45 H45 119.6 . . ?
C47 C46 C45 119.7(7) . . ?
C47 C46 H46 120.2 . . ?
C45 C46 H46 120.2 . . ?
C46 C47 C48 121.0(8) . . ?
C46 C47 H47 119.5 . . ?
C48 C47 H47 119.5 . . ?
C43 C48 C47 119.7(7) . . ?
C43 C48 H48 120.2 . . ?
C47 C48 H48 120.2 . . ?
C50 C49 C54 116.7(5) . . ?
C50 C49 P1 124.3(5) . . ?
C54 C49 P1 118.9(4) . . ?
C51 C50 C49 121.0(6) . . ?
C51 C50 H50 119.5 . . ?
C49 C50 H50 119.5 . . ?
C50 C51 C52 120.9(6) . . ?
C50 C51 H51 119.6 . . ?
C52 C51 H51 119.6 . . ?
C53 C52 C51 119.8(7) . . ?
C53 C52 H52 120.1 . . ?
C51 C52 H52 120.1 . . ?
C52 C53 C54 119.3(7) . . ?
C52 C53 H53 120.4 . . ?
C54 C53 H53 120.4 . . ?
C53 C54 O1 121.7(6) . . ?
C53 C54 C49 122.2(5) . . ?
O1 C54 C49 115.9(5) . . ?
O1 C55 C56 124.3(5) . . ?
O1 C55 C60 113.3(5) . . ?
C56 C55 C60 122.4(6) . . ?
C55 C56 C57 117.8(6) . . ?
C55 C56 H56 121.1 . . ?
C57 C56 H56 121.1 . . ?
C58 C57 C56 120.7(6) . . ?
C58 C57 H57 119.6 . . ?
C56 C57 H57 119.6 . . ?
C57 C58 C59 119.6(6) . . ?
C57 C58 H58 120.2 . . ?
C59 C58 H58 120.2 . . ?
C60 C59 C58 121.0(5) . . ?
C60 C59 H59 119.5 . . ?
C58 C59 H59 119.5 . . ?
C59 C60 C55 118.4(5) . . ?
C59 C60 P2 126.0(4) . . ?
C55 C60 P2 115.5(4) . . ?
C62 C61 C66 118.5(5) . . ?
C62 C61 P2 118.4(4) . . ?
C66 C61 P2 123.1(5) . . ?
C61 C62 C63 119.6(7) . . ?
C61 C62 H62 120.2 . . ?
C63 C62 H62 120.2 . . ?
C64 C63 C62 121.2(8) . . ?
C64 C63 H63 119.4 . . ?
C62 C63 H63 119.4 . . ?
C63 C64 C65 119.6(7) . . ?
C63 C64 H64 120.2 . . ?
C65 C64 H64 120.2 . . ?
C66 C65 C64 120.2(7) . . ?
C66 C65 H65 119.9 . . ?
C64 C65 H65 119.9 . . ?
C65 C66 C61 121.1(7) . . ?
C65 C66 H66 119.5 . . ?
C61 C66 H66 119.5 . . ?
C68 C67 C72 118.5(5) . . ?
C68 C67 P2 118.2(4) . . ?
C72 C67 P2 123.1(4) . . ?
C67 C68 C69 120.9(6) . . ?
C67 C68 H68 119.5 . . ?
C69 C68 H68 119.5 . . ?
C70 C69 C68 120.1(7) . . ?
C70 C69 H69 120.0 . . ?
C68 C69 H69 120.0 . . ?
C71 C70 C69 119.2(7) . . ?
C71 C70 H70 120.4 . . ?
C69 C70 H70 120.4 . . ?
C70 C71 C72 121.7(7) . . ?
C70 C71 H71 119.1 . . ?
C72 C71 H71 119.1 . . ?
C71 C72 C67 119.5(6) . . ?
C71 C72 H72 120.2 . . ?
C67 C72 H72 120.2 . . ?
 
_refine_diff_density_max    0.463
_refine_diff_density_min   -0.352
_refine_diff_density_rms    0.042

# start Validation Reply Form
_vrf_PLAT220_gm7_23_a_sq
;
PROBLEM: NonSolvent   Resd 1  C   Ueq(max)/Ueq(min) Range        7.2 Ratio 
RESPONSE: This alert is generated because there is a significant amount of 
disorder in the structure.
;
_vrf_PLAT232_gm7_23_a_sq
;
PROBLEM: Hirshfeld Test Diff (M-X)  Ag1      --P1       .       13.2 s.u.  
RESPONSE: The assignment of the atom types is correct. The  alert is 
probably due to the size difference between Ag ans P.
;
_vrf_PLAT910_gm7_23_a_sq
;
PROBLEM: Missing # of FCF Reflection(s) Below Theta(Min).         11 Note  
RESPONSE: These reflections are affected by the beamstop.
;
# end Validation Reply Form

_shelx_res_file
;
TITL GM7_23_a.res in P3(1)21
    gm7_23_a_sq.res
    created by SHELXL-2018/3 at 11:15:34 on 28-Mar-2024
CELL  0.71073  19.3283  19.3283  32.2473   90.000   90.000  120.000
ZERR    6.000   0.0040   0.0040   0.0060    0.030    0.030    0.030
LATT -1
SYMM -Y, X-Y, 1/3+Z
SYMM -X+Y, -X, 2/3+Z
SYMM Y, X, -Z
SYMM X-Y, -Y, 2/3-Z
SYMM -X, -X+Y, 1/3-Z
SFAC  C  H  AG  F  N  P  O
UNIT 432 396 6 0 24 12 6
LIST 4 ! automatically inserted. Change 6 to 4 for CHECKCIF!!
ACTA
SIZE 0.400 0.500 0.600
DFIX 1.46 0.05 N3 C35 N3 C35'
DFIX 1.51 0.05 C35 C36 C35' C36'
SIMU 0.04 0.08 N3 C33 C34 C35 C36 C35' C36'
DELU N3 C33 C34 C35 C36 C35' C36'
SIMU 0.04 0.08 C33 C34 C70 C71
DELU C33 C34 C70 C71
L.S. 4 0   78
BOND $H
FMAP 2
PLAN 5
ABIN
WGHT    0.026600    7.067000
FVAR       0.17649   0.30218
AG1   3    0.472515    0.486018    0.246779    11.00000    0.04960    0.04555 =
         0.04928   -0.00451    0.00162    0.02113
REM N^N LIGAND
N1    5    0.395634    0.364660    0.210694    11.00000    0.04910    0.04516 =
         0.04190   -0.00232    0.00005    0.02747
N2    5    0.356042    0.402480    0.286137    11.00000    0.05050    0.05189 =
         0.04170    0.00158   -0.00005    0.03278
N3    5    0.809038    0.633859    0.044013    11.00000    0.12849    0.14484 =
         0.13960   -0.04933    0.07248   -0.03841
N4    5    0.609755    0.826775    0.448189    11.00000    0.10879    0.06277 =
         0.05516   -0.00857   -0.00253    0.02148
C1    1    0.414604    0.347691    0.173688    11.00000    0.06391    0.04678 =
         0.03783   -0.00388   -0.00053    0.03584
C2    1    0.364155    0.273807    0.153798    11.00000    0.07173    0.05427 =
         0.05154   -0.01355   -0.00089    0.03399
AFIX  43
H2    2    0.378115    0.262811    0.128047    11.00000   -1.20000
AFIX   0

C3    1    0.295918    0.219607    0.172356    11.00000    0.06478    0.04561 =
         0.06865   -0.01618   -0.01069    0.02205
AFIX  43
H3    2    0.262637    0.171351    0.159157    11.00000   -1.20000
AFIX   0

C4    1    0.274150    0.235279    0.211887    11.00000    0.05638    0.04614 =
         0.06173   -0.00690   -0.00649    0.02333
C5    1    0.326703    0.310175    0.229594    11.00000    0.05046    0.03776 =
         0.05022    0.00223   -0.00318    0.02476
C6    1    0.202973    0.179731    0.232819    11.00000    0.06039    0.04595 =
         0.08363   -0.01218   -0.00123    0.00700
AFIX  43
H6    2    0.168976    0.130437    0.220752    11.00000   -1.20000
AFIX   0
C7    1    0.184477    0.197892    0.269857    11.00000    0.05632    0.05797 =
         0.08849    0.00211    0.01512    0.00981
AFIX  43
H7    2    0.137691    0.161040    0.283156    11.00000   -1.20000
AFIX   0
C8    1    0.305812    0.329287    0.269214    11.00000    0.05046    0.04738 =
         0.04569    0.00375    0.00039    0.03036
C9    1    0.235673    0.272949    0.289029    11.00000    0.05309    0.05192 =
         0.06089    0.00627    0.00586    0.02392
C10   1    0.218369    0.294237    0.327852    11.00000    0.05781    0.06941 =
         0.07058    0.00913    0.02001    0.02517
AFIX  43
H10   2    0.172297    0.258455    0.342045    11.00000   -1.20000
AFIX   0
C11   1    0.268541    0.366489    0.344494    11.00000    0.06259    0.06830 =
         0.05434   -0.00359    0.01671    0.02743
AFIX  43
H11   2    0.257161    0.380404    0.370160    11.00000   -1.20000
AFIX   0
C12   1    0.337991    0.420589    0.322926    11.00000    0.05598    0.05700 =
         0.04251    0.00017    0.00385    0.03697
C13   1    0.393593    0.499827    0.339303    11.00000    0.05592    0.05804 =
         0.04485   -0.00555    0.00036    0.03055
AFIX  43
H13   2    0.431622    0.535912    0.320936    11.00000   -1.20000
AFIX   0
C14   1    0.395572    0.525906    0.377861    11.00000    0.05362    0.06606 =
         0.04885    0.00007    0.00720    0.03472
AFIX  43
H14   2    0.357056    0.489621    0.395967    11.00000   -1.20000
AFIX   0
C15   1    0.450140    0.603464    0.394856    11.00000    0.06493    0.06438 =
         0.03815   -0.00577    0.00118    0.03703
C16   1    0.509942    0.665936    0.371944    11.00000    0.07869    0.06585 =
         0.03600   -0.00390    0.00536    0.04002
AFIX  43
H16   2    0.514852    0.657998    0.343900    11.00000   -1.20000
AFIX   0
C17   1    0.561133    0.737718    0.388986    11.00000    0.07609    0.06401 =
         0.04662    0.00224    0.00928    0.03134
AFIX  43
H17   2    0.599756    0.777458    0.372257    11.00000   -1.20000
AFIX   0
C18   1    0.557711    0.754082    0.431268    11.00000    0.08007    0.06498 =
         0.04891   -0.00838    0.00094    0.03536
C19   1    0.496937    0.691766    0.454460    11.00000    0.09258    0.07912 =
         0.03808   -0.00746    0.00370    0.03872
AFIX  43
H19   2    0.491528    0.699588    0.482460    11.00000   -1.20000
AFIX   0
C20   1    0.445306    0.619406    0.436485    11.00000    0.07126    0.07031 =
         0.04477   -0.00247    0.00925    0.02877
AFIX  43
H20   2    0.405673    0.579644    0.452781    11.00000   -1.20000
AFIX   0
C21   1    0.675144    0.889008    0.424194    11.00000    0.12256    0.07628 =
         0.08507   -0.01155   -0.01225    0.02701
AFIX  23
H21A  2    0.695288    0.864304    0.405194    11.00000   -1.20000
H21B  2    0.718226    0.922931    0.442893    11.00000   -1.20000
AFIX   0
C22   1    0.650923    0.939862    0.399869    11.00000    0.19727    0.07991 =
         0.11865    0.00200    0.00566    0.04519
AFIX 137
H22A  2    0.695792    0.978855    0.384207    11.00000   -1.50000
H22B  2    0.633267    0.966514    0.418577    11.00000   -1.50000
H22C  2    0.608244    0.906686    0.381291    11.00000   -1.50000
AFIX   0
C23   1    0.607424    0.843094    0.492265    11.00000    0.13642    0.07254 =
         0.05300   -0.01958   -0.01058    0.03677
AFIX  23
H23A  2    0.552383    0.815975    0.501673    11.00000   -1.20000
H23B  2    0.629249    0.900015    0.496268    11.00000   -1.20000
AFIX   0
C24   1    0.654215    0.815696    0.517585    11.00000    0.19165    0.11257 =
         0.10063    0.00384   -0.04607    0.06119
AFIX 137
H24A  2    0.632359    0.759266    0.513879    11.00000   -1.50000
H24B  2    0.651282    0.826840    0.546339    11.00000   -1.50000
H24C  2    0.708989    0.843423    0.508763    11.00000   -1.50000
AFIX   0
C25   1    0.489518    0.407963    0.155836    11.00000    0.05690    0.04881 =
         0.04650   -0.00989   -0.00173    0.02959
AFIX  43
H25   2    0.521886    0.451009    0.172872    11.00000   -1.20000
AFIX   0
C26   1    0.517712    0.409194    0.117895    11.00000    0.06920    0.05268 =
         0.05194   -0.00862   -0.00228    0.03658
AFIX  43
H26   2    0.484983    0.365945    0.101059    11.00000   -1.20000
AFIX   0
C27   1    0.591617    0.468088    0.099475    11.00000    0.06727    0.05059 =
         0.05089   -0.00678    0.00664    0.03167
C28   1    0.611737    0.456748    0.059288    11.00000    0.07963    0.05966 =
         0.04986   -0.00726    0.01328    0.02176
AFIX  43
H28   2    0.576227    0.411128    0.044692    11.00000   -1.20000
AFIX   0
C29   1    0.681474    0.510351    0.041058    11.00000    0.09095    0.09050 =
         0.05989   -0.01287    0.02094    0.02205
AFIX  43
H29   2    0.691564    0.501330    0.013980    11.00000   -1.20000
AFIX   0
C30   1    0.739171    0.579399    0.061962    11.00000    0.09698    0.10077 =
         0.08879   -0.02176    0.02945    0.00278
C31   1    0.718937    0.590133    0.102315    11.00000    0.09362    0.08419 =
         0.09060   -0.02926    0.02632    0.00225
AFIX  43
H31   2    0.754203    0.635228    0.117338    11.00000   -1.20000
AFIX   0
C32   1    0.648885    0.535791    0.119608    11.00000    0.09131    0.07009 =
         0.06029   -0.02090    0.01733    0.02481
AFIX  43
H32   2    0.638568    0.544463    0.146707    11.00000   -1.20000
AFIX   0
C33   1    0.826893    0.627336   -0.003188    11.00000    0.10940    0.14546 =
         0.18118   -0.01381    0.03840    0.01608
AFIX  23
H33A  2    0.778984    0.601940   -0.020088    11.00000   -1.20000
H33B  2    0.865677    0.678249   -0.015129    11.00000   -1.20000
AFIX   0
C34   1    0.858485    0.577447    0.004851    11.00000    0.09663    0.16727 =
         0.21450   -0.01465    0.04651    0.02666
AFIX 137
H34A  2    0.868383    0.558949   -0.020885    11.00000   -1.50000
H34B  2    0.821077    0.532513    0.021038    11.00000   -1.50000
H34C  2    0.907666    0.606658    0.019913    11.00000   -1.50000
AFIX   0
PART 1
C35   1    0.841453    0.717527    0.052940    21.00000    0.10146    0.14508 =
         0.16478   -0.00586    0.02400    0.04035
AFIX  23
H35A  2    0.873535    0.722009    0.077013    21.00000   -1.20000
H35B  2    0.880010    0.740021    0.030568    21.00000   -1.20000
AFIX   0
C36   1    0.831344    0.774509    0.059650    21.00000    0.25150    0.20546 =
         0.43226    0.04348   -0.05911    0.16202
AFIX  33
H36A  2    0.882135    0.821770    0.064056    21.00000   -1.50000
H36B  2    0.805324    0.782350    0.036248    21.00000   -1.50000
H36C  2    0.798684    0.763878    0.083882    21.00000   -1.50000
AFIX   0
PART 2
C35'  1    0.878080    0.697492    0.070306   -21.00000    0.12373    0.20620 =
         0.16275   -0.04544    0.03915   -0.04559
AFIX  23
H35C  2    0.911393    0.740723    0.051542   -21.00000   -1.20000
H35D  2    0.854355    0.718573    0.089365   -21.00000   -1.20000
AFIX   0
C36'  1    0.932917    0.681623    0.095206   -21.00000    0.18042    0.48821 =
         0.21623   -0.05371    0.03480    0.11245
AFIX  33
H36D  2    0.971119    0.729793    0.108971   -21.00000   -1.50000
H36E  2    0.902839    0.641213    0.115486   -21.00000   -1.50000
H36F  2    0.960386    0.663561    0.077326   -21.00000   -1.50000
AFIX   0
PART 0
C37   1    0.617173    0.421945    0.279199    11.00000    0.05693    0.06419 =
         0.05222   -0.00166    0.00057    0.03156
REM DIPHOSPHINE LIGAND
P1    6    0.605193    0.508926    0.272191    11.00000    0.04908    0.06547 =
         0.04870   -0.00954   -0.00638    0.03140
P2    6    0.473784    0.607332    0.217670    11.00000    0.05887    0.04402 =
         0.05810    0.00366    0.00618    0.02834
O1    7    0.631621    0.651538    0.227621    11.00000    0.05713    0.05712 =
         0.15123   -0.02927   -0.01184    0.02902
C38   1    0.658929    0.414173    0.312251    11.00000    0.06909    0.07937 =
         0.05697   -0.00113   -0.00909    0.04125
AFIX  43
H38   2    0.681731    0.454326    0.332117    11.00000   -1.20000
AFIX   0
C39   1    0.666752    0.347567    0.315779    11.00000    0.07594    0.09443 =
         0.06973    0.01283    0.00078    0.05069
AFIX  43
H39   2    0.694128    0.342424    0.338193    11.00000   -1.20000
AFIX   0
C40   1    0.634233    0.288675    0.286284    11.00000    0.10042    0.07628 =
         0.08854    0.01347    0.01388    0.05864
AFIX  43
H40   2    0.639695    0.243692    0.288693    11.00000   -1.20000
AFIX   0
C41   1    0.593694    0.295961    0.253256    11.00000    0.12973    0.08482 =
         0.08085   -0.01572   -0.01850    0.06580
AFIX  43
H41   2    0.572640    0.256562    0.232938    11.00000   -1.20000
AFIX   0
C42   1    0.584201    0.362213    0.250253    11.00000    0.10888    0.08518 =
         0.06120   -0.01050   -0.02187    0.06155
AFIX  43
H42   2    0.555107    0.366176    0.228332    11.00000   -1.20000
AFIX   0
C43   1    0.630772    0.558260    0.323198    11.00000    0.06737    0.09378 =
         0.05295   -0.01545   -0.01299    0.05526
C44   1    0.575218    0.518257    0.354632    11.00000    0.08720    0.11867 =
         0.05592   -0.00256   -0.00321    0.07676
AFIX  43
H44   2    0.529054    0.469904    0.349331    11.00000   -1.20000
AFIX   0
C45   1    0.590118    0.551950    0.393952    11.00000    0.14720    0.18517 =
         0.06012   -0.01351   -0.01179    0.13360
AFIX  43
H45   2    0.553155    0.526252    0.415044    11.00000   -1.20000
AFIX   0
C46   1    0.658759    0.622758    0.402097    11.00000    0.16548    0.20342 =
         0.06318   -0.05747   -0.04650    0.14900
AFIX  43
H46   2    0.668243    0.644776    0.428559    11.00000   -1.20000
AFIX   0
C47   1    0.712450    0.660269    0.371450    11.00000    0.11313    0.14123 =
         0.09745   -0.05855   -0.04817    0.07964
AFIX  43
H47   2    0.758769    0.708323    0.377020    11.00000   -1.20000
AFIX   0
C48   1    0.699528    0.628144    0.331714    11.00000    0.07762    0.10209 =
         0.07681   -0.03703   -0.02684    0.04903
AFIX  43
H48   2    0.737437    0.654044    0.311046    11.00000   -1.20000
AFIX   0
C49   1    0.693070    0.575145    0.241221    11.00000    0.04695    0.07294 =
         0.05037   -0.01122   -0.00814    0.03040
C50   1    0.755608    0.561439    0.232997    11.00000    0.06260    0.09751 =
         0.05652   -0.00114   -0.00283    0.04815
AFIX  43
H50   2    0.752410    0.514162    0.241907    11.00000   -1.20000
AFIX   0
C51   1    0.821793    0.616311    0.212019    11.00000    0.06514    0.12785 =
         0.07250    0.00823    0.01170    0.05956
AFIX  43
H51   2    0.862915    0.605772    0.206667    11.00000   -1.20000
AFIX   0
C52   1    0.828456    0.686780    0.198728    11.00000    0.05369    0.11935 =
         0.08889    0.01509    0.00585    0.03460
AFIX  43
H52   2    0.874988    0.724941    0.185742    11.00000   -1.20000
AFIX   0
C53   1    0.766446    0.700736    0.204635    11.00000    0.06878    0.06916 =
         0.11627    0.01388   -0.00354    0.02455
AFIX  43
H53   2    0.769668    0.747514    0.194835    11.00000   -1.20000
AFIX   0
C54   1    0.699593    0.645150    0.225119    11.00000    0.04835    0.06584 =
         0.08752   -0.01522   -0.00659    0.02811
C55   1    0.623301    0.709640    0.247390    11.00000    0.06267    0.03469 =
         0.09110    0.00447   -0.00009    0.02024
C56   1    0.683960    0.773312    0.268241    11.00000    0.06811    0.05210 =
         0.09855   -0.00133   -0.01264    0.02385
AFIX  43
H56   2    0.735193    0.780390    0.269255    11.00000   -1.20000
AFIX   0
C57   1    0.665959    0.826910    0.287814    11.00000    0.08556    0.05056 =
         0.06876    0.00568   -0.02059    0.01980
AFIX  43
H57   2    0.706015    0.871042    0.301624    11.00000   -1.20000
AFIX   0
C58   1    0.589404    0.815070    0.286876    11.00000    0.11262    0.06185 =
         0.04916   -0.00634   -0.01140    0.05389
AFIX  43
H58   2    0.577607    0.850232    0.300606    11.00000   -1.20000
AFIX   0
C59   1    0.530262    0.750562    0.265384    11.00000    0.07671    0.05843 =
         0.04929    0.00522   -0.00208    0.04381
AFIX  43
H59   2    0.478863    0.743070    0.264480    11.00000   -1.20000
AFIX   0
C60   1    0.546386    0.697456    0.245374    11.00000    0.06224    0.04168 =
         0.05750    0.01267    0.00274    0.02662
C61   1    0.383357    0.614791    0.217818    11.00000    0.06209    0.06472 =
         0.04864   -0.00836   -0.00542    0.03705
C62   1    0.318426    0.559293    0.240097    11.00000    0.06947    0.09323 =
         0.05986    0.00377    0.00647    0.04556
AFIX  43
H62   2    0.321113    0.519103    0.254590    11.00000   -1.20000
AFIX   0
C63   1    0.249142    0.563693    0.240787    11.00000    0.07988    0.18065 =
         0.07500   -0.00472   -0.00211    0.08260
AFIX  43
H63   2    0.205279    0.525987    0.255752    11.00000   -1.20000
AFIX   0
C64   1    0.244084    0.621965    0.220046    11.00000    0.10265    0.18017 =
         0.10255   -0.06378   -0.04189    0.10873
AFIX  43
H64   2    0.197195    0.624295    0.220866    11.00000   -1.20000
AFIX   0
C65   1    0.308871    0.677748    0.197730    11.00000    0.10337    0.08843 =
         0.12202   -0.03591   -0.04601    0.06921
AFIX  43
H65   2    0.305842    0.718075    0.183577    11.00000   -1.20000
AFIX   0
C66   1    0.376850    0.674008    0.196356    11.00000    0.08314    0.07051 =
         0.09405   -0.00794   -0.02278    0.04526
AFIX  43
H66   2    0.419957    0.711486    0.180866    11.00000   -1.20000
AFIX   0
C67   1    0.504744    0.624945    0.163316    11.00000    0.07888    0.05639 =
         0.06173    0.00153    0.00854    0.04186
C68   1    0.464441    0.564872    0.135836    11.00000    0.10670    0.05936 =
         0.07624    0.00077    0.00543    0.05346
AFIX  43
H68   2    0.420220    0.517650    0.144684    11.00000   -1.20000
AFIX   0
C69   1    0.488232    0.572807    0.094624    11.00000    0.14291    0.10806 =
         0.07072   -0.01002    0.00146    0.08742
AFIX  43
H69   2    0.459109    0.531626    0.075952    11.00000   -1.20000
AFIX   0
C70   1    0.554824    0.641518    0.081412    11.00000    0.16716    0.10298 =
         0.07564    0.01944    0.04341    0.07641
AFIX  43
H70   2    0.572424    0.646177    0.054171    11.00000   -1.20000
AFIX   0
C71   1    0.594390    0.702239    0.108560    11.00000    0.14036    0.09284 =
         0.08787    0.02514    0.04093    0.04685
AFIX  43
H71   2    0.638096    0.749499    0.099334    11.00000   -1.20000
AFIX   0
C72   1    0.571812    0.695945    0.149184    11.00000    0.10223    0.06754 =
         0.06857    0.00988    0.01887    0.03072
AFIX  43
H72   2    0.600442    0.738152    0.167388    11.00000   -1.20000
AFIX   0
HKLF 4


REM  GM7_23_a.res in P3(1)21
REM wR2 = 0.0864, GooF = S = 1.079, Restrained GooF = 1.082 for all data
REM R1 = 0.0366 for 11128 Fo > 4sig(Fo) and 0.0444 for all 12286 data
REM 743 parameters refined using 64 restraints

END

WGHT      0.0266      7.0680

REM Highest difference peak  0.463,  deepest hole -0.352,  1-sigma level  0.042
Q1    1   0.4193  0.4857  0.2454  11.00000  0.05    0.46
Q2    1   0.4685  0.5367  0.2488  11.00000  0.05    0.41
Q3    1   0.4725  0.4347  0.2522  11.00000  0.05    0.39
Q4    1   0.5216  0.4804  0.2403  11.00000  0.05    0.32
Q5    1   0.3582  0.3587  0.2752  11.00000  0.05    0.30
;
_shelx_res_checksum   97768

_shelx_hkl_file
;
   1   2   0 1211.58   38.90
   2  -3   0 1067.39   38.80
   2  -3   0 1264.67   38.90
  -3   1   0 1023.90   39.00
   1   2   0 1012.20   38.80
  -3   1   0 1205.58   38.80
   3  -1   0 1249.47   39.00
  -2   3   0 1189.48   38.80
  -2   3   0 1213.28   38.90
  -2   3   0 1032.10   38.90
  -1  -2   0 1153.38   38.80
  -1  -2   0 1207.28   38.90
  -3   2   0 1258.07   40.90
  -3   2   0 1230.58   41.40
  -3   2   0 1256.27   40.80
   1  -3   0 1151.88   40.80
   1  -3   0 1223.38   40.90
   2   1   0 1257.67   40.90
  -2  -1   0 1183.68   40.90
   3  -2   0 1224.08   41.00
  -1   3   0 1160.98   41.00
  -2  -1   0 1211.38   40.90
  -1   3   0 1174.68   40.80
   0  -3   0  179.08    6.40
   3   0   0  184.18    6.50
  -3   3   0  183.38    6.30
  -3   3   0  185.08    6.40
  -3   3   0  184.78    6.40
   3   0   0  168.38    6.40
   0  -3   0  185.38    6.40
   3   0   0  172.48    6.40
  -3   3   0  190.18    6.30
   0  -3   0  185.78    6.30
  -3   0   0  183.08    6.40
   0   3   0  170.78    6.30
   0   3   0  188.68    6.40
   3  -3   0  165.38    6.30
   0   3   0  181.98    6.30
  -3   0   0  180.68    6.40
  -3   0   0  181.18    6.50
   3  -3   0  183.88    6.30
   3  -3   0  189.58    6.50
   3  -4   0  636.44   20.50
   1   3   0  601.94   20.40
   1   3   0  628.04   20.50
  -4   1   0  627.04   20.50
  -4   1   0  629.74   20.60
   1   3   0  614.24   20.50
   3  -4   0  610.54   20.40
   3  -4   0  602.44   20.40
  -4   1   0  603.94   20.40
   4  -1   0  588.04   20.50
  -1  -3   0  582.34   20.50
   4  -1   0  607.44   20.60
  -3   4   0  584.54   20.50
  -1  -3   0  576.04   20.40
  -1  -3   0  577.24   20.40
  -3   4   0  563.34   20.40
  -3   4   0  584.34   20.40
   4  -1   0  576.24   20.40
   2   2   0 4388.56  151.48
   2  -4   0 4534.95  150.68
  -4   2   0 4352.76  151.98
  -2  -2   0 4171.18  151.38
  -2   4   0 4447.46  150.48
   4  -2   0 4119.09  151.68
   3   1   0  616.84   20.90
  -4   3   0  644.04   21.00
   1  -4   0  617.14   20.80
  -4   3   0  627.14   20.90
  -4   3   0  648.54   21.00
   3   1   0  620.34   20.90
   1  -4   0  635.64   20.80
   1  -4   0  625.34   20.80
  -4   3   0  624.54   20.70
   3   1   0  621.34   20.90
  -1   4   0  570.14   20.70
   4  -3   0  602.54   20.90
  -1   4   0  589.84   20.80
  -3  -1   0  564.44   20.80
   4  -3   0  602.84   21.00
  -3  -1   0  607.54   21.50
  -3  -1   0  575.64   20.90
  -4   4   0  258.27    8.60
   0  -4   0  241.98    8.80
   0  -4   0  254.67    8.80
  -4   4   0  249.58    8.80
   4   0   0  251.97    8.80
   4   0   0  251.37    8.80
  -4   4   0  242.38    8.80
   4   0   0  252.17    8.90
   0  -4   0  250.67    8.70
  -4   0   0  250.47    8.90
   4  -4   0  257.77    8.70
  -4   0   0  248.98    8.70
   0   4   0  244.68    8.70
   0   4   0  246.28    8.80
   0   4   0  247.28    8.80
   4  -4   0  244.28    8.90
  -4   0   0  249.18    8.80
  -5   1   0  397.96   14.40
   1   4   0  394.46   14.30
   4  -5   0  396.96   14.20
   4  -5   0  383.16   14.50
   4  -5   0  400.66   14.40
  -5   1   0  387.46   14.30
   1   4   0  395.86   14.30
  -5   1   0  386.96   14.40
   1   4   0  396.96   14.30
  -1  -4   0  441.86   15.00
   5  -1   0  429.16   14.30
   5  -1   0  432.96   14.40
  -4   5   0  429.86   14.30
  -4   5   0  423.86   14.40
  -1  -4   0  442.36   14.60
  -1  -4   0  432.26   14.30
  -4   5   0  441.56   14.20
   5  -1   0  433.46   14.50
   3  -5   0 1494.85   49.40
  -5   2   0 1441.36   49.70
   2   3   0 1503.75   49.60
   3  -5   0 1458.75   49.70
   2   3   0 1471.95   49.50
   3  -5   0 1420.56   49.50
   2   3   0 1494.65   49.60
  -5   2   0 1438.46   49.40
  -5   2   0 1501.75   49.60
  -2  -3   0 1455.05   50.09
  -3   5   0 1402.16   49.50
  -3   5   0 1452.15   49.50
  -2  -3   0 1417.36   49.50
   5  -2   0 1477.05   49.50
  -3   5   0 1468.45   49.30
   5  -2   0 1508.65   49.60
   5  -2   0 1504.65   49.70
  -2  -3   0 1462.25   49.50
   2  -5   0 1506.25   49.70
  -5   3   0 1541.95   49.90
  -5   3   0 1488.55   49.80
  -5   3   0 1492.45   49.70
   3   2   0 1482.75   49.90
   2  -5   0 1485.15   49.80
   2  -5   0 1433.26   49.80
   3   2   0 1513.25   49.80
  -5   3   0 1443.56   49.90
   3   2   0 1487.05   49.80
   5  -3   0 1484.95   49.80
   5  -3   0 1437.66   49.90
  -2   5   0 1409.76   49.70
  -3  -2   0 1442.16   49.80
   5  -3   0 1486.85   49.70
  -2   5   0 1452.45   49.70
  -3  -2   0 1465.35   50.09
  -3  -2   0 1477.55   49.80
  -2   5   0 1451.05   49.60
   1  -5   0  396.76   14.10
   4   1   0  398.36   14.20
   4   1   0  407.76   14.30
  -5   4   0  398.46   14.00
  -5   4   0  400.26   14.30
  -5   4   0  394.46   14.20
   1  -5   0  385.16   14.40
   1  -5   0  391.66   14.20
  -5   4   0  403.56   14.20
   4   1   0  399.86   14.30
   5  -4   0  430.56   14.10
  -1   5   0  429.76   14.20
   5  -4   0  420.16   14.40
  -4  -1   0  430.76   14.30
  -1   5   0  419.56   14.20
  -1   5   0  421.06   14.10
  -4  -1   0  424.26   14.40
   5  -4   0  428.36   14.20
  -4  -1   0  413.46   14.20
  -5   5   0   24.50    1.30
   5   0   0   22.50    1.50
  -5   5   0   26.90    1.30
  -5   5   0   26.60    1.50
   5   0   0   25.80    1.70
   5   0   0   24.60    1.50
   0  -5   0   26.30    1.50
  -5   5   0   24.00    1.50
   5  -5   0   23.60    1.40
   0   5   0   27.40    1.60
  -5   0   0   24.80    1.60
   5  -5   0   25.90    1.40
   5  -5   0   25.50    1.60
  -5   0   0   20.80    2.20
   0   5   0   27.60    1.50
  -5   0   0   25.60    1.60
   1   5   0  288.47    9.90
  -6   1   0  282.37   10.10
   5  -6   0  289.47    9.80
   5  -6   0  286.67    9.90
  -6   1   0  283.47   10.10
  -6   1   0  294.97   10.00
   1   5   0  291.07    9.90
   1   5   0  286.77    9.90
   6  -1   0  270.67    9.90
   6  -1   0  274.47   10.00
   6  -1   0  281.17   10.10
  -1  -5   0  272.87    9.90
  -5   6   0  268.37    9.90
  -5   6   0  270.77    9.70
  -5   6   0  265.07    9.90
  -1  -5   0  268.67    9.80
  -1  -5   0  262.37    9.90
  -6   2   0  333.37   11.50
  -6   2   0  323.37   11.10
   4  -6   0  334.07   10.90
   2   4   0  328.77   10.90
   2   4   0  330.17   11.00
   4  -6   0  332.97   10.80
   2   4   0  336.87   11.00
  -6   2   0  337.67   11.00
   4  -6   0  314.77   11.30
  -2  -4   0  288.17   10.80
   6  -2   0  298.97   11.10
   6  -2   0  287.87   10.90
   6  -2   0  295.47   10.80
  -4   6   0  286.97   10.80
  -4   6   0  281.27   10.90
  -4   6   0  292.17   10.70
  -2  -4   0  281.77   10.90
  -2  -4   0  287.27   11.10
   3  -6   0  577.14   19.70
   3  -6   0  580.84   19.40
   3  -6   0  567.84   19.80
  -6   3   0  576.84   19.40
  -6   3   0  597.74   19.70
   3   3   0  581.54   19.60
   3   3   0  584.64   19.60
  -6   3   0  601.04   19.80
   3   3   0  591.94   19.70
   6  -3   0  559.94   19.50
  -3   6   0  548.55   19.30
   6  -3   0  562.94   19.60
  -3   6   0  546.05   19.50
   6  -3   0  580.24   19.80
  -3  -3   0  539.65   19.60
  -3  -3   0  541.15   19.50
  -3   6   0  548.85   19.50
  -3  -3   0  541.65   19.60
   4   2   0  326.17   11.10
   4   2   0  333.07   11.00
   2  -6   0  339.67   11.30
  -6   4   0  332.17   11.10
   4   2   0  337.67   11.10
  -6   4   0  346.17   11.10
  -6   4   0  321.07   11.20
  -6   4   0  337.77   10.90
   2  -6   0  341.57   10.90
  -4  -2   0  283.87   10.90
  -2   6   0  288.17   10.90
  -2   6   0  285.37   10.90
  -2   6   0  288.97   10.80
   6  -4   0  299.17   10.90
   6  -4   0  295.87   11.20
   6  -4   0  288.17   11.00
  -4  -2   0  286.87   11.00
  -4  -2   0  285.27   11.10
  -6   5   0  291.17    9.80
  -6   5   0  298.97   10.00
   5   1   0  282.37   10.00
   1  -6   0  294.87   10.00
   1  -6   0  280.47   10.10
   1  -6   0  282.97   10.00
  -6   5   0  291.27   10.10
  -6   5   0  290.77   10.10
   5   1   0  299.27   10.10
   5   1   0  284.77   10.20
  -1   6   0  273.27   10.00
   6  -5   0  274.67   10.20
  -1   6   0  269.27    9.90
   6  -5   0  275.57   10.00
  -5  -1   0  274.07   10.10
  -5  -1   0  266.47   10.00
  -5  -1   0  265.27   10.10
  -1   6   0  275.07   10.00
   0  -6   0  768.62   26.00
  -6   6   0  768.22   26.10
   0  -6   0  780.42   26.70
   6   0   0  771.52   26.00
  -6   6   0  773.22   25.80
  -6   6   0  749.42   25.80
   0  -6   0  739.13   26.00
   6   0   0  758.82   26.10
   6   0   0  763.42   26.20
  -6   6   0  762.52   26.10
   0   6   0  753.52   26.00
   6  -6   0  737.53   26.00
  -6   0   0  733.03   26.30
   0   6   0  756.42   25.90
   6  -6   0  771.22   26.30
  -6   0   0  738.03   26.00
   0   6   0  765.12   26.00
   6  -6   0  767.52   25.90
  -6   0   0  759.62   26.20
   1   6   0  118.29    4.90
   6  -7   0  121.89    4.80
   6  -7   0  128.89    5.50
  -7   1   0  124.49    5.20
  -7   1   0  121.29    5.80
   1   6   0  116.59    4.90
   1   6   0  121.09    4.90
   6  -7   0  120.39    4.90
  -7   1   0  111.69    4.80
  -6   7   0  139.59    5.10
  -6   7   0  136.29    4.70
   7  -1   0  134.19    5.20
  -1  -6   0  128.19    4.90
  -6   7   0  134.69    5.00
   7  -1   0  135.09    5.10
  -1  -6   0  132.89    5.00
  -1  -6   0  135.49    5.10
   7  -1   0  129.19    5.00
  -7   2   0  123.59    5.00
   2   5   0  123.49    4.80
  -7   2   0  130.59    4.90
   2   5   0  123.19    4.80
   5  -7   0  123.89    4.60
  -7   2   0  123.09    4.70
   5  -7   0  121.49    5.70
   2   5   0  125.79    4.80
   5  -7   0  125.69    4.70
   7  -2   0  120.09    4.80
  -5   7   0  119.49    4.80
  -2  -5   0  123.99    4.90
  -5   7   0  118.29    4.50
  -5   7   0  120.89    4.70
  -2  -5   0  123.09    5.50
  -2  -5   0  113.09    4.70
   7  -2   0  122.69    4.80
   7  -2   0  120.49    5.00
  -7   3   0  319.07   11.30
   4  -7   0  326.67   11.30
  -7   3   0  330.47   11.70
   4  -7   0  319.27   11.40
   3   4   0  321.97   11.40
   3   4   0  336.87   11.50
  -7   3   0  328.47   11.50
   3   4   0  321.97   11.50
   7  -3   0  327.57   11.50
  -4   7   0  317.57   11.40
  -3  -4   0  316.67   11.40
   7  -3   0  321.07   11.70
  -3  -4   0  318.17   11.50
  -3  -4   0  317.47   11.50
  -4   7   0  326.87   11.40
   7  -3   0  324.37   11.40
  -4   7   0  315.27   11.20
   4   3   0  328.57   11.50
  -7   4   0  339.17   11.60
   3  -7   0  324.67   11.30
  -7   4   0  323.17   11.30
  -7   4   0  319.87   11.60
   4   3   0  332.87   11.60
   4   3   0  319.27   11.40
   3  -7   0  325.47   11.40
  -7   4   0  329.17   11.60
  -4  -3   0  313.97   11.40
  -4  -3   0  321.37   11.50
   7  -4   0  326.07   11.50
  -3   7   0  318.67   11.40
   7  -4   0  324.27   11.80
   7  -4   0  320.87   11.30
  -4  -3   0  312.67   11.60
  -3   7   0  312.17   11.20
  -3   7   0  318.27   11.40
  -7   5   0  127.59    4.90
   5   2   0  125.49    4.90
   5   2   0  127.59    5.00
   2  -7   0  129.29    4.80
  -7   5   0  127.69    4.60
  -7   5   0  132.59    4.90
   5   2   0  125.09    4.90
  -7   5   0  125.69    5.00
   2  -7   0  125.69    5.00
   2  -7   0  130.29    4.80
  -5  -2   0  115.49    4.80
  -5  -2   0  117.09    5.00
  -2   7   0  115.99    4.60
  -2   7   0  119.89    4.80
  -2   7   0  121.69    4.80
   7  -5   0  121.19    4.80
  -5  -2   0  124.29    4.90
   7  -5   0  123.39    4.70
  -7   6   0  119.69    4.90
   6   1   0  115.99    4.90
  -7   6   0  127.19    5.10
  -7   6   0  121.89    4.60
  -7   6   0  119.99    4.80
   6   1   0  120.59    5.00
   6   1   0  123.39    5.10
   1  -7   0  116.49    4.90
   1  -7   0  117.29    4.80
   1  -7   0  121.09    4.80
   7  -6   0  138.09    5.30
  -6  -1   0  128.29    4.90
  -1   7   0  131.49    4.80
  -6  -1   0  134.49    5.00
   7  -6   0  128.29    4.90
  -6  -1   0  132.79    5.20
  -1   7   0  132.09    4.90
  -1   7   0  129.69    4.90
   7   0   0  107.39    4.60
  -7   7   0  108.89    4.10
   0  -7   0  109.29    4.40
   7   0   0  113.99    4.60
  -7   7   0  102.99    4.50
  -7   7   0  109.59    4.50
  -7   7   0  107.89    4.20
   0  -7   0  109.09    4.40
   0  -7   0  109.09    4.40
  -7   0   0  101.19    4.30
   0   7   0  105.49    4.40
   7  -7   0  108.29    4.70
  -7   0   0  107.29    4.60
   0   7   0  111.29    4.40
   0   7   0  110.19    4.30
   7  -7   0  106.69    4.40
   7  -7   0  113.99    4.30
  -7   0   0  109.69    4.90
  -8   1   0  606.74   21.40
   1   7   0  598.44   21.10
   1   7   0  625.84   21.20
   1   7   0  604.94   21.20
   7  -8   0  603.24   21.00
   7  -8   0  609.34   21.40
  -8   1   0  633.04   21.80
   7  -8   0  602.34   21.10
  -8   1   0  600.34   21.10
  -7   8   0  603.54   21.20
   8  -1   0  631.24   21.50
  -1  -7   0  615.94   21.10
  -1  -7   0  603.74   21.10
  -7   8   0  602.24   21.20
   8  -1   0  604.64   21.30
  -7   8   0  605.64   20.90
  -1  -7   0  592.84   21.20
  -8   2   0  775.52   27.00
   6  -8   0  787.02   27.30
  -8   2   0  824.92   27.30
   2   6   0  797.62   27.20
  -8   2   0  761.12   27.40
   2   6   0  791.52   27.10
   2   6   0  777.62   27.10
   6  -8   0  779.02   27.10
   6  -8   0  793.72   27.00
  -2  -6   0  790.02   27.10
   8  -2   0  792.02   27.10
   8  -2   0  807.92   27.30
   8  -2   0  819.42   28.70
  -2  -6   0  756.02   27.20
  -6   8   0  784.62   26.80
  -6   8   0  793.12   27.20
  -6   8   0  772.52   27.20
  -2  -6   0  788.22   27.10
  -8   3   0  272.27   10.60
  -8   3   0  290.37   11.60
   3   5   0  289.77   10.50
  -8   3   0  282.57   10.30
   3   5   0  276.87   10.50
   5  -8   0  274.87   10.40
   5  -8   0  282.97   10.50
   3   5   0  279.07   10.40
   5  -8   0  287.37   10.30
   8  -3   0  308.07   12.00
  -5   8   0  299.57   10.10
  -5   8   0  302.57   10.50
  -5   8   0  296.77   10.50
   8  -3   0  294.87   10.40
  -3  -5   0  302.77   10.50
   8  -3   0  303.07   10.60
  -3  -5   0  294.77   10.60
  -3  -5   0  294.27   10.40
  -8   4   0  383.66   13.80
  -8   4   0  379.06   13.90
   4   4   0  401.86   13.80
   4   4   0  399.56   13.70
   4   4   0  402.46   13.70
  -8   4   0  392.56   14.20
   4  -8   0  383.46   13.70
   4  -8   0  389.56   13.60
   4  -8   0  404.76   13.60
   8  -4   0  375.86   13.70
  -4  -4   0  372.46   13.60
  -4   8   0  375.66   13.30
  -4   8   0  386.16   13.60
  -4  -4   0  384.76   13.70
   8  -4   0  378.86   13.50
  -4  -4   0  375.66   13.80
  -4   8   0  378.86   13.60
   8  -4   0  384.16   14.10
   5   3   0  276.57   10.50
  -8   5   0  281.27   10.90
   3  -8   0  277.87   10.40
  -8   5   0  283.77   10.50
   5   3   0  288.27   10.50
   5   3   0  281.57   10.50
   3  -8   0  280.27   10.40
  -8   5   0  272.07   10.60
   3  -8   0  283.27   10.30
  -8   5   0  287.07   10.50
  -5  -3   0  299.47   10.40
   8  -5   0  294.87   10.50
   8  -5   0  293.57   10.80
  -3   8   0  304.17   10.40
  -3   8   0  292.87   10.20
   8  -5   0  299.17   10.30
  -5  -3   0  292.77   10.60
  -3   8   0  297.77   10.40
  -5  -3   0  308.77   10.60
   2  -8   0  801.02   27.00
  -8   6   0  757.62   27.20
   6   2   0  813.62   27.20
   6   2   0  788.42   27.30
  -8   6   0  803.52   27.10
   2  -8   0  766.82   27.10
  -8   6   0  793.42   26.80
   6   2   0  782.92   27.10
  -8   6   0  804.02   27.20
   2  -8   0  777.12   27.10
   8  -6   0  793.22   26.90
   8  -6   0  789.82   27.50
   8  -6   0  801.52   27.10
  -2   8   0  795.82   27.10
  -6  -2   0  769.42   27.30
  -2   8   0  776.82   27.00
  -6  -2   0  791.12   27.20
  -6  -2   0  767.32   27.10
  -2   8   0  775.12   26.90
  -8   7   0  594.74   21.30
   1  -8   0  604.04   21.20
   7   1   0  617.04   21.40
  -8   7   0  614.84   21.00
   1  -8   0  627.84   21.10
  -8   7   0  619.14   21.30
  -8   7   0  619.04   20.90
   7   1   0  610.24   21.20
   1  -8   0  611.44   21.10
   7   1   0  622.94   21.30
  -7  -1   0  587.64   21.10
   8  -7   0  609.74   21.40
  -1   8   0  606.54   21.00
  -1   8   0  597.14   21.10
  -1   8   0  603.74   21.10
   8  -7   0  593.44   21.10
  -7  -1   0  600.74   21.20
  -7  -1   0  597.54   21.40
   8   0   0  407.76   14.40
   0  -8   0  393.96   14.30
   8   0   0  417.96   16.00
   0  -8   0  408.26   14.30
  -8   8   0  386.26   14.40
  -8   8   0  411.46   14.40
  -8   8   0  414.46   14.00
  -8   8   0  403.16   14.10
   8   0   0  408.96   14.40
  -8   0   0  395.66   14.60
   8  -8   0  414.06   14.20
   0   8   0  402.76   14.20
   8  -8   0  392.86   14.30
   8  -8   0  397.76   14.50
  -8   0   0  406.06   14.50
   0   8   0  386.36   14.50
  -8   0   0  390.06   14.20
   0   8   0  401.56   14.30
  -9   1   0  471.15   17.30
   1   8   0  470.95   16.80
   8  -9   0  476.25   16.90
   8  -9   0  494.95   16.70
   8  -9   0  491.55   17.20
  -9   1   0  488.05   17.10
   1   8   0  474.55   16.90
  -9   1   0  471.95   16.90
   1   8   0  493.45   17.00
  -8   9   0  472.05   16.60
   9  -1   0  471.75   17.00
  -1  -8   0  473.05   17.10
  -8   9   0  478.35   16.60
  -1  -8   0  478.45   16.90
  -8   9   0  485.45   17.00
   9  -1   0  474.95   17.40
  -1  -8   0  471.85   16.90
   9  -1   0  478.15   17.00
  -9   2   0    3.70    1.30
   7  -9   0    3.40    1.20
  -9   2   0    3.20    1.20
   7  -9   0    3.80    1.20
   2   7   0    3.10    1.20
  -9   2   0    3.40    1.40
   7  -9   0    2.60    0.90
   2   7   0    1.00    1.40
   2   7   0    4.80    1.30
  -2  -7   0    1.90    1.30
  -7   9   0    4.10    1.20
   9  -2   0    3.90    1.30
  -2  -7   0    2.70    1.20
  -2  -7   0    2.40    1.20
   9  -2   0    4.20    1.50
  -7   9   0    3.10    1.20
   9  -2   0    3.40    1.10
   3   6   0  294.27   10.70
   3   6   0  286.77   10.60
  -9   3   0  281.47   10.80
   6  -9   0  283.97   10.30
  -9   3   0  285.77   10.40
   6  -9   0  291.67   10.70
   3   6   0  286.37   10.50
   6  -9   0  289.17   10.60
  -6   9   0  281.97   10.50
   9  -3   0  298.97   10.70
   9  -3   0  299.87   11.60
  -6   9   0  291.37   10.60
  -6   9   0  289.07   10.20
  -3  -6   0  293.37   10.60
  -3  -6   0  290.27   10.70
  -3  -6   0  294.67   10.60
   9  -3   0  291.77   10.50
  -9   4   0   14.60    1.70
  -9   4   0    9.40    1.50
   4   5   0   10.70    1.60
   4   5   0   15.10    1.60
   4   5   0    9.70    1.30
   5  -9   0   10.10    1.40
   5  -9   0   10.60    1.30
  -9   4   0   14.30    1.40
  -5   9   0   14.90    1.50
  -5   9   0   14.40    1.50
  -4  -5   0   15.40    1.70
  -4  -5   0   13.40    1.60
  -4  -5   0   16.20    1.90
   9  -4   0   15.20    1.60
   5   4   0    9.50    1.40
  -9   5   0   12.50    1.40
   4  -9   0   14.50    1.50
   4  -9   0   13.90    1.50
  -9   5   0   16.10    1.70
  -9   5   0    9.90    2.30
  -9   5   0   12.30    1.50
   5   4   0   11.00    1.50
   5   4   0   11.60    1.40
   9  -5   0   16.50    1.60
  -4   9   0   15.90    1.20
  -5  -4   0   11.80    1.50
  -4   9   0   14.10    1.60
  -5  -4   0   11.60    1.50
  -5  -4   0   14.90    1.60
   9  -5   0   13.90    1.70
  -4   9   0   12.70    1.40
   3  -9   0  287.97   10.50
  -9   6   0  288.67   10.50
  -9   6   0  285.07   11.10
  -9   6   0  281.77   10.30
   3  -9   0  285.77   10.40
   6   3   0  288.37   10.70
   3  -9   0  288.27   10.50
   6   3   0  294.47   10.60
   6   3   0  276.07   10.50
  -9   6   0  283.77   10.70
  -6  -3   0  294.57   10.80
   9  -6   0  293.57   10.80
   9  -6   0  287.07   10.30
   9  -6   0  293.47   10.60
  -6  -3   0  281.37   10.50
  -6  -3   0  299.47   10.60
  -3   9   0  281.27   10.20
  -3   9   0  290.77   10.40
   2  -9   0    2.00    1.10
  -9   7   0    4.30    1.00
   7   2   0    4.50    1.40
  -9   7   0    4.90    1.20
   2  -9   0    2.40    1.20
  -9   7   0    7.20    1.40
  -9   7   0    2.70    1.50
   7   2   0    1.70    1.10
   2  -9   0    5.60    1.20
  -7  -2   0    4.40    1.30
  -7  -2   0    4.30    1.30
  -7  -2   0    1.40    1.30
  -2   9   0    1.90    2.00
  -2   9   0    5.40    1.30
   9  -7   0    4.70    1.40
   9  -7   0    6.40    1.30
   8   1   0  488.95   17.00
   1  -9   0  469.05   17.00
   8   1   0  476.45   17.40
  -9   8   0  474.65   16.70
  -9   8   0  470.55   17.10
   8   1   0  509.75   18.70
  -9   8   0  475.25   16.60
  -9   8   0  463.15   17.00
   1  -9   0  479.95   16.90
   1  -9   0  489.05   16.90
   9  -8   0  469.95   16.90
  -1   9   0  484.55   16.90
  -1   9   0  476.05   16.70
  -8  -1   0  449.46   16.80
   9  -8   0  492.35   17.30
  -8  -1   0  478.15   17.20
  -1   9   0  478.25   16.90
  -8  -1   0  483.05   17.10
  -9   9   0  117.59    5.20
   9   0   0  115.69    6.00
  -9   9   0  113.19    5.10
  -9   9   0  122.39    4.60
  -9   9   0  113.99    4.60
   0  -9   0  110.19    5.00
   9   0   0  115.29    5.10
   0  -9   0  120.69    5.10
  -9   0   0  119.29    5.00
   9  -9   0  120.99    4.80
   9  -9   0  114.89    4.90
  -9   0   0  112.49    5.30
  -9   0   0  119.69    5.20
   0   9   0  117.19    4.90
   0   9   0  109.39    4.90
   0   9   0  116.79    5.00
   9  -9   0  124.09    5.40
 -10   1   0  178.38    7.30
 -10   1   0  165.88    7.30
   1   9   0  167.88    6.90
   9 -10   0  166.68    6.90
   9 -10   0  180.28    7.30
 -10   1   0  166.48    6.80
   9 -10   0  165.18    6.60
   1   9   0  168.18    6.90
  -9  10   0  177.08    6.50
  -9  10   0  166.58    6.40
  -1  -9   0  176.48    6.90
  -9  10   0  174.48    7.10
  -1  -9   0  179.18    7.10
  -9  10   0  179.68    7.70
  -1  -9   0  184.28    7.00
  10  -1   0  179.78    7.20
  10  -1   0  179.68    7.30
   2   8   0  687.03   24.00
   2   8   0  686.13   24.00
 -10   2   0  699.03   24.10
   8 -10   0  665.13   23.80
   8 -10   0  679.73   23.70
 -10   2   0  674.73   23.80
   8 -10   0  668.93   24.10
 -10   2   0  644.24   24.20
  -8  10   0  665.03   24.00
  -8  10   0  700.83   24.00
  10  -2   0  707.23   24.30
  10  -2   0  706.53   24.00
  -2  -8   0  717.43   23.90
  10  -2   0  693.33   24.00
  -2  -8   0  661.63   24.00
  -8  10   0  683.43   23.50
  -2  -8   0  706.03   24.00
   3   7   0 1112.89   38.30
   7 -10   0 1118.09   38.40
   7 -10   0 1094.39   38.20
   3   7   0 1140.99   38.30
 -10   3   0 1106.89   38.10
 -10   3   0 1138.09   38.50
 -10   3   0 1067.69   38.50
   7 -10   0 1099.09   38.10
  -7  10   0 1113.79   38.30
  -3  -7   0 1145.79   38.30
  10  -3   0 1116.99   38.20
  10  -3   0 1115.59   38.40
  -7  10   0 1112.69   38.20
  -7  10   0 1097.19   37.80
  -3  -7   0 1130.29   38.20
  10  -3   0 1142.39   38.70
  -3  -7   0 1088.19   38.40
 -10   4   0   92.19    3.80
 -10   4   0   82.19    4.20
   4   6   0   71.79    4.10
 -10   4   0   77.19    4.30
   6 -10   0   76.59    3.80
   6 -10   0   79.39    4.00
   6 -10   0   90.89    3.90
   4   6   0   78.49    4.10
  10  -4   0   84.49    4.00
  -4  -6   0   82.19    4.10
  10  -4   0   89.39    4.40
  -6  10   0   87.19    3.90
  -6  10   0   81.19    3.90
  10  -4   0   84.89    4.30
  -6  10   0   92.59    3.40
  -4  -6   0   88.29    4.00
   5 -10   0  221.78    8.70
 -10   5   0  212.48    8.20
 -10   5   0  217.88    9.90
 -10   5   0  213.18    8.80
   5   5   0  209.38    9.70
   5 -10   0  211.48    8.40
 -10   5   0  218.78    8.70
   5   5   0  212.58    8.60
   5 -10   0  219.78    8.60
  -5  -5   0  233.68    8.60
  10  -5   0  237.28    8.60
  10  -5   0  243.38    9.00
  -5  -5   0  235.38    8.50
  -5  10   0  234.18    8.10
  -5  10   0  241.28    8.60
  10  -5   0  233.38    8.40
  -5  -5   0  228.78    8.70
  -5  10   0  236.88    8.50
   4 -10   0   75.49    4.00
 -10   6   0   86.69    3.70
 -10   6   0   84.49    4.80
 -10   6   0   77.69    4.10
   4 -10   0   80.79    4.00
   4 -10   0   91.79    3.90
   6   4   0   84.19    4.30
   6   4   0   77.89    5.10
 -10   6   0   88.59    4.00
  -6  -4   0   86.99    4.10
  10  -6   0   82.89    4.40
  -6  -4   0   87.79    4.20
  -4  10   0   88.29    3.60
  -4  10   0   89.49    3.90
  10  -6   0   86.29    4.00
  -6  -4   0   89.69    4.00
  10  -6   0   91.59    3.80
  -4  10   0   84.29    3.80
   3 -10   0 1104.89   38.20
   7   3   0 1145.19   39.00
 -10   7   0 1102.69   38.20
   7   3   0 1144.59   39.60
 -10   7   0 1140.19   38.70
 -10   7   0 1100.19   38.40
 -10   7   0 1104.39   38.30
   3 -10   0 1072.69   38.20
   3 -10   0 1120.79   38.10
  10  -7   0 1126.59   38.60
  -3  10   0 1089.99   37.90
  -7  -3   0 1117.99   38.20
  -3  10   0 1105.39   38.10
  -7  -3   0 1090.59   38.50
  10  -7   0 1109.59   38.00
  10  -7   0 1110.99   38.20
  -3  10   0 1106.39   38.20
  -7  -3   0 1141.89   38.30
 -10   8   0  682.33   23.60
   2 -10   0  701.43   23.90
 -10   8   0  692.83   24.10
   2 -10   0  648.74   23.90
   2 -10   0  665.63   23.90
   8   2   0  672.83   24.30
 -10   8   0  680.23   23.80
  -8  -2   0  702.23   24.10
  -8  -2   0  711.13   24.00
  -2  10   0  698.13   23.90
  -8  -2   0  665.43   24.20
  10  -8   0  692.33   23.90
  -2  10   0  702.63   23.70
  -2  10   0  694.63   24.00
  10  -8   0  674.93   24.30
   9   1   0  183.78    9.00
   1 -10   0  178.58    6.90
 -10   9   0  166.28    6.60
 -10   9   0  176.48    7.10
 -10   9   0  176.98    7.40
 -10   9   0  172.68    7.10
   1 -10   0  167.38    6.90
   9   1   0  178.18    7.60
   1 -10   0  165.68    6.90
  -9  -1   0  174.18    6.90
  -9  -1   0  174.68    7.30
  10  -9   0  186.48    7.40
  -1  10   0  171.38    7.00
  -1  10   0  178.68    7.00
  -1  10   0  166.78    6.70
  10  -9   0  168.88    6.90
  -9  -1   0  178.08    7.10
 -10  10   0  404.76   14.90
  10   0   0  406.96   15.20
   0 -10   0  398.46   14.80
 -10  10   0  415.46   14.40
   0 -10   0  433.56   14.80
 -10  10   0  400.66   14.90
  10   0   0  412.86   15.00
   0 -10   0  386.66   14.80
  10 -10   0  406.06   14.80
   0  10   0  419.36   14.80
  10 -10   0  420.76   15.20
 -10   0   0  427.36   15.10
 -10   0   0  389.86   14.70
   0  10   0  409.46   14.80
 -10   0   0  401.36   15.20
  10 -10   0  431.26   14.90
   1  10   0   88.19    4.30
  10 -11   0   86.09    4.20
 -11   1   0   85.89    4.20
  10 -11   0   94.99    4.90
  10 -11   0   90.29    4.50
 -11   1   0   93.99    4.50
 -11   1   0   86.69    4.70
 -10  11   0   82.09    4.30
  -1 -10   0   81.89    4.40
 -10  11   0   84.49    3.70
  -1 -10   0   90.09    4.30
 -10  11   0   88.19    4.30
  11  -1   0   87.69    4.80
  -1 -10   0   93.49    4.30
  11  -1   0   86.69    4.30
   9 -11   0   76.19    3.90
   9 -11   0   85.59    4.00
 -11   2   0   80.49    3.90
 -11   2   0   86.39    4.40
   9 -11   0   82.29    4.30
   2   9   0   83.19    4.20
 -11   2   0   87.59    4.50
   2   9   0   84.29    4.20
  -2  -9   0   81.09    4.30
  11  -2   0   90.39    4.70
  -9  11   0   81.39    3.40
  -9  11   0   84.09    4.20
  -2  -9   0   82.89    4.00
  11  -2   0   81.39    5.50
  -2  -9   0   85.79    4.10
   8 -11   0  185.68    7.70
 -11   3   0  181.98    7.80
   3   8   0  204.18    7.70
   3   8   0  197.78    7.50
   8 -11   0  193.08    7.50
 -11   3   0  188.98    7.30
 -11   3   0  201.48    7.90
  11  -3   0  195.28    8.10
  -8  11   0  183.88    6.90
  -8  11   0  187.28    7.50
  -3  -8   0  197.18    7.60
  -8  11   0  173.18    7.40
  -3  -8   0  179.68    7.60
  -3  -8   0  191.58    7.50
  11  -3   0  190.38    7.50
  11  -3   0  193.78    7.60
 -11   4   0   78.89    4.10
 -11   4   0   85.79    3.80
   7 -11   0   76.89    3.90
   4   7   0   76.89    3.90
   7 -11   0   84.29    4.10
 -11   4   0   76.99    4.20
   7 -11   0   79.19    3.80
   4   7   0   77.79    4.00
  -4  -7   0   82.29    4.00
  11  -4   0   86.89    4.40
  11  -4   0   88.69    4.20
  11  -4   0   83.89    3.90
  -7  11   0   83.59    3.40
  -7  11   0   82.19    4.10
  -4  -7   0   77.39    4.10
  -7  11   0   84.89    3.90
  -4  -7   0   85.89    4.00
   6 -11   0  236.28    9.30
 -11   5   0  250.37    9.60
   6 -11   0  242.48    9.50
   5   6   0  241.48    9.50
 -11   5   0  241.18    9.10
   5   6   0  248.68    9.50
 -11   5   0  235.18    9.70
 -11   5   0  239.18    9.70
   6 -11   0  251.27    9.20
  -6  11   0  252.07    9.40
  11  -5   0  264.47   10.00
  -6  11   0  250.87    8.90
  -5  -6   0  251.57    9.50
  -5  -6   0  256.27    9.70
  -6  11   0  250.87    9.40
  -5  -6   0  260.37    9.40
  11  -5   0  258.17    9.70
  11  -5   0  261.57    9.60
 -11   6   0  236.78    9.80
   6   5   0  249.78    9.50
   5 -11   0  243.18    9.40
   6   5   0  246.18   10.10
   5 -11   0  244.68    9.20
 -11   6   0  243.98    9.50
 -11   6   0  238.48    9.10
   5 -11   0  239.68    9.30
 -11   6   0  237.48    9.50
  -6  -5   0  255.27    9.60
  -6  -5   0  259.97    9.70
  -5  11   0  249.18    9.00
  11  -6   0  254.27    9.50
  11  -6   0  258.37    9.90
  -6  -5   0  260.07    9.50
  -5  11   0  254.97    9.30
  -5  11   0  249.28    9.40
  11  -6   0  253.27    9.20
 -11   7   0   82.99    4.20
 -11   7   0   82.89    4.00
   4 -11   0   82.59    4.10
   7   4   0   80.99    4.00
 -11   7   0   82.19    3.60
   4 -11   0   78.99    3.90
   7   4   0   80.89    5.00
   4 -11   0   80.59    3.80
  -7  -4   0   80.49    4.20
  -4  11   0   82.39    3.90
  11  -7   0   88.19    3.80
  11  -7   0   89.69    4.50
  -4  11   0   84.49    3.90
  11  -7   0   84.09    4.00
  -7  -4   0   82.39    4.10
 -11   8   0  203.48    7.20
   8   3   0  200.18    8.00
   3 -11   0  186.98    7.60
   3 -11   0  190.58    7.50
 -11   8   0  193.78    7.90
   8   3   0  203.88    7.80
 -11   8   0  195.28    7.50
 -11   8   0  202.98    8.60
   3 -11   0  198.58    7.50
  -8  -3   0  186.78    7.50
  -8  -3   0  179.28    7.90
  -3  11   0  186.28    7.50
  11  -8   0  182.68    7.90
  -3  11   0  183.98    7.40
  -8  -3   0  192.08    7.80
  -3  11   0  188.48    7.20
  11  -8   0  190.98    7.50
   9   2   0   85.59    5.20
   9   2   0   89.49    4.30
   2 -11   0   76.89    4.00
 -11   9   0   83.09    4.20
   2 -11   0   81.09    4.00
   2 -11   0   81.09    4.10
 -11   9   0   83.49    3.70
 -11   9   0   88.19    5.00
  -2  11   0   77.79    4.30
  -2  11   0   80.09    3.80
  -2  11   0   82.29    4.00
  -9  -2   0   81.89    4.20
  -9  -2   0   79.79    4.40
  -9  -2   0   79.09    4.30
  11  -9   0   86.39    4.40
  11  -9   0   81.89    4.10
   1 -11   0   92.09    4.30
 -11  10   0   87.69    3.80
 -11  10   0   88.69    4.90
 -11  10   0   87.39    3.70
 -11  10   0   84.59    4.30
  10   1   0   91.79    4.40
   1 -11   0   87.99    4.20
   1 -11   0   87.69    4.20
  10   1   0   88.59    4.60
  11 -10   0   80.89    4.10
  11 -10   0   88.59    4.80
 -10  -1   0   87.69    4.50
 -10  -1   0   84.49    4.60
  -1  11   0   84.19    4.20
 -10  -1   0   90.49    4.50
  11   0   0   11.20    1.90
   0 -11   0    5.60    1.50
   0 -11   0    6.10    1.80
  11   0   0    8.50    1.90
   0 -11   0    6.80    1.70
 -11  11   0    9.40    2.30
 -11  11   0    8.80    1.20
 -11  11   0    9.80    1.40
  11 -11   0    9.70    1.90
 -11   0   0    8.60    1.80
 -11   0   0    9.20    3.10
 -11   0   0    6.20    1.70
   0  11   0    4.70    1.70
  11 -11   0    7.80    1.50
  11 -12   0  152.58    6.80
  11 -12   0  152.08    6.40
 -12   1   0  155.78    7.10
 -12   1   0  157.98    6.90
   1  11   0  153.58    7.80
  11 -12   0  165.78    7.10
 -11  12   0  144.59    5.80
  12  -1   0  147.19    6.50
 -11  12   0  150.88    6.00
 -11  12   0  153.08    6.80
  -1 -11   0  150.88    6.50
  12  -1   0  157.38    7.00
  10 -12   0   35.90    2.60
   2  10   0   29.40    3.30
  10 -12   0   28.60    2.80
  10 -12   0   33.50    3.10
 -12   2   0   35.50    2.90
 -12   2   0   33.50    2.80
  -2 -10   0   36.80    2.70
 -10  12   0   36.30    3.20
  -2 -10   0   36.50    2.90
 -10  12   0   39.70    2.20
  12  -2   0   38.90    3.40
 -10  12   0   37.50    2.00
  12  -2   0   39.90    2.80
   3   9   0   51.09    3.90
   9 -12   0   45.50    2.80
 -12   3   0   54.79    3.30
   9 -12   0   44.80    3.30
 -12   3   0   46.40    2.80
   9 -12   0   47.40    2.60
  -3  -9   0   45.20    3.20
  -9  12   0   43.50    2.20
  12  -3   0   45.60    3.30
  -3  -9   0   46.50    3.10
  12  -3   0   43.10    3.00
  -9  12   0   43.70    3.20
   8 -12   0   21.00    2.10
 -12   4   0   23.30    2.50
 -12   4   0   16.10    1.90
   4   8   0   18.70    2.70
   8 -12   0   21.60    2.40
  -8  12   0   15.30    1.50
  -4  -8   0   21.00    2.20
  -8  12   0   19.20    3.00
  12  -4   0   17.90    2.50
  -4  -8   0   15.40    2.00
 -12   5   0  684.03   25.80
 -12   5   0  716.53   24.60
 -12   5   0  720.33   25.10
   7 -12   0  700.33   24.80
   5   7   0  697.73   25.00
   7 -12   0  714.83   24.70
   7 -12   0  731.43   25.10
  12  -5   0  693.83   24.90
  12  -5   0  702.93   24.80
  -5  -7   0  689.83   25.10
  -7  12   0  708.73   24.80
  -7  12   0  694.73   24.30
  -5  -7   0  739.33   25.00
  12  -5   0  734.13   25.50
 -12   6   0  127.39    5.60
 -12   6   0  111.19    5.40
   6 -12   0  113.19    5.10
 -12   6   0  127.59    5.00
   6 -12   0  117.89    5.00
   6 -12   0  113.19    5.20
   6   6   0  111.39    5.20
 -12   6   0  116.99    5.30
   6   6   0  116.79    5.90
  -6  -6   0  109.09    5.50
  12  -6   0  116.69    5.60
  12  -6   0  111.79    5.20
  -6  12   0  117.39    4.60
  12  -6   0  113.89    4.90
  -6  12   0  112.19    5.10
  -6  -6   0  109.69    5.30
   7   5   0  720.03   25.30
   5 -12   0  737.73   25.00
 -12   7   0  710.93   24.70
   5 -12   0  696.63   25.10
 -12   7   0  736.03   25.40
   5 -12   0  700.23   25.00
 -12   7   0  695.83   25.40
   7   5   0  706.53   25.20
  -7  -5   0  754.52   25.70
  12  -7   0  724.53   25.20
  -7  -5   0  730.33   25.20
  12  -7   0  706.63   25.30
  -7  -5   0  682.43   25.30
  -5  12   0  708.43   25.00
  12  -7   0  715.93   25.60
   4 -12   0   15.40    2.10
 -12   8   0   20.20    2.00
   8   4   0   17.30    3.80
 -12   8   0   15.60    2.10
   8   4   0   16.00    2.20
   4 -12   0   16.10    2.10
 -12   8   0   18.20    2.30
 -12   8   0   20.20    1.80
  12  -8   0   17.30    2.40
  -8  -4   0   15.70    2.10
  -8  -4   0   16.20    2.20
  -4  12   0   21.10    1.90
  12  -8   0   21.00    2.20
  -4  12   0   14.20    1.80
   9   3   0   49.90    3.10
   9   3   0   45.80    3.40
 -12   9   0   51.69    2.70
   3 -12   0   49.20    3.00
   3 -12   0   44.20    2.90
 -12   9   0   43.90    3.30
   3 -12   0   44.10    3.00
 -12   9   0   48.50    3.10
  -9  -3   0   38.20    3.00
  12  -9   0   44.00    3.30
  -9  -3   0   41.40    3.20
  -3  12   0   42.20    2.80
  -9  -3   0   35.60    3.00
  -3  12   0   42.20    2.60
   2 -12   0   31.60    2.70
  10   2   0   33.60    2.90
   2 -12   0   32.20    2.70
 -12  10   0   34.10    2.20
  10   2   0   33.80    2.90
 -12  10   0   32.70    2.70
   2 -12   0   30.60    2.70
 -12  10   0   31.60    2.70
 -12  10   0   33.50    2.10
 -10  -2   0   33.60    3.20
 -10  -2   0   34.40    2.80
  12 -10   0   35.50    3.30
  -2  12   0   33.50    2.50
 -10  -2   0   32.20    2.70
  12 -10   0   31.70    2.70
   1 -12   0  158.18    6.60
   1 -12   0  151.98    6.60
 -12  11   0  156.08    6.10
 -12  11   0  163.18    6.90
  11   1   0  154.98    7.50
   1 -12   0  163.78    6.60
  11   1   0  160.48    7.00
  12 -11   0  161.68    7.00
 -11  -1   0  147.79    6.90
 -11  -1   0  149.39    6.70
 -11  -1   0  150.98    6.50
  12 -11   0  151.28    6.60
  -1  12   0  147.39    6.90
  12   0   0    6.10    2.00
 -12  12   0    7.60    1.20
 -12  12   0    4.70    2.00
   0 -12   0    5.70    3.10
   0 -12   0    2.40    1.60
   0 -12   0    3.90    1.80
 -12   0   0    8.70    2.00
 -12   0   0    4.80    1.90
  12 -12   0    6.50    1.80
  12 -12   0    6.80    2.20
 -12   0   0    3.70    2.60
   1  12   0   85.39    4.60
  12 -13   0   90.49    5.00
 -13   1   0   96.19    4.80
  12 -13   0   91.79    4.40
  12 -13   0   92.39    4.40
 -13   1   0   88.99    5.10
 -13   1   0   87.69    4.90
  -1 -12   0   76.99    4.50
 -12  13   0   83.39    3.70
 -12  13   0   81.79    4.60
  -1 -12   0   81.19    4.70
  13  -1   0   86.49    5.00
  -1 -12   0   84.79    4.50
  11 -13   0   32.20    2.80
  11 -13   0   27.50    2.10
 -13   2   0   31.20    2.90
  11 -13   0   30.80    3.10
 -13   2   0   26.70    2.90
 -13   2   0   27.90    3.10
   2  11   0   30.40    3.00
  -2 -11   0   23.10    2.50
  -2 -11   0   24.00    2.70
 -11  13   0   25.50    1.80
  -2 -11   0   26.80    2.70
  13  -2   0   29.00    3.10
  13  -2   0   27.20    3.40
 -11  13   0   23.30    2.60
   3  10   0  103.09    4.90
 -13   3   0   94.19    4.60
 -13   3   0  107.39    5.30
 -13   3   0  100.99    5.20
  10 -13   0  106.49    5.10
  10 -13   0  103.79    4.80
  13  -3   0  100.29    5.40
 -10  13   0   95.89    4.00
  -3 -10   0   97.49    4.80
  13  -3   0   96.99    4.90
  -3 -10   0  106.89    5.10
  -3 -10   0   90.69    4.80
 -13   4   0   68.29    4.10
   9 -13   0   68.49    3.70
   4   9   0   74.69    4.20
 -13   4   0   80.09    4.40
   9 -13   0   70.39    3.70
 -13   4   0   66.49    3.80
   9 -13   0   74.09    4.30
  13  -4   0   70.39    3.90
  -4  -9   0   68.69    3.90
  13  -4   0   76.49    4.40
  -9  13   0   75.09    4.00
  -9  13   0   71.59    3.10
  -4  -9   0   68.49    4.00
  -4  -9   0   70.99    4.20
   8 -13   0  121.09    5.00
 -13   5   0  117.39    5.60
   8 -13   0  117.09    5.50
   8 -13   0  121.99    5.30
   5   8   0  123.59    5.50
 -13   5   0  117.09    5.10
 -13   5   0  124.39    5.80
  -5  -8   0  108.19    5.40
  -8  13   0  112.39    4.70
  13  -5   0  118.99    5.60
  -8  13   0  124.39    6.10
  -5  -8   0  122.09    5.60
  -5  -8   0  116.29    5.40
  13  -5   0  124.59    5.90
   7 -13   0   69.79    3.60
   6   7   0   72.79    4.30
 -13   6   0   68.59    4.10
 -13   6   0   74.29    3.60
   7 -13   0   70.39    3.70
   7 -13   0   70.09    4.10
 -13   6   0   76.09    4.30
 -13   6   0   72.69    4.10
  -6  -7   0   75.39    4.20
  13  -6   0   77.69    4.50
  -6  -7   0   76.99    4.10
  13  -6   0   80.79    4.60
  13  -6   0   70.59    3.70
  -6  -7   0   75.79    4.10
  -7  13   0   69.89    3.30
   6 -13   0   68.19    3.90
 -13   7   0   74.29    4.30
 -13   7   0   75.09    4.10
   6 -13   0   71.19    3.90
 -13   7   0   72.89    3.60
   6 -13   0   71.19    3.70
 -13   7   0   68.49    4.10
  13  -7   0   75.29    3.70
  -7  -6   0   74.99    4.00
  -6  13   0   74.69    3.70
  -7  -6   0   77.79    4.10
  13  -7   0   77.39    4.40
  -6  13   0   73.99    4.50
  13  -7   0   69.29    4.40
  -7  -6   0   76.09    4.30
 -13   8   0  111.09    5.50
   5 -13   0  122.79    5.20
   5 -13   0  117.99    5.20
   8   5   0  121.69    5.80
   5 -13   0  114.39    5.30
 -13   8   0  122.29    4.90
 -13   8   0  114.69    5.50
 -13   8   0  120.39    5.60
  -5  13   0  118.29    4.80
  13  -8   0  115.39    5.30
  13  -8   0  117.49    5.80
  -5  13   0  117.59    5.90
  -8  -5   0  112.79    5.60
  13  -8   0  113.29    5.40
  -8  -5   0  116.59    5.40
  -8  -5   0  122.59    5.40
   9   4   0   73.19    4.10
 -13   9   0   77.39    5.00
   4 -13   0   70.29    3.80
 -13   9   0   66.99    4.20
   4 -13   0   70.89    3.90
   4 -13   0   69.09    3.90
 -13   9   0   70.69    3.60
 -13   9   0   70.09    3.30
  13  -9   0   66.49    3.70
  -9  -4   0   63.69    4.00
  13  -9   0   75.89    4.60
  -9  -4   0   71.49    4.10
  -4  13   0   72.19    4.50
  -9  -4   0   71.19    4.10
  -4  13   0   67.99    3.50
   3 -13   0   96.09    4.90
   3 -13   0   94.19    4.70
  10   3   0  101.29    5.30
 -13  10   0  103.79    5.20
 -13  10   0  100.19    4.20
 -13  10   0   99.19    4.50
   3 -13   0  102.99    4.80
 -10  -3   0   99.99    5.20
 -10  -3   0   95.69    4.80
 -10  -3   0  100.39    5.30
  -3  13   0   99.09    5.90
  13 -10   0  100.19    4.90
  13 -10   0   97.99    5.30
 -13  11   0   28.90    2.10
   2 -13   0   24.60    2.60
   2 -13   0   26.90    2.90
 -13  11   0   27.90    2.00
  11   2   0   28.70    3.30
   2 -13   0   23.80    2.80
 -13  11   0   24.90    2.80
 -11  -2   0   22.90    3.00
 -11  -2   0   27.00    3.10
  13 -11   0   22.00    2.40
  13 -11   0   29.20    3.20
 -11  -2   0   27.60    3.20
  -2  13   0   20.20    3.30
   1 -13   0   92.49    5.30
 -13  12   0   88.49    3.90
 -13  12   0   89.99    3.80
   1 -13   0   87.99    5.40
  12   1   0   88.29    4.90
 -13  12   0   90.19    4.70
   1 -13   0   91.59    4.80
 -12  -1   0   84.49    4.50
  13 -12   0   85.59    5.00
  -1  13   0   78.79    4.60
 -12  -1   0   82.69    4.90
 -12  -1   0   82.39    5.00
  13 -12   0   81.09    4.40
   0 -13   0   63.99    4.20
 -13  13   0   62.09    3.50
 -13  13   0   63.29    3.10
   0 -13   0   58.59    4.00
   0 -13   0   65.19    4.20
  13   0   0   66.19    4.70
 -13  13   0   67.39    4.10
 -13   0   0   62.19    4.20
 -13   0   0   58.19    4.10
   0  13   0   69.09    4.80
 -13   0   0   67.49    4.60
  13 -13   0   59.89    3.90
  13 -13   0   62.39    4.70
  13 -14   0   73.79    4.50
 -14   1   0   75.79    4.70
 -14   1   0   83.29    4.70
   1  13   0   82.89    5.20
 -14   1   0   76.59    5.00
 -13  14   0   77.69    4.60
  -1 -13   0   77.89    4.70
  -1 -13   0   79.19    4.80
 -13  14   0   80.19    4.70
  14  -1   0   75.49    5.30
 -13  14   0   74.59    3.40
  -1 -13   0   73.89    4.50
 -14   2   0   -2.30    1.90
 -14   2   0   -0.30    2.10
  12 -14   0    0.00    1.90
  12 -14   0    0.40    1.70
 -14   2   0   -2.10    1.90
 -12  14   0    0.20    0.90
  14  -2   0   -0.80    2.00
  -2 -12   0   -1.00    2.00
  -2 -12   0   -1.00    1.80
 -12  14   0    2.20    1.80
  -2 -12   0    1.10    1.80
 -14   3   0  114.39    6.20
 -14   3   0  134.79    6.30
  11 -14   0  120.69    5.50
 -14   3   0  130.49    5.70
  11 -14   0  121.59    6.00
 -11  14   0  117.49    5.20
  14  -3   0  126.09    6.40
 -11  14   0  116.59    4.70
  -3 -11   0  115.69    6.20
  -3 -11   0  112.69    5.70
  -3 -11   0  119.59    5.70
 -11  14   0  125.09    5.90
 -14   4   0   15.70    2.50
   4  10   0   23.30    4.00
  10 -14   0   19.30    2.10
  10 -14   0   18.00    2.60
 -14   4   0   27.50    3.80
 -14   4   0   17.70    2.50
  10 -14   0   21.90    2.40
  -4 -10   0   22.10    2.60
  -4 -10   0   22.50    2.60
 -10  14   0   20.10    1.70
 -10  14   0   24.10    3.00
  14  -4   0   25.60    3.10
  14  -4   0   21.50    2.50
  -4 -10   0   20.70    2.80
   9 -14   0  177.98    7.70
   9 -14   0  163.28    7.00
 -14   5   0  163.18    7.60
 -14   5   0  178.98    7.90
 -14   5   0  170.38    7.10
   9 -14   0  167.38    7.20
  -5  -9   0  183.68    7.50
  -5  -9   0  194.18    7.70
  14  -5   0  180.98    7.50
  -9  14   0  166.48    6.60
  14  -5   0  192.68    8.10
  -5  -9   0  178.38    7.60
 -14   6   0   52.29    3.60
   8 -14   0   55.49    3.80
   8 -14   0   46.40    3.00
 -14   6   0   53.99    3.20
   6   8   0   50.89    4.10
 -14   6   0   51.19    3.80
   8 -14   0   48.10    3.40
  -6  -8   0   46.40    3.50
  14  -6   0   50.49    3.40
  -6  -8   0   49.40    3.70
  -8  14   0   45.00    2.60
  14  -6   0   55.59    4.20
  -8  14   0   52.79    3.40
  -6  -8   0   47.30    3.60
 -14   7   0  214.88    9.00
 -14   7   0  196.18    8.90
   7   7   0  204.68    8.70
 -14   7   0  217.18    8.20
   7 -14   0  202.68    8.40
   7 -14   0  203.68    8.70
 -14   7   0  214.98    9.40
   7 -14   0  214.38    8.30
  -7  -7   0  212.38    9.00
  -7  14   0  221.18    8.50
  -7  -7   0  223.18    8.80
  14  -7   0  215.88    9.10
  14  -7   0  223.68    9.00
  -7  14   0  212.28    7.90
  -7  -7   0  219.08    8.60
  14  -7   0  209.18    8.60
 -14   8   0   49.60    3.30
   6 -14   0   45.20    3.20
 -14   8   0   46.20    3.50
   8   6   0   46.40    3.80
   6 -14   0   52.39    3.60
 -14   8   0   51.29    3.00
   6 -14   0   54.89    3.20
  14  -8   0   51.69    4.20
  -8  -6   0   47.00    3.90
  -6  14   0   46.50    2.70
  -8  -6   0   47.90    3.50
  14  -8   0   49.90    3.10
  14  -8   0   46.40    3.20
  -8  -6   0   47.60    3.40
  -6  14   0   47.90    3.30
 -14   9   0  168.18    7.20
   5 -14   0  183.38    7.30
   5 -14   0  168.98    7.30
 -14   9   0  171.18    6.80
   5 -14   0  160.18    7.20
   9   5   0  173.58    7.50
 -14   9   0  168.38    7.50
  -9  -5   0  168.98    7.70
  14  -9   0  185.58    7.90
  -9  -5   0  184.48    7.60
  14  -9   0  169.78    7.40
  -5  14   0  167.28    7.30
  14  -9   0  162.58    6.90
  -9  -5   0  194.48    7.60
   4 -14   0   18.30    2.60
  10   4   0   22.90    2.80
 -14  10   0   21.20    2.80
   4 -14   0   21.10    2.50
   4 -14   0   24.90    2.70
 -14  10   0   19.30    2.10
 -10  -4   0   25.30    3.20
  14 -10   0   22.10    2.80
  14 -10   0   21.70    2.80
  -4  14   0   18.40    2.40
 -10  -4   0   23.30    2.80
 -10  -4   0   17.10    2.40
 -14  11   0  125.79    5.10
   3 -14   0  128.99    5.90
 -14  11   0  118.09    5.30
 -14  11   0  121.79    6.00
   3 -14   0  125.39    5.80
   3 -14   0  131.59    7.70
  11   3   0  127.19    6.10
 -11  -3   0  111.29    5.80
 -11  -3   0  121.59    5.90
  14 -11   0  115.99    7.20
  -3  14   0  122.49    5.70
  14 -11   0  119.99    6.40
 -14  12   0   -0.20    1.20
   2 -14   0    0.20    1.70
 -14  12   0    0.20    1.90
   2 -14   0   -0.80    1.80
 -14  12   0    2.20    1.20
  12   2   0    2.20    2.40
 -12  -2   0    0.20    1.90
  -2  14   0    1.50    2.00
  14 -12   0   -0.20    1.90
 -12  -2   0    1.70    2.20
  14 -12   0   -1.20    2.20
 -12  -2   0   -1.30    1.80
   1 -14   0   67.89    4.70
 -14  13   0   78.39    4.60
 -14  13   0   79.29    3.70
 -14  13   0   81.19    3.70
   1 -14   0   73.69    4.30
  13   1   0   80.69    5.20
   1 -14   0   78.19    4.40
  14 -13   0   83.39    5.40
 -13  -1   0   79.09    5.10
 -13  -1   0   77.49    4.80
  14 -13   0   69.09    4.80
 -13  -1   0   74.49    4.80
 -14  14   0   16.20    2.60
   0 -14   0   24.50    3.00
   0 -14   0   16.30    2.50
 -14  14   0   16.10    1.90
   0 -14   0   11.60    2.50
 -14  14   0   16.10    2.00
  14   0   0   16.60    3.10
  14 -14   0   16.10    2.40
 -14   0   0   20.10    2.80
  14 -14   0   16.60    3.00
   0  14   0   17.80    2.60
 -14   0   0   18.40    2.90
 -14   0   0   15.10    2.70
 -15   1   0  171.38    8.10
  14 -15   0  160.18    7.50
   1  14   0  174.88    7.60
  14 -15   0  180.98    8.70
 -15   1   0  176.28    7.60
  -1 -14   0  164.88    7.90
  -1 -14   0  185.58    8.00
  15  -1   0  187.08    8.60
 -14  15   0  163.08    6.60
 -14  15   0  168.98    6.90
  -1 -14   0  192.28    8.10
 -14  15   0  174.38    8.10
   2  13   0   35.60    3.30
 -15   2   0   36.40    3.70
  13 -15   0   38.00    4.30
  13 -15   0   29.70    4.70
 -15   2   0   40.00    3.50
  -2 -13   0   42.80    3.60
 -13  15   0   38.50    2.80
  15  -2   0   42.10    4.50
 -13  15   0   41.70    4.10
  -2 -13   0   42.80    3.70
 -13  15   0   39.50    2.30
  12 -15   0   52.79    4.10
   3  12   0   52.89    4.10
  12 -15   0   54.49    3.40
 -15   3   0   56.49    4.00
 -15   3   0   51.99    4.40
  12 -15   0   50.99    3.70
  15  -3   0   49.80    4.70
  -3 -12   0   45.90    3.90
 -12  15   0   53.19    2.90
  -3 -12   0   45.20    3.70
 -12  15   0   52.39    4.10
 -12  15   0   47.60    2.60
  -3 -12   0   50.29    3.90
 -15   4   0    4.80    2.60
   4  11   0    4.00    2.00
  11 -15   0    5.20    2.00
  11 -15   0    7.40    2.20
 -15   4   0    7.90    2.10
  11 -15   0    9.50    1.50
  15  -4   0    4.20    2.60
 -11  15   0    8.90    1.20
  -4 -11   0    4.70    2.20
  -4 -11   0    7.20    2.10
  -4 -11   0    6.60    2.00
 -11  15   0    9.00    2.10
 -15   5   0   40.70    3.30
  10 -15   0   40.40    2.70
   5  10   0   41.30    3.60
 -15   5   0   39.70    3.60
  10 -15   0   43.90    3.40
  10 -15   0   45.30    4.50
  -5 -10   0   42.30    3.90
 -10  15   0   37.90    3.20
  -5 -10   0   42.70    3.30
  -5 -10   0   40.30    4.00
  15  -5   0   35.40    3.70
 -10  15   0   36.50    2.30
 -15   6   0   35.00    3.40
   9 -15   0   32.00    3.10
 -15   6   0   34.20    3.00
   6   9   0   35.40    3.50
   9 -15   0   33.50    2.70
  15  -6   0   35.20    3.70
  -6  -9   0   37.80    4.60
  -9  15   0   45.50    3.60
  -9  15   0   36.20    2.70
  -6  -9   0   38.90    3.50
  -6  -9   0   38.20    3.20
  15  -6   0   41.20    3.30
 -15   7   0   29.50    3.20
 -15   7   0   29.50    3.00
   7   8   0   37.60    3.20
   8 -15   0   42.50    5.20
   8 -15   0   29.70    3.10
   8 -15   0   32.10    2.80
  15  -7   0   43.00    4.10
  15  -7   0   36.70    3.10
  -7  -8   0   45.80    3.40
  -7  -8   0   37.20    3.50
  -8  15   0   44.70    4.60
  -8  15   0   37.90    2.50
  -7  -8   0   43.40    3.30
   8   7   0   35.80    3.60
 -15   8   0   32.40    2.70
   7 -15   0   33.00    3.70
   7 -15   0   31.70    2.90
 -15   8   0   30.00    3.20
   7 -15   0   34.90    2.90
  15  -8   0   37.60    3.10
  -8  -7   0   45.30    3.40
  -8  -7   0   37.90    3.20
  -7  15   0   42.50    5.10
  15  -8   0   36.60    4.20
  -8  -7   0   38.60    3.50
  -7  15   0   35.10    2.50
   9   6   0   32.60    3.60
   6 -15   0   29.50    2.80
 -15   9   0   31.90    3.70
   6 -15   0   32.40    3.30
   6 -15   0   37.30    3.10
 -15   9   0   33.40    2.70
 -15   9   0   33.70    3.00
  15  -9   0   40.10    3.10
  15  -9   0   34.80    4.00
  -6  15   0   39.40    4.40
  15  -9   0   33.50    2.70
  -9  -6   0   32.60    3.30
  -9  -6   0   41.50    3.30
  -9  -6   0   35.90    3.60
 -15  10   0   40.30    3.50
   5 -15   0   40.00    3.30
   5 -15   0   39.60    3.50
 -15  10   0   43.10    2.70
 -15  10   0   39.30    3.00
  10   5   0   39.10    3.80
   5 -15   0   41.10    3.20
 -10  -5   0   36.30    3.30
  15 -10   0   36.00    3.10
 -10  -5   0   38.80    4.10
 -10  -5   0   38.10    3.90
  -5  15   0   41.50    4.60
  15 -10   0   39.10    4.10
 -15  11   0    9.50    1.70
 -15  11   0    6.30    1.50
   4 -15   0    5.00    2.10
   4 -15   0    7.30    2.20
 -15  11   0    6.70    2.40
  11   4   0    5.00    2.40
   4 -15   0    8.70    1.90
 -11  -4   0   13.70    2.70
 -11  -4   0    4.70    2.40
  15 -11   0   12.90    2.60
 -11  -4   0    5.70    2.40
  15 -11   0    6.10    2.00
   3 -15   0   50.29    3.80
 -15  12   0   52.89    2.90
   3 -15   0   50.69    3.80
  12   3   0   54.39    4.40
   3 -15   0   50.59    3.70
 -15  12   0   57.89    3.50
 -15  12   0   50.99    4.20
 -12  -3   0   47.10    3.90
  -3  15   0   51.49    5.10
  15 -12   0   50.79    4.20
  15 -12   0   46.80    3.70
 -12  -3   0   47.70    4.30
 -12  -3   0   50.39    4.20
 -15  13   0   38.00    2.60
  13   2   0   39.50    4.20
   2 -15   0   27.70    3.70
 -15  13   0   35.10    2.50
   2 -15   0   35.70    3.30
   2 -15   0   40.60    3.40
 -15  13   0   27.50    3.30
 -13  -2   0   38.00    4.10
  15 -13   0   39.80    6.00
 -13  -2   0   37.90    4.40
  -2  15   0   39.50    3.40
  15 -13   0   37.40    3.60
 -13  -2   0   45.80    4.10
 -15  14   0  167.58    6.90
 -15  14   0  167.58    7.90
 -15  14   0  169.88    6.80
  14   1   0  163.28    8.10
   1 -15   0  178.38    7.90
   1 -15   0  161.88    7.70
   1 -15   0  185.38    8.00
  15 -14   0  176.98    8.30
 -14  -1   0  189.48    8.00
  -1  15   0  188.28    7.80
  15 -14   0  164.68    7.80
 -14  -1   0  173.68    8.50
  15   0   0   -0.20    2.30
   0 -15   0    1.30    2.00
 -15  15   0    0.40    1.30
   0 -15   0   -0.70    2.40
 -15  15   0    2.10    1.10
   0 -15   0    4.80    2.50
 -15  15   0    0.00    2.20
  15 -15   0    0.10    2.40
 -15   0   0    2.30    2.90
 -15   0   0    5.00    2.40
   0  15   0    2.00    2.10
  15 -15   0   -0.80    1.90
  15 -16   0   39.80    3.80
  15 -16   0   44.80    4.70
 -16   1   0   46.40    3.80
 -16   1   0   40.00    4.10
   1  15   0   45.60    4.20
 -15  16   0   43.80    2.50
  -1 -15   0   47.60    3.90
  -1 -15   0   45.50    3.90
 -15  16   0   45.80    4.40
 -15  16   0   48.10    2.80
  16  -1   0   49.50    4.90
  -1 -15   0   42.80    4.10
 -16   2   0    1.90    2.30
  14 -16   0    0.80    2.10
   2  14   0   -1.60    2.30
  14 -16   0   -1.30    2.30
 -14  16   0    1.60    1.10
 -14  16   0    2.70    2.30
  -2 -14   0    5.60    2.20
  -2 -14   0    0.30    2.10
  16  -2   0   -0.20    2.50
  -2 -14   0    4.70    2.50
 -14  16   0    0.50    1.30
 -16   3   0  109.89    6.10
  13 -16   0  103.69    5.60
 -16   3   0  122.99    5.90
  13 -16   0  109.89    5.30
  13 -16   0  112.79    6.30
   3  13   0  122.09    6.10
  -3 -13   0  132.19    6.30
  -3 -13   0  108.19    6.20
  -3 -13   0  110.49    5.80
 -13  16   0  112.29    4.90
  16  -3   0  121.29    6.80
 -13  16   0  118.69    6.30
 -13  16   0  110.09    4.60
   4  12   0   14.20    2.80
  12 -16   0   18.90    3.00
 -16   4   0   17.80    3.20
  12 -16   0   16.20    2.20
 -16   4   0   26.20    3.30
  12 -16   0   14.90    2.80
  -4 -12   0   24.30    3.10
 -12  16   0   17.40    1.90
  -4 -12   0   23.20    2.90
  16  -4   0   26.40    3.60
 -12  16   0   20.90    3.00
 -12  16   0   18.80    2.10
  -4 -12   0   16.50    2.60
 -16   5   0   46.20    3.70
  11 -16   0   46.60    3.00
  11 -16   0   45.10    3.90
   5  11   0   47.60    3.70
 -16   5   0   50.09    4.10
  11 -16   0   46.10    3.40
  -5 -11   0   42.80    3.90
 -11  16   0   40.10    2.50
  -5 -11   0   43.50    3.60
  -5 -11   0   42.30    3.90
 -11  16   0   45.30    3.90
  16  -5   0   53.39    4.90
 -16   6   0   29.40    3.50
  10 -16   0   28.40    3.30
   6  10   0   24.30    3.10
  10 -16   0   24.50    3.10
 -16   6   0   33.40    3.20
  10 -16   0   26.30    2.50
  16  -6   0   28.10    3.50
  -6 -10   0   29.70    3.20
  -6 -10   0   27.90    3.20
  -6 -10   0   30.90    3.60
 -10  16   0   28.50    3.40
   9 -16   0   67.29    3.70
   9 -16   0   62.69    4.10
 -16   7   0   67.79    4.50
   7   9   0   60.99    4.50
   9 -16   0   65.39    4.30
 -16   7   0   64.39    4.80
  -9  16   0   63.29    4.30
  -7  -9   0   61.99    4.30
  16  -7   0   58.59    4.60
  -7  -9   0   57.49    4.20
  -7  -9   0   60.69    4.40
  -9  16   0   60.79    3.20
   8   8   0   20.80    3.00
 -16   8   0   18.70    2.90
   8 -16   0   16.20    2.60
   8 -16   0   20.80    2.60
 -16   8   0   24.50    2.60
   8 -16   0   18.00    2.90
  -8  16   0   18.60    2.60
  16  -8   0   15.90    2.90
  -8  -8   0   22.20    2.80
  -8  -8   0   16.80    2.90
  -8  16   0   20.20    2.10
  -8  -8   0   19.00    3.00
 -16   9   0   72.09    3.80
   9   7   0   68.49    4.70
 -16   9   0   61.89    4.40
   7 -16   0   62.19    4.20
   7 -16   0   68.99    4.00
   7 -16   0   66.19    4.50
  16  -9   0   68.39    4.30
  -9  -7   0   61.19    4.70
  -7  16   0   60.19    4.20
  16  -9   0   55.19    5.00
  -9  -7   0   64.79    4.30
   6 -16   0   24.70    2.80
   6 -16   0   26.40    3.20
 -16  10   0   31.90    3.30
  10   6   0   29.90    3.50
   6 -16   0   34.40    3.20
 -16  10   0   22.60    3.00
 -16  10   0   31.10    2.70
 -10  -6   0   25.30    3.40
  -6  16   0   32.20    3.40
  16 -10   0   29.40    2.90
  16 -10   0   26.50    3.40
 -10  -6   0   26.10    3.30
  16 -10   0   34.40    3.10
 -10  -6   0   28.60    3.30
 -16  11   0   47.50    3.40
   5 -16   0   47.10    3.50
  11   5   0   51.29    4.00
 -16  11   0   50.39    4.00
   5 -16   0   46.70    3.70
 -16  11   0   44.60    3.00
   5 -16   0   49.70    3.90
  16 -11   0   52.29    4.80
  -5  16   0   46.30    3.40
 -11  -5   0   45.70    3.80
 -11  -5   0   44.50    4.20
  16 -11   0   48.10    3.80
 -11  -5   0   45.10    4.40
  12   4   0   19.40    2.90
   4 -16   0   22.90    3.20
 -16  12   0   19.90    2.30
 -16  12   0   24.60    2.50
 -16  12   0   21.20    2.90
   4 -16   0   20.60    2.80
   4 -16   0   18.30    2.70
  -4  16   0   21.70    2.80
  16 -12   0   23.20    2.80
 -12  -4   0   19.80    2.90
 -12  -4   0   18.00    3.10
 -16  13   0  113.19    4.90
   3 -16   0  115.29    6.00
   3 -16   0  116.39    5.80
 -16  13   0  116.59    6.40
  13   3   0  116.09    6.30
   3 -16   0  117.29    6.00
  16 -13   0  108.99    5.90
 -13  -3   0  121.79    6.00
 -13  -3   0  115.49    6.10
  16 -13   0  110.49    6.50
  -3  16   0  120.09    5.90
 -13  -3   0  106.89    6.40
   2 -16   0   -0.70    2.30
   2 -16   0   -0.50    2.30
 -16  14   0   -0.20    1.20
  14   2   0    1.30    2.40
 -16  14   0    0.60    2.20
   2 -16   0    3.00    2.20
  16 -14   0   -1.20    2.60
  -2  16   0    1.00    2.00
  16 -14   0   -0.40    1.90
 -14  -2   0   -5.00    2.20
 -14  -2   0    2.00    2.20
  15   1   0   40.50    4.70
   1 -16   0   42.50    3.70
   1 -16   0   41.10    4.10
 -16  15   0   41.50    4.40
   1 -16   0   41.70    4.00
 -16  15   0   43.10    2.70
 -16  15   0   45.20    2.70
  -1  16   0   45.60    3.70
  16 -15   0   48.80    4.80
 -15  -1   0   43.10    3.90
  16 -15   0   41.90    3.80
 -15  -1   0   47.20    4.30
 -16  16   0    5.90    2.40
  16   0   0    5.10    2.70
   0 -16   0    6.90    2.70
 -16  16   0    4.20    1.30
   0 -16   0    4.60    2.60
   0  16   0    4.40    2.20
 -16   0   0    4.30    2.80
 -16   0   0    5.50    2.60
  16 -16   0    5.40    2.20
  16 -16   0    5.20    2.60
  16 -17   0   15.90    3.40
 -17   1   0    9.60    2.80
 -17   1   0    8.80    2.60
   1  16   0   11.80    2.80
 -16  17   0   12.60    2.90
  -1 -16   0   13.30    2.90
  -1 -16   0    9.70    2.90
  17  -1   0    7.90    3.00
 -16  17   0   14.00    1.60
  -1 -16   0   10.40    2.70
 -16  17   0   12.90    1.80
  15 -17   0   33.90    3.30
  15 -17   0   48.10    4.80
 -17   2   0   37.10    4.00
   2  15   0   41.10    3.70
 -17   2   0   45.20    4.20
  -2 -15   0   48.10    4.30
 -15  17   0   35.50    2.80
  17  -2   0   46.60    4.90
 -15  17   0   37.60    2.30
 -15  17   0   45.70    4.30
  -2 -15   0   40.40    4.00
  -2 -15   0   32.60    4.30
   3  14   0   49.80    4.30
  14 -17   0   50.39    4.40
 -17   3   0   47.80    4.20
  14 -17   0   39.60    3.50
  14 -17   0   42.60    4.00
 -17   3   0   54.89    4.30
  -3 -14   0   49.40    4.10
 -14  17   0   46.50    2.50
 -14  17   0   54.59    4.20
 -14  17   0   50.69    2.90
  17  -3   0   49.00    4.60
 -17   4   0    7.90    3.40
 -17   4   0    6.60    2.40
  13 -17   0    6.90    2.50
  13 -17   0    7.20    1.50
   4  13   0    6.30    2.50
  13 -17   0    5.20    2.20
 -13  17   0    4.10    1.20
 -13  17   0    5.50    2.60
  -4 -13   0    4.50    2.80
  -4 -13   0    3.20    2.50
  17  -4   0   11.20    3.10
 -13  17   0    6.10    1.50
  12 -17   0   37.50    4.30
  12 -17   0   39.30    2.90
 -17   5   0   45.00    3.80
   5  12   0   47.20    4.10
  12 -17   0   45.40    4.50
 -17   5   0   37.40    3.80
  -5 -12   0   42.30    4.10
 -12  17   0   35.40    2.40
  -5 -12   0   42.40    4.00
  17  -5   0   50.69    4.40
 -12  17   0   43.10    3.70
 -17   6   0   -2.20    2.00
  11 -17   0    3.10    2.20
  11 -17   0    0.00    2.40
   6  11   0   -4.10    2.30
  11 -17   0    0.20    1.40
 -17   6   0    0.60    2.50
  -6 -11   0    1.00    2.40
  17  -6   0    0.20    2.60
  -6 -11   0   -2.50    2.30
 -11  17   0    0.80    2.00
  10 -17   0   32.20    3.40
 -17   7   0   29.40    3.20
   7  10   0   35.30    3.90
  10 -17   0   30.90    3.60
  10 -17   0   30.10    2.80
 -17   7   0   34.30    3.70
 -10  17   0   31.30    2.40
  -7 -10   0   31.40    3.80
  -7 -10   0   33.70    3.50
  -7 -10   0   32.00    5.10
  17  -7   0   39.60    4.10
 -10  17   0   36.30    3.70
 -17   8   0   66.79    4.70
   9 -17   0   71.59    4.60
   9 -17   0   61.69    4.00
   9 -17   0   61.39    4.10
   8   9   0   69.79    4.50
 -17   8   0   67.19    4.70
  17  -8   0   64.59    5.40
  -8  -9   0   60.89    5.60
  -8  -9   0   68.09    4.60
  -9  17   0   73.09    4.60
  -8  -9   0   60.99    4.30
   8 -17   0   62.29    4.10
   8 -17   0   68.39    4.70
   8 -17   0   63.69    4.00
 -17   9   0   74.59    4.10
 -17   9   0   68.39    5.00
   9   8   0   65.29    4.50
  -9  -8   0   55.99    4.40
  17  -9   0   55.79    4.80
  -9  -8   0   69.59    5.10
  -8  17   0   61.49    4.10
  -9  -8   0   60.49    4.70
 -17  10   0   33.10    4.10
   7 -17   0   34.10    3.30
   7 -17   0   35.70    3.50
 -17  10   0   34.20    3.00
  10   7   0   36.80    4.10
   7 -17   0   29.50    3.20
 -10  -7   0   32.70    3.60
  -7  17   0   35.30    3.60
  17 -10   0   41.90    5.10
 -10  -7   0   26.80    3.80
 -10  -7   0   37.20    3.60
   6 -17   0   -1.50    1.90
   6 -17   0    2.70    2.00
 -17  11   0    2.60    1.60
   6 -17   0    1.10    2.30
  11   6   0   -1.70    2.50
 -17  11   0    1.90    2.50
 -11  -6   0    1.10    2.40
  17 -11   0   -2.10    2.80
  -6  17   0    3.00    2.00
 -11  -6   0    0.70    2.40
 -11  -6   0   -0.80    2.20
 -17  12   0   44.20    4.00
   5 -17   0   50.99    4.20
 -17  12   0   42.70    3.20
 -17  12   0   44.30    3.00
   5 -17   0   40.90    3.70
  12   5   0   42.60    4.10
   5 -17   0   38.00    3.80
 -12  -5   0   41.90    4.50
 -12  -5   0   36.80    3.90
  -5  17   0   41.60    3.50
  17 -12   0   44.30    4.40
 -12  -5   0   45.20    3.90
   4 -17   0    4.80    2.50
 -17  13   0    7.30    1.60
  13   4   0    0.50    2.70
   4 -17   0    7.90    2.40
   4 -17   0    3.40    2.30
 -17  13   0    6.80    1.50
 -17  13   0    7.60    2.80
 -13  -4   0    5.50    3.00
  17 -13   0    8.40    2.80
  -4  17   0    6.70    2.50
 -13  -4   0    6.00    2.70
 -13  -4   0    4.10    2.40
   3 -17   0   48.80    4.10
  14   3   0   49.90    4.30
   3 -17   0   41.30    3.80
   3 -17   0   53.19    4.30
 -17  14   0   47.60    4.70
 -17  14   0   44.80    2.90
 -14  -3   0   55.29    4.30
  17 -14   0   38.70    4.40
  -3  17   0   48.80    4.10
 -14  -3   0   54.49    4.20
   2 -17   0   41.70    4.20
 -17  15   0   47.40    2.90
 -17  15   0   37.70    2.60
  15   2   0   34.50    4.00
   2 -17   0   39.20    4.10
 -17  15   0   33.50    4.00
 -15  -2   0   38.00    4.00
  -2  17   0   45.80    4.00
  17 -15   0   44.30    4.50
 -15  -2   0   38.40    4.00
   1 -17   0   13.20    2.70
 -17  16   0    9.10    2.60
   1 -17   0   11.50    2.60
   1 -17   0   11.60    3.00
 -17  16   0   10.00    1.50
  16   1   0    9.40    3.20
 -16  -1   0    9.50    3.00
  -1  17   0   12.90    2.70
  17 -16   0   14.90    3.10
 -16  -1   0    7.70    3.10
   0 -17   0   18.10    2.70
 -17  17   0   18.60    1.70
  17   0   0   18.00    3.40
   0 -17   0   13.20    2.90
   0 -17   0   16.20    3.10
 -17  17   0   17.90    3.20
  17 -17   0   13.40    3.20
 -17   0   0   12.10    5.20
   0  17   0   13.70    2.70
 -17   0   0   18.20    3.40
   1  17   0    7.30    2.40
 -18   1   0    6.70    3.00
  17 -18   0    5.60    2.70
 -18   1   0   13.70    3.40
  -1 -17   0   10.10    3.50
 -17  18   0   12.50    2.80
  -1 -17   0   11.90    2.70
 -18   2   0   21.50    3.80
   2  16   0   22.00    3.20
  16 -18   0   17.50    3.50
 -18   2   0   17.20    2.80
 -16  18   0   18.50    1.70
  -2 -16   0   25.20    3.30
  18  -2   0   18.60    3.60
  -2 -16   0   17.10    2.90
  -2 -16   0   11.10    3.20
 -16  18   0   11.70    2.80
 -18   3   0   38.50    4.20
  15 -18   0   32.00    3.30
   3  15   0   41.50    3.80
  15 -18   0   40.80    4.80
 -18   3   0   38.90    4.70
  -3 -15   0   42.90    4.50
  18  -3   0   48.20    5.30
  -3 -15   0   48.70    4.30
 -15  18   0   42.30    2.90
 -15  18   0   41.50    2.30
 -15  18   0   47.70    4.50
  -3 -15   0   46.10    4.40
   4  14   0    7.50    2.70
 -18   4   0    5.30    2.90
  14 -18   0    5.40    2.60
 -18   4   0    6.50    2.50
  14 -18   0    9.20    1.50
  14 -18   0    6.10    2.10
  18  -4   0    9.50    3.40
  -4 -14   0    3.70    2.50
 -14  18   0    6.60    1.20
  -4 -14   0   10.80    2.70
 -14  18   0    7.70    2.70
 -14  18   0    8.20    1.50
  13 -18   0   35.20    4.00
   5  13   0   40.30    3.70
 -18   5   0   45.10    3.90
  13 -18   0   43.80    2.90
  13 -18   0   42.40    3.80
 -18   5   0   43.60    4.10
  -5 -13   0   34.30    4.50
 -13  18   0   43.10    2.80
  -5 -13   0   46.70    3.90
 -13  18   0   42.90    3.80
  -5 -13   0   43.30    3.90
  18  -5   0   42.80    4.50
 -13  18   0   41.50    2.50
 -18   6   0    0.50    2.10
  12 -18   0    1.00    1.20
 -18   6   0    0.10    2.80
  12 -18   0    2.60    2.20
  12 -18   0   -0.80    2.50
   6  12   0   -0.30    2.40
  -6 -12   0   -2.30    2.40
  -6 -12   0   -2.40    2.60
 -12  18   0    2.30    2.10
  -6 -12   0    2.10    2.30
  18  -6   0    1.50    2.50
  11 -18   0   66.49    3.80
   7  11   0   64.79    4.80
  11 -18   0   63.39    4.60
  11 -18   0   53.19    4.10
 -18   7   0   65.49    4.80
 -18   7   0   62.19    4.20
 -11  18   0   62.89    3.30
  -7 -11   0   74.99    5.20
  -7 -11   0   65.79    4.80
 -11  18   0   68.89    4.80
  -7 -11   0   69.99    4.90
  18  -7   0   60.19    6.40
 -18   8   0   13.60    2.30
  10 -18   0   18.60    3.10
  10 -18   0   13.20    2.00
 -18   8   0   16.90    3.00
   8  10   0   12.10    2.70
  -8 -10   0   12.10    2.70
 -10  18   0   11.20    1.70
 -10  18   0   10.60    2.50
  -8 -10   0   15.50    2.90
  -8 -10   0   10.70    2.90
   9   9   0  111.49    6.10
   9 -18   0   94.39    5.20
 -18   9   0  105.39    5.20
   9 -18   0  101.99    5.70
 -18   9   0   98.59    6.00
  18  -9   0   98.79    6.50
  -9  18   0  108.39    5.80
  -9  -9   0  116.19    5.90
  -9  -9   0  101.29    5.80
  -9  -9   0   93.79    5.50
 -18  10   0   11.70    2.40
   8 -18   0   11.40    2.30
  10   8   0   15.50    3.20
   8 -18   0   12.90    2.90
   8 -18   0   14.10    3.00
 -18  10   0    9.50    2.80
 -10  -8   0   11.70    3.00
 -10  -8   0   17.20    2.90
  18 -10   0    4.80    2.90
 -10  -8   0   10.70    2.60
  -8  18   0    9.00    2.60
   7 -18   0   59.09    4.90
  11   7   0   68.09    4.70
 -18  11   0   59.09    4.70
   7 -18   0   63.49    4.90
 -18  11   0   55.99    3.80
   7 -18   0   66.49    4.80
 -11  -7   0   71.69    5.00
 -11  -7   0   72.19    4.80
  -7  18   0   68.19    4.30
  18 -11   0   52.89    5.00
 -11  -7   0   66.39    4.90
 -18  12   0    0.50    1.60
   6 -18   0   -2.00    1.90
 -18  12   0   -4.90    2.40
   6 -18   0   -1.60    2.50
   6 -18   0   -2.80    2.20
  12   6   0   -1.20    2.30
  -6  18   0    1.30    2.00
 -12  -6   0    0.40    2.20
  18 -12   0    0.40    2.80
 -12  -6   0   -2.90    2.70
 -12  -6   0   -2.00    2.10
   5 -18   0   46.80    4.20
   5 -18   0   44.10    3.90
  13   5   0   49.30    4.60
 -18  13   0   46.00    4.60
 -18  13   0   40.30    3.00
 -18  13   0   45.70    3.20
 -13  -5   0   48.60    4.50
  -5  18   0   48.10    4.00
  18 -13   0   41.50    4.50
 -18  14   0   11.60    2.70
  14   4   0    9.30    2.80
   4 -18   0    8.60    2.50
   4 -18   0    7.40    2.40
 -18  14   0   10.30    1.70
 -18  14   0    7.90    1.60
 -14  -4   0    5.50    2.60
  -4  18   0    4.70    2.20
  18 -14   0    6.20    2.90
 -14  -4   0    1.20    3.40
  15   3   0   43.20    4.30
   3 -18   0   41.20    4.40
   3 -18   0   45.10    3.90
 -18  15   0   35.80    2.80
 -18  15   0   49.90    4.80
   3 -18   0   44.80    4.00
 -15  -3   0   49.20    4.30
  18 -15   0   46.90    4.70
 -15  -3   0   36.90    4.60
  -3  18   0   52.69    4.20
   2 -18   0   23.70    3.20
 -18  16   0   18.50    3.10
   2 -18   0   21.20    3.00
   2 -18   0   15.90    3.00
 -18  16   0   14.60    2.10
  16   2   0   26.90    3.80
  -2  18   0   21.30    2.80
  18 -16   0   17.80    3.40
 -16  -2   0   13.80    3.30
 -16  -2   0   20.40    3.50
   1 -18   0   11.50    2.90
  17   1   0   16.80    3.20
   1 -18   0   11.50    2.90
 -18  17   0   10.50    3.00
 -17  -1   0    8.60    2.90
 -17  -1   0   10.00    2.80
  -1  18   0   11.20    2.80
  18 -17   0   11.90    3.10
 -18  18   0   11.10    3.20
   0 -18   0   11.60    3.00
   0 -18   0   17.00    4.80
 -18   0   0   12.80    3.30
 -18   0   0   11.90    3.10
  18 -18   0   11.80    3.50
   0  18   0   12.60    2.70
 -19   1   0   12.80    3.40
 -19   1   0   12.10    3.20
   1  18   0   10.60    2.60
  18 -19   0    4.90    2.90
  -1 -18   0    7.20    3.60
  19  -1   0   13.80    3.50
 -18  19   0    8.40    2.90
  -1 -18   0   13.10    2.80
   2  17   0    6.20    2.50
 -19   2   0    4.40    2.80
  17 -19   0    8.00    3.00
 -19   2   0    4.90    2.90
  -2 -17   0   10.50    3.00
 -17  19   0    7.20    2.50
  19  -2   0   10.30    3.30
  -2 -17   0    6.00    2.60
  16 -19   0   11.00    3.10
 -19   3   0   12.90    3.10
   3  16   0   15.10    3.10
 -16  19   0   12.60    3.10
  -3 -16   0   11.10    2.80
  19  -3   0   13.60    3.60
  -3 -16   0   13.60    2.90
  15 -19   0   20.50    3.50
 -19   4   0   17.00    3.30
 -19   4   0   23.20    3.30
   4  15   0   27.60    3.50
  -4 -15   0   24.90    3.50
 -15  19   0   26.40    2.30
 -15  19   0   19.70    3.40
  19  -4   0   24.20    4.10
 -15  19   0   22.10    1.80
  14 -19   0    3.50    2.10
  14 -19   0    3.40    2.50
 -19   5   0    4.70    2.30
 -19   5   0    7.60    3.00
   5  14   0    0.30    2.20
  14 -19   0    5.50    1.40
 -14  19   0    3.90    1.20
  -5 -14   0   11.20    2.80
 -14  19   0    2.80    2.70
 -14  19   0    5.20    1.40
  -5 -14   0    6.60    2.40
  19  -5   0    3.60    3.10
  -5 -14   0    5.50    2.60
 -19   6   0   13.00    3.20
  13 -19   0    9.80    1.60
   6  13   0    9.00    2.60
  13 -19   0    7.30    2.40
 -19   6   0    9.30    2.40
  13 -19   0    8.40    2.70
  -6 -13   0   13.10    2.80
 -13  19   0   10.00    1.60
  -6 -13   0    9.60    2.40
 -13  19   0    8.60    2.50
  -6 -13   0    5.50    2.60
  19  -6   0   12.50    3.10
 -19   7   0    7.50    3.10
 -19   7   0    8.90    2.30
  12 -19   0   10.90    1.70
   7  12   0   14.40    2.90
  12 -19   0    9.80    2.30
  12 -19   0   12.80    3.10
  19  -7   0   12.60    3.00
 -12  19   0    8.00    1.50
  -7 -12   0   10.40    2.80
  -7 -12   0   13.20    2.80
 -12  19   0    8.60    2.40
  -7 -12   0   12.90    2.90
   8  11   0   13.30    2.50
 -19   8   0   10.90    2.30
  11 -19   0   14.60    3.10
  11 -19   0   16.20    2.20
  11 -19   0   12.40    2.30
 -11  19   0   14.70    2.60
  -8 -11   0   15.30    2.70
  -8 -11   0   16.70    3.20
  19  -8   0   14.10    3.30
 -11  19   0   13.20    1.70
  -8 -11   0   14.10    2.60
  10 -19   0   12.40    2.70
  10 -19   0   15.70    2.50
   9  10   0   14.30    2.70
  10 -19   0   15.10    2.10
 -19   9   0   12.80    2.20
 -19   9   0   16.60    3.10
  19  -9   0   10.10    3.10
 -10  19   0   16.60    2.70
  -9 -10   0   17.10    2.70
  -9 -10   0   13.80    2.90
  -9 -10   0   13.20    2.60
  10   9   0   15.00    2.70
   9 -19   0   16.80    2.80
   9 -19   0   13.70    2.40
 -19  10   0   12.90    2.90
   9 -19   0   14.80    2.20
 -19  10   0   10.30    2.20
 -10  -9   0   17.50    3.00
  -9  19   0   17.20    2.80
  19 -10   0   16.80    3.70
 -10  -9   0   18.10    2.80
 -10  -9   0   17.00    2.70
 -19  11   0    7.80    3.60
   8 -19   0   13.40    2.70
 -19  11   0   11.80    3.20
  11   8   0   16.60    2.80
   8 -19   0   15.10    2.60
  19 -11   0    9.30    3.20
 -11  -8   0   17.10    2.80
 -11  -8   0   17.20    3.10
 -11  -8   0   13.40    3.20
  -8  19   0   19.40    2.80
 -19  12   0    8.10    2.70
 -19  12   0    7.30    1.90
   7 -19   0   11.80    2.60
   7 -19   0   10.20    2.70
  12   7   0    8.00    2.50
   7 -19   0    9.10    2.30
 -12  -7   0   16.60    3.10
  -7  19   0   10.40    2.40
 -12  -7   0    7.80    2.70
  19 -12   0    8.30    2.90
   6 -19   0   12.70    2.30
 -19  13   0   10.10    1.90
   6 -19   0    8.00    2.70
 -19  13   0    9.90    2.70
   6 -19   0    6.80    2.40
  13   6   0   12.40    2.90
 -13  -6   0    4.70    3.00
 -13  -6   0   12.50    2.80
  19 -13   0   15.20    3.20
  -6  19   0   11.60    2.70
 -19  14   0    6.00    2.60
   5 -19   0    4.80    2.30
   5 -19   0    6.30    2.30
   5 -19   0    5.60    2.40
  14   5   0    4.50    2.50
 -14  -5   0    4.70    2.40
 -14  -5   0   -0.70    2.60
  -5  19   0    6.40    2.30
  19 -14   0    4.70    3.10
 -19  15   0   23.60    3.30
  15   4   0   25.00    3.40
   4 -19   0   23.70    3.10
 -19  15   0   18.20    2.40
   4 -19   0   17.70    2.90
 -15  -4   0   21.40    3.20
  19 -15   0   20.80    3.70
  -4  19   0   21.70    2.90
 -15  -4   0   20.00    3.20
 -19  16   0    9.20    1.60
 -19  16   0   17.20    3.40
   3 -19   0   13.20    2.90
  16   3   0   16.10    3.40
   3 -19   0   11.00    2.60
 -16  -3   0   10.30    3.00
  19 -16   0   12.40    3.30
 -16  -3   0   16.50    3.30
  -3  19   0   15.00    2.70
 -19  17   0    6.20    1.40
  17   2   0    7.10    2.90
 -19  17   0    7.60    3.10
   2 -19   0    8.70    2.90
   2 -19   0    6.90    2.70
 -17  -2   0    2.10    2.90
  19 -17   0    8.30    3.40
 -17  -2   0    6.00    2.90
  -2  19   0    8.80    2.80
  18   1   0   13.90    3.60
 -19  18   0   11.20    3.50
   1 -19   0   11.20    3.80
 -18  -1   0    9.70    2.90
  -1  19   0   10.60    2.60
  19 -18   0   17.30    3.70
 -18  -1   0    8.30    2.90
  19   0   0    6.70    3.20
 -19  19   0   -1.20    2.80
   0 -19   0    3.90    2.70
   0 -19   0    3.90    2.60
  19 -19   0    0.00    2.90
 -19   0   0    1.80    2.70
 -19   0   0   -2.00    2.90
   0  19   0    2.60    2.40
   1  19   0   -2.40    2.60
 -20   1   0   -4.20    2.80
 -20   1   0    0.10    3.00
  -1 -19   0   -1.50    2.80
  -1 -19   0    0.90    2.70
  20  -1   0    6.80    3.20
 -19  20   0   -0.90    2.60
 -20   2   0    0.80    2.90
  18 -20   0    4.80    3.30
   2  18   0    4.80    2.90
 -20   2   0    4.30    3.00
  20  -2   0    4.40    3.40
  -2 -18   0    0.70    2.80
 -18  20   0    1.00    3.00
  -2 -18   0   -0.40    2.80
  17 -20   0   16.80    3.80
   3  17   0   19.20    3.40
 -20   3   0   17.20    3.20
 -20   3   0   16.60    3.80
  -3 -17   0   21.40    3.50
  20  -3   0   18.20    3.70
 -17  20   0   15.90    3.10
  -3 -17   0   25.10    5.60
 -20   4   0    5.90    3.00
   4  16   0    3.40    2.80
 -20   4   0    2.60    3.00
  16 -20   0   -0.70    2.50
 -16  20   0    2.30    2.50
  20  -4   0    3.70    3.00
  -4 -16   0    1.20    2.60
  -4 -16   0    1.40    2.80
  15 -20   0   29.60    3.00
 -20   5   0   29.70    3.80
  15 -20   0   21.20    3.50
 -20   5   0   19.00    3.50
   5  15   0   27.80    3.50
  -5 -15   0   21.50    3.30
  -5 -15   0   31.20    3.70
  20  -5   0   27.60    4.00
 -15  20   0   24.40    3.70
 -15  20   0   25.40    2.30
 -20   6   0   -1.10    2.90
  14 -20   0    4.60    1.40
 -20   6   0    3.90    2.40
   6  14   0    5.00    2.40
  14 -20   0    2.10    2.70
  20  -6   0    3.30    3.10
 -14  20   0    5.50    1.60
  -6 -14   0    2.50    2.50
 -14  20   0    2.10    2.50
  -6 -14   0    7.10    2.60
 -20   7   0   10.90    2.50
  13 -20   0    9.90    1.60
 -20   7   0   10.60    3.00
  13 -20   0    9.80    2.80
   7  13   0    6.60    2.50
  -7 -13   0    8.10    2.60
  20  -7   0   11.80    3.60
 -13  20   0    9.40    2.80
  -7 -13   0    7.70    2.80
   8  12   0    5.60    2.50
 -20   8   0    6.60    2.70
 -20   8   0    4.40    2.20
  12 -20   0    9.70    2.70
 -12  20   0    4.20    1.60
  -8 -12   0   12.50    2.70
  20  -8   0    5.50    2.90
 -12  20   0    4.40    2.60
  -8 -12   0    1.80    2.60
 -20   9   0    5.10    2.20
   9  11   0    6.20    2.40
  11 -20   0   10.00    1.90
 -20   9   0    6.70    3.10
  11 -20   0    7.70    2.60
  -9 -11   0    9.60    2.60
 -11  20   0    6.00    2.50
  20  -9   0    7.00    3.10
  -9 -11   0    7.20    2.80
  10  10   0    7.60    2.50
  10 -20   0    7.70    1.90
 -20  10   0    5.60    2.10
  10 -20   0    9.40    2.90
 -20  10   0    3.60    2.60
  20 -10   0    7.10    3.30
 -10  20   0    8.30    2.30
 -10 -10   0    8.70    3.00
 -10 -10   0   10.20    2.50
   9 -20   0    7.40    2.90
  11   9   0    6.30    2.50
 -20  11   0    7.30    2.00
 -11  -9   0    8.90    3.00
 -11  -9   0   13.60    3.00
  -9  20   0    7.70    2.30
  20 -11   0    8.20    3.00
 -20  12   0    5.50    1.90
  12   8   0    7.90    2.90
   8 -20   0   10.10    2.50
   8 -20   0    8.40    2.10
 -20  12   0    7.10    3.60
 -12  -8   0    9.90    2.60
 -12  -8   0    6.00    2.70
  -8  20   0    8.40    2.60
  20 -12   0    7.20    3.30
   7 -20   0    8.90    2.80
 -20  13   0    4.00    3.00
 -20  13   0    5.50    1.90
   7 -20   0   11.30    2.40
  13   7   0   10.20    2.70
  -7  20   0    6.50    2.30
 -13  -7   0    6.20    2.70
  20 -13   0   11.70    3.10
 -20  14   0    3.30    1.70
   6 -20   0    6.90    2.30
   6 -20   0    4.10    2.20
 -20  14   0    3.20    2.80
  14   6   0    4.20    2.60
  20 -14   0    0.70    2.70
 -14  -6   0    7.70    2.90
  -6  20   0    7.50    2.30
 -14  -6   0    1.60    2.60
   5 -20   0   29.20    3.50
  15   5   0   27.60    3.60
   5 -20   0   30.20    3.60
 -20  15   0   22.50    2.60
 -20  15   0   27.40    3.80
 -15  -5   0   30.40    3.90
  -5  20   0   31.20    3.80
  20 -15   0   32.20    4.30
 -15  -5   0   27.30    3.80
  16   4   0    5.80    2.70
   4 -20   0    3.50    2.40
 -20  16   0    1.80    2.60
   4 -20   0    3.00    2.50
 -20  16   0   -0.70    1.40
  20 -16   0    0.60    3.10
 -16  -4   0   -2.40    2.90
  -4  20   0    1.50    2.20
 -16  -4   0    5.50    2.70
 -20  17   0   19.50    3.40
 -20  17   0   16.80    2.20
   3 -20   0   21.20    3.20
 -17  -3   0   15.70    3.20
 -17  -3   0   20.40    3.70
  -3  20   0   19.40    3.30
  20 -17   0   15.30    3.70
   2 -20   0    3.50    2.60
  18   2   0    8.50    3.20
 -20  18   0    2.50    2.70
   2 -20   0    2.10    3.10
  20 -18   0    1.40    2.90
  -2  20   0    1.40    2.40
 -18  -2   0    2.00    3.10
 -18  -2   0    9.70    3.20
   1 -20   0   -0.70    2.60
 -20  19   0    0.70    2.80
  19   1   0    4.30    3.20
   1 -20   0   -5.80    2.30
  -1  20   0   -4.00    2.50
 -19  -1   0   -5.80    3.00
 -19  -1   0   -2.30    2.60
  20 -19   0    2.80    3.20
 -21   3   0    0.80    2.50
 -21   3   0    6.00    3.20
   3  18   0    1.70    2.70
  18 -21   0   -1.40    2.70
  21  -3   0    6.80    3.40
  -3 -18   0    1.90    2.90
 -18  21   0    6.70    3.30
  -3 -18   0    1.30    2.90
 -21   4   0   12.00    3.70
 -21   4   0    2.00    2.40
   4  17   0    5.10    2.70
  21  -4   0    4.30    3.50
  -4 -17   0    2.20    3.00
  -4 -17   0   -0.30    2.80
 -17  21   0    1.70    2.70
  16 -21   0    6.10    3.10
   5  16   0   10.80    3.10
 -21   5   0    8.00    2.70
 -21   5   0    8.00    3.10
  -5 -16   0    6.40    3.20
  21  -5   0    8.70    3.30
 -16  21   0    5.20    2.90
 -21   6   0   14.40    3.30
  15 -21   0   11.00    1.80
  15 -21   0    7.40    2.90
   6  15   0   14.50    3.10
 -21   6   0   18.80    3.60
 -15  21   0   12.90    3.20
  21  -6   0   12.70    3.70
 -15  21   0   15.90    2.10
  -6 -15   0   12.60    3.40
  -6 -15   0    9.70    2.80
 -21   7   0    0.50    2.40
 -21   7   0    2.40    2.70
  14 -21   0    7.50    1.50
   7  14   0    4.50    2.80
  14 -21   0    2.40    2.90
  21  -7   0    3.60    3.00
 -14  21   0    5.10    2.60
 -14  21   0    4.60    1.50
  -7 -14   0    4.60    2.70
  -7 -14   0   -1.50    3.00
 -21   8   0    9.50    2.50
  13 -21   0   11.40    1.80
   8  13   0    6.80    3.00
 -21   8   0    6.80    3.20
  21  -8   0   15.40    3.70
  -8 -13   0   12.30    3.10
  -8 -13   0   11.00    3.00
 -13  21   0   15.40    3.00
   9  12   0    3.10    2.70
  12 -21   0    1.90    1.60
 -21   9   0   -2.70    2.20
  12 -21   0   -4.60    2.30
 -21   9   0   -0.70    2.60
  -9 -12   0   -1.70    3.00
  -9 -12   0    5.20    2.50
 -12  21   0    1.10    2.60
  21  -9   0    1.80    2.80
  10  11   0    5.40    2.50
 -21  10   0    1.00    2.00
  11 -21   0    8.70    1.90
 -21  10   0    1.40    2.70
  11 -21   0    1.60    2.80
 -10 -11   0    5.70    2.80
 -11  21   0    8.70    2.50
  21 -10   0    9.10    3.50
 -10 -11   0    3.90    2.40
  10 -21   0    4.70    2.90
 -21  11   0    6.80    3.20
 -21  11   0    2.60    2.10
  11  10   0    9.20    2.80
  21 -11   0    7.00    3.00
 -10  21   0    4.80    2.60
 -11 -10   0    5.10    2.80
 -11 -10   0   10.60    2.90
  12   9   0    2.50    2.40
   9 -21   0   -3.40    2.20
 -21  12   0    1.30    3.10
   9 -21   0    3.20    2.00
 -12  -9   0   -1.50    2.60
  -9  21   0   -1.30    2.10
 -12  -9   0    6.60    2.50
  21 -12   0    2.50    3.10
   8 -21   0    7.80    3.00
 -21  13   0    7.80    2.00
  13   8   0   16.60    3.30
 -21  13   0    8.80    3.40
   8 -21   0   13.80    2.40
  -8  21   0    7.80    2.70
  21 -13   0   14.10    3.60
 -13  -8   0   15.40    3.00
 -13  -8   0    5.50    2.90
   7 -21   0    3.80    3.30
   7 -21   0    6.30    2.10
 -21  14   0    3.10    2.00
  14   7   0    5.60    3.10
 -21  14   0    1.40    3.10
 -14  -7   0    5.90    2.60
 -14  -7   0    2.20    2.70
  -7  21   0    4.70    2.60
  21 -14   0   10.30    3.50
 -21  15   0   11.00    3.00
   6 -21   0   14.90    2.60
  15   6   0   13.80    3.30
 -15  -6   0   12.70    3.20
  -6  21   0   11.90    3.00
 -15  -6   0   16.60    3.10
  21 -15   0   11.90    3.60
 -21  16   0    7.20    3.40
  16   5   0   10.60    3.50
 -21  16   0    3.60    1.60
   5 -21   0    8.20    2.60
   5 -21   0    7.80    3.00
 -16  -5   0   13.50    3.30
  21 -16   0    6.50    3.20
 -16  -5   0    8.80    3.10
  -5  21   0    6.60    2.80
 -21  17   0    1.20    1.50
  17   4   0    7.20    3.60
   4 -21   0   10.20    2.60
 -21  17   0    8.60    3.50
   4 -21   0    3.60    2.70
  -4  21   0    4.00    2.40
 -17  -4   0    5.40    2.80
  21 -17   0    1.30    2.90
  18   3   0    9.00    3.20
   3 -21   0    8.00    2.70
   3 -21   0    1.70    2.70
 -21  18   0    4.30    3.30
 -18  -3   0    3.40    2.80
  -3  21   0    4.40    3.00
  21 -18   0   -3.50    3.20
 -18  -3   0   -2.60    3.10
 -22   6   0   11.40    3.10
 -22   6   0   15.40    3.80
   6  16   0   12.20    3.40
  16 -22   0   21.10    3.70
  -6 -16   0   12.70    3.30
 -16  22   0   17.20    3.60
  22  -6   0   26.40    4.40
   7  15   0    1.30    2.80
  15 -22   0    7.50    3.40
 -22   7   0    4.90    3.00
 -22   7   0    4.50    3.10
 -15  22   0    3.60    2.60
  22  -7   0   12.30    3.40
  -7 -15   0    3.30    2.80
  -7 -15   0    8.10    3.00
   8  14   0   11.00    2.80
  14 -22   0    9.40    3.20
 -22   8   0    8.50    3.10
 -22   8   0    9.40    2.60
  -8 -14   0   11.70    3.50
 -14  22   0   12.80    3.30
  -8 -14   0    8.40    3.40
 -14  22   0   10.40    1.80
   9  13   0    9.30    3.10
  13 -22   0    5.30    1.70
 -22   9   0    2.60    3.40
  13 -22   0    4.00    3.40
  -9 -13   0    6.80    3.00
 -13  22   0    6.70    2.90
  22  -9   0   11.90    3.70
 -22  10   0    1.50    3.20
  10  12   0    5.70    2.60
  12 -22   0    3.70    1.70
 -22  10   0    0.20    2.30
  12 -22   0   -0.10    2.90
 -10 -12   0    0.90    3.10
 -10 -12   0    4.70    2.80
  22 -10   0    3.10    3.10
 -12  22   0    3.00    2.80
 -22  11   0    3.10    2.20
 -22  11   0    9.70    3.50
  11 -22   0    3.40    3.40
  11  11   0    8.90    3.20
 -11 -11   0    6.80    3.20
 -11  22   0    3.70    2.90
 -11 -11   0    2.60    2.80
  22 -11   0    5.40    3.20
 -22  12   0   -1.70    2.10
  10 -22   0    1.20    2.80
  10 -22   0    4.10    1.80
 -22  12   0    5.90    3.30
  12  10   0    7.90    2.80
 -12 -10   0    3.10    2.80
 -12 -10   0    1.80    2.70
  22 -12   0    3.00    3.40
 -10  22   0    1.40    2.40
   9 -22   0    3.70    2.60
 -22  13   0    2.50    2.00
  13   9   0   12.50    3.20
   9 -22   0   10.60    2.20
 -22  13   0    6.20    3.30
 -13  -9   0    6.50    2.70
 -13  -9   0    7.10    3.00
  -9  22   0    2.60    2.50
  22 -13   0    8.50    3.60
 -22  14   0    8.10    2.10
   8 -22   0   10.50    2.90
   8 -22   0   11.60    2.40
 -22  14   0    7.20    3.00
  22 -14   0   14.20    3.80
 -14  -8   0   12.90    3.30
 -14  -8   0   17.00    3.10
  -8  22   0    7.30    2.80
   7 -22   0   10.50    2.40
   7 -22   0    7.30    2.80
  15   7   0    4.90    3.20
 -22  15   0    4.60    2.90
  22 -15   0    8.00    3.40
 -15  -7   0    8.00    3.50
 -15  -7   0    5.30    3.10
  -7  22   0    2.00    2.50
 -22  16   0   10.60    2.00
 -22  16   0   16.40    3.40
   6 -22   0   15.80    3.30
   6 -22   0   16.30    2.80
 -16  -6   0   11.00    3.60
  -6  22   0   13.40    3.10
  22 -16   0   17.10    4.30
 -16  -6   0   14.10    3.70
  11  12   0    1.80    2.70
  12  11   0    2.10    2.70
   3  -2  -1    6.10    0.60
  -2  -1  -1    5.20    0.60
   3  -2  -1    4.70    0.60
  -1   3  -1    4.90    0.50
  -2  -1  -1    4.40    0.70
  -2  -1  -1    4.50    0.60
  -1   3  -1    5.50    0.50
   3  -2  -1    3.80    0.60
   3  -2  -1    3.80    0.50
  -3   2   1    4.70    0.50
   1  -3   1    4.60    0.50
   1  -3   1    4.10    0.40
  -3   2   1    4.50    0.60
  -3   2   1    4.70    0.60
   2   1   1    3.70    0.50
  -3   2   1    4.80    0.50
   0  -2   1   50.09    1.90
   3  -1  -1   44.30    1.80
  -2   3  -1   41.40    1.70
  -2   3  -1   39.30    1.50
  -1  -2  -1   43.80    1.70
  -1  -2  -1   36.60    1.70
  -1  -2  -1   44.00    1.70
   1   2   1   36.70    1.70
  -3   1   1   46.30    1.80
  -3   1   1   44.20    1.70
  -3   1   1   41.90    1.80
   2  -3   1   39.30    1.50
   4  -2  -1  301.27   10.60
   4  -2  -1  316.07   10.70
  -2  -2  -1  302.57   10.60
  -2   4  -1  284.17   10.50
  -2  -2  -1  296.47   10.60
  -2   4  -1  289.17   10.60
   4  -2  -1  304.87   10.60
  -2   4  -1  319.07   10.60
  -2  -2  -1  303.37   10.70
   2  -4   1  301.87   10.50
  -4   2   1  308.67   10.70
   2  -4   1  297.97   10.40
   2   2   1  299.47   10.60
   2  -4   1  336.77   10.60
   2   2   1  303.87   10.60
   2   2   1  302.47   10.60
  -4   2   1  313.77   10.70
  -4   2   1  299.77   10.60
  -4   2   1  318.77   11.20
  -3  -2  -1  166.78    6.30
   5  -3  -1  176.78    6.50
  -2   5  -1  174.68    6.20
  -2   5  -1  169.38    6.10
   5  -3  -1  177.48    6.30
   5  -3  -1  177.48    6.30
  -2   5  -1  178.18    6.30
  -3  -2  -1  178.68    6.40
  -3  -2  -1  179.88    6.40
  -5   3   1  170.78    6.30
  -5   3   1  169.68    6.40
   3   2   1  167.58    6.30
   2  -5   1  169.58    6.10
   3   2   1  172.28    6.30
   2  -5   1  178.48    6.20
  -5   3   1  173.98    6.20
  -5   3   1  173.58    6.40
   3   2   1  170.58    6.40
   2  -5   1  175.88    6.30
  -1   4  -1   94.49    3.60
   4  -3  -1   97.29    3.80
  -3  -1  -1   97.89    3.70
  -3  -1  -1   96.69    3.80
   4  -3  -1  100.29    3.80
  -3  -1  -1   98.09    3.70
   4  -3  -1   97.49    3.60
  -1   4  -1  100.29    3.60
   4  -3  -1   92.89    3.70
  -4   3   1  101.69    3.60
  -4   3   1  103.39    3.80
  -4   3   1   96.49    3.80
   3   1   1   98.39    3.70
   1  -4   1  100.29    3.70
  -4   3   1   96.89    3.70
   3   1   1   99.29    3.70
   1  -4   1  100.09    3.60
   1  -4   1   99.99    3.60
   3   1   1   98.09    3.80
   0   3  -1    1.20    0.40
  -3   0  -1    1.20    0.50
  -3   0  -1    0.70    0.40
   3  -3  -1    0.30    0.30
   0   3  -1    0.30    0.40
  -3   0  -1    0.50    0.40
   3  -3  -1    0.90    0.40
   3   0   1    0.50    0.30
   3   0   1    0.10    0.40
   0  -3   1    0.70    0.40
   3   0   1    0.30    0.50
  -3   3   1    0.60    0.40
   1   2  -1    3.60    0.40
   2  -3  -1    3.40    0.50
  -3   1  -1    4.70    0.50
   2  -3  -1    5.50    0.50
  -3   1  -1    4.60    0.60
  -3   1  -1    4.50    0.60
   1   2  -1    3.00    0.40
  -1  -2   1    5.20    0.50
  -2   3   1    5.20    0.80
   3  -1   1    4.00    0.40
  -1  -2   1    4.50    0.50
  -2   3   1    5.40    0.50
   3  -1   1    3.80    0.50
  -1  -2   1    5.60    0.60
   3  -1   1    5.90    0.60
   1  -3  -1   43.50    1.70
  -3   2  -1   45.60    1.60
   2   1  -1   41.60    1.80
  -3   2  -1   45.40    1.70
  -3   2  -1   41.70    1.80
  -1   3   1   43.80    1.70
  -2  -1   1   41.50    1.70
  -2  -1   1   41.90    1.70
  -1   3   1   41.10    2.00
   3  -2   1   44.50    1.80
  -2  -1   1   38.70    1.70
  -1   3   1   40.60    1.70
   3   0  -1    0.10    0.40
  -3   3  -1    0.50    0.40
  -3   3  -1    0.40    0.20
   3   0  -1    0.00    0.40
  -3   3  -1    0.40    0.40
   0  -3  -1   -0.10    0.40
   3   0  -1    0.30    0.40
   0   3   1    0.80    0.40
   3  -3   1    1.00    0.40
   3  -3   1    0.40    0.20
  -3   0   1    0.40    0.40
  -3   0   1    0.30    0.40
  -3   0   1    0.40    0.40
   3  -3   1    0.20    0.40
   0   3   1    1.10    0.40
  -3   4  -1  283.07    9.90
  -3   4  -1  288.87   10.10
   4  -1  -1  294.27   10.20
  -3   4  -1  294.47   10.10
   4  -1  -1  285.17   10.10
  -1  -3  -1  287.27   10.30
   4  -1  -1  293.37   10.10
  -1  -3  -1  286.47   10.10
  -1  -3  -1  291.07   10.10
   1   3   1  291.27   10.10
   1   3   1  295.67   10.10
  -4   1   1  296.57   10.20
   3  -4   1  286.27    9.90
   3  -4   1  289.17   10.10
   3  -4   1  296.37   10.10
  -4   1   1  285.57   10.50
  -4   1   1  288.97   10.10
   1   3   1  290.57   10.10
  -3   5  -1  547.35   18.40
   5  -2  -1  530.35   18.60
  -3   5  -1  523.45   18.20
  -2  -3  -1  538.15   18.40
   5  -2  -1  539.75   18.40
  -2  -3  -1  530.15   18.40
  -3   5  -1  537.55   18.40
   5  -2  -1  543.05   18.50
  -2  -3  -1  519.75   18.50
   3  -5   1  540.55   18.40
   3  -5   1  531.55   18.20
   3  -5   1  537.35   18.40
   2   3   1  528.95   18.40
   2   3   1  554.84   18.50
  -5   2   1  553.54   18.50
  -5   2   1  528.85   18.40
   2   3   1  537.05   18.40
  -5   2   1  529.55   18.50
   6  -3  -1  216.48    7.90
  -3   6  -1  205.58    7.60
  -3   6  -1  214.78    7.80
   6  -3  -1  213.18    8.10
  -3  -3  -1  200.98    8.00
  -3   6  -1  210.48    7.80
  -3  -3  -1  209.28    7.90
  -3  -3  -1  213.88    7.90
   6  -3  -1  219.18    8.00
   3   3   1  217.08    7.90
   3   3   1  229.18    8.00
   3  -6   1  224.18    7.90
   3  -6   1  228.98    7.70
   3  -6   1  228.18    8.00
  -6   3   1  227.58    8.00
  -6   3   1  235.28    8.10
  -6   3   1  230.68    8.10
   3   3   1  222.28    8.00
  -6   3   1  226.78    7.90
  -3   7  -1  186.38    6.90
   7  -4  -1  199.38    7.40
   7  -4  -1  192.38    7.10
   7  -4  -1  196.18    7.20
  -4  -3  -1  199.48    7.30
  -3   7  -1  192.38    7.10
  -4  -3  -1  188.68    7.10
  -3   7  -1  199.78    7.10
   4   3   1  196.98    7.20
   3  -7   1  195.28    7.20
  -7   4   1  200.68    7.40
  -7   4   1  195.68    7.30
   4   3   1  194.88    7.20
   4   3   1  201.08    7.30
  -7   4   1  189.68    7.30
   3  -7   1  196.28    7.80
   3  -7   1  189.48    7.00
   6  -4  -1    8.60    1.10
   6  -4  -1    9.50    1.20
  -4  -2  -1   10.00    1.10
  -2   6  -1    9.90    1.00
  -2   6  -1   12.10    1.10
  -4  -2  -1   10.70    1.10
   6  -4  -1    9.80    0.90
  -4  -2  -1   11.90    1.20
  -2   6  -1   10.60    1.00
   2  -6   1   13.90    1.10
   2  -6   1   12.00    1.10
  -6   4   1   11.50    1.20
  -6   4   1   11.90    1.20
   4   2   1   10.40    1.10
  -6   4   1   11.40    1.30
   2  -6   1   10.90    1.00
  -6   4   1   12.40    1.00
   4   2   1   10.00    1.20
   4   2   1   12.90    1.20
  -4  -1  -1  216.08    7.70
  -4  -1  -1  215.28    7.80
   5  -4  -1  224.28    7.80
  -1   5  -1  213.18    7.50
   5  -4  -1  215.88    7.60
   5  -4  -1  220.18    7.70
  -4  -1  -1  208.18    7.60
  -1   5  -1  213.78    7.60
  -1   5  -1  219.88    7.60
   4   1   1  209.98    7.60
   1  -5   1  213.58    7.50
  -5   4   1  209.28    7.70
  -5   4   1  208.58    7.60
   1  -5   1  209.28    7.60
  -5   4   1  217.78    7.80
   4   1   1  208.68    7.70
  -5   4   1  210.98    7.50
   4   1   1  210.88    7.80
   1  -5   1  211.08    7.60
  -4   0  -1  196.98    7.00
  -4   0  -1  193.78    7.10
   0   4  -1  195.18    6.90
   0   4  -1  192.28    6.90
   0   4  -1  195.98    6.90
   4  -4  -1  190.68    6.90
  -4   0  -1  192.78    6.90
   4  -4  -1  189.88    7.00
   4  -4  -1  194.58    6.90
   0  -4   1  192.08    6.90
   0  -4   1  198.68    6.90
   0  -4   1  198.18    6.90
   4   0   1  200.18    6.90
   4   0   1  192.38    7.10
  -4   4   1  184.68    7.00
   4   0   1  199.88    7.00
  -4   4   1  194.68    6.90
  -4   4   1  196.78    6.90
  -4   1  -1  100.19    3.80
   1   3  -1  100.39    3.70
   3  -4  -1   99.19    3.70
   3  -4  -1  101.49    3.80
   1   3  -1  106.79    3.70
  -4   1  -1   96.99    3.80
   1   3  -1   97.99    3.70
  -4   1  -1   96.49    3.70
   3  -4  -1   98.39    3.70
  -3   4   1   99.79    3.70
  -3   4   1   97.79    3.70
   4  -1   1   98.09    3.90
   4  -1   1  103.29    4.30
  -3   4   1  101.89    3.80
  -1  -3   1   99.69    3.70
  -1  -3   1   97.49    3.70
   4  -1   1  100.19    3.70
  -1  -3   1  100.69    3.70
   2   2  -1  296.17   10.60
   2  -4  -1  293.77   10.50
   2   2  -1  308.07   10.60
  -4   2  -1  314.57   10.60
  -4   2  -1  295.77   10.40
  -4   2  -1  316.27   10.70
   2  -4  -1  322.07   10.60
   2   2  -1  306.17   10.60
  -2  -2   1  295.07   10.60
  -2  -2   1  300.17   10.60
   4  -2   1  306.47   10.60
  -2   4   1  294.47   10.50
  -2   4   1  301.37   10.50
   4  -2   1  319.07   10.70
   4  -2   1  297.47   10.50
  -2   4   1  315.97   10.60
  -2  -2   1  301.07   10.60
  -4   3  -1  304.77   10.20
  -4   3  -1  292.27   10.00
  -4   3  -1  298.07   10.10
   3   1  -1  293.17   10.20
   3   1  -1  287.27   10.10
   1  -4  -1  292.37   10.10
   3   1  -1  288.07   10.10
  -4   3  -1  289.87    9.90
   1  -4  -1  303.37   10.10
  -3  -1   1  287.87   10.20
  -1   4   1  280.97   10.00
   4  -3   1  296.57   10.20
  -3  -1   1  288.67   10.10
   4  -3   1  284.87   10.10
  -3  -1   1  280.47   10.10
   4  -3   1  284.57   10.00
  -1   4   1  285.47   10.10
   4   0  -1  236.38    8.30
  -4   4  -1  233.48    8.20
   0  -4  -1  237.48    8.20
  -4   4  -1  238.68    8.00
   0  -4  -1  234.38    8.30
  -4   4  -1  228.18    8.30
   4   0  -1  234.28    8.30
  -4   4  -1  237.38    8.00
   0  -4  -1  242.48    8.20
   4   0  -1  227.58    8.30
   0   4   1  233.18    8.20
   4  -4   1  222.98    8.30
   4  -4   1  239.28    8.00
  -4   0   1  217.48    8.60
   0   4   1  228.68    8.20
  -4   0   1  237.28    8.30
   0   4   1  232.18    8.20
  -4   0   1  227.58    8.20
   4  -4   1  230.18    8.20
  -4   5  -1  546.75   18.80
  -1  -4  -1  550.14   18.90
   5  -1  -1  537.85   18.90
  -1  -4  -1  538.45   18.80
  -1  -4  -1  536.65   18.90
  -4   5  -1  527.95   18.60
   5  -1  -1  564.04   19.00
   5  -1  -1  547.55   18.90
  -4   5  -1  562.94   18.90
   1   4   1  552.44   18.90
   1   4   1  550.04   18.90
   4  -5   1  544.15   18.80
  -5   1   1  557.24   18.90
   1   4   1  535.25   18.80
  -5   1   1  556.74   19.00
  -5   1   1  559.74   19.40
   4  -5   1  562.74   18.90
   4  -5   1  543.65   18.60
  -4   6  -1  173.68    6.50
  -4   6  -1  175.08    6.50
  -2  -4  -1  168.78    6.60
   6  -2  -1  176.28    6.70
  -4   6  -1  168.88    6.20
  -2  -4  -1  169.38    6.50
   6  -2  -1  175.08    6.60
   6  -2  -1  173.48    6.50
  -2  -4  -1  170.38    6.50
   2   4   1  184.38    6.60
  -6   2   1  181.78    6.50
   2   4   1  189.28    6.60
   4  -6   1  179.48    6.60
   4  -6   1  193.48    6.70
   4  -6   1  182.38    6.30
  -6   2   1  190.88    6.70
   2   4   1  177.18    6.50
  -6   2   1  187.78    6.70
  -3  -4  -1  156.58    6.00
   7  -3  -1  158.38    6.20
  -3  -4  -1  161.48    6.30
   7  -3  -1  161.08    6.00
  -4   7  -1  151.48    5.60
  -4   7  -1  158.18    5.90
  -3  -4  -1  153.58    6.00
  -4   7  -1  157.58    5.90
   7  -3  -1  153.68    5.90
   3   4   1  161.88    6.00
  -7   3   1  150.98    6.10
  -7   3   1  159.28    6.10
   3   4   1  158.68    5.90
  -7   3   1  161.48    6.20
   4  -7   1  156.28    5.70
   4  -7   1  163.18    6.00
   4  -7   1  163.98    6.60
   3   4   1  161.48    6.00
  -4  -4  -1   42.80    2.50
  -4  -4  -1   45.60    3.40
  -4   8  -1   47.10    2.40
  -4  -4  -1   47.70    2.50
   8  -4  -1   46.60    2.90
   8  -4  -1   55.29    2.60
  -4   8  -1   45.40    2.10
   8  -4  -1   45.70    2.40
  -8   4   1   48.00    3.10
   4  -8   1   49.99    2.40
   4   4   1   50.59    2.50
  -8   4   1   49.90    2.40
   4  -8   1   53.89    2.60
  -8   4   1   47.50    2.60
   4   4   1   49.90    2.50
   4   4   1   47.80    2.70
  -8   4   1   49.90    2.70
   4  -8   1   50.09    2.30
   9  -5  -1    9.20    1.30
  -4   9  -1    9.50    1.30
  -5  -4  -1   10.40    1.50
   9  -5  -1   10.00    1.30
  -5  -4  -1    7.40    1.40
  -4   9  -1   11.30    1.20
  -5  -4  -1    7.10    1.30
   9  -5  -1   10.30    1.80
   5   4   1    6.70    1.20
   4  -9   1    9.00    1.10
  -9   5   1   11.60    1.60
   4  -9   1    8.70    1.20
   4  -9   1    9.00    1.30
  -9   5   1    5.30    1.40
   5   4   1    7.10    1.30
  -9   5   1    8.00    1.60
  -9   5   1   10.30    1.20
   8  -5  -1  124.69    5.10
  -3   8  -1  123.79    4.80
   8  -5  -1  123.89    5.00
  -5  -3  -1  117.49    5.10
  -5  -3  -1  119.29    5.20
  -3   8  -1  124.59    5.00
   3  -8   1  134.49    5.10
  -8   5   1  129.79    5.30
  -8   5   1  138.89    6.40
  -8   5   1  132.19    5.30
   5   3   1  136.19    5.20
   3  -8   1  133.29    5.20
   3  -8   1  138.69    5.10
  -8   5   1  130.39    5.00
   5   3   1  131.59    5.10
   5   3   1  133.39    5.30
  -5  -2  -1   72.79    3.50
  -2   7  -1   73.39    3.20
  -2   7  -1   83.79    3.40
   7  -5  -1   92.29    3.90
  -5  -2  -1   88.69    3.80
  -5  -2  -1   78.89    4.20
   7  -5  -1   80.69    3.50
   7  -5  -1   78.49    3.40
  -2   7  -1   90.69    3.50
   2  -7   1   86.99    4.30
   5   2   1   76.89    3.50
   2  -7   1   80.79    3.70
  -7   5   1   84.59    3.50
   2  -7   1   82.59    3.40
  -7   5   1   85.19    3.30
   5   2   1   81.99    3.60
   5   2   1   86.09    3.70
  -7   5   1   83.99    3.60
  -7   5   1   88.99    3.70
  -1   6  -1  334.07   11.40
  -1   6  -1  327.27   11.30
  -5  -1  -1  320.17   11.40
   6  -5  -1  325.97   11.40
  -5  -1  -1  331.37   11.50
   6  -5  -1  321.47   11.60
  -5  -1  -1  310.47   11.60
   6  -5  -1  325.47   11.50
  -1   6  -1  330.07   11.40
   1  -6   1  331.67   11.90
   5   1   1  320.47   11.60
   1  -6   1  322.57   11.40
   5   1   1  330.17   11.50
  -6   5   1  316.47   11.50
  -6   5   1  319.97   11.40
  -6   5   1  324.57   11.30
  -6   5   1  315.27   11.50
   5   1   1  319.67   11.40
   1  -6   1  328.37   12.00
  -5   0  -1   13.80    1.40
  -5   0  -1   10.50    1.20
   0   5  -1   12.30    1.00
   0   5  -1   10.40    1.10
   5  -5  -1   11.80    1.10
  -5   0  -1   10.10    1.30
   5  -5  -1   11.20    1.10
   5   0   1   12.10    1.20
   5   0   1   10.70    1.20
   0  -5   1   13.50    1.10
  -5   5   1   11.40    1.10
   5   0   1    8.80    1.00
  -5   5   1   11.50    1.00
   0  -5   1    9.40    1.50
  -5   5   1   10.50    1.00
   0  -5   1   11.10    1.30
  -5   5   1   11.80    1.20
   1   4  -1  211.48    7.60
  -5   1  -1  206.48    7.80
   4  -5  -1  205.98    7.60
   1   4  -1  216.28    7.70
   4  -5  -1  225.08    7.80
  -5   1  -1  216.48    7.80
   4  -5  -1  210.18    7.60
  -5   1  -1  207.88    7.60
   1   4  -1  208.88    7.60
  -1  -4   1  217.98    7.70
  -1  -4   1  217.38    7.70
  -4   5   1  223.98    7.70
   5  -1   1  218.78    7.60
  -1  -4   1  208.28    7.80
   5  -1   1  221.88    7.80
   5  -1   1  219.68    7.90
  -4   5   1  216.38    7.60
  -4   5   1  217.68    7.70
   2   3  -1  184.78    6.40
  -5   2  -1  169.28    6.20
   3  -5  -1  172.68    6.30
   2   3  -1  172.18    6.30
   3  -5  -1  170.18    6.30
  -5   2  -1  170.58    6.50
  -5   2  -1  173.78    6.40
   2   3  -1  169.58    6.30
   3  -5  -1  181.48    6.40
  -2  -3   1  177.68    6.30
  -3   5   1  173.08    6.20
  -3   5   1  183.88    6.40
  -3   5   1  180.68    6.30
   5  -2   1  178.38    6.40
  -2  -3   1  171.58    6.60
   5  -2   1  179.38    6.50
  -2  -3   1  170.98    6.40
   5  -2   1  174.28    6.20
  -5   3  -1  518.65   18.20
  -5   3  -1  543.35   18.50
  -5   3  -1  533.15   18.50
   3   2  -1  534.95   18.40
   3   2  -1  543.45   18.40
   3   2  -1  530.25   18.50
   2  -5  -1  531.35   18.40
   2  -5  -1  538.95   18.40
   2  -5  -1  542.25   18.40
   5  -3   1  547.85   18.60
   5  -3   1  544.75   18.70
  -3  -2   1  531.75   18.40
  -2   5   1  524.35   18.30
  -2   5   1  542.25   18.40
  -3  -2   1  538.05   18.40
   5  -3   1  538.95   18.30
  -2   5   1  531.75   18.40
  -3  -2   1  532.25   18.50
  -5   4  -1  549.05   18.80
  -5   4  -1  560.24   19.10
   1  -5  -1  550.44   19.00
   1  -5  -1  557.74   19.00
   4   1  -1  557.64   19.10
   1  -5  -1  572.44   19.00
   4   1  -1  544.85   19.00
   4   1  -1  567.74   19.00
  -5   4  -1  556.44   19.00
  -5   4  -1  573.24   19.00
  -1   5   1  536.45   18.90
  -4  -1   1  546.95   19.00
   5  -4   1  570.24   19.10
  -1   5   1  548.25   19.00
   5  -4   1  554.34   18.90
  -4  -1   1  513.85   19.20
  -1   5   1  542.65   19.00
   0  -5  -1  961.30   32.80
   0  -5  -1  942.31   32.80
   0  -5  -1  973.40   32.80
  -5   5  -1  967.10   32.50
   5   0  -1  968.40   32.80
   5   0  -1  949.21   32.90
  -5   5  -1  967.80   32.80
  -5   5  -1  956.20   32.90
   5   0  -1  974.30   32.80
   0   5   1  944.91   32.70
   0   5   1  941.21   32.80
   0   5   1  970.70   32.80
   5  -5   1  954.70   33.00
  -5   0   1  985.90   33.40
  -5   0   1  987.10   32.80
   5  -5   1  988.70   32.60
  -5   0   1  944.91   32.90
  -5   6  -1   41.30    2.10
  -5   6  -1   44.10    2.10
  -1  -5  -1   42.40    2.20
   6  -1  -1   45.30    2.20
  -1  -5  -1   43.50    2.40
  -1  -5  -1   41.40    2.10
   6  -1  -1   44.10    2.20
  -5   6  -1   42.70    1.90
   6  -1  -1   43.70    2.30
   1   5   1   41.50    2.20
   1   5   1   42.20    2.00
  -6   1   1   43.30    2.20
   5  -6   1   42.60    2.30
   1   5   1   43.50    2.10
  -6   1   1   41.90    2.20
   5  -6   1   40.70    1.80
   5  -6   1   45.00    2.30
  -6   1   1   44.70    2.40
   7  -2  -1  142.19    5.40
  -2  -5  -1  125.99    5.00
  -2  -5  -1  125.39    5.10
  -5   7  -1  131.49    5.00
   7  -2  -1  127.69    5.10
  -5   7  -1  123.99    4.60
  -2  -5  -1  124.19    5.00
  -5   7  -1  127.19    5.00
   7  -2  -1  125.09    5.00
   2   5   1  131.59    5.10
   2   5   1  126.19    5.00
  -7   2   1  130.79    5.30
  -7   2   1  142.49    6.00
   5  -7   1  126.49    4.70
   2   5   1  131.29    5.00
  -7   2   1  129.19    4.90
   5  -7   1  134.09    5.10
   5  -7   1  126.69    4.90
  -5   8  -1   93.09    4.10
  -5   8  -1  102.79    3.80
  -5   8  -1  107.19    4.20
  -3  -5  -1  104.89    4.50
   8  -3  -1  105.89    4.60
  -3  -5  -1  100.29    4.30
   8  -3  -1  102.99    4.30
  -3  -5  -1  103.29    4.30
   8  -3  -1  104.49    4.20
   5  -8   1  100.89    4.20
  -8   3   1  109.59    4.50
   3   5   1  101.69    4.20
  -8   3   1  103.19    4.20
   5  -8   1  109.59    4.40
  -8   3   1  108.59    4.60
   3   5   1  102.79    4.30
   3   5   1  105.49    4.40
   5  -8   1  102.49    4.00
  -5   9  -1   61.69    2.50
  -5   9  -1   54.39    2.90
   9  -4  -1   58.99    3.20
   9  -4  -1   60.19    2.90
  -4  -5  -1   54.69    3.10
   9  -4  -1   53.39    2.90
  -4  -5  -1   57.09    3.00
  -4  -5  -1   57.39    2.90
   4   5   1   59.89    3.10
  -9   4   1   59.09    3.50
  -9   4   1   62.29    3.20
   5  -9   1   58.49    3.00
   5  -9   1   58.19    2.60
   5  -9   1   58.19    2.80
  -9   4   1   55.49    3.10
   4   5   1   57.89    2.90
  -9   4   1   59.89    2.80
   4   5   1   61.59    2.90
  -5  -5  -1   -0.90    1.20
  -5  10  -1    1.40    0.70
  10  -5  -1   -1.60    1.20
  10  -5  -1   -0.50    1.00
  10  -5  -1   -1.00    1.40
 -10   5   1   -2.60    1.10
   5 -10   1   -2.70    1.20
 -10   5   1    0.80    1.00
   5   5   1   -2.30    1.50
   5 -10   1    1.10    0.90
 -10   5   1    1.10    1.10
  11  -6  -1   79.19    4.20
  -5  11  -1   89.29    3.50
  -6  -5  -1   83.29    4.20
  11  -6  -1   83.39    4.40
  -6  -5  -1   83.79    4.40
  -6  -5  -1   80.59    4.20
  -5  11  -1   81.19    4.00
  11  -6  -1   85.09    4.00
  -5  11  -1   84.69    4.00
 -11   6   1   85.19    4.40
   5 -11   1   84.99    4.10
   5 -11   1   83.69    4.00
   5 -11   1   85.29    3.80
 -11   6   1   80.09    3.70
 -11   6   1   80.59    4.60
   6   5   1   85.49    4.40
   6   5   1   83.79    4.20
 -11   6   1   81.39    4.40
  -4  10  -1   71.49    3.40
  -4  10  -1   74.19    3.50
  10  -6  -1   74.79    3.60
  10  -6  -1   74.99    3.30
  10  -6  -1   77.99    4.10
  -4  10  -1   77.19    3.10
  -6  -4  -1   63.69    3.50
  -6  -4  -1   71.49    3.70
  -6  -4  -1   71.29    3.60
   4 -10   1   63.29    3.40
   4 -10   1   68.59    3.40
 -10   6   1   70.19    3.60
 -10   6   1   69.09    3.70
   6   4   1   69.39    5.00
 -10   6   1   67.09    3.20
   4 -10   1   73.49    3.30
 -10   6   1   68.09    3.50
   6   4   1   66.79    3.50
   9  -6  -1  305.37   11.10
   9  -6  -1  304.97   11.20
   9  -6  -1  313.87   11.70
  -6  -3  -1  293.17   11.20
  -6  -3  -1  309.77   11.30
  -3   9  -1  302.37   11.10
  -6  -3  -1  311.57   11.50
  -3   9  -1  301.97   10.90
   6   3   1  302.37   11.20
   6   3   1  318.47   11.30
   3  -9   1  316.77   11.10
  -9   6   1  319.37   12.00
  -9   6   1  312.37   11.30
  -9   6   1  314.77   11.40
   3  -9   1  304.27   11.20
   3  -9   1  314.47   11.20
  -9   6   1  310.57   11.40
   6   3   1  325.37   11.60
   8  -6  -1   85.19    3.60
  -2   8  -1   81.89    3.30
  -2   8  -1   68.79    3.30
   8  -6  -1   82.29    4.00
  -2   8  -1   78.59    3.40
  -6  -2  -1   80.89    3.80
   6   2   1   80.69    3.60
  -8   6   1   75.99    3.50
   2  -8   1   83.69    3.50
  -8   6   1   80.79    3.70
   6   2   1   81.59    3.80
   6   2   1   73.39    3.50
   2  -8   1   86.49    3.60
  -8   6   1   79.09    3.70
   2  -8   1   78.49    3.40
  -6  -1  -1   26.00    1.90
   7  -6  -1   28.50    1.70
   7  -6  -1   28.80    2.30
  -1   7  -1   29.20    1.70
  -1   7  -1   29.30    1.70
  -6  -1  -1   26.60    1.70
   7  -6  -1   30.90    1.80
  -1   7  -1   27.30    1.60
  -7   6   1   22.60    1.70
   1  -7   1   25.20    1.60
   1  -7   1   23.00    2.30
  -7   6   1   24.00    1.70
   1  -7   1   23.10    1.60
  -7   6   1   25.60    1.60
   6   1   1   23.50    1.90
   6   1   1   24.80    1.70
  -7   6   1   25.50    1.50
   6   1   1   24.80    1.80
   6  -6  -1    0.00    0.70
   0   6  -1    0.00    0.60
   0   6  -1   -0.30    0.60
  -6   0  -1   -1.30    0.90
   0   6  -1    1.20    0.80
   6  -6  -1    1.40    0.90
  -6   0  -1   -0.80    0.80
   6  -6  -1    0.40    0.60
  -6   0  -1   -1.10    0.70
   0  -6   1   -0.10    0.90
  -6   6   1    0.20    0.80
   6   0   1   -0.30    0.90
  -6   6   1    0.20    0.50
   6   0   1   -2.00    0.80
  -6   6   1   -0.40    0.50
  -6   6   1    1.30    0.80
   6   0   1   -0.50    0.70
   0  -6   1    0.40    0.70
  -6   1  -1  319.57   11.60
   1   5  -1  322.77   11.40
   5  -6  -1  321.67   11.40
   1   5  -1  316.97   11.30
   1   5  -1  321.97   11.40
  -6   1  -1  322.77   11.50
   5  -6  -1  312.27   11.30
   5  -6  -1  314.67   11.50
  -1  -5   1  317.67   11.50
  -1  -5   1  330.57   11.70
  -5   6   1  326.07   11.30
  -1  -5   1  325.27   11.30
   6  -1   1  332.47   11.70
   6  -1   1  327.17   11.40
  -5   6   1  328.67   11.50
   6  -1   1  332.77   11.50
  -5   6   1  324.67   11.40
   2   4  -1   10.10    1.10
   2   4  -1   12.50    1.10
  -6   2  -1   11.30    1.20
   4  -6  -1   12.20    1.00
  -6   2  -1   12.90    1.30
   4  -6  -1   12.50    1.20
  -6   2  -1   10.90    1.20
   2   4  -1   13.10    1.20
   4  -6  -1   12.30    1.00
  -4   6   1    9.10    0.90
  -2  -4   1    9.90    1.20
  -2  -4   1   11.30    1.20
   6  -2   1   10.50    1.30
   6  -2   1   10.80    1.10
  -4   6   1   10.00    1.10
   6  -2   1    9.80    1.10
  -2  -4   1   10.00    1.20
  -4   6   1   11.30    1.10
   3   3  -1  223.38    7.90
   3  -6  -1  225.18    7.90
   3  -6  -1  226.18    7.80
   3   3  -1  222.58    7.90
  -6   3  -1  217.38    7.70
   3  -6  -1  218.98    7.90
  -6   3  -1  222.68    7.90
   3   3  -1  220.68    7.90
  -6   3  -1  230.68    8.10
   6  -3   1  214.08    7.70
  -3   6   1  212.38    7.80
  -3  -3   1  215.78    8.10
   6  -3   1  223.08    8.10
   6  -3   1  214.68    7.90
  -3   6   1  211.38    7.70
  -3   6   1  215.98    7.80
  -3  -3   1  205.78    7.80
  -3  -3   1  216.18    8.70
   2  -6  -1  187.08    6.60
   2  -6  -1  187.58    6.60
  -6   4  -1  179.88    6.40
   4   2  -1  192.68    6.70
   2  -6  -1  188.28    6.60
  -6   4  -1  187.58    6.80
   4   2  -1  189.38    6.70
  -6   4  -1  189.68    6.60
  -6   4  -1  184.98    6.70
   4   2  -1  181.18    6.70
   6  -4   1  181.38    6.80
   6  -4   1  174.98    6.60
  -2   6   1  172.68    6.60
  -4  -2   1  170.88    6.80
  -4  -2   1  168.08    6.60
  -4  -2   1  175.28    7.20
   6  -4   1  172.28    6.40
  -2   6   1  169.88    6.40
  -2   6   1  173.88    6.60
  -6   5  -1   43.60    1.80
   5   1  -1   39.80    2.10
   1  -6  -1   43.30    2.10
  -6   5  -1   41.80    1.90
  -6   5  -1   42.70    2.20
  -6   5  -1   44.00    2.20
   1  -6  -1   41.00    2.00
   5   1  -1   43.10    2.30
   5   1  -1   41.10    2.10
  -1   6   1   40.30    1.90
  -5  -1   1   42.50    2.40
   6  -5   1   45.20    2.70
  -1   6   1   40.50    2.00
  -5  -1   1   36.40    2.10
   6  -5   1   42.30    2.10
  -5  -1   1   43.40    2.30
  -1   6   1   42.60    2.00
  -6   6  -1    8.50    0.80
   0  -6  -1    8.70    1.00
  -6   6  -1    8.30    1.00
   0  -6  -1    9.90    1.20
   0  -6  -1    6.40    1.00
   6   0  -1    7.30    1.00
  -6   6  -1    8.50    0.80
  -6   6  -1    8.60    1.10
   6   0  -1    8.30    1.10
   0   6   1    9.30    1.10
   6  -6   1    6.50    0.90
   6  -6   1    7.30    1.20
   0   6   1    5.50    0.90
  -6   0   1    7.00    1.10
   6  -6   1    6.70    0.80
  -1  -6  -1   29.70    2.80
  -1  -6  -1   28.90    1.80
  -6   7  -1   28.50    1.80
  -6   7  -1   25.70    1.40
   7  -1  -1   29.00    2.00
   7  -1  -1   28.00    1.80
  -1  -6  -1   25.00    1.80
  -6   7  -1   24.90    1.70
   1   6   1   32.20    1.80
   6  -7   1   28.40    1.50
   6  -7   1   28.70    1.70
   6  -7   1   30.20    1.90
   1   6   1   31.90    1.80
   1   6   1   27.20    1.70
  -7   1   1   30.80    2.00
  -7   1   1   26.20    1.90
  -7   1   1   27.30    1.90
  -2  -6  -1  246.18    9.10
   8  -2  -1  243.18    9.00
   8  -2  -1  252.47    9.10
  -6   8  -1  254.87    9.00
  -2  -6  -1  255.27    9.00
   8  -2  -1  259.17    9.40
  -2  -6  -1  243.98    9.00
  -6   8  -1  241.28    8.50
  -6   8  -1  243.78    9.00
   6  -8   1  242.88    8.90
   2   6   1  240.88    9.00
   6  -8   1  231.48    8.60
  -8   2   1  245.08   10.10
  -8   2   1  239.28    8.90
  -8   2   1  244.08    9.20
   6  -8   1  239.58    9.10
   2   6   1  246.18    9.00
   2   6   1  236.38    8.90
  -6   9  -1   81.99    3.20
   9  -3  -1   82.89    4.70
   9  -3  -1   85.39    3.80
  -3  -6  -1   78.99    3.90
  -6   9  -1   88.99    3.80
  -3  -6  -1   83.59    3.80
  -3  -6  -1   79.49    3.80
   9  -3  -1   82.59    4.10
   3   6   1   79.49    3.70
   6  -9   1   82.69    3.60
  -9   3   1   85.29    3.70
   3   6   1   85.89    3.80
  -9   3   1   80.09    4.10
   3   6   1   82.09    3.80
   6  -9   1   87.19    3.90
   6  -9   1   84.39    3.40
  -9   3   1   80.89    3.90
  -4  -6  -1  108.59    4.60
  -6  10  -1   98.59    4.40
  -6  10  -1   95.39    3.80
  10  -4  -1   97.49    5.40
  10  -4  -1  105.09    4.80
  10  -4  -1   92.89    4.40
  -6  10  -1  101.59    4.40
  -4  -6  -1   95.59    4.50
  -4  -6  -1   92.59    4.50
   4   6   1   97.49    4.50
 -10   4   1   96.59    4.60
 -10   4   1  104.39    4.30
   6 -10   1   94.89    4.30
   6 -10   1   96.09    4.10
   6 -10   1  104.79    4.60
   4   6   1   95.89    5.00
 -10   4   1   93.09    4.70
  -6  11  -1    7.80    1.50
  11  -5  -1    6.80    1.50
  -6  11  -1    9.70    1.60
  -5  -6  -1    4.40    1.50
  11  -5  -1    6.60    2.00
  -5  -6  -1    5.50    1.50
  11  -5  -1    7.50    1.40
  -6  11  -1    9.00    1.00
   5   6   1    6.70    1.70
 -11   5   1    6.80    1.80
   6 -11   1   10.60    1.70
 -11   5   1    8.40    1.40
   5   6   1    6.70    1.50
 -11   5   1    9.70    1.70
   6 -11   1    7.40    1.50
 -11   5   1    6.90    1.60
  -6  -6  -1   99.89    5.20
  -6  -6  -1  121.39    6.80
  -6  12  -1  104.69    4.90
  -6  12  -1  101.89    4.30
  12  -6  -1  110.09    5.40
  12  -6  -1  103.89    4.80
  12  -6  -1  108.69    5.60
  -6  -6  -1  105.29    5.00
 -12   6   1  115.09    5.20
   6 -12   1  100.19    4.90
   6 -12   1  106.09    4.60
   6 -12   1  110.19    5.10
 -12   6   1  108.39    6.90
 -12   6   1  111.99    4.70
 -12   6   1  107.19    5.10
   6   6   1  110.19    5.00
  -6  13  -1   30.30    2.50
  -7  -6  -1   35.80    3.00
  13  -7  -1   31.90    2.60
  -6  13  -1   38.20    2.90
  13  -7  -1   39.00    3.20
  -7  -6  -1   32.80    2.80
  -7  -6  -1   29.10    2.90
  13  -7  -1   31.40    2.50
   6 -13   1   41.60    3.00
 -13   7   1   41.50    3.20
 -13   7   1   38.30    2.50
   6 -13   1   34.50    2.50
   6 -13   1   38.70    2.60
   7   6   1   39.40    3.00
 -13   7   1   32.10    2.90
 -13   7   1   39.60    3.30
  12  -7  -1   66.49    4.30
  -7  -5  -1   65.79    3.90
  -5  12  -1   63.69    3.10
  12  -7  -1   63.39    3.70
  -7  -5  -1   72.99    4.50
  -5  12  -1   67.59    3.70
  -7  -5  -1   63.49    4.10
  12  -7  -1   65.29    3.60
 -12   7   1   65.59    4.40
   7   5   1   72.39    3.90
 -12   7   1   67.69    3.30
 -12   7   1   64.09    3.70
 -12   7   1   69.99    3.90
   7   5   1   63.59    4.10
   5 -12   1   69.29    3.40
   5 -12   1   63.39    3.50
   5 -12   1   75.09    3.90
  11  -7  -1   49.30    2.70
  -4  11  -1   50.99    2.60
  -7  -4  -1   49.99    3.10
  -7  -4  -1   48.70    3.20
  -7  -4  -1   48.30    3.10
  -4  11  -1   48.00    2.80
  11  -7  -1   47.10    2.90
  11  -7  -1   55.29    3.40
 -11   7   1   47.40    2.60
   7   4   1   48.30    4.50
   7   4   1   44.50    2.90
   4 -11   1   48.00    2.90
   4 -11   1   47.40    2.80
 -11   7   1   44.70    2.90
   4 -11   1   52.19    3.00
 -11   7   1   52.89    3.30
 -11   7   1   49.60    3.10
  -3  10  -1   53.69    3.00
  10  -7  -1   57.59    3.40
  -3  10  -1   55.89    2.70
  -7  -3  -1   51.79    3.30
  -7  -3  -1   52.39    3.20
  10  -7  -1   45.90    2.80
  10  -7  -1   54.89    3.10
  -3  10  -1   52.29    2.80
   3 -10   1   55.09    2.80
 -10   7   1   53.59    3.10
   7   3   1   54.89    3.20
   3 -10   1   61.99    3.10
 -10   7   1   50.49    2.70
   7   3   1   53.19    3.10
 -10   7   1   56.29    3.40
 -10   7   1   46.10    2.90
   3 -10   1   52.89    3.00
  -7  -2  -1  164.08    6.60
  -7  -2  -1  154.58    6.30
  -2   9  -1  160.48    6.30
   9  -7  -1  170.68    6.70
  -2   9  -1  157.08    6.10
   9  -7  -1  163.78    6.30
  -2   9  -1  162.28    6.20
  -7  -2  -1  174.58    6.60
   7   2   1  157.68    6.30
   2  -9   1  157.78    6.30
  -9   7   1  155.18    6.30
   2  -9   1  170.28    6.30
  -9   7   1  154.88    6.10
   7   2   1  164.28    6.40
   2  -9   1  161.78    6.20
  -9   7   1  159.18    6.50
  -9   7   1  158.68    6.40
   7   2   1  163.48    7.10
  -7  -1  -1  369.26   13.80
  -7  -1  -1  337.97   12.90
  -1   8  -1  350.26   12.50
   8  -7  -1  342.67   12.60
   8  -7  -1  352.46   12.70
  -7  -1  -1  354.76   12.70
  -1   8  -1  345.17   12.70
   8  -7  -1  352.76   13.00
   1  -8   1  369.46   12.60
  -8   7   1  352.36   12.60
  -8   7   1  361.36   12.80
   7   1   1  363.36   12.80
  -8   7   1  357.46   12.50
   1  -8   1  360.26   12.70
  -8   7   1  348.77   12.80
   7   1   1  354.66   12.70
   1  -8   1  362.66   12.70
   7  -7  -1    3.30    0.90
   0   7  -1    2.20    0.80
   0   7  -1    4.20    1.00
  -7   0  -1    1.90    0.90
  -7   0  -1    2.90    1.20
  -7   0  -1    2.70    1.20
   7  -7  -1    5.90    2.10
   0   7  -1    4.70    0.90
   7  -7  -1    2.70    0.90
   0  -7   1    3.50    1.00
   7   0   1    2.50    1.10
   7   0   1    1.30    1.00
  -7   7   1    3.40    0.70
  -7   7   1    3.60    0.80
   0  -7   1    3.40    1.00
   7   0   1    1.90    1.20
  -7   7   1    3.10    0.90
  -7   7   1    4.80    1.10
  -7   1  -1   23.20    1.60
   6  -7  -1   24.90    1.60
   6  -7  -1   25.40    1.80
  -7   1  -1   20.50    1.70
  -7   1  -1   23.50    1.90
   1   6  -1   21.40    1.60
   1   6  -1   25.70    1.60
   1   6  -1   24.60    1.60
   6  -7  -1   24.70    1.60
  -6   7   1   28.60    1.70
   7  -1   1   31.80    2.10
  -1  -6   1   28.70    1.80
  -6   7   1   27.70    1.70
  -1  -6   1   28.90    1.80
   7  -1   1   27.10    1.80
  -6   7   1   28.40    1.50
   7  -1   1   25.70    1.80
  -1  -6   1   24.80    1.80
   2   5  -1   78.29    3.50
   5  -7  -1   82.39    3.40
   5  -7  -1   92.09    3.60
  -7   2  -1   88.09    3.60
  -7   2  -1   78.99    3.40
  -7   2  -1   96.19    3.90
   5  -7  -1   89.59    3.50
   2   5  -1   84.79    3.50
  -5   7   1   82.89    3.50
   7  -2   1   79.09    3.50
  -2  -5   1   73.49    3.50
   7  -2   1   81.89    4.20
  -5   7   1   78.99    3.30
   7  -2   1   79.69    3.40
  -5   7   1   83.09    3.50
  -2  -5   1   82.09    3.90
  -2  -5   1   79.49    3.40
   3   4  -1  190.38    7.10
   4  -7  -1  194.78    7.10
  -7   3  -1  184.38    7.20
   4  -7  -1  199.68    7.30
  -7   3  -1  198.38    7.30
   3   4  -1  193.08    7.20
   4  -7  -1  189.28    7.10
   3   4  -1  199.98    7.20
  -7   3  -1  188.08    7.30
   7  -3   1  196.78    7.20
   7  -3   1  195.88    7.00
  -4   7   1  198.38    7.10
  -4   7   1  198.18    7.10
  -3  -4   1  196.88    7.20
  -3  -4   1  192.78    7.30
   7  -3   1  192.88    8.50
  -3  -4   1  186.98    7.10
  -4   7   1  192.78    6.90
   3  -7  -1  163.98    5.90
   3  -7  -1  156.68    6.00
   4   3  -1  159.08    6.00
  -7   4  -1  155.18    5.70
   4   3  -1  155.98    6.00
  -7   4  -1  157.08    6.00
  -7   4  -1  152.18    6.10
   3  -7  -1  155.38    6.10
   4   3  -1  169.88    6.10
  -4  -3   1  164.58    6.70
  -4  -3   1  154.98    6.10
  -3   7   1  151.38    5.70
   7  -4   1  164.88    6.30
   7  -4   1  155.38    5.80
   7  -4   1  155.78    6.00
  -4  -3   1  151.98    5.90
  -3   7   1  157.58    5.90
  -3   7   1  159.58    5.90
   2  -7  -1  128.69    5.00
  -7   5  -1  130.59    4.90
  -7   5  -1  126.19    5.10
   5   2  -1  130.89    5.00
   2  -7  -1  125.99    5.00
   5   2  -1  133.19    5.20
   5   2  -1  126.49    5.00
  -7   5  -1  130.89    4.70
  -7   5  -1  125.89    5.10
   2  -7  -1  129.99    5.10
  -2   7   1  130.99    4.90
   7  -5   1  124.99    5.30
  -5  -2   1  128.29    5.10
   7  -5   1  129.39    4.80
   7  -5   1  126.29    5.00
  -2   7   1  126.89    4.90
  -5  -2   1  133.39    5.90
  -2   7   1  124.79    4.80
  -5  -2   1  119.59    5.00
   1  -7  -1   26.70    1.90
  -7   6  -1   30.60    1.90
   1  -7  -1   33.80    1.80
   6   1  -1   28.80    1.90
   6   1  -1   32.20    2.10
  -7   6  -1   29.90    1.90
   6   1  -1   23.30    2.10
  -7   6  -1   30.80    1.50
  -7   6  -1   29.20    1.50
  -6  -1   1   27.30    2.20
  -6  -1   1   27.10    1.90
  -1   7   1   29.00    1.70
  -1   7   1   27.30    1.70
   7  -6   1   25.10    1.90
  -1   7   1   26.40    1.70
   7  -6   1   26.10    1.80
  -7   7  -1    1.00    0.50
   7   0  -1   -1.20    1.00
   0  -7  -1    1.30    0.90
   0  -7  -1   -1.20    0.80
  -7   7  -1   -0.60    0.90
  -7   7  -1    0.10    0.80
  -7   7  -1    0.00    0.50
   7   0  -1   -0.70    1.10
   7   0  -1   -1.80    1.60
   0   7   1   -0.70    0.80
   7  -7   1    1.20    0.60
  -7   0   1   -0.50    0.90
  -7   0   1   -1.00    1.10
   7  -7   1    1.20    0.80
  -7   0   1   -0.60    0.90
   0   7   1   -1.40    0.80
   7  -7   1   -0.30    0.90
  -7   8  -1  351.36   12.40
  -1  -7  -1  345.27   12.30
   8  -1  -1  354.16   12.40
  -1  -7  -1  342.37   12.40
   8  -1  -1  361.06   12.50
  -7   8  -1  346.07   11.90
  -7   8  -1  353.96   11.90
  -7   8  -1  346.87   12.30
   8  -1  -1  361.26   12.60
  -1  -7  -1  353.86   12.30
   7  -8   1  335.47   12.00
   1   7   1  340.07   12.40
   7  -8   1  330.17   12.20
   7  -8   1  344.57   12.50
  -8   1   1  339.77   12.50
   1   7   1  337.17   12.30
  -8   1   1  326.17   12.20
   1   7   1  328.47   12.20
  -8   1   1  327.77   12.50
  -2  -7  -1   38.20    2.40
  -7   9  -1   34.30    1.70
  -2  -7  -1   39.80    2.50
  -2  -7  -1   36.30    2.30
   9  -2  -1   33.80    2.40
  -7   9  -1   37.70    2.30
   9  -2  -1   39.50    2.40
   2   7   1   36.20    2.40
   2   7   1   35.70    2.40
   7  -9   1   33.40    2.20
   7  -9   1   36.90    2.50
  -9   2   1   35.70    2.60
   7  -9   1   32.90    1.90
  -9   2   1   34.10    2.50
   2   7   1   33.00    2.40
  -9   2   1   36.30    2.30
  10  -3  -1  473.85   17.00
  -7  10  -1  464.45   16.40
  -7  10  -1  501.65   17.10
  -3  -7  -1  478.65   17.20
  -3  -7  -1  487.85   17.00
  10  -3  -1  486.75   17.20
  -7  10  -1  477.25   17.00
  -3  -7  -1  482.25   17.00
   7 -10   1  488.45   17.20
 -10   3   1  472.45   16.90
   3   7   1  478.15   17.60
 -10   3   1  469.65   17.30
   7 -10   1  466.15   16.90
   7 -10   1  457.65   16.70
   3   7   1  501.25   17.20
 -10   3   1  477.25   17.20
  -4  -7  -1    8.60    1.80
  11  -4  -1    5.50    1.80
  11  -4  -1   11.00    1.60
  11  -4  -1    7.70    1.60
  -4  -7  -1    7.60    1.80
  -4  -7  -1    8.30    1.70
  -7  11  -1    8.90    1.60
  -7  11  -1    8.20    1.40
  -7  11  -1    8.90    1.30
   7 -11   1    7.90    1.80
 -11   4   1    8.30    1.80
 -11   4   1    9.40    1.50
   7 -11   1    4.90    1.30
   4   7   1    8.40    1.60
 -11   4   1    4.50    1.60
   4   7   1    4.90    2.60
  12  -5  -1  143.99    6.40
  12  -5  -1  153.68    7.10
  -7  12  -1  149.59    5.90
  -7  12  -1  155.08    6.50
  12  -5  -1  161.78    7.00
  -5  -7  -1  155.78    6.60
  -5  -7  -1  151.48    6.70
  -5  -7  -1  162.08    8.20
   5   7   1  177.38    7.60
   7 -12   1  154.88    6.50
 -12   5   1  153.48    6.30
   5   7   1  155.58    6.60
 -12   5   1  164.08    6.90
 -12   5   1  170.58    6.80
 -12   5   1  154.68    6.90
   7 -12   1  173.98    6.70
  -7  13  -1    2.00    1.40
  -6  -7  -1    1.40    1.50
  13  -6  -1    1.80    1.60
  13  -6  -1    2.10    1.80
  -7  13  -1    1.00    1.00
  -6  -7  -1    3.80    1.90
  -6  -7  -1    0.20    1.60
  13  -6  -1    0.60    1.50
 -13   6   1    0.80    1.70
 -13   6   1    0.20    1.70
   7 -13   1    1.60    1.50
 -13   6   1    1.20    1.30
   7 -13   1    0.30    1.20
   7 -13   1    2.10    1.50
 -13   6   1    3.00    1.70
   6   7   1    2.50    1.70
  -7  -7  -1   22.90    2.90
  -7  14  -1   15.60    2.60
  14  -7  -1   14.70    2.50
  -7  14  -1   15.90    2.10
  -7  -7  -1   16.00    2.30
  -7  -7  -1   15.50    2.20
 -14   7   1   18.00    2.60
   7   7   1   19.60    2.60
   7 -14   1   17.20    2.10
   7 -14   1   20.00    2.30
   7 -14   1   15.10    2.10
 -14   7   1   19.40    2.60
 -14   7   1   20.30    2.30
  -7  15  -1   42.30    2.60
  15  -8  -1   42.80    3.90
  15  -8  -1   40.00    3.20
  -8  -7  -1   48.30    4.60
  -8  -7  -1   44.00    3.70
  -7  15  -1   48.80    4.50
  -8  -7  -1   45.20    3.80
 -15   8   1   48.40    3.00
   7 -15   1   43.80    3.30
   8   7   1   44.80    3.60
   7 -15   1   40.50    3.10
   7 -15   1   41.50    3.10
 -15   8   1   42.70    3.60
  -6  14  -1   24.40    2.40
  -8  -6  -1   23.40    2.90
  14  -8  -1   24.00    2.20
  -8  -6  -1   25.70    2.90
  -6  14  -1   24.70    2.10
  14  -8  -1   27.50    3.10
  14  -8  -1   25.30    2.60
  -8  -6  -1   25.60    2.80
 -14   8   1   19.40    2.50
 -14   8   1   26.20    2.30
   8   6   1   23.00    2.80
   6 -14   1   25.00    2.40
   6 -14   1   23.90    2.50
 -14   8   1   26.90    2.70
   6 -14   1   22.80    2.60
 -14   8   1   24.80    2.60
  -5  13  -1   26.60    2.40
  -5  13  -1   25.00    2.10
  -8  -5  -1   30.30    2.70
  13  -8  -1   35.40    3.10
  13  -8  -1   27.60    2.80
  -8  -5  -1   28.80    2.70
  13  -8  -1   26.80    2.30
  -8  -5  -1   23.40    2.80
 -13   8   1   30.70    2.60
   5 -13   1   34.10    2.60
   5 -13   1   31.90    2.50
 -13   8   1   31.80    2.80
   5 -13   1   31.00    2.50
 -13   8   1   31.80    2.80
 -13   8   1   31.00    2.20
   8   5   1   32.30    2.80
  -4  12  -1   38.40    2.70
  12  -8  -1   38.50    2.60
  -4  12  -1   45.20    2.50
  12  -8  -1   39.00    3.10
  -8  -4  -1   44.40    3.00
  12  -8  -1   44.30    3.40
  -8  -4  -1   41.00    3.10
  -8  -4  -1   41.30    3.30
 -12   8   1   42.00    3.10
 -12   8   1   47.40    2.60
   8   4   1   43.50    3.20
 -12   8   1   43.10    3.00
 -12   8   1   47.10    2.90
   4 -12   1   42.10    3.00
   8   4   1   48.10    3.20
   4 -12   1   43.70    2.80
   4 -12   1   46.30    2.70
  -8  -3  -1   13.30    2.10
  -8  -3  -1   15.30    2.20
  -8  -3  -1   15.50    2.20
  11  -8  -1   16.50    2.30
  -3  11  -1   11.20    1.60
  11  -8  -1   14.40    1.90
  -3  11  -1   13.80    1.70
 -11   8   1   21.10    3.30
   8   3   1   14.30    1.90
   3 -11   1   18.10    1.90
   3 -11   1   18.70    1.90
 -11   8   1   16.40    1.80
   3 -11   1   14.50    1.70
 -11   8   1   15.00    1.80
   8   3   1   17.90    2.20
 -11   8   1   17.20    2.00
  -8  -2  -1   91.69    4.40
  10  -8  -1   86.09    4.20
  10  -8  -1   88.89    4.50
  -2  10  -1   89.49    4.00
  -8  -2  -1   90.69    4.50
  -2  10  -1   89.89    4.00
  -2  10  -1   90.59    3.90
 -10   8   1   82.39    4.10
   8   2   1   89.39    4.20
 -10   8   1   89.19    4.40
   2 -10   1   92.69    4.10
 -10   8   1   82.69    4.70
   8   2   1   84.89    5.80
   2 -10   1   84.59    4.00
   2 -10   1   90.99    4.10
 -10   8   1   85.59    4.00
  -8  -1  -1  265.57   10.30
  -1   9  -1  259.47    9.80
   9  -8  -1  280.37   10.30
  -8  -1  -1  276.67   10.10
   9  -8  -1  257.87    9.90
  -1   9  -1  260.07    9.80
  -8  -1  -1  259.07    9.90
  -1   9  -1  275.97    9.90
  -9   8   1  276.67   10.20
   1  -9   1  281.07    9.90
   8   1   1  268.17   10.80
  -9   8   1  259.17    9.80
   1  -9   1  272.37   10.00
  -9   8   1  265.47   10.00
   8   1   1  261.87   10.00
   1  -9   1  270.87    9.80
   8   1   1  277.37   10.10
  -9   8   1  269.97   10.00
  -8   0  -1   17.80    1.90
  -8   0  -1   12.50    1.70
   0   8  -1   17.80    1.80
   0   8  -1   15.50    1.70
   0   8  -1   15.80    1.80
   8  -8  -1   18.80    2.20
   8  -8  -1   15.10    1.80
   8  -8  -1   14.50    1.50
  -8   0  -1   19.20    2.00
  -8   8   1   16.10    1.70
  -8   8   1   15.20    1.40
   8   0   1   13.60    1.70
  -8   8   1   16.00    1.40
  -8   8   1   16.70    2.00
   8   0   1   16.30    2.00
   8   0   1   20.80    2.30
   0  -8   1   14.60    1.80
  -8   1  -1  348.07   12.70
   7  -8  -1  363.26   12.70
  -8   1  -1  343.97   12.40
   1   7  -1  358.76   12.50
  -8   1  -1  361.56   12.70
   1   7  -1  317.57   12.40
   7  -8  -1  349.37   12.50
   7  -8  -1  353.06   12.40
   1   7  -1  364.06   12.50
   8  -1   1  348.87   12.60
  -1  -7   1  344.77   12.40
  -7   8   1  338.57   12.30
   8  -1   1  347.37   13.60
  -1  -7   1  346.57   12.50
  -1  -7   1  340.07   12.50
   8  -1   1  357.86   12.80
  -7   8   1  347.97   12.60
  -7   8   1  352.46   12.50
   2   6  -1   78.49    3.50
  -8   2  -1   83.69    4.20
   2   6  -1   81.49    3.60
  -8   2  -1   76.59    3.40
   2   6  -1   76.19    3.60
   6  -8  -1   84.99    3.70
   6  -8  -1   80.39    3.40
  -8   2  -1   82.79    3.80
   6  -8  -1   80.19    3.50
   8  -2   1   76.39    3.50
  -6   8   1   81.89    3.60
   8  -2   1   79.59    3.60
  -6   8   1   79.39    3.50
  -2  -6   1   73.89    3.60
  -6   8   1   78.39    3.30
  -2  -6   1   82.89    3.50
  -2  -6   1   81.29    3.60
   8  -2   1   80.69    3.80
   3   5  -1  127.79    5.20
  -8   3  -1  132.89    5.00
   5  -8  -1  135.69    5.10
   3   5  -1  132.49    5.10
  -8   3  -1  132.99    5.40
  -8   3  -1  135.29    5.30
   5  -8  -1  130.39    5.00
   3   5  -1  135.49    5.20
   5  -8  -1  132.49    5.20
  -3  -5   1  134.39    5.20
  -5   8   1  124.69    4.80
  -5   8   1  124.29    5.10
   8  -3   1  129.39    5.20
  -3  -5   1  126.49    5.10
   8  -3   1  127.39    5.60
  -3  -5   1  119.69    5.20
   8  -3   1  126.69    5.00
  -5   8   1  123.59    5.10
  -8   4  -1   53.79    2.70
   4   4  -1   50.89    2.60
  -8   4  -1   45.50    2.70
   4  -8  -1   48.90    2.50
   4   4  -1   51.69    2.50
  -8   4  -1   47.40    2.30
   4  -8  -1   50.79    2.60
   4   4  -1   49.50    2.50
   4  -8  -1   52.39    2.60
  -4   8   1   46.90    2.40
  -4   8   1   43.90    2.10
  -4   8   1   47.40    2.40
  -4  -4   1   44.20    2.40
  -4  -4   1   46.90    2.50
  -4  -4   1   45.80    2.40
   8  -4   1   46.50    2.50
   8  -4   1   46.40    2.30
   5   3  -1   98.69    4.30
   5   3  -1  107.09    4.40
  -8   5  -1  102.59    4.00
   3  -8  -1  111.89    4.30
   5   3  -1  107.49    4.30
  -8   5  -1  107.19    4.40
   3  -8  -1  110.69    4.30
  -8   5  -1  102.19    4.30
  -8   5  -1  101.09    4.40
  -5  -3   1  102.79    4.30
   8  -5   1  104.69    4.10
  -3   8   1   99.19    4.00
   8  -5   1  103.19    4.30
  -3   8   1  102.79    4.30
  -3   8   1  100.59    4.20
  -5  -3   1  104.19    4.40
  -5  -3   1  104.89    4.30
   8  -5   1  103.19    4.60
  -8   6  -1  229.88    8.70
  -8   6  -1  239.68    8.90
   6   2  -1  244.48    9.00
  -8   6  -1  241.68    9.00
   6   2  -1  235.28    8.90
   2  -8  -1  235.58    8.80
   2  -8  -1  231.98    8.80
   6   2  -1  240.28    9.00
  -8   6  -1  234.28    8.50
   2  -8  -1  255.97    8.90
  -6  -2   1  232.48    8.80
  -2   8   1  237.38    8.70
  -6  -2   1  245.08    8.90
   8  -6   1  238.18    8.60
  -6  -2   1  246.38    9.10
   8  -6   1  251.77    8.90
   8  -6   1  253.27    9.20
  -2   8   1  247.78    8.90
  -2   8   1  251.57    8.90
   7   1  -1  338.67   12.50
  -8   7  -1  329.37   12.00
   1  -8  -1  335.87   12.20
  -8   7  -1  337.57   12.30
  -8   7  -1  340.67   12.40
   7   1  -1  344.67   12.40
   1  -8  -1  336.97   12.30
   1  -8  -1  354.06   12.30
  -8   7  -1  330.37   11.90
   7   1  -1  328.57   12.30
  -1   8   1  360.46   12.30
   8  -7   1  345.87   12.30
   8  -7   1  351.66   12.60
  -7  -1   1  335.47   12.30
  -1   8   1  349.27   12.10
  -7  -1   1  356.76   12.60
  -7  -1   1  355.46   12.40
  -1   8   1  344.07   12.30
  -8   8  -1  289.57   10.10
  -8   8  -1  291.97   10.60
   0  -8  -1  297.37   10.60
   8   0  -1  281.37   10.60
  -8   8  -1  294.77   10.70
   8   0  -1  290.57   10.60
   8   0  -1  301.17   10.90
  -8   8  -1  282.97   10.20
   0  -8  -1  284.07   10.60
   8  -8   1  294.67   10.30
   0   8   1  285.37   10.60
  -8   0   1  274.47   10.50
  -8   0   1  292.47   10.70
   0   8   1  281.67   10.40
   0   8   1  291.87   10.50
   8  -8   1  306.97   10.90
  -8   0   1  284.77   10.80
   8  -8   1  281.77   10.50
  -8   9  -1  150.28    5.70
  -8   9  -1  154.98    6.20
  -8   9  -1  158.48    6.20
   9  -1  -1  149.59    6.20
  -1  -8  -1  148.59    6.30
  -1  -8  -1  156.18    6.10
  -1  -8  -1  159.28    6.20
   9  -1  -1  158.28    6.20
  -8   9  -1  145.79    5.60
   8  -9   1  156.78    5.80
   1   8   1  141.19    7.10
   8  -9   1  157.78    6.40
   8  -9   1  157.88    6.10
   1   8   1  149.39    6.00
  -9   1   1  146.69    6.10
  -9   1   1  156.48    6.40
   1   8   1  156.18    6.10
  -9   1   1  157.48    6.40
  -2  -8  -1  382.26   14.10
  -2  -8  -1  406.46   14.10
  10  -2  -1  384.56   14.00
  -8  10  -1  386.36   14.00
  10  -2  -1  438.06   16.30
  -8  10  -1  370.26   13.40
  -2  -8  -1  402.46   14.00
  10  -2  -1  405.16   14.20
  -8  10  -1  382.86   14.00
   8 -10   1  368.16   13.60
 -10   2   1  385.16   14.10
   2   8   1  378.26   14.00
   2   8   1  382.36   14.00
   8 -10   1  371.36   13.80
   8 -10   1  392.36   14.30
 -10   2   1  369.86   14.20
 -10   2   1  382.66   13.90
  -3  -8  -1   17.00    2.10
  -8  11  -1   18.70    1.90
  -8  11  -1   18.30    2.00
  -3  -8  -1   17.20    2.10
  -3  -8  -1   19.30    2.30
  -8  11  -1   15.30    1.30
  11  -3  -1   18.40    3.40
  11  -3  -1   15.10    2.10
  11  -3  -1   19.00    2.40
 -11   3   1   14.60    2.10
 -11   3   1   13.90    2.00
   3   8   1   13.80    1.80
 -11   3   1   15.70    1.90
   8 -11   1   16.70    2.10
   8 -11   1   15.80    1.60
   8 -11   1   14.80    1.90
  12  -4  -1  125.89    5.90
  -4  -8  -1  116.19    5.50
  -4  -8  -1  124.39    5.30
  12  -4  -1  114.79    5.20
  -4  -8  -1  111.49    6.90
  -8  12  -1  108.29    4.50
  -8  12  -1  122.59    5.20
   8 -12   1  111.19    5.10
   8 -12   1  114.39    5.40
 -12   4   1  119.39    5.40
 -12   4   1  118.19    5.10
   4   8   1  123.39    5.60
   8 -12   1  124.79    5.40
   4   8   1  113.69    5.20
 -12   4   1  113.89    5.50
  -5  -8  -1    8.10    1.80
  -8  13  -1    3.60    1.00
  -8  13  -1    6.20    1.60
  -5  -8  -1    5.30    1.80
  13  -5  -1    6.20    1.60
  -5  -8  -1    3.50    1.80
  13  -5  -1    5.30    2.00
 -13   5   1    4.80    1.70
 -13   5   1    1.20    1.50
   8 -13   1    3.70    1.70
   8 -13   1    4.20    1.40
 -13   5   1    4.90    1.70
   8 -13   1    1.60    1.20
   5   8   1    7.20    1.80
  -8  14  -1   66.09    3.20
  -8  14  -1   73.59    4.40
  -6  -8  -1   63.29    4.10
  -6  -8  -1   74.79    4.10
  14  -6  -1   72.79    4.10
  -6  -8  -1   72.39    4.20
  14  -6  -1   72.29    4.50
 -14   6   1   75.29    4.40
   8 -14   1   76.69    4.20
 -14   6   1   76.19    3.90
   6   8   1   75.99    4.40
   8 -14   1   71.29    3.80
 -14   6   1   65.99    4.20
   8 -14   1   67.99    3.60
  15  -7  -1   44.40    4.00
  -7  -8  -1   49.00    3.50
  -8  15  -1   52.59    4.20
  -8  15  -1   38.90    3.80
  -7  -8  -1   44.20    3.70
 -15   7   1   43.30    3.70
 -15   7   1   39.40    3.10
   8 -15   1   43.10    3.40
   8 -15   1   56.09    3.90
   8 -15   1   41.40    3.00
   7   8   1   47.40    3.60
  -8  -8  -1   60.19    4.40
  -8  -8  -1   52.49    4.80
  -8  16  -1   66.59    4.10
  16  -8  -1   63.29    5.20
  -8  -8  -1   61.99    4.30
  -8  16  -1   64.09    3.20
 -16   8   1   62.99    4.50
   8 -16   1   67.39    3.80
   8 -16   1   59.09    4.10
   8   8   1   63.99    4.60
 -16   8   1   69.29    3.90
   8 -16   1   56.89    4.10
  -9  -8  -1   56.79    4.40
  -8  17  -1   45.40    4.30
  -9  -8  -1   43.20    4.40
  17  -9  -1   59.59    5.10
  -9  -8  -1   52.19    4.10
   9   8   1   50.19    4.40
 -17   9   1   52.99    4.30
   8 -17   1   52.69    3.70
   8 -17   1   55.39    3.80
 -17   9   1   52.39    4.10
   8 -17   1   61.69    4.20
  -7  16  -1   49.50    3.50
  -9  -7  -1   52.29    5.90
  -9  -7  -1   50.19    3.90
  16  -9  -1   49.60    4.70
  -7  16  -1   60.59    3.60
  -9  -7  -1   46.90    4.40
 -16   9   1   52.99    3.40
   7 -16   1   51.99    3.40
   9   7   1   45.20    4.20
   7 -16   1   51.39    3.80
   7 -16   1   49.99    3.80
 -16   9   1   45.90    4.00
  -9  -6  -1   54.29    3.90
  -6  15  -1   57.79    3.20
  15  -9  -1   58.79    4.30
  15  -9  -1   56.29    3.70
  -9  -6  -1   48.60    4.50
  15  -9  -1   57.29    3.80
  -9  -6  -1   56.89    4.20
   6 -15   1   49.80    3.60
   9   6   1   51.09    4.20
   6 -15   1   47.70    3.60
   6 -15   1   57.59    3.50
 -15   9   1   55.49    4.20
 -15   9   1   57.59    3.40
  14  -9  -1   10.70    2.10
  14  -9  -1    6.90    2.50
  -5  14  -1    9.90    1.50
  -5  14  -1   10.70    1.90
  -9  -5  -1    9.60    2.10
  -9  -5  -1   12.60    2.10
  -9  -5  -1   10.80    2.30
  14  -9  -1    7.80    1.60
 -14   9   1    9.80    1.60
   9   5   1    8.50    2.10
 -14   9   1    7.00    2.00
   5 -14   1   10.00    2.00
   5 -14   1    8.60    1.80
   5 -14   1    9.10    2.30
 -14   9   1    9.80    1.70
  -4  13  -1   55.79    2.90
  -9  -4  -1   52.39    3.80
  -9  -4  -1   53.09    3.70
  13  -9  -1   57.59    4.10
  -4  13  -1   54.39    3.20
  13  -9  -1   53.79    5.00
  -9  -4  -1   51.39    3.50
   9   4   1   59.39    3.90
   4 -13   1   55.59    3.30
 -13   9   1   51.99    3.50
   4 -13   1   56.69    3.40
 -13   9   1   57.59    3.00
   4 -13   1   57.89    3.30
 -13   9   1   51.89    3.80
  12  -9  -1    7.80    1.60
  -9  -3  -1    8.10    1.80
  -9  -3  -1   10.30    1.80
  -3  12  -1   11.20    1.40
  12  -9  -1    8.10    1.90
  -9  -3  -1   12.00    1.90
  -3  12  -1    9.40    1.70
   3 -12   1    8.50    1.60
   3 -12   1    7.70    1.70
 -12   9   1   11.80    1.40
 -12   9   1    9.10    1.30
   9   3   1    4.80    1.70
 -12   9   1    5.50    1.60
   3 -12   1    9.40    1.70
 -12   9   1    7.10    1.70
   9   3   1    8.20    1.70
  -9  -2  -1   67.99    3.80
  -9  -2  -1   63.39    3.70
  -2  11  -1   62.99    3.20
  -9  -2  -1   72.39    3.80
  11  -9  -1   65.79    3.90
  11  -9  -1   65.29    3.60
  -2  11  -1   64.19    3.30
 -11   9   1   66.59    3.20
 -11   9   1   64.79    3.30
   2 -11   1   60.99    3.40
   2 -11   1   64.89    3.60
 -11   9   1   63.29    3.60
   2 -11   1   65.99    3.40
 -11   9   1   61.19    3.70
   9   2   1   63.59    3.80
   9   2   1   64.09    3.50
  -1  10  -1  105.69    4.60
  -9  -1  -1  106.69    4.80
  10  -9  -1  103.29    4.70
  -9  -1  -1  103.79    5.10
  10  -9  -1  111.19    5.30
  -1  10  -1  109.09    4.70
  -1  10  -1  108.39    4.70
  -9  -1  -1  107.99    5.00
   1 -10   1  109.49    4.80
 -10   9   1  113.09    5.40
   9   1   1  114.69    5.30
   1 -10   1  107.29    4.80
   9   1   1  117.89    5.20
 -10   9   1  107.89    4.50
 -10   9   1  112.59    5.50
   1 -10   1  113.49    4.90
  -9   0  -1  197.58    7.80
   0   9  -1  193.08    7.50
   9  -9  -1  201.68    7.90
   9  -9  -1  187.68    7.50
  -9   0  -1  204.48    8.10
   0   9  -1  193.78    7.60
  -9   0  -1  197.58    7.60
   0   9  -1  202.88    7.60
   9   0   1  205.68    7.80
   0  -9   1  186.48    7.60
  -9   9   1  197.18    7.80
   9   0   1  203.28    8.00
  -9   9   1  196.78    7.90
  -9   9   1  187.28    7.30
   0  -9   1  194.68    7.50
  -9   1  -1  267.97    9.80
   1   8  -1  260.67    9.80
   8  -9  -1  266.07    9.80
   8  -9  -1  272.57   10.10
  -9   1  -1  260.77   10.20
  -9   1  -1  267.57   10.10
   1   8  -1  268.07    9.80
   1   8  -1  275.77    9.90
   8  -9  -1  262.87    9.70
  -8   9   1  265.67    9.60
  -8   9   1  269.87   11.20
   9  -1   1  262.17    9.90
   9  -1   1  272.07   10.00
  -1  -8   1  267.27    9.80
  -1  -8   1  255.07    9.90
  -8   9   1  267.17    9.90
  -1  -8   1  259.77    9.80
   9  -1   1  269.77   10.30
  -8   9   1  267.57    9.90
  -9   2  -1  154.08    6.30
   7  -9  -1  158.58    6.30
   7  -9  -1  159.78    6.30
   7  -9  -1  176.58    6.70
  -9   2  -1  174.38    7.80
  -9   2  -1  161.28    6.70
   2   7  -1  170.08    6.40
   2   7  -1  161.28    6.50
   2   7  -1  160.68    6.40
  -2  -7   1  157.88    6.50
  -7   9   1  165.08    6.40
   9  -2   1  167.38    6.60
  -7   9   1  159.08    6.10
  -2  -7   1  156.98    6.40
  -2  -7   1  165.48    6.40
   9  -2   1  163.38    6.40
   9  -2   1  171.48    6.80
  -7   9   1  160.88    6.50
   3   6  -1  316.67   12.30
   3   6  -1  312.37   11.30
   6  -9  -1  309.07   11.30
  -9   3  -1  301.67   11.50
   6  -9  -1  297.17   11.10
  -9   3  -1  303.97   11.00
   3   6  -1  307.17   11.20
  -9   3  -1  306.47   11.50
   9  -3   1  311.97   11.10
  -3  -6   1  308.57   11.20
   9  -3   1  313.77   11.50
  -3  -6   1  310.37   11.10
  -6   9   1  312.77   11.20
  -3  -6   1  301.87   11.30
   9  -3   1  314.27   11.30
  -6   9   1  303.47   10.80
  -6   9   1  315.57   11.20
   4   5  -1    9.20    1.30
   5  -9  -1    8.00    1.30
  -9   4  -1    6.40    1.70
   4   5  -1    6.40    1.40
   5  -9  -1    9.90    1.30
   4   5  -1    7.30    1.30
  -9   4  -1   10.50    1.30
   5  -9  -1    7.60    1.40
  -9   4  -1    7.40    1.30
  -5   9   1    9.40    1.30
   9  -4   1   11.00    1.30
  -4  -5   1    8.20    1.40
  -5   9   1    9.70    1.30
  -4  -5   1    8.80    1.30
   9  -4   1   11.60    1.70
   9  -4   1    9.20    1.30
   4  -9  -1   58.49    2.90
   5   4  -1   58.59    2.90
   4  -9  -1   58.79    2.80
  -9   5  -1   60.19    2.90
  -9   5  -1   60.49    3.10
   5   4  -1   57.79    3.10
   5   4  -1   55.59    2.90
  -9   5  -1   61.29    3.00
   4  -9  -1   55.39    2.90
   9  -5   1   59.29    3.30
   9  -5   1   63.99    3.00
  -4   9   1   57.89    2.80
  -5  -4   1   58.99    3.10
  -5  -4   1   53.19    2.90
  -5  -4   1   57.29    2.90
  -4   9   1   56.89    2.80
  -4   9   1   55.29    2.60
   9  -5   1   58.19    2.70
  -9   6  -1   84.39    3.70
   3  -9  -1   83.89    3.70
   6   3  -1   85.49    3.90
   6   3  -1   76.09    3.80
   6   3  -1   83.89    3.90
  -9   6  -1   88.39    3.90
  -9   6  -1   76.19    3.80
  -9   6  -1   79.79    4.10
   3  -9  -1   81.59    3.70
   3  -9  -1   87.29    3.80
  -6  -3   1   74.19    3.70
  -3   9   1   75.69    3.40
   9  -6   1   82.29    3.50
  -6  -3   1   84.69    4.00
   9  -6   1   85.59    3.80
  -6  -3   1   81.39    3.80
   9  -6   1   92.69    4.20
  -3   9   1   86.59    3.70
   7   2  -1   41.80    2.60
  -9   7  -1   37.40    2.50
   2  -9  -1   39.30    2.40
  -9   7  -1   36.00    2.10
  -9   7  -1   39.20    2.50
  -9   7  -1   36.20    2.00
   7   2  -1   38.50    2.70
   2  -9  -1   37.30    2.50
   2  -9  -1   39.40    2.30
   9  -7   1   37.90    2.60
  -2   9   1   42.40    2.30
  -7  -2   1   35.40    2.40
   9  -7   1   38.80    2.30
  -2   9   1   37.60    2.60
  -7  -2   1   35.80    2.50
  -2   9   1   35.40    2.30
   1  -9  -1  156.68    6.20
   1  -9  -1  153.88    6.20
   8   1  -1  150.48    6.80
   8   1  -1  157.68    6.30
   1  -9  -1  151.58    6.10
  -9   8  -1  151.18    5.70
  -9   8  -1  152.58    5.60
  -9   8  -1  155.98    6.20
   8   1  -1  151.58    6.40
  -9   8  -1  143.99    7.40
  -8  -1   1  145.69    6.20
  -8  -1   1  156.98    6.30
  -1   9   1  152.18    5.90
   9  -8   1  155.08    6.10
  -1   9   1  156.88    6.10
  -8  -1   1  148.69    6.50
   9  -8   1  156.68    6.50
  -9   9  -1   70.49    3.80
  -9   9  -1   75.29    3.10
  -9   9  -1   74.09    3.80
   0  -9  -1   73.09    3.70
   9   0  -1   70.29    5.70
   9   0  -1   66.39    5.40
   0  -9  -1   80.09    3.70
  -9   9  -1   78.29    3.10
  -9   0   1   69.19    4.10
   9  -9   1   75.19    3.60
   0   9   1   74.79    3.60
   0   9   1   66.29    3.70
  -9   0   1   71.29    3.60
  -9   0   1   73.49    4.00
   9  -9   1   75.49    3.90
   0   9   1   73.49    3.80
  10  -1  -1  236.28   10.70
  -9  10  -1  225.48    8.70
  -1  -9  -1  237.78    8.70
  -1  -9  -1  228.18    8.70
  -9  10  -1  226.78    8.10
  -9  10  -1  235.58    8.20
  -1  -9  -1  231.38    8.80
  10  -1  -1  231.18    9.00
  -9  10  -1  239.98    8.80
   9 -10   1  222.98    8.70
   1   9   1  219.18    8.70
 -10   1   1  213.58    9.10
 -10   1   1  225.18    8.90
   9 -10   1  224.68    8.30
   9 -10   1  236.28    9.10
   1   9   1  220.08    8.70
 -10   1   1  220.78    8.60
  -9  11  -1   13.60    1.90
  -9  11  -1   14.90    1.40
  11  -2  -1   15.20    1.90
  -2  -9  -1   14.90    1.90
  -9  11  -1   12.10    2.00
  -2  -9  -1   16.00    2.00
  -2  -9  -1   16.50    2.00
  11  -2  -1   13.40    2.10
  -9  11  -1   15.20    1.30
   9 -11   1   14.90    1.80
 -11   2   1   16.80    2.10
 -11   2   1   11.30    1.90
   2   9   1   13.20    1.70
   9 -11   1   13.10    1.90
   2   9   1   16.60    3.10
 -11   2   1   14.60    1.80
   9 -11   1   14.10    1.50
  -3  -9  -1   89.19    6.50
  -9  12  -1   91.89    4.40
  -3  -9  -1   86.79    4.50
  -9  12  -1   87.79    3.60
  12  -3  -1   91.29    4.80
  12  -3  -1   84.99    4.50
  -3  -9  -1   88.89    4.40
 -12   3   1   92.09    4.70
   9 -12   1   85.49    3.90
   9 -12   1   95.59    4.60
 -12   3   1   90.99    4.60
   9 -12   1   95.59    4.40
   3   9   1   90.89    4.70
 -12   3   1   90.79    4.40
  -9  13  -1   14.70    2.30
  13  -4  -1   13.10    2.00
  13  -4  -1   17.90    2.60
  -4  -9  -1   10.00    1.80
  -9  13  -1   11.50    1.20
  -4  -9  -1   13.90    2.10
  -4  -9  -1   14.30    2.00
 -13   4   1   11.20    2.10
   9 -13   1   15.50    2.00
 -13   4   1   10.10    1.70
   9 -13   1   15.90    1.90
 -13   4   1   11.20    2.10
   4   9   1   16.10    2.60
   9 -13   1   12.40    1.50
  -5  -9  -1  118.09    5.80
  -5  -9  -1  120.59    5.70
  14  -5  -1  116.99    5.70
  -5  -9  -1  121.89    5.80
  -9  14  -1  114.39    6.70
  14  -5  -1  122.49    6.40
  -9  14  -1  112.09    4.70
 -14   5   1  123.29    5.50
   9 -14   1  116.89    5.20
   9 -14   1  129.29    5.60
   5   9   1  136.99    6.00
   9 -14   1  133.19    5.90
 -14   5   1  131.09    6.20
 -14   5   1  120.19    6.00
  -6  -9  -1   21.30    2.50
  -9  15  -1   15.90    1.90
  -6  -9  -1   21.80    3.10
  -9  15  -1   19.10    2.30
  15  -6  -1   17.90    2.80
  -6  -9  -1   18.30    2.40
 -15   6   1   18.90    2.70
   9 -15   1   15.60    2.00
   9 -15   1   21.30    2.80
 -15   6   1   24.30    2.70
 -15   6   1   14.90    2.60
   9 -15   1   19.20    2.30
   6   9   1   19.00    2.50
  -7  -9  -1   51.29    4.50
  -9  16  -1   50.49    3.90
  -7  -9  -1   49.50    3.80
  -7  -9  -1   52.29    5.10
  16  -7  -1   51.29    4.40
  -9  16  -1   51.49    5.20
   7   9   1   50.09    4.30
   9 -16   1   47.10    3.60
   9 -16   1   58.29    4.10
 -16   7   1   65.19    5.60
 -16   7   1   57.29    4.60
   9 -16   1   54.39    3.30
  -9  17  -1   20.50    2.90
  17  -8  -1   19.10    3.20
  -8  -9  -1   19.90    3.10
  -8  -9  -1   18.50    2.80
  -8  -9  -1   19.30    3.20
  -9  17  -1   16.20    2.20
 -17   8   1   20.40    3.00
 -17   8   1   19.90    2.90
   9 -17   1   24.50    3.20
   9 -17   1   15.90    2.10
   9 -17   1   16.20    2.50
   8   9   1   19.60    2.80
  -9  -9  -1   66.79    4.80
  18  -9  -1   69.19    6.20
  -9  -9  -1   63.79    4.70
  -9  18  -1   68.29    4.50
  -9  -9  -1   66.29    4.80
 -18   9   1   54.49    4.50
   9 -18   1   57.49    3.80
   9 -18   1   57.29    4.70
 -18   9   1   62.69    4.00
   9   9   1   54.79    4.40
   9 -18   1   60.89    4.30
 -10  -9  -1    3.70    2.60
  -9  19  -1    3.60    2.30
  19 -10  -1    0.40    2.60
 -10  -9  -1    4.80    2.60
   9 -19   1    3.30    1.90
   9 -19   1    3.50    1.70
   9 -19   1    5.30    2.50
 -19  10   1    2.00    2.00
  10   9   1    3.80    2.30
 -10  -8  -1   41.60    4.20
 -10  -8  -1   42.30    4.40
  -8  18  -1   40.70    3.50
 -10  -8  -1   38.70    3.80
   8 -18   1   40.80    3.50
   8 -18   1   45.40    3.80
 -18  10   1   36.90    5.40
 -18  10   1   31.20    3.90
   8 -18   1   32.80    3.40
  10   8   1   42.30    4.30
 -10  -7  -1   28.50    3.50
  17 -10  -1   29.30    3.70
 -10  -7  -1   28.30    3.80
 -10  -7  -1   33.40    4.00
  -7  17  -1   27.00    4.60
   7 -17   1   25.70    3.00
 -17  10   1   33.90    4.10
   7 -17   1   29.50    3.10
 -17  10   1   24.80    2.90
  10   7   1   24.90    3.20
   7 -17   1   31.30    3.40
  16 -10  -1   66.69    4.90
  -6  16  -1   65.89    3.90
 -10  -6  -1   64.49    4.40
 -10  -6  -1   60.29    4.40
 -16  10   1   71.69    3.80
   6 -16   1   64.89    4.00
   6 -16   1   64.99    4.20
   6 -16   1   59.09    3.90
 -16  10   1   67.19    4.50
  10   6   1   56.79    4.30
  15 -10  -1   59.49    3.90
 -10  -5  -1   61.09    4.50
  15 -10  -1   60.79    4.50
 -10  -5  -1   67.19    4.50
 -10  -5  -1   65.19    4.10
   5 -15   1   64.39    4.20
 -15  10   1   60.69    3.50
 -15  10   1   64.99    4.20
   5 -15   1   61.99    4.00
   5 -15   1   61.79    4.00
 -15  10   1   58.89    3.70
  10   5   1   68.79    4.40
  14 -10  -1   24.90    2.60
 -10  -4  -1   33.10    4.30
  14 -10  -1   28.80    3.30
  -4  14  -1   30.10    2.50
 -10  -4  -1   31.10    2.90
 -10  -4  -1   33.20    3.40
 -14  10   1   25.80    3.00
 -14  10   1   28.30    2.50
   4 -14   1   33.10    3.30
 -14  10   1   28.60    2.50
   4 -14   1   28.90    2.90
  10   4   1   26.50    3.10
   4 -14   1   30.10    2.80
  -3  13  -1   65.89    3.80
  13 -10  -1   63.59    4.50
 -10  -3  -1   64.49    3.80
 -10  -3  -1   69.79    4.60
 -10  -3  -1   64.19    4.10
  10   3   1   68.89    4.10
   3 -13   1   64.29    3.70
 -13  10   1   69.89    3.40
 -13  10   1   71.49    4.30
 -13  10   1   65.39    3.50
 -13  10   1   66.49    4.50
   3 -13   1   69.19    3.90
   3 -13   1   66.29    3.70
  12 -10  -1   -0.40    1.50
  12 -10  -1   -1.40    1.40
 -10  -2  -1   -0.30    1.40
  -2  12  -1   -2.30    1.40
 -10  -2  -1   -1.40    1.40
 -12  10   1    0.40    1.00
   2 -12   1    1.10    1.40
  10   2   1   -2.90    1.40
   2 -12   1   -0.40    1.40
 -12  10   1   -1.40    1.40
  10   2   1   -0.60    1.70
 -12  10   1    0.40    1.00
   2 -12   1   -2.10    1.40
 -12  10   1   -0.30    1.40
  11 -10  -1   81.09    4.00
 -10  -1  -1   82.99    4.60
 -10  -1  -1   82.39    4.30
 -10  -1  -1   84.69    4.30
  -1  11  -1   81.19    3.90
  11 -10  -1   86.19    4.50
   1 -11   1   83.09    4.00
 -11  10   1   81.59    4.20
 -11  10   1   85.39    3.70
   1 -11   1   84.89    4.00
  10   1   1   87.69    4.60
  10   1   1   83.59    4.10
 -11  10   1   79.19    3.70
 -11  10   1   80.79    4.30
   1 -11   1   79.09    4.00
  10 -10  -1    4.30    1.60
 -10   0  -1    4.50    1.60
 -10   0  -1    6.20    1.60
   0  10  -1    4.50    1.40
  10 -10  -1    4.20    1.20
  10 -10  -1    4.90    1.40
 -10   0  -1    2.70    1.40
 -10  10   1    3.90    1.40
 -10  10   1    3.90    1.00
   0 -10   1    2.70    1.30
   0 -10   1    6.20    1.40
  10   0   1    7.20    1.80
  10   0   1    6.20    2.80
 -10  10   1    5.10    2.00
 -10  10   1    3.40    1.30
   9 -10  -1  111.29    5.10
   1   9  -1  108.29    4.90
 -10   1  -1  115.09    5.10
   9 -10  -1  115.09    4.90
 -10   1  -1  110.49    4.90
   9 -10  -1  113.59    5.10
 -10   1  -1  110.49    5.30
   1   9  -1  117.19    5.00
  -9  10   1  104.49    4.40
  -9  10   1  106.19    4.90
  10  -1   1  102.59    5.20
  -9  10   1  109.29    5.20
  -9  10   1  110.29    4.50
  10  -1   1  108.79    5.10
  -1  -9   1  119.29    5.00
  -1  -9   1  109.79    4.90
  -1  -9   1  101.99    4.80
 -10   2  -1   84.09    4.10
 -10   2  -1   85.09    4.40
 -10   2  -1   91.19    4.50
   2   8  -1   85.89    4.20
   2   8  -1   91.89    4.10
   8 -10  -1   86.99    4.00
   8 -10  -1   95.89    4.40
  10  -2   1   81.49    4.00
  -2  -8   1   92.59    4.10
  -2  -8   1   89.49    4.20
  -8  10   1   81.39    3.70
  -8  10   1   93.39    4.40
  10  -2   1   88.49    4.40
  10  -2   1   90.09    4.50
  -8  10   1  101.09    5.50
  -2  -8   1   88.59    4.20
 -10   3  -1   51.69    3.30
   7 -10  -1   52.29    3.10
 -10   3  -1   58.49    3.00
   3   7  -1   51.29    2.90
   7 -10  -1   49.50    2.80
   3   7  -1   58.59    3.20
 -10   3  -1   52.69    3.20
   7 -10  -1   49.99    2.90
  -7  10   1   57.29    4.30
  10  -3   1   52.49    3.10
  10  -3   1   62.39    3.70
  -7  10   1   60.89    3.30
  -7  10   1   50.89    2.50
  -3  -7   1   56.79    3.00
  -3  -7   1   51.29    3.20
  10  -3   1   47.90    2.80
  -3  -7   1   62.99    3.20
   6 -10  -1   68.39    3.60
 -10   4  -1   66.19    3.80
   6 -10  -1   66.99    3.40
   4   6  -1   65.09    3.40
 -10   4  -1   68.29    4.10
 -10   4  -1   70.89    3.30
   4   6  -1   67.39    3.70
  -4  -6   1   72.99    3.50
  -4  -6   1   79.39    3.50
  10  -4   1   76.79    3.90
  -4  -6   1   67.19    3.70
  10  -4   1   78.69    3.40
  -6  10   1   71.29    3.50
  10  -4   1   76.19    3.70
  -6  10   1   75.19    3.10
 -10   5  -1   -2.60    1.10
   5   5  -1   -1.90    1.10
   5 -10  -1   -2.50    1.20
   5 -10  -1    0.30    0.90
   5 -10  -1   -1.50    1.20
 -10   5  -1   -0.50    0.90
 -10   5  -1   -0.20    1.20
  10  -5   1    0.40    1.30
  10  -5   1    1.00    0.90
  -5  10   1    1.10    0.80
  -5  -5   1   -2.40    1.10
  -5  -5   1   -0.20    1.20
  10  -5   1    0.10    1.20
  -5  10   1   -2.30    1.10
  -5  -5   1   -1.90    1.20
  -5  10   1   -0.40    2.00
   4 -10  -1   93.19    4.30
   4 -10  -1  110.69    4.40
   4 -10  -1   99.69    4.30
 -10   6  -1   98.19    4.50
   6   4  -1  102.29    4.50
 -10   6  -1   94.39    4.00
   6   4  -1   98.89    4.50
 -10   6  -1   92.79    4.40
 -10   6  -1  104.69    5.70
  -4  10   1   96.09    4.70
  -6  -4   1   96.89    4.40
  -4  10   1   95.29    4.20
  10  -6   1   89.99    4.10
  -6  -4   1   92.39    4.50
  10  -6   1  100.69    4.70
  10  -6   1   97.49    4.30
  -6  -4   1   96.59    4.70
  -4  10   1   98.89    4.10
   7   3  -1  472.85   16.90
   3 -10  -1  469.15   16.70
   7   3  -1  474.15   16.80
 -10   7  -1  447.86   16.60
 -10   7  -1  452.95   16.30
 -10   7  -1  456.55   17.30
   3 -10  -1  469.85   16.60
   3 -10  -1  460.25   16.70
  10  -7   1  501.05   17.10
  -3  10   1  486.55   16.70
  -7  -3   1  464.05   16.70
  10  -7   1  453.15   16.40
  -3  10   1  479.55   16.60
  -7  -3   1  478.45   16.80
  -7  -3   1  471.95   16.90
  10  -7   1  478.25   16.70
  -3  10   1  460.85   17.40
 -10   8  -1  365.56   14.00
   2 -10  -1  378.26   13.80
 -10   8  -1  380.96   14.00
 -10   8  -1  369.36   13.60
   2 -10  -1  378.96   13.80
   8   2  -1  394.56   14.10
   8   2  -1  377.56   13.90
 -10   8  -1  367.66   13.50
   2 -10  -1  370.46   13.80
  -2  10   1  381.16   13.70
  10  -8   1  385.76   13.80
  -8  -2   1  388.86   13.90
  -8  -2   1  390.66   13.80
  -2  10   1  379.66   13.50
  -2  10   1  386.16   13.80
  -8  -2   1  395.86   14.20
  10  -8   1  397.06   14.20
   1 -10  -1  218.18    8.60
 -10   9  -1  225.68    8.10
   9   1  -1  226.08    9.60
   1 -10  -1  213.78    8.60
   9   1  -1  233.38    8.80
 -10   9  -1  216.68    8.80
 -10   9  -1  223.38    8.90
   1 -10  -1  225.08    8.70
 -10   9  -1  214.58    8.20
  10  -9   1  234.58    9.10
  -1  10   1  228.58    8.50
  -1  10   1  222.48    8.60
  -9  -1   1  230.28    9.00
  -9  -1   1  240.28    8.90
  -9  -1   1  230.78    8.70
  -1  10   1  227.48    8.60
  10  -9   1  229.58    8.60
 -10  10  -1  218.88    8.80
   0 -10  -1  224.08    8.70
  10   0  -1  234.38   10.80
  10   0  -1  228.38    8.80
   0 -10  -1  229.58    8.70
   0 -10  -1  223.88    8.80
 -10  10  -1  221.68    8.10
 -10  10  -1  215.28    8.10
 -10  10  -1  218.08    8.70
 -10   0   1  220.78    9.00
 -10   0   1  235.58    8.90
  10 -10   1  224.48    8.60
   0  10   1  233.68    9.20
  10 -10   1  227.78    9.00
   0  10   1  219.78    8.60
 -10   0   1  214.18    8.60
  -1 -10  -1   51.29    3.30
 -10  11  -1   54.89    3.90
 -10  11  -1   50.69    2.50
  -1 -10  -1   50.69    3.20
  -1 -10  -1   49.70    3.10
  11  -1  -1   56.09    3.80
 -10  11  -1   48.80    2.40
  11  -1  -1   54.09    3.40
   1  10   1   51.79    3.50
  10 -11   1   53.69    2.60
 -11   1   1   51.09    3.50
 -11   1   1   48.80    3.10
   1  10   1   55.19    3.90
  10 -11   1   48.40    2.90
  10 -11   1   55.69    3.40
 -11   1   1   52.89    3.30
  -2 -10  -1  119.19    5.50
  12  -2  -1  116.69    5.70
 -10  12  -1  115.19    4.50
 -10  12  -1  115.19    4.70
  12  -2  -1  121.59    5.40
  -2 -10  -1  123.79    5.50
  -2 -10  -1  119.69    7.00
  10 -12   1  115.79    5.50
 -12   2   1  121.29    5.50
 -12   2   1  117.79    5.80
  10 -12   1  111.69    5.10
   2  10   1  118.39    5.50
  10 -12   1  119.19    4.80
 -12   2   1  120.49    5.30
  -3 -10  -1   10.00    2.00
  13  -3  -1    6.80    2.00
  -3 -10  -1   10.30    2.00
 -10  13  -1    8.80    1.00
  13  -3  -1    8.00    2.10
 -10  13  -1    9.70    2.20
  -3 -10  -1    7.70    1.90
   3  10   1    9.50    2.20
  10 -13   1   11.60    2.20
 -13   3   1    8.50    2.00
 -13   3   1    7.40    2.20
 -13   3   1    8.80    2.00
  10 -13   1   10.40    1.70
 -10  14  -1   42.30    2.20
 -10  14  -1   44.30    3.40
  -4 -10  -1   40.40    3.20
  -4 -10  -1   40.40    3.40
  -4 -10  -1   44.90    3.60
  14  -4  -1   44.00    3.70
 -14   4   1   47.50    3.60
 -14   4   1   44.40    3.60
   4  10   1   50.59    3.60
  10 -14   1   47.40    2.90
  10 -14   1   41.20    3.00
 -14   4   1   47.90    4.00
  10 -14   1   42.30    3.50
  -5 -10  -1    5.30    2.20
  -5 -10  -1    5.10    2.50
  -5 -10  -1    9.80    2.30
  15  -5  -1    4.80    2.50
 -10  15  -1    6.20    2.50
   5  10   1   10.50    2.40
 -15   5   1    6.50    2.30
 -15   5   1    6.40    2.00
 -15   5   1    9.20    2.50
  10 -15   1    8.30    2.20
  10 -15   1    5.80    1.80
  10 -15   1    7.90    1.40
 -10  16  -1  105.59    6.40
  -6 -10  -1  107.89    5.90
  16  -6  -1  104.29    6.00
 -10  16  -1   93.59    4.20
  -6 -10  -1   98.49    5.40
  10 -16   1   92.59    5.20
   6  10   1  102.09    5.40
 -16   6   1  111.59    5.20
  10 -16   1   95.29    4.60
  10 -16   1  112.59    6.00
 -16   6   1  107.39    5.80
 -10  17  -1    7.40    2.30
  -7 -10  -1    4.90    2.40
  -7 -10  -1    2.80    2.50
 -10  17  -1    3.70    1.70
  -7 -10  -1    3.20    2.50
  17  -7  -1    2.90    2.50
  10 -17   1    2.70    2.20
 -17   7   1    8.50    2.80
  10 -17   1    6.40    1.60
  10 -17   1    7.20    2.60
 -17   7   1    4.40    2.00
   7  10   1    3.70    2.30
  -8 -10  -1   64.59    4.80
  18  -8  -1   63.79    4.90
  -8 -10  -1   63.29    4.70
  -8 -10  -1   56.39    4.40
 -10  18  -1   63.29    3.30
 -10  18  -1   60.39    4.50
  10 -18   1   53.59    4.00
   8  10   1   60.89    4.40
 -18   8   1   58.89    4.50
  10 -18   1   62.09    3.70
 -18   8   1   60.39    4.00
  10 -18   1   54.49    4.40
  -9 -10  -1    1.50    2.40
  -9 -10  -1   -0.30    2.40
  19  -9  -1   -1.30    2.70
 -10  19  -1    0.20    2.20
   9  10   1   -0.20    2.00
 -19   9   1   -2.60    2.60
  10 -19   1    3.10    3.30
 -19   9   1    0.50    1.90
  10 -19   1    1.60    1.50
  10 -19   1   -0.80    2.30
 -10 -10  -1   12.70    2.90
  20 -10  -1    4.00    2.80
 -10 -10  -1    6.20    2.70
 -10  20  -1    7.80    2.50
 -20  10   1    3.60    2.10
 -20  10   1   10.10    3.20
  10  10   1    6.10    2.40
  10 -20   1    1.60    2.70
  10 -20   1    6.90    1.80
 -10  21  -1    8.20    2.50
 -11 -10  -1    7.90    2.70
 -11 -10  -1    7.60    2.80
  21 -11  -1    9.50    3.40
 -21  11   1    7.70    2.20
  11  10   1   12.60    3.00
 -21  11   1    5.60    2.80
  10 -21   1    7.70    2.00
  10 -21   1    6.10    2.50
  -9  20  -1   12.90    2.40
 -11  -9  -1    7.80    2.80
  20 -11  -1   14.00    3.60
 -11  -9  -1   13.20    2.80
 -20  11   1    6.10    2.70
  11   9   1    8.90    2.90
 -20  11   1    8.30    2.10
   9 -20   1   10.40    2.70
   9 -20   1   11.90    2.10
 -11  -8  -1   52.79    4.50
  -8  19  -1   44.10    3.90
  19 -11  -1   44.10    4.70
 -11  -8  -1   46.20    4.30
   8 -19   1   40.50    4.10
  11   8   1   44.00    4.00
   8 -19   1   35.80    3.50
   8 -19   1   42.70    3.60
 -19  11   1   34.30    3.30
 -19  11   1   35.70    4.10
  -7  18  -1   50.69    4.10
  18 -11  -1   52.19    5.10
 -11  -7  -1   48.10    4.10
  11   7   1   53.29    4.60
 -18  11   1   43.40    3.30
   7 -18   1   40.50    3.60
   7 -18   1   41.10    3.60
   7 -18   1   45.30    4.30
 -18  11   1   44.20    4.70
  17 -11  -1   67.09    5.90
  -6  17  -1   69.49    5.90
 -11  -6  -1   66.49    4.70
 -11  -6  -1   60.19    4.90
 -11  -6  -1   67.29    4.70
  11   6   1   64.29    5.10
 -17  11   1   70.19    3.80
   6 -17   1   68.99    4.50
   6 -17   1   65.59    4.40
 -17  11   1   71.29    5.10
   6 -17   1   58.39    4.40
  -5  16  -1   36.10    3.40
 -11  -5  -1   32.20    3.60
  16 -11  -1   34.00    3.80
 -11  -5  -1   33.10    3.50
 -16  11   1   35.30    3.60
 -16  11   1   36.40    3.00
   5 -16   1   32.10    3.20
   5 -16   1   37.40    3.70
  11   5   1   35.50    4.00
   5 -16   1   29.30    3.10
 -16  11   1   36.10    2.80
  -4  15  -1   70.99    5.50
  15 -11  -1   80.19    5.20
  15 -11  -1   73.59    4.20
 -11  -4  -1   68.99    4.50
 -11  -4  -1   72.59    4.70
 -11  -4  -1   70.79    4.80
  11   4   1   74.29    4.70
 -15  11   1   85.09    5.10
   4 -15   1   75.49    4.30
   4 -15   1   80.99    4.30
 -15  11   1   76.39    4.10
 -15  11   1   75.39    3.80
   4 -15   1   78.79    4.40
  14 -11  -1   19.50    2.40
  14 -11  -1   16.60    2.60
  -3  14  -1   14.40    2.10
 -11  -3  -1   17.30    2.40
 -11  -3  -1   14.40    2.50
   3 -14   1   20.40    2.40
   3 -14   1   19.80    2.30
 -14  11   1   15.90    2.00
   3 -14   1   15.30    2.20
 -14  11   1   14.50    2.40
  11   3   1   21.10    2.90
  -2  13  -1   91.69    4.70
 -11  -2  -1   95.29    5.30
 -11  -2  -1   92.69    4.70
  13 -11  -1   97.19    5.40
 -11  -2  -1   97.09    5.10
   2 -13   1   95.39    4.70
 -13  11   1   93.29    4.30
 -13  11   1   93.39    4.90
  11   2   1   96.79    5.10
   2 -13   1   97.89    4.90
 -13  11   1   95.99    4.20
   2 -13   1   88.89    4.70
 -11  -1  -1   37.80    2.90
 -11  -1  -1   39.30    3.10
  12 -11  -1   39.10    3.20
  -1  12  -1   39.20    3.00
  12 -11  -1   40.30    3.00
  11   1   1   38.70    3.20
   1 -12   1   39.90    3.10
   1 -12   1   43.00    3.00
 -12  11   1   41.40    2.40
 -12  11   1   43.80    3.40
 -12  11   1   42.00    2.50
   1 -12   1   43.80    3.10
  11   1   1   42.20    3.60
 -11   0  -1   75.39    4.30
 -11   0  -1   72.29    5.30
 -11   0  -1   70.59    4.80
  11 -11  -1   77.89    4.00
   0  11  -1   78.99    3.80
  11 -11  -1   75.29    4.20
  11   0   1   74.59    4.00
   0 -11   1   78.19    3.90
 -11  11   1   76.49    3.50
 -11  11   1   81.69    3.80
   0 -11   1   78.39    3.90
   0 -11   1   71.89    3.80
 -11  11   1   74.39    4.00
  11   0   1   79.49    4.50
 -11  11   1   75.99    4.20
   1  10  -1   78.19    3.90
 -11   1  -1   78.69    4.10
  10 -11  -1   78.79    4.00
  10 -11  -1   84.49    4.20
  10 -11  -1   88.19    4.60
 -11   1  -1   81.99    4.20
 -11   1  -1   75.59    4.40
  -1 -10   1   82.59    4.00
  11  -1   1   79.09    4.50
  -1 -10   1   82.89    4.20
  11  -1   1   83.99    4.40
 -10  11   1   79.89    4.00
 -10  11   1   84.69    4.30
  -1 -10   1   84.19    4.10
 -10  11   1   83.39    3.60
 -11   2  -1   67.39    3.70
   9 -11  -1   65.09    3.50
 -11   2  -1   64.69    3.40
 -11   2  -1   68.59    3.90
   9 -11  -1   64.99    3.40
   2   9  -1   66.19    3.60
   9 -11  -1   75.39    4.00
  -9  11   1   64.69    3.00
  -2  -9   1   64.49    3.50
  11  -2   1   63.69    3.60
  -9  11   1   66.69    3.70
  11  -2   1   69.69    4.10
  -2  -9   1   66.49    3.60
  -2  -9   1   67.79    3.50
  -9  11   1   67.89    4.10
 -11   3  -1   16.60    2.00
   8 -11  -1   16.00    1.80
   3   8  -1   21.00    2.10
 -11   3  -1   13.90    2.00
   8 -11  -1   18.10    2.10
   3   8  -1   15.70    1.90
 -11   3  -1   17.70    1.80
  11  -3   1   15.70    2.20
  -8  11   1   14.50    1.90
  -8  11   1   14.20    1.50
  11  -3   1   14.80    1.90
  -8  11   1   12.70    1.70
  -3  -8   1   15.20    1.80
  11  -3   1   14.80    1.80
  -3  -8   1   15.30    2.00
  -3  -8   1   14.90    2.10
   7 -11  -1   52.19    3.30
 -11   4  -1   44.60    3.80
   7 -11  -1   43.50    2.80
 -11   4  -1   47.50    3.10
 -11   4  -1   44.30    2.70
   4   7  -1   47.40    3.20
   7 -11  -1   46.40    2.70
   4   7  -1   46.00    2.90
  -4  -7   1   53.59    3.00
  -7  11   1   48.80    2.40
  -4  -7   1   55.39    3.30
  -7  11   1   48.30    2.90
  -4  -7   1   48.10    3.20
  11  -4   1   51.19    3.00
  11  -4   1   49.90    2.90
  11  -4   1   53.49    3.40
   6 -11  -1   87.29    4.20
 -11   5  -1   84.09    3.70
   5   6  -1   85.59    4.30
   6 -11  -1   80.69    3.80
   5   6  -1   83.09    4.10
 -11   5  -1   81.49    4.30
   6 -11  -1   85.19    4.00
  -6  11   1   78.49    3.50
  11  -5   1   89.89    4.60
  -6  11   1   82.99    4.00
  -6  11   1   85.49    4.60
  -5  -6   1   78.79    4.10
  -5  -6   1   86.89    4.20
  11  -5   1   80.99    4.00
  -5  -6   1   87.69    4.10
   6   5  -1    7.00    1.80
   5 -11  -1    9.30    1.50
 -11   6  -1    9.10    1.80
 -11   6  -1    7.40    1.30
   5 -11  -1    7.90    1.40
 -11   6  -1    9.50    1.50
   5 -11  -1   10.00    1.60
   6   5  -1   10.40    1.60
  -5  11   1   11.30    1.30
  -6  -5   1    6.90    1.70
  -6  -5   1    8.20    1.80
  -6  -5   1    8.90    1.80
  11  -6   1    8.00    1.80
  11  -6   1    9.20    1.70
  11  -6   1   10.00    1.40
  -5  11   1    9.20    1.60
  -5  11   1    8.10    1.50
   4 -11  -1    8.10    1.50
 -11   7  -1    6.10    1.80
   4 -11  -1   10.50    1.70
 -11   7  -1    9.90    1.30
   7   4  -1    8.10    1.70
   4 -11  -1    8.10    1.50
   7   4  -1    6.00    1.60
 -11   7  -1    9.10    1.40
 -11   7  -1    4.50    1.50
  11  -7   1    8.10    1.50
  11  -7   1    8.00    1.80
  -7  -4   1    9.10    1.70
  -7  -4   1    7.30    1.60
  -7  -4   1    9.20    1.80
  11  -7   1    6.40    1.30
  -4  11   1   10.70    1.70
  -4  11   1   10.60    1.50
   8   3  -1   15.30    2.40
   3 -11  -1   14.90    1.90
   3 -11  -1   16.80    2.00
 -11   8  -1   13.00    1.90
   8   3  -1   14.00    1.80
 -11   8  -1   15.60    1.90
 -11   8  -1   15.50    1.60
   3 -11  -1   14.90    1.90
  -3  11   1   16.30    1.90
  -8  -3   1   19.30    2.10
  11  -8   1   15.80    2.00
  -3  11   1   15.10    1.80
  11  -8   1   21.40    2.50
  -8  -3   1   16.90    2.10
  -8  -3   1   16.40    2.20
  11  -8   1   14.00    1.50
  -3  11   1   18.50    2.30
   2 -11  -1   15.20    2.00
 -11   9  -1   12.80    1.90
 -11   9  -1   12.40    1.80
 -11   9  -1   13.30    1.50
   2 -11  -1   12.60    1.80
   2 -11  -1   12.00    1.70
   9   2  -1   14.20    2.00
   9   2  -1   12.70    1.90
 -11   9  -1   15.00    1.70
  -2  11   1   13.20    1.90
  -9  -2   1   16.40    2.20
  -2  11   1   12.70    2.00
  11  -9   1   14.80    2.10
  -9  -2   1   14.90    2.00
  -2  11   1   16.30    1.90
  11  -9   1   13.60    1.90
  -9  -2   1   15.20    1.90
 -11  10  -1   51.29    2.70
  10   1  -1   51.59    3.40
   1 -11  -1   49.10    3.30
 -11  10  -1   49.60    2.50
   1 -11  -1   52.59    3.10
 -11  10  -1   50.19    3.50
   1 -11  -1   48.90    3.30
  10   1  -1   49.10    4.90
 -11  10  -1   53.79    3.40
 -10  -1   1   49.80    3.50
 -10  -1   1   49.30    3.90
 -10  -1   1   52.29    3.30
  11 -10   1   51.19    3.20
  -1  11   1   52.79    4.50
  11 -10   1   54.39    3.70
  -1  11   1   45.80    4.50
  11   0  -1    3.40    1.70
 -11  11  -1    2.50    0.90
   0 -11  -1    2.00    1.60
  11   0  -1    3.20    1.50
 -11  11  -1    1.10    1.40
   0 -11  -1    2.90    1.60
 -11  11  -1    3.40    0.90
   0 -11  -1   -0.10    1.40
  11 -11   1    4.50    1.90
 -11   0   1    2.30    1.60
 -11   0   1    3.60    2.60
 -11   0   1   -0.30    1.50
   0  11   1    2.00    1.60
  11 -11   1    2.60    1.30
 -11  12  -1   38.30    2.00
 -11  12  -1   38.70    3.20
 -11  12  -1   40.10    2.10
  12  -1  -1   44.00    3.30
  -1 -11  -1   40.50    3.10
  12  -1  -1   36.60    3.60
  -1 -11  -1   34.60    3.50
  11 -12   1   34.40    2.60
  11 -12   1   36.00    2.20
 -12   1   1   38.60    3.10
 -12   1   1   34.10    3.10
  11 -12   1   38.00    3.40
 -12   1   1   36.40    3.00
   1  11   1   32.40    3.20
  -2 -11  -1    8.20    2.00
  -2 -11  -1    7.70    2.10
 -11  13  -1   11.00    1.30
 -11  13  -1    7.60    1.90
  13  -2  -1    9.30    2.40
  -2 -11  -1    8.30    1.90
  11 -13   1   11.30    1.30
 -13   2   1   10.20    2.40
 -13   2   1   10.30    2.00
   2  11   1   12.60    2.40
  11 -13   1   10.50    1.70
 -13   2   1    6.20    2.00
  11 -13   1    7.60    2.00
 -11  14  -1   64.79    5.90
 -11  14  -1   64.09    3.70
 -11  14  -1   63.09    2.90
  14  -3  -1   65.49    4.40
  -3 -11  -1   64.09    4.00
  -3 -11  -1   64.59    4.20
  -3 -11  -1   62.89    4.00
  11 -14   1   68.39    3.70
 -14   3   1   66.99    4.50
  11 -14   1   61.59    4.80
 -14   3   1   71.09    4.40
 -14   3   1   68.99    3.80
   3  11   1   66.79    4.10
  -4 -11  -1   35.70    3.50
  -4 -11  -1   32.30    3.40
 -11  15  -1   32.40    3.80
  -4 -11  -1   34.50    3.70
  15  -4  -1   34.00    3.60
 -11  15  -1   29.90    2.00
  11 -15   1   39.20    3.90
   4  11   1   28.10    3.00
 -15   4   1   33.70    3.30
  11 -15   1   31.90    2.90
 -15   4   1   33.30    3.40
 -15   4   1   30.50    3.40
 -11  16  -1  168.88    7.60
 -11  16  -1  155.18    6.20
  -5 -11  -1  174.08    7.60
  -5 -11  -1  172.28    7.70
  16  -5  -1  163.48    7.90
 -16   5   1  162.48    7.70
   5  11   1  160.88    7.40
  11 -16   1  176.68    8.10
  11 -16   1  159.58    7.20
  11 -16   1  155.38    6.60
 -16   5   1  177.78    7.30
  -6 -11  -1   11.20    2.60
 -11  17  -1    6.80    2.20
  -6 -11  -1    5.30    2.30
  -6 -11  -1    8.30    2.60
  17  -6  -1    6.50    2.70
 -11  17  -1    5.00    1.30
  11 -17   1    8.20    2.60
  11 -17   1    5.70    1.50
 -17   6   1    6.00    2.20
   6  11   1    1.50    2.50
 -17   6   1    8.20    2.60
  11 -17   1    4.90    2.00
  -7 -11  -1   59.39    4.40
 -11  18  -1   61.79    4.20
  -7 -11  -1   57.79    4.30
  18  -7  -1   63.39    5.00
  -7 -11  -1   70.89    4.80
  11 -18   1   53.59    4.00
  11 -18   1   59.89    4.90
   7  11   1   51.69    4.30
  11 -18   1   63.89    3.50
 -18   7   1   65.19    4.20
  19  -8  -1    3.20    2.90
 -11  19  -1    3.50    1.30
  -8 -11  -1    5.50    2.60
 -11  19  -1    7.40    2.50
  -8 -11  -1    8.10    2.70
  -8 -11  -1    7.10    3.00
   8  11   1    4.30    2.20
  11 -19   1    5.80    1.50
 -19   8   1    4.70    2.20
 -19   8   1    3.80    2.50
  11 -19   1    6.20    2.50
  20  -9  -1    1.90    3.00
 -11  20  -1    1.40    2.50
  -9 -11  -1   -0.60    2.50
  -9 -11  -1    1.90    2.40
  11 -20   1   -0.50    2.60
  11 -20   1    2.90    1.50
 -20   9   1   -0.60    2.10
   9  11   1    0.20    2.20
 -20   9   1    0.60    2.50
 -10 -11  -1    6.90    3.00
 -10 -11  -1    5.10    2.80
 -11  21  -1    7.90    2.70
  21 -10  -1   14.80    3.40
 -21  10   1    4.90    2.90
  11 -21   1    2.10    2.80
  11 -21   1    6.70    1.80
  10  11   1    8.10    2.60
 -21  10   1    3.80    2.20
 -11  22  -1   20.00    3.10
  22 -11  -1   12.70    3.50
 -11 -11  -1   15.70    3.30
 -11 -11  -1   22.00    3.30
  11 -22   1   15.60    3.20
  11 -22   1   19.50    2.80
 -22  11   1   14.40    2.70
 -22  11   1   12.80    3.80
  11  11   1   24.10    3.60
  22 -12  -1   21.30    3.80
 -12 -10  -1   26.00    3.60
 -12 -10  -1   22.00    3.50
 -10  22  -1   17.00    3.20
  10 -22   1   13.10    3.40
 -22  12   1   23.40    4.00
  12  10   1   22.90    3.30
 -22  12   1   16.80    2.80
  10 -22   1   24.10    2.90
  -9  21  -1    1.20    2.50
 -12  -9  -1    3.30    2.70
 -12  -9  -1   -3.60    2.90
  21 -12  -1    1.40    3.00
 -21  12   1   -3.10    2.80
   9 -21   1    1.70    1.80
  12   9   1    1.20    2.40
   9 -21   1   -2.00    2.60
  20 -12  -1    9.10    3.20
  -8  20  -1    7.40    2.20
 -12  -8  -1   10.90    2.90
   8 -20   1   16.50    2.50
   8 -20   1   11.20    2.60
 -20  12   1   10.80    3.20
  12   8   1   10.60    3.10
 -20  12   1   10.20    2.10
  19 -12  -1    7.00    3.10
 -12  -7  -1    5.90    2.70
  -7  19  -1    2.60    2.30
 -12  -7  -1    5.70    2.50
 -19  12   1    0.90    2.00
   7 -19   1    7.10    2.60
   7 -19   1    1.60    1.90
  12   7   1    1.50    2.40
 -19  12   1    1.10    2.70
   7 -19   1    4.00    2.40
  -6  18  -1   48.80    4.00
 -12  -6  -1   43.10    5.00
 -12  -6  -1   47.30    4.50
  18 -12  -1   45.90    4.50
 -18  12   1   42.30    4.20
   6 -18   1   53.49    4.30
   6 -18   1   39.20    3.90
   6 -18   1   36.30    3.70
  12   6   1   52.19    4.60
 -18  12   1   43.00    3.30
  -5  17  -1   32.30    5.00
  17 -12  -1   41.80    4.90
 -12  -5  -1   28.60    3.80
 -12  -5  -1   33.40    3.80
  12   5   1   34.10    3.80
   5 -17   1   28.60    3.50
   5 -17   1   29.60    3.40
   5 -17   1   35.80    3.60
 -17  12   1   29.90    3.70
 -17  12   1   34.10    2.70
 -12  -4  -1   40.80    4.30
  16 -12  -1   43.90    4.20
 -12  -4  -1   39.10    3.80
  -4  16  -1   44.00    3.70
   4 -16   1   41.60    3.60
   4 -16   1   47.50    3.60
 -16  12   1   41.60    2.90
 -16  12   1   39.50    3.70
 -16  12   1   45.10    3.10
  12   4   1   43.70    4.30
   4 -16   1   40.70    3.70
  15 -12  -1   21.00    3.40
  -3  15  -1   21.70    3.20
 -12  -3  -1   20.80    2.80
  15 -12  -1   19.60    2.40
 -12  -3  -1   20.20    2.80
 -12  -3  -1   18.80    2.70
   3 -15   1   19.70    2.60
  12   3   1   21.30    2.90
 -15  12   1   20.00    2.30
 -15  12   1   20.10    2.30
 -15  12   1   25.80    3.10
   3 -15   1   23.30    3.30
   3 -15   1   26.60    3.30
  14 -12  -1   34.80    3.60
 -12  -2  -1   27.00    3.10
 -12  -2  -1   29.10    3.50
 -12  -2  -1   31.30    3.60
  -2  14  -1   32.10    3.70
  14 -12  -1   26.70    2.80
   2 -14   1   34.10    3.20
 -14  12   1   27.60    2.40
 -14  12   1   31.00    2.40
 -14  12   1   30.10    3.20
   2 -14   1   29.50    2.90
  12   2   1   29.50    3.40
  -1  13  -1   53.89    3.50
 -12  -1  -1   54.59    4.20
  13 -12  -1   58.19    4.30
 -12  -1  -1   56.29    4.10
 -12  -1  -1   54.99    3.50
 -13  12   1   49.00    2.90
   1 -13   1   53.29    3.40
   1 -13   1   52.49    4.30
  12   1   1   51.49    3.80
 -13  12   1   50.89    2.90
 -13  12   1   50.49    3.60
  12 -12  -1   10.60    2.10
 -12   0  -1   10.50    2.10
 -12   0  -1   11.10    1.90
   0  12  -1   10.30    1.80
  12 -12  -1   10.50    1.90
 -12   0  -1    9.40    2.00
 -12  12   1    9.90    1.40
  12   0   1    7.60    1.90
   0 -12   1    5.80    1.90
  12   0   1    9.90    2.50
 -12  12   1   10.60    2.00
   0 -12   1    6.60    3.40
   0 -12   1    8.70    2.00
 -12  12   1   11.00    1.40
   1  11  -1   41.60    3.10
 -12   1  -1   46.10    4.70
 -12   1  -1   40.40    3.30
  11 -12  -1   42.70    3.70
 -12   1  -1   38.70    3.10
  11 -12  -1   41.90    3.00
  11 -12  -1   39.10    3.20
  -1 -11   1   37.10    4.60
  12  -1   1   48.10    3.70
 -11  12   1   40.40    3.30
  -1 -11   1   38.90    3.10
 -11  12   1   42.40    2.30
 -11  12   1   42.40    2.50
  12  -1   1   43.00    3.00
 -12   2  -1   -0.10    1.70
  10 -12  -1   -0.40    1.60
 -12   2  -1   -0.80    1.20
   2  10  -1    0.00    1.50
 -12   2  -1   -0.20    1.40
  10 -12  -1    0.40    1.30
  -2 -10   1   -5.20    2.40
  -2 -10   1   -1.20    1.40
  12  -2   1   -1.50    1.80
  -2 -10   1   -0.80    1.30
 -10  12   1    0.10    1.10
 -10  12   1    0.50    1.40
 -10  12   1    1.50    0.90
  12  -2   1   -2.80    1.40
   9 -12  -1    6.30    1.50
   9 -12  -1    8.70    1.80
   9 -12  -1    9.40    1.50
 -12   3  -1   10.40    1.80
   3   9  -1   10.10    1.80
 -12   3  -1    9.30    1.90
 -12   3  -1    7.00    1.60
  -9  12   1   11.00    1.40
  -3  -9   1    6.20    2.80
  -9  12   1   13.70    2.90
  -3  -9   1   11.10    1.70
  -3  -9   1   11.10    1.70
  12  -3   1    7.00    1.90
  -9  12   1    8.40    1.60
   8 -12  -1   53.19    3.20
 -12   4  -1   41.30    2.70
   8 -12  -1   47.10    2.80
 -12   4  -1   44.20    3.10
   8 -12  -1   41.60    2.70
 -12   4  -1   46.00    3.20
   4   8  -1   52.09    3.20
  12  -4   1   43.30    3.20
  -8  12   1   45.00    3.00
  12  -4   1   41.80    3.30
  -4  -8   1   41.60    4.50
  -4  -8   1   45.40    3.20
  -8  12   1   46.90    2.80
  -4  -8   1   51.79    3.00
  12  -4   1   43.70    2.90
   7 -12  -1   73.69    3.80
   7 -12  -1   70.39    3.70
 -12   5  -1   69.99    4.10
   5   7  -1   69.79    3.70
   7 -12  -1   66.69    3.50
 -12   5  -1   62.39    3.40
 -12   5  -1   68.89    3.90
  -7  12   1   69.59    3.70
  12  -5   1   77.09    3.90
  -7  12   1   63.09    3.10
  12  -5   1   83.19    4.50
  12  -5   1   62.09    3.50
  -7  12   1   71.99    3.60
  -5  -7   1   77.59    3.90
  -5  -7   1   69.69    3.80
 -12   6  -1  115.29    5.20
   6 -12  -1  111.19    5.00
   6   6  -1  115.19    5.30
 -12   6  -1  106.39    5.20
   6 -12  -1  108.99    4.90
   6 -12  -1  111.49    5.00
 -12   6  -1  109.49    5.10
 -12   6  -1  113.49    4.70
  -6  -6   1  103.99    5.10
  -6  -6   1  126.59    6.70
  12  -6   1  108.89    5.40
  -6  12   1  102.29    4.50
  -6  -6   1  113.29    5.10
  -6  12   1  108.39    5.40
  12  -6   1  103.49    5.00
  -6  12   1  109.49    5.00
  12  -6   1  100.39    4.70
   5 -12  -1  175.58    6.70
 -12   7  -1  157.18    6.80
   7   5  -1  166.48    7.00
   7   5  -1  160.98    7.20
   5 -12  -1  156.18    6.40
 -12   7  -1  159.48    6.70
 -12   7  -1  167.28    6.90
 -12   7  -1  163.48    6.20
   5 -12  -1  159.78    6.70
  12  -7   1  159.58    6.70
  -7  -5   1  158.08    6.80
  -5  12   1  146.29    6.10
  12  -7   1  147.59    6.20
  -5  12   1  157.38    7.60
  12  -7   1  163.58    7.10
  -7  -5   1  155.58    7.10
  -7  -5   1  156.78    6.60
  -5  12   1  160.38    6.70
 -12   8  -1  118.89    4.70
   8   4  -1  117.69    5.90
 -12   8  -1  118.69    5.50
   4 -12  -1  123.49    5.40
 -12   8  -1  118.29    5.10
   8   4  -1  111.59    6.00
 -12   8  -1  115.69    5.40
   4 -12  -1  121.09    5.40
   4 -12  -1  124.79    5.30
  -4  12   1  115.79    4.90
  12  -8   1  119.89    5.30
  -8  -4   1  114.59    5.30
  12  -8   1  112.79    4.90
  -8  -4   1  122.79    5.30
  -8  -4   1  111.69    5.50
  -4  12   1  120.99    6.60
  12  -8   1  120.09    5.80
 -12   9  -1   89.99    5.40
   3 -12  -1   86.09    4.30
   3 -12  -1   82.79    4.30
 -12   9  -1   88.39    4.00
   3 -12  -1   93.19    4.40
 -12   9  -1   95.09    3.80
   9   3  -1   92.49    4.80
 -12   9  -1   82.49    4.60
  -3  12   1   87.99    4.40
  -9  -3   1   83.59    4.60
  -9  -3   1   87.99    4.60
  12  -9   1   92.19    4.80
  -3  12   1   92.29    4.90
  -9  -3   1   92.79    4.60
  12  -9   1   86.89    4.30
 -12  10  -1  120.19    6.30
   2 -12  -1  117.89    5.40
 -12  10  -1  112.09    4.80
  10   2  -1  119.29    5.90
 -12  10  -1  113.79    4.90
   2 -12  -1  118.49    5.20
   2 -12  -1  116.49    5.30
  12 -10   1  118.89    5.90
 -10  -2   1  119.79    5.30
  12 -10   1  114.29    5.30
 -10  -2   1  118.09    5.40
  -2  12   1  118.59    5.40
 -10  -2   1  114.99    5.70
  11   1  -1   32.00    3.40
   1 -12  -1   34.70    2.80
 -12  11  -1   38.30    2.20
 -12  11  -1   35.30    2.90
   1 -12  -1   41.30    3.10
   1 -12  -1   37.10    2.80
 -12  11  -1   34.50    3.70
 -11  -1   1   35.10    3.20
 -11  -1   1   40.00    3.10
  12 -11   1   40.30    2.70
 -11  -1   1   38.10    3.10
  12 -11   1   42.40    3.60
  -1  12   1   42.80    3.10
 -12  12  -1   92.09    3.80
 -12  12  -1   93.39    5.50
   0 -12  -1   86.39    4.50
   0 -12  -1   96.29    5.10
  12   0  -1   92.79    5.00
   0 -12  -1   91.09    4.60
  12 -12   1   93.09    5.10
  12 -12   1   87.99    4.40
 -12   0   1   91.39    5.00
 -12   0   1   85.19    4.50
 -12   0   1   87.99    4.70
  13  -1  -1    0.90    2.10
  -1 -12  -1    3.50    1.70
  -1 -12  -1    1.30    1.60
 -12  13  -1   -0.40    1.60
 -12  13  -1    2.30    0.80
  -1 -12  -1   -0.70    1.70
  12 -13   1   -0.20    1.90
  12 -13   1    4.70    1.70
 -13   1   1    0.70    2.00
   1  12   1    1.00    1.80
 -13   1   1   -3.60    1.50
 -13   1   1   -0.60    1.90
 -12  14  -1   69.19    3.20
  -2 -12  -1   74.59    4.60
  -2 -12  -1   80.49    4.80
  14  -2  -1   75.49    5.10
  -2 -12  -1   72.79    6.00
 -12  14  -1   81.09    4.40
   2  12   1   81.49    4.40
  12 -14   1   79.99    4.60
 -14   2   1   72.99    4.60
  12 -14   1   82.49    7.00
 -14   2   1   84.29    4.70
  12 -14   1   74.89    4.20
 -14   2   1   81.29    4.30
 -12  15  -1    4.60    1.00
 -12  15  -1    1.30    2.20
  -3 -12  -1    6.00    2.20
  -3 -12  -1    4.20    2.30
  15  -3  -1    1.90    2.30
  -3 -12  -1    3.50    2.30
 -12  15  -1    6.60    1.50
  12 -15   1    2.70    1.80
 -15   3   1    6.40    2.10
 -15   3   1    3.70    2.50
  12 -15   1    1.90    2.20
   3  12   1    3.50    2.30
 -15   3   1    6.20    2.20
 -12  16  -1   50.49    2.70
  -4 -12  -1   63.09    4.70
 -12  16  -1   62.49    4.50
  -4 -12  -1   57.29    4.40
  16  -4  -1   60.09    4.70
 -16   4   1   59.89    4.80
  12 -16   1   50.99    4.00
   4  12   1   53.89    4.10
  12 -16   1   61.09    4.90
  -5 -12  -1    5.60    2.80
  17  -5  -1    4.70    2.90
 -12  17  -1    9.50    2.50
  -5 -12  -1    9.70    2.50
 -12  17  -1    4.90    1.20
  -5 -12  -1    6.90    2.40
 -17   5   1    5.60    2.20
  12 -17   1   10.70    2.60
  12 -17   1    7.70    2.10
 -17   5   1    8.00    3.20
   5  12   1   13.00    2.80
  12 -17   1    7.20    1.50
 -12  18  -1   57.59    2.90
  -6 -12  -1   56.19    4.70
  -6 -12  -1   53.39    4.50
 -12  18  -1   54.49    4.50
  -6 -12  -1   53.49    4.50
  18  -6  -1   65.19    5.50
 -18   6   1   55.69    4.90
 -18   6   1   54.49    4.10
   6  12   1   60.79    4.70
  12 -18   1   49.50    4.40
  12 -18   1   54.59    3.20
  -7 -12  -1    2.30    2.10
 -12  19  -1   -1.70    2.00
  -7 -12  -1   -0.30    2.20
  19  -7  -1   -3.90    4.10
  12 -19   1   -2.90    2.30
 -19   7   1   -1.90    1.90
  12 -19   1    0.00    1.20
   7  12   1   -1.80    2.40
  12 -19   1   -2.20    1.90
 -19   7   1   -5.00    2.50
  20  -8  -1    8.80    3.40
  -8 -12  -1   13.40    2.80
 -12  20  -1    8.20    2.70
 -12  20  -1    7.90    1.80
  -8 -12  -1    6.20    3.00
   8  12   1   11.90    2.70
 -20   8   1    6.00    2.30
  12 -20   1    3.80    2.80
  12 -20   1    9.60    1.60
 -20   8   1    7.60    3.20
  -9 -12  -1   -2.40    2.80
  21  -9  -1    0.60    3.10
  -9 -12  -1    3.80    2.50
 -12  21  -1   -1.70    2.50
   9  12   1    2.10    2.30
 -21   9   1    1.60    2.90
  12 -21   1    1.20    1.40
  12 -21   1   -6.00    2.50
 -21   9   1   -3.50    2.10
 -12  22  -1   18.90    3.40
 -10 -12  -1   15.20    3.30
 -10 -12  -1   11.30    3.10
  22 -10  -1   17.60    4.10
 -22  10   1    7.40    3.20
  12 -22   1   20.30    2.40
 -22  10   1   11.90    2.60
  12 -22   1   17.80    3.50
  10  12   1   13.30    3.10
  22 -13  -1    7.60    3.20
 -13  -9  -1   10.30    3.20
  -9  22  -1    9.50    3.00
 -13  -9  -1   14.20    3.30
 -22  13   1    7.20    3.40
   9 -22   1   10.80    2.20
  13   9   1   15.30    3.10
   9 -22   1    8.50    3.20
 -22  13   1    6.70    2.10
  21 -13  -1    0.60    2.80
 -13  -8  -1    1.20    2.70
  -8  21  -1    1.80    2.10
  13   8   1    2.10    2.80
 -21  13   1    0.80    1.90
   8 -21   1    6.70    2.20
   8 -21   1    4.30    3.10
 -21  13   1    2.60    3.10
  20 -13  -1    1.20    3.00
  -7  20  -1    4.60    2.40
 -13  -7  -1    7.40    2.50
 -13  -7  -1    3.70    2.70
 -20  13   1    3.30    3.20
  13   7   1    5.80    3.00
   7 -20   1    7.70    2.20
   7 -20   1    2.60    2.60
 -13  -6  -1   23.70    3.40
  -6  19  -1   15.10    2.50
 -13  -6  -1   16.80    3.20
  19 -13  -1   22.30    3.60
   6 -19   1   18.00    2.80
 -19  13   1   18.80    2.20
   6 -19   1   19.30    2.80
  13   6   1   22.90    3.40
   6 -19   1   15.00    2.60
 -19  13   1   19.70    3.10
 -13  -5  -1   16.00    2.90
  18 -13  -1   15.00    3.40
  -5  18  -1   18.10    2.60
   5 -18   1   16.90    2.70
   5 -18   1   15.70    2.40
  13   5   1   18.70    3.10
 -18  13   1   14.70    3.20
 -18  13   1   13.70    1.90
   5 -18   1   11.20    2.60
  -4  17  -1   48.30    4.90
 -13  -4  -1   44.50    4.10
 -13  -4  -1   38.30    4.00
  17 -13  -1   52.09    5.10
 -17  13   1   51.89    3.40
   4 -17   1   48.50    4.20
   4 -17   1   48.90    3.90
 -17  13   1   53.79    3.20
 -17  13   1   50.79    4.60
   4 -17   1   41.30    4.00
  13   4   1   48.60    4.30
  -3  16  -1   10.90    2.90
 -13  -3  -1   13.80    2.60
  16 -13  -1   13.50    3.70
 -13  -3  -1   11.20    3.30
 -16  13   1   14.90    1.80
 -16  13   1   18.40    2.20
   3 -16   1   17.10    2.70
   3 -16   1   13.60    2.60
 -16  13   1   16.70    3.00
  13   3   1   16.80    3.20
   3 -16   1   15.00    2.60
 -13  -2  -1   55.59    4.20
 -13  -2  -1   48.30    4.40
  15 -13  -1   47.50    4.40
  15 -13  -1   47.20    3.60
 -13  -2  -1   50.59    4.40
  -2  15  -1   53.09    3.90
   2 -15   1   54.59    3.80
 -15  13   1   52.39    4.00
  13   2   1   54.29    4.20
   2 -15   1   50.49    4.00
 -15  13   1   51.39    3.10
   2 -15   1   44.40    4.00
  14 -13  -1   19.30    2.90
 -13  -1  -1   22.90    3.00
 -13  -1  -1   18.00    2.70
 -13  -1  -1   21.70    3.10
  -1  14  -1   22.70    3.80
  14 -13  -1   24.00    2.70
   1 -14   1   27.10    2.90
   1 -14   1   27.40    2.90
 -14  13   1   25.10    2.40
 -14  13   1   22.80    2.80
  13   1   1   24.20    3.10
   1 -14   1   20.30    2.90
 -14  13   1   25.60    2.20
  13 -13  -1  165.38    7.70
 -13   0  -1  168.18    7.10
  13 -13  -1  153.18    7.60
 -13   0  -1  162.18    7.60
   0  13  -1  160.98    8.60
 -13   0  -1  164.78    7.40
   0 -13   1  184.18    7.40
 -13  13   1  170.88    7.40
 -13  13   1  172.58    6.70
   0 -13   1  165.58    7.40
 -13  13   1  160.48    6.60
   0 -13   1  166.08    7.10
  13   0   1  171.68    7.70
 -13   1  -1   50.19    4.00
 -13   1  -1   48.30    4.00
 -13   1  -1   50.89    3.40
  12 -13  -1   48.10    3.30
  12 -13  -1   53.59    3.90
  12 -13  -1   52.19    3.10
   1  12  -1   48.90    3.40
  -1 -12   1   48.80    3.70
  -1 -12   1   53.99    3.80
 -12  13   1   56.09    2.80
 -12  13   1   53.79    3.00
 -12  13   1   54.49    3.60
  13  -1   1   56.39    4.00
 -13   2  -1   93.49    4.50
   2  11  -1   98.49    4.80
  11 -13  -1   95.79    5.30
 -13   2  -1   93.39    4.90
  11 -13  -1   94.49    4.30
 -13   2  -1  101.09    5.30
  11 -13  -1   88.69    4.50
  13  -2   1   90.79    5.00
  -2 -11   1   96.59    4.70
  13  -2   1   95.09    5.10
  -2 -11   1   98.19    4.70
  -2 -11   1   86.19    4.70
 -11  13   1   89.69    4.10
 -11  13   1   90.79    4.00
 -11  13   1   96.69    4.80
  10 -13  -1   63.29    3.60
 -13   3  -1   69.19    4.20
  10 -13  -1   71.09    4.30
 -13   3  -1   64.09    3.50
  10 -13  -1   68.19    3.50
 -13   3  -1   65.79    4.20
   3  10  -1   71.09    3.80
 -10  13   1   64.19    3.80
  13  -3   1   65.79    3.80
  -3 -10   1   64.29    3.90
  -3 -10   1   69.59    4.10
  13  -3   1   62.69    4.10
  -3 -10   1   66.89    4.00
 -10  13   1   61.79    3.00
   9 -13  -1   54.49    3.00
 -13   4  -1   60.59    3.90
   9 -13  -1   58.69    3.40
   4   9  -1   62.09    3.70
   9 -13  -1   59.49    3.60
 -13   4  -1   57.89    3.90
 -13   4  -1   48.20    3.20
  13  -4   1   52.99    3.40
  -4  -9   1   56.19    3.30
  -4  -9   1   53.39    3.40
  -4  -9   1   57.09    3.50
  -9  13   1   54.19    2.70
  13  -4   1   56.89    3.80
  -9  13   1   57.69    3.40
 -13   5  -1   29.50    2.50
   8 -13  -1   32.80    2.40
 -13   5  -1   30.30    2.80
   8 -13  -1   36.20    3.00
 -13   5  -1   36.30    2.90
   5   8  -1   30.30    2.70
   8 -13  -1   28.80    2.40
  13  -5   1   26.60    2.90
  -8  13   1   25.00    1.90
  -5  -8   1   22.50    2.70
  -5  -8   1   28.20    2.70
  -8  13   1   38.90    4.40
  -5  -8   1   30.50    2.60
 -13   6  -1   33.70    3.00
   7 -13  -1   38.90    2.80
 -13   6  -1   36.80    2.90
   7 -13  -1   42.90    2.90
 -13   6  -1   36.50    2.90
   7 -13  -1   35.80    2.60
   6   7  -1   41.70    3.60
 -13   6  -1   36.30    2.60
  -7  13   1   32.20    3.10
  -6  -7   1   37.30    2.90
  -6  -7   1   33.80    2.70
  -6  -7   1   30.60    2.90
  13  -6   1   39.20    2.80
  13  -6   1   28.50    2.50
  13  -6   1   35.40    3.20
   6 -13  -1    0.40    1.40
 -13   7  -1    2.60    1.50
 -13   7  -1    0.80    1.20
   7   6  -1    3.00    2.20
 -13   7  -1    3.40    1.30
   6 -13  -1    1.40    1.50
 -13   7  -1    1.30    1.60
  -7  -6   1    0.70    1.60
  13  -7   1    0.60    1.20
  -6  13   1   -0.60    1.00
  13  -7   1    1.50    1.80
  -7  -6   1    0.20    1.80
  13  -7   1    0.40    1.40
  -7  -6   1    3.40    1.80
  -6  13   1    1.00    1.40
   8   5  -1    6.30    1.90
 -13   8  -1    8.80    2.30
 -13   8  -1    2.00    2.00
 -13   8  -1    3.10    1.10
   5 -13  -1    1.00    1.50
 -13   8  -1    4.20    1.70
   5 -13  -1    5.50    1.70
   5 -13  -1    1.80    1.40
  -8  -5   1    3.70    1.90
  13  -8   1    3.00    1.80
  -8  -5   1    2.80    1.80
  -8  -5   1    5.30    1.70
  13  -8   1    5.10    1.60
  -5  13   1    2.30    1.20
  -5  13   1    5.90    1.60
  13  -8   1    3.00    1.40
 -13   9  -1   13.30    1.70
 -13   9  -1   11.10    2.00
   4 -13  -1   12.30    2.00
   4 -13  -1   13.20    2.00
 -13   9  -1   14.70    1.90
   4 -13  -1   12.60    1.80
  -9  -4   1   12.50    2.00
  -9  -4   1   12.70    2.00
  13  -9   1   13.30    1.90
  -9  -4   1   12.50    2.00
  13  -9   1   15.50    2.40
  -4  13   1   11.60    1.80
 -13  10  -1    9.70    1.30
 -13  10  -1   11.50    1.30
   3 -13  -1    7.30    1.70
  10   3  -1    6.50    1.90
 -13  10  -1    7.70    1.90
   3 -13  -1    8.10    1.90
   3 -13  -1    9.30    1.80
 -10  -3   1    6.50    1.90
  13 -10   1   11.70    2.30
 -10  -3   1    9.10    2.10
  13 -10   1    7.30    1.80
 -10  -3   1    8.90    1.90
  -3  13   1   11.10    2.30
  11   2  -1   11.00    2.20
 -13  11  -1    9.10    1.90
 -13  11  -1    8.90    1.30
   2 -13  -1   11.50    2.10
   2 -13  -1    7.10    1.80
   2 -13  -1    5.50    1.70
  13 -11   1    9.70    1.90
  13 -11   1   11.10    2.30
 -11  -2   1    7.60    1.90
 -11  -2   1    8.80    2.00
 -11  -2   1    8.40    2.00
   1 -13  -1    2.80    1.60
 -13  12  -1    0.20    1.70
   1 -13  -1   -2.10    1.90
  12   1  -1   -0.40    1.80
   1 -13  -1    2.00    1.80
 -13  12  -1    1.60    1.10
 -13  12  -1    2.90    1.00
 -12  -1   1    2.10    1.90
  -1  13   1   -0.10    1.60
 -12  -1   1   -1.10    2.00
  13 -12   1    2.10    1.90
  13 -12   1    1.10    1.50
 -12  -1   1    1.70    1.90
 -13  13  -1   12.50    2.40
   0 -13  -1    8.80    2.20
 -13  13  -1   13.80    1.50
   0 -13  -1   10.70    2.10
   0 -13  -1   11.00    3.00
  13   0  -1   10.50    2.50
 -13   0   1   15.10    2.60
   0  13   1   10.60    2.00
  13 -13   1   11.30    1.90
 -13   0   1   10.90    2.30
  13 -13   1   12.70    2.50
 -13   0   1   12.50    2.30
 -13  14  -1   25.80    1.90
 -13  14  -1   24.80    3.00
  14  -1  -1   35.50    3.70
  -1 -13  -1   30.10    3.40
  -1 -13  -1   30.20    3.50
  -1 -13  -1   26.30    3.20
  13 -14   1   26.70    2.80
 -14   1   1   36.30    3.60
 -14   1   1   24.90    3.00
 -14   1   1   29.40    3.60
  13 -14   1   25.30    3.10
   1  13   1   26.80    3.30
 -13  15  -1   33.40    3.70
  15  -2  -1   35.00    3.90
  -2 -13  -1   34.20    3.50
  -2 -13  -1   31.90    3.60
 -13  15  -1   31.30    2.00
  13 -15   1   28.20    3.00
 -15   2   1   30.30    3.30
 -15   2   1   32.80    4.10
   2  13   1   33.60    3.30
  13 -15   1   37.80    3.80
 -15   2   1   34.10    3.50
  -3 -13  -1  103.59    5.40
  -3 -13  -1   83.49    5.50
 -13  16  -1   79.09    3.70
 -13  16  -1   95.69    5.20
  16  -3  -1   81.89    5.60
  -3 -13  -1   81.49    7.10
  13 -16   1   98.69    6.10
  13 -16   1   87.39    5.10
   3  13   1   93.79    5.50
 -16   3   1  101.79    5.30
  -4 -13  -1    6.50    2.30
  -4 -13  -1    3.10    2.40
 -13  17  -1    3.80    2.40
 -13  17  -1    2.10    1.00
  -4 -13  -1    0.80    2.30
  17  -4  -1    1.50    2.50
 -17   4   1    2.40    2.30
 -17   4   1    3.80    2.90
   4  13   1    3.40    2.50
  13 -17   1   -0.40    2.30
 -13  18  -1   35.50    2.20
 -13  18  -1   37.00    2.50
  -5 -13  -1   41.30    4.10
  18  -5  -1   35.20    4.20
 -13  18  -1   33.80    3.70
  -5 -13  -1   31.20    4.00
  -5 -13  -1   36.60    3.80
 -18   5   1   36.00    4.00
  13 -18   1   28.20    3.30
  13 -18   1   33.50    4.00
 -18   5   1   42.10    3.80
   5  13   1   39.10    3.70
 -13  19  -1    7.20    1.20
  -6 -13  -1   12.00    2.70
  -6 -13  -1    8.10    2.40
 -13  19  -1    7.00    2.40
  -6 -13  -1    3.80    2.90
  13 -19   1    5.60    2.20
  13 -19   1    8.50    1.40
 -19   6   1    7.60    2.40
  13 -19   1    7.90    3.10
 -19   6   1    5.20    3.00
   6  13   1    3.90    2.30
  -7 -13  -1   10.80    2.90
  20  -7  -1   13.10    3.30
  -7 -13  -1   10.00    2.90
 -13  20  -1    8.40    2.90
 -20   7   1    7.90    3.00
 -20   7   1    7.50    2.50
  13 -20   1   10.00    3.10
   7  13   1    2.90    2.40
  13 -20   1    9.10    1.60
 -13  21  -1    7.30    2.40
  -8 -13  -1    5.00    2.80
  21  -8  -1    5.60    2.90
  -8 -13  -1    3.60    2.50
   8  13   1    9.50    3.00
  13 -21   1    8.40    1.50
  13 -21   1    4.80    2.70
 -21   8   1    9.70    3.10
  -9 -13  -1   14.60    3.30
  22  -9  -1   11.60    3.50
  -9 -13  -1   15.70    3.40
 -13  22  -1   11.80    2.90
 -22   9   1   11.60    3.40
   9  13   1   21.10    3.70
  13 -22   1   17.90    2.20
  13 -22   1   15.80    3.30
 -22   9   1    8.90    2.80
 -14  -8  -1   17.10    3.50
  22 -14  -1   14.60    3.60
  -8  22  -1   12.40    3.00
 -14  -8  -1   11.30    3.30
  14   8   1   15.30    3.70
   8 -22   1   16.60    2.60
 -22  14   1    9.90    3.10
 -22  14   1    9.80    2.10
   8 -22   1   14.10    3.30
 -14  -7  -1    2.60    2.80
  -7  21  -1   -0.50    2.10
  21 -14  -1    2.70    2.80
 -14  -7  -1   -0.40    2.90
  14   7   1    3.40    2.80
   7 -21   1    3.90    2.00
 -21  14   1   -2.50    2.50
 -21  14   1    0.10    2.10
 -14  -6  -1    8.50    2.70
  20 -14  -1    4.30    3.20
 -14  -6  -1    1.60    2.60
  -6  20  -1   -0.70    2.30
 -20  14   1    1.50    1.70
  14   6   1    4.20    2.70
   6 -20   1    4.70    2.10
   6 -20   1    6.40    2.60
 -14  -5  -1    7.90    3.10
  19 -14  -1    8.50    3.00
 -14  -5  -1   12.20    3.00
 -19  14   1    9.40    2.60
 -19  14   1    8.70    1.80
   5 -19   1   16.60    3.00
   5 -19   1   12.90    2.50
  14   5   1   15.60    3.20
   5 -19   1   18.00    3.50
  18 -14  -1    3.60    3.00
 -14  -4  -1    4.60    2.80
  -4  18  -1    3.30    2.40
 -14  -4  -1    2.50    3.10
  14   4   1    4.90    2.90
   4 -18   1    6.30    2.20
   4 -18   1    1.60    2.30
   4 -18   1    2.30    2.50
 -18  14   1    6.20    1.60
 -18  14   1    8.30    1.70
 -18  14   1    5.00    2.90
 -14  -3  -1   21.70    3.30
 -14  -3  -1   32.60    3.70
  17 -14  -1   24.90    3.60
  -3  17  -1   25.50    3.10
 -17  14   1   23.20    3.50
   3 -17   1   28.90    3.90
   3 -17   1   27.70    3.30
  14   3   1   26.50    3.60
 -17  14   1   30.10    2.60
 -17  14   1   20.70    2.50
   3 -17   1   29.00    3.50
  -2  16  -1   -0.30    3.60
 -14  -2  -1   -1.70    2.60
  16 -14  -1   -1.10    2.30
 -14  -2  -1    2.80    2.30
   2 -16   1    4.10    2.50
  14   2   1    4.00    2.40
   2 -16   1    4.40    2.30
 -16  14   1    2.50    1.50
 -16  14   1    1.90    2.50
   2 -16   1   -1.50    2.20
  15 -14  -1   52.29    3.80
 -14  -1  -1   69.19    4.80
  15 -14  -1   59.79    5.20
  -1  15  -1   69.99    5.20
 -14  -1  -1   64.19    4.50
 -15  14   1   62.19    3.40
   1 -15   1   54.09    4.50
   1 -15   1   59.49    4.50
 -15  14   1   60.49    3.40
 -15  14   1   62.29    4.40
   1 -15   1   68.69    4.60
  14   1   1   65.39    5.10
 -14   0  -1   11.70    2.50
  14 -14  -1    9.20    2.20
   0  14  -1   13.90    2.50
   0 -14   1    7.90    2.60
 -14  14   1   12.20    1.60
  14   0   1    8.30    2.60
   0 -14   1   11.40    2.60
   0 -14   1   14.60    2.60
 -14  14   1   11.60    1.70
 -14  14   1    6.90    2.20
  13 -14  -1   31.40    3.90
   1  13  -1   19.70    2.90
  13 -14  -1   23.70    2.70
 -14   1  -1   23.60    3.00
  13 -14  -1   24.70    2.40
 -14   1  -1   22.40    2.90
 -13  14   1   22.50    2.20
 -13  14   1   26.30    2.10
 -13  14   1   22.90    2.80
  14  -1   1   17.00    2.90
  -1 -13   1   28.50    3.00
  -1 -13   1   21.10    2.80
  -1 -13   1   19.20    2.50
  12 -14  -1   31.20    3.40
 -14   2  -1   31.50    4.20
  12 -14  -1   36.20    2.60
  12 -14  -1   29.80    3.30
 -14   2  -1   25.90    3.00
 -14   2  -1   30.60    3.30
  -2 -12   1   36.20    3.50
  14  -2   1   27.60    3.30
  -2 -12   1   32.50    3.00
  -2 -12   1   24.50    2.90
 -12  14   1   31.20    3.10
 -12  14   1   34.30    2.40
 -12  14   1   33.00    2.20
  11 -14  -1   20.20    2.80
   3  11  -1   16.70    3.70
 -14   3  -1   16.30    2.60
 -14   3  -1   23.00    2.90
  11 -14  -1   17.80    2.10
 -14   3  -1   21.20    2.90
  11 -14  -1   19.40    2.30
 -11  14   1   17.60    2.50
  -3 -11   1   14.80    2.50
 -11  14   1   14.20    1.90
  14  -3   1   19.60    2.60
  14  -3   1   17.80    2.80
  -3 -11   1   13.60    2.20
 -11  14   1   15.60    1.70
  -3 -11   1   14.00    2.40
  10 -14  -1   24.70    2.30
 -14   4  -1   31.10    3.10
 -14   4  -1   32.10    3.90
  10 -14  -1   27.40    3.00
  10 -14  -1   28.30    2.50
 -14   4  -1   26.40    3.30
   4  10  -1   29.10    4.10
  14  -4   1   31.70    2.80
 -10  14   1   31.50    2.80
  -4 -10   1   32.90    3.00
  14  -4   1   32.30    3.40
 -10  14   1   25.30    2.10
  -4 -10   1   30.50    3.10
   9 -14  -1    7.40    1.60
   9 -14  -1    9.20    1.80
   9 -14  -1   10.50    2.00
 -14   5  -1    9.80    1.80
   5   9  -1    8.70    2.20
 -14   5  -1    8.20    2.70
 -14   5  -1    6.60    2.20
  14  -5   1    8.60    2.30
  -9  14   1   11.70    1.90
  -5  -9   1   12.00    2.10
  14  -5   1   14.60    2.20
  -5  -9   1   14.10    2.10
  -9  14   1   10.90    1.30
  -5  -9   1   10.30    2.30
   8 -14  -1   24.30    2.40
 -14   6  -1   22.70    2.80
 -14   6  -1   19.70    2.30
   8 -14  -1   28.20    2.70
   8 -14  -1   21.50    2.20
   6   8  -1   18.60    2.40
  -8  14   1   20.90    2.20
  14  -6   1   29.00    2.70
  14  -6   1   28.60    3.20
  -6  -8   1   22.80    2.90
  -6  -8   1   24.40    2.70
  -6  -8   1   25.70    2.60
  -8  14   1   26.40    2.60
   7 -14  -1   15.30    2.10
   7 -14  -1   18.00    2.30
 -14   7  -1   18.70    2.50
   7 -14  -1   17.40    2.20
   7   7  -1   15.10    2.30
 -14   7  -1   21.30    2.30
  -7  -7   1   17.80    2.30
  -7  -7   1   16.70    2.30
  -7  14   1   15.70    2.10
  -7  -7   1   14.60    2.20
  14  -7   1   15.40    2.40
  14  -7   1   16.70    2.20
  14  -7   1   19.50    2.70
  -7  14   1   15.40    1.90
   6 -14  -1   72.89    4.00
   6 -14  -1   77.49    4.20
   6 -14  -1   71.49    4.00
 -14   8  -1   69.09    4.00
 -14   8  -1   69.29    4.40
 -14   8  -1   73.79    3.60
   8   6  -1   77.59    5.90
  -8  -6   1   65.99    4.20
  -8  -6   1   75.69    4.20
  14  -8   1   60.19    3.60
  14  -8   1   73.39    4.50
  -8  -6   1   66.69    4.00
  14  -8   1   72.99    5.90
  -6  14   1   71.49    4.80
  -6  14   1   63.99    3.40
   5 -14  -1  118.49    5.80
   5 -14  -1  132.99    6.00
   5 -14  -1  124.59    5.80
 -14   9  -1  120.69    6.00
 -14   9  -1  127.79    5.20
   9   5  -1  128.69    6.30
 -14   9  -1  128.59    6.20
  -9  -5   1  122.09    6.00
  -9  -5   1  128.59    6.00
  -5  14   1  123.09    6.20
  14  -9   1  121.79    6.20
  14  -9   1  125.59    6.00
  -9  -5   1  112.29    5.90
 -14  10  -1   47.20    2.60
  10   4  -1   47.90    3.50
   4 -14  -1   45.10    3.30
 -14  10  -1   45.90    2.90
 -14  10  -1   47.30    3.80
   4 -14  -1   44.20    3.40
   4 -14  -1   47.90    3.50
  -4  14   1   42.10    3.70
 -10  -4   1   40.50    3.30
 -10  -4   1   39.40    3.70
 -10  -4   1   40.10    3.40
  14 -10   1   39.30    3.10
  14 -10   1   43.30    3.80
   3 -14  -1   66.79    4.10
 -14  11  -1   69.09    3.20
  11   3  -1   68.79    4.60
 -14  11  -1   73.39    4.30
   3 -14  -1   66.79    4.10
   3 -14  -1   74.29    4.30
 -14  11  -1   62.89    3.40
  14 -11   1   65.09    4.80
  14 -11   1   63.89    4.00
  -3  14   1   61.19    3.90
 -11  -3   1   61.99    4.40
 -11  -3   1   64.59    4.00
 -11  -3   1   59.99    4.10
   2 -14  -1   85.09    4.40
 -14  12  -1   80.49    4.60
 -14  12  -1   81.49    3.60
  12   2  -1   87.59    4.90
 -14  12  -1   77.49    3.70
   2 -14  -1   80.89    6.00
   2 -14  -1   71.29    4.50
  14 -12   1   71.09    4.80
  14 -12   1   74.69    4.20
 -12  -2   1   71.99    4.50
 -12  -2   1   74.59    4.40
  -2  14   1   76.39    4.50
  13   1  -1   28.90    3.50
   1 -14  -1   28.80    3.00
 -14  13  -1   29.70    2.10
 -14  13  -1   27.90    3.50
   1 -14  -1   28.30    3.30
 -13  -1   1   30.50    3.20
  14 -13   1   30.40    3.20
  14 -13   1   33.00    4.80
 -13  -1   1   28.20    3.30
 -13  -1   1   30.00    3.70
  -1  14   1   31.20    3.30
 -14  14  -1  157.28    6.30
   0 -14  -1  157.28    7.40
   0 -14  -1  169.08    7.40
 -14  14  -1  167.28    6.90
 -14  14  -1  169.08    7.60
  14   0  -1  159.98    7.80
   0 -14  -1  172.48    7.60
 -14   0   1  165.28    8.40
  14 -14   1  161.38    7.50
   0  14   1  157.28    7.20
  14 -14   1  169.18    7.90
 -14   0   1  164.88    7.80
 -14   0   1  182.58    7.60
  -1 -14  -1   70.69    4.80
 -14  15  -1   68.89    3.20
 -14  15  -1   76.19    5.10
  -1 -14  -1   74.99    5.00
  -1 -14  -1   84.69    5.10
  15  -1  -1   69.39    5.10
 -15   1   1   78.59    4.60
  14 -15   1   65.89    5.30
   1  14   1   73.99    4.60
 -15   1   1   75.29    6.70
  14 -15   1   76.09    5.10
 -15   1   1   73.29    5.00
  16  -2  -1   29.50    3.80
  -2 -14  -1   24.90    3.40
 -14  16  -1   23.50    1.80
  -2 -14  -1   28.70    3.30
 -14  16  -1   30.70    3.40
  -2 -14  -1   31.10    3.90
 -16   2   1   29.30    3.60
   2  14   1   24.20    3.10
  14 -16   1   23.10    3.50
  17  -3  -1   26.90    3.80
 -14  17  -1   17.00    1.60
  -3 -14  -1   21.00    3.20
 -14  17  -1   23.70    3.00
  -3 -14  -1   25.50    3.10
 -17   3   1   19.50    2.90
   3  14   1   21.50    2.90
  14 -17   1   16.50    3.30
  14 -17   1   17.40    2.80
 -17   3   1   15.40    3.00
 -14  18  -1   18.50    1.70
  -4 -14  -1   22.70    3.20
  -4 -14  -1   20.80    3.10
  -4 -14  -1   19.70    3.20
  18  -4  -1   18.30    3.40
 -14  18  -1   19.70    3.10
  14 -18   1   18.60    3.10
 -18   4   1   18.60    2.90
 -18   4   1   17.90    3.30
  14 -18   1   15.50    2.50
   4  14   1   18.50    3.00
  -5 -14  -1   -0.50    2.10
  19  -5  -1   -7.80    4.00
  -5 -14  -1   -5.90    2.50
 -14  19  -1   -4.70    2.10
  -5 -14  -1   -3.60    1.90
 -14  19  -1   -2.30    0.90
  14 -19   1   -4.00    2.60
  14 -19   1   -2.30    1.80
 -19   5   1    0.40    2.90
   5  14   1   -3.70    2.00
 -19   5   1   -0.60    2.20
  20  -6  -1   -1.10    2.80
  -6 -14  -1    9.40    2.80
 -14  20  -1   -0.70    2.50
  -6 -14  -1    1.90    2.60
   6  14   1    3.20    2.40
  14 -20   1    3.00    2.90
 -20   6   1   -2.30    2.50
 -20   6   1    1.70    2.40
  -7 -14  -1   -1.90    2.70
 -14  21  -1    0.40    2.60
  21  -7  -1    2.60    3.40
 -14  21  -1    2.20    1.30
 -21   7   1    1.70    3.00
  14 -21   1    1.30    1.30
  14 -21   1    0.60    2.70
   7  14   1    2.10    2.70
 -14  22  -1    6.90    1.60
  22  -8  -1   12.10    3.40
 -14  22  -1    4.60    3.10
  -8 -14  -1    6.80    3.40
  14 -22   1    4.60    3.20
 -22   8   1    7.80    3.00
 -22   8   1    4.60    2.60
   8  14   1    9.50    2.90
  -7  22  -1   -1.20    2.60
 -15  -7  -1   -1.50    3.20
 -15  -7  -1   -2.20    2.40
  22 -15  -1    5.00    3.40
   7 -22   1    3.10    2.00
 -22  15   1   -0.70    3.30
   7 -22   1   -0.20    2.80
 -22  15   1   -3.20    1.70
  15   7   1   -3.40    2.50
  -6  21  -1   17.00    2.90
 -15  -6  -1   13.70    3.40
  21 -15  -1   11.50    3.30
 -15  -6  -1   10.50    3.10
  15   6   1   17.60    4.10
   6 -21   1   16.30    2.80
   6 -21   1   11.80    3.00
 -21  15   1   14.10    3.50
  20 -15  -1    0.40    2.80
  -5  20  -1    6.20    2.50
 -15  -5  -1    0.80    2.50
 -15  -5  -1    2.40    2.40
   5 -20   1    0.50    2.20
 -20  15   1    0.50    1.60
   5 -20   1    2.70    2.30
  15   5   1    4.80    2.70
  19 -15  -1   43.60    4.60
  -4  19  -1   27.70    3.30
 -15  -4  -1   39.50    4.50
 -15  -4  -1   34.30    4.00
 -19  15   1   37.20    4.50
   4 -19   1   38.50    4.20
  15   4   1   41.80    4.80
   4 -19   1   38.50    3.90
 -19  15   1   31.90    2.80
 -15  -3  -1   11.60    2.80
 -15  -3  -1    7.90    2.80
  -3  18  -1   12.50    2.60
  18 -15  -1   16.50    3.50
   3 -18   1   10.00    2.40
   3 -18   1   10.70    2.60
 -18  15   1    9.30    1.70
  15   3   1   13.70    3.20
   3 -18   1   12.10    2.60
 -18  15   1   12.60    3.20
  17 -15  -1   99.29    6.60
 -15  -2  -1  104.29    5.90
 -15  -2  -1   85.89    5.50
  -2  17  -1   98.19    5.20
 -17  15   1   88.99    6.00
   2 -17   1   91.49    5.50
   2 -17   1   90.59    5.30
 -17  15   1   95.49    4.50
 -17  15   1   88.89    4.40
   2 -17   1   92.79    5.50
  15   2   1   94.09    6.20
  -1  16  -1    7.70    2.60
 -15  -1  -1   10.70    2.50
  16 -15  -1   10.60    2.90
 -15  -1  -1    8.30    2.60
   1 -16   1   10.60    2.60
   1 -16   1   13.10    2.50
 -16  15   1    7.90    2.80
 -16  15   1    9.10    1.70
  15   1   1    8.00    2.70
   1 -16   1    8.40    2.60
  15 -15  -1  140.39    7.50
 -15   0  -1  128.69    9.40
 -15   0  -1  140.79    6.70
   0  15  -1  142.19    8.80
  15 -15  -1  128.79    6.50
   0 -15   1  140.29    6.70
   0 -15   1  129.79    6.70
 -15  15   1  132.19    6.70
  15   0   1  128.69    6.90
 -15  15   1  131.49    5.50
   0 -15   1  128.39    6.70
 -15  15   1  126.89    5.60
 -15   1  -1   64.19    4.20
   1  14  -1   61.09    6.30
  14 -15  -1   60.79    4.70
  14 -15  -1   51.49    4.20
 -15   1  -1   64.19    4.60
 -14  15   1   61.19    3.20
  -1 -14   1   58.89    4.30
 -14  15   1   66.59    3.50
  -1 -14   1   74.99    4.80
  15  -1   1   64.59    4.80
 -14  15   1   64.99    4.70
  -1 -14   1   57.39    4.50
  13 -15  -1   53.39    4.30
 -15   2  -1   57.79    4.20
   2  13  -1   51.59    4.30
 -15   2  -1   53.49    4.10
  13 -15  -1   52.39    3.20
  13 -15  -1   42.40    3.40
  -2 -13   1   54.79    4.30
 -13  15   1   49.99    3.10
 -13  15   1   50.79    2.80
 -13  15   1   46.00    4.20
  15  -2   1   48.40    4.40
  -2 -13   1   45.60    3.70
  12 -15  -1   18.70    2.30
 -15   3  -1   24.30    3.30
  12 -15  -1   22.60    3.00
   3  12  -1   23.00    3.00
 -15   3  -1   25.20    3.20
 -12  15   1   23.10    2.20
 -12  15   1   22.00    1.90
  -3 -12   1   23.60    2.90
  15  -3   1   18.90    3.10
  -3 -12   1   17.80    2.60
  -3 -12   1   21.80    3.10
 -12  15   1   25.80    2.90
   4  11  -1   72.19    4.40
  11 -15  -1   74.19    4.30
  11 -15  -1   78.49    3.90
 -15   4  -1   73.99    5.00
 -15   4  -1   82.59    4.40
 -11  15   1   75.79    4.40
  -4 -11   1   74.49    4.60
  15  -4   1   69.69    4.90
  -4 -11   1   78.19    4.60
 -11  15   1   74.99    3.50
  -4 -11   1   74.79    4.50
  10 -15  -1   65.29    4.30
 -15   5  -1   63.89    5.60
 -15   5  -1   69.59    4.70
   5  10  -1   69.69    5.00
  10 -15  -1   60.69    3.60
  10 -15  -1   64.29    3.80
  15  -5   1   64.19    4.60
 -10  15   1   60.19    4.20
  -5 -10   1   58.29    3.90
  -5 -10   1   62.79    4.30
  -5 -10   1   73.09    4.50
 -10  15   1   64.69    4.00
  15  -5   1   59.69    4.30
 -15   6  -1   58.29    3.50
   9 -15  -1   53.39    4.20
 -15   6  -1   53.89    3.90
   9 -15  -1   50.79    3.70
   6   9  -1   51.19    5.70
   9 -15  -1   54.69    3.40
  -9  15   1   57.19    3.90
  -6  -9   1   53.09    4.00
  -6  -9   1   55.39    3.90
  -9  15   1   51.49    2.80
  15  -6   1   51.29    3.70
  15  -6   1   53.89    4.50
  -6  -9   1   58.39    3.90
   8 -15  -1   42.80    3.00
 -15   7  -1   41.90    3.60
 -15   7  -1   39.00    2.90
   8 -15  -1   42.20    3.10
   7   8  -1   43.70    5.10
   8 -15  -1   47.00    3.60
  -8  15   1   44.40    3.20
  -7  -8   1   45.50    3.80
  15  -7   1   42.10    3.40
  -8  15   1   39.40    2.60
  -7  -8   1   39.40    3.90
  -7  -8   1   46.20    3.60
  15  -7   1   42.00    4.30
 -15   8  -1   44.50    3.10
   7 -15  -1   50.19    3.60
   7 -15  -1   49.99    4.50
 -15   8  -1   39.40    3.60
   7 -15  -1   44.80    3.30
   8   7  -1   50.59    4.00
  15  -8   1   47.20    3.60
  -7  15   1   41.60    2.80
  -8  -7   1   51.19    3.70
  15  -8   1   41.70    3.30
  -8  -7   1   44.70    3.70
  15  -8   1   47.10    4.00
  -7  15   1   49.00    3.60
   6 -15  -1   19.00    2.30
   6 -15  -1   14.80    3.70
 -15   9  -1   16.10    2.30
   6 -15  -1   17.00    2.30
 -15   9  -1   22.00    3.00
   9   6  -1   20.70    2.60
 -15   9  -1   19.10    2.40
  -9  -6   1   19.80    2.80
  15  -9   1   16.90    2.30
  -9  -6   1   18.90    2.60
  -6  15   1   22.70    2.60
  15  -9   1   19.50    2.90
  15  -9   1   20.30    2.30
  -9  -6   1   18.80    3.80
 -15  10  -1    6.30    2.30
   5 -15  -1    6.50    2.00
 -15  10  -1    6.80    1.60
   5 -15  -1    8.50    2.10
   5 -15  -1    8.10    2.30
 -15  10  -1    8.20    1.50
  10   5  -1    5.80    2.10
  -5  15   1   10.20    2.10
  15 -10   1    4.40    2.50
 -10  -5   1    6.40    2.00
 -10  -5   1    4.10    3.60
  15 -10   1    6.90    1.90
 -10  -5   1    5.00    2.40
   4 -15  -1   36.60    3.10
 -15  11  -1   32.30    2.40
 -15  11  -1   31.10    2.90
   4 -15  -1   37.90    3.40
  11   4  -1   31.40    3.70
 -15  11  -1   34.60    3.70
 -11  -4   1   40.00    3.80
  -4  15   1   36.20    3.00
  15 -11   1   37.00    3.70
 -11  -4   1   35.40    3.40
  15 -11   1   31.90    3.30
 -15  12  -1    5.00    1.30
   3 -15  -1    0.80    2.10
   3 -15  -1    2.50    2.10
   3 -15  -1    2.60    2.00
 -15  12  -1    3.00    2.30
 -15  12  -1    5.20    1.30
  12   3  -1    5.30    2.20
  15 -12   1    4.70    2.30
  -3  15   1    5.90    2.20
 -12  -3   1    5.60    2.90
 -12  -3   1    5.30    2.20
   2 -15  -1   39.90    3.40
 -15  13  -1   31.90    2.40
 -15  13  -1   30.70    2.30
   2 -15  -1   27.50    3.70
  13   2  -1   39.40    3.70
 -15  13  -1   37.90    3.60
   2 -15  -1   32.40    3.20
 -13  -2   1   32.10    4.00
  -2  15   1   33.90    3.50
  15 -13   1   33.40    3.90
  15 -13   1   27.20    3.10
 -13  -2   1   38.50    4.10
 -13  -2   1   31.10    3.70
   1 -15  -1   69.19    4.60
  14   1  -1   71.79    4.90
   1 -15  -1   67.79    4.50
 -15  14  -1   74.79    4.80
 -15  14  -1   67.79    3.40
   1 -15  -1   74.09    4.90
 -14  -1   1   77.79    5.20
  15 -14   1   63.29    4.30
 -14  -1   1   74.59    4.90
  -1  15   1   74.19    4.50
 -14  -1   1   84.89    5.10
  15 -14   1   79.09    5.70
   0 -15  -1    2.70    2.40
   0 -15  -1   -1.30    2.10
 -15  15  -1   -1.00    2.10
  15   0  -1   -3.30    2.30
 -15  15  -1    2.10    1.00
  15 -15   1   -2.20    2.50
 -15   0   1    0.30    2.70
   0  15   1   -1.20    2.00
 -15   0   1    0.90    2.40
  15 -15   1   -5.40    1.90
 -15   0   1    0.50    2.40
  16  -1  -1   29.50    3.60
  -1 -15  -1   32.50    3.50
 -15  16  -1   32.30    3.70
  -1 -15  -1   29.80    4.00
  -1 -15  -1   29.70    3.70
 -15  16  -1   28.80    1.80
 -16   1   1   33.70    3.50
  15 -16   1   30.20    3.70
   1  15   1   26.50    3.30
 -16   1   1   28.40    3.70
  15 -16   1   26.80    3.00
  -2 -15  -1    1.10    2.70
 -15  17  -1    3.60    0.90
  17  -2  -1    4.70    2.70
 -15  17  -1    3.20    2.50
  -2 -15  -1    7.60    2.20
  -2 -15  -1    5.20    2.70
  15 -17   1    4.00    2.60
 -17   2   1    3.90    2.60
  15 -17   1    2.70    2.10
   2  15   1    1.80    2.10
 -17   2   1    2.00    2.20
 -15  18  -1   41.10    2.20
  -3 -15  -1   49.90    4.00
  18  -3  -1   45.60    4.60
  -3 -15  -1   57.99    4.60
 -15  18  -1   49.30    4.60
  -3 -15  -1   47.40    4.30
  15 -18   1   41.40    3.90
   3  15   1   47.60    4.10
 -18   3   1   49.80    4.90
  15 -18   1   45.30    4.40
 -18   3   1   46.70    4.00
 -15  19  -1   -0.40    0.90
  -4 -15  -1   -2.20    2.30
 -15  19  -1    0.30    2.30
 -19   4   1    5.30    2.50
 -19   4   1    2.50    2.90
  15 -19   1    4.00    2.80
   4  15   1   -0.60    2.50
 -15  20  -1   19.20    3.10
  20  -5  -1   18.70    3.50
  -5 -15  -1   17.40    3.20
 -20   5   1   20.90    3.70
 -20   5   1   19.70    3.00
   5  15   1   17.90    3.00
  15 -20   1   21.20    3.80
 -15  21  -1    3.10    2.90
  -6 -15  -1    9.50    2.90
  -6 -15  -1   -2.80    2.90
  21  -6  -1    6.40    3.20
  15 -21   1   -1.40    3.50
   6  15   1    6.30    2.80
 -21   6   1   -0.50    2.70
  -7 -15  -1   18.70    3.40
 -15  22  -1   17.00    3.30
  22  -7  -1   31.10    4.50
  -7 -15  -1   22.10    3.90
 -22   7   1   20.30    4.00
   7  15   1   23.70    3.70
  15 -22   1   22.60    3.50
 -22   7   1   16.20    3.10
  22 -16  -1    5.60    3.20
 -16  -6  -1    0.30    3.20
 -16  -6  -1    5.90    3.00
   6 -22   1    4.80    2.90
 -22  16   1    1.60    2.80
 -22  16   1    1.20    1.80
   6 -22   1    8.50    2.20
  16   6   1    5.30    3.30
 -16  -5  -1   13.00    3.20
 -16  -5  -1   16.90    3.20
  21 -16  -1   19.40    4.00
  -5  21  -1   12.40    2.80
 -21  16   1    9.70    2.00
   5 -21   1   11.70    2.50
  16   5   1   20.20    3.40
   5 -21   1    9.30    2.80
 -21  16   1   11.10    3.00
  -4  20  -1    0.90    2.40
 -16  -4  -1    0.90    2.80
 -16  -4  -1   -1.20    2.60
  20 -16  -1   -3.80    2.60
   4 -20   1    1.30    2.30
  -3  19  -1   19.80    3.00
 -16  -3  -1   17.30    3.10
 -16  -3  -1   11.50    3.30
  19 -16  -1   21.80    4.00
   3 -19   1   18.60    3.00
  16   3   1   21.10    3.60
 -19  16   1   13.00    1.90
   3 -19   1   16.40    3.10
 -19  16   1   17.60    3.20
 -16  -2  -1    1.30    2.50
  18 -16  -1    3.70    3.00
  -2  18  -1    4.90    2.40
 -16  -2  -1   -3.80    2.40
 -18  16   1   -1.20    2.30
  16   2   1    4.00    2.60
   2 -18   1    0.50    2.40
 -18  16   1   -1.10    1.40
   2 -18   1    1.50    2.30
  17 -16  -1    6.70    3.10
 -16  -1  -1    8.20    2.70
 -16  -1  -1    7.60    2.60
  -1  17  -1   12.00    2.50
  16   1   1   11.90    3.10
 -17  16   1    7.10    1.60
 -17  16   1    8.40    2.60
   1 -17   1    9.80    2.40
   1 -17   1    7.70    2.50
   1 -17   1   15.30    2.60
 -16   0  -1    9.00    2.70
   0  16  -1    6.10    2.50
  16 -16  -1    3.90    2.90
 -16   0  -1    6.60    2.50
   0 -16   1    4.80    2.20
   0 -16   1    4.50    2.60
   0 -16   1    3.10    2.50
 -16  16   1    7.80    1.30
 -16  16   1    6.10    1.50
 -16  16   1    3.80    2.40
  16   0   1    8.90    3.20
 -16   1  -1    9.20    3.10
  15 -16  -1    9.50    2.30
   1  15  -1    3.70    2.50
  15 -16  -1    8.90    2.70
 -16   1  -1    9.70    2.40
 -15  16   1   14.00    1.80
  -1 -15   1   11.10    2.80
  -1 -15   1   15.20    2.90
 -15  16   1   10.70    1.60
 -15  16   1   11.00    2.90
  16  -1   1   12.70    3.00
  -1 -15   1   11.70    2.40
  14 -16  -1    3.80    1.50
  14 -16  -1    3.00    1.90
 -16   2  -1   -1.70    2.50
  14 -16  -1    3.60    2.70
 -16   2  -1    4.80    2.30
   2  14  -1    0.30    2.30
  -2 -14   1    3.40    2.30
 -14  16   1    2.90    1.20
 -14  16   1    2.10    1.40
 -14  16   1    0.00    2.10
  -2 -14   1    1.70    2.20
  16  -2   1    1.50    2.90
  -2 -14   1    2.90    2.20
  13 -16  -1   16.20    2.30
   3  13  -1   18.70    3.20
  13 -16  -1   18.50    3.30
 -16   3  -1   11.80    2.60
 -16   3  -1   14.40    2.40
  13 -16  -1   11.00    2.50
 -13  16   1   14.00    2.80
  -3 -13   1   14.90    2.60
 -13  16   1   14.00    1.90
  -3 -13   1    9.50    2.40
 -13  16   1   16.60    2.10
  16  -3   1   13.20    2.90
  -3 -13   1   11.40    2.50
   4  12  -1   34.80    4.10
 -16   4  -1   35.20    4.20
  12 -16  -1   42.90    4.40
  12 -16  -1   39.70    3.60
  12 -16  -1   40.80    2.90
 -16   4  -1   39.70    3.70
 -12  16   1   42.30    2.80
  -4 -12   1   37.40    3.80
  16  -4   1   42.10    4.20
 -12  16   1   40.30    2.50
  -4 -12   1   44.20    3.50
  -4 -12   1   35.10    3.50
 -12  16   1   32.10    3.90
 -16   5  -1   33.00    3.40
 -16   5  -1   29.00    3.60
  11 -16  -1   37.70    2.80
  11 -16  -1   33.90    3.70
  11 -16  -1   28.90    4.20
   5  11  -1   34.20    3.40
  -5 -11   1   40.10    4.10
  16  -5   1   31.90    3.90
  -5 -11   1   31.50    3.30
  -5 -11   1   32.60    3.70
 -11  16   1   35.60    3.70
   6  10  -1   61.49    4.40
  10 -16  -1   67.89    4.80
  10 -16  -1   66.79    4.70
 -16   6  -1   59.29    4.40
 -16   6  -1   67.59    4.00
  10 -16  -1   64.39    3.80
 -10  16   1   69.59    4.50
  -6 -10   1   60.59    4.50
  16  -6   1   75.19    5.40
  -6 -10   1   70.59    4.60
 -10  16   1   64.09    3.30
  -6 -10   1   68.29    4.40
   9 -16  -1   42.50    3.40
   9 -16  -1   52.89    4.30
   7   9  -1   49.70    4.00
 -16   7  -1   59.69    3.60
   9 -16  -1   52.59    3.50
 -16   7  -1   46.80    4.30
  -7  -9   1   57.19    4.20
  -7  -9   1   49.70    3.70
  16  -7   1   51.59    4.20
  16  -7   1   48.70    4.70
  -9  16   1   51.89    3.00
  -7  -9   1   48.50    4.00
  -9  16   1   51.19    3.90
   8 -16  -1   54.79    4.10
 -16   8  -1   62.49    3.50
   8 -16  -1   65.59    3.80
   8   8  -1   62.69    4.20
 -16   8  -1   62.69    4.30
   8 -16  -1   61.09    4.40
  16  -8   1   57.69    4.60
  -8  16   1   64.39    4.20
  -8  -8   1   53.49    4.40
  16  -8   1   59.79    4.30
  -8  16   1   68.09    3.80
  -8  -8   1   65.39    4.20
  -8  -8   1   69.29    4.30
 -16   9  -1   61.29    4.20
   9   7  -1   51.89    4.00
   7 -16  -1   58.69    4.40
   7 -16  -1   60.29    3.90
   7 -16  -1   54.29    3.80
 -16   9  -1   58.39    3.50
  -7  16   1   54.99    4.00
  -9  -7   1   54.19    3.90
  16  -9   1   54.49    4.60
  16  -9   1   54.39    3.80
  -9  -7   1   56.09    4.40
  -9  -7   1   54.69    4.10
   6 -16  -1  108.99    5.60
  10   6  -1  104.69    5.80
   6 -16  -1  107.89    5.20
 -16  10  -1   95.99    5.00
   6 -16  -1   98.89    5.10
 -16  10  -1  100.29    4.50
 -16  10  -1  106.19    5.60
  16 -10   1   90.09    4.60
 -10  -6   1  102.89    5.70
 -10  -6   1   98.09    5.40
  16 -10   1   98.29    6.20
 -10  -6   1   96.59    5.90
  16 -10   1  101.49    5.30
  -6  16   1   91.69    5.10
 -16  11  -1  165.68    7.10
 -16  11  -1  160.58    7.60
 -16  11  -1  166.18    6.50
   5 -16  -1  162.18    7.30
   5 -16  -1  171.98    7.40
  11   5  -1  168.78    7.70
   5 -16  -1  168.38    7.90
 -11  -5   1  160.68    7.50
  -5  16   1  161.78    7.30
 -11  -5   1  168.48    7.50
  16 -11   1  158.08    7.20
   4 -16  -1   62.49    4.10
   4 -16  -1   56.19    4.20
   4 -16  -1   57.09    4.30
 -16  12  -1   56.39    3.20
  12   4  -1   61.59    4.80
 -16  12  -1   52.29    4.20
 -12  -4   1   65.49    4.40
  16 -12   1   51.19    3.90
  -4  16   1   56.99    3.90
 -12  -4   1   52.19    4.60
  16 -12   1   66.89    5.30
 -12  -4   1   61.69    4.30
 -16  13  -1   80.99    4.20
   3 -16  -1   93.79    5.40
   3 -16  -1   90.29    5.10
 -16  13  -1   81.49    5.50
 -16  13  -1   83.19    3.90
   3 -16  -1   84.69    5.30
  13   3  -1   85.39    5.20
  16 -13   1   95.59    6.20
  16 -13   1   83.19    5.10
  -3  16   1  100.59    5.20
 -13  -3   1   97.59    5.70
 -13  -3   1   86.19    5.40
   2 -16  -1   21.90    3.10
 -16  14  -1   27.90    2.20
   2 -16  -1   25.00    3.20
  14   2  -1   22.60    3.50
 -16  14  -1   23.00    3.10
 -16  14  -1   21.90    2.10
 -14  -2   1   30.40    4.00
  -2  16   1   27.80    3.10
 -14  -2   1   22.20    3.20
  16 -14   1   20.50    3.40
 -14  -2   1   20.60    3.10
  16 -14   1   26.10    3.10
   1 -16  -1   28.50    3.40
  15   1  -1   31.60    3.80
 -16  15  -1   28.30    3.40
 -16  15  -1   30.60    2.00
   1 -16  -1   26.30    3.80
   1 -16  -1   25.10    3.20
  16 -15   1   28.60    3.60
 -15  -1   1   36.20    4.10
  16 -15   1   30.00    3.20
  -1  16   1   28.40    3.30
 -15  -1   1   30.50    3.70
   0 -16  -1   31.80    3.60
  16   0  -1   42.60    4.70
   0 -16  -1   35.30    4.10
 -16  16  -1   37.70    4.20
 -16  16  -1   35.50    2.00
   0 -16  -1   39.80    3.60
   0  16   1   33.20    3.40
  16 -16   1   30.10    4.00
 -16   0   1   36.10    4.00
 -16   0   1   30.70    3.70
  16 -16   1   31.00    3.60
  -1 -16  -1   12.80    2.50
  -1 -16  -1   10.90    3.00
 -16  17  -1   10.90    1.40
 -16  17  -1   10.00    3.00
  -1 -16  -1   10.60    2.60
  17  -1  -1   11.30    3.30
   1  16   1   10.30    2.80
  16 -17   1   11.50    2.30
 -17   1   1    4.40    2.80
  16 -17   1    9.90    3.20
 -17   1   1    7.70    3.10
 -16  18  -1   26.60    3.70
 -16  18  -1   29.80    1.70
  -2 -16  -1   36.60    3.90
 -16  18  -1   28.80    2.10
  18  -2  -1   43.90    5.10
  -2 -16  -1   37.70    4.10
  -2 -16  -1   39.80    5.20
  16 -18   1   31.90    4.10
   2  16   1   30.30    3.60
 -18   2   1   35.10    4.10
 -18   2   1   32.10    4.20
  16 -18   1   26.70    3.30
 -16  19  -1   25.30    1.80
 -16  19  -1   24.80    1.70
  -3 -16  -1   30.40    4.40
  -3 -16  -1   26.20    3.70
 -16  19  -1   23.10    3.30
   3  16   1   28.50    3.60
  16 -19   1   27.10    4.10
 -19   3   1   33.90    4.10
 -16  20  -1   12.20    2.90
  20  -4  -1   17.80    4.00
  -4 -16  -1   11.90    3.20
  -4 -16  -1   11.00    2.80
 -16  20  -1   11.70    1.30
 -20   4   1   13.80    3.00
 -20   4   1   12.50    3.00
   4  16   1   11.00    3.10
  16 -20   1    8.10    3.30
  -5 -16  -1    1.30    3.00
 -16  21  -1    1.90    2.60
  21  -5  -1    4.70    3.40
   5  16   1    4.80    2.50
 -21   5   1   -1.60    2.60
 -21   5   1    3.30    3.20
 -16  22  -1    9.70    3.40
  22  -6  -1   14.00    3.50
  -6 -16  -1   11.60    3.20
 -22   6   1    6.60    3.00
   6  16   1    7.50    3.20
  16 -22   1   14.60    3.50
 -22   6   1    7.50    2.90
 -17  -4  -1   21.00    3.70
  -4  21  -1   12.90    3.00
  21 -17  -1   18.20    4.10
 -17  -4  -1   15.40    3.50
   4 -21   1   16.50    2.90
 -21  17   1   13.00    3.60
   4 -21   1   17.80    3.50
 -21  17   1   11.10    1.90
  17   4   1   23.90    3.90
  20 -17  -1    5.40    3.00
  -3  20  -1    7.10    2.80
 -17  -3  -1    6.20    2.80
 -17  -3  -1    9.60    2.90
   3 -20   1    4.10    2.60
  17   3   1    8.90    3.00
   3 -20   1    7.10    3.00
  19 -17  -1   59.19    5.30
 -17  -2  -1   53.69    4.60
 -17  -2  -1   60.59    5.40
  -2  19  -1   58.79    4.60
   2 -19   1   51.69    4.60
  17   2   1   51.39    5.90
 -19  17   1   44.20    3.00
 -19  17   1   57.19    5.30
   2 -19   1   54.99    4.80
 -17  -1  -1   19.10    3.40
  18 -17  -1   21.00    3.80
  -1  18  -1   25.10    3.30
 -17  -1  -1   20.60    3.20
   1 -18   1   15.80    3.10
 -18  17   1   19.10    3.30
   1 -18   1   24.50    3.40
 -18  17   1   15.20    1.90
   0  17  -1   62.99    4.70
  17 -17  -1   65.59    5.60
 -17   0  -1   64.89    4.90
  17   0   1   59.49    5.70
   0 -17   1   58.29    4.80
 -17  17   1   55.09    3.30
 -17  17   1   55.99    4.60
   0 -17   1   62.29    4.90
 -17  17   1   64.09    3.40
   1  16  -1    6.10    2.40
 -17   1  -1    5.90    2.40
  16 -17  -1   13.80    3.10
 -17   1  -1    9.50    2.90
  -1 -16   1    7.80    2.50
 -16  17   1    6.60    2.50
 -16  17   1    6.80    1.50
  -1 -16   1    5.50    2.40
  -1 -16   1    7.10    2.50
  17  -1   1   12.80    3.20
   2  15  -1  101.89    5.70
  15 -17  -1   90.89    5.90
 -17   2  -1   89.79    5.70
 -17   2  -1   92.49    5.50
  -2 -15   1   98.59    5.70
 -15  17   1   88.59    4.40
  -2 -15   1  105.49    5.80
 -15  17   1  106.59    6.00
  17  -2   1   93.09    6.20
 -15  17   1   88.69    4.00
  -2 -15   1   98.59    5.80
   3  14  -1   26.00    3.20
  14 -17  -1   23.40    2.50
  14 -17  -1   27.20    3.60
  14 -17  -1   21.30    2.90
 -17   3  -1   28.40    3.70
  17  -3   1   31.90    4.10
 -14  17   1   24.10    2.50
  -3 -14   1   24.10    3.30
 -14  17   1   26.40    2.10
 -14  17   1   20.70    3.00
  -3 -14   1   31.60    3.40
 -17   4  -1   53.49    4.60
  13 -17  -1   49.00    4.30
   4  13  -1   47.90    4.20
  13 -17  -1   48.70    3.10
  13 -17  -1   38.80    3.50
 -17   4  -1   56.99    4.10
 -13  17   1   50.89    4.40
  -4 -13   1   43.80    3.90
  -4 -13   1   54.79    4.30
  17  -4   1   43.90    4.30
 -13  17   1   47.00    3.70
 -13  17   1   49.00    3.20
  -4 -13   1   45.60    4.10
   5  12  -1   30.40    3.80
  12 -17  -1   33.00    2.70
  12 -17  -1   28.90    3.10
 -17   5  -1   29.90    3.50
 -17   5  -1   34.80    3.60
  12 -17  -1   29.50    3.70
  -5 -12   1   29.90    3.40
  17  -5   1   29.30    3.70
  -5 -12   1   30.10    3.30
  -5 -12   1   28.70    4.20
 -12  17   1   27.60    3.20
 -12  17   1   28.20    3.40
  11 -17  -1   74.89    5.20
 -17   6  -1   74.59    5.20
   6  11  -1   66.29    4.70
  11 -17  -1   65.49    4.50
  11 -17  -1   66.29    3.90
 -17   6  -1   69.29    4.30
  -6 -11   1   64.79    4.80
 -11  17   1   65.89    3.40
  -6 -11   1   71.59    4.90
 -11  17   1   69.19    4.80
  17  -6   1   75.49    5.20
  -6 -11   1   74.49    4.80
  10 -17  -1   29.60    2.80
  10 -17  -1   26.90    3.20
  10 -17  -1   37.90    4.10
   7  10  -1   34.60    3.80
 -17   7  -1   29.30    3.60
 -17   7  -1   32.60    3.20
  -7 -10   1   25.50    3.30
  -7 -10   1   29.60    3.40
  -7 -10   1   32.50    3.70
  17  -7   1   33.60    4.00
 -10  17   1   30.70    3.70
 -10  17   1   24.60    2.40
 -17   8  -1   56.09    4.30
   8   9  -1   55.79    4.20
   9 -17  -1   48.30    3.60
   9 -17  -1   51.09    4.10
 -17   8  -1   61.59    5.80
  -8  -9   1   63.99    4.80
  -9  17   1   49.99    3.90
  17  -8   1   53.39    4.80
  -8  -9   1   59.29    4.50
  -8  -9   1   48.90    4.00
 -17   9  -1   23.70    3.30
   8 -17  -1   18.70    2.50
 -17   9  -1   20.30    2.30
   9   8  -1   16.50    2.80
   8 -17  -1   18.40    2.80
  -9  -8   1   19.00    3.60
  -9  -8   1   17.60    2.80
  -8  17   1   21.00    2.90
  -9  -8   1   19.10    3.00
   7 -17  -1    1.80    3.20
  10   7  -1    5.70    2.70
 -17  10  -1    2.70    2.70
 -17  10  -1    4.70    1.70
   7 -17  -1    7.60    2.50
   7 -17  -1    2.70    2.10
 -10  -7   1    5.40    2.70
  17 -10   1    4.00    3.00
  -7  17   1    6.80    2.20
 -10  -7   1    3.40    2.50
 -17  11  -1    6.40    1.60
  11   6  -1    8.60    2.50
   6 -17  -1    7.10    2.50
 -17  11  -1    7.10    2.70
 -17  11  -1    8.40    1.90
  17 -11   1   10.00    2.40
  17 -11   1    6.20    2.70
 -11  -6   1    5.90    2.60
 -11  -6   1    6.90    2.40
 -11  -6   1    7.60    2.80
  -6  17   1    8.50    2.50
 -17  12  -1   10.10    2.60
   5 -17  -1    6.20    2.30
 -17  12  -1    9.90    1.70
   5 -17  -1    7.30    2.30
 -17  12  -1    7.90    1.60
  12   5  -1    8.50    2.60
  17 -12   1    8.10    3.00
  17 -12   1    6.90    2.40
 -12  -5   1    8.20    2.60
 -12  -5   1    7.00    2.30
 -12  -5   1    8.90    2.80
  -5  17   1   10.20    2.50
 -17  13  -1    4.00    1.40
   4 -17  -1    3.40    2.80
   4 -17  -1    5.10    2.40
   4 -17  -1    4.30    2.50
  13   4  -1    5.30    2.60
 -17  13  -1    2.70    2.60
 -13  -4   1   10.90    2.90
  17 -13   1    1.60    2.40
 -13  -4   1   10.80    2.80
  17 -13   1    4.50    2.10
  -4  17   1    4.50    2.10
 -13  -4   1    3.30    2.40
   3 -17  -1   18.40    2.80
 -17  14  -1   25.60    2.20
   3 -17  -1   19.70    3.00
   3 -17  -1   17.10    2.90
  14   3  -1   17.40    3.00
 -17  14  -1   16.60    3.20
  -3  17   1   22.50    3.10
 -14  -3   1   19.80    3.30
 -14  -3   1   17.80    2.90
  17 -14   1   22.30    3.60
  17 -14   1   22.40    3.00
 -14  -3   1   20.10    3.20
 -17  15  -1    3.50    2.60
   2 -17  -1    5.10    2.10
  15   2  -1    3.90    2.80
   2 -17  -1    0.40    2.40
   2 -17  -1    1.50    2.40
 -17  15  -1    1.60    1.20
 -15  -2   1    1.00    2.70
  17 -15   1   10.10    3.10
  -2  17   1    7.30    2.30
  17 -15   1    3.90    2.00
  16   1  -1    8.60    2.90
 -17  16  -1   14.60    2.70
   1 -17  -1   11.00    2.60
   1 -17  -1    9.00    2.80
   1 -17  -1   14.70    2.80
 -16  -1   1    8.30    4.50
  17 -16   1    9.90    2.90
  17 -16   1    9.20    2.30
 -16  -1   1   12.70    2.90
  -1  17   1   14.40    2.80
   0 -17  -1    3.80    2.40
   0 -17  -1    8.70    2.60
 -17  17  -1    4.30    0.90
  17   0  -1    5.90    3.00
 -17  17  -1    4.00    2.70
   0 -17  -1    5.80    2.70
 -17   0   1   -1.00    2.90
 -17   0   1    1.10    2.80
  17 -17   1    2.60    2.90
   0  17   1    4.90    2.60
 -17  18  -1   39.00    4.60
 -17  18  -1   34.50    1.80
  18  -1  -1   47.30    5.10
  -1 -17  -1   32.60    3.80
 -17  18  -1   32.80    1.90
  -1 -17  -1   39.50    6.40
  17 -18   1   37.10    4.50
   1  17   1   40.70    4.30
 -18   1   1   36.10    4.00
 -18   1   1   42.30    4.90
  -2 -17  -1    4.20    2.60
  -2 -17  -1    8.30    3.10
 -17  19  -1    6.40    2.70
 -19   2   1    1.00    2.70
   2  17   1    4.80    2.70
  17 -19   1    6.20    3.20
 -19   2   1    9.20    3.00
 -17  20  -1   21.40    3.50
  -3 -17  -1   18.90    3.50
  -3 -17  -1   15.40    3.10
  20  -3  -1   29.30    4.40
 -20   3   1   19.40    3.00
 -20   3   1   25.90    3.60
  17 -20   1   24.90    4.00
   3  17   1   21.90    3.30
  21  -4  -1    4.10    3.40
  -4 -17  -1    1.80    3.00
 -17  21  -1    5.30    3.10
  -4 -17  -1    2.10    3.40
 -21   4   1    0.50    2.80
  17 -21   1    4.00    3.00
 -21   4   1    6.10    3.00
   4  17   1   -1.50    2.40
  21 -18  -1    6.50    3.30
 -18  -3  -1   17.70    3.60
 -18  -3  -1    8.30    3.10
  18   3   1   16.20    3.40
   3 -21   1   12.90    3.40
 -21  18   1    7.40    3.60
   3 -21   1    9.90    2.90
 -18  -2  -1    1.60    2.60
  20 -18  -1    0.70    3.20
  -2  20  -1    3.50    2.70
 -18  -2  -1   -1.50    2.90
   2 -20   1   -0.60    2.60
 -20  18   1   -3.00    3.00
  18   2   1    5.90    3.00
 -20  18   1   -2.20    1.40
  19 -18  -1    8.60    3.20
 -18  -1  -1    8.80    3.20
  -1  19  -1   12.40    3.00
 -18  -1  -1    5.50    3.00
   1 -19   1    5.70    4.40
  18   1   1    8.50    3.20
 -19  18   1    7.90    3.00
 -19  18   1    4.00    1.40
   0  18  -1    1.10    2.60
 -18   0  -1    4.50    2.80
  18 -18  -1    2.60    2.70
 -18   0  -1   -3.00    2.40
 -18  18   1    2.20    2.50
   0 -18   1   -0.40    2.50
  18   0   1    3.50    2.90
 -18  18   1   -0.20    1.30
   0 -18   1    2.10    2.70
  17 -18  -1   27.50    4.00
   1  17  -1   19.90    2.90
 -18   1  -1   15.00    3.10
 -18   1  -1   17.50    3.40
 -17  18   1   18.30    3.20
  18  -1   1   27.10    4.10
  -1 -17   1   17.20    3.00
 -17  18   1   16.40    2.30
  -1 -17   1   19.00    3.30
 -18   2  -1   -0.20    2.50
  16 -18  -1    5.80    2.60
 -18   2  -1   -0.30    2.50
   2  16  -1    3.90    2.50
 -16  18   1   -0.80    1.30
  18  -2   1   -2.30    3.10
  -2 -16   1    1.20    2.70
  -2 -16   1   -2.00    2.30
 -16  18   1    2.10    2.30
  15 -18  -1    7.00    2.90
   3  15  -1   11.80    2.80
 -18   3  -1   11.00    2.70
 -18   3  -1   16.00    3.10
  -3 -15   1   10.70    2.90
 -15  18   1    9.60    1.60
  18  -3   1   12.00    3.80
 -15  18   1   10.00    2.50
  -3 -15   1   13.90    3.00
  14 -18  -1    3.40    2.60
 -18   4  -1    2.90    2.50
  14 -18  -1    2.10    2.70
   4  14  -1    5.70    2.60
 -18   4  -1    7.60    2.40
  14 -18  -1    7.30    1.60
  -4 -14   1    1.40    2.70
  -4 -14   1    4.90    2.40
 -14  18   1    5.40    1.50
  -4 -14   1    4.70    2.60
  18  -4   1    7.50    3.40
 -14  18   1    3.60    2.50
 -18   5  -1   12.30    3.40
  13 -18  -1   17.50    2.20
 -18   5  -1   17.30    2.70
  13 -18  -1   11.80    2.30
  13 -18  -1   19.00    3.30
   5  13  -1   13.40    2.60
 -13  18   1   19.10    3.10
  18  -5   1   19.00    4.00
 -13  18   1   17.60    2.30
 -13  18   1   13.40    2.00
  -5 -13   1   15.10    2.90
  -5 -13   1   15.10    2.90
  -5 -13   1   13.50    3.30
  12 -18  -1   45.60    4.20
   6  12  -1   42.50    4.10
 -18   6  -1   41.10    4.10
  12 -18  -1   40.20    3.80
 -18   6  -1   42.50    3.70
  12 -18  -1   39.70    3.10
  -6 -12   1   42.10    3.80
 -12  18   1   39.20    2.70
 -12  18   1   45.80    3.80
  18  -6   1   57.09    5.80
  -6 -12   1   46.40    5.00
  -6 -12   1   38.60    4.10
   7  11  -1   49.20    4.30
  11 -18  -1   40.90    3.20
  11 -18  -1   39.70    3.80
 -18   7  -1   40.90    4.20
 -18   7  -1   51.69    3.80
  11 -18  -1   44.70    4.50
 -11  18   1   43.40    2.80
  -7 -11   1   50.79    4.30
 -11  18   1   50.89    4.30
  -7 -11   1   50.19    4.50
  18  -7   1   46.00    4.60
   8  10  -1   40.10    3.80
  10 -18  -1   37.40    3.90
  10 -18  -1   32.50    3.60
 -18   8  -1   38.20    4.00
  10 -18  -1   36.40    3.30
 -18   8  -1   38.80    3.60
  -8 -10   1   43.80    3.80
  18  -8   1   42.60    4.40
 -10  18   1   44.00    4.10
  -8 -10   1   39.90    4.00
 -18   9  -1   61.99    4.60
   9   9  -1   65.59    4.90
   9 -18  -1   65.29    4.90
   9 -18  -1   55.09    3.90
   9 -18  -1   58.89    4.10
 -18   9  -1   51.29    4.50
  -9  -9   1   63.09    5.00
  -9  -9   1   64.39    4.60
  -9  18   1   59.79    4.30
  18  -9   1   64.69    5.20
  -9  -9   1   71.99    4.80
   8 -18  -1   53.19    4.30
 -18  10  -1   54.29    3.70
 -18  10  -1   54.49    4.60
   8 -18  -1   66.99    4.80
   8 -18  -1   60.19    4.30
  10   8  -1   54.79    4.40
 -10  -8   1   57.89    4.40
 -10  -8   1   70.39    5.00
  -8  18   1   62.39    4.60
 -10  -8   1   68.39    4.70
  18 -10   1   62.99    5.10
   7 -18  -1   57.49    4.10
  11   7  -1   57.09    4.50
 -18  11  -1   59.69    4.60
   7 -18  -1   54.49    4.70
   7 -18  -1   60.39    4.40
 -18  11  -1   58.09    3.70
 -11  -7   1   67.59    4.60
  18 -11   1   57.49    4.90
  -7  18   1   63.29    4.50
 -11  -7   1   59.99    4.40
 -11  -7   1   69.29    5.10
   6 -18  -1   54.19    4.20
   6 -18  -1   51.09    4.30
 -18  12  -1   55.79    3.40
   6 -18  -1   54.89    4.10
 -18  12  -1   53.69    4.80
  12   6  -1   50.49    4.40
  18 -12   1   58.89    5.00
 -12  -6   1   70.29    7.10
 -12  -6   1   54.29    4.80
  -6  18   1   59.69    4.50
 -12  -6   1   58.69    4.90
   5 -18  -1   39.40    4.10
   5 -18  -1   33.60    3.40
 -18  13  -1   36.30    2.80
   5 -18  -1   32.60    3.60
 -18  13  -1   39.20    2.90
 -18  13  -1   40.50    4.40
  13   5  -1   38.20    4.40
 -13  -5   1   37.80    3.80
  -5  18   1   37.90    3.50
 -13  -5   1   34.90    3.70
  18 -13   1   39.80    4.90
 -13  -5   1   34.70    5.50
 -18  14  -1   16.40    2.50
   4 -18  -1   22.80    2.90
  14   4  -1   19.50    3.10
 -18  14  -1   14.50    2.80
 -18  14  -1   16.10    2.20
   4 -18  -1   17.40    2.90
  -4  18   1   24.20    3.00
  18 -14   1   26.70    3.90
 -14  -4   1   19.10    3.20
  15   3  -1   47.60    4.30
 -18  15  -1   43.70    2.80
   3 -18  -1   44.50    4.30
   3 -18  -1   50.59    4.00
 -18  15  -1   50.19    4.70
 -18  15  -1   50.39    3.00
   3 -18  -1   43.90    3.80
  18 -15   1   57.49    5.40
  -3  18   1   51.99    4.30
 -15  -3   1   46.50    4.40
 -15  -3   1   57.49    4.80
 -18  16  -1   33.90    4.00
 -18  16  -1   40.90    2.30
   2 -18  -1   39.20    4.00
  16   2  -1   38.40    4.20
   2 -18  -1   33.90    3.70
   2 -18  -1   35.70    4.20
 -16  -2   1   32.90    4.10
 -16  -2   1   37.00    4.00
  -2  18   1   41.40    4.10
  18 -16   1   28.40    3.90
   1 -18  -1   38.50    4.40
   1 -18  -1   42.60    4.40
 -18  17  -1   37.90    2.20
 -18  17  -1   36.00    4.50
  17   1  -1   50.19    5.10
  18 -17   1   41.20    5.00
  -1  18   1   35.40    3.80
 -17  -1   1   34.30    4.60
 -17  -1   1   45.70    4.80
   0 -18  -1   25.60    3.50
 -18  18  -1   19.60    1.60
  18   0  -1   19.20    3.90
 -18  18  -1   26.10    3.60
   0  18   1   32.70    4.00
 -18   0   1   28.60    3.90
  18 -18   1   24.30    3.80
 -18   0   1   30.90    4.00
  19  -1  -1   19.50    4.50
 -18  19  -1   12.20    3.30
  -1 -18  -1   16.10    3.30
  -1 -18  -1    9.60    2.70
 -19   1   1    7.80    2.90
   1  18   1   16.80    3.10
 -19   1   1    8.70    2.80
  18 -19   1    8.30    3.40
  -2 -18  -1    7.70    3.00
 -18  20  -1    8.50    3.20
  20  -2  -1   13.50    3.30
 -20   2   1    8.20    3.50
  18 -20   1    8.10    3.80
 -20   2   1    7.30    3.00
   2  18   1    8.00    2.70
  21  -3  -1    2.10    3.10
  -3 -18  -1   -1.40    2.90
 -18  21  -1    4.30    2.80
  -3 -18  -1    4.00    2.70
 -21   3   1   -1.30    2.90
 -21   3   1    5.00    3.20
  18 -21   1    0.00    3.10
   3  18   1    4.30    3.10
 -19  -1  -1   -0.80    3.00
  20 -19  -1    6.60    3.20
 -19  -1  -1    3.10    2.70
  -1  20  -1    6.20    3.20
 -20  19   1    4.60    3.30
   1 -20   1   -0.80    2.50
  19   1   1    5.50    3.30
   1 -20   1   -0.30    2.50
 -19   0  -1   46.60    5.20
 -19   0  -1   37.50    4.30
  19 -19  -1   46.50    5.00
   0  19  -1   43.60    4.50
   0 -19   1   43.10    4.50
   0 -19   1   49.99    4.70
  19   0   1   44.60    4.90
 -19  19   1   35.40    2.60
 -19  19   1   42.60    4.50
 -19   1  -1    6.10    2.70
   1  18  -1    5.40    2.70
  18 -19  -1   12.40    3.50
 -19   1  -1   11.70    3.20
  19  -1   1   11.70    3.70
  -1 -18   1    5.70    2.60
 -18  19   1    8.50    2.90
 -18  19   1    6.40    1.50
 -19   2  -1   54.59    4.40
 -19   2  -1   46.40    5.40
   2  17  -1   52.19    4.70
  17 -19  -1   60.49    5.70
  -2 -17   1   57.89    4.90
 -17  19   1   49.90    3.00
  19  -2   1   57.79    5.70
 -17  19   1   52.49    5.10
  -2 -17   1   50.19    4.40
   3  16  -1    9.40    2.70
 -19   3  -1   19.00    3.30
  16 -19  -1   11.40    3.40
 -19   3  -1   15.20    3.20
  19  -3   1   20.80    3.70
 -16  19   1   18.20    3.30
 -16  19   1   13.60    1.70
  -3 -16   1   10.60    2.80
  15 -19  -1   38.10    2.80
   4  15  -1   43.10    4.30
 -19   4  -1   36.30    3.60
 -19   4  -1   31.80    3.90
  15 -19  -1   41.80    4.80
  19  -4   1   31.40    4.20
  -4 -15   1   32.60    4.40
 -15  19   1   35.90    2.80
 -15  19   1   34.20    4.00
  14 -19  -1   10.50    3.30
  14 -19  -1   12.30    1.80
 -19   5  -1   13.00    3.00
 -19   5  -1    9.80    2.40
   5  14  -1   11.20    2.90
  -5 -14   1   13.30    2.50
 -14  19   1    9.00    2.10
  -5 -14   1    7.50    2.70
  -5 -14   1   11.20    2.60
  19  -5   1   11.60    3.20
 -14  19   1   16.20    2.20
 -14  19   1    8.50    3.00
  13 -19  -1   14.00    3.20
   6  13  -1   18.20    2.80
 -19   6  -1   16.60    2.70
 -19   6  -1   14.90    3.20
  13 -19  -1   14.30    2.90
  13 -19  -1   19.50    2.30
  -6 -13   1   25.20    3.20
  -6 -13   1   18.80    3.10
  -6 -13   1   20.80    3.20
 -13  19   1   19.60    2.10
  19  -6   1   18.40    3.40
 -13  19   1   19.30    3.20
  12 -19  -1    2.50    2.40
 -19   7  -1    2.90    2.20
   7  12  -1    4.50    2.60
  12 -19  -1    4.40    1.50
  12 -19  -1    2.30    2.10
 -12  19   1    2.70    1.40
 -12  19   1    5.90    2.50
  -7 -12   1    5.30    2.20
  -7 -12   1    6.30    2.60
  -7 -12   1    4.20    2.30
  19  -7   1    1.70    2.70
  11 -19  -1   38.00    4.00
  11 -19  -1   41.70    3.20
 -19   8  -1   37.20    4.60
   8  11  -1   39.80    3.80
 -19   8  -1   44.00    3.60
  11 -19  -1   35.30    3.40
  -8 -11   1   46.30    4.20
  -8 -11   1   47.60    4.20
  19  -8   1   41.40    4.50
  -8 -11   1   42.30    3.80
 -11  19   1   47.20    3.80
  10 -19  -1    0.30    2.20
 -19   9  -1    2.00    2.50
  10 -19  -1    3.50    1.70
   9  10  -1    8.10    2.40
 -19   9  -1    4.50    1.90
  10 -19  -1    2.40    2.00
 -10  19   1    1.00    1.90
  -9 -10   1    6.40    2.60
  -9 -10   1    8.70    2.50
  19  -9   1    1.00    2.60
  -9 -10   1    4.50    2.60
  10   9  -1   -0.20    2.30
   9 -19  -1   -0.70    1.60
   9 -19  -1   -0.30    2.40
   9 -19  -1   -2.30    1.80
 -19  10  -1    2.10    2.50
 -19  10  -1   -4.10    1.70
 -10  -9   1    4.00    2.30
  -9  19   1    1.00    1.90
  19 -10   1   -2.20    2.50
 -10  -9   1    2.30    2.80
 -10  -9   1    2.30    2.50
   8 -19  -1    7.40    2.40
   8 -19  -1    2.20    2.10
 -19  11  -1    1.10    2.80
  11   8  -1    5.90    2.60
   8 -19  -1    5.90    2.10
 -19  11  -1    4.60    1.80
 -11  -8   1    4.00    2.60
 -11  -8   1    7.70    2.40
 -11  -8   1    5.30    2.90
  -8  19   1    6.20    2.10
  19 -11   1    3.10    3.10
   7 -19  -1   -4.50    1.90
  12   7  -1   -0.70    2.10
   7 -19  -1   -2.80    1.90
   7 -19  -1    0.60    2.10
 -19  12  -1   -3.20    1.50
 -12  -7   1   -4.80    2.30
 -12  -7   1    1.20    2.20
  -7  19   1   -0.10    2.30
 -12  -7   1    0.70    2.00
 -19  13  -1    7.90    2.60
  13   6  -1    9.50    2.60
   6 -19  -1    5.40    2.40
   6 -19  -1    9.10    2.70
 -19  13  -1    7.90    1.70
   6 -19  -1    8.70    2.10
 -13  -6   1   10.20    2.90
  -6  19   1   11.20    2.50
 -13  -6   1    6.20    2.70
  19 -13   1    5.20    3.10
 -19  14  -1   -2.00    1.30
  14   5  -1    5.40    2.50
   5 -19  -1    0.00    2.10
   5 -19  -1    1.30    1.90
 -19  14  -1   -0.40    2.20
 -19  14  -1    2.90    1.40
   5 -19  -1    0.10    2.10
 -14  -5   1   -4.70    2.30
  -5  19   1    1.80    2.30
  19 -14   1   -3.60    2.40
 -14  -5   1    0.20    2.60
   4 -19  -1    2.30    2.20
  15   4  -1    3.50    2.50
 -19  15  -1    2.50    2.50
   4 -19  -1    4.00    2.40
  19 -15   1    4.30    3.10
  -4  19   1    4.50    2.50
 -15  -4   1    2.20    2.70
 -15  -4   1   -1.50    2.90
   3 -19  -1   31.30    3.60
 -19  16  -1   23.40    2.20
   3 -19  -1   28.30    3.90
  16   3  -1   35.70    4.10
 -19  16  -1   27.80    3.90
  19 -16   1   30.00    4.30
 -16  -3   1   38.80    4.50
  -3  19   1   36.30    4.00
 -16  -3   1   19.20    3.30
   2 -19  -1    3.90    2.70
  17   2  -1   10.00    3.20
 -19  17  -1    3.90    2.50
  19 -17   1    7.10    3.00
 -17  -2   1    2.70    2.70
  -2  19   1    1.70    2.30
 -17  -2   1    9.90    3.20
  18   1  -1   12.30    3.40
   1 -19  -1    7.90    2.70
 -19  18  -1    7.40    2.90
   1 -19  -1   12.50    3.70
 -18  -1   1   13.80    3.40
  -1  19   1   11.50    3.00
  19 -18   1   12.90    3.30
 -18  -1   1    7.90    3.20
 -19  19  -1   -2.40    2.80
   0 -19  -1   -1.70    2.50
  19   0  -1    1.00    3.10
   0  19   1   -1.80    2.70
 -19   0   1   -1.40    2.80
 -19   0   1   -5.90    2.80
  19 -19   1    1.90    3.00
  -1 -19  -1    7.60    2.90
  -1 -19  -1    8.90    3.10
 -19  20  -1   10.20    3.30
  20  -1  -1   10.90    3.50
   1  19   1   10.30    2.90
  19 -20   1    8.20    4.00
 -20   1   1    8.70    3.40
 -20   1   1   16.80    3.50
  19 -20  -1    8.50    3.40
   1  19  -1    2.80    2.80
 -20   1  -1    4.70    3.00
 -20   1  -1   -0.60    2.50
  20  -1   1    7.30    3.60
  -1 -19   1    0.10    2.90
  -1 -19   1    3.80    2.80
 -20   2  -1   -3.10    2.50
  18 -20  -1   -1.70    2.60
   2  18  -1   -1.50    2.70
 -20   2  -1   -2.80    2.90
 -18  20   1   -1.00    2.40
  -2 -18   1    0.00    2.80
  -2 -18   1   -2.60    2.80
  20  -2   1    3.60    3.10
 -20   3  -1    8.10    3.00
  17 -20  -1    9.40    3.10
 -20   3  -1    9.20    2.90
   3  17  -1    9.00    2.90
  -3 -17   1    7.10    3.10
  -3 -17   1    4.90    4.20
 -17  20   1    6.80    2.80
 -17  20   1    4.90    1.40
  20  -3   1    6.70    3.10
 -20   4  -1   -3.10    3.00
 -20   4  -1    0.90    4.60
  16 -20  -1   -3.60    2.90
   4  16  -1   -4.50    2.50
 -16  20   1   -5.10    2.60
  -4 -16   1   -4.00    2.40
 -16  20   1   -0.20    1.30
  20  -4   1   -4.00    3.10
  -4 -16   1   -1.80    2.80
 -20   5  -1    0.70    2.40
  15 -20  -1    3.10    3.00
 -20   5  -1    1.10    2.60
   5  15  -1    0.90    2.60
  15 -20  -1    3.20    1.50
 -15  20   1    4.20    2.60
  20  -5   1    3.10    2.90
  -5 -15   1    3.00    2.40
 -15  20   1    3.30    1.40
  -5 -15   1   -1.70    2.40
   6  14  -1    5.50    2.70
 -20   6  -1    3.40    2.40
  14 -20  -1    4.90    1.50
  14 -20  -1   -2.10    2.70
 -20   6  -1    4.00    3.00
  -6 -14   1    5.40    2.30
  -6 -14   1   -0.40    2.90
  20  -6   1    1.60    2.90
 -14  20   1    2.10    2.50
 -14  20   1    7.50    1.60
 -20   7  -1    3.30    2.30
   7  13  -1    3.00    2.30
  13 -20  -1    6.50    1.60
  13 -20  -1    2.60    2.90
 -20   7  -1    3.10    3.00
  20  -7   1    6.80    3.00
  -7 -13   1    8.40    2.70
 -13  20   1    4.20    2.30
  -7 -13   1    0.60    2.50
  12 -20  -1   11.40    2.00
 -20   8  -1    7.30    2.90
  12 -20  -1    9.40    3.10
   8  12  -1   11.60    2.70
 -20   8  -1    7.10    2.30
  -8 -12   1    7.00    2.80
  20  -8   1   10.10    3.50
 -12  20   1   11.70    2.60
  -8 -12   1   16.50    3.00
  11 -20  -1   12.50    2.10
  11 -20  -1    8.90    2.70
 -20   9  -1   12.10    2.20
   9  11  -1   10.80    2.70
  20  -9   1    9.90    3.40
 -11  20   1    6.40    2.30
  -9 -11   1   12.50    3.20
  -9 -11   1   12.90    2.80
 -20  10  -1    5.00    2.00
  10 -20  -1    2.40    2.40
 -20  10  -1    7.00    3.30
  10 -20  -1    6.50    1.90
  10  10  -1    5.40    2.40
 -10 -10   1    6.20    2.30
 -10 -10   1    4.80    2.60
  20 -10   1    6.50    3.10
 -10  20   1    6.80    2.60
 -20  11  -1    2.90    1.80
   9 -20  -1    4.50    1.90
   9 -20  -1   -0.70    2.30
  11   9  -1   -0.50    2.10
 -20  11  -1   -2.50    2.60
  -9  20   1   -0.60    2.30
 -11  -9   1    3.10    2.30
 -11  -9   1    2.50    2.60
  20 -11   1   -0.10    3.00
   8 -20  -1   10.30    2.30
 -20  12  -1    6.50    3.00
   8 -20  -1    9.40    2.80
  12   8  -1   12.70    3.00
 -12  -8   1    8.90    3.20
  20 -12   1   10.30    3.10
  -8  20   1    7.80    2.40
 -12  -8   1   16.50    3.10
   7 -20  -1    9.40    2.20
 -20  13  -1    7.40    1.80
 -20  13  -1    7.80    2.70
  13   7  -1   12.30    2.80
   7 -20  -1    9.60    2.60
  -7  20   1    9.00    2.60
 -13  -7   1    8.90    2.90
 -13  -7   1    8.50    2.60
  20 -13   1    9.10    3.10
   6 -20  -1    3.30    2.40
   6 -20  -1    2.80    2.10
  14   6  -1    9.00    3.00
 -20  14  -1    0.70    2.80
 -20  14  -1    0.60    1.50
 -14  -6   1    9.30    2.70
  20 -14   1    4.10    2.80
  -6  20   1    3.30    2.40
 -14  -6   1   -1.10    2.90
   5 -20  -1   17.70    2.80
   5 -20  -1   19.10    3.20
 -20  15  -1   19.70    3.60
  20 -15   1   18.60    3.40
  -5  20   1   18.30    3.00
 -15  -5   1   22.40    3.30
 -15  -5   1   18.00    3.20
 -20  16  -1   10.50    1.50
 -20  16  -1   14.30    3.00
  16   4  -1   15.50    3.10
   4 -20  -1   17.30    2.90
   4 -20  -1    9.40    2.70
 -16  -4   1   16.50    3.50
  20 -16   1   11.20    3.40
 -16  -4   1   11.50    3.40
  -4  20   1   13.10    3.00
   3 -20  -1   31.50    4.10
   3 -20  -1   25.50    3.80
  17   3  -1   26.60    3.80
 -20  17  -1   21.00    2.10
 -20  17  -1   20.50    3.80
 -17  -3   1   34.20    4.10
  20 -17   1   20.40    3.70
 -17  -3   1   22.90    3.80
  -3  20   1   20.80    3.10
   2 -20  -1    4.30    3.00
   2 -20  -1    8.70    2.90
 -20  18  -1   14.20    3.40
  20 -18   1   10.00    3.40
 -18  -2   1    6.40    2.90
 -18  -2   1    7.60    3.00
  -2  20   1    6.70    3.00
   1 -20  -1    9.80    2.90
   1 -20  -1   13.90    3.30
  19   1  -1   12.10    3.30
 -20  19  -1    8.20    3.20
 -19  -1   1    6.30    3.30
 -19  -1   1    5.30    3.00
  -1  20   1    9.60    3.10
 -21   3  -1    9.30    3.50
   3  18  -1   18.50    4.70
 -21   3  -1    9.40    3.10
  21  -3   1   10.00    3.80
  -3 -18   1    5.60    3.20
 -18  21   1   11.80    3.40
  -3 -18   1   13.80    3.40
 -21   4  -1   18.30    3.50
   4  17  -1   16.30    3.40
  17 -21  -1   16.80    3.50
 -21   4  -1   12.10    3.10
  -4 -17   1   15.00    3.10
 -17  21   1   16.60    3.20
  21  -4   1   16.80    3.70
  -4 -17   1   21.80    3.70
 -21   5  -1   13.00    2.90
   5  16  -1   14.30    3.20
  16 -21  -1   19.00    3.70
 -21   5  -1   12.90    3.70
  21  -5   1   12.30    3.90
 -16  21   1   10.50    1.70
 -16  21   1   15.80    3.50
  -5 -16   1   12.60    3.70
 -21   6  -1   15.00    2.90
 -21   6  -1    8.90    3.30
  15 -21  -1   15.60    3.60
   6  15  -1   14.80    3.20
  15 -21  -1   15.30    2.20
 -15  21   1   18.50    2.40
  21  -6   1   12.00    3.20
 -15  21   1   13.40    3.00
  -6 -15   1   17.50    4.70
  -6 -15   1   10.90    3.40
  14 -21  -1   -0.10    2.70
 -21   7  -1   -0.30    2.30
  14 -21  -1    3.20    1.50
   7  14  -1    4.20    2.70
 -21   7  -1    2.30    2.70
  -7 -14   1    1.10    2.50
 -14  21   1    3.00    1.50
  21  -7   1    2.40    3.40
 -14  21   1    0.70    2.70
  -7 -14   1   -5.40    2.80
 -21   8  -1    3.60    2.40
  13 -21  -1    2.50    2.90
  13 -21  -1    7.20    1.70
 -21   8  -1    6.10    3.30
   8  13  -1    2.00    2.70
 -13  21   1    4.60    2.70
  21  -8   1    3.80    3.00
  -8 -13   1    3.10    2.80
  -8 -13   1    1.80    2.70
  12 -21  -1   -3.20    2.50
 -21   9  -1   -3.10    2.00
   9  12  -1   -2.00    2.50
 -21   9  -1   -1.90    2.50
  12 -21  -1    1.30    1.60
 -12  21   1   -2.20    2.20
  -9 -12   1   -0.50    2.60
  21  -9   1   -2.80    3.10
 -21  10  -1   11.10    3.50
  11 -21  -1    8.50    2.70
 -21  10  -1    6.50    2.30
  10  11  -1   10.80    2.70
  11 -21  -1   10.60    2.10
 -10 -11   1    9.70    2.90
  21 -10   1    8.90    3.10
 -10 -11   1    8.10    2.60
 -11  21   1    6.90    2.80
 -21  11  -1    5.20    3.10
  10 -21  -1    8.90    2.00
  10 -21  -1    7.70    2.90
  11  10  -1    6.00    2.80
 -21  11  -1    4.90    2.00
  21 -11   1    5.30    3.40
 -11 -10   1   10.10    2.80
 -11 -10   1    8.00    2.90
 -10  21   1    3.10    2.50
   9 -21  -1   -1.40    2.30
  12   9  -1    5.30    2.90
 -21  12  -1   -0.50    1.80
   9 -21  -1    2.90    1.90
 -21  12  -1   -1.90    3.40
  21 -12   1    1.30    2.90
 -12  -9   1    3.40    2.60
 -12  -9   1    2.60    2.30
  -9  21   1    0.70    2.60
   8 -21  -1    8.60    2.20
   8 -21  -1    6.30    2.80
  13   8  -1   11.90    3.10
 -13  -8   1    7.80    3.00
  21 -13   1    7.80    3.20
 -13  -8   1    6.40    3.20
  -8  21   1    3.60    2.30
   7 -21  -1    1.90    2.10
 -21  14  -1   -2.60    3.20
  14   7  -1    1.50    2.60
   7 -21  -1   -1.60    2.60
 -21  14  -1   -2.70    1.60
  -7  21   1   -1.00    2.20
 -14  -7   1   -2.80    2.50
  21 -14   1    0.10    2.80
   6 -21  -1   -2.50    2.90
 -21  15  -1    4.50    2.60
   6 -21  -1    7.50    2.40
  15   6  -1    4.70    2.70
 -15  -6   1    5.00    3.00
  21 -15   1    6.70    3.50
  -6  21   1    7.60    2.50
 -15  -6   1    0.30    2.70
  16   5  -1   10.00    3.20
 -21  16  -1    0.60    3.10
   5 -21  -1    3.70    2.40
  21 -16   1    1.20    3.30
 -16  -5   1   -1.70    2.70
  -5  21   1    0.70    2.40
 -16  -5   1    3.30    2.60
   4 -21  -1    4.00    2.50
 -21  17  -1    4.00    2.90
   4 -21  -1    1.30    2.50
  17   4  -1    5.20    3.00
  21 -17   1   10.90    3.50
 -17  -4   1    3.70    3.00
  -4  21   1    1.70    2.80
 -17  -4   1    0.00    2.70
   3 -21  -1    3.50    2.90
   3 -21  -1    3.50    2.60
  18   3  -1    8.90    3.90
 -21  18  -1    3.60    3.10
 -18  -3   1    2.90    3.30
 -18  -3   1   -0.80    3.10
  -3  21   1    3.50    2.90
  16 -22  -1    7.80    3.00
   6  16  -1    2.10    3.00
 -22   6  -1    1.10    2.50
 -22   6  -1    5.20    2.90
  22  -6   1   11.90    3.20
  -6 -16   1    2.60    2.80
 -16  22   1    3.90    2.70
   7  15  -1    4.30    2.60
  15 -22  -1   -2.50    4.40
 -22   7  -1    3.80    2.90
  22  -7   1    3.40    3.40
  -7 -15   1   -3.90    3.00
 -15  22   1    0.80    1.60
  -7 -15   1    0.30    2.70
 -15  22   1    3.10    3.00
   8  14  -1   10.80    2.90
 -22   8  -1    9.10    2.80
 -22   8  -1   12.80    3.60
  14 -22  -1   13.60    2.00
  -8 -14   1   14.40    2.90
 -14  22   1   11.40    1.90
  -8 -14   1    5.90    3.30
 -14  22   1   11.00    3.00
  22  -8   1    8.60    3.20
   9  13  -1   11.90    3.30
 -22   9  -1   10.00    3.50
 -22   9  -1   10.60    2.50
  13 -22  -1    8.80    1.90
 -13  22   1   12.00    3.10
  -9 -13   1    6.80    2.90
  22  -9   1    8.60    3.10
  -9 -13   1   12.20    3.00
  12 -22  -1   24.90    6.10
 -22  10  -1   18.50    2.70
  12 -22  -1   22.30    2.90
  10  12  -1   20.00    3.30
 -22  10  -1   21.40    3.90
 -10 -12   1   22.60    5.20
 -10 -12   1   16.20    3.40
 -12  22   1   16.50    3.00
  22 -10   1   22.80    4.30
  11 -22  -1   16.40    2.30
 -22  11  -1   16.30    2.60
 -22  11  -1   11.70    3.20
  22 -11   1   10.80    3.60
 -11 -11   1   18.50    3.40
 -11  22   1   17.60    3.20
  12  10  -1   22.00    3.20
 -22  12  -1   16.10    3.30
 -22  12  -1   15.00    2.40
  10 -22  -1   20.80    3.00
 -10  22   1   19.90    3.40
 -12 -10   1   14.90    3.30
  22 -12   1   17.60    3.70
 -22  13  -1   14.40    3.60
   9 -22  -1   13.10    3.60
  13   9  -1   18.20    3.50
 -22  13  -1   12.70    2.20
 -13  -9   1   14.60    3.30
  -9  22   1   12.00    3.10
 -13  -9   1   15.90    5.00
  22 -13   1    8.50    3.30
   8 -22  -1    4.30    3.00
 -22  14  -1    5.30    3.00
  14   8  -1    8.90    3.40
 -22  14  -1    5.20    3.50
  -8  22   1    5.90    2.90
 -14  -8   1    5.80    3.00
  22 -14   1   12.10    3.70
 -14  -8   1    7.30    4.70
  15   7  -1   27.60    4.10
   7 -22  -1   15.90    3.10
 -22  15  -1   13.40    3.40
 -22  15  -1   17.70    2.10
 -15  -7   1   20.90    4.00
  -7  22   1   15.50    3.30
  22 -15   1   23.20    4.30
  16   6  -1   15.30    3.30
 -22  16  -1    5.00    1.70
   6 -22  -1   11.40    2.70
 -22  16  -1   14.50    3.60
   6 -22  -1    7.20    2.70
  -6  22   1    7.90    3.10
  22 -16   1    8.90    3.40
 -16  -6   1    7.80    3.60
  -1   3  -2  240.18    9.10
  -2  -1  -2  256.27    9.20
   3  -2  -2  257.87    9.30
  -1   3  -2  230.88    9.10
  -2  -1  -2  247.48    9.20
   3  -2  -2  257.77    9.30
  -3   2   2  291.87    9.30
   2   1   2  250.37    9.10
   1  -3   2  279.37    9.10
  -3   2   2  286.97    9.30
   1  -3   2  261.97    9.10
   1  -3   2  278.07    9.10
   2   1   2  240.98    9.20
  -3   2   2  292.17    9.30
   2   1   2  290.27    9.30
  -3   2   2  290.47    9.20
  -2   0  -2   86.39    2.90
   2  -2  -2   71.19    3.10
  -2   0  -2   73.19    3.00
   2   0   2   76.59    3.00
  -2   2   2   86.59    3.40
  -2   2   2   83.59    2.90
   0  -2   2   78.79    2.80
   1   1  -2 1595.54   58.49
   0  -2  -2 1169.38   38.70
   0   2   2 1068.69   38.80
  -2   0   2 1184.68   38.60
   0   2   2 1168.18   38.60
   2  -2   2 1131.49   38.60
  -2   0   2 1148.19   38.60
  -2   3  -2  303.67   10.30
  -1  -2  -2  284.07   10.30
   3  -1  -2  292.47   10.40
  -1  -2  -2  323.07   10.30
  -1  -2  -2  322.37   10.40
   2  -3   2  295.17   10.10
  -3   1   2  314.37   10.50
   1   2   2  301.07   10.30
   2  -3   2  295.97   10.30
  -3   1   2  304.27   10.30
  -3   1   2  295.37   10.40
  -3   1   2  317.07   10.40
   1   2   2  275.77   10.30
   2  -3   2  267.97   10.20
   4  -2  -2 2328.67   78.49
  -2  -2  -2 2314.77   78.39
   4  -2  -2 2335.47   78.39
   4  -2  -2 2347.17   78.39
  -2  -2  -2 2271.77   78.39
  -2   4  -2 2253.87   78.29
   2   2   2 2383.36   78.39
  -4   2   2 2378.26   78.39
   2   2   2 2313.47   78.39
   2   2   2 2282.07   78.29
   2  -4   2 2282.97   78.29
  -4   2   2 2338.97   78.49
  -4   2   2 2398.96   78.59
  -4   2   2 2366.76   78.39
   5  -3  -2 2639.44   84.99
   5  -3  -2 2614.64   84.99
  -3  -2  -2 2604.94   85.09
  -3  -2  -2 2541.25   85.09
  -3  -2  -2 2569.74   84.99
  -2   5  -2 2516.75   84.99
   5  -3  -2 2566.44   85.19
  -5   3   2 2526.55   84.99
   3   2   2 2483.75   84.99
   3   2   2 2519.55   84.99
  -5   3   2 2554.54   85.19
   2  -5   2 2334.97   85.09
  -5   3   2 2536.35   85.09
   3   2   2 2492.65   85.09
   2  -5   2 2438.06   84.89
  -5   3   2 2443.16   85.09
  -1   4  -2  915.91   30.10
  -3  -1  -2  933.51   30.30
  -1   4  -2  922.91   30.20
   4  -3  -2  947.11   30.30
  -3  -1  -2  918.31   30.40
   4  -3  -2  951.20   30.40
   4  -3  -2  914.81   30.40
   4  -3  -2  930.31   30.20
  -3  -1  -2  902.11   30.20
   1  -4   2  846.62   30.20
  -4   3   2  864.71   30.30
   3   1   2  855.41   30.20
  -4   3   2  858.41   30.20
   3   1   2  867.81   30.50
  -4   3   2  869.81   30.30
   1  -4   2  846.42   30.10
   3   1   2  863.11   30.30
   1  -4   2  836.72   30.20
   0   3  -2 1145.09   38.60
  -3   0  -2 1142.39   38.60
  -3   0  -2 1164.68   38.70
   3  -3  -2 1157.98   38.80
  -3   0  -2 1137.89   38.80
   3  -3  -2 1161.98   38.80
   3  -3  -2 1091.99   38.70
   0   3  -2 1153.98   38.60
   0  -3   2 1131.39   38.70
   3   0   2 1127.29   38.60
   0  -3   2 1135.59   38.60
   0  -3   2 1151.48   38.60
  -3   3   2 1163.48   38.70
  -3   3   2 1150.68   38.80
  -3   3   2 1147.79   38.80
   3   0   2 1156.08   38.70
   3   0   2 1157.18   38.80
   1   2  -2  267.07    8.80
  -3   1  -2  277.27    8.70
   1   2  -2  238.48    8.70
  -3   1  -2  284.37    8.80
   2  -3  -2  224.88    8.80
  -3   1  -2  272.77    8.90
   3  -1   2  257.17    8.90
  -1  -2   2  251.27    8.80
  -2   3   2  241.88    8.80
  -2   3   2  249.68    8.80
  -2   3   2  253.77    8.80
  -1  -2   2  238.88    8.80
  -1  -2   2  247.38    8.80
   1  -3  -2  297.47   10.30
  -3   2  -2  299.87   10.20
   1  -3  -2  306.17   10.40
   1  -3  -2  263.77   10.30
  -3   2  -2  291.87   10.40
   2   1  -2  274.17   10.40
  -2  -1   2  322.67   10.40
  -1   3   2  281.17   10.30
   3  -2   2  283.67   10.20
   3  -2   2  292.77   10.30
  -1   3   2  315.17   10.30
   3  -2   2  321.77   10.40
  -2  -1   2  320.47   10.30
  -1   3   2  326.37   10.40
  -2  -1   2  303.87   10.40
   0  -3  -2 4016.30  131.09
   3   0  -2 3640.14  130.59
  -3   0   2 3558.84  130.49
   3  -3   2 3719.43  130.19
  -1  -3  -2  539.85   19.10
   4  -1  -2  541.25   19.20
   4  -1  -2  540.65   19.10
   4  -1  -2  548.75   19.10
  -1  -3  -2  538.95   19.10
  -3   4  -2  514.85   19.10
  -1  -3  -2  528.55   19.10
   3  -4   2  584.84   18.80
   1   3   2  576.44   19.10
   3  -4   2  570.04   19.00
   1   3   2  569.24   19.10
  -4   1   2  598.44   19.10
   1   3   2  572.34   19.10
  -4   1   2  593.04   19.10
  -4   1   2  561.24   19.20
   3  -4   2  556.04   19.10
  -3   5  -2  361.26   13.10
  -2  -3  -2  373.46   13.40
  -3   5  -2  372.16   13.30
   5  -2  -2  383.36   13.40
  -2  -3  -2  374.66   13.40
  -2  -3  -2  362.06   13.40
   5  -2  -2  373.26   13.40
   5  -2  -2  366.46   13.50
  -5   2   2  396.66   13.40
  -5   2   2  398.76   13.80
   3  -5   2  395.46   13.30
  -5   2   2  399.36   13.40
   2   3   2  407.56   13.50
   3  -5   2  400.26   13.10
  -5   2   2  408.46   13.60
   2   3   2  380.66   13.30
   2   3   2  390.36   13.40
   3  -5   2  383.56   13.60
   6  -3  -2   80.59    3.40
  -3   6  -2   80.09    3.00
   6  -3  -2   79.09    3.20
  -3  -3  -2   81.59    3.20
  -3   6  -2   79.49    2.80
  -3   6  -2   82.79    3.10
  -3  -3  -2   80.19    3.20
  -3  -3  -2   80.19    3.30
   3   3   2   68.29    3.10
  -6   3   2   72.69    3.30
   3  -6   2   65.99    3.70
   3   3   2   68.89    3.10
  -6   3   2   73.79    3.20
  -6   3   2   70.59    3.20
  -6   3   2   73.49    3.80
   3  -6   2   71.09    2.80
   3   3   2   75.49    3.30
   3  -6   2   69.39    3.00
  -3   7  -2  337.27   12.20
  -4  -3  -2  357.16   12.30
   7  -4  -2  338.37   12.30
   7  -4  -2  349.27   12.30
  -3   7  -2  341.97   12.20
  -3   7  -2  348.27   11.90
   7  -4  -2  345.97   12.50
  -4  -3  -2  349.77   12.30
  -4  -3  -2  336.37   12.40
   3  -7   2  351.56   12.00
   3  -7   2  347.27   12.20
  -7   4   2  329.47   12.40
  -7   4   2  354.06   13.20
   4   3   2  345.17   12.40
   3  -7   2  345.87   12.20
   4   3   2  346.67   12.30
   4   3   2  358.06   12.30
  -7   4   2  353.16   12.50
  -7   4   2  350.26   12.20
   6  -4  -2  123.89    4.80
  -2   6  -2  115.39    4.70
  -4  -2  -2  119.69    4.90
  -2   6  -2  119.59    4.80
   6  -4  -2  119.49    4.80
  -4  -2  -2  116.79    4.90
  -2   6  -2  118.79    4.60
  -4  -2  -2  119.39    4.80
   6  -4  -2  124.89    5.00
  -6   4   2  141.29    4.90
  -6   4   2  136.59    4.90
   2  -6   2  132.89    4.80
   4   2   2  133.39    4.90
   4   2   2  136.29    5.00
   2  -6   2  136.69    5.50
   2  -6   2  135.29    4.60
  -6   4   2  133.99    5.00
   4   2   2  130.09    4.80
   5  -4  -2 1329.67   44.90
  -4  -1  -2 1327.77   45.00
  -4  -1  -2 1290.87   44.90
   5  -4  -2 1326.67   45.00
   5  -4  -2 1359.86   45.00
  -1   5  -2 1314.77   44.80
  -4  -1  -2 1336.37   44.90
  -1   5  -2 1315.97   44.70
   4   1   2 1331.07   44.90
   1  -5   2 1312.87   44.70
  -5   4   2 1361.46   44.90
  -5   4   2 1335.37   45.00
  -5   4   2 1296.67   45.00
   4   1   2 1338.37   45.00
   1  -5   2 1308.27   45.00
   1  -5   2 1324.87   44.80
   4   1   2 1318.07   44.80
  -5   4   2 1325.87   44.90
  -4   0  -2  272.17    9.90
  -4   0  -2  273.57    9.70
   0   4  -2  276.17    9.70
   4  -4  -2  276.47    9.70
  -4   0  -2  292.77    9.80
   0   4  -2  281.17    9.70
   4  -4  -2  280.27    9.80
   4  -4  -2  267.17    9.80
   4   0   2  275.77    9.90
  -4   4   2  274.47    9.80
   0  -4   2  277.57    9.70
   0  -4   2  275.17    9.70
   4   0   2  290.17    9.70
   4   0   2  286.17   10.00
  -4   4   2  269.67    9.80
  -4   4   2  283.47    9.80
   0  -4   2  281.77    9.70
   3  -4  -2  876.71   30.30
   1   3  -2  852.71   30.20
  -4   1  -2  847.02   30.40
  -4   1  -2  841.22   30.10
   3  -4  -2  856.21   30.30
  -4   1  -2  880.21   30.30
   3  -4  -2  853.01   30.20
   1   3  -2  859.61   30.20
   4  -1   2  931.41   30.30
  -1  -3   2  915.51   30.20
  -1  -3   2  917.21   30.20
  -3   4   2  905.61   30.30
   4  -1   2  932.71   30.40
  -3   4   2  935.01   30.30
   4  -1   2  920.31   30.20
  -1  -3   2  922.01   30.30
  -3   4   2  922.51   30.30
  -4   2  -2 2359.16   78.59
   2   2  -2 2294.27   78.49
   2  -4  -2 2332.97   78.49
   2   2  -2 2364.36   78.49
   2  -4  -2 2336.27   78.49
  -4   2  -2 2374.96   78.49
  -2  -2   2 2316.67   78.49
  -2   4   2 2314.87   78.49
  -2  -2   2 2263.77   78.49
   4  -2   2 2377.96   78.49
   4  -2   2 2365.46   78.59
  -2   4   2 2285.77   78.49
   3   1  -2  578.84   19.10
   3   1  -2  603.94   19.10
   3   1  -2  544.65   19.10
  -4   3  -2  580.94   18.80
   1  -4  -2  570.04   19.10
   1  -4  -2  550.84   19.00
   1  -4  -2  592.84   19.10
  -4   3  -2  588.24   19.10
  -4   3  -2  578.04   19.10
   4  -3   2  544.65   19.00
  -3  -1   2  528.85   19.10
  -3  -1   2  528.65   19.10
  -3  -1   2  543.25   19.10
   4  -3   2  529.85   19.10
  -1   4   2  537.65   19.00
  -1   4   2  526.05   19.00
   4  -3   2  549.65   18.80
  -4   4  -2   24.50    1.40
   0  -4  -2   22.20    1.40
  -4   4  -2   24.50    1.40
   4   0  -2   21.70    1.50
   0  -4  -2   26.30    1.50
   0  -4  -2   26.10    1.40
  -4   4  -2   24.80    1.00
   4   0  -2   24.60    1.50
   4   0  -2   23.50    1.50
   0   4   2   23.70    1.40
  -4   0   2   22.90    1.60
  -4   0   2   19.70    1.50
   4  -4   2   22.50    1.50
   4  -4   2   23.60    1.30
   0   4   2   25.70    1.40
   0   4   2   27.00    1.40
  -4   0   2   23.40    1.40
  -4   5  -2 2371.36   81.79
  -4   5  -2 2355.16   81.89
   5  -1  -2 2392.86   81.89
   5  -1  -2 2430.46   81.99
   5  -1  -2 2476.75   81.89
  -1  -4  -2 2362.96   81.89
  -1  -4  -2 2398.46   81.89
  -1  -4  -2 2324.27   81.89
   1   4   2 2425.76   81.79
  -5   1   2 2424.16   82.09
   4  -5   2 2434.36   82.49
   4  -5   2 2458.35   81.79
  -5   1   2 2547.25   81.99
   1   4   2 2583.54   81.99
   4  -5   2 2465.25   81.59
   1   4   2 2432.46   81.89
  -4   6  -2  458.25   16.90
  -4   6  -2  474.55   16.90
  -2  -4  -2  459.45   17.00
   6  -2  -2  472.85   17.10
  -2  -4  -2  471.55   16.90
   6  -2  -2  481.55   17.00
  -2  -4  -2  475.55   16.90
   6  -2  -2  473.65   16.90
   2   4   2  496.95   16.90
   4  -6   2  513.75   16.60
   2   4   2  493.15   16.90
  -6   2   2  500.25   17.10
  -6   2   2  513.75   17.10
  -6   2   2  512.85   17.20
   2   4   2  506.55   17.00
   4  -6   2  496.65   16.90
   4  -6   2  507.55   17.70
   7  -3  -2  929.51   32.40
  -4   7  -2  918.41   32.30
   7  -3  -2  937.61   32.60
  -4   7  -2  896.71   31.90
   7  -3  -2  942.71   32.40
  -4   7  -2  918.91   32.20
  -3  -4  -2  914.21   32.30
  -3  -4  -2  925.51   32.40
  -3  -4  -2  903.11   32.40
   4  -7   2  963.40   32.10
   4  -7   2  947.41   32.40
   3   4   2  983.60   32.40
  -7   3   2  974.10   32.70
  -7   3   2  948.21   32.50
   3   4   2  993.50   32.50
  -7   3   2  976.00   32.60
   3   4   2  956.90   32.30
  -7   3   2  981.30   32.60
   4  -7   2  975.00   32.30
  -4   8  -2   11.70    1.30
   8  -4  -2   13.60    1.40
   8  -4  -2   13.50    1.60
  -4  -4  -2   12.50    1.50
  -4  -4  -2   15.30    1.60
  -4   8  -2   15.00    1.00
   8  -4  -2   12.90    1.40
  -4   8  -2   15.20    1.50
  -4  -4  -2   15.80    1.50
  -8   4   2   13.90    1.50
   4   4   2   15.10    1.50
   4  -8   2   11.90    1.50
   4  -8   2   15.20    1.40
   4   4   2   14.00    1.60
  -8   4   2   15.60    1.90
  -8   4   2   15.50    1.80
  -8   4   2   17.10    1.70
   4   4   2   14.10    1.50
   4  -8   2   15.40    1.20
  -4   9  -2  110.89    4.60
   9  -5  -2  121.59    4.80
  -4   9  -2  122.99    4.70
  -4   9  -2  127.19    4.40
  -5  -4  -2  128.09    4.90
  -5  -4  -2  122.79    5.00
   9  -5  -2  123.19    4.70
   9  -5  -2  123.49    5.70
   5   4   2  107.49    4.70
   5   4   2  114.69    5.90
   4  -9   2  107.39    4.70
  -9   5   2  111.39    4.60
   5   4   2  108.29    4.80
  -9   5   2  110.69    4.90
  -9   5   2  111.09    5.00
  -9   5   2  105.59    4.90
   4  -9   2  105.39    5.00
   8  -5  -2  134.49    5.50
   8  -5  -2  134.99    5.20
  -3   8  -2  131.99    5.20
   8  -5  -2  133.69    5.30
  -5  -3  -2  128.69    5.30
  -5  -3  -2  129.39    5.40
  -5  -3  -2  132.69    5.40
  -3   8  -2  136.29    4.90
   3  -8   2  135.59    5.20
  -8   5   2  134.89    5.40
   5   3   2  133.99    5.30
  -8   5   2  140.19    6.20
   5   3   2  132.19    5.30
  -8   5   2  139.99    5.40
   3  -8   2  127.79    5.20
  -8   5   2  131.59    5.40
   5   3   2  133.59    5.50
  -5  -2  -2 2222.18   74.79
   7  -5  -2 2200.88   74.79
  -5  -2  -2 2212.68   74.99
  -2   7  -2 2195.98   74.49
   7  -5  -2 2227.68   74.99
  -2   7  -2 2251.67   74.69
   7  -5  -2 2239.58   74.69
  -2   7  -2 2193.98   74.69
  -5  -2  -2 2139.89   74.69
  -7   5   2 2177.88   74.89
   5   2   2 2227.58   74.69
  -7   5   2 2245.18   75.19
   2  -7   2 2181.78   75.09
  -7   5   2 2248.58   74.89
   5   2   2 2259.07   74.89
   2  -7   2 2197.78   74.69
   5   2   2 2232.78   74.79
   2  -7   2 2171.88   74.69
  -1   6  -2   16.10    1.20
  -5  -1  -2   13.40    1.30
  -5  -1  -2   12.90    1.40
  -1   6  -2   15.40    1.10
  -1   6  -2   14.20    1.20
   6  -5  -2   17.20    1.20
   6  -5  -2   14.00    1.30
  -5  -1  -2   12.00    1.40
   1  -6   2   11.70    1.10
  -6   5   2   13.20    1.20
  -6   5   2   14.40    1.20
   5   1   2   13.40    1.20
   5   1   2   11.90    1.20
   5   1   2   11.90    1.30
  -6   5   2   13.10    1.30
   1  -6   2   12.20    1.20
   1  -6   2   13.90    1.80
  -6   5   2   14.90    1.10
  -5   0  -2 1373.56   47.60
  -5   0  -2 1411.26   47.50
   0   5  -2 1410.66   47.40
   0   5  -2 1424.16   47.40
   5  -5  -2 1418.26   47.50
   5  -5  -2 1408.86   47.50
   0   5  -2 1341.97   47.40
  -5   0  -2 1397.86   47.60
   5  -5  -2 1411.96   47.60
   5   0   2 1448.46   47.50
  -5   5   2 1404.06   47.50
   5   0   2 1404.26   47.60
   5   0   2 1411.66   47.40
  -5   5   2 1408.36   47.50
   0  -5   2 1352.36   47.40
  -5   5   2 1419.76   47.50
   0  -5   2 1376.56   47.40
   1   4  -2 1325.07   44.60
  -5   1  -2 1323.37   44.70
   1   4  -2 1325.87   44.60
   4  -5  -2 1330.07   44.70
  -5   1  -2 1331.17   44.80
   4  -5  -2 1341.67   44.80
   1   4  -2 1226.68   44.60
  -5   1  -2 1304.57   44.60
   4  -5  -2 1321.37   44.70
  -4   5   2 1331.07   44.70
  -1  -4   2 1284.97   44.80
  -1  -4   2 1323.87   44.80
   5  -1   2 1356.66   44.70
  -4   5   2 1332.77   44.60
  -1  -4   2 1302.07   44.70
   5  -1   2 1365.56   44.90
  -4   5   2 1300.27   44.70
   5  -1   2 1322.97   44.60
   2   3  -2 2370.66   84.89
   2   3  -2 2493.65   84.89
  -5   2  -2 2415.96   85.09
   3  -5  -2 2527.25   84.99
   2   3  -2 2485.75   84.89
   3  -5  -2 2432.26   84.89
  -5   2  -2 2542.45   84.99
   3  -5  -2 2419.46   84.99
  -3   5   2 2552.54   84.89
  -2  -3   2 2537.55   84.99
   5  -2   2 2607.14   84.79
   5  -2   2 2599.94   85.09
  -3   5   2 2483.05   84.99
  -2  -3   2 2507.75   84.99
   5  -2   2 2666.83   85.59
  -2  -3   2 2617.84   85.19
  -3   5   2 2619.24   84.89
   2  -5  -2  402.06   13.40
   3   2  -2  410.86   13.40
  -5   3  -2  391.46   13.10
   2  -5  -2  389.76   13.40
  -5   3  -2  407.86   13.40
   3   2  -2  395.96   13.40
  -5   3  -2  386.06   13.50
   3   2  -2  400.56   13.40
   2  -5  -2  396.16   13.40
  -3  -2   2  368.06   13.40
   5  -3   2  378.76   13.50
  -2   5   2  369.36   13.40
  -2   5   2  370.96   13.30
   5  -3   2  374.76   13.40
  -2   5   2  376.36   13.30
  -3  -2   2  366.36   13.40
   5  -3   2  379.06   13.20
  -3  -2   2  374.16   13.40
   4   1  -2 2460.75   82.09
   4   1  -2 2548.84   82.09
  -5   4  -2 2552.44   82.09
  -5   4  -2 2547.95   82.19
   1  -5  -2 2470.25   82.19
   1  -5  -2 2482.75   82.09
   1  -5  -2 2437.86   81.99
  -5   4  -2 2520.45   81.99
   4   1  -2 2515.45   82.09
  -4  -1   2 2328.07   82.59
   5  -4   2 2380.66   81.79
   5  -4   2 2451.85   82.19
   5  -4   2 2409.66   81.99
  -4  -1   2 2380.46   82.09
  -1   5   2 2344.47   81.99
  -4  -1   2 2284.07   82.09
  -1   5   2 2363.36   81.99
  -1   5   2 2346.67   81.99
  -5   5  -2   28.00    1.10
   5   0  -2   26.80    1.70
  -5   5  -2   23.50    1.60
   5   0  -2   24.70    1.70
  -5   5  -2   27.30    1.20
   0  -5  -2   26.80    1.60
   0  -5  -2   28.50    1.70
   5   0  -2   23.80    1.70
  -5   0   2   32.60    2.40
   5  -5   2   25.30    1.50
   5  -5   2   24.60    1.70
  -5   0   2   21.80    1.90
   0   5   2   29.70    1.60
   0   5   2   29.00    1.60
  -5   6  -2   63.49    2.60
  -1  -5  -2   65.39    3.00
  -1  -5  -2   65.09    3.00
   6  -1  -2   64.89    3.10
   6  -1  -2   66.19    3.00
  -5   6  -2   69.49    3.00
  -1  -5  -2   64.09    3.00
  -5   6  -2   69.69    3.10
  -6   1   2   72.99    3.30
   5  -6   2   73.99    3.90
  -6   1   2   81.29    3.20
   1   5   2   78.19    3.20
   1   5   2   79.99    3.10
   5  -6   2   80.59    2.70
   1   5   2   77.49    3.00
   5  -6   2   78.99    3.00
  -2  -5  -2  219.28    8.30
  -5   7  -2  213.78    7.80
   7  -2  -2  223.18    8.20
  -2  -5  -2  223.18    8.20
  -5   7  -2  216.58    8.10
   7  -2  -2  222.48    8.40
   7  -2  -2  227.38    8.20
  -5   7  -2  222.78    8.10
   5  -7   2  222.48    8.20
   5  -7   2  227.98    8.10
  -7   2   2  229.58    8.40
   2   5   2  221.78    8.10
   2   5   2  233.18    8.30
   5  -7   2  224.28    7.80
  -7   2   2  227.58    8.20
   2   5   2  225.78    8.20
  -7   2   2  221.08    8.40
   8  -3  -2  676.33   23.30
   8  -3  -2  660.63   23.00
  -3  -5  -2  664.03   23.30
  -3  -5  -2  670.33   23.00
  -5   8  -2  656.33   22.50
  -3  -5  -2  644.44   23.10
  -5   8  -2  641.44   22.90
  -5   8  -2  641.34   22.90
   8  -3  -2  665.23   23.00
  -8   3   2  680.43   23.20
   5  -8   2  647.14   23.60
   3   5   2  671.83   23.00
   3   5   2  661.63   23.10
  -8   3   2  668.53   22.90
  -8   3   2  665.53   23.20
   3   5   2  676.13   22.90
   5  -8   2  684.03   22.70
   5  -8   2  665.43   23.00
   9  -4  -2    0.80    1.00
   9  -4  -2   -0.30    1.40
  -5   9  -2    0.60    1.00
  -4  -5  -2    1.90    1.10
  -5   9  -2    2.00    0.90
   9  -4  -2    1.30    0.90
  -4  -5  -2   -2.10    1.00
  -4  -5  -2   -0.30    1.00
   5  -9   2   -0.70    1.00
   4   5   2   -0.80    1.30
   5  -9   2    1.90    0.70
  -9   4   2   -0.10    0.90
   5  -9   2   -0.70    1.00
  -9   4   2    3.00    1.30
   4   5   2   -0.40    1.10
  -9   4   2    2.30    1.00
   4   5   2    2.40    1.00
  -9   4   2   -1.20    1.20
  -5  -5  -2  136.09    5.90
  10  -5  -2  144.39    5.70
  -5  10  -2  147.79    5.10
  -5  10  -2  140.69    5.50
  -5  10  -2  142.49    5.60
  10  -5  -2  142.89    6.00
  -5  -5  -2  145.89    5.70
  -5  -5  -2  142.29    5.70
  10  -5  -2  136.89    6.60
 -10   5   2  142.09    5.50
   5 -10   2  130.39    5.60
   5   5   2  133.39    5.80
 -10   5   2  127.19    5.90
 -10   5   2  142.39    6.40
   5 -10   2  127.09    5.50
 -10   5   2  128.99    5.80
   5   5   2  131.09    5.80
  -5  11  -2  193.78    6.90
  -6  -5  -2  176.68    7.60
  -6  -5  -2  179.88    7.50
  -5  11  -2  185.98    7.30
  11  -6  -2  193.08    7.80
  11  -6  -2  188.58    7.50
  11  -6  -2  196.08    7.90
  -6  -5  -2  184.48    7.40
   6   5   2  179.38    8.80
   5 -11   2  196.18    7.10
 -11   6   2  190.08    7.70
   6   5   2  184.48    7.70
 -11   6   2  190.98    7.60
   5 -11   2  183.98    7.30
 -11   6   2  183.18    7.70
   5 -11   2  190.38    7.40
 -11   6   2  190.88    7.30
  -4  10  -2  224.18    8.40
  -4  10  -2  230.78    8.50
  10  -6  -2  231.28    8.60
  -4  10  -2  232.48    8.20
  -6  -4  -2  221.88    8.80
  10  -6  -2  232.28    8.50
  -6  -4  -2  221.18    8.60
  10  -6  -2  241.78    9.10
  -6  -4  -2  220.28    8.60
 -10   6   2  222.78    8.80
   4 -10   2  222.78    8.60
   6   4   2  222.08    8.70
 -10   6   2  221.68    8.70
   4 -10   2  233.38    8.40
 -10   6   2  221.78    8.80
 -10   6   2  229.98    8.40
   4 -10   2  222.68    8.50
  -3   9  -2    2.50    1.00
  -3   9  -2    3.60    1.00
   9  -6  -2    3.90    1.10
   9  -6  -2    3.60    1.00
  -6  -3  -2    1.20    1.20
  -6  -3  -2    1.50    1.20
   9  -6  -2    5.30    1.40
  -6  -3  -2    3.00    1.20
   6   3   2    4.20    1.20
   3  -9   2    4.40    1.00
   6   3   2    3.30    1.40
  -9   6   2    6.20    1.30
   3  -9   2    4.10    1.40
   6   3   2    2.40    1.10
  -9   6   2    5.30    1.10
   3  -9   2    4.60    1.20
  -9   6   2    5.60    1.30
   8  -6  -2  666.03   23.00
  -6  -2  -2  643.44   23.00
  -2   8  -2  662.13   22.80
  -6  -2  -2  652.93   23.30
  -2   8  -2  682.73   23.20
  -6  -2  -2  675.53   23.10
   2  -8   2  648.04   23.00
  -8   6   2  675.33   23.00
   6   2   2  667.83   23.70
   6   2   2  656.23   23.00
  -8   6   2  676.03   23.10
  -8   6   2  662.33   23.20
   2  -8   2  687.23   22.90
  -8   6   2  656.63   23.10
   2  -8   2  641.54   22.90
   6   2   2  679.23   23.10
  -6  -1  -2   35.90    2.30
  -1   7  -2   38.60    2.10
   7  -6  -2   40.50    2.40
  -1   7  -2   38.10    2.20
  -1   7  -2   38.10    2.00
  -6  -1  -2   38.00    2.30
  -6  -1  -2   38.10    2.30
   7  -6  -2   38.10    2.20
   7  -6  -2   42.60    2.30
  -7   6   2   45.80    2.40
   1  -7   2   44.90    2.20
   6   1   2   42.20    2.40
  -7   6   2   46.00    2.20
  -7   6   2   47.50    2.20
  -7   6   2   47.00    2.50
   1  -7   2   47.10    2.20
   1  -7   2   44.10    2.30
   6   1   2   40.60    2.80
   6   1   2   48.60    2.30
  -6   0  -2  288.17   10.40
   0   6  -2  290.07   10.20
  -6   0  -2  286.57   10.50
  -6   0  -2  280.47   10.20
   6  -6  -2  294.67   10.50
   6  -6  -2  286.37   10.30
   0   6  -2  287.27   10.20
   6  -6  -2  292.07   10.30
   0   6  -2  291.47   10.30
   0  -6   2  286.47   10.20
  -6   6   2  286.87   10.40
   0  -6   2  279.97   10.30
   6   0   2  293.67   10.40
   6   0   2  286.97   10.60
  -6   6   2  289.47   10.30
   6   0   2  292.97   10.30
  -6   6   2  289.77   10.40
   0  -6   2  285.37   10.20
  -6   6   2  298.07   10.20
  -6   1  -2   10.50    1.60
  -6   1  -2   12.50    1.30
   1   5  -2   12.70    1.20
   5  -6  -2   12.90    1.20
   1   5  -2   11.20    1.10
   1   5  -2   11.20    1.20
   5  -6  -2   11.60    1.10
  -6   1  -2   12.60    1.40
   5  -6  -2   12.00    1.20
  -5   6   2   14.50    1.30
  -1  -5   2   11.40    1.10
  -1  -5   2   16.00    1.30
   6  -1   2   13.20    1.40
  -5   6   2   15.40    1.30
   6  -1   2   11.80    1.30
  -1  -5   2   15.40    1.30
  -5   6   2   13.70    1.10
   6  -1   2   13.40    1.10
   4  -6  -2  135.29    4.90
  -6   2  -2  134.69    5.10
   2   4  -2  136.99    4.90
   4  -6  -2  132.99    4.90
  -6   2  -2  139.59    5.00
   2   4  -2  137.59    4.90
   4  -6  -2  135.19    5.00
   2   4  -2  133.09    4.90
  -6   2  -2  132.19    4.80
  -2  -4   2  121.09    4.90
  -4   6   2  121.19    4.90
  -2  -4   2  123.59    4.80
   6  -2   2  120.09    4.70
  -4   6   2  123.99    4.80
   6  -2   2  122.79    5.10
  -4   6   2  118.79    4.80
  -2  -4   2  121.89    5.40
   6  -2   2  121.59    4.90
   3   3  -2   70.99    3.20
   3  -6  -2   70.29    3.10
  -6   3  -2   75.49    3.20
   3  -6  -2   70.29    3.10
   3   3  -2   73.59    3.20
  -6   3  -2   71.39    2.90
   3  -6  -2   75.89    3.20
  -6   3  -2   76.19    3.30
   3   3  -2   69.59    3.20
  -3  -3   2   81.69    3.20
  -3   6   2   83.29    3.20
   6  -3   2   80.59    3.00
  -3  -3   2   80.09    3.30
  -3  -3   2   77.89    3.20
  -3   6   2   81.29    3.10
  -3   6   2   79.39    3.10
   6  -3   2   80.59    3.80
   6  -3   2   79.19    3.20
   4   2  -2  503.45   16.80
   4   2  -2  514.75   16.80
  -6   4  -2  507.55   16.90
  -6   4  -2  510.55   16.80
   2  -6  -2  476.65   16.70
  -6   4  -2  492.65   16.40
   4   2  -2  501.75   16.80
   2  -6  -2  502.15   16.70
  -4  -2   2  465.25   16.70
   6  -4   2  472.05   17.30
   6  -4   2  476.55   17.40
  -2   6   2  459.25   16.70
   6  -4   2  474.45   16.50
  -4  -2   2  457.95   16.70
  -2   6   2  470.55   16.70
  -4  -2   2  454.35   16.80
  -2   6   2  468.45   16.60
   1  -6  -2   73.79    3.00
   5   1  -2   72.19    3.10
   5   1  -2   77.89    3.20
   5   1  -2   76.89    3.10
  -6   5  -2   75.39    3.20
   1  -6  -2   79.29    3.10
  -6   5  -2   79.69    3.10
   6  -5   2   67.29    3.70
  -5  -1   2   61.59    3.00
  -1   6   2   61.99    2.90
  -1   6   2   63.69    2.90
  -1   6   2   66.29    3.00
  -5  -1   2   60.09    3.70
  -6   6  -2   61.19    2.70
   6   0  -2   54.69    2.90
  -6   6  -2   56.79    2.70
   0  -6  -2   66.99    3.70
   0  -6  -2   65.99    2.90
  -6   6  -2   60.69    2.30
   0  -6  -2   61.79    2.80
   6   0  -2   61.39    2.80
   6   0  -2   56.19    2.90
  -6   6  -2   63.49    2.30
   6  -6   2   67.99    3.50
  -6   0   2   57.59    2.90
   0   6   2   61.59    2.70
   0   6   2   62.19    2.70
   6  -6   2   61.29    2.90
   0   6   2   64.49    2.80
  -6   0   2   55.49    2.80
  -1  -6  -2 1009.30   34.00
  -6   7  -2  978.20   34.00
   7  -1  -2 1007.40   34.10
   7  -1  -2  989.10   34.00
  -1  -6  -2  977.30   34.10
  -1  -6  -2  993.60   34.00
   7  -1  -2 1003.70   34.20
  -6   7  -2  998.80   33.60
  -6   7  -2  971.00   34.00
  -7   1   2  989.30   34.20
   6  -7   2 1000.30   33.60
   1   6   2  978.50   33.90
  -7   1   2  995.40   34.00
  -7   1   2  991.30   34.20
   1   6   2 1005.50   34.00
   1   6   2  989.20   34.00
   6  -7   2 1005.80   34.60
   6  -7   2 1013.30   34.10
   8  -2  -2  472.35   15.90
  -2  -6  -2  475.25   15.80
  -6   8  -2  394.26   15.70
  -6   8  -2  465.25   15.80
   8  -2  -2  472.35   16.10
  -6   8  -2  461.75   15.30
  -2  -6  -2  467.95   15.90
  -2  -6  -2  483.45   16.00
   8  -2  -2  475.75   15.90
   2   6   2  435.96   15.80
  -8   2   2  433.06   15.90
  -8   2   2  428.76   15.70
   6  -8   2  426.86   15.70
   2   6   2  430.66   15.70
  -8   2   2  429.16   16.00
   6  -8   2  431.46   15.40
   2   6   2  447.46   15.90
   6  -8   2  437.56   15.90
  -3  -6  -2  381.66   13.40
  -6   9  -2  368.16   13.20
  -6   9  -2  374.16   13.30
  -3  -6  -2  355.46   13.40
  -6   9  -2  360.56   12.80
   9  -3  -2  388.26   13.70
   9  -3  -2  371.46   13.40
  -3  -6  -2  374.86   13.30
   6  -9   2  363.86   13.20
   6  -9   2  380.06   13.40
   3   6   2  367.16   13.30
   3   6   2  370.96   13.30
  -9   3   2  377.76   13.60
  -9   3   2  383.36   13.50
  -9   3   2  367.86   13.20
   6  -9   2  371.36   13.00
   3   6   2  370.46   13.50
  -4  -6  -2  649.83   23.50
  -6  10  -2  670.53   22.70
  -4  -6  -2  682.83   23.30
  10  -4  -2  687.83   23.70
  -4  -6  -2  688.73   23.30
  -6  10  -2  664.23   23.20
  10  -4  -2  689.93   23.40
  -6  10  -2  680.23   23.20
  10  -4  -2  676.63   23.30
 -10   4   2  634.54   23.50
   6 -10   2  643.54   23.30
 -10   4   2  652.23   23.10
   4   6   2  655.13   23.30
   6 -10   2  667.03   22.90
 -10   4   2  681.23   23.50
 -10   4   2  647.84   23.60
   6 -10   2  632.94   23.10
   4   6   2  682.43   23.50
  11  -5  -2  330.67   12.30
  -5  -6  -2  329.97   11.80
  -5  -6  -2  320.07   11.80
  11  -5  -2  324.27   11.70
  -6  11  -2  325.97   11.60
  -6  11  -2  321.67   11.10
  -6  11  -2  306.67   12.10
  11  -5  -2  318.87   12.40
  -5  -6  -2  308.07   11.90
   6 -11   2  309.27   11.60
   5   6   2  325.87   13.50
   5   6   2  320.17   12.30
   6 -11   2  316.47   11.80
 -11   5   2  323.47   12.10
 -11   5   2  314.57   11.90
 -11   5   2  300.97   12.00
   6 -11   2  319.67   11.70
 -11   5   2  317.17   11.60
  -6  12  -2  342.97   12.20
  12  -6  -2  330.47   12.70
  -6  -6  -2  327.07   12.60
  12  -6  -2  332.07   12.20
  -6  -6  -2  335.67   12.90
  -6  12  -2  336.67   11.70
  -6  -6  -2  345.37   12.40
  12  -6  -2  335.37   12.30
   6   6   2  327.87   12.40
 -12   6   2  326.87   12.10
 -12   6   2  334.57   12.50
 -12   6   2  319.57   12.60
   6 -12   2  334.67   12.40
   6 -12   2  334.47   12.20
   6 -12   2  313.07   11.90
 -12   6   2  324.87   12.60
   6   6   2  342.07   12.50
  -7  -6  -2  291.87   11.60
  13  -7  -2  299.27   11.70
  -7  -6  -2  308.77   11.30
  -6  13  -2  301.77   11.10
  -7  -6  -2  295.47   11.20
  13  -7  -2  290.87   11.10
  -6  13  -2  298.77   10.50
  13  -7  -2  301.27   11.30
   6 -13   2  296.67   10.90
 -13   7   2  285.47   11.40
   6 -13   2  293.87   11.20
   6 -13   2  291.57   11.10
   7   6   2  288.67   11.20
 -13   7   2  288.87   11.50
   7   6   2  296.87   11.40
 -13   7   2  288.57   11.50
 -13   7   2  293.67   10.90
  12  -7  -2   59.09    3.10
  12  -7  -2   52.99    3.70
  -5  12  -2   60.19    2.80
  -7  -5  -2   56.59    3.50
  -5  12  -2   56.29    3.30
  -7  -5  -2   52.49    3.50
  12  -7  -2   58.89    4.00
   7   5   2   51.99    3.50
   7   5   2   58.19    3.50
   5 -12   2   56.79    3.30
 -12   7   2   55.19    3.50
 -12   7   2   57.79    3.10
 -12   7   2   54.89    3.70
   5 -12   2   55.29    3.10
   5 -12   2   56.29    3.00
 -12   7   2   60.89    3.50
  -4  11  -2  580.34   19.10
  -7  -4  -2  557.44   19.50
  11  -7  -2  551.54   19.40
  -7  -4  -2  570.64   19.70
  -4  11  -2  552.94   19.40
  11  -7  -2  553.64   19.90
  -7  -4  -2  548.65   19.80
  11  -7  -2  552.94   19.50
 -11   7   2  560.54   19.30
   4 -11   2  553.94   19.20
   7   4   2  557.44   19.70
 -11   7   2  542.75   19.70
   4 -11   2  546.15   19.50
 -11   7   2  519.75   19.70
 -11   7   2  535.25   19.70
   7   4   2  530.35   20.90
   4 -11   2  546.25   19.50
  -7  -3  -2   60.99    3.70
  -3  10  -2   62.49    3.30
  -7  -3  -2   57.29    3.40
  -3  10  -2   68.49    3.20
  -7  -3  -2   64.29    3.60
  10  -7  -2   70.89    3.80
  10  -7  -2   71.19    3.40
 -10   7   2   62.09    3.50
   3 -10   2   75.19    3.10
 -10   7   2   62.89    3.40
   7   3   2   66.69    3.40
 -10   7   2   69.39    3.40
   3 -10   2   59.19    3.20
   7   3   2   66.99    3.70
 -10   7   2   66.29    3.10
   3 -10   2   61.29    3.30
   9  -7  -2 1198.58   40.70
  -7  -2  -2 1188.58   40.00
   9  -7  -2 1159.68   39.90
  -7  -2  -2 1136.99   39.80
  -2   9  -2 1181.18   39.60
  -7  -2  -2 1152.28   40.10
  -2   9  -2 1121.49   39.70
  -2   9  -2 1179.58   39.80
  -9   7   2 1146.69   39.90
   2  -9   2 1194.98   39.70
  -9   7   2 1200.68   40.10
  -9   7   2 1145.79   40.00
   7   2   2 1169.88   39.90
  -9   7   2 1163.48   40.50
   2  -9   2 1154.58   39.90
   7   2   2 1182.98   39.90
   2  -9   2 1110.49   39.70
  -7  -1  -2   99.89    4.50
   8  -7  -2  107.89    5.20
   8  -7  -2  110.59    5.00
  -1   8  -2  106.59    4.40
  -1   8  -2  109.09    4.90
  -7  -1  -2  103.29    4.80
  -7  -1  -2  107.79    4.80
   8  -7  -2  104.49    4.60
   1  -8   2  114.59    5.40
  -8   7   2  109.89    4.70
   1  -8   2  111.79    4.60
  -8   7   2  117.69    4.50
   1  -8   2  123.99    4.50
   7   1   2  114.19    4.70
   7   1   2  110.49    4.90
  -8   7   2  115.59    4.60
   7   1   2  110.99    4.60
  -8   7   2  116.39    4.70
  -7   0  -2  817.52   28.20
   7  -7  -2  839.02   28.60
   7  -7  -2  844.82   28.30
   0   7  -2  815.92   28.10
   7  -7  -2  814.22   28.30
  -7   0  -2  834.72   28.40
  -7   0  -2  814.52   28.50
   0   7  -2  828.22   28.20
   7   0   2  834.22   28.40
  -7   7   2  801.22   28.40
   7   0   2  789.52   28.50
   0  -7   2  815.22   28.10
   7   0   2  844.62   28.60
  -7   7   2  832.22   28.20
  -7   7   2  838.02   28.70
  -7   7   2  827.02   28.20
   0  -7   2  795.72   28.20
   0  -7   2  822.42   28.20
   1   6  -2   46.60    2.30
  -7   1  -2   48.10    2.40
  -7   1  -2   48.70    2.20
   6  -7  -2   45.20    2.20
   1   6  -2   46.80    2.30
  -7   1  -2   43.30    2.40
   6  -7  -2   46.30    2.30
   1   6  -2   44.80    2.20
   7  -1   2   39.70    2.30
  -6   7   2   36.60    2.20
  -6   7   2   39.40    2.10
   7  -1   2   38.80    2.40
  -1  -6   2   38.80    2.20
  -1  -6   2   35.80    2.20
  -6   7   2   38.60    2.20
  -1  -6   2   37.40    2.10
   7  -1   2   41.30    2.20
   5  -7  -2 2234.38   75.09
   2   5  -2 2256.57   74.59
   5  -7  -2 2180.28   74.59
  -7   2  -2 2181.48   74.79
   2   5  -2 2253.97   74.59
  -7   2  -2 2288.17   74.69
  -7   2  -2 2012.70   74.99
   2   5  -2 2238.28   74.59
   5  -7  -2 2223.88   74.59
  -2  -5   2 2163.58   74.49
   7  -2   2 2224.28   74.89
  -2  -5   2 2164.48   74.69
  -5   7   2 2218.68   74.49
  -2  -5   2 2195.48   74.59
  -5   7   2 2232.98   74.59
   7  -2   2 2235.88   74.49
   7  -2   2 2210.98   74.69
  -5   7   2 2230.48   74.69
   4  -7  -2  356.86   12.20
  -7   3  -2  343.37   12.30
   3   4  -2  351.16   12.20
  -7   3  -2  339.87   12.50
   4  -7  -2  344.67   12.20
   4  -7  -2  332.07   12.50
   3   4  -2  355.16   12.20
  -7   3  -2  336.77   12.40
   3   4  -2  354.46   12.20
  -3  -4   2  341.57   12.20
  -4   7   2  343.77   12.20
  -4   7   2  345.17   12.20
   7  -3   2  355.06   12.10
  -3  -4   2  343.87   12.30
   7  -3   2  342.07   12.20
  -4   7   2  346.57   12.10
   7  -3   2  339.57   12.40
  -3  -4   2  332.57   12.10
   3  -7  -2  981.30   32.40
   4   3  -2  993.70   32.40
   4   3  -2  977.10   32.40
  -7   4  -2  963.70   32.50
   3  -7  -2  988.30   32.40
   3  -7  -2  942.61   33.10
  -7   4  -2  948.21   32.10
   4   3  -2  951.90   32.40
  -7   4  -2  976.20   32.40
  -3   7   2  924.81   32.30
   7  -4   2  897.21   33.00
  -4  -3   2  930.51   32.40
  -3   7   2  923.61   32.20
   7  -4   2  938.11   32.10
  -4  -3   2  899.51   32.30
   7  -4   2  935.51   32.40
  -4  -3   2  945.91   33.30
  -3   7   2  924.51   32.30
   2  -7  -2  215.38    8.40
   2  -7  -2  226.28    8.20
   5   2  -2  232.58    8.20
   5   2  -2  224.48    8.30
  -7   5  -2  226.68    8.20
  -7   5  -2  239.28    8.00
   5   2  -2  228.48    8.30
  -7   5  -2  219.38    8.30
   2  -7  -2  230.48    8.50
  -7   5  -2  225.28    7.80
  -2   7   2  221.68    8.10
   7  -5   2  215.78    8.10
  -2   7   2  221.48    8.00
   7  -5   2  223.48    7.90
  -5  -2   2  219.38    8.40
  -2   7   2  219.58    8.10
  -5  -2   2  207.68    8.10
  -5  -2   2  223.88    8.20
   7  -5   2  221.58    8.50
   6   1  -2 1020.60   33.30
   1  -7  -2  979.50   33.20
  -7   6  -2  984.00   33.30
  -7   6  -2  871.71   32.80
  -7   6  -2  998.60   32.90
   1  -7  -2  974.60   33.20
   1  -7  -2 1032.90   33.20
   6   1  -2  939.11   33.30
  -7   6  -2  859.41   33.20
   7  -6   2  977.00   33.20
   7  -6   2 1004.10   33.40
  -6  -1   2  979.60   33.40
  -6  -1   2  996.60   33.30
  -1   7   2  991.60   33.20
  -6  -1   2  956.30   33.20
  -1   7   2  956.10   33.10
  -1   7   2  987.10   33.20
   0  -7  -2   14.40    1.70
  -7   7  -2   15.60    1.10
  -7   7  -2   11.70    0.90
   0  -7  -2   12.00    1.50
   7   0  -2   16.20    1.60
   7   0  -2   12.70    1.80
  -7   7  -2   11.70    1.40
   7   0  -2   14.10    1.60
  -7   7  -2   15.00    1.40
   0   7   2   12.90    1.50
  -7   0   2   12.20    1.50
   7  -7   2   13.20    1.60
   7  -7   2   12.60    1.40
  -7   0   2   15.10    1.60
   0   7   2   12.90    1.40
  -7   0   2   11.00    1.50
  -1  -7  -2  699.03   23.30
  -1  -7  -2  669.23   23.40
   8  -1  -2  685.43   23.40
  -7   8  -2  670.13   22.70
   8  -1  -2  677.63   23.30
  -7   8  -2  661.43   23.40
   8  -1  -2  671.83   23.60
  -1  -7  -2  679.53   23.30
   1   7   2  680.53   23.30
   1   7   2  643.94   23.10
   1   7   2  664.33   23.30
   7  -8   2  675.53   23.50
  -8   1   2  638.84   23.50
   7  -8   2  683.03   22.90
  -8   1   2  655.43   23.20
   7  -8   2  655.83   23.20
  -8   1   2  688.73   23.40
   9  -2  -2    3.90    1.30
  -2  -7  -2    5.70    1.50
  -2  -7  -2    5.30    1.50
  -7   9  -2    1.40    1.20
   9  -2  -2    3.40    1.30
  -7   9  -2    4.40    0.70
  -2  -7  -2    5.70    1.50
  -7   9  -2    2.90    1.30
   9  -2  -2    2.60    1.40
   2   7   2    2.60    1.30
   7  -9   2    3.50    0.80
   2   7   2    1.30    1.20
  -9   2   2    2.40    1.30
  -9   2   2    1.90    1.50
   7  -9   2    1.70    1.20
   2   7   2    0.80    1.40
  -9   2   2    1.20    1.40
   7  -9   2    2.70    1.30
  -3  -7  -2  829.82   27.60
  10  -3  -2  812.52   28.10
  -7  10  -2  798.92   27.50
  -3  -7  -2  771.92   27.70
  -3  -7  -2  810.22   27.60
  -7  10  -2  740.73   27.40
  10  -3  -2  800.62   27.60
  -7  10  -2  781.42   26.90
  10  -3  -2  804.12   27.60
 -10   3   2  760.82   27.80
   7 -10   2  775.52   27.40
   3   7   2  790.52   27.70
   7 -10   2  812.52   27.10
   3   7   2  810.52   27.70
   7 -10   2  791.42   27.60
 -10   3   2  790.32   27.40
 -10   3   2  801.32   27.70
  11  -4  -2  246.88   10.30
  11  -4  -2  259.87   10.20
  -4  -7  -2  233.48    9.70
  -7  11  -2  247.38    8.90
  -4  -7  -2  249.38    9.60
  11  -4  -2  253.67    9.60
  -7  11  -2  253.87    9.60
  -4  -7  -2  249.48    9.70
 -11   4   2  264.87    9.50
 -11   4   2  262.67    9.90
 -11   4   2  260.87    9.90
   7 -11   2  264.67    9.80
   4   7   2  260.17   11.20
   4   7   2  250.87    9.60
   7 -11   2  252.47    9.50
   7 -11   2  247.78    9.20
 -11   4   2  255.67   10.00
  -7  12  -2  102.49    4.10
  -5  -7  -2  100.89    4.90
  -5  -7  -2  100.09    5.10
  12  -5  -2  106.89    4.90
  -7  12  -2   97.19    4.60
  -5  -7  -2  105.89    5.60
  12  -5  -2  103.49    5.00
  12  -5  -2  102.69    5.30
   7 -12   2  109.79    4.50
   5   7   2  110.19    5.00
   5   7   2  100.09    4.80
 -12   5   2  110.89    4.70
   7 -12   2  100.39    4.60
   7 -12   2  107.09    5.10
 -12   5   2  100.99    5.10
 -12   5   2  109.29    5.30
 -12   5   2  113.29    5.20
  -6  -7  -2   56.29    3.40
  13  -6  -2   54.89    3.40
  -7  13  -2   54.99    2.70
  -6  -7  -2   54.79    3.60
  -7  13  -2   54.99    3.20
  -6  -7  -2   52.79    3.60
  13  -6  -2   64.59    4.20
 -13   6   2   57.99    5.60
 -13   6   2   60.89    3.30
   7 -13   2   51.99    3.30
 -13   6   2   62.69    3.70
   7 -13   2   52.69    2.90
   6   7   2   52.79    3.40
   6   7   2   55.39    3.50
   7 -13   2   66.09    3.70
  14  -7  -2   94.09    5.00
  -7  -7  -2   98.39    5.00
  -7  14  -2   97.89    4.70
  -7  14  -2  103.79    4.20
  14  -7  -2   96.59    5.70
  -7  -7  -2  100.99    5.90
  -7  -7  -2  107.89    5.10
 -14   7   2  102.79    5.30
   7   7   2  100.39    5.10
 -14   7   2   98.39    5.40
   7 -14   2   99.49    4.50
 -14   7   2   97.79    4.60
   7 -14   2   95.29    4.70
  -7  15  -2  149.19    6.30
  -8  -7  -2  135.39    6.70
  -7  15  -2  144.89    5.70
  15  -8  -2  150.08    7.10
  -8  -7  -2  141.39    6.50
  -8  -7  -2  149.99    6.60
 -15   8   2  134.49    6.80
   7 -15   2  138.39    6.60
 -15   8   2  140.39    6.70
   8   7   2  138.79    6.70
   7 -15   2  137.49    6.00
   7 -15   2  139.99    6.30
 -15   8   2  150.28    6.20
  14  -8  -2   16.80    2.50
  -8  -6  -2   16.80    2.40
  14  -8  -2   15.20    2.20
  -6  14  -2   16.20    1.80
  14  -8  -2   20.50    2.40
  -8  -6  -2   18.90    2.60
  -6  14  -2   12.90    1.80
 -14   8   2   11.00    2.10
 -14   8   2   10.30    2.20
   6 -14   2   16.40    2.10
 -14   8   2   17.40    2.10
   6 -14   2   12.30    1.90
   8   6   2   13.60    2.30
  -8  -5  -2   63.09    3.70
  -5  13  -2   62.49    3.40
  13  -8  -2   67.29    3.80
  13  -8  -2   65.09    4.40
  -8  -5  -2   58.49    4.00
  -5  13  -2   63.09    3.10
  13  -8  -2   63.99    3.50
   8   5   2   59.39    4.10
   5 -13   2   67.59    3.50
 -13   8   2   67.09    4.10
   5 -13   2   61.49    3.50
 -13   8   2   68.69    3.50
 -13   8   2   68.39    3.80
   8   5   2   67.39    3.70
 -13   8   2   69.59    3.90
   5 -13   2   67.39    3.80
  -8  -4  -2   77.09    4.00
  12  -8  -2   80.29    4.40
  -8  -4  -2   74.69    4.10
  -8  -4  -2   74.79    4.20
  -4  12  -2   74.39    3.90
  -4  12  -2   78.89    3.60
   8   4   2   75.59    4.00
   4 -12   2   75.59    3.90
 -12   8   2   82.69    3.80
   8   4   2   81.39    4.40
   4 -12   2   81.19    3.70
 -12   8   2   77.49    4.40
   4 -12   2   75.19    3.90
 -12   8   2   77.19    4.60
 -12   8   2   81.39    4.40
  -8  -3  -2   -1.90    1.40
  -3  11  -2    0.60    1.00
  -8  -3  -2   -0.60    1.40
  11  -8  -2    0.30    1.70
  -3  11  -2   -0.90    1.30
  11  -8  -2   -1.10    1.20
   3 -11   2   -2.50    1.10
 -11   8   2    1.00    1.10
   3 -11   2   -1.80    1.10
   3 -11   2   -1.90    1.20
   8   3   2   -1.80    2.10
   8   3   2   -3.30    1.40
 -11   8   2   -1.20    1.40
 -11   8   2   -2.40    1.20
 -11   8   2   -1.50    1.10
  -8  -2  -2  123.89    5.60
  10  -8  -2  130.89    5.70
  -2  10  -2  120.69    5.20
  -2  10  -2  123.09    5.20
  10  -8  -2  128.09    5.30
  -2  10  -2  127.29    5.30
  -8  -2  -2  126.69    5.40
  -8  -2  -2  116.69    5.20
 -10   8   2  121.69    5.10
   8   2   2  128.69    5.60
   8   2   2  126.19    5.50
   2 -10   2  122.29    5.20
 -10   8   2  127.59    5.50
 -10   8   2  119.29    5.20
 -10   8   2  124.79    5.40
   2 -10   2  139.89    5.20
   2 -10   2  117.49    5.20
  -8  -1  -2  163.98    6.30
  -8  -1  -2  157.78    6.10
   9  -8  -2  157.28    6.10
  -1   9  -2  156.58    6.10
   9  -8  -2  148.09    6.40
  -1   9  -2  158.38    6.10
  -8  -1  -2  153.38    6.50
  -1   9  -2  153.68    6.30
   9  -8  -2  164.38    6.60
  -9   8   2  149.59    6.10
   8   1   2  157.08    6.30
   1  -9   2  150.58    6.10
  -9   8   2  157.48    6.90
   1  -9   2  144.29    6.10
   1  -9   2  159.48    6.10
   8   1   2  146.89    6.20
   8   1   2  156.48    6.50
  -9   8   2  142.49    6.30
   0   8  -2  328.47   11.90
   8  -8  -2  345.77   12.40
   0   8  -2  290.47   11.80
   8  -8  -2  331.77   12.00
  -8   0  -2  324.37   11.90
   0   8  -2  344.17   12.10
   8  -8  -2  343.27   12.30
  -8   0  -2  325.57   12.20
  -8   0  -2  331.07   12.30
   8   0   2  332.27   11.90
   8   0   2  334.77   12.10
  -8   8   2  335.17   12.10
   8   0   2  343.87   12.40
   0  -8   2  338.47   11.80
  -8   8   2  329.17   11.90
  -8   8   2  323.87   12.00
   0  -8   2  320.87   12.30
  -8   8   2  343.67   11.90
   1   7  -2   94.59    4.30
  -8   1  -2  123.39    5.80
   7  -8  -2  111.39    4.50
   1   7  -2  112.39    4.80
   1   7  -2  111.39    5.50
   7  -8  -2  110.59    5.30
  -8   1  -2  114.79    4.40
  -8   1  -2  108.39    4.80
  -1  -7   2  101.89    5.30
  -7   8   2  105.99    5.40
   8  -1   2  105.09    4.80
  -7   8   2  102.59    4.50
   8  -1   2  106.19    4.60
  -1  -7   2  108.89    4.50
  -1  -7   2  114.09    4.40
  -7   8   2  106.69    4.30
   2   6  -2  679.03   23.00
   6  -8  -2  653.33   22.90
  -8   2  -2  641.34   23.20
   6  -8  -2  644.44   23.70
  -8   2  -2  636.64   22.80
  -8   2  -2  674.63   23.10
   2   6  -2  665.13   23.00
  -6   8   2  677.03   22.90
  -6   8   2  668.73   23.00
   8  -2   2  697.33   23.50
  -6   8   2  649.64   23.00
  -2  -6   2  676.63   23.00
   8  -2   2  670.53   23.10
  -2  -6   2  652.03   22.90
   8  -2   2  674.53   22.90
   5  -8  -2  135.09    5.20
  -8   3  -2  133.59    5.10
   3   5  -2  134.59    5.30
  -8   3  -2  128.19    5.50
  -8   3  -2  137.29    5.40
   3   5  -2  138.99    5.30
   3   5  -2  127.89    5.30
   5  -8  -2  128.39    6.30
   5  -8  -2  140.69    5.60
  -3  -5   2  131.99    5.30
  -5   8   2  123.29    5.20
  -3  -5   2  138.59    5.30
   8  -3   2  135.59    5.20
   8  -3   2  137.29    5.40
  -5   8   2  139.99    5.10
  -5   8   2  135.49    5.30
  -3  -5   2  134.49    6.30
   8  -3   2  142.39    5.70
   4   4  -2   16.40    1.60
   4   4  -2   12.50    1.40
   4  -8  -2   15.80    1.40
   4  -8  -2   14.70    1.60
  -8   4  -2   12.30    1.50
  -8   4  -2   16.60    1.40
   4  -8  -2   15.30    2.20
  -8   4  -2   13.30    1.60
   4   4  -2   15.10    1.50
   8  -4   2   16.00    1.70
  -4  -4   2   16.00    1.70
   8  -4   2   14.30    1.30
   8  -4   2   14.80    1.60
  -4  -4   2   12.70    1.50
  -4   8   2   15.50    1.50
  -4  -4   2   14.30    1.50
  -4   8   2   16.30    1.30
  -4   8   2   11.60    1.50
   3  -8  -2  664.03   23.00
   5   3  -2  689.83   23.10
   3  -8  -2  684.53   23.40
   5   3  -2  686.13   23.10
  -8   5  -2  654.03   22.70
   3  -8  -2  673.83   23.00
  -8   5  -2  655.53   23.20
  -8   5  -2  685.43   23.20
   8  -5   2  662.33   22.80
  -3   8   2  658.33   23.00
   8  -5   2  672.73   23.30
  -5  -3   2  649.04   23.00
  -3   8   2  653.03   22.90
   8  -5   2  664.03   23.10
  -5  -3   2  657.93   23.10
  -3   8   2  649.34   23.00
  -5  -3   2  665.73   23.20
   6   2  -2  445.46   16.00
  -8   6  -2  441.06   15.80
   6   2  -2  443.66   16.10
   2  -8  -2  424.86   15.90
  -8   6  -2  422.56   16.00
  -8   6  -2  440.76   16.00
   2  -8  -2  448.76   15.90
  -8   6  -2  429.16   15.50
   2  -8  -2  441.56   16.00
   6   2  -2  446.56   16.00
  -6  -2   2  462.65   16.00
   8  -6   2  472.05   15.70
  -6  -2   2  453.55   16.10
  -2   8   2  467.45   15.90
  -2   8   2  472.45   16.00
  -6  -2   2  484.35   16.10
   8  -6   2  477.55   16.00
   8  -6   2  476.75   16.30
  -2   8   2  462.55   15.80
   1  -8  -2  681.03   23.20
   7   1  -2  673.73   23.40
  -8   7  -2  656.43   23.20
  -8   7  -2  663.03   22.80
   1  -8  -2  663.33   23.10
   1  -8  -2  671.03   23.20
   7   1  -2  656.23   23.20
  -8   7  -2  640.94   22.70
  -8   7  -2  658.93   23.30
   7   1  -2  671.83   23.20
  -1   8   2  642.04   23.80
  -7  -1   2  659.33   23.20
  -7  -1   2  668.63   23.40
  -1   8   2  695.33   23.20
   8  -7   2  672.33   23.20
  -7  -1   2  687.43   23.30
  -1   8   2  669.83   23.10
   8  -7   2  689.73   23.50
   8   0  -2  188.58    7.60
  -8   8  -2  195.98    6.80
  -8   8  -2  195.08    6.90
   0  -8  -2  188.48    7.40
   0  -8  -2  191.68    7.40
  -8   8  -2  195.28    7.50
   8   0  -2  195.68    7.50
   8   0  -2  197.88    7.40
  -8   0   2  198.08    7.50
  -8   0   2  181.88    7.30
   8  -8   2  192.48    7.30
   0   8   2  192.98    7.30
   0   8   2  187.78    7.30
  -8   0   2  186.28    7.60
   0   8   2  198.38    7.40
   8  -8   2  199.48    7.70
   9  -1  -2  206.58    8.00
  -1  -8  -2  215.08    7.90
   9  -1  -2  212.68    8.20
  -8   9  -2  211.38    7.30
  -1  -8  -2  209.28    7.90
  -8   9  -2  207.58    7.90
   9  -1  -2  214.28    8.40
  -1  -8  -2  214.48    7.90
  -8   9  -2  209.08    7.90
  -8   9  -2  207.38    7.20
   1   8   2  193.68    7.80
   1   8   2  194.98    7.80
   8  -9   2  199.58    7.30
   8  -9   2  199.78    7.80
  -9   1   2  199.48    7.90
  -9   1   2  202.38    8.10
  -9   1   2  204.68    8.00
   8  -9   2  197.08    8.00
   1   8   2  189.98    8.30
  10  -2  -2  582.04   20.90
  -8  10  -2  577.14   20.80
  10  -2  -2  585.14   21.30
  -8  10  -2  584.94   20.70
  -8  10  -2  567.74   20.00
  -2  -8  -2  578.34   20.90
  -2  -8  -2  590.74   20.80
  -2  -8  -2  607.34   20.80
  10  -2  -2  594.34   21.80
 -10   2   2  614.04   21.00
   8 -10   2  610.94   21.00
   8 -10   2  587.94   20.70
   2   8   2  593.24   20.90
   8 -10   2  587.04   20.30
 -10   2   2  569.94   21.00
   2   8   2  604.24   21.30
 -10   2   2  586.44   20.70
  -3  -8  -2  155.88    6.80
  -3  -8  -2  171.98    6.80
  11  -3  -2  177.18    7.90
  11  -3  -2  164.48    6.80
  -3  -8  -2  168.38    6.70
  -8  11  -2  165.08    6.70
  -8  11  -2  160.88    5.90
   3   8   2  160.08    7.30
   8 -11   2  162.78    6.60
   3   8   2  166.48    6.70
   8 -11   2  161.18    6.20
 -11   3   2  175.58    6.70
 -11   3   2  154.08    6.90
 -11   3   2  171.88    7.00
   8 -11   2  165.18    6.80
  -8  12  -2  499.25   17.50
  -4  -8  -2  483.95   18.40
  -4  -8  -2  532.05   18.90
  12  -4  -2  525.35   18.80
  12  -4  -2  521.65   18.40
  -8  12  -2  494.15   18.20
  -4  -8  -2  516.35   18.30
   8 -12   2  514.85   18.40
 -12   4   2  522.85   18.10
 -12   4   2  496.45   18.60
   4   8   2  505.85   18.30
   8 -12   2  517.05   18.20
 -12   4   2  509.25   18.50
   8 -12   2  508.75   17.80
   4   8   2  504.05   18.40
  -8  13  -2  168.78    6.40
  -5  -8  -2  177.58    7.20
  13  -5  -2  182.58    7.20
  -5  -8  -2  180.28    7.30
  -8  13  -2  183.78    7.20
  -5  -8  -2  167.68    7.40
  13  -5  -2  184.38    7.90
 -13   5   2  173.98    7.00
   8 -13   2  162.88    6.80
 -13   5   2  170.38    7.40
   8 -13   2  177.08    7.40
 -13   5   2  171.88    8.50
   8 -13   2  164.28    7.00
   5   8   2  175.28    7.40
  -8  14  -2  229.78    9.90
  14  -6  -2  253.87   10.60
  -6  -8  -2  273.17   10.30
  -6  -8  -2  274.07   10.40
  14  -6  -2  260.27   10.90
  -6  -8  -2  248.08   10.30
  -8  14  -2  257.77    9.30
   8 -14   2  255.77   10.00
 -14   6   2  251.97   10.40
   6   8   2  267.27   10.40
 -14   6   2  265.47    9.90
   8 -14   2  251.67    9.60
   8 -14   2  277.47   12.40
 -14   6   2  268.47   10.40
  15  -7  -2  134.99    6.80
  -8  15  -2  132.59    5.40
  -8  15  -2  139.69    6.30
  -7  -8  -2  133.69    6.40
  -7  -8  -2  123.09    6.50
  -7  -8  -2  141.99    6.60
 -15   7   2  147.09    6.10
   8 -15   2  135.59    5.80
 -15   7   2  133.19    6.60
 -15   7   2  153.18    6.70
   7   8   2  142.09    6.70
   8 -15   2  134.69    6.10
   8 -15   2  136.49    6.50
  -8  -8  -2   26.10    3.20
  -8  16  -2   23.90    2.20
  -8  -8  -2   17.20    3.10
  -8  -8  -2   21.50    2.90
  -8  16  -2   20.40    3.00
  16  -8  -2   23.50    3.30
   8   8   2   29.40    3.30
   8 -16   2   31.80    3.60
   8 -16   2   28.70    2.50
   8 -16   2   29.00    2.90
 -16   8   2   28.50    3.40
  -9  -8  -2   56.39    4.40
  -8  17  -2   58.89    3.50
  -8  17  -2   67.89    5.30
  -9  -8  -2   55.49    4.80
  -9  -8  -2   69.79    4.80
  17  -9  -2   66.19    5.00
   8 -17   2   71.09    4.90
   8 -17   2   64.99    4.20
   9   8   2   64.59    4.90
   8 -17   2   66.89    3.80
 -17   9   2   66.99    4.60
 -17   9   2   77.09    5.90
  -9  -7  -2   -2.20    2.00
  16  -9  -2   -1.30    2.30
  -9  -7  -2    0.20    2.20
  -7  16  -2    1.00    1.30
  -7  16  -2    2.00    1.80
 -16   9   2    0.00    2.20
   7 -16   2    3.20    1.70
   7 -16   2    1.10    2.20
   7 -16   2    0.20    2.00
 -16   9   2    1.80    1.60
   9   7   2    0.30    2.10
  -9  -6  -2    4.00    2.30
  -6  15  -2    3.90    1.40
  -9  -6  -2    2.60    2.00
  -9  -6  -2    6.40    2.20
  15  -9  -2    3.80    2.20
  -6  15  -2    3.80    1.90
   6 -15   2    4.50    2.00
   6 -15   2    8.20    1.70
   9   6   2    2.70    2.20
 -15   9   2    4.80    2.40
   6 -15   2    2.80    1.90
 -15   9   2    4.10    1.60
  -5  14  -2   27.90    2.40
  14  -9  -2   25.80    2.90
  -5  14  -2   30.00    2.10
  -9  -5  -2   27.40    3.00
  -9  -5  -2   26.80    2.80
  -9  -5  -2   30.80    3.00
  14  -9  -2   27.40    3.20
   5 -14   2   24.70    2.70
   5 -14   2   30.00    2.90
   5 -14   2   24.70    2.50
   9   5   2   25.40    2.90
 -14   9   2   24.70    2.30
 -14   9   2   26.20    2.90
 -14   9   2   23.90    2.70
 -14   9   2   22.20    2.40
  -4  13  -2   88.69    4.20
  -9  -4  -2   88.69    4.70
  -4  13  -2   86.69    4.00
  13  -9  -2   90.89    4.50
  13  -9  -2   89.39    4.90
  -9  -4  -2   87.19    4.50
 -13   9   2   92.39    4.70
   4 -13   2   87.39    4.50
 -13   9   2   89.99    4.10
   9   4   2   91.59    4.70
 -13   9   2   86.39    4.40
 -13   9   2   83.89    4.60
   9   4   2   96.09    4.70
   4 -13   2   86.39    4.30
   4 -13   2   79.49    4.30
  -3  12  -2   79.99    3.70
  -9  -3  -2   77.09    4.40
  -9  -3  -2   76.79    4.30
  -9  -3  -2   80.19    4.20
  -3  12  -2   74.19    3.90
  12  -9  -2   81.49    5.40
  12  -9  -2   79.59    4.70
   3 -12   2   81.59    4.00
   3 -12   2   77.19    4.00
 -12   9   2   81.89    3.90
   3 -12   2   75.59    3.90
 -12   9   2   79.49    4.20
 -12   9   2   75.09    4.10
   9   3   2   81.29    4.10
   9   3   2   87.59    4.60
 -12   9   2   86.29    3.80
  -9  -2  -2  328.27   11.70
  -9  -2  -2  315.27   11.80
  11  -9  -2  316.57   11.50
  -2  11  -2  311.17   11.30
  11  -9  -2  330.07   12.00
  -9  -2  -2  318.27   11.40
  -2  11  -2  331.47   11.20
   2 -11   2  300.67   11.50
 -11   9   2  283.57   12.10
   9   2   2  286.67   12.90
   2 -11   2  316.67   11.30
 -11   9   2  296.17   11.60
   9   2   2  298.47   11.70
 -11   9   2  305.87   11.40
   2 -11   2  287.37   11.30
 -11   9   2  307.77   11.20
  -9  -1  -2  168.58    6.90
  -9  -1  -2  152.88    6.50
  -1  10  -2  156.08    6.30
  -9  -1  -2  154.08    6.90
  -1  10  -2  163.18    6.50
  10  -9  -2  164.58    6.70
  10  -9  -2  155.48    6.50
  10  -9  -2  162.98    6.90
   1 -10   2  163.68    6.50
   9   1   2  174.98    7.10
 -10   9   2  169.28    6.90
   9   1   2  169.08    6.70
 -10   9   2  164.48    6.80
 -10   9   2  167.48    6.40
 -10   9   2  163.68    6.40
   1 -10   2  170.98    6.50
   1 -10   2  164.18    6.60
  -9   0  -2 1437.96   49.00
   9  -9  -2 1450.15   49.50
   9  -9  -2 1429.96   49.10
   0   9  -2 1457.65   49.10
  -9   0  -2 1451.95   49.30
   0   9  -2 1447.16   49.00
   0   9  -2 1392.86   49.10
   9  -9  -2 1477.35   49.50
  -9   0  -2 1419.66   49.50
  -9   9   2 1452.45   49.80
   0  -9   2 1406.96   49.20
   0  -9   2 1478.05   49.00
  -9   9   2 1394.96   49.20
  -9   9   2 1428.36   49.00
   9   0   2 1453.55   49.50
   9   0   2 1424.66   49.20
   9   0   2 1458.15   49.60
  -9   1  -2  149.29    6.00
   1   8  -2  151.98    6.00
   8  -9  -2  154.28    6.50
   1   8  -2  150.28    6.10
  -9   1  -2  150.58    6.50
   1   8  -2  149.39    6.10
   8  -9  -2  157.28    6.10
   8  -9  -2  145.09    6.00
   9  -1   2  153.98    6.10
   9  -1   2  158.18    6.30
  -1  -8   2  157.68    6.10
  -1  -8   2  154.68    6.20
  -8   9   2  163.18    6.00
  -8   9   2  145.59    6.20
  -1  -8   2  152.18    6.30
  -8   9   2  156.68    6.40
   9  -1   2  157.98    6.60
   2   7  -2 1170.48   40.00
  -9   2  -2 1117.19   40.30
  -9   2  -2 1151.38   39.90
   7  -9  -2 1142.69   40.00
   7  -9  -2 1173.18   40.10
   2   7  -2 1147.99   40.00
  -9   2  -2 1180.98   40.30
   7  -9  -2 1148.19   40.20
   2   7  -2 1168.78   40.00
   9  -2   2 1224.08   40.30
  -2  -7   2 1135.29   40.10
  -2  -7   2 1186.38   40.00
  -2  -7   2 1196.38   40.00
   9  -2   2 1185.78   40.40
  -7   9   2 1164.38   40.10
  -7   9   2 1202.88   40.60
   9  -2   2 1190.08   40.20
  -7   9   2 1176.28   39.90
   3   6  -2    5.30    1.30
   6  -9  -2    6.30    1.00
   3   6  -2    4.00    1.20
  -9   3  -2    7.30    1.10
  -9   3  -2    5.30    1.50
   6  -9  -2    4.00    1.40
  -9   3  -2    6.40    1.40
   6  -9  -2    5.20    1.30
   3   6  -2    2.30    1.10
   9  -3   2    4.80    1.20
  -6   9   2    2.60    1.20
  -6   9   2    6.10    1.50
  -3  -6   2    2.30    1.10
   9  -3   2    4.60    1.00
  -3  -6   2    4.60    1.20
   9  -3   2    4.70    1.40
  -9   4  -2  107.09    4.90
   5  -9  -2  108.89    4.80
   4   5  -2  107.99    4.80
   4   5  -2  106.19    4.80
   5  -9  -2  107.69    4.80
  -9   4  -2  109.69    5.00
  -9   4  -2  106.49    4.50
   4   5  -2  121.99    5.80
   5  -9  -2  114.79    5.10
  -4  -5   2  124.39    5.00
  -5   9   2  124.59    4.80
  -4  -5   2  131.69    4.90
   9  -4   2  124.69    4.70
   9  -4   2  123.29    4.90
  -4  -5   2  119.99    4.80
  -5   9   2  119.99    4.80
   9  -4   2  130.49    5.20
   4  -9  -2    2.50    1.00
   5   4  -2    4.50    1.80
  -9   5  -2    1.10    0.80
   4  -9  -2    2.90    1.20
   5   4  -2    0.10    1.00
  -9   5  -2   -0.20    1.00
   5   4  -2    1.70    1.10
   4  -9  -2   -1.20    0.90
   9  -5   2    2.40    1.10
   9  -5   2    2.30    1.20
  -4   9   2    0.90    1.00
  -4   9   2    1.00    0.90
   9  -5   2    1.40    0.80
  -5  -4   2   -0.70    1.00
  -4   9   2    1.20    0.80
  -5  -4   2   -0.80    1.00
   3  -9  -2  381.06   13.40
   3  -9  -2  368.96   13.30
   6   3  -2  378.26   13.40
  -9   6  -2  379.86   13.40
   6   3  -2  385.26   14.50
   3  -9  -2  384.06   13.40
  -9   6  -2  365.56   13.20
  -9   6  -2  366.76   13.50
   6   3  -2  378.96   13.50
  -9   6  -2  364.46   12.90
  -6  -3   2  352.36   13.30
  -6  -3   2  367.36   13.50
   9  -6   2  382.06   13.70
  -3   9   2  369.26   13.30
  -3   9   2  361.96   13.10
   9  -6   2  372.96   13.40
  -6  -3   2  373.06   13.40
   9  -6   2  377.16   13.00
   7   2  -2    5.60    1.40
   2  -9  -2    3.90    1.20
  -9   7  -2    4.70    1.20
  -9   7  -2    5.80    0.80
   2  -9  -2    4.90    1.30
  -9   7  -2    4.60    0.90
   9  -7   2    4.60    0.80
   9  -7   2    5.80    1.20
  -2   9   2    4.80    1.20
   9  -7   2    5.60    1.60
  -2   9   2    5.20    1.80
  -7  -2   2    4.80    1.50
  -7  -2   2    5.80    1.40
  -2   9   2    9.10    1.40
   1  -9  -2  205.98    7.90
   1  -9  -2  197.68    8.00
  -9   8  -2  201.38    8.00
   1  -9  -2  201.18    7.90
  -9   8  -2  201.38    7.30
   8   1  -2  192.38    8.00
  -9   8  -2  195.28    7.40
  -9   8  -2  213.98    8.00
   8   1  -2  213.28    8.60
  -8  -1   2  209.58    7.90
  -1   9   2  213.48    8.00
   9  -8   2  213.28    8.20
  -8  -1   2  213.48    8.10
  -1   9   2  213.08    8.00
   9  -8   2  210.68    7.90
  -8  -1   2  206.78    8.20
  -1   9   2  209.68    7.70
   0  -9  -2   25.20    2.50
   0  -9  -2   25.90    2.30
  -9   9  -2   26.60    1.50
  -9   9  -2   32.80    2.40
   9   0  -2   24.40    2.50
  -9   9  -2   27.30    2.20
  -9   9  -2   28.10    1.60
   9   0  -2   24.30    2.30
   0  -9  -2   22.70    2.20
  -9   0   2   21.60    2.70
  -9   0   2   27.40    2.30
   9  -9   2   27.80    2.10
   0   9   2   22.80    3.10
  -9   0   2   23.70    2.40
   9  -9   2   26.10    2.40
   0   9   2   23.20    2.00
  -9  10  -2  178.68    7.20
  10  -1  -2  179.78    7.20
  10  -1  -2  180.18    8.30
  -1  -9  -2  172.18    7.20
  -9  10  -2  173.98    7.10
  -1  -9  -2  176.48    7.10
  -1  -9  -2  178.48    7.10
  -9  10  -2  177.58    6.40
  -9  10  -2  167.68    6.30
 -10   1   2  169.28    7.40
   9 -10   2  180.58    7.00
 -10   1   2  177.98    7.00
   9 -10   2  185.48    6.60
   9 -10   2  186.58    7.50
   1   9   2  186.88    7.20
   1   9   2  174.38    7.20
 -10   1   2  180.28    7.30
  -9  11  -2   14.50    1.20
  -2  -9  -2   14.10    1.90
  -2  -9  -2   17.30    2.10
  -9  11  -2   17.30    1.30
  -2  -9  -2   12.40    1.90
  11  -2  -2   14.50    1.90
  -9  11  -2   15.70    1.90
   9 -11   2   17.70    1.90
   9 -11   2   18.00    1.50
   2   9   2   19.20    3.40
 -11   2   2   21.10    2.40
 -11   2   2   19.60    2.40
   2   9   2   20.10    2.10
 -11   2   2   18.00    2.20
   9 -11   2   15.00    2.00
  -9  12  -2    8.60    0.90
  12  -3  -2    7.80    2.20
  -3  -9  -2    5.80    2.10
  -9  12  -2    8.40    1.70
  12  -3  -2    6.20    1.60
  -3  -9  -2    7.80    1.80
  -3  -9  -2    9.10    2.00
   3   9   2    3.90    1.80
   9 -12   2    5.80    1.70
 -12   3   2   11.50    1.80
 -12   3   2    7.90    1.80
   9 -12   2    3.90    1.40
 -12   3   2    7.70    1.90
   3   9   2    4.50    1.50
   9 -12   2    7.60    1.10
  -9  13  -2   64.79    2.80
  -4  -9  -2   64.69    3.90
  13  -4  -2   63.39    4.20
  13  -4  -2   66.99    4.00
  -9  13  -2   66.19    3.70
  -4  -9  -2   66.99    4.00
  -4  -9  -2   65.39    4.00
   9 -13   2   75.99    4.00
   4   9   2   76.49    3.90
 -13   4   2   68.09    3.60
 -13   4   2   69.59    4.00
   9 -13   2   70.09    3.30
 -13   4   2   66.39    4.20
   9 -13   2   71.99    3.60
  -5  -9  -2   12.80    2.30
  -5  -9  -2    9.80    2.20
  -9  14  -2   10.50    1.80
  14  -5  -2   12.00    2.40
  -9  14  -2   11.20    1.20
  -5  -9  -2   13.00    2.30
 -14   5   2    9.20    1.90
 -14   5   2   10.00    2.30
 -14   5   2   15.30    2.50
   5   9   2   12.10    2.30
   9 -14   2    9.80    1.80
   9 -14   2   10.50    1.60
  15  -6  -2   26.20    3.30
  -6  -9  -2   30.00    3.60
  -6  -9  -2   25.80    2.90
  -6  -9  -2   28.90    3.30
  -9  15  -2   30.80    2.90
  -9  15  -2   26.90    2.00
   9 -15   2   25.80    2.90
   6   9   2   27.70    3.10
   9 -15   2   33.70    3.10
 -15   6   2   27.20    3.10
 -15   6   2   33.90    3.30
   9 -15   2   24.80    2.20
  -7  -9  -2   13.70    3.90
  -7  -9  -2   14.10    2.70
  -7  -9  -2   13.10    2.50
  -9  16  -2   12.90    1.60
  16  -7  -2   17.00    3.20
 -16   7   2   12.80    2.90
   9 -16   2   14.80    1.80
   9 -16   2   14.00    2.20
   7   9   2    7.90    2.30
   9 -16   2   16.40    2.60
 -16   7   2   16.00    2.30
  -9  17  -2   26.00    3.10
  -9  17  -2   24.30    2.30
  -8  -9  -2   22.80    3.30
  -8  -9  -2   24.10    3.20
  17  -8  -2   28.20    3.60
  -8  -9  -2   22.80    3.10
   8   9   2   23.30    3.20
   9 -17   2   28.30    3.40
   9 -17   2   24.90    3.00
 -17   8   2   31.10    3.70
 -17   8   2   27.80    3.10
   9 -17   2   25.50    2.70
  -9  -9  -2   17.70    3.00
  -9  -9  -2   16.40    2.80
  18  -9  -2   16.00    3.10
  -9  18  -2   18.50    1.90
  -9  18  -2   18.10    3.90
 -18   9   2   13.80    3.50
   9   9   2   20.80    3.00
   9 -18   2   14.90    2.70
   9 -18   2   17.50    2.40
 -18   9   2   16.50    2.40
   9 -18   2   18.30    2.80
  19 -10  -2   20.90    3.80
  -9  19  -2   21.20    2.90
 -10  -9  -2   23.10    3.40
 -10  -9  -2   21.50    3.00
   9 -19   2   17.20    2.50
 -19  10   2   21.90    3.40
   9 -19   2   16.10    2.80
 -19  10   2   16.80    2.40
  10   9   2   20.10    3.00
   9 -19   2   16.90    2.50
 -10  -8  -2   51.79    4.40
 -10  -8  -2   43.70    4.00
  -8  18  -2   53.79    4.90
  18 -10  -2   48.00    4.40
 -18  10   2   50.49    3.80
  10   8   2   50.29    4.20
 -18  10   2   45.60    4.20
   8 -18   2   49.50    3.70
   8 -18   2   48.40    3.70
   8 -18   2   54.39    4.50
 -10  -7  -2   36.00    4.40
 -10  -7  -2   26.80    3.60
 -10  -7  -2   28.10    3.60
  17 -10  -2   33.10    4.00
  10   7   2   29.90    3.70
 -17  10   2   39.00    3.30
   7 -17   2   31.30    3.90
   7 -17   2   26.40    3.20
   7 -17   2   39.00    3.20
 -17  10   2   41.00    3.80
  -6  16  -2   23.00    2.80
 -10  -6  -2   31.20    3.60
 -10  -6  -2   33.80    3.50
 -10  -6  -2   23.70    3.40
  16 -10  -2   20.90    3.40
   6 -16   2   24.70    2.90
  10   6   2   26.50    3.30
 -16  10   2   25.90    3.20
   6 -16   2   29.20    3.40
   6 -16   2   23.50    2.70
 -16  10   2   24.20    2.50
  -5  15  -2  138.39    6.00
 -10  -5  -2  146.79    6.40
 -10  -5  -2  128.79    6.30
 -10  -5  -2  124.59    6.30
  15 -10  -2  137.19    6.70
 -15  10   2  120.09    5.50
 -15  10   2  126.39    6.30
  10   5   2  119.59    6.20
   5 -15   2  124.59    5.80
   5 -15   2  116.09    5.80
   5 -15   2  120.89    6.00
 -15  10   2  120.99    6.20
  -4  14  -2   60.99    3.70
 -10  -4  -2   66.89    4.00
  14 -10  -2   64.89    3.70
 -10  -4  -2   67.19    3.90
  14 -10  -2   66.69    4.30
 -10  -4  -2   67.49    4.30
 -14  10   2   58.99    3.30
  10   4   2   51.69    4.20
 -14  10   2   60.09    3.60
   4 -14   2   57.89    3.60
 -14  10   2   60.59    3.90
   4 -14   2   59.49    3.80
   4 -14   2   56.49    3.70
 -10  -3  -2   31.50    2.90
  -3  13  -2   34.70    2.80
  13 -10  -2   34.00    3.20
 -10  -3  -2   36.10    3.00
  13 -10  -2   34.70    2.80
 -10  -3  -2   35.20    3.20
 -13  10   2   36.50    2.90
  10   3   2   35.50    3.40
   3 -13   2   33.80    3.00
  10   3   2   32.20    3.10
 -13  10   2   34.00    3.20
   3 -13   2   27.10    2.70
 -13  10   2   35.20    2.50
   3 -13   2   31.30    2.80
 -13  10   2   34.20    2.90
  12 -10  -2   18.50    2.30
 -10  -2  -2   13.30    2.00
 -10  -2  -2   13.40    3.20
 -10  -2  -2   13.70    2.10
  -2  12  -2    9.90    1.70
   2 -12   2   10.10    1.70
  10   2   2   14.60    2.20
 -12  10   2   15.20    2.00
 -12  10   2   13.00    1.70
 -12  10   2   14.50    2.00
  10   2   2   14.40    1.90
 -12  10   2   13.10    1.70
   2 -12   2   12.60    1.90
   2 -12   2   11.30    1.70
  11 -10  -2   12.10    2.00
 -10  -1  -2   15.80    2.50
  11 -10  -2   15.10    2.00
 -10  -1  -2   13.70    2.00
  -1  11  -2   17.60    1.90
  11 -10  -2   15.00    1.90
   1 -11   2   10.90    1.70
 -11  10   2   14.70    1.80
 -11  10   2   11.70    1.80
  10   1   2   10.30    2.10
  10   1   2   13.70    2.10
   1 -11   2   13.00    1.70
   1 -11   2    9.60    1.60
 -11  10   2   14.60    1.60
 -11  10   2   10.90    1.80
  10 -10  -2  141.99    6.10
 -10   0  -2  124.99    5.70
 -10   0  -2  133.49    5.60
   0  10  -2  133.99    5.60
 -10   0  -2  132.79    6.00
  10 -10  -2  136.19    5.60
  10 -10  -2  129.99    5.50
  10   0   2  130.69    5.70
 -10  10   2  130.59    5.80
   0 -10   2  121.99    5.40
   0 -10   2  137.19    5.60
 -10  10   2  130.39    5.40
 -10  10   2  123.09    5.60
 -10  10   2  128.29    5.30
   0 -10   2  127.99    5.70
  10   0   2  136.19    6.00
 -10   1  -2  165.48    7.00
   9 -10  -2  165.68    7.00
   9 -10  -2  162.38    6.70
 -10   1  -2  179.38    7.00
   1   9  -2  182.58    7.80
 -10   1  -2  162.98    6.70
   1   9  -2  170.78    6.70
  -1  -9   2  157.58    6.80
  -9  10   2  162.58    6.80
  -9  10   2  165.78    6.50
  -9  10   2  162.88    6.80
  10  -1   2  166.18    6.80
  10  -1   2  165.58    7.10
  -1  -9   2  168.68    6.70
  -1  -9   2  172.28    6.70
 -10   2  -2  129.99    5.50
   2   8  -2  115.29    5.10
 -10   2  -2  120.09    5.00
   8 -10  -2  113.09    5.10
   8 -10  -2  124.29    5.50
 -10   2  -2  113.89    5.40
   2   8  -2  115.99    5.20
  -8  10   2  123.99    4.80
  10  -2   2  116.89    5.10
  10  -2   2  125.19    5.70
  -2  -8   2  116.89    5.30
  -2  -8   2  129.69    5.20
  -2  -8   2  125.59    5.10
  -8  10   2  118.99    5.70
  -8  10   2  128.59    6.60
  10  -2   2  121.29    5.30
   3   7  -2   61.79    3.40
   7 -10  -2   61.69    3.20
   3   7  -2   63.29    3.40
 -10   3  -2   61.69    3.50
   7 -10  -2   65.69    3.60
 -10   3  -2   74.79    3.80
 -10   3  -2   67.49    3.20
   7 -10  -2   57.39    3.60
  -7  10   2   72.49    3.00
  10  -3   2   67.59    3.50
  -3  -7   2   61.79    3.40
  10  -3   2   68.29    3.90
  -3  -7   2   72.59    3.40
  -3  -7   2   67.79    3.30
  10  -3   2   64.39    3.30
  -7  10   2   64.79    3.30
  -7  10   2   66.19    3.50
   4   6  -2  225.28    8.60
 -10   4  -2  222.98    8.30
   6 -10  -2  225.78    8.70
   6 -10  -2  221.38    8.50
 -10   4  -2  227.58    8.90
   6 -10  -2  225.48    8.50
 -10   4  -2  234.48    9.20
   4   6  -2  223.88    8.60
  10  -4   2  239.18    9.00
  -4  -6   2  215.58    8.70
  10  -4   2  223.68    8.60
  10  -4   2  226.68    8.40
  -6  10   2  231.08    9.00
  -6  10   2  229.48    8.50
  -4  -6   2  221.08    8.50
  -4  -6   2  222.58    8.60
  -6  10   2  227.58    8.20
   5 -10  -2  136.49    5.70
 -10   5  -2  131.89    6.50
   5   5  -2  139.39    5.80
   5 -10  -2  138.39    5.80
 -10   5  -2  141.69    6.10
   5   5  -2  129.49    5.80
   5 -10  -2  136.69    5.90
 -10   5  -2  140.99    5.50
  -5  -5   2  155.78    5.80
  10  -5   2  154.98    6.20
  -5  10   2  139.29    5.80
  -5  -5   2  153.98    6.00
  10  -5   2  147.89    5.90
  -5  10   2  152.38    5.50
  -5  -5   2  146.59    6.00
  10  -5   2  147.09    5.60
   6   4  -2  677.23   23.60
   4 -10  -2  656.43   23.40
   4 -10  -2  657.43   23.50
   6   4  -2  657.93   23.60
 -10   6  -2  651.23   23.50
 -10   6  -2  690.33   24.90
   4 -10  -2  663.23   23.50
 -10   6  -2  663.43   23.60
  10  -6   2  668.83   23.20
  -6  -4   2  674.23   23.50
  10  -6   2  690.63   23.60
  -4  10   2  704.93   24.60
  10  -6   2  700.93   23.90
  -4  10   2  688.33   23.60
  -4  10   2  660.83   23.20
  -6  -4   2  673.93   23.70
  -6  -4   2  667.73   23.40
 -10   7  -2  784.82   27.80
 -10   7  -2  805.22   27.50
   7   3  -2  799.42   27.80
 -10   7  -2  818.22   27.80
   3 -10  -2  777.92   27.60
   3 -10  -2  833.82   27.60
   7   3  -2  828.02   27.70
   3 -10  -2  807.32   27.60
  -7  -3   2  810.32   27.70
  10  -7   2  785.82   27.30
  -7  -3   2  778.92   27.90
  10  -7   2  779.82   27.90
  -3  10   2  773.72   27.40
  -3  10   2  792.92   28.50
  10  -7   2  806.22   27.70
  -3  10   2  780.82   28.80
  -7  -3   2  764.92   27.60
   8   2  -2  595.64   21.00
 -10   8  -2  574.64   20.80
   8   2  -2  617.04   20.90
 -10   8  -2  579.94   20.10
 -10   8  -2  610.44   20.90
   2 -10  -2  580.84   20.70
   2 -10  -2  568.64   20.70
   2 -10  -2  600.24   20.70
 -10   8  -2  588.94   20.40
  -8  -2   2  572.84   20.70
  10  -8   2  596.44   20.80
  -2  10   2  592.84   21.70
  -2  10   2  592.04   20.80
  10  -8   2  591.34   21.10
  -8  -2   2  595.94   20.80
  -8  -2   2  586.44   21.00
  -2  10   2  571.34   20.50
   1 -10  -2  177.18    7.10
   9   1  -2  181.88    7.50
 -10   9  -2  177.68    6.50
   1 -10  -2  180.58    7.10
 -10   9  -2  171.68    7.20
   1 -10  -2  182.98    7.20
   9   1  -2  185.18    7.20
 -10   9  -2  178.88    7.10
 -10   9  -2  177.48    6.40
  -1  10   2  172.18    7.10
  10  -9   2  180.38    7.50
  -9  -1   2  181.18    7.30
  -9  -1   2  169.08    7.30
  -9  -1   2  178.18    7.20
  -1  10   2  170.18    7.30
  10  -9   2  171.08    6.90
  -1  10   2  179.68    7.10
 -10  10  -2  107.19    4.90
   0 -10  -2   98.99    4.80
   0 -10  -2  102.59    4.80
   0 -10  -2  107.59    4.80
  10   0  -2  101.19    4.70
 -10  10  -2   98.99    3.90
  10   0  -2  108.39    5.80
 -10  10  -2   99.19    3.90
 -10  10  -2   98.39    5.10
   0  10   2  101.69    4.60
 -10   0   2  106.09    4.80
 -10   0   2   97.19    4.80
 -10   0   2   92.99    4.80
  10 -10   2   99.89    4.50
  10 -10   2  107.99    5.00
   0  10   2  101.89    4.70
  -1 -10  -2  219.98    8.80
  -1 -10  -2  224.48    8.70
  11  -1  -2  215.48   10.80
  -1 -10  -2  234.88    8.80
 -10  11  -2  227.58    7.90
  11  -1  -2  225.38    8.80
 -10  11  -2  226.18    8.70
 -10  11  -2  216.18    7.90
  10 -11   2  210.88    8.50
   1  10   2  231.48    8.80
  10 -11   2  219.88    9.00
 -11   1   2  228.38    8.90
 -11   1   2  222.98    8.60
 -11   1   2  216.28    9.00
  -2 -10  -2   20.60    2.30
  12  -2  -2   19.20    2.40
  -2 -10  -2   18.40    2.30
 -10  12  -2   17.90    1.30
  -2 -10  -2   20.80    2.70
 -10  12  -2   19.80    1.50
 -10  12  -2   17.30    2.10
  12  -2  -2   16.90    2.30
 -12   2   2   24.00    2.50
  10 -12   2   21.30    2.40
   2  10   2   23.40    2.60
 -12   2   2   23.80    2.80
  10 -12   2   22.10    1.60
  10 -12   2   22.90    2.30
 -12   2   2   23.80    2.40
 -10  13  -2   78.79    3.20
  -3 -10  -2   72.09    4.20
 -10  13  -2   81.79    3.40
  -3 -10  -2   83.49    4.20
  -3 -10  -2   80.69    4.30
 -10  13  -2   81.19    4.30
  13  -3  -2   78.79    4.60
 -13   3   2   87.59    4.50
   3  10   2   83.79    4.20
 -13   3   2   74.59    4.40
  10 -13   2   81.49    3.50
  10 -13   2   80.89    4.60
  10 -13   2   78.99    4.10
 -10  14  -2   71.09    4.20
  -4 -10  -2   63.69    4.00
 -10  14  -2   61.49    2.90
  14  -4  -2   74.89    4.80
  -4 -10  -2   61.59    4.00
  -4 -10  -2   66.69    4.40
  10 -14   2   73.79    4.00
 -14   4   2   71.69    4.10
  10 -14   2   73.49    3.50
   4  10   2   74.79    4.30
 -14   4   2   68.39    4.30
 -14   4   2   80.39    4.40
  -5 -10  -2   26.80    2.90
 -10  15  -2   24.60    1.80
 -10  15  -2   28.50    4.20
  15  -5  -2   25.50    3.10
  -5 -10  -2   26.80    3.30
 -15   5   2   25.90    3.00
   5  10   2   27.20    3.00
 -15   5   2   27.90    3.00
 -15   5   2   27.10    3.20
  10 -15   2   30.80    3.50
  10 -15   2   34.40    3.10
  16  -6  -2  119.79    6.60
 -10  16  -2  106.39    4.50
  -6 -10  -2  113.09    6.40
 -10  16  -2  108.79    5.70
  -6 -10  -2  101.99    5.80
  -6 -10  -2  112.49    5.80
  10 -16   2  107.79    5.40
  10 -16   2  119.29    5.90
   6  10   2  105.59    5.60
 -16   6   2  121.39    5.50
  10 -16   2  113.19    4.90
 -16   6   2  113.29    6.00
  -7 -10  -2   69.89    4.80
 -10  17  -2   78.69    5.20
  -7 -10  -2   79.09    5.10
  17  -7  -2   76.79    5.30
 -10  17  -2   69.49    3.60
  -7 -10  -2   68.09    4.60
   7  10   2   73.49    4.80
  10 -17   2   75.49    3.90
  10 -17   2   77.19    4.90
 -17   7   2   88.29    4.60
  10 -17   2   77.99    4.70
  -8 -10  -2   20.90    3.60
  -8 -10  -2   26.10    3.20
  -8 -10  -2   29.10    3.50
  18  -8  -2   27.70    3.90
 -10  18  -2   30.30    2.40
  10 -18   2   26.00    3.40
 -18   8   2   26.80    3.20
  10 -18   2   27.00    3.00
 -18   8   2   31.20    5.00
   8  10   2   29.00    3.50
  10 -18   2   30.10    2.50
  -9 -10  -2    5.00    2.60
  -9 -10  -2    6.50    2.50
 -10  19  -2    5.90    1.50
 -10  19  -2   10.20    2.50
  10 -19   2    6.30    2.30
   9  10   2    6.50    2.50
  10 -19   2   10.20    2.60
 -19   9   2    7.50    2.70
  10 -19   2    5.00    1.50
 -19   9   2    6.90    2.30
 -10 -10  -2   10.70    2.90
  20 -10  -2   18.00    3.70
 -10  20  -2   11.90    2.80
 -10 -10  -2   13.20    2.70
  10 -20   2   12.60    1.90
  10 -20   2   10.60    2.70
 -20  10   2    8.20    2.20
  10  10   2    9.00    2.90
 -20  10   2    7.30    3.10
 -11 -10  -2   10.60    3.00
 -10  21  -2    6.20    2.60
  21 -11  -2    8.80    3.10
 -11 -10  -2    7.20    3.10
 -21  11   2   13.00    3.00
  10 -21   2    9.40    1.90
  11  10   2    7.30    3.00
 -11  -9  -2   14.20    2.90
  20 -11  -2    9.10    3.10
  -9  20  -2   10.80    2.70
 -11  -9  -2    7.40    2.80
   9 -20   2   11.40    2.10
  11   9   2    9.60    3.00
   9 -20   2   10.50    2.70
 -20  11   2    8.70    2.90
 -20  11   2    9.40    2.30
 -11  -8  -2   22.30    3.40
 -11  -8  -2   20.80    3.00
  -8  19  -2   19.70    3.20
  19 -11  -2   16.30    3.60
 -19  11   2   15.70    3.20
 -19  11   2   16.40    2.50
   8 -19   2   20.60    2.70
   8 -19   2   14.00    2.60
  11   8   2   13.20    3.00
   8 -19   2   16.00    2.80
  -7  18  -2   19.80    3.20
 -11  -7  -2   14.90    2.80
 -11  -7  -2   15.90    3.00
 -18  11   2   19.00    3.30
   7 -18   2   16.80    2.40
   7 -18   2   20.00    2.70
  11   7   2   20.80    3.10
   7 -18   2   23.90    2.90
 -18  11   2   13.60    3.30
  17 -11  -2  115.19    7.00
 -11  -6  -2  128.19    6.50
 -11  -6  -2  106.09    6.10
  -6  17  -2  126.39    8.00
 -17  11   2  114.09    6.30
  11   6   2  106.99    6.10
   6 -17   2  116.19    5.70
   6 -17   2  109.29    6.00
   6 -17   2  104.19    5.70
 -17  11   2  119.69    5.50
  -5  16  -2    2.50    2.10
  16 -11  -2    3.20    2.70
 -11  -5  -2   -0.40    2.20
 -11  -5  -2    2.20    2.30
 -11  -5  -2    0.90    2.40
  11   5   2    3.70    2.20
 -16  11   2    2.30    2.20
   5 -16   2    1.80    2.00
   5 -16   2    2.60    1.90
 -16  11   2   -1.20    1.60
   5 -16   2    0.10    1.90
 -11  -4  -2    5.10    2.10
  -4  15  -2    5.50    2.00
  15 -11  -2    7.00    2.00
 -11  -4  -2    6.90    2.20
  15 -11  -2    9.10    2.50
 -11  -4  -2    7.00    2.50
   4 -15   2    7.90    2.00
  11   4   2   10.00    2.70
   4 -15   2   11.40    2.20
 -15  11   2   12.20    2.60
 -15  11   2    7.10    1.80
   4 -15   2    7.70    2.00
 -15  11   2    9.10    1.90
 -11  -3  -2   23.60    2.90
  -3  14  -2   19.70    2.40
  14 -11  -2   22.50    2.90
 -11  -3  -2   22.00    2.90
 -11  -3  -2   20.60    2.80
  14 -11  -2   19.60    2.50
   3 -14   2   19.00    2.30
 -14  11   2   16.80    2.50
 -14  11   2   18.00    2.00
 -14  11   2   21.20    2.20
   3 -14   2   17.90    2.30
  11   3   2   19.60    2.60
   3 -14   2   16.70    2.30
 -11  -2  -2  117.89    5.50
 -11  -2  -2  105.69    5.40
 -11  -2  -2  110.59    5.10
  13 -11  -2  104.69    5.00
  -2  13  -2  101.69    4.80
  13 -11  -2  109.39    5.60
 -13  11   2  100.29    5.10
 -13  11   2  107.09    4.70
   2 -13   2  103.49    5.00
   2 -13   2  110.09    6.50
   2 -13   2  104.89    5.00
  11   2   2  106.39    5.50
  11   2   2  105.69    5.30
 -13  11   2  104.19    5.30
 -11  -1  -2   42.70    3.30
 -11  -1  -2   48.40    3.50
  -1  12  -2   44.50    2.80
 -11  -1  -2   47.40    3.60
  12 -11  -2   49.10    3.80
 -12  11   2   45.70    3.30
  11   1   2   44.50    3.30
 -12  11   2   42.90    2.60
   1 -12   2   37.30    3.10
   1 -12   2   45.30    3.10
 -12  11   2   42.30    3.40
 -12  11   2   42.30    2.60
  11   1   2   44.50    3.70
   1 -12   2   40.00    3.00
  11 -11  -2  137.39    6.50
  11 -11  -2  142.99    6.00
 -11   0  -2  134.29    6.40
 -11   0  -2  139.29    6.50
 -11   0  -2  142.59    6.10
   0  11  -2  139.29    5.90
  11 -11  -2  142.69    5.80
   0 -11   2  137.79    5.90
 -11  11   2  142.39    5.70
 -11  11   2  136.19    5.60
 -11  11   2  132.79    6.10
   0 -11   2  131.29    5.80
   0 -11   2  131.59    6.00
 -11  11   2  143.39    6.20
  11   0   2  146.89    6.60
  11   0   2  137.69    6.00
 -11   1  -2   11.00    1.90
 -11   1  -2   12.90    2.10
  10 -11  -2   14.10    1.90
  10 -11  -2   13.70    2.10
  10 -11  -2   14.80    1.90
 -11   1  -2   13.80    2.00
   1  10  -2   14.50    1.90
 -10  11   2   14.90    2.00
 -10  11   2   17.70    2.00
  -1 -10   2   12.10    1.70
  11  -1   2   19.40    2.30
  -1 -10   2   14.50    1.90
  -1 -10   2   14.20    2.00
  11  -1   2   17.20    2.20
 -10  11   2   16.00    1.70
 -10  11   2   14.50    1.70
 -11   2  -2  299.87   11.40
   9 -11  -2  297.07   11.40
   2   9  -2  305.17   11.60
   9 -11  -2  299.57   11.50
 -11   2  -2  290.77   12.00
   9 -11  -2  304.87   11.80
 -11   2  -2  306.07   11.70
  -2  -9   2  325.17   11.50
  11  -2   2  321.67   11.70
  -2  -9   2  314.27   11.70
  -2  -9   2  325.17   11.60
  -9  11   2  316.77   11.60
  11  -2   2  340.47   12.20
  -9  11   2  321.07   11.30
  -9  11   2  310.17   11.60
   8 -11  -2   -0.30    1.00
   8 -11  -2   -2.30    1.10
 -11   3  -2   -2.10    1.50
 -11   3  -2    0.00    1.20
   3   8  -2   -3.60    1.30
 -11   3  -2   -0.40    1.40
  -3  -8   2   -2.90    1.30
  11  -3   2   -2.80    1.70
  -8  11   2   -3.30    1.20
  -8  11   2   -0.30    0.90
  11  -3   2   -0.50    1.20
  -3  -8   2   -2.00    1.30
  11  -3   2   -0.60    1.40
  -3  -8   2   -3.50    1.30
  -8  11   2   -1.00    1.50
   7 -11  -2  537.75   19.40
   4   7  -2  539.65   19.80
   7 -11  -2  522.25   19.60
 -11   4  -2  540.55   20.20
   7 -11  -2  550.64   19.40
 -11   4  -2  532.25   19.20
   4   7  -2  551.64   19.50
 -11   4  -2  513.35   19.70
  11  -4   2  554.34   19.30
  -7  11   2  575.74   20.10
  11  -4   2  560.44   19.90
  -4  -7   2  584.24   19.50
  -7  11   2  550.54   19.10
  -4  -7   2  585.34   19.50
  11  -4   2  553.04   19.60
  -4  -7   2  548.75   19.60
  -7  11   2  552.54   19.50
   6 -11  -2  197.78    7.60
   5   6  -2  187.48    7.40
   6 -11  -2  187.08    7.30
 -11   5  -2  188.78    7.70
   5   6  -2  198.08    7.60
 -11   5  -2  199.48    7.10
   6 -11  -2  187.58    7.40
 -11   5  -2  188.78    7.80
  -6  11   2  179.18    7.30
  11  -5   2  189.28    7.30
  11  -5   2  191.78    8.00
  -6  11   2  184.28    7.00
  -5  -6   2  185.58    7.40
  -6  11   2  187.08    7.40
  11  -5   2  186.08    7.50
  -5  -6   2  183.18    7.60
  -5  -6   2  183.28    7.50
 -11   6  -2  324.37   11.90
   6   5  -2  324.87   12.00
 -11   6  -2  310.37   11.40
   5 -11  -2  311.27   11.80
   6   5  -2  325.17   11.90
   5 -11  -2  312.17   11.70
 -11   6  -2  318.27   12.00
 -11   6  -2  311.17   12.00
   5 -11  -2  318.47   11.70
  -6  -5   2  312.77   12.00
  -5  11   2  326.47   11.80
  -6  -5   2  338.97   11.80
  -5  11   2  313.57   11.80
  11  -6   2  321.37   11.80
  11  -6   2  323.07   11.50
  -6  -5   2  326.47   11.80
  -5  11   2  324.77   11.80
  11  -6   2  317.87   12.20
 -11   7  -2  249.68    9.40
 -11   7  -2  255.07    9.10
   7   4  -2  261.17    9.80
   4 -11  -2  259.27    9.50
   7   4  -2  255.57    9.60
   4 -11  -2  255.57    9.60
 -11   7  -2  248.28    9.80
   4 -11  -2  253.17    9.60
  -4  11   2  236.68    9.10
  -7  -4   2  242.38    9.80
  -4  11   2  248.78    9.40
  -7  -4   2  251.57    9.70
  11  -7   2  249.68    9.60
  11  -7   2  241.28    9.20
  11  -7   2  261.77    9.90
  -7  -4   2  243.18    9.50
   3 -11  -2  161.88    6.60
   3 -11  -2  158.28    6.70
   8   3  -2  169.08    6.80
   3 -11  -2  155.88    6.60
 -11   8  -2  167.68    7.60
 -11   8  -2  161.58    6.10
 -11   8  -2  164.28    6.40
   8   3  -2  161.18    6.90
 -11   8  -2  156.68    6.70
  11  -8   2  164.78    6.20
  -8  -3   2  158.48    7.00
  -8  -3   2  170.68    6.80
  11  -8   2  165.58    6.60
  -3  11   2  168.88    6.60
  -3  11   2  160.48    6.60
  -8  -3   2  158.48    6.60
  -3  11   2  157.68    6.30
  11  -8   2  170.28    7.10
   2 -11  -2   16.50    2.10
   2 -11  -2   19.20    2.20
   2 -11  -2   18.60    2.10
 -11   9  -2   24.60    2.60
 -11   9  -2   20.20    1.50
 -11   9  -2   19.50    1.50
   9   2  -2   15.90    2.10
   9   2  -2   18.40    2.20
 -11   9  -2   18.20    2.10
  -9  -2   2   15.50    2.20
  -2  11   2   12.30    1.80
  11  -9   2   13.20    2.00
  -9  -2   2   12.00    1.90
  -2  11   2   14.00    1.90
  -9  -2   2   14.10    2.10
  11  -9   2   15.30    1.90
 -11  10  -2  219.28    8.10
  10   1  -2  222.38    9.20
   1 -11  -2  221.98    8.80
 -11  10  -2  231.28    8.80
   1 -11  -2  220.88    8.80
 -11  10  -2  222.98    8.00
   1 -11  -2  237.58    8.90
  10   1  -2  224.58    8.90
 -10  -1   2  221.58   10.00
  11 -10   2  231.58    9.20
  -1  11   2  218.48    8.70
  11 -10   2  228.88    8.70
  -1  11   2  224.68    9.90
 -10  -1   2  219.28    9.10
 -10  -1   2  214.98    8.80
   0 -11  -2   23.70    2.60
   0 -11  -2   23.20    2.50
   0 -11  -2   22.40    2.30
 -11  11  -2   24.20    1.50
  11   0  -2   31.30    4.50
 -11  11  -2   23.80    1.50
 -11  11  -2   23.00    2.50
  11 -11   2   22.10    2.20
  11 -11   2   23.70    2.90
   0  11   2   23.40    2.90
 -11   0   2   25.20    2.60
 -11   0   2   19.90    2.60
 -11   0   2   23.40    2.60
  -1 -11  -2   43.90    3.10
 -11  12  -2   40.20    3.00
 -11  12  -2   42.60    2.10
 -11  12  -2   41.90    1.90
  -1 -11  -2   39.90    3.10
  12  -1  -2   46.80    3.60
 -12   1   2   39.80    3.10
  11 -12   2   39.60    3.10
 -12   1   2   37.50    3.30
   1  11   2   41.90    2.90
  11 -12   2   45.30    2.90
 -12   1   2   38.50    3.00
  13  -2  -2   13.00    2.30
 -11  13  -2   13.30    1.20
  -2 -11  -2   11.10    2.00
 -11  13  -2   11.80    1.30
 -11  13  -2   11.90    3.20
  -2 -11  -2   16.10    2.10
  -2 -11  -2   13.20    2.30
 -13   2   2   14.60    2.10
  11 -13   2   17.80    2.50
 -13   2   2   18.60    2.40
   2  11   2   18.80    2.30
 -13   2   2   15.80    2.30
  11 -13   2   16.30    1.50
  -3 -11  -2   10.70    2.30
  -3 -11  -2   13.10    2.40
 -11  14  -2   15.40    1.40
 -11  14  -2   15.80    3.70
 -11  14  -2   13.60    1.50
  -3 -11  -2   11.20    2.20
  11 -14   2   13.10    1.60
 -14   3   2   14.70    2.40
  11 -14   2   17.90    2.70
  11 -14   2   16.10    2.00
 -14   3   2   15.40    2.70
 -14   3   2   17.30    2.40
   3  11   2   16.90    2.50
 -11  15  -2   50.19    3.80
 -11  15  -2   50.69    2.50
  -4 -11  -2   56.39    4.00
  -4 -11  -2   62.09    4.70
  15  -4  -2   55.09    4.30
 -15   4   2   58.59    4.50
  11 -15   2   58.19    4.10
  11 -15   2   51.89    3.50
  11 -15   2   52.39    3.40
   4  11   2   59.09    3.80
 -15   4   2   52.99    4.10
 -15   4   2   55.59    3.60
  -5 -11  -2    0.60    2.10
 -11  16  -2   -0.20    1.00
 -11  16  -2    1.90    2.30
  -5 -11  -2    3.40    2.50
  -5 -11  -2   -1.10    1.90
  16  -5  -2    1.00    2.70
  11 -16   2    1.50    2.40
   5  11   2   -2.10    2.10
 -16   5   2    2.60    2.30
  11 -16   2   -0.60    2.00
 -16   5   2    3.60    2.10
  11 -16   2    0.10    1.40
  17  -6  -2   56.09    5.20
  -6 -11  -2   65.39    4.60
  -6 -11  -2   57.89    4.30
 -11  17  -2   55.69    2.90
  -6 -11  -2   64.89    4.80
  11 -17   2   57.39    3.90
  11 -17   2   64.69    4.60
   6  11   2   59.69    4.30
  11 -17   2   58.09    3.30
 -11  18  -2    0.10    2.10
 -11  18  -2    1.40    1.20
  -7 -11  -2    1.30    2.40
  -7 -11  -2   -0.30    2.50
  18  -7  -2    2.70    3.10
  -7 -11  -2    1.00    2.10
 -18   7   2   -3.30    2.60
  11 -18   2    2.60    1.90
 -18   7   2    3.60    2.20
  11 -18   2    3.10    2.30
   7  11   2   -0.60    2.10
  19  -8  -2   10.30    3.60
  -8 -11  -2   13.50    2.70
 -11  19  -2   13.20    1.70
  -8 -11  -2    9.20    2.80
 -11  19  -2   11.80    2.70
  11 -19   2   16.70    2.00
  11 -19   2    8.70    2.80
   8  11   2   11.90    2.90
 -19   8   2   13.80    2.50
 -19   8   2    9.90    2.90
  11 -19   2    8.10    2.50
  -9 -11  -2   -0.80    2.10
  20  -9  -2    0.80    2.60
 -11  20  -2   -1.70    2.30
  -9 -11  -2    1.90    2.60
  11 -20   2    1.10    1.30
  11 -20   2    2.20    2.40
   9  11   2   -4.70    2.10
 -20   9   2   -2.70    1.90
 -20   9   2    2.60    2.60
 -10 -11  -2    7.20    2.60
  21 -10  -2    3.60    3.30
 -11  21  -2    5.00    2.60
 -10 -11  -2    3.80    3.00
 -21  10   2    1.20    2.10
  10  11   2    4.90    2.50
  11 -21   2    4.00    1.60
  11 -21   2    0.80    2.80
 -21  10   2    1.40    3.10
  22 -11  -2    2.70    3.10
 -11  22  -2    4.30    2.60
 -11 -11  -2    3.10    2.80
 -11 -11  -2    3.30    2.90
  11 -22   2    4.10    1.70
  11  11   2    6.80    3.00
 -22  11   2    0.20    2.20
 -22  11   2    5.40    3.00
  11 -22   2    7.70    3.10
 -10  22  -2    7.60    2.80
 -12 -10  -2    6.80    3.00
  22 -12  -2    8.60    3.60
 -12 -10  -2    8.60    2.80
 -22  12   2    2.20    2.20
  10 -22   2    3.90    2.60
 -22  12   2    5.30    3.10
  12  10   2   12.70    3.60
 -12  -9  -2   12.30    2.70
  -9  21  -2    3.10    2.50
 -12  -9  -2   10.40    3.30
  21 -12  -2   11.70    3.80
 -21  12   2    5.70    2.80
  12   9   2    9.00    2.70
 -21  12   2    9.30    2.20
 -12  -8  -2    6.70    2.50
  -8  20  -2    2.40    2.20
 -12  -8  -2    5.20    2.70
  20 -12  -2    5.40    3.20
  12   8   2    0.40    2.30
 -20  12   2    2.10    1.90
   8 -20   2    4.70    2.60
 -20  12   2    1.30    2.60
  -7  19  -2   30.60    3.90
  19 -12  -2   25.70    3.70
 -12  -7  -2   33.30    4.00
 -12  -7  -2   36.80    4.20
 -19  12   2   22.80    3.10
   7 -19   2   28.10    3.80
   7 -19   2   30.60    3.60
  12   7   2   29.30    3.70
   7 -19   2   31.60    3.50
  18 -12  -2   42.30    4.90
 -12  -6  -2   45.50    5.10
  -6  18  -2   43.40    4.40
 -12  -6  -2   42.90    3.90
 -18  12   2   44.20    4.20
 -18  12   2   41.60    3.30
   6 -18   2   40.00    3.80
   6 -18   2   38.90    3.70
  12   6   2   45.80    4.10
   6 -18   2   34.90    4.30
 -12  -5  -2   28.20    3.70
 -12  -5  -2   39.30    3.90
  17 -12  -2   30.80    4.20
  -5  17  -2   33.60    4.10
   5 -17   2   31.10    3.20
  12   5   2   25.90    3.30
 -17  12   2   35.50    2.90
   5 -17   2   36.70    3.50
 -17  12   2   30.90    3.80
  16 -12  -2    9.90    2.90
 -12  -4  -2    3.50    2.60
  -4  16  -2    3.90    2.00
 -16  12   2    8.60    1.80
  12   4   2    7.80    2.50
 -16  12   2   11.10    2.50
   4 -16   2    7.70    2.30
 -16  12   2   13.40    1.90
   4 -16   2   11.10    2.50
 -12  -3  -2   42.00    3.60
 -12  -3  -2   39.60    3.90
  -3  15  -2   42.50    3.10
  15 -12  -2   39.70    3.30
 -12  -3  -2   34.20    3.60
  15 -12  -2   38.00    3.80
   3 -15   2   36.10    3.10
 -15  12   2   32.60    3.80
 -15  12   2   31.80    2.80
  12   3   2   38.90    4.10
   3 -15   2   38.20    5.00
   3 -15   2   41.40    3.60
 -15  12   2   29.50    2.80
 -12  -2  -2   32.40    3.60
  14 -12  -2   24.40    2.70
  -2  14  -2   24.40    2.60
 -12  -2  -2   27.40    3.10
  14 -12  -2   25.30    3.10
 -12  -2  -2   22.00    2.90
 -14  12   2   23.40    2.80
 -14  12   2   26.60    3.10
   2 -14   2   27.30    3.10
  12   2   2   28.30    3.30
   2 -14   2   20.10    4.20
 -14  12   2   24.30    2.60
   2 -14   2   20.50    2.70
  13 -12  -2   30.70    3.30
 -12  -1  -2   34.30    3.00
  13 -12  -2   30.00    3.00
  -1  13  -2   31.30    2.90
 -12  -1  -2   28.30    3.40
 -12  -1  -2   32.90    3.20
   1 -13   2   36.00    2.90
  12   1   2   38.10    3.70
  12   1   2   38.40    4.40
 -13  12   2   33.70    2.50
   1 -13   2   27.40    3.30
 -13  12   2   33.60    2.60
   1 -13   2   39.80    3.10
 -13  12   2   37.20    3.20
  12 -12  -2   52.49    3.10
  12 -12  -2   48.50    3.70
   0  12  -2   47.00    3.10
 -12   0  -2   49.99    3.30
 -12   0  -2   42.90    3.40
 -12   0  -2   51.39    3.50
  12   0   2   50.09    3.30
 -12  12   2   48.90    3.70
  12   0   2   50.29    3.70
   0 -12   2   47.90    3.20
   0 -12   2   47.00    5.10
   0 -12   2   51.19    4.00
 -12  12   2   49.20    2.80
 -12  12   2   50.69    2.90
   1  11  -2   49.80    3.20
 -12   1  -2   43.50    3.20
  11 -12  -2   46.60    2.80
  11 -12  -2   45.10    3.10
  11 -12  -2   48.50    3.60
 -12   1  -2   38.30    3.40
 -11  12   2   51.99    2.70
 -11  12   2   47.30    3.40
  -1 -11   2   37.90    2.90
  12  -1   2   42.60    3.10
 -11  12   2   41.60    3.70
 -11  12   2   46.20    2.60
  -1 -11   2   38.30    3.80
  12  -1   2   48.00    3.80
 -12   2  -2   14.40    2.10
  10 -12  -2   15.70    1.90
 -12   2  -2   12.70    2.00
 -12   2  -2   14.70    1.90
  10 -12  -2   12.30    1.80
  10 -12  -2   13.90    2.00
   2  10  -2   12.30    1.80
 -10  12   2   14.70    2.00
  -2 -10   2   10.50    2.40
 -10  12   2   14.60    1.60
  -2 -10   2   12.40    1.80
  -2 -10   2   14.10    1.90
 -10  12   2   12.20    1.70
  12  -2   2   12.50    3.20
  12  -2   2   13.80    2.20
 -10  12   2   16.10    2.00
 -12   3  -2   84.69    4.50
   9 -12  -2   80.09    3.90
   9 -12  -2   81.69    3.90
 -12   3  -2   74.19    3.90
   3   9  -2   83.79    4.10
 -12   3  -2   88.59    4.60
   9 -12  -2   87.09    4.50
  12  -3   2   81.49    4.40
  -9  12   2   77.69    3.60
  12  -3   2   82.29    4.30
  -9  12   2   71.39    3.90
  -3  -9   2   80.59    4.10
  -3  -9   2   73.09    4.50
  -3  -9   2   78.69    4.10
  -9  12   2   80.59    4.00
   8 -12  -2   81.49    4.30
   8 -12  -2   72.49    3.70
   4   8  -2   83.09    4.10
 -12   4  -2   71.39    3.70
 -12   4  -2   79.69    4.20
 -12   4  -2   78.69    4.10
   8 -12  -2   77.19    3.70
  -8  12   2   74.99    3.40
  -4  -8   2   82.89    4.00
  12  -4   2   71.79    3.80
  -4  -8   2   71.99    4.00
  -8  12   2   73.69    3.80
  -4  -8   2   75.79    5.40
  -8  12   2   82.29    3.90
  12  -4   2   78.89    4.00
  12  -4   2   77.99    4.40
 -12   5  -2   55.39    3.20
   5   7  -2   59.09    3.40
   7 -12  -2   57.29    3.20
   7 -12  -2   62.49    3.70
   7 -12  -2   59.39    3.20
 -12   5  -2   58.59    3.50
 -12   5  -2   59.69    3.70
  -5  -7   2   59.19    3.40
  -7  12   2   58.09    3.20
  -7  12   2   53.59    2.90
  12  -5   2   63.09    4.00
  -5  -7   2   64.99    3.30
  12  -5   2   56.59    3.30
  12  -5   2   57.69    3.10
  -7  12   2   61.89    3.80
 -12   6  -2  323.67   12.00
   6 -12  -2  333.17   12.40
   6 -12  -2  340.27   12.50
   6 -12  -2  327.17   12.30
   6   6  -2  338.87   12.50
 -12   6  -2  314.67   12.60
 -12   6  -2  332.77   12.80
  -6  12   2  348.17   13.60
  12  -6   2  344.87   12.90
  12  -6   2  332.17   12.40
  -6  -6   2  365.96   14.30
  -6  12   2  315.97   12.90
  -6  12   2  344.47   12.40
  -6  -6   2  338.27   12.40
  -6  -6   2  319.87   12.50
   5 -12  -2  105.39    4.90
 -12   7  -2   95.89    4.90
 -12   7  -2  109.89    4.80
   5 -12  -2  114.59    4.80
 -12   7  -2  109.99    4.30
 -12   7  -2  104.49    6.40
   5 -12  -2  107.59    4.80
   7   5  -2  112.89    5.20
  -5  12   2  101.89    4.80
  -5  12   2  101.29    4.40
  12  -7   2   98.09    4.40
  12  -7   2  101.09    4.90
  -7  -5   2  100.59    4.90
  -7  -5   2  107.49    4.90
  -7  -5   2   94.89    4.90
  12  -7   2  107.19    5.30
  -5  12   2  100.19    6.10
   4 -12  -2  528.65   18.20
 -12   8  -2  483.95   18.40
   4 -12  -2  504.55   18.20
 -12   8  -2  510.55   18.50
   8   4  -2  517.35   18.40
 -12   8  -2  501.15   18.00
   4 -12  -2  507.45   18.20
 -12   8  -2  518.55   17.60
  12  -8   2  508.35   18.60
  -8  -4   2  514.65   18.30
  -8  -4   2  489.15   18.40
  -4  12   2  503.95   17.80
  -4  12   2  521.05   19.40
  -8  -4   2  520.45   18.20
  12  -8   2  487.55   17.80
  -4  12   2  504.95   18.20
  12  -8   2  498.05   18.20
   3 -12  -2    5.40    1.60
 -12   9  -2    5.60    1.70
 -12   9  -2    6.70    1.70
   3 -12  -2    4.00    1.60
   3 -12  -2    7.20    1.70
   9   3  -2    4.20    3.10
  12  -9   2    8.70    2.00
  12  -9   2    6.80    1.60
  -3  12   2   10.10    2.60
  -9  -3   2    5.80    1.70
  -3  12   2    5.50    1.90
  -9  -3   2    5.50    1.90
  -9  -3   2    6.90    1.80
 -12  10  -2   24.30    1.70
   2 -12  -2   17.80    2.50
  10   2  -2   20.50    2.50
   2 -12  -2   23.10    2.30
   2 -12  -2   23.10    2.30
 -10  -2   2   19.80    2.40
 -10  -2   2   16.90    2.20
 -10  -2   2   16.10    2.10
  12 -10   2   20.20    2.20
  -2  12   2   18.60    2.70
  12 -10   2   16.80    2.60
 -12  11  -2   42.00    2.10
 -12  11  -2   41.90    2.10
 -12  11  -2   41.70    3.10
   1 -12  -2   42.80    3.00
   1 -12  -2   39.30    3.20
   1 -12  -2   43.20    3.30
  11   1  -2   41.10    3.80
  -1  12   2   42.20    3.10
  12 -11   2   40.60    2.80
 -11  -1   2   39.70    3.30
 -11  -1   2   33.20    3.00
  12 -11   2   39.80    3.50
 -11  -1   2   49.90    3.50
  12   0  -2   46.90    3.80
   0 -12  -2   40.50    3.10
 -12  12  -2   42.30    3.30
 -12  12  -2   47.50    2.20
 -12  12  -2   45.00    2.20
   0 -12  -2   47.20    3.10
   0 -12  -2   43.00    3.40
   0  12   2   46.10    3.10
  12 -12   2   44.60    2.90
  12 -12   2   49.90    3.50
 -12   0   2   43.60    3.40
 -12   0   2   43.50    3.30
 -12   0   2   41.10    3.60
  -1 -12  -2    6.60    1.90
  -1 -12  -2    3.70    1.70
  -1 -12  -2    6.00    2.10
 -12  13  -2    8.40    0.90
  13  -1  -2    6.20    2.10
 -12  13  -2    7.90    1.00
 -12  13  -2    7.00    1.80
 -13   1   2    4.40    2.10
 -13   1   2    7.50    2.10
 -13   1   2    6.40    2.00
  12 -13   2    5.70    2.50
   1  12   2    6.50    1.90
  12 -13   2    5.50    1.60
 -12  14  -2  171.48    6.40
  -2 -12  -2  165.68    7.70
  -2 -12  -2  181.68    7.90
 -12  14  -2  176.28    6.50
  14  -2  -2  174.18    8.20
 -12  14  -2  176.38    7.80
  12 -14   2  188.58    7.60
   2  12   2  185.18    7.70
 -14   2   2  183.88    8.00
 -14   2   2  173.58    8.00
  12 -14   2  179.18    8.00
 -14   2   2  180.78    7.50
  15  -3  -2    5.60    2.80
  -3 -12  -2    6.20    2.50
 -12  15  -2    7.40    1.00
 -12  15  -2   12.60    4.00
  -3 -12  -2    6.10    2.50
 -12  15  -2    6.20    1.10
 -15   3   2    6.40    2.70
  12 -15   2    4.50    2.10
 -15   3   2   11.70    2.40
  12 -15   2    9.10    2.80
   3  12   2    7.30    2.50
  12 -15   2    9.30    1.30
 -15   3   2   10.40    2.60
  16  -4  -2  165.98    8.10
 -12  16  -2  159.08    5.80
  -4 -12  -2  151.18    7.30
  -4 -12  -2  172.58    7.40
  -4 -12  -2  151.78    7.10
  12 -16   2  144.29    6.90
  12 -16   2  169.08    7.90
 -16   4   2  147.09    8.40
   4  12   2  163.58    7.40
  12 -16   2  149.79    6.30
 -16   4   2  165.18    7.20
 -16   4   2  155.08    8.60
 -12  17  -2   33.20    3.80
  17  -5  -2   23.70    3.40
  -5 -12  -2   28.70    3.70
 -12  17  -2   22.40    1.90
  -5 -12  -2   32.70    3.40
  -5 -12  -2   29.90    3.30
  12 -17   2   24.70    3.50
 -17   5   2   26.80    3.50
 -17   5   2   25.60    3.70
   5  12   2   23.30    3.20
  12 -17   2   29.00    3.30
  18  -6  -2   50.79    4.70
[truncated: 3,601,217 more chars]
