# Supplementary material
Source: MDPI journal article supplement (https://www.mdpi.com/2304-6740/12/5/131)
Supplement: s1 [file s1 › GM16_22B_0m.cif]

 
data_GM16_22B_0m
 
_audit_creation_method            'SHELXL-2018/3'
_shelx_SHELXL_version_number      '2018/3'
_chemical_name_systematic         ?
_chemical_name_common             ?
_chemical_melting_point           ?
_chemical_formula_moiety          ?
_chemical_formula_sum
 'C132 H103 Ag2 F12 N4 O6 P6' 
_chemical_formula_weight          2470.75

loop_
 _atom_type_symbol
 _atom_type_description
 _atom_type_scat_dispersion_real
 _atom_type_scat_dispersion_imag
 _atom_type_scat_source
 'C'  'C'   0.0033   0.0016
 'International Tables Vol C Tables 4.2.6.8 and 6.1.1.4'
 'H'  'H'   0.0000   0.0000
 'International Tables Vol C Tables 4.2.6.8 and 6.1.1.4'
 'N'  'N'   0.0061   0.0033
 'International Tables Vol C Tables 4.2.6.8 and 6.1.1.4'
 'O'  'O'   0.0106   0.0060
 'International Tables Vol C Tables 4.2.6.8 and 6.1.1.4'
 'F'  'F'   0.0171   0.0103
 'International Tables Vol C Tables 4.2.6.8 and 6.1.1.4'
 'P'  'P'   0.1023   0.0942
 'International Tables Vol C Tables 4.2.6.8 and 6.1.1.4'
 'Ag'  'Ag'  -0.8971   1.1015
 'International Tables Vol C Tables 4.2.6.8 and 6.1.1.4'
 
_space_group_crystal_system       triclinic
_space_group_IT_number            2
_space_group_name_H-M_alt         'P -1'
_space_group_name_Hall            '-P 1'
 
_shelx_space_group_comment
;
The symmetry employed for this shelxl refinement is uniquely defined
by the following loop, which should always be used as a source of
symmetry information in preference to the above space-group names.
They are only intended as comments.
;
 
loop_
 _space_group_symop_operation_xyz
 'x, y, z'
 '-x, -y, -z'
 
_cell_length_a                    17.5294(8)
_cell_length_b                    18.6280(9)
_cell_length_c                    19.9345(9)
_cell_angle_alpha                 70.918(3)
_cell_angle_beta                  67.775(2)
_cell_angle_gamma                 82.362(3)
_cell_volume                      5694.3(5)
_cell_formula_units_Z             2
_cell_measurement_reflns_used           607
_cell_measurement_theta_min             2.9900
_cell_measurement_theta_max             15.8713
_cell_measurement_temperature           296(2)
 
_exptl_crystal_description        polyhedral
_exptl_crystal_colour             yellow
_exptl_crystal_density_meas       ?
_exptl_crystal_density_method     ?
_exptl_crystal_density_diffrn     1.441          
_exptl_crystal_F_000              2526
_exptl_transmission_factor_min    ?
_exptl_transmission_factor_max    ?
_exptl_crystal_size_max           0.50
_exptl_crystal_size_mid           0.32
_exptl_crystal_size_min           0.28
_exptl_absorpt_coefficient_mu     0.508
_shelx_estimated_absorpt_T_min    ?
_shelx_estimated_absorpt_T_max    ?
_exptl_absorpt_correction_type          Multi-Scan
_exptl_absorpt_process_details          
;
SADABS-2016/2 - Bruker AXS area detector scaling and absorption correction
;
_exptl_absorpt_correction_T_min   0.650
_exptl_absorpt_correction_T_max   0.746
_diffrn_ambient_temperature       296(2)
_diffrn_radiation_wavelength      0.71073
_diffrn_radiation_type            MoK\a
_diffrn_source                    'sealed tube'
_diffrn_measurement_device_type   'Bruker D8 Eco with PHOTON II detector'
_diffrn_measurement_method        '/f and /w shutterless scans'
_diffrn_detector_area_resol_mean  7.3910
_diffrn_reflns_number             230911
_diffrn_reflns_av_unetI/netI      0.0301
_diffrn_reflns_av_R_equivalents   0.0793
_diffrn_reflns_limit_h_min        -15
_diffrn_reflns_limit_h_max        15
_diffrn_reflns_limit_k_min        -22
_diffrn_reflns_limit_k_max        22
_diffrn_reflns_limit_l_min        -23
_diffrn_reflns_limit_l_max        23
_diffrn_reflns_theta_min          2.254
_diffrn_reflns_theta_max          25.000
_diffrn_reflns_theta_full         25.000
_diffrn_measured_fraction_theta_max   0.896
_diffrn_measured_fraction_theta_full  0.896
_diffrn_reflns_Laue_measured_fraction_max    0.896
_diffrn_reflns_Laue_measured_fraction_full   0.896
_diffrn_reflns_point_group_measured_fraction_max   0.896
_diffrn_reflns_point_group_measured_fraction_full  0.896
_reflns_number_total              17980
_reflns_number_gt                 13600
_reflns_threshold_expression      'I > 2\s(I)'
_reflns_Friedel_coverage          0.000
_reflns_Friedel_fraction_max      .
_reflns_Friedel_fraction_full     .
 
_reflns_special_details
;
 Reflections were merged by SHELXL according to the crystal
 class for the calculation of statistics and refinement.
 
 _reflns_Friedel_fraction is defined as the number of unique
 Friedel pairs measured divided by the number that would be
 possible theoretically, ignoring centric projections and
 systematic absences.
;
 
_computing_data_collection        ?
_computing_cell_refinement        ?
_computing_data_reduction         ?
_computing_structure_solution     'SHELXT 2014/5 (Sheldrick, 2014)'
_computing_structure_refinement 'SHELXL-2018/3 (Sheldrick, 2018)'
_computing_molecular_graphics     ?
_computing_publication_material   ?
_refine_special_details           ?
_refine_ls_structure_factor_coef  Fsqd
_refine_ls_matrix_type            full
_refine_ls_weighting_scheme       calc
_refine_ls_weighting_details
'w=1/[\s^2^(Fo^2^)+(0.0694P)^2^+8.6037P] where P=(Fo^2^+2Fc^2^)/3'
_atom_sites_solution_primary      ?
_atom_sites_solution_secondary    ?
_atom_sites_solution_hydrogens    geom
_refine_ls_hydrogen_treatment     constr
_refine_ls_extinction_method      none
_refine_ls_extinction_coef        .
_refine_ls_number_reflns          17980
_refine_ls_number_parameters      1462
_refine_ls_number_restraints      0
_refine_ls_R_factor_all           0.0787
_refine_ls_R_factor_gt            0.0535
_refine_ls_wR_factor_ref          0.1463
_refine_ls_wR_factor_gt           0.1339
_refine_ls_goodness_of_fit_ref    1.081
_refine_ls_restrained_S_all       1.081
_refine_ls_shift/su_max           0.002
_refine_ls_shift/su_mean          0.000
 
loop_
 _atom_site_label
 _atom_site_type_symbol
 _atom_site_fract_x
 _atom_site_fract_y
 _atom_site_fract_z
 _atom_site_U_iso_or_equiv
 _atom_site_adp_type
 _atom_site_occupancy
 _atom_site_site_symmetry_order  
 _atom_site_calc_flag
 _atom_site_refinement_flags_posn
 _atom_site_refinement_flags_adp
 _atom_site_refinement_flags_occupancy
 _atom_site_disorder_assembly
 _atom_site_disorder_group
Ag1 Ag 0.27324(2) 0.21852(2) 1.00967(2) 0.04099(11) Uani 1 1 d . . . . .
N1 N 0.3136(2) 0.32121(19) 0.89759(19) 0.0376(8) Uani 1 1 d . . . . .
N2 N 0.4151(2) 0.2043(2) 0.9443(2) 0.0406(8) Uani 1 1 d . . . . .
O2 O -0.2195(3) 0.4155(3) 1.0650(3) 0.1011(16) Uani 1 1 d . . . . .
O3 O 0.3370(4) -0.1781(3) 1.3681(3) 0.1151(18) Uani 1 1 d . . . . .
C1 C 0.2641(3) 0.3781(2) 0.8775(2) 0.0427(11) Uani 1 1 d . . . . .
C2 C 0.2945(3) 0.4369(3) 0.8070(3) 0.0567(13) Uani 1 1 d . . . . .
H2 H 0.259877 0.476471 0.792879 0.068 Uiso 1 1 calc R U . . .
C3 C 0.3742(3) 0.4347(3) 0.7608(3) 0.0615(14) Uani 1 1 d . . . . .
H3 H 0.393927 0.472503 0.714610 0.074 Uiso 1 1 calc R U . . .
C4 C 0.4273(3) 0.3757(3) 0.7821(3) 0.0548(13) Uani 1 1 d . . . . .
C5 C 0.5126(4) 0.3730(4) 0.7382(3) 0.0722(17) Uani 1 1 d . . . . .
H5 H 0.533884 0.409325 0.691074 0.087 Uiso 1 1 calc R U . . .
C6 C 0.5624(4) 0.3203(4) 0.7627(3) 0.0733(17) Uani 1 1 d . . . . .
H6 H 0.618330 0.321593 0.733587 0.088 Uiso 1 1 calc R U . . .
C7 C 0.5318(3) 0.2613(3) 0.8330(3) 0.0551(13) Uani 1 1 d . . . . .
C8 C 0.4473(3) 0.2596(3) 0.8772(2) 0.0412(10) Uani 1 1 d . . . . .
C9 C 0.3939(3) 0.3199(3) 0.8522(2) 0.0431(11) Uani 1 1 d . . . . .
C10 C 0.5825(3) 0.2051(4) 0.8619(3) 0.0675(16) Uani 1 1 d . . . . .
H10 H 0.638821 0.204844 0.834703 0.081 Uiso 1 1 calc R U . . .
C11 C 0.5497(3) 0.1513(3) 0.9292(3) 0.0662(15) Uani 1 1 d . . . . .
H11 H 0.583471 0.114061 0.948280 0.079 Uiso 1 1 calc R U . . .
C12 C 0.4648(3) 0.1517(3) 0.9704(3) 0.0485(12) Uani 1 1 d . . . . .
C13 C 0.4266(3) 0.0961(3) 1.0440(3) 0.0507(12) Uani 1 1 d . . . . .
H13 H 0.369422 0.098330 1.065503 0.061 Uiso 1 1 calc R U . . .
C14 C 0.4642(3) 0.0429(3) 1.0836(3) 0.0634(14) Uani 1 1 d . . . . .
H14 H 0.521359 0.040872 1.061562 0.076 Uiso 1 1 calc R U . . .
C15 C 0.4274(4) -0.0130(3) 1.1573(3) 0.0614(14) Uani 1 1 d . . . . .
C16 C 0.4789(4) -0.0590(4) 1.1941(4) 0.089(2) Uani 1 1 d . . . . .
H16 H 0.535693 -0.052987 1.171364 0.107 Uiso 1 1 calc R U . . .
C17 C 0.4460(5) -0.1133(4) 1.2638(5) 0.097(2) Uani 1 1 d . . . . .
H17 H 0.481270 -0.143307 1.287001 0.117 Uiso 1 1 calc R U . . .
C18 C 0.3632(5) -0.1238(4) 1.2992(4) 0.0817(19) Uani 1 1 d . . . . .
C19 C 0.3115(4) -0.0798(3) 1.2635(4) 0.0749(17) Uani 1 1 d . . . . .
H19 H 0.254748 -0.086515 1.286433 0.090 Uiso 1 1 calc R U . . .
C20 C 0.3438(4) -0.0261(3) 1.1944(3) 0.0692(16) Uani 1 1 d . . . . .
H20 H 0.307841 0.002821 1.171354 0.083 Uiso 1 1 calc R U . . .
C21 C 0.2531(6) -0.1933(5) 1.4063(5) 0.125(3) Uani 1 1 d . . . . .
H21A H 0.244677 -0.229885 1.455290 0.188 Uiso 1 1 calc R U . . .
H21B H 0.233103 -0.213230 1.377355 0.188 Uiso 1 1 calc R U . . .
H21C H 0.223701 -0.147245 1.412666 0.188 Uiso 1 1 calc R U . . .
C22 C 0.1792(3) 0.3776(2) 0.9281(3) 0.0441(11) Uani 1 1 d . . . . .
H22 H 0.164535 0.340372 0.975124 0.053 Uiso 1 1 calc R U . . .
C23 C 0.1212(3) 0.4251(3) 0.9133(3) 0.0495(12) Uani 1 1 d . . . . .
H23 H 0.138451 0.465503 0.868829 0.059 Uiso 1 1 calc R U . . .
C24 C 0.0332(3) 0.4226(2) 0.9576(3) 0.0452(11) Uani 1 1 d . . . . .
C25 C -0.0006(3) 0.3811(3) 1.0332(3) 0.0521(12) Uani 1 1 d . . . . .
H25 H 0.034051 0.354769 1.058894 0.063 Uiso 1 1 calc R U . . .
C26 C -0.0844(3) 0.3779(3) 1.0713(3) 0.0578(13) Uani 1 1 d . . . . .
H26 H -0.106275 0.349898 1.122305 0.069 Uiso 1 1 calc R U . . .
C27 C -0.1356(3) 0.4167(3) 1.0327(3) 0.0647(15) Uani 1 1 d . . . . .
C28 C -0.1037(4) 0.4591(4) 0.9586(3) 0.0749(18) Uani 1 1 d . . . . .
H28 H -0.138578 0.485173 0.933030 0.090 Uiso 1 1 calc R U . . .
C29 C -0.0203(3) 0.4632(3) 0.9220(3) 0.0632(15) Uani 1 1 d . . . . .
H29 H 0.001173 0.494004 0.871914 0.076 Uiso 1 1 calc R U . . .
C30 C -0.2550(5) 0.3688(6) 1.1352(5) 0.142(4) Uani 1 1 d . . . . .
H30A H -0.222575 0.337877 1.161242 0.170 Uiso 1 1 calc R U . . .
H30B H -0.312153 0.367339 1.158042 0.170 Uiso 1 1 calc R U . . .
P1 P 0.29011(8) 0.28479(7) 1.09757(7) 0.0451(3) Uani 1 1 d . . . . .
P2 P 0.15611(7) 0.13760(6) 1.05666(6) 0.0372(3) Uani 1 1 d . . . . .
O1 O 0.11310(19) 0.24380(16) 1.14413(16) 0.0434(7) Uani 1 1 d . . . . .
C31 C 0.4811(6) 0.4672(6) 0.9312(4) 0.112(3) Uani 1 1 d . . . . .
H31 H 0.520343 0.503722 0.897296 0.134 Uiso 1 1 calc R U . . .
C32 C 0.5057(4) 0.3949(6) 0.9585(4) 0.100(2) Uani 1 1 d . . . . .
H32 H 0.561303 0.381593 0.942301 0.119 Uiso 1 1 calc R U . . .
C33 C 0.4472(4) 0.3408(4) 1.0111(4) 0.0744(17) Uani 1 1 d . . . . .
H33 H 0.463761 0.291105 1.029739 0.089 Uiso 1 1 calc R U . . .
C34 C 0.3644(3) 0.3604(3) 1.0357(3) 0.0545(13) Uani 1 1 d . . . . .
C35 C 0.3419(4) 0.4341(4) 1.0044(4) 0.0803(18) Uani 1 1 d . . . . .
H35 H 0.286566 0.448321 1.018634 0.096 Uiso 1 1 calc R U . . .
C36 C 0.4009(5) 0.4866(5) 0.9524(4) 0.110(3) Uani 1 1 d . . . . .
H36 H 0.385047 0.536056 0.931769 0.132 Uiso 1 1 calc R U . . .
C37 C 0.3752(5) 0.1611(6) 1.2974(4) 0.106(3) Uani 1 1 d . . . . .
H37 H 0.388957 0.136373 1.340067 0.127 Uiso 1 1 calc R U . . .
C38 C 0.4002(5) 0.2345(5) 1.2566(5) 0.105(3) Uani 1 1 d . . . . .
H38 H 0.432981 0.258493 1.270078 0.125 Uiso 1 1 calc R U . . .
C39 C 0.3762(4) 0.2727(4) 1.1948(4) 0.0825(19) Uani 1 1 d . . . . .
H39 H 0.391643 0.322860 1.167812 0.099 Uiso 1 1 calc R U . . .
C40 C 0.3296(3) 0.2363(3) 1.1737(3) 0.0549(13) Uani 1 1 d . . . . .
C41 C 0.3081(4) 0.1619(4) 1.2138(3) 0.0730(16) Uani 1 1 d . . . . .
H41 H 0.278075 0.136376 1.198987 0.088 Uiso 1 1 calc R U . . .
C42 C 0.3310(5) 0.1243(4) 1.2766(4) 0.095(2) Uani 1 1 d . . . . .
H42 H 0.315742 0.074135 1.303850 0.113 Uiso 1 1 calc R U . . .
C43 C 0.1993(3) 0.3311(2) 1.1501(2) 0.0429(11) Uani 1 1 d . . . . .
C44 C 0.1211(3) 0.3038(2) 1.1691(2) 0.0414(11) Uani 1 1 d . . . . .
C45 C 0.0504(3) 0.3345(3) 1.2115(3) 0.0519(12) Uani 1 1 d . . . . .
H45 H -0.001116 0.316280 1.222272 0.062 Uiso 1 1 calc R U . . .
C46 C 0.0574(4) 0.3925(3) 1.2375(3) 0.0585(14) Uani 1 1 d . . . . .
H46 H 0.010427 0.412670 1.267169 0.070 Uiso 1 1 calc R U . . .
C47 C 0.1334(4) 0.4206(3) 1.2198(3) 0.0621(15) Uani 1 1 d . . . . .
H47 H 0.137573 0.460127 1.237028 0.074 Uiso 1 1 calc R U . . .
C48 C 0.2039(3) 0.3905(3) 1.1765(3) 0.0561(13) Uani 1 1 d . . . . .
H48 H 0.254994 0.410093 1.164790 0.067 Uiso 1 1 calc R U . . .
C49 C 0.1094(3) 0.1703(2) 1.1929(2) 0.0397(10) Uani 1 1 d . . . . .
C50 C 0.1204(3) 0.1128(2) 1.1595(2) 0.0403(10) Uani 1 1 d . . . . .
C51 C 0.1146(3) 0.0377(3) 1.2067(3) 0.0516(12) Uani 1 1 d . . . . .
H51 H 0.120360 -0.001969 1.186416 0.062 Uiso 1 1 calc R U . . .
C52 C 0.1005(3) 0.0218(3) 1.2829(3) 0.0619(14) Uani 1 1 d . . . . .
H52 H 0.096622 -0.028406 1.313652 0.074 Uiso 1 1 calc R U . . .
C53 C 0.0921(4) 0.0798(3) 1.3138(3) 0.0638(15) Uani 1 1 d . . . . .
H53 H 0.084762 0.068697 1.364798 0.077 Uiso 1 1 calc R U . . .
C54 C 0.0945(3) 0.1545(3) 1.2691(2) 0.0511(12) Uani 1 1 d . . . . .
H54 H 0.086184 0.193782 1.290408 0.061 Uiso 1 1 calc R U . . .
C55 C 0.1681(3) 0.0451(2) 1.0390(2) 0.0438(11) Uani 1 1 d . . . . .
C56 C 0.2359(3) 0.0006(3) 1.0435(3) 0.0583(14) Uani 1 1 d . . . . .
H56 H 0.276038 0.018160 1.054107 0.070 Uiso 1 1 calc R U . . .
C57 C 0.2455(4) -0.0704(3) 1.0325(4) 0.0696(16) Uani 1 1 d . . . . .
H57 H 0.289649 -0.101608 1.039460 0.083 Uiso 1 1 calc R U . . .
C58 C 0.1904(4) -0.0943(3) 1.0114(3) 0.0680(16) Uani 1 1 d . . . . .
H58 H 0.197420 -0.141338 1.002731 0.082 Uiso 1 1 calc R U . . .
C59 C 0.1249(4) -0.0491(3) 1.0030(4) 0.0732(17) Uani 1 1 d . . . . .
H59 H 0.087903 -0.064996 0.987586 0.088 Uiso 1 1 calc R U . . .
C60 C 0.1126(3) 0.0201(3) 1.0172(3) 0.0588(14) Uani 1 1 d . . . . .
H60 H 0.067064 0.050038 1.012143 0.071 Uiso 1 1 calc R U . . .
C61 C 0.0686(3) 0.1791(2) 1.0290(3) 0.0465(11) Uani 1 1 d . . . . .
C62 C -0.0118(3) 0.1707(3) 1.0811(3) 0.0611(14) Uani 1 1 d . . . . .
H62 H -0.022113 0.144835 1.132133 0.073 Uiso 1 1 calc R U . . .
C63 C -0.0767(4) 0.2012(4) 1.0562(5) 0.083(2) Uani 1 1 d . . . . .
H63 H -0.130739 0.195930 1.090538 0.100 Uiso 1 1 calc R U . . .
C64 C -0.0605(6) 0.2392(4) 0.9810(6) 0.092(2) Uani 1 1 d . . . . .
H64 H -0.103999 0.259816 0.964513 0.111 Uiso 1 1 calc R U . . .
C65 C 0.0176(6) 0.2472(3) 0.9298(4) 0.083(2) Uani 1 1 d . . . . .
H65 H 0.027355 0.272413 0.878692 0.100 Uiso 1 1 calc R U . . .
C66 C 0.0829(4) 0.2180(3) 0.9539(3) 0.0602(14) Uani 1 1 d . . . . .
H66 H 0.136669 0.224662 0.919045 0.072 Uiso 1 1 calc R U . . .
Ag2 Ag 0.75024(2) 0.77409(2) 0.47892(2) 0.04263(11) Uani 1 1 d . . . . .
N3 N 0.7097(2) 0.6607(2) 0.57804(19) 0.0454(9) Uani 1 1 d . . . . .
N4 N 0.6075(2) 0.7821(2) 0.5412(2) 0.0458(9) Uani 1 1 d . . . . .
O5 O 0.6893(3) 1.1930(3) 0.1456(3) 0.1140(18) Uani 1 1 d . . . . .
O6 O 1.2473(3) 0.6258(3) 0.4068(2) 0.0824(12) Uani 1 1 d . . . . .
C67 C 0.7611(3) 0.6031(3) 0.5956(3) 0.0520(12) Uani 1 1 d . . . . .
C68 C 0.7296(4) 0.5381(3) 0.6585(3) 0.0711(16) Uani 1 1 d . . . . .
H68 H 0.765101 0.498654 0.671069 0.085 Uiso 1 1 calc R U . . .
C69 C 0.6478(4) 0.5332(3) 0.7005(3) 0.0771(18) Uani 1 1 d . . . . .
H69 H 0.627463 0.490627 0.741983 0.093 Uiso 1 1 calc R U . . .
C70 C 0.5943(4) 0.5918(3) 0.6816(3) 0.0666(16) Uani 1 1 d . . . . .
C71 C 0.5069(4) 0.5889(4) 0.7213(3) 0.087(2) Uani 1 1 d . . . . .
H71 H 0.484459 0.546428 0.762338 0.105 Uiso 1 1 calc R U . . .
C72 C 0.4570(4) 0.6451(4) 0.7012(3) 0.083(2) Uani 1 1 d . . . . .
H72 H 0.400510 0.640980 0.727822 0.100 Uiso 1 1 calc R U . . .
C73 C 0.4889(3) 0.7113(3) 0.6398(3) 0.0635(15) Uani 1 1 d . . . . .
C74 C 0.5743(3) 0.7184(3) 0.5991(3) 0.0512(12) Uani 1 1 d . . . . .
C75 C 0.6281(3) 0.6562(3) 0.6193(3) 0.0512(12) Uani 1 1 d . . . . .
C76 C 0.4387(4) 0.7736(4) 0.6180(4) 0.0773(18) Uani 1 1 d . . . . .
H76 H 0.382034 0.771707 0.644019 0.093 Uiso 1 1 calc R U . . .
C77 C 0.4722(3) 0.8355(4) 0.5598(3) 0.0693(15) Uani 1 1 d . . . . .
H77 H 0.438806 0.876297 0.545722 0.083 Uiso 1 1 calc R U . . .
C78 C 0.5580(3) 0.8383(3) 0.5202(3) 0.0552(13) Uani 1 1 d . . . . .
C79 C 0.5957(3) 0.9029(3) 0.4540(3) 0.0523(12) Uani 1 1 d . . . . .
H79 H 0.650831 0.912167 0.442244 0.063 Uiso 1 1 calc R U . . .
C80 C 0.5587(4) 0.9493(3) 0.4092(3) 0.0666(15) Uani 1 1 d . . . . .
H80 H 0.503178 0.939727 0.422997 0.080 Uiso 1 1 calc R U . . .
C81 C 0.5922(4) 1.0128(3) 0.3418(3) 0.0646(15) Uani 1 1 d . . . . .
C82 C 0.5509(4) 1.0413(4) 0.2911(4) 0.091(2) Uani 1 1 d . . . . .
H82 H 0.501398 1.019584 0.301342 0.110 Uiso 1 1 calc R U . . .
C83 C 0.5819(5) 1.1021(5) 0.2248(4) 0.100(2) Uani 1 1 d . . . . .
H83 H 0.552913 1.120441 0.191917 0.120 Uiso 1 1 calc R U . . .
C84 C 0.6542(5) 1.1338(4) 0.2089(4) 0.0829(19) Uani 1 1 d . . . . .
C85 C 0.6946(4) 1.1069(3) 0.2583(4) 0.0744(17) Uani 1 1 d . . . . .
H85 H 0.743671 1.129611 0.247784 0.089 Uiso 1 1 calc R U . . .
C86 C 0.6658(4) 1.0476(3) 0.3231(3) 0.0628(14) Uani 1 1 d . . . . .
H86 H 0.695936 1.030399 0.355183 0.075 Uiso 1 1 calc R U . . .
C87 C 0.6455(7) 1.2271(6) 0.0948(5) 0.153(4) Uani 1 1 d . . . . .
H87A H 0.677014 1.268266 0.053905 0.229 Uiso 1 1 calc R U . . .
H87B H 0.593133 1.245971 0.121873 0.229 Uiso 1 1 calc R U . . .
H87C H 0.637080 1.189756 0.074653 0.229 Uiso 1 1 calc R U . . .
C88 C 0.8467(3) 0.6109(3) 0.5489(3) 0.0511(12) Uani 1 1 d . . . . .
H88 H 0.859891 0.646777 0.501178 0.061 Uiso 1 1 calc R U . . .
C89 C 0.9091(4) 0.5725(3) 0.5667(3) 0.0559(13) Uani 1 1 d . . . . .
H89 H 0.895068 0.533437 0.612470 0.067 Uiso 1 1 calc R U . . .
C90 C 0.9962(3) 0.5836(3) 0.5239(3) 0.0517(12) Uani 1 1 d . . . . .
C91 C 1.0291(4) 0.6282(3) 0.4486(3) 0.0646(15) Uani 1 1 d . . . . .
H91 H 0.993364 0.651161 0.422864 0.078 Uiso 1 1 calc R U . . .
C92 C 1.1120(4) 0.6397(3) 0.4108(3) 0.0666(15) Uani 1 1 d . . . . .
H92 H 1.131738 0.668886 0.360037 0.080 Uiso 1 1 calc R U . . .
C93 C 1.1661(4) 0.6080(3) 0.4479(3) 0.0623(14) Uani 1 1 d . . . . .
C94 C 1.1362(4) 0.5614(3) 0.5215(3) 0.0709(16) Uani 1 1 d . . . . .
H94 H 1.172392 0.538016 0.546444 0.085 Uiso 1 1 calc R U . . .
C95 C 1.0535(4) 0.5494(3) 0.5580(3) 0.0650(15) Uani 1 1 d . . . . .
H95 H 1.034701 0.517082 0.607609 0.078 Uiso 1 1 calc R U . . .
C96 C 1.3043(4) 0.5984(5) 0.4446(4) 0.107(3) Uani 1 1 d . . . . .
H96A H 1.357518 0.619776 0.411872 0.161 Uiso 1 1 calc R U . . .
H96B H 1.308004 0.544071 0.457231 0.161 Uiso 1 1 calc R U . . .
H96C H 1.286099 0.612958 0.490254 0.161 Uiso 1 1 calc R U . . .
O4 O 0.8075(2) 0.89398(18) 0.30670(17) 0.0528(8) Uani 1 1 d . . . . .
P3 P 0.85599(7) 0.86397(6) 0.43879(6) 0.0362(3) Uani 1 1 d . . . . .
P4 P 0.73788(8) 0.73303(6) 0.37325(7) 0.0428(3) Uani 1 1 d . . . . .
C97 C 0.7660(5) 1.1078(4) 0.4345(5) 0.093(2) Uani 1 1 d . . . . .
H97 H 0.746395 1.156580 0.435138 0.111 Uiso 1 1 calc R U . . .
C98 C 0.7324(4) 1.0474(4) 0.4961(5) 0.087(2) Uani 1 1 d . . . . .
H98 H 0.691291 1.055205 0.539209 0.105 Uiso 1 1 calc R U . . .
C99 C 0.7591(3) 0.9745(3) 0.4947(3) 0.0621(14) Uani 1 1 d . . . . .
H99 H 0.733548 0.933322 0.535932 0.075 Uiso 1 1 calc R U . . .
C100 C 0.8228(3) 0.9624(3) 0.4332(3) 0.0479(11) Uani 1 1 d . . . . .
C101 C 0.8582(4) 1.0245(3) 0.3695(3) 0.0610(14) Uani 1 1 d . . . . .
H101 H 0.900569 1.017056 0.326896 0.073 Uiso 1 1 calc R U . . .
C102 C 0.8289(4) 1.0975(3) 0.3712(4) 0.0800(19) Uani 1 1 d . . . . .
H102 H 0.851950 1.139244 0.329575 0.096 Uiso 1 1 calc R U . . .
C103 C 1.0494(4) 0.8177(4) 0.5523(3) 0.0733(17) Uani 1 1 d . . . . .
H103 H 1.090215 0.806801 0.573403 0.088 Uiso 1 1 calc R U . . .
C104 C 0.9973(4) 0.7622(3) 0.5659(3) 0.0691(16) Uani 1 1 d . . . . .
H104 H 1.003444 0.713057 0.595377 0.083 Uiso 1 1 calc R U . . .
C105 C 0.9354(4) 0.7786(3) 0.5362(3) 0.0575(14) Uani 1 1 d . . . . .
H105 H 0.897447 0.741416 0.549261 0.069 Uiso 1 1 calc R U . . .
C106 C 0.9290(3) 0.8490(3) 0.4875(3) 0.0475(11) Uani 1 1 d . . . . .
C107 C 0.9815(3) 0.9063(3) 0.4750(3) 0.0549(13) Uani 1 1 d . . . . .
H107 H 0.975991 0.955272 0.444866 0.066 Uiso 1 1 calc R U . . .
C108 C 1.0413(4) 0.8902(3) 0.5070(3) 0.0671(15) Uani 1 1 d . . . . .
H108 H 1.076415 0.928345 0.498157 0.081 Uiso 1 1 calc R U . . .
C109 C 1.0552(4) 0.8337(3) 0.2562(3) 0.0694(16) Uani 1 1 d . . . . .
H109 H 1.110229 0.819040 0.245587 0.083 Uiso 1 1 calc R U . . .
C110 C 1.0081(3) 0.8429(3) 0.3270(3) 0.0565(13) Uani 1 1 d . . . . .
H110 H 1.031506 0.834385 0.363697 0.068 Uiso 1 1 calc R U . . .
C111 C 0.9230(3) 0.8655(2) 0.3429(2) 0.0471(12) Uani 1 1 d . . . . .
C112 C 0.8913(3) 0.8748(3) 0.2877(3) 0.0493(12) Uani 1 1 d . . . . .
C113 C 0.9372(3) 0.8668(3) 0.2171(3) 0.0570(13) Uani 1 1 d . . . . .
H113 H 0.913452 0.874845 0.180638 0.068 Uiso 1 1 calc R U . . .
C114 C 1.0202(4) 0.8465(3) 0.2015(3) 0.0725(17) Uani 1 1 d . . . . .
H114 H 1.052304 0.841430 0.153987 0.087 Uiso 1 1 calc R U . . .
C115 C 0.7165(4) 0.9194(4) 0.1616(3) 0.0678(16) Uani 1 1 d . . . . .
H115 H 0.708834 0.958085 0.121145 0.081 Uiso 1 1 calc R U . . .
C116 C 0.7562(4) 0.9348(3) 0.2044(3) 0.0671(16) Uani 1 1 d . . . . .
H116 H 0.776938 0.982830 0.191524 0.080 Uiso 1 1 calc R U . . .
C117 C 0.7640(3) 0.8777(3) 0.2656(3) 0.0551(13) Uani 1 1 d . . . . .
C118 C 0.7313(3) 0.8059(3) 0.2879(3) 0.0483(11) Uani 1 1 d . . . . .
C119 C 0.6968(3) 0.7917(3) 0.2412(3) 0.0596(13) Uani 1 1 d . . . . .
H119 H 0.678524 0.743153 0.252034 0.072 Uiso 1 1 calc R U . . .
C120 C 0.6892(4) 0.8487(4) 0.1788(3) 0.0692(16) Uani 1 1 d . . . . .
H120 H 0.665236 0.838382 0.148538 0.083 Uiso 1 1 calc R U . . .
C121 C 0.4873(5) 0.6171(5) 0.5014(4) 0.093(2) Uani 1 1 d . . . . .
H121 H 0.436084 0.594705 0.530746 0.112 Uiso 1 1 calc R U . . .
C122 C 0.4920(4) 0.6903(4) 0.4564(4) 0.088(2) Uani 1 1 d . . . . .
H122 H 0.443962 0.717517 0.454711 0.106 Uiso 1 1 calc R U . . .
C123 C 0.5672(4) 0.7244(3) 0.4132(3) 0.0684(15) Uani 1 1 d . . . . .
H123 H 0.569575 0.774646 0.382920 0.082 Uiso 1 1 calc R U . . .
C124 C 0.6397(3) 0.6845(3) 0.4144(3) 0.0520(12) Uani 1 1 d . . . . .
C125 C 0.6339(4) 0.6099(3) 0.4601(3) 0.0690(16) Uani 1 1 d . . . . .
H125 H 0.681673 0.582139 0.461644 0.083 Uiso 1 1 calc R U . . .
C126 C 0.5579(5) 0.5759(4) 0.5037(4) 0.090(2) Uani 1 1 d . . . . .
H126 H 0.554739 0.525720 0.534311 0.108 Uiso 1 1 calc R U . . .
C127 C 0.9513(4) 0.5900(3) 0.2599(3) 0.0683(16) Uani 1 1 d . . . . .
H127 H 0.996037 0.564513 0.233817 0.082 Uiso 1 1 calc R U . . .
C128 C 0.9640(4) 0.6436(3) 0.2858(3) 0.0630(14) Uani 1 1 d . . . . .
H128 H 1.017323 0.654038 0.278983 0.076 Uiso 1 1 calc R U . . .
C129 C 0.8980(3) 0.6833(3) 0.3226(3) 0.0499(12) Uani 1 1 d . . . . .
H129 H 0.907516 0.719820 0.341035 0.060 Uiso 1 1 calc R U . . .
C130 C 0.8180(3) 0.6699(2) 0.3327(2) 0.0461(12) Uani 1 1 d . . . . .
C131 C 0.8052(4) 0.6133(3) 0.3067(3) 0.0651(15) Uani 1 1 d . . . . .
H131 H 0.752259 0.602584 0.312663 0.078 Uiso 1 1 calc R U . . .
C132 C 0.8732(5) 0.5725(3) 0.2714(3) 0.0762(18) Uani 1 1 d . . . . .
H132 H 0.865065 0.533297 0.255633 0.091 Uiso 1 1 calc R U . . .
P5 P 0.76913(11) 0.34199(11) 0.84044(10) 0.0779(5) Uani 1 1 d . . . . .
F1 F 0.8298(3) 0.3996(3) 0.7679(3) 0.1433(19) Uani 1 1 d . . . . .
F2 F 0.7073(4) 0.2843(4) 0.9079(3) 0.184(3) Uani 1 1 d . . . . .
F3 F 0.8409(4) 0.2990(6) 0.8576(5) 0.256(5) Uani 1 1 d . . . . .
F4 F 0.7555(7) 0.3907(7) 0.8872(6) 0.311(7) Uani 1 1 d . . . . .
F5 F 0.6971(4) 0.3768(5) 0.8181(4) 0.219(4) Uani 1 1 d . . . . .
F6 F 0.7786(5) 0.2900(5) 0.7913(4) 0.214(4) Uani 1 1 d . . . . .
P6 P 0.21590(11) 0.65109(9) 0.66534(9) 0.0671(4) Uani 1 1 d . . . . .
F7 F 0.2716(4) 0.7011(3) 0.5859(3) 0.162(2) Uani 1 1 d . . . . .
F8 F 0.1618(3) 0.5983(2) 0.7450(2) 0.1177(15) Uani 1 1 d . . . . .
F9 F 0.2856(5) 0.6350(8) 0.6906(5) 0.299(7) Uani 1 1 d . . . . .
F10 F 0.1966(9) 0.7155(3) 0.6970(4) 0.301(7) Uani 1 1 d . . . . .
F11 F 0.1484(4) 0.6657(7) 0.6393(5) 0.291(6) Uani 1 1 d . . . . .
F12 F 0.2478(5) 0.5830(4) 0.6378(4) 0.216(4) Uani 1 1 d . . . . .
 
loop_
 _atom_site_aniso_label
 _atom_site_aniso_U_11
 _atom_site_aniso_U_22
 _atom_site_aniso_U_33
 _atom_site_aniso_U_23
 _atom_site_aniso_U_13
 _atom_site_aniso_U_12
Ag1 0.0353(2) 0.04581(19) 0.03668(18) -0.00992(14) -0.00870(14) -0.00266(14)
N1 0.036(2) 0.0393(19) 0.0369(18) -0.0113(15) -0.0106(16) -0.0052(16)
N2 0.034(2) 0.048(2) 0.043(2) -0.0212(17) -0.0117(16) 0.0006(17)
O2 0.057(3) 0.145(5) 0.091(3) -0.038(3) -0.018(3) 0.015(3)
O3 0.129(5) 0.105(4) 0.086(4) 0.000(3) -0.038(3) 0.005(3)
C1 0.049(3) 0.037(2) 0.045(2) -0.0092(19) -0.021(2) -0.005(2)
C2 0.058(4) 0.048(3) 0.057(3) 0.000(2) -0.025(3) -0.010(2)
C3 0.063(4) 0.056(3) 0.052(3) 0.002(2) -0.015(3) -0.021(3)
C4 0.050(3) 0.058(3) 0.047(3) -0.008(2) -0.008(2) -0.017(2)
C5 0.052(4) 0.082(4) 0.057(3) -0.007(3) 0.002(3) -0.015(3)
C6 0.041(3) 0.091(4) 0.067(4) -0.023(3) 0.008(3) -0.016(3)
C7 0.034(3) 0.068(3) 0.062(3) -0.029(3) -0.005(2) -0.007(2)
C8 0.031(3) 0.053(3) 0.043(2) -0.023(2) -0.0075(19) -0.008(2)
C9 0.040(3) 0.050(3) 0.043(2) -0.018(2) -0.012(2) -0.010(2)
C10 0.028(3) 0.091(4) 0.080(4) -0.040(3) -0.006(3) 0.004(3)
C11 0.035(3) 0.078(4) 0.081(4) -0.027(3) -0.018(3) 0.011(3)
C12 0.040(3) 0.056(3) 0.056(3) -0.026(2) -0.019(2) 0.008(2)
C13 0.035(3) 0.057(3) 0.062(3) -0.021(2) -0.020(2) 0.010(2)
C14 0.046(3) 0.068(3) 0.078(4) -0.025(3) -0.027(3) 0.013(3)
C15 0.062(4) 0.058(3) 0.075(4) -0.022(3) -0.041(3) 0.017(3)
C16 0.075(5) 0.089(5) 0.104(5) -0.008(4) -0.056(4) 0.013(4)
C17 0.106(7) 0.084(5) 0.110(6) -0.008(4) -0.074(5) 0.023(4)
C18 0.095(6) 0.071(4) 0.083(4) -0.014(3) -0.047(4) 0.008(4)
C19 0.070(4) 0.071(4) 0.081(4) -0.020(3) -0.028(3) 0.004(3)
C20 0.062(4) 0.067(4) 0.078(4) -0.014(3) -0.035(3) 0.011(3)
C21 0.157(9) 0.094(6) 0.096(6) -0.004(5) -0.028(6) -0.017(6)
C22 0.044(3) 0.040(2) 0.046(2) -0.0081(19) -0.018(2) 0.000(2)
C23 0.063(3) 0.039(2) 0.044(3) -0.010(2) -0.020(2) 0.004(2)
C24 0.049(3) 0.040(2) 0.049(3) -0.019(2) -0.021(2) 0.011(2)
C25 0.055(3) 0.051(3) 0.055(3) -0.019(2) -0.027(3) 0.010(2)
C26 0.057(4) 0.060(3) 0.051(3) -0.019(2) -0.014(3) 0.004(3)
C27 0.047(4) 0.080(4) 0.078(4) -0.041(3) -0.026(3) 0.016(3)
C28 0.056(4) 0.100(5) 0.066(4) -0.028(3) -0.029(3) 0.033(3)
C29 0.065(4) 0.067(3) 0.051(3) -0.016(3) -0.024(3) 0.025(3)
C30 0.064(5) 0.203(10) 0.104(6) 0.000(7) -0.010(5) -0.002(6)
P1 0.0412(7) 0.0581(7) 0.0452(6) -0.0262(6) -0.0176(5) 0.0032(6)
P2 0.0391(7) 0.0377(6) 0.0349(6) -0.0109(5) -0.0126(5) -0.0025(5)
O1 0.0498(19) 0.0408(16) 0.0386(16) -0.0132(13) -0.0137(14) -0.0004(14)
C31 0.095(7) 0.151(8) 0.079(5) -0.023(5) -0.009(4) -0.058(6)
C32 0.057(5) 0.159(8) 0.088(5) -0.061(6) -0.004(4) -0.024(5)
C33 0.050(4) 0.101(5) 0.085(4) -0.050(4) -0.018(3) -0.008(3)
C34 0.043(3) 0.075(4) 0.054(3) -0.030(3) -0.015(2) -0.008(2)
C35 0.067(4) 0.083(4) 0.075(4) -0.006(3) -0.019(3) -0.015(3)
C36 0.098(6) 0.106(6) 0.093(5) 0.010(4) -0.026(5) -0.028(5)
C37 0.124(7) 0.139(7) 0.071(5) -0.042(5) -0.058(5) 0.047(6)
C38 0.125(7) 0.134(7) 0.103(6) -0.065(5) -0.078(5) 0.030(6)
C39 0.105(5) 0.092(5) 0.080(4) -0.047(4) -0.057(4) 0.025(4)
C40 0.058(3) 0.071(3) 0.051(3) -0.033(3) -0.029(3) 0.018(3)
C41 0.072(4) 0.081(4) 0.071(4) -0.029(3) -0.029(3) 0.011(3)
C42 0.108(6) 0.098(5) 0.080(5) -0.015(4) -0.051(4) 0.017(4)
C43 0.047(3) 0.045(2) 0.039(2) -0.0175(19) -0.016(2) 0.005(2)
C44 0.048(3) 0.040(2) 0.034(2) -0.0133(18) -0.014(2) 0.006(2)
C45 0.052(3) 0.047(3) 0.046(3) -0.014(2) -0.010(2) 0.006(2)
C46 0.066(4) 0.047(3) 0.053(3) -0.020(2) -0.012(3) 0.019(3)
C47 0.087(5) 0.045(3) 0.057(3) -0.028(2) -0.022(3) 0.011(3)
C48 0.060(3) 0.053(3) 0.058(3) -0.023(2) -0.019(3) -0.002(2)
C49 0.035(3) 0.041(2) 0.036(2) -0.0084(18) -0.0078(18) -0.0025(18)
C50 0.037(3) 0.045(2) 0.035(2) -0.0098(19) -0.0086(19) -0.0058(19)
C51 0.061(3) 0.041(2) 0.043(3) -0.008(2) -0.010(2) -0.006(2)
C52 0.077(4) 0.047(3) 0.043(3) -0.001(2) -0.011(3) -0.007(3)
C53 0.084(4) 0.061(3) 0.033(2) -0.006(2) -0.012(2) -0.010(3)
C54 0.063(3) 0.049(3) 0.038(2) -0.016(2) -0.010(2) -0.005(2)
C55 0.045(3) 0.042(2) 0.043(2) -0.014(2) -0.014(2) -0.002(2)
C56 0.057(3) 0.064(3) 0.076(4) -0.037(3) -0.038(3) 0.013(3)
C57 0.066(4) 0.061(3) 0.096(4) -0.033(3) -0.044(3) 0.022(3)
C58 0.064(4) 0.051(3) 0.093(4) -0.032(3) -0.025(3) 0.006(3)
C59 0.065(4) 0.066(4) 0.110(5) -0.049(3) -0.035(4) 0.000(3)
C60 0.051(3) 0.055(3) 0.084(4) -0.032(3) -0.030(3) 0.003(2)
C61 0.052(3) 0.040(2) 0.056(3) -0.017(2) -0.026(2) 0.000(2)
C62 0.055(4) 0.057(3) 0.081(4) -0.028(3) -0.030(3) 0.007(3)
C63 0.057(4) 0.079(4) 0.145(7) -0.057(5) -0.055(4) 0.018(3)
C64 0.122(7) 0.057(4) 0.153(8) -0.040(4) -0.108(7) 0.021(4)
C65 0.128(7) 0.055(3) 0.096(5) -0.013(3) -0.079(5) -0.005(4)
C66 0.081(4) 0.051(3) 0.065(3) -0.014(2) -0.048(3) 0.004(3)
Ag2 0.0462(2) 0.03954(19) 0.03886(18) -0.00603(14) -0.01208(15) -0.01422(15)
N3 0.054(3) 0.044(2) 0.0351(19) -0.0026(16) -0.0144(18) -0.0209(19)
N4 0.045(2) 0.049(2) 0.045(2) -0.0148(18) -0.0153(18) -0.0088(18)
O5 0.123(4) 0.095(4) 0.086(3) 0.010(3) -0.033(3) 0.012(3)
O6 0.061(3) 0.108(3) 0.074(3) -0.027(2) -0.023(2) 0.012(2)
C67 0.070(4) 0.041(3) 0.049(3) -0.004(2) -0.029(3) -0.018(2)
C68 0.087(5) 0.048(3) 0.066(4) 0.008(3) -0.030(3) -0.022(3)
C69 0.098(5) 0.060(4) 0.060(3) 0.012(3) -0.028(4) -0.038(3)
C70 0.075(4) 0.072(4) 0.044(3) 0.000(3) -0.013(3) -0.038(3)
C71 0.086(5) 0.102(5) 0.056(4) 0.005(3) -0.013(3) -0.057(4)
C72 0.057(4) 0.114(6) 0.063(4) -0.016(4) -0.001(3) -0.040(4)
C73 0.047(3) 0.082(4) 0.056(3) -0.022(3) -0.004(3) -0.023(3)
C74 0.051(3) 0.064(3) 0.042(3) -0.018(2) -0.012(2) -0.022(2)
C75 0.062(4) 0.053(3) 0.041(2) -0.009(2) -0.018(2) -0.023(2)
C76 0.045(4) 0.107(5) 0.079(4) -0.039(4) -0.006(3) -0.015(3)
C77 0.050(4) 0.078(4) 0.079(4) -0.030(3) -0.018(3) -0.001(3)
C78 0.045(3) 0.067(3) 0.062(3) -0.032(3) -0.016(3) -0.009(3)
C79 0.042(3) 0.052(3) 0.065(3) -0.020(2) -0.019(2) -0.003(2)
C80 0.050(3) 0.068(4) 0.087(4) -0.025(3) -0.031(3) 0.004(3)
C81 0.056(4) 0.061(3) 0.082(4) -0.021(3) -0.035(3) 0.014(3)
C82 0.072(5) 0.096(5) 0.107(6) -0.014(4) -0.048(4) 0.005(4)
C83 0.097(6) 0.111(6) 0.090(5) -0.011(4) -0.058(5) 0.026(5)
C84 0.084(5) 0.071(4) 0.081(4) -0.014(3) -0.029(4) 0.019(4)
C85 0.071(4) 0.068(4) 0.083(4) -0.017(3) -0.031(3) 0.000(3)
C86 0.062(4) 0.058(3) 0.078(4) -0.020(3) -0.039(3) 0.006(3)
C87 0.177(10) 0.146(8) 0.086(6) 0.010(5) -0.046(6) 0.040(7)
C88 0.069(4) 0.039(2) 0.047(3) -0.003(2) -0.025(3) -0.013(2)
C89 0.085(4) 0.040(3) 0.050(3) -0.009(2) -0.037(3) -0.001(3)
C90 0.071(4) 0.038(2) 0.054(3) -0.014(2) -0.033(3) 0.006(2)
C91 0.082(5) 0.065(3) 0.055(3) -0.010(3) -0.042(3) 0.006(3)
C92 0.069(4) 0.077(4) 0.051(3) -0.015(3) -0.023(3) 0.004(3)
C93 0.065(4) 0.068(3) 0.061(3) -0.028(3) -0.027(3) 0.014(3)
C94 0.076(5) 0.074(4) 0.068(4) -0.020(3) -0.039(3) 0.021(3)
C95 0.085(5) 0.052(3) 0.056(3) -0.008(2) -0.033(3) 0.009(3)
C96 0.070(5) 0.161(8) 0.087(5) -0.037(5) -0.033(4) 0.025(5)
O4 0.059(2) 0.0556(19) 0.0446(18) -0.0188(15) -0.0160(16) -0.0028(16)
P3 0.0415(7) 0.0323(5) 0.0345(5) -0.0100(4) -0.0108(5) -0.0077(5)
P4 0.0534(8) 0.0403(6) 0.0425(6) -0.0130(5) -0.0229(6) -0.0078(5)
C97 0.098(6) 0.066(4) 0.148(7) -0.060(5) -0.065(5) 0.025(4)
C98 0.081(5) 0.072(4) 0.119(6) -0.057(4) -0.027(4) 0.013(4)
C99 0.065(4) 0.057(3) 0.068(3) -0.032(3) -0.017(3) 0.002(3)
C100 0.045(3) 0.041(2) 0.063(3) -0.022(2) -0.020(2) -0.004(2)
C101 0.070(4) 0.041(3) 0.073(4) -0.010(2) -0.031(3) -0.008(2)
C102 0.098(5) 0.044(3) 0.113(5) -0.014(3) -0.061(5) -0.004(3)
C103 0.081(4) 0.082(4) 0.078(4) -0.033(3) -0.048(3) 0.012(3)
C104 0.104(5) 0.049(3) 0.073(4) -0.010(3) -0.060(4) 0.002(3)
C105 0.082(4) 0.042(3) 0.055(3) -0.007(2) -0.034(3) -0.012(2)
C106 0.047(3) 0.045(3) 0.045(3) -0.009(2) -0.015(2) -0.006(2)
C107 0.058(3) 0.049(3) 0.062(3) -0.018(2) -0.024(3) -0.005(2)
C108 0.064(4) 0.070(4) 0.078(4) -0.023(3) -0.035(3) -0.008(3)
C109 0.052(4) 0.075(4) 0.073(4) -0.032(3) -0.004(3) -0.007(3)
C110 0.048(3) 0.053(3) 0.064(3) -0.020(2) -0.013(3) -0.004(2)
C111 0.058(3) 0.038(2) 0.042(2) -0.0116(19) -0.008(2) -0.020(2)
C112 0.044(3) 0.051(3) 0.046(3) -0.010(2) -0.009(2) -0.010(2)
C113 0.055(4) 0.073(3) 0.040(3) -0.021(2) -0.011(2) 0.001(3)
C114 0.081(5) 0.074(4) 0.049(3) -0.020(3) -0.004(3) -0.010(3)
C115 0.076(4) 0.079(4) 0.043(3) -0.013(3) -0.029(3) 0.024(3)
C116 0.103(5) 0.050(3) 0.047(3) -0.012(2) -0.029(3) 0.006(3)
C117 0.075(4) 0.054(3) 0.043(3) -0.018(2) -0.027(3) 0.003(3)
C118 0.057(3) 0.050(3) 0.040(2) -0.014(2) -0.021(2) 0.003(2)
C119 0.072(4) 0.066(3) 0.055(3) -0.020(3) -0.035(3) -0.004(3)
C120 0.074(4) 0.094(5) 0.054(3) -0.024(3) -0.039(3) 0.004(3)
C121 0.062(5) 0.117(6) 0.104(5) -0.036(5) -0.019(4) -0.037(4)
C122 0.058(4) 0.106(6) 0.117(6) -0.046(5) -0.037(4) -0.006(4)
C123 0.064(4) 0.075(4) 0.077(4) -0.030(3) -0.030(3) -0.007(3)
C124 0.057(4) 0.053(3) 0.055(3) -0.017(2) -0.025(2) -0.014(2)
C125 0.062(4) 0.068(4) 0.082(4) -0.015(3) -0.033(3) -0.018(3)
C126 0.088(6) 0.075(4) 0.105(5) -0.008(4) -0.035(4) -0.035(4)
C127 0.087(5) 0.057(3) 0.057(3) -0.019(3) -0.027(3) 0.018(3)
C128 0.063(4) 0.059(3) 0.060(3) -0.011(3) -0.023(3) 0.006(3)
C129 0.059(4) 0.046(3) 0.047(3) -0.012(2) -0.023(2) -0.004(2)
C130 0.067(4) 0.037(2) 0.041(2) -0.0104(19) -0.027(2) -0.005(2)
C131 0.083(4) 0.058(3) 0.070(4) -0.027(3) -0.036(3) -0.005(3)
C132 0.116(6) 0.051(3) 0.071(4) -0.034(3) -0.034(4) 0.009(3)
P5 0.0611(11) 0.0910(12) 0.0775(11) -0.0192(9) -0.0288(9) 0.0092(9)
F1 0.105(4) 0.132(4) 0.147(4) -0.015(3) -0.013(3) -0.015(3)
F2 0.186(6) 0.198(6) 0.095(4) 0.018(4) -0.007(4) -0.055(5)
F3 0.147(6) 0.341(11) 0.221(8) 0.022(8) -0.109(6) 0.045(7)
F4 0.299(11) 0.375(13) 0.296(11) -0.267(11) 0.035(9) -0.133(10)
F5 0.107(4) 0.250(8) 0.216(7) 0.041(6) -0.070(5) 0.026(5)
F6 0.216(8) 0.209(7) 0.177(6) -0.103(6) 0.023(6) -0.043(6)
P6 0.0716(11) 0.0587(9) 0.0672(9) -0.0059(7) -0.0307(8) -0.0042(7)
F7 0.216(6) 0.110(4) 0.094(3) 0.006(3) -0.003(4) -0.030(4)
F8 0.129(4) 0.098(3) 0.090(3) -0.009(2) -0.007(3) -0.030(3)
F9 0.178(7) 0.522(19) 0.181(7) 0.012(10) -0.100(6) -0.151(10)
F10 0.579(18) 0.062(3) 0.134(5) -0.031(3) 0.026(8) -0.050(6)
F11 0.131(6) 0.490(16) 0.206(8) 0.007(9) -0.116(6) 0.027(8)
F12 0.272(9) 0.121(5) 0.143(5) -0.025(4) 0.033(6) 0.004(5)
 
_geom_special_details
;
 All esds (except the esd in the dihedral angle between two l.s. planes)
 are estimated using the full covariance matrix.  The cell esds are taken
 into account individually in the estimation of esds in distances, angles
 and torsion angles; correlations between esds in cell parameters are only
 used when they are defined by crystal symmetry.  An approximate (isotropic)
 treatment of cell esds is used for estimating esds involving l.s. planes.
;
 
loop_
 _geom_bond_atom_site_label_1
 _geom_bond_atom_site_label_2
 _geom_bond_distance
 _geom_bond_site_symmetry_2
 _geom_bond_publ_flag
Ag1 N1 2.350(3) . ?
Ag1 N2 2.356(4) . ?
Ag1 P2 2.4104(12) . ?
Ag1 P1 2.5661(12) . ?
N1 C1 1.333(5) . ?
N1 C9 1.357(6) . ?
N2 C12 1.332(6) . ?
N2 C8 1.360(5) . ?
O2 C30 1.340(9) . ?
O2 C27 1.364(7) . ?
O3 C18 1.363(8) . ?
O3 C21 1.396(10) . ?
C1 C2 1.428(6) . ?
C1 C22 1.447(6) . ?
C2 C3 1.355(7) . ?
C3 C4 1.406(7) . ?
C4 C9 1.403(6) . ?
C4 C5 1.423(7) . ?
C5 C6 1.321(8) . ?
C6 C7 1.429(8) . ?
C7 C10 1.400(8) . ?
C7 C8 1.407(6) . ?
C8 C9 1.448(6) . ?
C10 C11 1.351(8) . ?
C11 C12 1.401(7) . ?
C12 C13 1.456(7) . ?
C13 C14 1.323(7) . ?
C14 C15 1.457(8) . ?
C15 C20 1.382(8) . ?
C15 C16 1.404(8) . ?
C16 C17 1.384(10) . ?
C17 C18 1.361(10) . ?
C18 C19 1.381(9) . ?
C19 C20 1.371(8) . ?
C22 C23 1.312(6) . ?
C23 C24 1.457(7) . ?
C24 C25 1.379(6) . ?
C24 C29 1.386(7) . ?
C25 C26 1.373(7) . ?
C26 C27 1.380(7) . ?
C27 C28 1.359(8) . ?
C28 C29 1.365(8) . ?
P1 C40 1.824(5) . ?
P1 C34 1.826(5) . ?
P1 C43 1.827(4) . ?
P2 C50 1.816(4) . ?
P2 C61 1.817(5) . ?
P2 C55 1.839(4) . ?
O1 C49 1.388(5) . ?
O1 C44 1.405(5) . ?
C31 C36 1.342(11) . ?
C31 C32 1.356(11) . ?
C32 C33 1.392(9) . ?
C33 C34 1.385(8) . ?
C34 C35 1.383(8) . ?
C35 C36 1.377(9) . ?
C37 C42 1.346(11) . ?
C37 C38 1.374(11) . ?
C38 C39 1.392(9) . ?
C39 C40 1.379(8) . ?
C40 C41 1.374(8) . ?
C41 C42 1.396(8) . ?
C43 C48 1.394(6) . ?
C43 C44 1.395(7) . ?
C44 C45 1.383(6) . ?
C45 C46 1.379(7) . ?
C46 C47 1.371(8) . ?
C47 C48 1.382(7) . ?
C49 C54 1.375(6) . ?
C49 C50 1.394(6) . ?
C50 C51 1.400(6) . ?
C51 C52 1.377(7) . ?
C52 C53 1.375(7) . ?
C53 C54 1.381(7) . ?
C55 C56 1.370(7) . ?
C55 C60 1.387(7) . ?
C56 C57 1.389(7) . ?
C57 C58 1.362(8) . ?
C58 C59 1.360(8) . ?
C59 C60 1.381(7) . ?
C61 C66 1.372(7) . ?
C61 C62 1.391(7) . ?
C62 C63 1.390(8) . ?
C63 C64 1.367(10) . ?
C64 C65 1.355(10) . ?
C65 C66 1.384(8) . ?
Ag2 N3 2.340(3) . ?
Ag2 N4 2.344(4) . ?
Ag2 P3 2.3890(11) . ?
Ag2 P4 2.5520(12) . ?
N3 C67 1.349(6) . ?
N3 C75 1.351(6) . ?
N4 C78 1.332(6) . ?
N4 C74 1.363(6) . ?
O5 C84 1.367(8) . ?
O5 C87 1.434(9) . ?
O6 C93 1.368(7) . ?
O6 C96 1.417(8) . ?
C67 C68 1.417(7) . ?
C67 C88 1.433(7) . ?
C68 C69 1.357(8) . ?
C69 C70 1.393(9) . ?
C70 C75 1.411(7) . ?
C70 C71 1.432(9) . ?
C71 C72 1.331(9) . ?
C72 C73 1.418(8) . ?
C73 C74 1.408(7) . ?
C73 C76 1.413(9) . ?
C74 C75 1.444(7) . ?
C76 C77 1.346(8) . ?
C77 C78 1.408(7) . ?
C78 C79 1.463(7) . ?
C79 C80 1.323(7) . ?
C80 C81 1.450(8) . ?
C81 C82 1.388(8) . ?
C81 C86 1.389(8) . ?
C82 C83 1.401(10) . ?
C83 C84 1.352(10) . ?
C84 C85 1.355(9) . ?
C85 C86 1.365(8) . ?
C88 C89 1.324(7) . ?
C89 C90 1.444(8) . ?
C90 C91 1.391(7) . ?
C90 C95 1.393(7) . ?
C91 C92 1.369(8) . ?
C92 C93 1.375(8) . ?
C93 C94 1.373(8) . ?
C94 C95 1.365(8) . ?
O4 C112 1.400(6) . ?
O4 C117 1.428(6) . ?
P3 C111 1.820(5) . ?
P3 C106 1.825(5) . ?
P3 C100 1.828(4) . ?
P4 C124 1.820(5) . ?
P4 C130 1.825(5) . ?
P4 C118 1.830(5) . ?
C97 C98 1.358(10) . ?
C97 C102 1.376(10) . ?
C98 C99 1.382(8) . ?
C99 C100 1.372(7) . ?
C100 C101 1.403(7) . ?
C101 C102 1.395(8) . ?
C103 C104 1.363(8) . ?
C103 C108 1.381(8) . ?
C104 C105 1.378(7) . ?
C105 C106 1.372(6) . ?
C106 C107 1.400(7) . ?
C107 C108 1.377(7) . ?
C109 C114 1.385(8) . ?
C109 C110 1.393(7) . ?
C110 C111 1.436(7) . ?
C111 C112 1.363(7) . ?
C112 C113 1.379(6) . ?
C113 C114 1.393(8) . ?
C115 C120 1.353(8) . ?
C115 C116 1.397(8) . ?
C116 C117 1.370(7) . ?
C117 C118 1.392(7) . ?
C118 C119 1.390(7) . ?
C119 C120 1.385(7) . ?
C121 C122 1.358(10) . ?
C121 C126 1.375(10) . ?
C122 C123 1.374(9) . ?
C123 C124 1.389(8) . ?
C124 C125 1.382(7) . ?
C125 C126 1.384(8) . ?
C127 C128 1.340(8) . ?
C127 C132 1.365(9) . ?
C128 C129 1.382(7) . ?
C129 C130 1.385(7) . ?
C130 C131 1.393(6) . ?
C131 C132 1.402(8) . ?
P5 F4 1.441(7) . ?
P5 F3 1.491(6) . ?
P5 F5 1.494(6) . ?
P5 F6 1.543(7) . ?
P5 F2 1.549(5) . ?
P5 F1 1.581(5) . ?
P6 F11 1.424(6) . ?
P6 F9 1.450(8) . ?
P6 F10 1.476(6) . ?
P6 F12 1.501(6) . ?
P6 F7 1.561(5) . ?
P6 F8 1.572(4) . ?
 
loop_
 _geom_angle_atom_site_label_1
 _geom_angle_atom_site_label_2
 _geom_angle_atom_site_label_3
 _geom_angle
 _geom_angle_site_symmetry_1
 _geom_angle_site_symmetry_3
 _geom_angle_publ_flag
N1 Ag1 N2 72.10(12) . . ?
N1 Ag1 P2 127.15(9) . . ?
N2 Ag1 P2 133.36(9) . . ?
N1 Ag1 P1 97.05(9) . . ?
N2 Ag1 P1 96.20(9) . . ?
P2 Ag1 P1 118.64(4) . . ?
C1 N1 C9 120.1(4) . . ?
C1 N1 Ag1 124.9(3) . . ?
C9 N1 Ag1 115.0(3) . . ?
C12 N2 C8 119.6(4) . . ?
C12 N2 Ag1 125.6(3) . . ?
C8 N2 Ag1 114.6(3) . . ?
C30 O2 C27 118.9(6) . . ?
C18 O3 C21 119.8(6) . . ?
N1 C1 C2 120.3(4) . . ?
N1 C1 C22 118.2(4) . . ?
C2 C1 C22 121.5(4) . . ?
C3 C2 C1 119.5(5) . . ?
C2 C3 C4 120.7(5) . . ?
C9 C4 C3 117.1(5) . . ?
C9 C4 C5 119.8(5) . . ?
C3 C4 C5 123.0(5) . . ?
C6 C5 C4 121.6(5) . . ?
C5 C6 C7 121.2(5) . . ?
C10 C7 C8 117.4(5) . . ?
C10 C7 C6 123.2(5) . . ?
C8 C7 C6 119.4(5) . . ?
N2 C8 C7 121.6(4) . . ?
N2 C8 C9 119.2(4) . . ?
C7 C8 C9 119.2(4) . . ?
N1 C9 C4 122.3(4) . . ?
N1 C9 C8 119.0(4) . . ?
C4 C9 C8 118.7(4) . . ?
C11 C10 C7 120.2(5) . . ?
C10 C11 C12 120.0(5) . . ?
N2 C12 C11 121.2(5) . . ?
N2 C12 C13 116.5(4) . . ?
C11 C12 C13 122.3(5) . . ?
C14 C13 C12 127.1(5) . . ?
C13 C14 C15 128.1(5) . . ?
C20 C15 C16 116.1(6) . . ?
C20 C15 C14 124.7(5) . . ?
C16 C15 C14 119.2(6) . . ?
C17 C16 C15 120.7(7) . . ?
C18 C17 C16 121.6(6) . . ?
C17 C18 O3 117.0(6) . . ?
C17 C18 C19 118.7(6) . . ?
O3 C18 C19 124.4(7) . . ?
C20 C19 C18 120.0(6) . . ?
C19 C20 C15 123.0(5) . . ?
C23 C22 C1 125.5(4) . . ?
C22 C23 C24 128.2(4) . . ?
C25 C24 C29 117.6(5) . . ?
C25 C24 C23 123.9(4) . . ?
C29 C24 C23 118.5(4) . . ?
C26 C25 C24 121.5(5) . . ?
C25 C26 C27 119.0(5) . . ?
C28 C27 O2 115.9(5) . . ?
C28 C27 C26 120.6(5) . . ?
O2 C27 C26 123.5(6) . . ?
C27 C28 C29 119.7(5) . . ?
C28 C29 C24 121.5(5) . . ?
C40 P1 C34 103.6(3) . . ?
C40 P1 C43 99.4(2) . . ?
C34 P1 C43 105.7(2) . . ?
C40 P1 Ag1 122.99(17) . . ?
C34 P1 Ag1 105.65(16) . . ?
C43 P1 Ag1 117.71(16) . . ?
C50 P2 C61 106.8(2) . . ?
C50 P2 C55 103.6(2) . . ?
C61 P2 C55 102.2(2) . . ?
C50 P2 Ag1 105.75(15) . . ?
C61 P2 Ag1 116.56(15) . . ?
C55 P2 Ag1 120.62(16) . . ?
C49 O1 C44 118.1(3) . . ?
C36 C31 C32 120.9(8) . . ?
C31 C32 C33 119.5(7) . . ?
C34 C33 C32 120.5(7) . . ?
C35 C34 C33 117.9(5) . . ?
C35 C34 P1 123.4(4) . . ?
C33 C34 P1 118.1(5) . . ?
C36 C35 C34 120.5(7) . . ?
C31 C36 C35 120.6(8) . . ?
C42 C37 C38 121.1(7) . . ?
C37 C38 C39 119.4(7) . . ?
C40 C39 C38 120.2(7) . . ?
C41 C40 C39 119.1(5) . . ?
C41 C40 P1 118.4(4) . . ?
C39 C40 P1 122.4(5) . . ?
C40 C41 C42 120.5(6) . . ?
C37 C42 C41 119.7(7) . . ?
C48 C43 C44 117.3(4) . . ?
C48 C43 P1 123.2(4) . . ?
C44 C43 P1 119.4(3) . . ?
C45 C44 C43 121.9(4) . . ?
C45 C44 O1 118.4(4) . . ?
C43 C44 O1 119.6(4) . . ?
C46 C45 C44 119.1(5) . . ?
C47 C46 C45 120.3(5) . . ?
C46 C47 C48 120.4(5) . . ?
C47 C48 C43 120.9(5) . . ?
C54 C49 O1 123.0(4) . . ?
C54 C49 C50 121.7(4) . . ?
O1 C49 C50 115.3(4) . . ?
C49 C50 C51 117.5(4) . . ?
C49 C50 P2 118.9(3) . . ?
C51 C50 P2 122.9(3) . . ?
C52 C51 C50 120.8(5) . . ?
C53 C52 C51 120.3(5) . . ?
C52 C53 C54 120.1(5) . . ?
C49 C54 C53 119.5(4) . . ?
C56 C55 C60 118.2(4) . . ?
C56 C55 P2 119.6(4) . . ?
C60 C55 P2 122.0(4) . . ?
C55 C56 C57 120.9(5) . . ?
C58 C57 C56 120.1(5) . . ?
C59 C58 C57 119.6(5) . . ?
C58 C59 C60 120.9(5) . . ?
C59 C60 C55 120.2(5) . . ?
C66 C61 C62 119.6(5) . . ?
C66 C61 P2 118.4(4) . . ?
C62 C61 P2 122.0(4) . . ?
C63 C62 C61 119.5(6) . . ?
C64 C63 C62 119.5(7) . . ?
C65 C64 C63 121.3(6) . . ?
C64 C65 C66 119.8(7) . . ?
C61 C66 C65 120.2(6) . . ?
N3 Ag2 N4 72.60(14) . . ?
N3 Ag2 P3 133.91(10) . . ?
N4 Ag2 P3 130.44(9) . . ?
N3 Ag2 P4 98.63(9) . . ?
N4 Ag2 P4 94.42(9) . . ?
P3 Ag2 P4 115.22(4) . . ?
C67 N3 C75 120.5(4) . . ?
C67 N3 Ag2 125.0(3) . . ?
C75 N3 Ag2 114.6(3) . . ?
C78 N4 C74 119.5(4) . . ?
C78 N4 Ag2 126.0(3) . . ?
C74 N4 Ag2 114.1(3) . . ?
C84 O5 C87 118.9(7) . . ?
C93 O6 C96 117.6(5) . . ?
N3 C67 C68 119.9(5) . . ?
N3 C67 C88 117.7(4) . . ?
C68 C67 C88 122.4(5) . . ?
C69 C68 C67 120.1(6) . . ?
C68 C69 C70 120.3(5) . . ?
C69 C70 C75 118.0(5) . . ?
C69 C70 C71 123.1(5) . . ?
C75 C70 C71 118.9(6) . . ?
C72 C71 C70 121.8(6) . . ?
C71 C72 C73 120.9(6) . . ?
C74 C73 C76 116.9(5) . . ?
C74 C73 C72 120.2(6) . . ?
C76 C73 C72 122.9(6) . . ?
N4 C74 C73 121.9(5) . . ?
N4 C74 C75 119.2(4) . . ?
C73 C74 C75 118.9(5) . . ?
N3 C75 C70 121.3(5) . . ?
N3 C75 C74 119.4(4) . . ?
C70 C75 C74 119.3(5) . . ?
C77 C76 C73 120.6(5) . . ?
C76 C77 C78 119.8(6) . . ?
N4 C78 C77 121.3(5) . . ?
N4 C78 C79 117.6(4) . . ?
C77 C78 C79 121.1(5) . . ?
C80 C79 C78 126.0(5) . . ?
C79 C80 C81 129.2(5) . . ?
C82 C81 C86 116.4(6) . . ?
C82 C81 C80 120.1(6) . . ?
C86 C81 C80 123.5(5) . . ?
C81 C82 C83 121.8(7) . . ?
C84 C83 C82 119.7(6) . . ?
C83 C84 C85 119.0(7) . . ?
C83 C84 O5 123.9(7) . . ?
C85 C84 O5 117.1(7) . . ?
C84 C85 C86 122.4(6) . . ?
C85 C86 C81 120.8(5) . . ?
C89 C88 C67 126.9(5) . . ?
C88 C89 C90 128.1(5) . . ?
C91 C90 C95 115.5(5) . . ?
C91 C90 C89 124.3(5) . . ?
C95 C90 C89 120.2(5) . . ?
C92 C91 C90 122.5(5) . . ?
C91 C92 C93 120.0(5) . . ?
O6 C93 C94 125.0(5) . . ?
O6 C93 C92 115.9(5) . . ?
C94 C93 C92 119.1(6) . . ?
C95 C94 C93 120.2(5) . . ?
C94 C95 C90 122.5(5) . . ?
C112 O4 C117 118.0(4) . . ?
C111 P3 C106 102.4(2) . . ?
C111 P3 C100 105.8(2) . . ?
C106 P3 C100 102.2(2) . . ?
C111 P3 Ag2 107.05(14) . . ?
C106 P3 Ag2 120.97(15) . . ?
C100 P3 Ag2 116.65(16) . . ?
C124 P4 C130 108.0(2) . . ?
C124 P4 C118 103.6(2) . . ?
C130 P4 C118 101.8(2) . . ?
C124 P4 Ag2 105.75(16) . . ?
C130 P4 Ag2 117.48(15) . . ?
C118 P4 Ag2 119.02(15) . . ?
C98 C97 C102 120.6(6) . . ?
C97 C98 C99 120.2(6) . . ?
C100 C99 C98 120.6(6) . . ?
C99 C100 C101 119.5(5) . . ?
C99 C100 P3 117.1(4) . . ?
C101 C100 P3 123.4(4) . . ?
C102 C101 C100 119.0(6) . . ?
C97 C102 C101 120.1(6) . . ?
C104 C103 C108 119.8(5) . . ?
C103 C104 C105 120.2(5) . . ?
C106 C105 C104 121.1(5) . . ?
C105 C106 C107 118.3(5) . . ?
C105 C106 P3 119.4(4) . . ?
C107 C106 P3 122.2(4) . . ?
C108 C107 C106 120.2(5) . . ?
C107 C108 C103 120.2(5) . . ?
C114 C109 C110 120.1(6) . . ?
C109 C110 C111 119.6(5) . . ?
C112 C111 C110 117.6(4) . . ?
C112 C111 P3 120.9(4) . . ?
C110 C111 P3 120.5(4) . . ?
C111 C112 C113 123.6(5) . . ?
C111 C112 O4 115.7(4) . . ?
C113 C112 O4 120.7(5) . . ?
C112 C113 C114 118.4(5) . . ?
C109 C114 C113 120.7(5) . . ?
C120 C115 C116 120.5(5) . . ?
C117 C116 C115 118.7(5) . . ?
C116 C117 C118 122.1(5) . . ?
C116 C117 O4 117.7(5) . . ?
C118 C117 O4 120.2(4) . . ?
C119 C118 C117 117.2(4) . . ?
C119 C118 P4 122.2(4) . . ?
C117 C118 P4 120.6(4) . . ?
C120 C119 C118 121.1(5) . . ?
C115 C120 C119 120.1(5) . . ?
C122 C121 C126 120.3(6) . . ?
C121 C122 C123 120.6(7) . . ?
C122 C123 C124 120.6(6) . . ?
C125 C124 C123 118.1(5) . . ?
C125 C124 P4 119.6(4) . . ?
C123 C124 P4 121.1(4) . . ?
C124 C125 C126 121.0(6) . . ?
C121 C126 C125 119.4(6) . . ?
C128 C127 C132 120.6(6) . . ?
C127 C128 C129 120.1(6) . . ?
C128 C129 C130 121.4(5) . . ?
C129 C130 C131 118.1(5) . . ?
C129 C130 P4 116.8(3) . . ?
C131 C130 P4 124.9(4) . . ?
C130 C131 C132 119.1(6) . . ?
C127 C132 C131 120.6(5) . . ?
F4 P5 F3 97.0(7) . . ?
F4 P5 F5 91.0(6) . . ?
F3 P5 F5 171.9(6) . . ?
F4 P5 F6 176.8(6) . . ?
F3 P5 F6 85.7(5) . . ?
F5 P5 F6 86.3(5) . . ?
F4 P5 F2 89.8(5) . . ?
F3 P5 F2 92.0(4) . . ?
F5 P5 F2 86.5(4) . . ?
F6 P5 F2 88.5(4) . . ?
F4 P5 F1 93.3(5) . . ?
F3 P5 F1 90.1(4) . . ?
F5 P5 F1 91.0(3) . . ?
F6 P5 F1 88.3(4) . . ?
F2 P5 F1 176.1(4) . . ?
F11 P6 F9 178.5(8) . . ?
F11 P6 F10 94.5(7) . . ?
F9 P6 F10 86.9(7) . . ?
F11 P6 F12 95.3(7) . . ?
F9 P6 F12 83.2(7) . . ?
F10 P6 F12 170.1(7) . . ?
F11 P6 F7 89.2(4) . . ?
F9 P6 F7 90.3(4) . . ?
F10 P6 F7 92.3(3) . . ?
F12 P6 F7 87.8(3) . . ?
F11 P6 F8 91.7(4) . . ?
F9 P6 F8 88.8(4) . . ?
F10 P6 F8 89.3(3) . . ?
F12 P6 F8 90.4(3) . . ?
F7 P6 F8 178.0(3) . . ?
 
_refine_diff_density_max    1.200
_refine_diff_density_min   -0.722
_refine_diff_density_rms    0.080

# start Validation Reply Form
_vrf_PLAT029_GM16_22B_0m
;
PROBLEM: _diffrn_measured_fraction_theta_full value Low .      0.896 Why?  
RESPONSE: This is due to diffractions with low intensity at high angles.
;
_vrf_PLAT232_GM16_22B_0m
;
PROBLEM: Hirshfeld Test Diff (M-X)  Ag1      --P1       .       17.1 s.u.  
RESPONSE: The assignment of the atom types is correct. The  alert is 
probably due to the size difference between Ag ans P.
;
_vrf_PLAT910_GM16_22B_0m
;
PROBLEM: Missing # of FCF Reflection(s) Below Theta(Min).         14 Note  
RESPONSE: These reflections are affected by the beamstop.
;
# end Validation Reply Form

_shelx_res_file
;
TITL GM16_22B_0m_a.res in P-1
    GM16_22B_0m.res
    created by SHELXL-2018/3 at 13:59:34 on 29-Mar-2024
CELL 0.71073 17.5294 18.6280 19.9345 70.918 67.775 82.362
ZERR 4.00 0.0008 0.0009 0.0009 0.003 0.002 0.003
LATT 1
SFAC C H N O F P AG
UNIT 264 206 8 12 24 12 4
ACTA
LIST 6 ! automatically inserted. Change 6 to 4 for CHECKCIF!!
TEMP 23.000
OMIT 0 50
OMIT 0 0 2
OMIT 2  -1   1
OMIT 4   1   1
OMIT 1   2   1
OMIT 12 -15   6
OMIT 10 -17   3
OMIT 10 -17   4
OMIT 15 -12 4
OMIT 13 -14 6
L.S. 6
FMAP 2
PLAN -10 0 0.00
WGHT    0.069400    8.603703
FVAR       0.13982
AG1   7    0.273237    0.218523    1.009668    11.00000    0.03533    0.04581 =
         0.03668   -0.00992   -0.00870   -0.00266
REM N^N LIGAND 1
N1    3    0.313586    0.321214    0.897594    11.00000    0.03563    0.03932 =
         0.03694   -0.01127   -0.01062   -0.00525
N2    3    0.415105    0.204338    0.944251    11.00000    0.03397    0.04820 =
         0.04325   -0.02117   -0.01174    0.00062
O2    4   -0.219486    0.415525    1.064967    11.00000    0.05656    0.14463 =
         0.09122   -0.03761   -0.01816    0.01528
O3    4    0.337042   -0.178139    1.368062    11.00000    0.12920    0.10533 =
         0.08571    0.00042   -0.03809    0.00492
C1    1    0.264130    0.378140    0.877471    11.00000    0.04880    0.03747 =
         0.04460   -0.00923   -0.02081   -0.00530
C2    1    0.294504    0.436933    0.806991    11.00000    0.05824    0.04798 =
         0.05737    0.00048   -0.02465   -0.00960
AFIX  43
H2    2    0.259877    0.476471    0.792879    11.00000   -1.20000
AFIX   0
C3    1    0.374188    0.434651    0.760838    11.00000    0.06283    0.05648 =
         0.05167    0.00247   -0.01498   -0.02085
AFIX  43
H3    2    0.393927    0.472503    0.714610    11.00000   -1.20000
AFIX   0
C4    1    0.427310    0.375677    0.782104    11.00000    0.04953    0.05814 =
         0.04683   -0.00772   -0.00822   -0.01687
C5    1    0.512625    0.373035    0.738182    11.00000    0.05173    0.08184 =
         0.05659   -0.00716    0.00223   -0.01496
AFIX  43
H5    2    0.533884    0.409325    0.691074    11.00000   -1.20000
AFIX   0
C6    1    0.562404    0.320298    0.762664    11.00000    0.04068    0.09128 =
         0.06661   -0.02271    0.00775   -0.01567
AFIX  43
H6    2    0.618330    0.321593    0.733587    11.00000   -1.20000
AFIX   0
C7    1    0.531848    0.261283    0.833043    11.00000    0.03352    0.06815 =
         0.06163   -0.02899   -0.00481   -0.00703
C8    1    0.447281    0.259571    0.877179    11.00000    0.03094    0.05349 =
         0.04253   -0.02259   -0.00747   -0.00810
C9    1    0.393881    0.319934    0.852193    11.00000    0.03999    0.05019 =
         0.04278   -0.01798   -0.01220   -0.00998
C10   1    0.582480    0.205126    0.861919    11.00000    0.02838    0.09137 =
         0.08012   -0.03998   -0.00606    0.00376
AFIX  43
H10   2    0.638821    0.204844    0.834703    11.00000   -1.20000
AFIX   0
C11   1    0.549700    0.151326    0.929237    11.00000    0.03544    0.07797 =
         0.08109   -0.02658   -0.01803    0.01074
AFIX  43
H11   2    0.583471    0.114061    0.948280    11.00000   -1.20000
AFIX   0
C12   1    0.464824    0.151672    0.970367    11.00000    0.03971    0.05590 =
         0.05635   -0.02620   -0.01901    0.00758
C13   1    0.426575    0.096138    1.043969    11.00000    0.03497    0.05721 =
         0.06159   -0.02093   -0.02013    0.01030
AFIX  43
H13   2    0.369422    0.098330    1.065503    11.00000   -1.20000
AFIX   0
C14   1    0.464240    0.042889    1.083574    11.00000    0.04644    0.06833 =
         0.07827   -0.02453   -0.02746    0.01257
AFIX  43
H14   2    0.521359    0.040872    1.061562    11.00000   -1.20000
AFIX   0
C15   1    0.427389   -0.012960    1.157348    11.00000    0.06178    0.05840 =
         0.07472   -0.02161   -0.04071    0.01745
C16   1    0.478878   -0.059015    1.194089    11.00000    0.07530    0.08862 =
         0.10413   -0.00775   -0.05635    0.01340
AFIX  43
H16   2    0.535693   -0.052987    1.171364    11.00000   -1.20000
AFIX   0
C17   1    0.445971   -0.113308    1.263788    11.00000    0.10614    0.08421 =
         0.11039   -0.00784   -0.07396    0.02323
AFIX  43
H17   2    0.481270   -0.143307    1.287001    11.00000   -1.20000
AFIX   0
C18   1    0.363170   -0.123845    1.299172    11.00000    0.09507    0.07124 =
         0.08270   -0.01368   -0.04701    0.00833
C19   1    0.311462   -0.079771    1.263533    11.00000    0.06993    0.07085 =
         0.08102   -0.01971   -0.02800    0.00356
AFIX  43
H19   2    0.254748   -0.086515    1.286433    11.00000   -1.20000
AFIX   0
C20   1    0.343789   -0.026084    1.194389    11.00000    0.06232    0.06682 =
         0.07795   -0.01384   -0.03528    0.01122
AFIX  43
H20   2    0.307841    0.002821    1.171354    11.00000   -1.20000
AFIX   0
C21   1    0.253076   -0.193309    1.406331    11.00000    0.15680    0.09351 =
         0.09577   -0.00391   -0.02825   -0.01745
AFIX 137
H21A  2    0.244677   -0.229885    1.455290    11.00000   -1.50000
H21B  2    0.233103   -0.213230    1.377355    11.00000   -1.50000
H21C  2    0.223701   -0.147245    1.412666    11.00000   -1.50000
AFIX   0
C22   1    0.179222    0.377562    0.928111    11.00000    0.04445    0.03950 =
         0.04609   -0.00811   -0.01809   -0.00006
AFIX  43
H22   2    0.164535    0.340372    0.975124    11.00000   -1.20000
AFIX   0
C23   1    0.121217    0.425094    0.913280    11.00000    0.06308    0.03859 =
         0.04421   -0.01017   -0.01998    0.00424
AFIX  43
H23   2    0.138451    0.465503    0.868829    11.00000   -1.20000
AFIX   0
C24   1    0.033223    0.422580    0.957634    11.00000    0.04945    0.04047 =
         0.04900   -0.01880   -0.02051    0.01106
C25   1   -0.000616    0.381114    1.033175    11.00000    0.05513    0.05112 =
         0.05524   -0.01871   -0.02653    0.01048
AFIX  43
H25   2    0.034051    0.354769    1.058894    11.00000   -1.20000
AFIX   0
C26   1   -0.084373    0.377860    1.071271    11.00000    0.05740    0.06047 =
         0.05141   -0.01943   -0.01418    0.00377
AFIX  43
H26   2   -0.106275    0.349898    1.122305    11.00000   -1.20000
AFIX   0
C27   1   -0.135581    0.416695    1.032716    11.00000    0.04724    0.08016 =
         0.07818   -0.04127   -0.02559    0.01561
C28   1   -0.103707    0.459097    0.958625    11.00000    0.05650    0.09971 =
         0.06627   -0.02753   -0.02857    0.03305
AFIX  43
H28   2   -0.138578    0.485173    0.933030    11.00000   -1.20000
AFIX   0
C29   1   -0.020269    0.463225    0.921960    11.00000    0.06496    0.06741 =
         0.05082   -0.01607   -0.02363    0.02485
AFIX  43
H29   2    0.001173    0.494004    0.871914    11.00000   -1.20000
AFIX   0
C30   1   -0.255028    0.368819    1.135248    11.00000    0.06435    0.20310 =
         0.10372   -0.00043   -0.00989   -0.00210
AFIX  93
H30A  2   -0.222575    0.337877    1.161242    11.00000   -1.20000
H30B  2   -0.312153    0.367339    1.158042    11.00000   -1.20000
AFIX   0
REM DIPHOSPHINE LIGAND 1
P1    6    0.290107    0.284789    1.097569    11.00000    0.04115    0.05810 =
         0.04525   -0.02619   -0.01762    0.00324
P2    6    0.156107    0.137597    1.056660    11.00000    0.03911    0.03771 =
         0.03492   -0.01088   -0.01261   -0.00251
O1    4    0.113100    0.243799    1.144130    11.00000    0.04979    0.04082 =
         0.03860   -0.01319   -0.01367   -0.00038
C31   1    0.481131    0.467167    0.931185    11.00000    0.09483    0.15125 =
         0.07863   -0.02344   -0.00934   -0.05847
AFIX  43
H31   2    0.520343    0.503722    0.897296    11.00000   -1.20000
AFIX   0
C32   1    0.505732    0.394905    0.958520    11.00000    0.05703    0.15893 =
         0.08791   -0.06084   -0.00411   -0.02402
AFIX  43
H32   2    0.561303    0.381593    0.942301    11.00000   -1.20000
AFIX   0
C33   1    0.447157    0.340785    1.011056    11.00000    0.05046    0.10130 =
         0.08476   -0.04990   -0.01765   -0.00832
AFIX  43
H33   2    0.463761    0.291105    1.029739    11.00000   -1.20000
AFIX   0
C34   1    0.364381    0.360368    1.035694    11.00000    0.04313    0.07518 =
         0.05367   -0.03016   -0.01518   -0.00773
C35   1    0.341925    0.434099    1.004425    11.00000    0.06717    0.08320 =
         0.07463   -0.00550   -0.01899   -0.01499
AFIX  43
H35   2    0.286566    0.448321    1.018634    11.00000   -1.20000
AFIX   0
C36   1    0.400922    0.486639    0.952396    11.00000    0.09844    0.10612 =
         0.09294    0.01049   -0.02551   -0.02837
AFIX  43
H36   2    0.385047    0.536056    0.931769    11.00000   -1.20000
AFIX   0
C37   1    0.375165    0.161083    1.297364    11.00000    0.12423    0.13880 =
         0.07052   -0.04206   -0.05827    0.04720
AFIX  43
H37   2    0.388957    0.136373    1.340067    11.00000   -1.20000
AFIX   0
C38   1    0.400247    0.234511    1.256574    11.00000    0.12530    0.13373 =
         0.10260   -0.06488   -0.07824    0.03023
AFIX  43
H38   2    0.432981    0.258493    1.270078    11.00000   -1.20000
AFIX   0
C39   1    0.376209    0.272681    1.194842    11.00000    0.10519    0.09246 =
         0.08045   -0.04720   -0.05683    0.02463
AFIX  43
H39   2    0.391643    0.322860    1.167812    11.00000   -1.20000
AFIX   0
C40   1    0.329585    0.236296    1.173667    11.00000    0.05765    0.07074 =
         0.05118   -0.03298   -0.02923    0.01770
C41   1    0.308086    0.161888    1.213774    11.00000    0.07152    0.08075 =
         0.07109   -0.02865   -0.02931    0.01131
AFIX  43
H41   2    0.278075    0.136376    1.198987    11.00000   -1.20000
AFIX   0
C42   1    0.330964    0.124313    1.276552    11.00000    0.10769    0.09775 =
         0.08008   -0.01522   -0.05137    0.01673
AFIX  43
H42   2    0.315742    0.074135    1.303850    11.00000   -1.20000
AFIX   0
C43   1    0.199319    0.331089    1.150077    11.00000    0.04709    0.04469 =
         0.03908   -0.01755   -0.01558    0.00521
C44   1    0.121138    0.303776    1.169061    11.00000    0.04830    0.04033 =
         0.03417   -0.01330   -0.01358    0.00626
C45   1    0.050447    0.334497    1.211458    11.00000    0.05241    0.04727 =
         0.04647   -0.01396   -0.00987    0.00630
AFIX  43
H45   2   -0.001116    0.316280    1.222272    11.00000   -1.20000
AFIX   0
C46   1    0.057448    0.392498    1.237479    11.00000    0.06615    0.04671 =
         0.05279   -0.02018   -0.01244    0.01876
AFIX  43
H46   2    0.010427    0.412670    1.267169    11.00000   -1.20000
AFIX   0
C47   1    0.133419    0.420580    1.219785    11.00000    0.08661    0.04491 =
         0.05720   -0.02776   -0.02172    0.01083
AFIX  43
H47   2    0.137573    0.460127    1.237028    11.00000   -1.20000
AFIX   0
C48   1    0.203862    0.390461    1.176474    11.00000    0.05959    0.05330 =
         0.05850   -0.02321   -0.01888   -0.00157
AFIX  43
H48   2    0.254994    0.410093    1.164790    11.00000   -1.20000
AFIX   0
C49   1    0.109384    0.170347    1.192881    11.00000    0.03540    0.04088 =
         0.03634   -0.00845   -0.00784   -0.00255
C50   1    0.120373    0.112820    1.159519    11.00000    0.03657    0.04524 =
         0.03502   -0.00979   -0.00859   -0.00584
C51   1    0.114599    0.037688    1.206736    11.00000    0.06092    0.04083 =
         0.04252   -0.00763   -0.00953   -0.00636
AFIX  43
H51   2    0.120360   -0.001969    1.186416    11.00000   -1.20000
AFIX   0
C52   1    0.100489    0.021785    1.282927    11.00000    0.07692    0.04714 =
         0.04346   -0.00092   -0.01067   -0.00710
AFIX  43
H52   2    0.096622   -0.028406    1.313652    11.00000   -1.20000
AFIX   0
C53   1    0.092094    0.079788    1.313764    11.00000    0.08423    0.06121 =
         0.03313   -0.00552   -0.01153   -0.00992
AFIX  43
H53   2    0.084762    0.068697    1.364798    11.00000   -1.20000
AFIX   0
C54   1    0.094527    0.154505    1.269101    11.00000    0.06295    0.04870 =
         0.03803   -0.01561   -0.01045   -0.00496
AFIX  43
H54   2    0.086184    0.193782    1.290408    11.00000   -1.20000
AFIX   0
C55   1    0.168115    0.045107    1.039020    11.00000    0.04538    0.04247 =
         0.04307   -0.01404   -0.01388   -0.00159
C56   1    0.235920    0.000595    1.043514    11.00000    0.05659    0.06365 =
         0.07630   -0.03673   -0.03849    0.01341
AFIX  43
H56   2    0.276038    0.018160    1.054107    11.00000   -1.20000
AFIX   0
C57   1    0.245521   -0.070398    1.032459    11.00000    0.06580    0.06105 =
         0.09583   -0.03289   -0.04368    0.02226
AFIX  43
H57   2    0.289649   -0.101608    1.039460    11.00000   -1.20000
AFIX   0
C58   1    0.190367   -0.094349    1.011375    11.00000    0.06435    0.05104 =
         0.09252   -0.03244   -0.02528    0.00615
AFIX  43
H58   2    0.197420   -0.141338    1.002731    11.00000   -1.20000
AFIX   0
C59   1    0.124898   -0.049103    1.003041    11.00000    0.06545    0.06578 =
         0.10961   -0.04873   -0.03536   -0.00037
AFIX  43
H59   2    0.087903   -0.064996    0.987586    11.00000   -1.20000
AFIX   0
C60   1    0.112631    0.020115    1.017221    11.00000    0.05135    0.05479 =
         0.08385   -0.03238   -0.03016    0.00305
AFIX  43
H60   2    0.067064    0.050038    1.012143    11.00000   -1.20000
AFIX   0
C61   1    0.068582    0.179081    1.028956    11.00000    0.05163    0.04013 =
         0.05596   -0.01690   -0.02632   -0.00014
C62   1   -0.011834    0.170695    1.081053    11.00000    0.05500    0.05664 =
         0.08050   -0.02763   -0.03036    0.00671
AFIX  43
H62   2   -0.022113    0.144835    1.132133    11.00000   -1.20000
AFIX   0
C63   1   -0.076728    0.201245    1.056217    11.00000    0.05689    0.07868 =
         0.14476   -0.05727   -0.05451    0.01797
AFIX  43
H63   2   -0.130739    0.195930    1.090538    11.00000   -1.20000
AFIX   0
C64   1   -0.060521    0.239159    0.980954    11.00000    0.12188    0.05686 =
         0.15253   -0.03963   -0.10812    0.02142
AFIX  43
H64   2   -0.103999    0.259816    0.964513    11.00000   -1.20000
AFIX   0
C65   1    0.017624    0.247249    0.929818    11.00000    0.12790    0.05458 =
         0.09644   -0.01285   -0.07944   -0.00466
AFIX  43
H65   2    0.027355    0.272413    0.878692    11.00000   -1.20000
AFIX   0
C66   1    0.082925    0.217966    0.953869    11.00000    0.08052    0.05071 =
         0.06474   -0.01354   -0.04754    0.00409
AFIX  43
H66   2    0.136669    0.224662    0.919045    11.00000   -1.20000
AFIX   0
AG2   7    0.750237    0.774088    0.478925    11.00000    0.04624    0.03954 =
         0.03886   -0.00603   -0.01208   -0.01422
REM N^N LIGAND 2
N3    3    0.709713    0.660728    0.578045    11.00000    0.05442    0.04402 =
         0.03514   -0.00260   -0.01439   -0.02093
N4    3    0.607540    0.782087    0.541250    11.00000    0.04472    0.04922 =
         0.04548   -0.01476   -0.01525   -0.00880
O5    4    0.689316    1.193050    0.145625    11.00000    0.12329    0.09473 =
         0.08648    0.00959   -0.03256    0.01176
O6    4    1.247296    0.625798    0.406836    11.00000    0.06068    0.10808 =
         0.07351   -0.02696   -0.02348    0.01245
C67   1    0.761061    0.603133    0.595550    11.00000    0.07014    0.04083 =
         0.04936   -0.00370   -0.02864   -0.01774
C68   1    0.729636    0.538082    0.658494    11.00000    0.08713    0.04808 =
         0.06642    0.00849   -0.02968   -0.02166
AFIX  43
H68   2    0.765101    0.498654    0.671069    11.00000   -1.20000
AFIX   0
C69   1    0.647848    0.533236    0.700460    11.00000    0.09811    0.05983 =
         0.06045    0.01204   -0.02762   -0.03834
AFIX  43
H69   2    0.627463    0.490627    0.741983    11.00000   -1.20000
AFIX   0
C70   1    0.594293    0.591842    0.681587    11.00000    0.07459    0.07214 =
         0.04387   -0.00031   -0.01342   -0.03805
C71   1    0.506933    0.588867    0.721338    11.00000    0.08591    0.10226 =
         0.05600    0.00477   -0.01259   -0.05694
AFIX  43
H71   2    0.484459    0.546428    0.762338    11.00000   -1.20000
AFIX   0
C72   1    0.457033    0.645137    0.701238    11.00000    0.05748    0.11384 =
         0.06350   -0.01603   -0.00143   -0.04007
AFIX  43
H72   2    0.400510    0.640980    0.727822    11.00000   -1.20000
AFIX   0
C73   1    0.488905    0.711330    0.639837    11.00000    0.04713    0.08203 =
         0.05573   -0.02214   -0.00371   -0.02317
C74   1    0.574340    0.718406    0.599095    11.00000    0.05068    0.06402 =
         0.04247   -0.01826   -0.01164   -0.02162
C75   1    0.628125    0.656242    0.619286    11.00000    0.06243    0.05336 =
         0.04080   -0.00927   -0.01830   -0.02333
C76   1    0.438706    0.773563    0.617965    11.00000    0.04472    0.10654 =
         0.07903   -0.03950   -0.00592   -0.01533
AFIX  43
H76   2    0.382034    0.771707    0.644019    11.00000   -1.20000
AFIX   0
C77   1    0.472199    0.835505    0.559751    11.00000    0.05013    0.07846 =
         0.07915   -0.02961   -0.01813   -0.00054
AFIX  43
H77   2    0.438806    0.876297    0.545722    11.00000   -1.20000
AFIX   0
C78   1    0.557984    0.838313    0.520171    11.00000    0.04473    0.06726 =
         0.06219   -0.03159   -0.01550   -0.00857
C79   1    0.595728    0.902876    0.453956    11.00000    0.04198    0.05241 =
         0.06465   -0.02004   -0.01853   -0.00331
AFIX  43
H79   2    0.650831    0.912167    0.442244    11.00000   -1.20000
AFIX   0
C80   1    0.558666    0.949251    0.409214    11.00000    0.05001    0.06832 =
         0.08698   -0.02475   -0.03064    0.00364
AFIX  43
H80   2    0.503178    0.939727    0.422997    11.00000   -1.20000
AFIX   0
C81   1    0.592184    1.012806    0.341759    11.00000    0.05571    0.06101 =
         0.08203   -0.02118   -0.03493    0.01387
C82   1    0.550933    1.041345    0.291058    11.00000    0.07178    0.09557 =
         0.10713   -0.01361   -0.04844    0.00511
AFIX  43
H82   2    0.501398    1.019584    0.301342    11.00000   -1.20000
AFIX   0
C83   1    0.581931    1.102064    0.224801    11.00000    0.09662    0.11122 =
         0.09029   -0.01108   -0.05804    0.02639
AFIX  43
H83   2    0.552913    1.120441    0.191917    11.00000   -1.20000
AFIX   0
C84   1    0.654189    1.133831    0.208861    11.00000    0.08360    0.07061 =
         0.08126   -0.01372   -0.02943    0.01860
C85   1    0.694592    1.106902    0.258346    11.00000    0.07136    0.06781 =
         0.08261   -0.01722   -0.03097    0.00046
AFIX  43
H85   2    0.743671    1.129611    0.247784    11.00000   -1.20000
AFIX   0
C86   1    0.665847    1.047637    0.323146    11.00000    0.06207    0.05826 =
         0.07793   -0.02002   -0.03852    0.00648
AFIX  43
H86   2    0.695936    1.030399    0.355183    11.00000   -1.20000
AFIX   0
C87   1    0.645516    1.227072    0.094816    11.00000    0.17724    0.14587 =
         0.08578    0.00995   -0.04576    0.03972
AFIX 137
H87A  2    0.677014    1.268266    0.053905    11.00000   -1.50000
H87B  2    0.593133    1.245971    0.121873    11.00000   -1.50000
H87C  2    0.637080    1.189756    0.074653    11.00000   -1.50000
AFIX   0
C88   1    0.846717    0.610928    0.548946    11.00000    0.06880    0.03855 =
         0.04668   -0.00346   -0.02525   -0.01307
AFIX  43
H88   2    0.859891    0.646777    0.501178    11.00000   -1.20000
AFIX   0
C89   1    0.909095    0.572465    0.566729    11.00000    0.08530    0.04019 =
         0.05001   -0.00850   -0.03671   -0.00140
AFIX  43
H89   2    0.895068    0.533437    0.612470    11.00000   -1.20000
AFIX   0
C90   1    0.996219    0.583603    0.523899    11.00000    0.07133    0.03822 =
         0.05383   -0.01408   -0.03348    0.00619
C91   1    1.029070    0.628234    0.448556    11.00000    0.08197    0.06527 =
         0.05450   -0.00973   -0.04209    0.00566
AFIX  43
H91   2    0.993364    0.651161    0.422864    11.00000   -1.20000
AFIX   0
C92   1    1.111993    0.639682    0.410799    11.00000    0.06851    0.07681 =
         0.05129   -0.01511   -0.02324    0.00430
AFIX  43
H92   2    1.131738    0.668886    0.360037    11.00000   -1.20000
AFIX   0
C93   1    1.166093    0.608019    0.447899    11.00000    0.06491    0.06771 =
         0.06086   -0.02758   -0.02742    0.01393
C94   1    1.136179    0.561435    0.521455    11.00000    0.07572    0.07368 =
         0.06807   -0.02036   -0.03895    0.02076
AFIX  43
H94   2    1.172392    0.538016    0.546444    11.00000   -1.20000
AFIX   0
C95   1    1.053508    0.549373    0.558028    11.00000    0.08506    0.05167 =
         0.05603   -0.00752   -0.03331    0.00876
AFIX  43
H95   2    1.034701    0.517082    0.607609    11.00000   -1.20000
AFIX   0
C96   1    1.304330    0.598444    0.444594    11.00000    0.06954    0.16124 =
         0.08725   -0.03743   -0.03293    0.02500
AFIX 137
H96A  2    1.357518    0.619776    0.411872    11.00000   -1.50000
H96B  2    1.308004    0.544071    0.457231    11.00000   -1.50000
H96C  2    1.286099    0.612958    0.490254    11.00000   -1.50000
AFIX   0
REM DIPHOSPHINE LIGAND 2
O4    4    0.807476    0.893980    0.306701    11.00000    0.05946    0.05556 =
         0.04456   -0.01877   -0.01604   -0.00280
P3    6    0.855990    0.863973    0.438793    11.00000    0.04148    0.03231 =
         0.03451   -0.00996   -0.01082   -0.00770
P4    6    0.737881    0.733026    0.373247    11.00000    0.05340    0.04032 =
         0.04252   -0.01295   -0.02290   -0.00781
C97   1    0.766043    1.107817    0.434512    11.00000    0.09796    0.06592 =
         0.14801   -0.06048   -0.06451    0.02544
AFIX  43
H97   2    0.746395    1.156580    0.435138    11.00000   -1.20000
AFIX   0
C98   1    0.732395    1.047447    0.496050    11.00000    0.08087    0.07227 =
         0.11901   -0.05738   -0.02693    0.01326
AFIX  43
H98   2    0.691291    1.055205    0.539209    11.00000   -1.20000
AFIX   0
C99   1    0.759052    0.974528    0.494729    11.00000    0.06479    0.05679 =
         0.06835   -0.03175   -0.01738    0.00155
AFIX  43
H99   2    0.733548    0.933322    0.535932    11.00000   -1.20000
AFIX   0
C100  1    0.822792    0.962359    0.433195    11.00000    0.04493    0.04135 =
         0.06335   -0.02182   -0.01962   -0.00369
C101  1    0.858225    1.024461    0.369546    11.00000    0.06999    0.04095 =
         0.07346   -0.00985   -0.03100   -0.00840
AFIX  43
H101  2    0.900569    1.017056    0.326896    11.00000   -1.20000
AFIX   0
C102  1    0.828939    1.097500    0.371242    11.00000    0.09847    0.04352 =
         0.11270   -0.01368   -0.06079   -0.00416
AFIX  43
H102  2    0.851950    1.139244    0.329575    11.00000   -1.20000
AFIX   0
C103  1    1.049364    0.817718    0.552278    11.00000    0.08082    0.08213 =
         0.07767   -0.03271   -0.04771    0.01248
AFIX  43
H103  2    1.090215    0.806801    0.573403    11.00000   -1.20000
AFIX   0
C104  1    0.997256    0.762193    0.565907    11.00000    0.10354    0.04873 =
         0.07317   -0.00952   -0.05963    0.00209
AFIX  43
H104  2    1.003444    0.713057    0.595377    11.00000   -1.20000
AFIX   0
C105  1    0.935441    0.778620    0.536166    11.00000    0.08190    0.04200 =
         0.05520   -0.00746   -0.03384   -0.01224
AFIX  43
H105  2    0.897447    0.741416    0.549261    11.00000   -1.20000
AFIX   0
C106  1    0.929039    0.848977    0.487545    11.00000    0.04748    0.04536 =
         0.04536   -0.00853   -0.01459   -0.00607
C107  1    0.981534    0.906272    0.474954    11.00000    0.05805    0.04871 =
         0.06201   -0.01755   -0.02364   -0.00481
AFIX  43
H107  2    0.975991    0.955272    0.444866    11.00000   -1.20000
AFIX   0
C108  1    1.041338    0.890249    0.507006    11.00000    0.06438    0.07004 =
         0.07815   -0.02301   -0.03458   -0.00824
AFIX  43
H108  2    1.076415    0.928345    0.498157    11.00000   -1.20000
AFIX   0
C109  1    1.055157    0.833742    0.256167    11.00000    0.05179    0.07468 =
         0.07348   -0.03157   -0.00360   -0.00686
AFIX  43
H109  2    1.110229    0.819040    0.245587    11.00000   -1.20000
AFIX   0
C110  1    1.008050    0.842891    0.326965    11.00000    0.04812    0.05322 =
         0.06438   -0.02024   -0.01277   -0.00427
AFIX  43
H110  2    1.031506    0.834385    0.363697    11.00000   -1.20000
AFIX   0
C111  1    0.923025    0.865544    0.342853    11.00000    0.05756    0.03841 =
         0.04198   -0.01155   -0.00838   -0.01984
C112  1    0.891333    0.874793    0.287747    11.00000    0.04357    0.05125 =
         0.04564   -0.01019   -0.00858   -0.00953
C113  1    0.937250    0.866832    0.217052    11.00000    0.05501    0.07312 =
         0.03964   -0.02086   -0.01055    0.00069
AFIX  43
H113  2    0.913452    0.874845    0.180638    11.00000   -1.20000
AFIX   0
C114  1    1.020156    0.846492    0.201528    11.00000    0.08065    0.07448 =
         0.04852   -0.02007   -0.00376   -0.01047
AFIX  43
H114  2    1.052304    0.841430    0.153987    11.00000   -1.20000
AFIX   0
C115  1    0.716523    0.919428    0.161645    11.00000    0.07628    0.07930 =
         0.04294   -0.01334   -0.02851    0.02450
AFIX  43
H115  2    0.708834    0.958085    0.121145    11.00000   -1.20000
AFIX   0
C116  1    0.756216    0.934778    0.204376    11.00000    0.10271    0.05035 =
         0.04654   -0.01245   -0.02893    0.00593
AFIX  43
H116  2    0.776938    0.982830    0.191524    11.00000   -1.20000
AFIX   0
C117  1    0.764032    0.877698    0.265570    11.00000    0.07490    0.05390 =
         0.04305   -0.01813   -0.02655    0.00325
C118  1    0.731301    0.805916    0.287876    11.00000    0.05733    0.04985 =
         0.04017   -0.01373   -0.02131    0.00334
C119  1    0.696801    0.791730    0.241180    11.00000    0.07199    0.06557 =
         0.05521   -0.02045   -0.03489   -0.00360
AFIX  43
H119  2    0.678524    0.743153    0.252034    11.00000   -1.20000
AFIX   0
C120  1    0.689185    0.848720    0.178758    11.00000    0.07389    0.09422 =
         0.05392   -0.02368   -0.03874    0.00396
AFIX  43
H120  2    0.665236    0.838382    0.148538    11.00000   -1.20000
AFIX   0
C121  1    0.487303    0.617079    0.501374    11.00000    0.06194    0.11729 =
         0.10421   -0.03565   -0.01931   -0.03664
AFIX  43
H121  2    0.436084    0.594705    0.530746    11.00000   -1.20000
AFIX   0
C122  1    0.492022    0.690258    0.456351    11.00000    0.05806    0.10557 =
         0.11711   -0.04620   -0.03656   -0.00642
AFIX  43
H122  2    0.443962    0.717517    0.454711    11.00000   -1.20000
AFIX   0
C123  1    0.567220    0.724369    0.413192    11.00000    0.06448    0.07509 =
         0.07737   -0.03011   -0.03009   -0.00666
AFIX  43
H123  2    0.569575    0.774646    0.382920    11.00000   -1.20000
AFIX   0
C124  1    0.639719    0.684452    0.414368    11.00000    0.05705    0.05266 =
         0.05492   -0.01665   -0.02467   -0.01359
C125  1    0.633857    0.609915    0.460117    11.00000    0.06230    0.06807 =
         0.08240   -0.01454   -0.03333   -0.01771
AFIX  43
H125  2    0.681673    0.582139    0.461644    11.00000   -1.20000
AFIX   0
C126  1    0.557940    0.575926    0.503717    11.00000    0.08761    0.07454 =
         0.10477   -0.00815   -0.03496   -0.03519
AFIX  43
H126  2    0.554739    0.525720    0.534311    11.00000   -1.20000
AFIX   0
C127  1    0.951283    0.590015    0.259871    11.00000    0.08675    0.05730 =
         0.05704   -0.01857   -0.02666    0.01795
AFIX  43
H127  2    0.996037    0.564513    0.233817    11.00000   -1.20000
AFIX   0
C128  1    0.964012    0.643578    0.285789    11.00000    0.06258    0.05940 =
         0.05991   -0.01055   -0.02281    0.00597
AFIX  43
H128  2    1.017323    0.654038    0.278983    11.00000   -1.20000
AFIX   0
C129  1    0.897993    0.683303    0.322630    11.00000    0.05879    0.04643 =
         0.04726   -0.01192   -0.02278   -0.00410
AFIX  43
H129  2    0.907516    0.719820    0.341035    11.00000   -1.20000
AFIX   0
C130  1    0.817957    0.669866    0.332709    11.00000    0.06727    0.03697 =
         0.04128   -0.01041   -0.02676   -0.00536
C131  1    0.805202    0.613252    0.306689    11.00000    0.08289    0.05778 =
         0.07037   -0.02708   -0.03621   -0.00524
AFIX  43
H131  2    0.752259    0.602584    0.312663    11.00000   -1.20000
AFIX   0
C132  1    0.873211    0.572546    0.271368    11.00000    0.11591    0.05146 =
         0.07135   -0.03428   -0.03428    0.00905
AFIX  43
H132  2    0.865065    0.533297    0.255633    11.00000   -1.20000
AFIX   0
REM PF6 1
P5    6    0.769132    0.341986    0.840443    11.00000    0.06111    0.09100 =
         0.07747   -0.01915   -0.02880    0.00919
F1    5    0.829755    0.399621    0.767862    11.00000    0.10468    0.13213 =
         0.14663   -0.01506   -0.01285   -0.01517
F2    5    0.707308    0.284323    0.907914    11.00000    0.18617    0.19834 =
         0.09548    0.01818   -0.00714   -0.05483
F3    5    0.840943    0.298983    0.857647    11.00000    0.14750    0.34102 =
         0.22112    0.02202   -0.10891    0.04455

F4    5    0.755455    0.390714    0.887181    11.00000    0.29921    0.37512 =
         0.29597   -0.26652    0.03483   -0.13330
F5    5    0.697084    0.376762    0.818128    11.00000    0.10691    0.25006 =
         0.21570    0.04056   -0.06978    0.02647
F6    5    0.778572    0.289999    0.791253    11.00000    0.21647    0.20924 =
         0.17715   -0.10290    0.02335   -0.04321
REM PF6 2
P6    6    0.215902    0.651089    0.665343    11.00000    0.07163    0.05866 =
         0.06724   -0.00592   -0.03070   -0.00424
F7    5    0.271585    0.701059    0.585850    11.00000    0.21569    0.10979 =
         0.09355    0.00641   -0.00345   -0.02994
F8    5    0.161835    0.598337    0.744959    11.00000    0.12922    0.09848 =
         0.08957   -0.00930   -0.00719   -0.02964
F9    5    0.285556    0.634953    0.690552    11.00000    0.17773    0.52228 =
         0.18080    0.01223   -0.09985   -0.15076
F10   5    0.196621    0.715525    0.697013    11.00000    0.57919    0.06161 =
         0.13414   -0.03093    0.02583   -0.05011
F11   5    0.148448    0.665702    0.639279    11.00000    0.13097    0.49008 =
         0.20587    0.00741   -0.11624    0.02710
F12   5    0.247768    0.583030    0.637842    11.00000    0.27189    0.12144 =
         0.14312   -0.02524    0.03270    0.00382
HKLF 4 1 1 0 0 0 1 0 0 0 1


REM  GM16_22B_0m_a.res in P-1
REM wR2 = 0.1463, GooF = S = 1.081, Restrained GooF = 1.081 for all data
REM R1 = 0.0535 for 13600 Fo > 4sig(Fo) and 0.0787 for all 17980 data
REM 1462 parameters refined using 0 restraints

END

WGHT      0.0708      8.1732

REM Highest difference peak  1.200,  deepest hole -0.722,  1-sigma level  0.080
Q1    1   0.9002  0.7586  0.3490  11.00000  0.05    1.20
Q2    1   0.7026  0.7948  0.4915  11.00000  0.05    1.08
Q3    1   0.1817  0.6122  0.6342  11.00000  0.05    0.86
Q4    1   0.1442  0.7165  0.6686  11.00000  0.05    0.74
Q5    1   0.2784  0.5974  0.6790  11.00000  0.05    0.73
Q6    1   0.8384  0.3788  0.8595  11.00000  0.05    0.70
Q7    1   0.2400  0.7084  0.6976  11.00000  0.05    0.68
Q8    1   0.7425  0.3546  0.7736  11.00000  0.05    0.65
Q9    1   0.2257  0.2435  1.0207  11.00000  0.05    0.63
Q10   1   0.7222  0.4234  0.8396  11.00000  0.05    0.62
;
_shelx_res_checksum   34011

_shelx_hkl_file
;
  -3   0   0   10.10    1.30
  -3   0   0   10.90    0.90
  -3   0   0   10.00    0.80
  -3   0   0   10.80    0.70
  -3   0   0    9.80    1.60
  -3   0   0   11.30    0.90
  -3   0   0   10.30    1.40
   3   0   0   10.90    0.80
   3   0   0   12.30    0.90
   3   0   0   12.20    1.70
   3   0   0   11.60    1.10
   3   0   0   11.40    1.40
   3   0   0   10.80    0.70
  -4   0   0  637.74   14.20
  -4   0   0  645.84   14.50
  -4   0   0  634.44   14.30
  -4   0   0  646.54   14.50
  -4   0   0  640.44   15.20
  -4   0   0  642.54   16.10
  -4   0   0  642.64   15.70
   4   0   0  635.54   14.50
   4   0   0  633.84   15.70
   4   0   0  639.24   14.30
   4   0   0  637.44   15.40
   4   0   0  632.34   15.10
   4   0   0  595.34   14.10
  -5   0   0  362.56    8.90
  -5   0   0  362.16    8.50
  -5   0   0  362.36    8.60
  -5   0   0  354.46    9.30
  -5   0   0  364.86    9.60
  -5   0   0  346.27   11.10
   5   0   0  353.96    8.60
   5   0   0  362.26    9.60
   5   0   0  325.47   13.10
   5   0   0  350.06    9.90
   5   0   0  377.56    9.00
  -6   0   0  547.35   12.60
  -6   0   0  543.45   14.50
  -6   0   0  539.35   12.80
  -6   0   0  546.65   13.10
  -6   0   0  555.34   14.10
  -6   0   0  541.55   13.10
   6   0   0  541.45   14.40
   6   0   0  549.15   14.00
   6   0   0  537.55   14.70
   6   0   0  543.15   13.00
   6   0   0  551.94   12.80
  -7   0   0  536.05   13.10
  -7   0   0  532.75   14.50
  -7   0   0  521.75   14.70
  -7   0   0  539.75   13.00
  -7   0   0  527.15   12.40
  -7   0   0  531.45   12.70
  -7   0   0  533.05   15.10
   7   0   0  528.75   14.90
   7   0   0  516.35   14.40
   7   0   0  535.75   12.90
   7   0   0  529.15   12.70
   7   0   0  521.45   14.10
  -8   0   0  184.08    6.70
  -8   0   0  186.08    6.90
  -8   0   0  180.08    5.80
  -8   0   0  180.18    7.50
  -8   0   0  176.08    5.80
  -8   0   0  174.68    5.10
  -8   0   0  182.18    8.00
  -8   0   0  181.48    5.40
   8   0   0  182.88    7.80
   8   0   0  185.28    5.70
   8   0   0  173.58    5.30
   8   0   0  175.28    6.80
   8   0   0  176.78    5.60
  -9   0   0   23.30    3.10
  -9   0   0   21.20    2.80
  -9   0   0   20.50    2.90
  -9   0   0   18.30    1.70
  -9   0   0   18.50    2.00
  -9   0   0   22.30    2.30
  -9   0   0   20.20    3.30
  -9   0   0   15.60    3.40
   9   0   0   16.20    3.20
   9   0   0   19.80    2.00
   9   0   0   19.20    2.20
   9   0   0   21.30    3.10
   9   0   0   22.60    3.00
 -10   0   0   92.79    5.10
 -10   0   0   87.09    3.80
 -10   0   0   88.39    3.50
 -10   0   0   95.99    5.40
 -10   0   0   94.89    6.50
 -10   0   0   95.29    4.30
 -10   0   0   98.39    7.30
 -10   0   0   88.69    4.20
  10   0   0   86.79    3.80
  10   0   0   88.09    5.40
  10   0   0   88.19    4.00
  10   0   0   87.59    6.20
  10   0   0   97.99    6.60
  10   0   0   91.79    4.00
 -11   0   0   20.60    2.50
 -11   0   0   27.80    3.90
 -11   0   0   27.30    4.80
 -11   0   0   23.50    4.40
 -11   0   0   21.80    2.60
 -11   0   0   24.80    2.80
 -11   0   0   25.00    3.50
 -11   0   0   20.30    2.10
  11   0   0   23.50    2.60
  11   0   0   26.50    4.00
  11   0   0   22.60    2.40
  11   0   0   20.80    3.90
  11   0   0   25.90    4.00
 -12   0   0   16.80    2.00
 -12   0   0   19.10    3.50
 -12   0   0   21.80    2.50
 -12   0   0   15.60    4.80
 -12   0   0   18.50    3.80
 -12   0   0   16.60    2.60
 -12   0   0   16.60    2.60
 -12   0   0   23.90    5.60
  12   0   0   20.20    2.40
  12   0   0   24.10    3.90
  12   0   0   16.10    2.20
  12   0   0   19.80    2.50
  12   0   0   24.20    4.50
  12   0   0   21.10    3.90
 -13   0   0    1.40    4.10
 -13   0   0    7.70    2.00
 -13   0   0    4.80    3.40
 -13   0   0    8.00    4.80
 -13   0   0    7.20    3.00
 -13   0   0    6.70    2.30
 -13   0   0    5.00    2.00
  13   0   0    6.80    2.00
  13   0   0    3.40    3.10
  13   0   0    3.20    1.80
  13   0   0    5.80    3.70
  13   0   0    3.80    3.10
  13   0   0   10.60    2.40
 -14   0   0    1.50    1.80
 -14   0   0    0.00    4.40
 -14   0   0    2.90    3.00
 -14   0   0   -1.40    2.00
 -14   0   0   -1.90    2.90
 -14   0   0   -1.70    1.90
 -14   0   0    4.00    4.70
  14   0   0    1.10    5.60
  14   0   0   -1.80    2.90
  14   0   0    3.10    2.10
  14   0   0    0.40    1.70
  14   0   0   -2.50    2.90
  14   0   0   -0.70    2.70
 -15   0   0   -0.20    3.20
 -15   0   0   -0.10    3.00
 -15   0   0   -5.90    3.20
 -15   0   0   -3.10    2.10
 -15   0   0    1.10    1.60
 -15   0   0   -3.00    5.20
 -15   0   0   -3.90    3.50
 -15   0   0   -3.00    5.10
  15   0   0    0.70    2.00
  15   0   0    1.90    1.50
  15   0   0   -0.50    3.70
  15   0   0   -0.50    1.60
  15   0   0    2.10    3.40
  15   0   0    0.50    3.50
  15  -1   0   -1.10    1.60
  15  -1   0   -2.90    3.50
  15  -1   0   -0.50    3.70
  15  -1   0   -0.40    1.60
  15  -1   0   -3.30    1.50
  15  -1   0    1.70    3.30
 -15   1   0    4.40    3.60
 -15   1   0    2.80    3.10
 -15   1   0   -0.20    3.50
 -15   1   0   -1.10    1.60
 -15   1   0   -3.30    2.00
 -15   1   0   -1.00    2.00
 -15   1   0    0.10    1.10
 -15   1   0   -6.70    4.70
 -15   1   0    1.20    7.70
  14  -1   0   41.30    3.10
  14  -1   0   45.60    5.80
  14  -1   0   41.10    5.70
  14  -1   0   40.60    3.20
 -14   1   0   41.70    6.40
 -14   1   0   44.80    3.70
 -14   1   0   44.20    6.10
 -14   1   0   39.50    4.80
 -14   1   0   47.40    6.30
 -14   1   0   45.50    5.30
 -14   1   0   40.90    3.80
 -14   1   0   47.90    3.20
 -14   1   0   33.60    2.20
  13  -1   0    1.30    1.60
  13  -1   0   -0.50    1.80
  13  -1   0   -5.30    2.90
  13  -1   0    0.50    1.60
  13  -1   0   -1.70    3.00
  13  -1   0   -2.90    3.20
 -13   1   0   -0.90    1.20
 -13   1   0   -1.10    3.10
 -13   1   0    0.30    1.80
 -13   1   0   -5.20    3.80
 -13   1   0   -1.80    1.60
 -13   1   0   -0.80    2.80
 -13   1   0   -2.80    2.70
 -13   1   0    1.00    1.90
  12  -1   0  154.18    5.80
  12  -1   0  151.18    8.30
  12  -1   0  160.68    5.90
  12  -1   0  156.88    6.40
  12  -1   0  170.38    8.30
  12  -1   0  156.58    9.20
 -12   1   0  169.38    6.60
 -12   1   0  156.58    4.90
 -12   1   0  160.58    6.20
 -12   1   0  178.28    9.40
 -12   1   0  160.28    7.60
 -12   1   0  174.88   10.20
 -12   1   0  154.28    7.50
 -12   1   0  162.68    5.50
  11  -1   0    1.90    2.80
  11  -1   0   -2.10    2.90
  11  -1   0    6.10    2.90
  11  -1   0    2.80    1.60
  11  -1   0    5.90    1.70
  11  -1   0    2.90    1.70
 -11   1   0   -0.50    1.70
 -11   1   0    1.70    2.00
 -11   1   0    4.00    1.30
 -11   1   0    4.90    3.50
 -11   1   0    3.80    3.00
 -11   1   0    2.40    1.90
 -11   1   0    2.10    1.70
 -11   1   0    5.70    3.80
  10  -1   0  222.68    9.50
  10  -1   0  201.58    8.20
  10  -1   0  195.58    6.40
  10  -1   0  215.58    8.40
  10  -1   0  206.68    6.60
  10  -1   0  204.18    8.60
 -10   1   0  215.58    8.40
 -10   1   0  209.98    6.80
 -10   1   0  209.38    6.80
 -10   1   0  207.18    5.80
 -10   1   0  223.88    9.70
 -10   1   0  224.78    8.10
 -10   1   0  206.68    9.00
   9  -1   0   37.60    2.30
   9  -1   0   32.60    4.60
   9  -1   0   34.90    2.40
   9  -1   0   33.60    3.60
   9  -1   0   35.60    2.20
   9  -1   0   31.10    3.80
  -9   1   0   37.40    2.60
  -9   1   0   35.00    2.50
  -9   1   0   33.80    1.90
  -9   1   0   35.00    4.90
  -9   1   0   42.70    5.20
  -9   1   0   33.50    2.10
  -9   1   0   30.70    3.50
   8  -1   0   96.89    3.40
   8  -1   0   89.29    5.40
   8  -1   0   91.09    5.80
   8  -1   0   95.39    3.70
   8  -1   0   98.59    4.90
   8  -1   0   92.09    3.60
  -8   1   0   94.89    5.50
  -8   1   0   96.89    3.10
  -8   1   0   93.89    3.70
  -8   1   0   94.09    3.30
  -8   1   0   95.09    5.00
  -8   1   0   92.79    5.90
  -8   1   0   96.09    3.70
   7  -1   0  302.67   10.00
   7  -1   0  293.07    7.80
   7  -1   0  293.57    7.50
   7  -1   0  300.47    9.70
   7  -1   0  297.87    9.10
   7  -1   0  290.57    7.70
  -7   1   0  290.87    7.90
  -7   1   0  300.17    9.60
  -7   1   0  292.57    7.50
  -7   1   0  298.87    7.90
  -7   1   0  292.17    7.30
  -7   1   0  309.37   10.00
  -7   1   0  288.17    9.00
   6  -1   0  419.06   10.10
   6  -1   0  412.56   10.10
   6  -1   0  406.36   11.90
   6  -1   0  421.16   11.30
   6  -1   0  416.56    9.90
   6  -1   0  409.36   11.70
  -6   1   0  412.96   10.20
  -6   1   0  417.46    9.90
  -6   1   0  417.86   11.70
  -6   1   0  422.36   11.30
  -6   1   0  428.76   11.40
  -6   1   0  409.86    9.70
   5  -1   0    1.70    1.40
   5  -1   0    4.20    0.80
   5  -1   0    5.40    1.00
   5  -1   0    4.90    0.80
   5  -1   0    5.00    1.50
  -5   1   0    1.70    0.90
  -5   1   0    0.80    1.70
  -5   1   0    1.90    1.90
  -5   1   0    3.20    0.90
  -5   1   0    3.80    0.80
  -5   1   0    4.60    0.70
  -5   1   0    1.40    1.50
   4  -1   0   60.69    3.10
   4  -1   0   62.59    2.80
   4  -1   0   54.79    3.30
   4  -1   0   57.79    2.00
   4  -1   0   62.99    2.10
   4  -1   0   63.49    2.00
  -4   1   0   63.69    2.90
  -4   1   0   55.19    3.30
  -4   1   0   57.69    1.80
  -4   1   0   61.29    2.10
  -4   1   0   63.19    2.00
  -4   1   0   56.09    3.10
  -4   1   0   56.99    2.20
   3  -1   0   58.19    2.60
   3  -1   0   59.99    1.70
   3  -1   0   59.99    1.80
   3  -1   0   57.69    2.60
   3  -1   0   56.79    1.80
   3  -1   0   58.59    2.40
  -3   1   0   61.29    2.60
  -3   1   0   59.39    2.60
  -3   1   0   58.89    1.70
  -3   1   0   58.49    2.40
  -3   1   0   58.59    1.80
  -3   1   0   62.19    1.90
  -3   1   0   57.49    1.60
   2  -1   0    4.70    0.60
   2  -1   0    4.70    0.50
   2  -1   0    1.10    0.50
  -2   1   0    4.70    0.80
  -2   1   0    2.80    0.40
  -2   1   0    2.80    0.70
  -2   1   0    3.00    0.70
  -2   1   0    4.70    0.80
  -2   1   0    2.50    0.40
  -2   1   0    2.90    0.40
  -2   1   0    3.30    0.80
  -2  -1   0   65.39    2.00
  -2  -1   0   71.59    2.40
  -2  -1   0   72.59    2.10
   2   1   0   78.69    3.10
   2   1   0   55.99    2.30
   2   1   0   58.39    2.00
  -3  -1   0    8.90    0.90
  -3  -1   0    7.80    1.00
  -3  -1   0    7.10    1.10
  -3  -1   0    9.10    0.90
  -3  -1   0    6.10    1.40
  -3  -1   0    6.50    0.90
  -3  -1   0    7.30    1.30
   3   1   0    6.70    1.00
   3   1   0    7.20    1.00
   3   1   0    6.90    0.80
   3   1   0    7.00    1.20
   3   1   0    6.90    1.40
   3   1   0    7.60    1.10
   3   1   0    9.00    1.00
  -4  -1   0  700.13   15.80
  -4  -1   0  704.13   16.40
  -4  -1   0  702.33   17.20
  -4  -1   0  696.23   15.90
  -4  -1   0  702.13   16.00
  -4  -1   0  718.73   16.10
  -4  -1   0  707.33   17.70
   4   1   0  705.83   16.50
   4   1   0  712.73   15.90
   4   1   0  655.53   15.80
   4   1   0  696.53   16.80
   4   1   0  702.33   17.10
   4   1   0  697.63   16.00
   4   1   0  703.23   16.00
  -5  -1   0  288.07    8.00
  -5  -1   0  294.37    7.40
  -5  -1   0  296.07    7.50
  -5  -1   0  293.87    7.90
  -5  -1   0  271.37   10.00
  -5  -1   0  275.57   12.60
  -5  -1   0  284.07    7.50
  -5  -1   0  288.67    7.20
   5   1   0  271.77    7.40
   5   1   0  288.57    8.00
   5   1   0  286.57    8.60
   5   1   0  294.47    7.40
   5   1   0  290.37    7.40
  -6  -1   0   11.20    1.50
  -6  -1   0   13.60    2.00
  -6  -1   0   12.70    1.90
  -6  -1   0   14.20    1.50
  -6  -1   0   12.80    1.60
  -6  -1   0   13.30    2.50
  -6  -1   0   15.70    1.80
   6   1   0   13.20    2.50
   6   1   0   10.10    1.30
   6   1   0   14.60    1.70
   6   1   0   11.30    2.10
   6   1   0   14.20    1.60
   6   1   0   15.50    2.10
  -7  -1   0  689.93   18.90
  -7  -1   0  717.73   19.00
  -7  -1   0  701.63   16.90
  -7  -1   0  715.83   16.90
  -7  -1   0  693.53   16.60
  -7  -1   0  710.73   16.40
  -7  -1   0  698.03   18.30
  -7  -1   0  702.63   17.50
   7   1   0  694.43   18.50
   7   1   0  705.73   16.80
   7   1   0  701.73   16.50
   7   1   0  701.83   18.20
   7   1   0  700.43   17.70
  -8  -1   0  452.95   12.60
  -8  -1   0  451.85   11.80
  -8  -1   0  457.15   13.60
  -8  -1   0  455.25   11.30
  -8  -1   0  459.45   11.90
  -8  -1   0  448.36   12.70
  -8  -1   0  455.15   14.30
   8   1   0  459.55   12.90
   8   1   0  474.95   11.80
   8   1   0  459.35   14.00
  -9  -1   0    5.50    2.70
  -9  -1   0    4.90    1.60
  -9  -1   0    6.80    1.70
  -9  -1   0    2.80    1.50
  -9  -1   0   -1.60    1.80
  -9  -1   0    4.90    1.30
  -9  -1   0    6.30    3.20
   9   1   0    4.00    1.60
   9   1   0    4.90    1.50
   9   1   0    3.90    2.10
   9   1   0    6.40    1.70
   9   1   0    0.90    2.50
 -10  -1   0   46.00    6.30
 -10  -1   0   40.90    5.40
 -10  -1   0   41.40    2.90
 -10  -1   0   40.80    3.10
 -10  -1   0   43.00    4.00
 -10  -1   0   42.70    3.10
 -10  -1   0   44.10    2.50
 -10  -1   0   44.20    3.80
  10   1   0   47.80    3.00
  10   1   0   45.00    5.00
  10   1   0   39.70    3.90
  10   1   0   37.20    5.00
 -11  -1   0   47.20    6.30
 -11  -1   0   43.50    3.20
 -11  -1   0   52.99    7.20
 -11  -1   0   47.90    3.50
 -11  -1   0   44.60    4.50
 -11  -1   0   40.20    3.30
 -11  -1   0   43.10    4.00
  11   1   0   41.40    5.40
  11   1   0   42.30    4.60
  11   1   0   43.50    3.10
  11   1   0   43.20    4.50
  11   1   0   42.10    3.10
 -12  -1   0   32.80    4.30
 -12  -1   0   34.70    5.20
 -12  -1   0   30.40    3.80
 -12  -1   0   29.20    3.10
 -12  -1   0   32.00    3.00
 -12  -1   0   28.00    2.30
 -12  -1   0   34.00    5.50
 -12  -1   0   28.40    3.00
  12   1   0   26.40    2.80
  12   1   0   26.70    4.40
  12   1   0   28.10    2.60
  12   1   0   28.20    4.60
  12   1   0   27.50    4.00
  12   1   0   34.30    4.50
 -13  -1   0   -6.30    4.30
 -13  -1   0    3.40    4.30
 -13  -1   0   -2.00    1.80
 -13  -1   0    0.20    1.80
 -13  -1   0    0.30    2.70
 -13  -1   0   -0.60    2.50
 -13  -1   0    2.40    1.40
 -13  -1   0    0.00    1.90
  13   1   0    0.50    2.80
  13   1   0   -0.30    2.90
  13   1   0    0.90    1.60
  13   1   0   -0.40    1.50
  13   1   0   -1.20    3.20
  13   1   0    0.00    1.80
 -14  -1   0    5.80    5.00
 -14  -1   0    3.40    5.90
 -14  -1   0    3.40    3.10
 -14  -1   0    4.30    1.60
 -14  -1   0    1.50    3.10
 -14  -1   0    6.70    2.50
 -14  -1   0    3.50    2.30
 -14  -1   0    5.80    2.10
  14   1   0    3.20    2.30
  14   1   0    8.10    3.40
  14   1   0    4.00    1.80
  14   1   0    6.60    3.80
  14   1   0    6.20    2.20
 -15  -1   0   19.10    4.70
 -15  -1   0   21.80    3.50
 -15  -1   0   22.40    3.40
 -15  -1   0   21.60    6.50
 -15  -1   0   19.00    4.30
 -15  -1   0   21.50    6.30
 -15  -1   0   18.00    2.20
 -15  -1   0   17.50    2.60
  15   1   0   23.50    4.70
  15   1   0   21.10    2.90
  15   1   0   22.70    3.10
  15   1   0   13.60    3.10
  15   1   0   26.50    5.00
  15   1   0   22.20    5.10
  15  -2   0   -4.30    3.60
  15  -2   0    2.00    3.70
  15  -2   0    2.20    3.50
  15  -2   0   -0.90    1.30
 -15   2   0    0.10    4.80
 -15   2   0    4.20    3.30
 -15   2   0    3.10    3.00
 -15   2   0   -1.00    4.30
 -15   2   0   -0.20    0.80
 -15   2   0    4.90    3.20
 -15   2   0    0.80    1.50
 -15   2   0    0.30    2.00
 -15   2   0    0.60    1.90
  14  -2   0    0.60    1.80
  14  -2   0    3.90    1.60
  14  -2   0   -1.40    3.10
 -14   2   0    2.90    3.40
 -14   2   0    1.60    1.70
 -14   2   0    1.50    1.90
 -14   2   0    3.20    4.50
 -14   2   0    0.90    2.40
 -14   2   0    3.90    1.00
 -14   2   0    0.10    4.60
 -14   2   0   10.70    5.20
  13  -2   0   23.00    4.20
  13  -2   0   22.10    4.80
  13  -2   0   21.50    2.40
  13  -2   0   23.90    2.40
  13  -2   0   21.80    2.50
  13  -2   0   22.30    4.10
 -13   2   0   16.90    5.10
 -13   2   0   15.60    3.80
 -13   2   0   13.40    4.10
 -13   2   0   19.90    2.40
 -13   2   0   15.20    2.80
 -13   2   0   25.30    5.70
 -13   2   0   16.90    1.60
 -13   2   0   25.80    2.90
 -13   2   0   19.70    4.00
  12  -2   0   59.29    5.60
  12  -2   0   58.69    3.20
  12  -2   0   58.29    3.40
  12  -2   0   59.69    5.90
  12  -2   0   60.99    6.80
  12  -2   0   63.19    3.50
 -12   2   0   64.09    7.60
 -12   2   0   58.69    3.20
 -12   2   0   56.29    2.60
 -12   2   0   59.59    3.90
 -12   2   0   70.09    6.80
 -12   2   0   52.59    5.10
 -12   2   0   58.69    3.90
 -12   2   0   62.29    5.40
 -12   2   0   62.79    5.70
  11  -2   0  103.39    6.60
  11  -2   0  106.79    7.50
  11  -2   0  108.09    6.40
  11  -2   0  104.89    4.20
  11  -2   0   95.49    5.70
  11  -2   0  108.49    4.40
 -11   2   0  106.59    5.60
 -11   2   0   99.99    7.20
 -11   2   0  101.69    3.50
 -11   2   0  105.19    5.90
 -11   2   0  100.19    4.50
 -11   2   0  109.89    7.80
 -11   2   0  109.49    4.70
 -11   2   0  100.69    6.00
  10  -2   0   11.20    1.60
  10  -2   0   11.60    3.40
  10  -2   0    9.30    1.60
  10  -2   0    7.60    1.50
  10  -2   0    8.70    3.20
  10  -2   0   11.20    2.80
 -10   2   0    9.40    3.20
 -10   2   0    8.80    1.60
 -10   2   0    8.60    1.70
 -10   2   0    6.80    1.60
 -10   2   0    8.70    3.00
 -10   2   0   11.40    3.30
 -10   2   0    9.60    1.40
   9  -2   0  138.99    6.20
   9  -2   0  141.89    6.70
   9  -2   0  129.89    4.40
   9  -2   0  132.69    4.20
   9  -2   0  122.09    7.00
   9  -2   0  135.29    4.50
  -9   2   0  129.69    4.70
  -9   2   0  130.49    6.70
  -9   2   0  127.29    5.80
  -9   2   0  131.89    4.80
  -9   2   0  132.49    7.10
  -9   2   0  129.79    3.90
  -9   2   0  133.69    4.20
   8  -2   0    9.80    2.60
   8  -2   0   14.10    1.50
   8  -2   0   12.20    1.40
   8  -2   0   11.90    2.40
   8  -2   0   12.50    2.80
   8  -2   0   12.10    1.50
  -8   2   0   11.10    1.50
  -8   2   0   11.30    1.20
  -8   2   0   10.10    2.70
  -8   2   0   11.00    1.50
  -8   2   0    9.40    2.50
  -8   2   0   12.30    1.40
  -8   2   0   12.70    2.70
   7  -2   0  378.06    9.60
   7  -2   0  402.96   12.10
   7  -2   0  401.16    9.50
   7  -2   0  401.56    9.70
   7  -2   0  399.06   11.30
   7  -2   0  388.46   11.70
  -7   2   0  366.86    9.20
  -7   2   0  395.16   12.00
  -7   2   0  394.16    9.80
  -7   2   0  381.46    9.20
  -7   2   0  400.56    9.90
  -7   2   0  395.16   11.70
  -7   2   0  393.36   11.30
  -7   2   0  402.06    9.50
   6  -2   0   28.10    3.10
   6  -2   0   25.60    1.40
   6  -2   0   22.00    1.50
   6  -2   0   23.80    2.50
   6  -2   0   24.70    1.50
   6  -2   0   21.90    2.90
  -6   2   0   22.40    2.80
  -6   2   0   23.50    1.20
  -6   2   0   23.80    1.50
  -6   2   0   27.10    3.20
  -6   2   0   27.70    1.70
  -6   2   0   26.00    2.80
  -6   2   0   25.90    1.60
   5  -2   0  172.48    6.10
   5  -2   0  178.88    4.60
   5  -2   0  186.08    6.70
   5  -2   0  177.58    4.60
   5  -2   0  178.48    4.70
  -5   2   0  177.18    4.70
  -5   2   0  170.18    4.40
  -5   2   0  173.58    4.50
  -5   2   0  178.58    4.80
  -5   2   0  180.68    5.90
  -5   2   0  178.98    6.40
  -5   2   0  174.88    6.20
   4  -2   0  855.11   18.80
   4  -2   0  837.92   20.40
   4  -2   0  840.12   18.80
   4  -2   0  866.71   18.90
   4  -2   0  842.22   20.40
   4  -2   0  844.32   19.90
  -4   2   0  867.21   20.10
  -4   2   0  819.62   18.80
  -4   2   0  891.01   20.00
  -4   2   0  844.42   18.90
  -4   2   0  858.51   18.90
  -4   2   0  846.72   20.40
  -4   2   0  858.31   18.80
  -4   2   0  874.81   20.50
   3  -2   0 1434.96   30.60
   3  -2   0 1408.16   31.10
   3  -2   0 1399.96   29.80
  -3   2   0 1264.47   32.30
  -3   2   0 1347.67   29.80
   2  -2   0 2579.04   58.09
  -2   2   0 2557.14   58.09
  -1   2   0  674.83   14.90
  -1  -2   0  185.88    5.40
  -1  -2   0  246.78    6.20
  -2  -2   0   81.29    2.60
  -2  -2   0   74.69    2.90
  -2  -2   0   80.49    2.50
  -2  -2   0   78.29    2.30
  -2  -2   0   81.19    2.50
  -2  -2   0   77.09    3.30
  -2  -2   0   79.59    2.50
  -2  -2   0   81.69    2.40
   2   2   0   77.19    3.30
   2   2   0   76.49    2.40
   2   2   0   77.69    2.30
   2   2   0   74.89    2.50
   2   2   0   78.19    2.50
   2   2   0   81.99    2.40
   2   2   0   77.39    3.00
   2   2   0   80.39    2.60
  -3  -2   0    0.10    0.70
  -3  -2   0   -1.50    1.60
  -3  -2   0    0.30    0.80
  -3  -2   0    0.20    0.70
  -3  -2   0   -0.50    0.60
  -3  -2   0    1.20    1.40
  -3  -2   0    1.30    0.80
   3   2   0   -0.90    0.80
   3   2   0    0.20    1.30
   3   2   0    0.70    0.70
   3   2   0    0.30    0.80
   3   2   0    0.00    1.50
   3   2   0   -0.30    0.80
   3   2   0    0.40    0.70
  -4  -2   0  326.37    9.70
  -4  -2   0  330.77    9.50
  -4  -2   0  338.77    8.50
  -4  -2   0  337.87    8.40
  -4  -2   0  339.37    8.50
  -4  -2   0  343.27    8.50
  -4  -2   0  343.37    8.60
   4   2   0  335.47    9.70
   4   2   0  353.26    8.70
   4   2   0  337.87    8.50
   4   2   0  338.37    8.50
   4   2   0  338.37    9.40
   4   2   0  337.57    8.50
   4   2   0  322.67    8.60
  -5  -2   0   -0.50    0.80
  -5  -2   0   -0.90    1.10
  -5  -2   0    0.00    0.70
  -5  -2   0    0.20    1.00
  -5  -2   0    5.50    2.70
  -5  -2   0    1.10    1.00
   5   2   0   -2.60    1.70
   5   2   0    0.20    2.10
   5   2   0    0.70    0.90
   5   2   0   -0.80    1.00
   5   2   0   -0.70    0.80
   5   2   0    1.00    1.10
  -6  -2   0 1295.07   29.10
  -6  -2   0 1278.37   29.10
  -6  -2   0 1295.87   29.10
  -6  -2   0 1321.47   32.20
  -6  -2   0 1312.57   29.00
  -6  -2   0 1278.47   30.60
  -6  -2   0 1279.17   29.50
   6   2   0 1273.67   30.30
   6   2   0 1251.47   28.90
   6   2   0 1252.27   30.70
   6   2   0 1307.77   29.80
   6   2   0 1248.18   29.00
   6   2   0 1301.57   29.10
  -7  -2   0    4.90    1.50
  -7  -2   0    6.20    1.90
  -7  -2   0    4.80    1.80
  -7  -2   0    7.90    1.90
  -7  -2   0    2.40    2.50
  -7  -2   0    4.10    1.40
  -7  -2   0    0.40    2.70
  -7  -2   0    7.40    1.30
   7   2   0    5.80    1.70
   7   2   0    5.40    1.50
   7   2   0    8.00    2.30
   7   2   0    7.20    1.90
   7   2   0    4.90    2.40
   7   2   0    6.40    1.50
  -8  -2   0   28.40    2.70
  -8  -2   0   33.90    2.40
  -8  -2   0   32.70    3.10
  -8  -2   0   32.90    4.30
  -8  -2   0   33.10    2.80
  -8  -2   0   32.50    3.10
  -8  -2   0   37.40    5.40
  -8  -2   0   33.70    2.50
   8   2   0   27.50    2.50
   8   2   0   34.20    4.30
   8   2   0   32.90    4.80
   8   2   0   36.00    2.50
   8   2   0   33.30    3.20
   8   2   0   30.80    2.60
  -9  -2   0   43.10    3.00
  -9  -2   0   39.70    3.40
  -9  -2   0   39.30    3.10
  -9  -2   0   38.90    3.50
  -9  -2   0   36.80    4.80
  -9  -2   0   46.30    2.90
  -9  -2   0   39.30    5.00
  -9  -2   0   40.80    3.00
   9   2   0   42.10    3.60
   9   2   0   38.60    4.10
   9   2   0   35.40    4.70
   9   2   0   35.90    2.80
   9   2   0   44.10    2.90
   9   2   0   43.40    3.20
 -10  -2   0   53.19    3.00
 -10  -2   0   50.09    3.40
 -10  -2   0   49.99    3.90
 -10  -2   0   52.79    4.20
 -10  -2   0   51.69    6.70
 -10  -2   0   57.19    3.60
 -10  -2   0   54.19    7.00
 -10  -2   0   51.59    3.10
  10   2   0   56.59    4.20
  10   2   0   47.10    3.10
  10   2   0   51.29    3.30
  10   2   0   43.50    5.10
  10   2   0   43.60    5.20
  10   2   0   49.20    3.30
 -11  -2   0    9.30    2.20
 -11  -2   0    5.70    2.00
 -11  -2   0   11.00    3.90
 -11  -2   0    4.90    4.10
 -11  -2   0    4.10    2.40
 -11  -2   0   10.50    2.90
 -11  -2   0    7.50    1.80
 -11  -2   0   10.60    2.00
  11   2   0    9.50    1.90
  11   2   0    9.20    2.80
  11   2   0    2.20    2.70
  11   2   0    6.30    2.70
  11   2   0    9.70    2.00
  11   2   0    7.30    1.80
 -12  -2   0    1.70    1.90
 -12  -2   0    5.40    3.50
 -12  -2   0    8.50    1.80
 -12  -2   0    6.50    4.30
 -12  -2   0    6.00    1.90
 -12  -2   0    7.00    2.80
 -12  -2   0    6.60    2.10
 -12  -2   0    2.70    2.60
  12   2   0    3.90    2.70
  12   2   0    4.40    1.60
  12   2   0    8.00    2.00
  12   2   0    3.60    2.70
  12   2   0    9.20    2.10
  12   2   0    9.20    3.40
 -13  -2   0    1.40    4.40
 -13  -2   0   -1.00    1.50
 -13  -2   0    0.80    4.90
 -13  -2   0   -2.90    2.40
 -13  -2   0    0.70    1.40
 -13  -2   0    1.10    2.50
 -13  -2   0    0.60    1.90
 -13  -2   0   -0.80    1.80
  13   2   0   -5.60    2.40
  13   2   0    0.70    3.00
  13   2   0    0.70    1.70
  13   2   0    0.90    2.10
  13   2   0    0.50    2.60
 -14  -2   0   -3.10    3.00
 -14  -2   0    2.20    2.10
 -14  -2   0    3.20    1.70
 -14  -2   0    3.40    2.30
 -14  -2   0   -2.60    5.00
 -14  -2   0    0.80    5.10
 -14  -2   0    2.10    2.30
 -14  -2   0    5.90    3.40
  14   2   0   -0.50    3.50
  14   2   0    3.20    3.40
  14   2   0    3.80    2.00
  14   2   0    4.40    2.00
 -15  -2   0   37.60    5.40
 -15  -2   0   38.30    3.70
 -15  -2   0   42.40    4.60
 -15  -2   0   42.10    4.70
 -15  -2   0   36.30    3.60
 -15  -2   0   46.70    7.90
 -15  -2   0   41.30    5.40
 -15  -2   0   45.60    7.70
  15   2   0   34.20    4.00
  15   2   0   38.30    4.90
  15   2   0   37.60    4.00
  15   2   0   55.69    7.50
  15   2   0   56.59    6.30
  15   2   0   44.70    6.20
  15  -3   0    3.70    4.40
  15  -3   0    9.40    1.80
  15  -3   0   10.60    4.20
  15  -3   0   11.10    4.10
  15  -3   0   10.50    2.20
 -15   3   0   10.10    4.90
 -15   3   0   11.30    3.70
 -15   3   0   13.00    1.90
 -15   3   0    7.20    3.50
 -15   3   0    6.90    4.00
 -15   3   0   10.20    2.60
 -15   3   0   10.80    2.50
 -15   3   0    6.80    4.70
  14  -3   0    2.80    4.60
  14  -3   0    2.70    3.50
  14  -3   0    3.60    1.80
  14  -3   0    5.10    1.80
 -14   3   0    3.50    1.90
 -14   3   0    8.70    3.50
 -14   3   0    8.50    5.20
 -14   3   0    8.60    3.20
 -14   3   0    5.20    1.60
 -14   3   0    4.40    2.20
 -14   3   0    4.90    3.80
 -14   3   0    5.80    0.90
 -14   3   0    2.80    4.40
  13  -3   0    9.10    1.80
  13  -3   0    7.10    3.50
  13  -3   0   15.50    4.30
  13  -3   0    5.80    3.90
 -13   3   0    9.50    1.30
 -13   3   0    7.90    4.50
 -13   3   0    5.40    2.20
 -13   3   0   10.10    2.20
 -13   3   0    1.80    3.60
 -13   3   0    9.90    2.70
 -13   3   0   11.90    3.70
 -13   3   0   16.30    4.70
  12  -3   0   54.19    6.60
  12  -3   0   59.09    6.80
  12  -3   0   49.90    5.60
  12  -3   0   60.89    3.30
  12  -3   0   63.39    3.50
 -12   3   0   54.99    5.60
 -12   3   0   51.29    4.30
 -12   3   0   58.49    6.60
 -12   3   0   65.49    7.40
 -12   3   0   54.69    5.20
 -12   3   0   62.69    3.70
 -12   3   0   50.49    2.30
 -12   3   0   59.39    3.70
  11  -3   0    3.20    3.10
  11  -3   0    0.90    1.20
  11  -3   0    0.50    1.20
  11  -3   0    1.30    2.80
  11  -3   0    0.50    1.30
  11  -3   0    0.60    3.30
 -11   3   0    6.20    3.80
 -11   3   0    1.80    2.60
 -11   3   0    2.70    3.10
 -11   3   0    3.20    3.30
 -11   3   0    2.20    1.40
 -11   3   0    0.20    1.40
 -11   3   0    2.30    1.00
 -11   3   0   -1.00    1.50
  10  -3   0   75.39    6.20
  10  -3   0   78.09    5.20
  10  -3   0   71.59    3.30
  10  -3   0   74.49    3.30
  10  -3   0   66.49    5.40
 -10   3   0   72.49    3.50
 -10   3   0   72.99    3.10
 -10   3   0   78.29    5.90
 -10   3   0   72.09    3.60
 -10   3   0   70.99    2.70
 -10   3   0   65.49    5.20
 -10   3   0   65.99    6.20
 -10   3   0   74.79    5.00
   9  -3   0    5.00    2.20
   9  -3   0   -0.20    1.10
   9  -3   0   -1.50    2.80
   9  -3   0    4.20    2.70
   9  -3   0    0.50    1.10
  -9   3   0    2.60    1.00
  -9   3   0    2.70    1.40
  -9   3   0    1.10    1.10
  -9   3   0    3.00    2.20
  -9   3   0    0.30    2.30
  -9   3   0    2.40    2.40
  -9   3   0    2.50    1.10
  -9   3   0    3.60    2.30
   8  -3   0   75.29    5.20
   8  -3   0   70.69    2.80
   8  -3   0   68.39    4.90
   8  -3   0   69.59    2.80
   8  -3   0   73.89    4.40
  -8   3   0   69.69    2.70
  -8   3   0   70.39    4.50
  -8   3   0   69.59    2.90
  -8   3   0   63.79    5.10
  -8   3   0   66.99    5.30
  -8   3   0   68.69    4.30
  -8   3   0   71.29    3.10
   7  -3   0   44.90    5.70
   7  -3   0   63.39    3.90
   7  -3   0   60.79    2.40
   7  -3   0   67.19    4.70
   7  -3   0   68.89    2.60
  -7   3   0   61.49    2.60
  -7   3   0   65.09    2.40
  -7   3   0   62.79    2.70
  -7   3   0   63.59    3.90
  -7   3   0   64.89    4.10
  -7   3   0   65.29    2.60
  -7   3   0   69.29    4.70
  -7   3   0   60.99    4.80
   6  -3   0  247.48    6.20
   6  -3   0  244.78    6.20
   6  -3   0  242.78    8.30
   6  -3   0  248.48    7.80
   6  -3   0  255.57    8.60
  -6   3   0  249.68    6.40
  -6   3   0  251.07    6.20
  -6   3   0  228.08    6.10
  -6   3   0  250.97    8.50
  -6   3   0  245.98    8.30
  -6   3   0  250.07    7.70
  -6   3   0  244.78    6.30
   5  -3   0  136.89    5.60
   5  -3   0  143.49    3.90
   5  -3   0  142.19    6.20
   5  -3   0  146.89    3.80
   5  -3   0  146.09    3.80
   5  -3   0  137.79    5.80
  -5   3   0  147.09    5.90
  -5   3   0  146.59    4.10
  -5   3   0  145.19    3.90
  -5   3   0  133.99    3.80
  -5   3   0  142.89    5.10
  -5   3   0  146.79    5.70
  -5   3   0  145.49    5.20
  -5   3   0  141.29    3.90
   4  -3   0    9.40    0.80
   4  -3   0    9.70    1.50
   4  -3   0   11.70    1.90
   4  -3   0    8.50    0.80
   4  -3   0    8.20    0.90
  -4   3   0   11.00    0.90
  -4   3   0   12.60    1.00
  -4   3   0    9.20    1.80
  -4   3   0   10.40    3.40
  -4   3   0    8.60    1.60
  -4   3   0   12.30    2.10
   3  -3   0   53.19    1.60
   3  -3   0   54.39    1.90
   3  -3   0   57.09    1.60
   3  -3   0   52.99    2.40
   3  -3   0   51.29    3.10
   3  -3   0   54.49    2.60
  -3   3   0   55.09    1.90
  -3   3   0   53.59    2.50
  -3   3   0   55.49    2.50
  -3   3   0   55.49    1.70
  -3   3   0   43.80    3.10
  -3   3   0   54.69    3.10
  -3   3   0   53.79    2.00
  -3   3   0   55.29    1.70
   2  -3   0    2.40    0.70
   2  -3   0    2.20    0.40
   2  -3   0    2.00    0.80
   2  -3   0    2.50    0.40
   2  -3   0    1.50    0.90
   2  -3   0    1.00    0.80
  -2   3   0    1.00    0.80
  -2   3   0    2.50    0.40
  -2   3   0    2.70    0.70
  -2   3   0    2.90    0.90
  -2   3   0    2.70    0.40
  -2   3   0    2.10    0.60
  -2   3   0    1.30    1.10
  -2   3   0    2.10    0.90
   1  -3   0 1091.49   23.10
   1  -3   0 1096.69   23.50
   1  -3   0 1023.30   23.10
  -1   3   0 1089.29   24.00
  -1   3   0 1011.30   23.10
  -1   3   0 1006.40   23.10
  -1   3   0 1076.89   23.00
   0  -3   0   51.79    1.70
   0  -3   0   55.19    1.90
   0  -3   0   51.09    2.50
   0  -3   0   56.99    1.70
   0  -3   0   56.09    2.10
   0  -3   0   55.19    2.10
   0   3   0   52.29    1.70
   0   3   0   56.99    2.00
   0   3   0   56.89    1.90
   0   3   0   52.79    2.60
   0   3   0   56.29    2.50
   0   3   0   56.69    1.60
   0   3   0   55.99    1.80
  -1  -3   0  203.88    5.10
  -1  -3   0  204.08    4.60
  -1  -3   0  208.08    5.00
  -1  -3   0  186.58    5.70
  -1  -3   0  196.78    5.90
  -1  -3   0  205.98    5.50
  -1  -3   0  210.28    5.90
  -1  -3   0  208.98    5.40
  -1  -3   0  199.98    4.70
   1   3   0  209.08    5.10
   1   3   0  205.48    5.00
   1   3   0  196.28    5.80
   1   3   0  205.98    5.10
   1   3   0  196.98    4.50
   1   3   0  204.58    4.70
   1   3   0  213.98    5.40
   1   3   0  203.08    5.80
  -2  -3   0  649.43   14.70
  -2  -3   0  631.84   14.30
  -2  -3   0  650.93   15.00
  -2  -3   0  641.24   14.30
  -2  -3   0  656.83   14.60
  -2  -3   0  650.13   14.90
  -2  -3   0  629.54   15.60
  -2  -3   0  652.83   14.70
  -2  -3   0  630.74   15.60
   2   3   0  622.54   15.70
   2   3   0  632.24   14.30
   2   3   0  631.74   15.40
   2   3   0  663.63   14.90
   2   3   0  647.04   14.70
   2   3   0  650.53   14.70
   2   3   0  655.33   14.60
  -3  -3   0 2914.61   73.29
   3   3   0 2899.31   73.09
  -4  -3   0  154.08    8.30
  -4  -3   0  174.58    5.10
  -4  -3   0  169.68    5.00
  -4  -3   0  175.88    5.10
  -4  -3   0  173.88    5.10
  -4  -3   0  168.38    6.30
  -4  -3   0  171.98    5.10
   4   3   0  164.28    4.90
   4   3   0  175.68    5.10
   4   3   0  173.18    5.10
   4   3   0  173.68    5.10
   4   3   0  169.18    5.00
   4   3   0  165.78    6.30
  -5  -3   0  785.62   18.50
  -5  -3   0  767.02   18.40
  -5  -3   0  780.82   19.70
  -5  -3   0  787.72   18.50
  -5  -3   0  778.82   20.20
  -5  -3   0  800.02   18.70
  -5  -3   0  793.42   18.60
   5   3   0  778.62   18.40
   5   3   0  768.42   19.90
   5   3   0  797.42   18.50
   5   3   0  790.02   19.70
   5   3   0  801.82   18.50
   5   3   0  783.32   18.60
   5   3   0  808.12   18.80
  -6  -3   0   36.10    5.40
  -6  -3   0   35.10    2.60
  -6  -3   0   31.30    2.50
  -6  -3   0   30.50    2.20
  -6  -3   0   36.50    2.50
  -6  -3   0   33.30    4.00
  -6  -3   0   34.60    2.70
   6   3   0   37.00    2.50
   6   3   0   36.90    3.10
   6   3   0   31.40    2.40
   6   3   0   34.30    4.10
   6   3   0   31.10    3.70
   6   3   0   32.90    2.40
  -7  -3   0  313.37   11.50
  -7  -3   0  307.57    9.10
  -7  -3   0  306.27   10.40
  -7  -3   0  322.77    8.90
  -7  -3   0  313.27    9.10
  -7  -3   0  317.77   10.50
  -7  -3   0  306.47    8.80
  -7  -3   0  316.57    8.70
   7   3   0  329.47   10.40
   7   3   0  313.27    8.70
   7   3   0  306.87   10.50
   7   3   0  305.07    9.20
   7   3   0  312.57    8.70
   7   3   0  312.47    9.00
  -8  -3   0   35.10    2.70
  -8  -3   0   47.60    5.80
  -8  -3   0   40.60    3.20
  -8  -3   0   42.70    2.90
  -8  -3   0   42.70    6.20
  -8  -3   0   33.50    3.10
  -8  -3   0   40.40    2.70
  -8  -3   0   37.90    2.90
   8   3   0   43.90    2.80
   8   3   0   41.50    2.80
   8   3   0   39.20    3.80
   8   3   0   42.00    3.30
   8   3   0   40.70    2.80
   8   3   0   40.30    4.00
  -9  -3   0  131.49    7.40
  -9  -3   0  139.59    5.30
  -9  -3   0  128.29    5.70
  -9  -3   0  128.59    5.20
  -9  -3   0  135.89    4.90
  -9  -3   0  137.89    8.70
  -9  -3   0  134.79    5.80
  -9  -3   0  134.59    5.40
   9   3   0  132.99    5.20
   9   3   0  134.09    6.60
   9   3   0  136.19    5.10
   9   3   0  134.19    5.80
   9   3   0  134.49    5.20
   9   3   0  132.79    7.20
 -10  -3   0    0.80    1.60
 -10  -3   0   -1.00    4.00
 -10  -3   0    1.20    2.10
 -10  -3   0    2.70    1.70
 -10  -3   0   -0.90    1.70
 -10  -3   0    1.40    1.80
 -10  -3   0    3.10    2.20
 -10  -3   0    3.70    3.50
  10   3   0   -4.10    2.70
  10   3   0    2.80    2.10
  10   3   0    2.10    1.60
  10   3   0    4.70    2.70
  10   3   0    1.60    1.60
  10   3   0    1.10    1.50
 -11  -3   0   35.60    5.40
 -11  -3   0   34.90    3.80
 -11  -3   0   41.90    4.10
 -11  -3   0   43.20    3.50
 -11  -3   0   43.90    3.50
 -11  -3   0   40.20    3.00
 -11  -3   0   41.20    6.10
 -11  -3   0   39.90    3.40
  11   3   0   43.80    4.20
  11   3   0   46.20    3.60
  11   3   0   47.40    4.90
  11   3   0   41.60    3.20
  11   3   0   35.50    5.40
  11   3   0   44.30    3.30
 -12  -3   0    2.00    1.70
 -12  -3   0   -1.00    4.20
 -12  -3   0    0.40    2.00
 -12  -3   0    0.90    1.90
 -12  -3   0    0.90    2.50
 -12  -3   0   -4.00    2.10
 -12  -3   0    1.70    1.70
 -12  -3   0    4.10    4.80
  12   3   0    0.90    2.40
  12   3   0   -0.80    1.70
  12   3   0   -1.40    2.50
  12   3   0    1.70    1.70
  12   3   0    0.80    1.60
  12   3   0   -1.70    2.80
 -13  -3   0    6.80    2.60
 -13  -3   0    7.60    3.00
 -13  -3   0   13.50    2.40
 -13  -3   0   14.40    2.50
 -13  -3   0   11.60    3.20
 -13  -3   0    8.00    2.30
 -13  -3   0   10.40    5.00
 -13  -3   0   12.40    5.70
  13   3   0   12.40    3.40
  13   3   0    4.50    3.50
  13   3   0    7.20    2.30
  13   3   0   11.20    2.40
  13   3   0    5.90    2.10
  13   3   0   10.60    3.30
 -14  -3   0   11.70    2.40
 -14  -3   0   11.90    6.30
 -14  -3   0   13.20    3.70
 -14  -3   0   14.20    2.60
 -14  -3   0   12.60    3.70
 -14  -3   0   13.70    5.60
 -14  -3   0   10.60    2.90
 -14  -3   0    8.90    2.90
  14   3   0   13.80    4.80
  14   3   0    6.50    2.50
  14   3   0   12.90    3.00
  14   3   0   13.60    3.70
  14   3   0   13.30    3.60
  14   3   0   12.10    2.50
 -15  -3   0   44.10    5.00
 -15  -3   0   48.10    4.70
 -15  -3   0   69.49   11.30
 -15  -3   0   57.69    5.80
 -15  -3   0   57.99    5.00
 -15  -3   0   48.20    5.90
 -15  -3   0   43.90    3.80
 -15  -3   0   63.39    8.80
  15   3   0   56.99    6.50
  15   3   0   64.69    7.70
  15   3   0   51.79    4.20
  15   3   0   47.60    4.50
  15   3   0   50.49    5.20
  15   3   0   62.39    7.60
  15  -4   0    6.10    4.00
  15  -4   0    5.70    1.80
  15  -4   0    6.40    3.70
  15  -4   0    3.90    4.10
  15  -4   0    4.00    1.60
 -15   4   0    2.40    2.30
 -15   4   0    9.10    2.30
 -15   4   0    5.70    4.50
 -15   4   0   -0.60    6.10
 -15   4   0    9.50    3.80
 -15   4   0    7.60    4.80
 -15   4   0    1.60    3.30
  14  -4   0   -1.20    3.40
  14  -4   0   -5.20    3.50
  14  -4   0    3.50    3.70
  14  -4   0   -0.80    1.20
  14  -4   0   -4.40    1.40
 -14   4   0   -3.80    3.10
 -14   4   0   -2.00    1.70
 -14   4   0   -1.40    4.80
 -14   4   0    1.00    3.10
 -14   4   0   -1.70    9.90
 -14   4   0   -0.60    3.00
 -14   4   0    0.70    0.60
  13  -4   0   56.49    3.50
  13  -4   0   59.89    3.50
  13  -4   0   50.59    6.40
  13  -4   0   55.89    6.60
  13  -4   0   66.99    7.60
 -13   4   0   49.70    2.20
 -13   4   0   64.59    8.00
 -13   4   0   58.99    4.30
 -13   4   0   62.29    4.00
 -13   4   0   50.29    7.30
 -13   4   0   59.89    5.10
 -13   4   0   56.39    6.30
 -13   4   0   56.69    3.80
  12  -4   0   27.20    4.90
  12  -4   0   13.60    4.20
  12  -4   0   18.50    2.20
  12  -4   0   17.50    2.20
  12  -4   0   27.50    5.10
 -12   4   0   18.60    2.00
 -12   4   0   19.20    4.50
 -12   4   0   19.30    4.00
 -12   4   0   18.40    1.60
 -12   4   0   20.70    4.70
 -12   4   0   20.70    2.50
 -12   4   0   17.10    2.80
 -12   4   0   25.20    5.00
  11  -4   0  125.59    7.60
  11  -4   0  141.69    7.20
  11  -4   0  131.09    8.30
  11  -4   0  125.79    4.60
  11  -4   0  143.89    5.40
 -11   4   0  136.89    8.10
 -11   4   0  122.19    3.90
 -11   4   0  136.39    5.20
 -11   4   0  124.59    8.20
 -11   4   0  130.69    4.30
 -11   4   0  127.59    5.10
 -11   4   0  138.79    7.00
 -11   4   0  125.99    7.20
  10  -4   0    0.00    1.10
  10  -4   0   -1.40    2.60
  10  -4   0    1.90    3.00
  10  -4   0   -1.20    1.60
 -10   4   0   -0.20    1.30
 -10   4   0   -0.60    1.70
 -10   4   0    1.90    1.60
 -10   4   0   -0.50    2.20
 -10   4   0    2.90    1.20
 -10   4   0   -2.80    2.60
 -10   4   0   -1.30    3.10
 -10   4   0    0.60    1.00
   9  -4   0   89.39    3.30
   9  -4   0   83.79    5.10
   9  -4   0   91.19    3.30
   9  -4   0   92.79    5.80
   9  -4   0   94.09    6.30
  -9   4   0   87.59    3.20
  -9   4   0   94.19    5.20
  -9   4   0   91.29    5.90
  -9   4   0   98.79    6.30
  -9   4   0   93.49    3.80
  -9   4   0   91.69    5.40
  -9   4   0   97.39    3.80
   8  -4   0   71.99    5.00
   8  -4   0   77.59    2.80
   8  -4   0   79.69    4.60
   8  -4   0   76.59    5.60
   8  -4   0   82.69    2.90
  -8   4   0   78.59    5.30
  -8   4   0   76.29    3.10
  -8   4   0   72.79    4.70
  -8   4   0   76.39    2.90
  -8   4   0   70.09    5.40
  -8   4   0   76.79    3.00
  -8   4   0   76.09    4.50
   7  -4   0  377.66   11.90
   7  -4   0  358.16   11.60
   7  -4   0  371.86    9.00
   7  -4   0  369.36    9.00
   7  -4   0  359.96    9.00
   7  -4   0  366.16   10.90
  -7   4   0  365.86    9.00
  -7   4   0  383.76   11.80
  -7   4   0  365.96    9.20
  -7   4   0  367.66   10.90
  -7   4   0  369.16   11.80
  -7   4   0  380.96    9.30
  -7   4   0  389.76   11.20
   6  -4   0  187.88    6.70
   6  -4   0  196.88    8.40
   6  -4   0  191.18    5.00
   6  -4   0  195.98    5.10
   6  -4   0  196.08    5.30
  -6   4   0  200.28    7.60
  -6   4   0  202.08    7.60
  -6   4   0  200.48    6.80
  -6   4   0  197.38    5.20
  -6   4   0  201.08    5.30
  -6   4   0  208.18    7.10
  -6   4   0  195.78    5.30
   5  -4   0  405.06   11.90
   5  -4   0  407.06    9.80
   5  -4   0  431.56   11.10
   5  -4   0  412.46    9.40
   5  -4   0  395.46    9.40
  -5   4   0  392.76   12.80
  -5   4   0  413.76   11.90
  -5   4   0  399.36    9.60
  -5   4   0  421.06   11.20
  -5   4   0  415.36    9.70
  -5   4   0  405.56    9.70
  -5   4   0  418.66   11.20
  -5   4   0  406.06    9.70
   4  -4   0   68.09    3.20
   4  -4   0   67.79    3.10
   4  -4   0   71.49    2.60
   4  -4   0   68.49    2.00
   4  -4   0   69.29    2.00
   4  -4   0   67.19    3.80
  -4   4   0   67.39    3.30
  -4   4   0   71.49    2.20
  -4   4   0   68.49    2.20
  -4   4   0   67.39    2.40
  -4   4   0   64.19    3.90
  -4   4   0   73.49    3.90
  -4   4   0   69.39    3.30
   3  -4   0  789.62   18.10
   3  -4   0  759.52   16.70
   3  -4   0  739.23   16.70
   3  -4   0  750.82   17.50
   3  -4   0  770.52   17.80
   3  -4   0  749.53   18.00
  -3   4   0  783.72   17.00
  -3   4   0  766.52   16.90
  -3   4   0  765.62   17.90
  -3   4   0  777.22   17.30
  -3   4   0  738.83   18.80
  -3   4   0  776.02   18.00
   2  -4   0   27.00    1.50
   2  -4   0   28.60    1.10
   2  -4   0   25.30    1.60
   2  -4   0   29.50    1.50
   2  -4   0   29.80    2.10
   2  -4   0   29.90    1.10
   2  -4   0   32.30    1.90
  -2   4   0   27.80    1.50
  -2   4   0   27.40    1.20
  -2   4   0   25.80    1.20
  -2   4   0   27.30    1.70
  -2   4   0   26.70    1.90
  -2   4   0   28.40    3.80
   1  -4   0 1312.97   29.40
   1  -4   0 1413.26   30.30
   1  -4   0 1393.66   29.50
  -1   4   0 1400.06   29.50
  -1   4   0 1298.07   29.50
  -1   4   0 1309.87   29.40
   0  -4   0  813.82   18.20
   0  -4   0  830.42   18.60
   0  -4   0  825.52   18.40
   0  -4   0  843.32   18.90
   0  -4   0  792.82   18.40
   0  -4   0  817.42   19.60
   0  -4   0  843.82   19.10
   0   4   0  838.42   18.50
   0   4   0  829.52   18.20
   0   4   0  829.52   19.60
   0   4   0  833.62   18.90
   0   4   0  840.02   18.60
   0   4   0  833.12   18.50
   0   4   0  838.42   19.70
  -1  -4   0   34.30    2.60
  -1  -4   0   32.40    2.00
  -1  -4   0   31.00    1.60
  -1  -4   0   32.10    3.00
  -1  -4   0   36.60    1.70
  -1  -4   0   38.50    1.20
   1   4   0   32.70    3.00
   1   4   0   33.30    2.70
   1   4   0   33.00    1.30
   1   4   0   36.90    1.80
   1   4   0   30.80    1.60
   1   4   0   37.30    2.00
  -2  -4   0  134.89    5.50
  -2  -4   0  135.59    4.00
  -2  -4   0  135.19    4.30
  -2  -4   0  130.19    3.40
  -2  -4   0  133.99    5.00
  -2  -4   0  134.49    4.40
  -2  -4   0  141.99    4.10
  -2  -4   0  138.09    3.50
  -2  -4   0  137.59    4.00
   2   4   0  132.19    3.40
   2   4   0  133.29    3.40
   2   4   0  139.39    4.30
   2   4   0  140.59    4.00
   2   4   0  132.89    5.10
   2   4   0  136.39    4.00
   2   4   0  126.79    5.10
   2   4   0  139.09    4.00
  -3  -4   0    0.60    2.10
  -3  -4   0    0.60    0.80
  -3  -4   0    2.50    1.00
  -3  -4   0    1.30    1.10
  -3  -4   0    1.40    0.90
  -3  -4   0    0.10    0.70
  -3  -4   0    0.60    1.10
  -3  -4   0    1.40    2.30
  -3  -4   0    1.40    1.10
   3   4   0    0.40    1.00
   3   4   0    0.40    2.00
   3   4   0    0.00    0.80
   3   4   0    0.80    0.70
   3   4   0    1.50    2.60
   3   4   0    2.00    0.90
   3   4   0    2.80    1.00
  -4  -4   0  127.69    4.20
  -4  -4   0  119.89    5.50
  -4  -4   0  135.99    5.40
  -4  -4   0  122.09    6.00
  -4  -4   0  134.09    6.70
  -4  -4   0  128.09    4.30
  -4  -4   0  130.99    4.30
  -4  -4   0  123.39    4.00
   4   4   0  124.89    4.10
   4   4   0  124.49    3.90
   4   4   0  132.79    4.70
   4   4   0  122.39    6.30
   4   4   0  125.39    4.20
   4   4   0  123.69    4.00
   4   4   0  121.29    5.70
  -5  -4   0    1.60    1.30
  -5  -4   0    0.00    0.90
  -5  -4   0    1.10    1.30
  -5  -4   0   -0.70    1.20
  -5  -4   0   -0.40    1.20
  -5  -4   0   -0.70    2.20
  -5  -4   0    1.80    2.40
  -5  -4   0    1.20    1.00
   5   4   0    2.50    1.40
   5   4   0    2.70    2.60
   5   4   0    0.30    1.00
   5   4   0    0.20    1.00
   5   4   0    1.20    1.30
   5   4   0    1.10    1.20
   5   4   0   -1.10    2.20
  -6  -4   0  988.20   24.60
  -6  -4   0  997.80   23.10
  -6  -4   0  948.21   25.30
  -6  -4   0 1003.10   23.20
  -6  -4   0  993.90   23.20
  -6  -4   0 1015.20   23.20
   6   4   0 1006.10   23.20
   6   4   0  946.71   23.80
   6   4   0  970.20   24.80
   6   4   0  966.30   24.40
   6   4   0  978.60   23.00
  -7  -4   0    5.30    1.70
  -7  -4   0    5.80    1.80
  -7  -4   0    5.40    1.80
  -7  -4   0    8.90    3.10
  -7  -4   0    7.20    1.80
  -7  -4   0   10.90    2.40
  -7  -4   0    7.60    3.80
   7   4   0    9.20    1.90
   7   4   0   11.90    4.40
   7   4   0   12.30    1.90
   7   4   0    8.60    2.90
   7   4   0   10.60    2.00
   7   4   0   10.90    2.00
  -8  -4   0  130.59    5.40
  -8  -4   0  127.49    8.60
  -8  -4   0  135.29    5.20
  -8  -4   0  138.29    5.10
  -8  -4   0  140.99    5.30
  -8  -4   0  143.09    5.60
  -8  -4   0  132.79    5.30
  -8  -4   0  136.39    7.20
   8   4   0  136.79    7.20
   8   4   0  128.59    5.00
   8   4   0  131.49    5.40
   8   4   0  134.99    5.20
   8   4   0  143.19    7.10
   8   4   0  140.69    5.20
  -9  -4   0   20.60    2.50
  -9  -4   0   18.60    2.60
  -9  -4   0   15.90    2.30
  -9  -4   0   18.00    4.60
  -9  -4   0   19.60    4.00
  -9  -4   0   19.10    2.50
  -9  -4   0   17.60    2.50
  -9  -4   0   20.80    2.50
   9   4   0   19.00    3.20
   9   4   0   18.20    2.40
   9   4   0   23.00    2.60
   9   4   0   18.50    3.30
   9   4   0   16.20    2.30
   9   4   0   22.00    2.80
 -10  -4   0   41.00    6.20
 -10  -4   0   36.20    2.80
 -10  -4   0   34.10    3.30
 -10  -4   0   35.70    5.90
 -10  -4   0   36.90    3.20
 -10  -4   0   32.30    3.00
 -10  -4   0   29.20    3.40
 -10  -4   0   27.90    3.40
  10   4   0   30.20    3.50
  10   4   0   39.40    3.10
  10   4   0   31.60    4.50
  10   4   0   30.10    3.00
  10   4   0   32.40    3.10
  10   4   0   35.40    4.50
 -11  -4   0    0.40    2.30
 -11  -4   0    3.00    1.90
 -11  -4   0    2.60    1.90
 -11  -4   0    8.70    5.20
 -11  -4   0    2.90    2.40
 -11  -4   0    3.10    1.90
 -11  -4   0    8.10    5.10
 -11  -4   0    2.30    1.90
  11   4   0    5.40    3.10
  11   4   0    6.80    2.40
  11   4   0    4.80    1.90
  11   4   0    6.20    3.10
  11   4   0    8.40    2.20
  11   4   0    9.00    2.10
 -12  -4   0    8.50    2.90
 -12  -4   0   10.10    2.30
 -12  -4   0   10.20    2.50
 -12  -4   0   10.00    2.90
 -12  -4   0   11.00    2.40
 -12  -4   0    7.10    5.40
 -12  -4   0    8.90    2.30
 -12  -4   0   12.10    6.00
  12   4   0    8.70    2.40
  12   4   0    8.40    3.20
  12   4   0    7.10    2.20
  12   4   0    6.90    2.90
  12   4   0    5.50    2.10
  12   4   0    5.10    3.40
 -13  -4   0   37.40    7.20
 -13  -4   0   33.50    4.10
 -13  -4   0   38.20    7.20
 -13  -4   0   34.60    4.40
 -13  -4   0   33.60    3.80
 -13  -4   0   38.90    3.50
 -13  -4   0   31.30    3.70
 -13  -4   0   28.60    3.30
  13   4   0   33.20    3.50
  13   4   0   33.80    3.50
  13   4   0   42.70    4.80
  13   4   0   33.40    4.80
  13   4   0   37.10    5.10
  13   4   0   29.20    3.80
 -14  -4   0   52.99    5.50
 -14  -4   0   56.89    5.20
 -14  -4   0   58.59    4.80
 -14  -4   0   63.49    4.90
 -14  -4   0   61.29    8.60
 -14  -4   0   58.29    4.30
 -14  -4   0   60.99    4.30
 -14  -4   0   57.69    8.10
  14   4   0   64.49    5.80
  14   4   0   57.19    4.50
  14   4   0   58.09    6.90
  14   4   0   54.39    4.30
  14   4   0   62.19    4.50
  14   4   0   50.39    6.10
 -15  -4   0   17.00    4.30
 -15  -4   0   21.50    3.80
 -15  -4   0   21.90    5.10
 -15  -4   0   21.20    3.20
 -15  -4   0   25.00    3.60
 -15  -4   0   19.30    3.80
 -15  -4   0   18.40    3.40
 -15  -4   0    9.00    6.90
  15   4   0   18.70    4.50
  15   4   0   25.30    5.70
  15   4   0   24.70    3.60
  15   4   0   19.60    3.20
  15   4   0   23.70    3.40
  15   4   0   18.00    4.20
  15  -5   0    3.90    1.60
  15  -5   0    3.80    3.70
  15  -5   0    2.60    3.90
  15  -5   0   -0.10    1.50
  15  -5   0    0.20    3.70
 -15   5   0    2.30    3.60
 -15   5   0    3.30    2.60
 -15   5   0    5.30    2.40
 -15   5   0    3.50    4.60
 -15   5   0    0.80    3.80
 -15   5   0    6.20    4.70
  14  -5   0   -2.30    3.70
  14  -5   0    1.90    1.50
  14  -5   0    5.20    4.30
  14  -5   0    7.70    4.00
  14  -5   0    2.30    1.60
 -14   5   0    4.10    3.50
 -14   5   0    1.10    2.40
 -14   5   0    5.00    2.50
 -14   5   0   -4.20    7.50
 -14   5   0    1.50    3.90
 -14   5   0    7.80    4.60
 -14   5   0    2.50    1.80
  13  -5   0   -0.10    1.30
  13  -5   0    6.40    5.00
  13  -5   0    2.40    4.00
  13  -5   0    1.10    1.40
  13  -5   0   -7.00    3.80
 -13   5   0   -0.90    2.00
 -13   5   0    0.90    3.00
 -13   5   0    1.80    1.90
 -13   5   0    3.40    1.70
 -13   5   0    3.30    1.20
 -13   5   0    0.90    4.50
 -13   5   0   -1.00    4.40
  12  -5   0   97.69    4.00
  12  -5   0   93.69    7.30
  12  -5   0  105.69    8.70
  12  -5   0   98.09    7.70
  12  -5   0   92.69    4.00
 -12   5   0   90.69    3.30
 -12   5   0  108.29    4.90
 -12   5   0   96.39    8.20
 -12   5   0  100.69    6.20
 -12   5   0   95.09    3.80
 -12   5   0  118.89    7.70
 -12   5   0   97.49    4.60
 -12   5   0  112.79    9.00
  11  -5   0    9.00    1.40
  11  -5   0    8.90    3.10
  11  -5   0    9.80    1.50
  11  -5   0    8.60    3.60
 -11   5   0    9.20    3.60
 -11   5   0    7.30    1.70
 -11   5   0    7.40    3.60
 -11   5   0    7.50    1.30
 -11   5   0    7.80    1.80
 -11   5   0    7.00    3.40
 -11   5   0    9.10    3.20
 -11   5   0    8.70    1.50
  10  -5   0   17.20    3.30
  10  -5   0   16.90    3.90
  10  -5   0   14.40    1.50
  10  -5   0   16.40    1.70
 -10   5   0   17.80    3.50
 -10   5   0   16.50    1.90
 -10   5   0   20.30    2.10
 -10   5   0   21.40    3.80
 -10   5   0   19.80    3.30
 -10   5   0   19.50    1.90
 -10   5   0   23.80    3.90
   9  -5   0    7.60    1.20
   9  -5   0    6.50    1.10
   9  -5   0    9.30    2.70
   9  -5   0    8.50    3.00
  -9   5   0    8.60    2.80
  -9   5   0    6.90    1.20
  -9   5   0    7.50    2.10
  -9   5   0    7.60    1.40
  -9   5   0    5.10    1.40
  -9   5   0    8.70    2.90
  -9   5   0    6.60    2.90
   8  -5   0   71.19    4.50
   8  -5   0   75.39    2.90
   8  -5   0   72.49    5.10
   8  -5   0   76.29    2.60
  -8   5   0   76.59    3.10
  -8   5   0   78.79    4.60
  -8   5   0   74.69    3.00
  -8   5   0   72.89    4.70
  -8   5   0   73.89    5.20
  -8   5   0   74.69    2.80
  -8   5   0   74.59    2.90
  -8   5   0   75.49    5.60
   7  -5   0   93.29    2.90
   7  -5   0   91.99    5.50
   7  -5   0   91.19    4.70
   7  -5   0   92.79    3.30
  -7   5   0   91.39    5.60
  -7   5   0   87.49    3.10
  -7   5   0   87.39    3.10
  -7   5   0   99.79    4.90
  -7   5   0   94.39    3.20
  -7   5   0   95.79    5.00
  -7   5   0   94.89    5.70
  -7   5   0   95.49    3.30
   6  -5   0  245.88    8.00
   6  -5   0  253.07    9.10
   6  -5   0  247.48    6.70
   6  -5   0  253.07    6.10
   6  -5   0  232.58    6.10
  -6   5   0  257.37    8.20
  -6   5   0  258.97    9.10
  -6   5   0  243.38    6.50
  -6   5   0  252.97    6.50
  -6   5   0  256.27    8.30
  -6   5   0  251.87    6.60
  -6   5   0  252.67    6.50
  -6   5   0  252.77    9.10
   5  -5   0  247.48    7.50
   5  -5   0  243.28    9.60
   5  -5   0  242.28    6.60
   5  -5   0  238.58    5.80
   5  -5   0  239.98    5.80
  -5   5   0  250.57    8.60
  -5   5   0  242.08    8.60
  -5   5   0  240.68    6.40
  -5   5   0  237.38    7.60
  -5   5   0  250.07    6.20
  -5   5   0  243.58    6.10
  -5   5   0  242.18    7.70
   4  -5   0  210.28    6.40
   4  -5   0  204.18    5.00
   4  -5   0  220.88    6.60
   4  -5   0  208.88    5.90
   4  -5   0  208.98    5.00
   4  -5   0  199.68    6.40
  -4   5   0  209.08    6.60
  -4   5   0  213.78    5.30
  -4   5   0  209.58    5.60
  -4   5   0  210.38    5.70
  -4   5   0  207.28    7.40
  -4   5   0  211.58    6.60
   3  -5   0  123.69    4.00
   3  -5   0  122.59    4.10
   3  -5   0  122.29    3.90
   3  -5   0  122.09    3.20
   3  -5   0  131.09    5.60
   3  -5   0  122.29    5.50
   3  -5   0  126.19    3.20
  -3   5   0  124.39    3.40
  -3   5   0  126.79    4.30
  -3   5   0  121.59    5.30
  -3   5   0  124.09    3.40
  -3   5   0  122.79    3.80
   2  -5   0  279.17    7.50
   2  -5   0  265.37    7.50
   2  -5   0  286.67    6.60
   2  -5   0  296.27    7.60
   2  -5   0  279.97    7.30
   2  -5   0  281.27    7.10
  -2   5   0  289.57    6.90
  -2   5   0  231.08   10.00
  -2   5   0  281.27    6.70
  -2   5   0  284.77    7.60
  -2   5   0  275.97    7.20
  -2   5   0  277.57    7.40
   1  -5   0  774.22   18.30
   1  -5   0  733.73   16.90
   1  -5   0  689.53   15.90
   1  -5   0  722.93   16.30
   1  -5   0  730.53   16.00
   1  -5   0  703.93   16.60
   1  -5   0  741.73   16.60
   1  -5   0  682.53   16.00
  -1   5   0  737.93   16.60
  -1   5   0  720.23   16.00
  -1   5   0  727.93   16.30
  -1   5   0  698.73   16.50
  -1   5   0  701.63   18.70
  -1   5   0  675.63   15.80
  -1   5   0  701.13   16.60
  -1   5   0  670.43   15.90
   0  -5   0 1099.79   25.30
   0  -5   0 1084.69   24.20
   0  -5   0 1076.29   24.40
   0  -5   0 1103.29   24.40
   0  -5   0 1114.49   25.10
   0  -5   0 1105.99   26.00
   0  -5   0 1118.79   24.70
   0   5   0 1107.59   24.50
   0   5   0 1119.59   24.70
   0   5   0 1095.79   24.20
   0   5   0 1110.89   24.50
   0   5   0 1066.89   25.90
   0   5   0 1117.69   25.10
   0   5   0 1111.99   26.20
  -1  -5   0  106.49    3.80
  -1  -5   0  106.49    5.10
  -1  -5   0   98.39    4.70
  -1  -5   0  101.89    3.40
  -1  -5   0  110.79    4.50
  -1  -5   0  101.19    2.80
  -1  -5   0  102.29    3.30
   1   5   0  104.29    3.60
   1   5   0  104.29    3.40
   1   5   0  105.79    3.40
   1   5   0  103.09    4.70
   1   5   0  100.89    2.80
   1   5   0  102.79    3.80
   1   5   0  105.09    6.00
  -2  -5   0    2.20    0.80
  -2  -5   0   -1.40    1.90
  -2  -5   0    1.60    0.90
  -2  -5   0    1.70    0.70
  -2  -5   0    7.10    4.10
  -2  -5   0    0.70    1.20
  -2  -5   0    0.70    1.70
  -2  -5   0    0.70    0.70
  -2  -5   0    1.60    0.50
  -2  -5   0    2.00    0.50
  -2  -5   0    3.40    1.10
   2   5   0    0.80    0.90
   2   5   0    1.80    2.60
   2   5   0    2.60    0.90
   2   5   0    2.90    0.80
   2   5   0    1.50    0.40
   2   5   0    1.90    1.10
   2   5   0    1.70    1.90
   2   5   0    1.70    0.50
  -3  -5   0  506.05   14.20
  -3  -5   0  507.75   13.70
  -3  -5   0  528.65   13.10
  -3  -5   0  526.05   12.60
  -3  -5   0  532.95   13.00
  -3  -5   0  504.65   11.80
  -3  -5   0  529.25   12.60
  -3  -5   0  498.25   11.80
  -3  -5   0  514.35   12.30
   3   5   0  511.65   12.50
   3   5   0  518.25   12.30
   3   5   0  506.85   11.80
   3   5   0  524.25   12.90
   3   5   0  522.15   12.60
   3   5   0  504.75   13.90
   3   5   0  507.15   14.40
  -4  -5   0   95.49    3.20
  -4  -5   0   93.89    5.00
  -4  -5   0   97.09   10.50
  -4  -5   0   91.29    3.60
  -4  -5   0   94.39    3.70
  -4  -5   0   93.59    3.60
  -4  -5   0   93.49    4.00
  -4  -5   0   91.49    3.90
   4   5   0   86.99    5.20
   4   5   0   91.49    3.50
   4   5   0   88.49    3.10
   4   5   0   94.89    3.50
   4   5   0   94.99    3.70
   4   5   0   92.29    4.80
   4   5   0   93.19    6.00
  -5  -5   0  826.82   22.00
  -5  -5   0  851.21   20.20
  -5  -5   0  825.82   21.20
  -5  -5   0  847.22   20.30
  -5  -5   0  834.12   19.70
  -5  -5   0  849.52   19.90
  -5  -5   0  843.82   19.90
  -5  -5   0  831.32   19.40
   5   5   0  848.02   19.60
   5   5   0  826.52   19.80
   5   5   0  839.02   19.50
   5   5   0  812.32   21.30
   5   5   0  857.61   20.10
   5   5   0  797.82   21.50
   5   5   0  861.91   19.90
  -6  -5   0   54.89    4.80
  -6  -5   0   54.49    3.00
  -6  -5   0   41.20    6.20
  -6  -5   0   51.69    3.10
  -6  -5   0   55.69    3.60
  -6  -5   0   55.49    3.40
  -6  -5   0   53.19    2.90
  -6  -5   0   59.69    3.30
   6   5   0   54.79    4.80
   6   5   0   56.29    3.20
   6   5   0   56.49    3.10
   6   5   0   58.39    3.70
   6   5   0   57.19    3.30
   6   5   0   53.69    5.30
  -7  -5   0  228.98    7.30
  -7  -5   0  245.98    7.60
  -7  -5   0  238.78    7.70
  -7  -5   0  230.48    9.20
  -7  -5   0  245.88    7.80
  -7  -5   0  242.88    7.40
  -7  -5   0  230.18   10.60
  -7  -5   0  237.78    7.50
   7   5   0  243.58    7.50
   7   5   0  241.38    7.50
   7   5   0  235.68    7.50
   7   5   0  231.88    9.50
   7   5   0  237.58    7.30
   7   5   0  229.28    7.30
   7   5   0  233.58    9.00
  -8  -5   0   61.29    3.40
  -8  -5   0   65.19    6.60
  -8  -5   0   56.99    3.50
  -8  -5   0   56.59    7.60
  -8  -5   0   64.39    3.80
  -8  -5   0   59.29    3.30
  -8  -5   0   57.99    3.80
  -8  -5   0   67.99    3.80
   8   5   0   58.19    3.60
   8   5   0   62.39    3.70
   8   5   0   64.49    4.90
   8   5   0   67.79    3.70
   8   5   0   63.29    3.40
   8   5   0   69.89    6.00
  -9  -5   0  164.78    6.50
  -9  -5   0  161.68    6.30
  -9  -5   0  164.78    6.30
  -9  -5   0  168.88    9.40
  -9  -5   0  173.98    6.40
  -9  -5   0  170.28    6.30
  -9  -5   0  168.18    6.50
  -9  -5   0  173.08   10.20
  -9  -5   0  170.98    6.40
   9   5   0  175.08    6.80
   9   5   0  163.68    6.20
   9   5   0  169.68    6.30
   9   5   0  165.78    7.90
   9   5   0  155.58    6.10
   9   5   0  160.08    7.80
 -10  -5   0   20.50    3.00
 -10  -5   0   20.70    2.90
 -10  -5   0   24.20    3.50
 -10  -5   0   27.80    5.60
 -10  -5   0   24.80    4.80
 -10  -5   0   22.80    2.90
 -10  -5   0   19.00    2.70
 -10  -5   0   18.80    2.70
 -10  -5   0   19.20    2.70
  10   5   0   19.80    2.70
  10   5   0   25.60    3.20
  10   5   0   20.70    3.90
  10   5   0   21.90    3.70
  10   5   0   24.80    3.10
  10   5   0   25.10    2.90
 -11  -5   0   15.30    2.40
 -11  -5   0   19.40    2.70
 -11  -5   0   12.80    2.80
 -11  -5   0   16.60    2.60
 -11  -5   0   14.90    2.90
 -11  -5   0   17.30    5.70
 -11  -5   0   12.00    5.50
 -11  -5   0   15.80    2.90
 -11  -5   0   11.70    2.50
  11   5   0   11.80    3.60
  11   5   0   19.20    2.80
  11   5   0   15.10    2.50
  11   5   0   20.50    2.50
  11   5   0   13.20    3.50
  11   5   0   14.60    3.30
 -12  -5   0    2.10    1.70
 -12  -5   0   -0.20    2.10
 -12  -5   0    0.60    4.50
 -12  -5   0    2.10    2.20
 -12  -5   0    0.40    2.40
 -12  -5   0    1.80    5.60
 -12  -5   0   -1.30    2.30
 -12  -5   0   -0.90    2.40
 -12  -5   0   -1.30    2.30
  12   5   0    2.90    3.30
  12   5   0   -1.30    1.80
  12   5   0   -1.70    1.90
  12   5   0    0.60    2.10
  12   5   0    1.00    2.30
  12   5   0   -2.10    2.50
 -13  -5   0   63.69    5.70
 -13  -5   0   55.49    4.40
 -13  -5   0   53.59    8.10
 -13  -5   0   65.59    4.80
 -13  -5   0   65.99    5.30
 -13  -5   0   67.39    5.20
 -13  -5   0   71.89   10.90
 -13  -5   0   64.09    4.60
  13   5   0   67.09    4.60
  13   5   0   59.79    6.10
  13   5   0   58.89    7.60
  13   5   0   59.29    4.00
  13   5   0   68.39    5.50
  13   5   0   64.69    4.60
 -14  -5   0   -1.20    2.80
 -14  -5   0   -1.00    2.50
 -14  -5   0   -2.60    3.00
 -14  -5   0    2.60    2.60
 -14  -5   0   -6.50    3.00
 -14  -5   0    2.00    2.80
 -14  -5   0   -2.50    5.10
 -14  -5   0   -0.90    2.20
  14   5   0    0.00    3.00
  14   5   0   -1.00    2.80
  14   5   0   -0.70    2.20
  14   5   0    1.70    2.30
  14   5   0    0.30    3.30
  14   5   0    1.80    3.10
 -15  -5   0   20.60    3.50
 -15  -5   0   23.90    4.00
 -15  -5   0   33.40    5.00
 -15  -5   0   23.50    7.50
 -15  -5   0   25.70    3.70
 -15  -5   0   20.40    4.40
 -15  -5   0   19.80    4.20
 -15  -5   0   23.30    7.70
 -15  -5   0   18.00    3.20
  15   5   0   17.70    3.20
  15   5   0   26.50    3.70
  15   5   0   24.20    4.60
  15   5   0   19.50    4.70
  15   5   0   28.30    3.70
  15  -6   0   14.80    1.80
  15  -6   0   23.40    5.40
  15  -6   0   15.90    2.00
  15  -6   0   17.00    4.70
 -15   6   0   17.40    2.80
 -15   6   0   27.90    6.80
 -15   6   0   19.40    5.70
 -15   6   0   13.60    2.60
 -15   6   0   16.70    4.50
 -15   6   0   23.00    5.10
 -15   6   0   14.20    1.70
  14  -6   0    6.40    4.60
  14  -6   0    4.60    1.40
  14  -6   0    4.40    1.50
  14  -6   0   -4.30    3.80
 -14   6   0    4.20    4.10
 -14   6   0    2.70    4.40
 -14   6   0    5.40    1.50
 -14   6   0    3.30    2.30
 -14   6   0    2.40    4.50
 -14   6   0    3.30    3.70
 -14   6   0    5.70    0.90
 -14   6   0    2.70    1.90
 -14   6   0    2.50    1.90
  13  -6   0   39.80    6.10
  13  -6   0   41.10    5.80
  13  -6   0   37.00    2.60
 -13   6   0   40.20    5.50
 -13   6   0   40.60    5.90
 -13   6   0   34.80    3.30
 -13   6   0   41.30    6.60
 -13   6   0   49.50   13.60
 -13   6   0   38.30    3.20
 -13   6   0   34.50    2.10
 -13   6   0   40.20    2.80
 -13   6   0   38.40    2.60
  12  -6   0   18.00    2.10
  12  -6   0   19.50    2.10
  12  -6   0   30.60    5.50
  12  -6   0   25.90    4.70
 -12   6   0   16.70    4.50
 -12   6   0   15.90    5.00
 -12   6   0   22.20    2.30
 -12   6   0   27.20    5.30
 -12   6   0   19.20    3.10
 -12   6   0   18.30    2.20
 -12   6   0   19.00    4.40
 -12   6   0   16.90    2.30
  11  -6   0   25.70    4.20
  11  -6   0   23.30    1.80
  11  -6   0   20.50    1.80
  11  -6   0   23.50    4.70
 -11   6   0   25.50    4.50
 -11   6   0   22.00    4.40
 -11   6   0   22.70    3.80
 -11   6   0   24.70    2.10
 -11   6   0   26.50    2.00
 -11   6   0   23.00    4.10
 -11   6   0   22.30    2.30
  10  -6   0   13.10    1.50
  10  -6   0   17.80    3.90
  10  -6   0   15.40    1.60
  10  -6   0   12.00    3.20
 -10   6   0   16.10    2.10
 -10   6   0   17.20    1.70
 -10   6   0   15.20    3.60
 -10   6   0   16.00    3.60
 -10   6   0   21.10    3.70
 -10   6   0   13.30    1.60
 -10   6   0   14.50    1.60
 -10   6   0   13.60    3.10
   9  -6   0   98.89    5.60
   9  -6   0   92.39    3.50
   9  -6   0   91.59    3.10
   9  -6   0   94.69    6.10
   9  -6   0   91.09    3.10
  -9   6   0   87.79    5.50
  -9   6   0   86.99    6.30
  -9   6   0   93.19    3.60
  -9   6   0   96.19    3.40
  -9   6   0   89.69    6.60
  -9   6   0   92.69    5.40
  -9   6   0   89.89    3.30
  -9   6   0   89.79    3.50
   8  -6   0   -3.40    1.80
   8  -6   0   -2.60    2.30
   8  -6   0    0.90    0.70
   8  -6   0   -0.50    0.60
   8  -6   0   -0.80    1.00
  -8   6   0    0.10    2.30
  -8   6   0    1.00    2.30
  -8   6   0   -1.10    1.00
  -8   6   0    0.80    0.80
  -8   6   0    1.10    1.10
  -8   6   0   -1.90    1.90
  -8   6   0   -0.60    0.90
  -8   6   0    0.10    2.20
   7  -6   0  202.38    6.10
   7  -6   0  194.18    5.20
   7  -6   0  211.78    5.30
   7  -6   0  204.28    8.50
   7  -6   0  215.78    7.60
  -7   6   0  203.88    8.30
  -7   6   0  223.08    7.80
  -7   6   0  213.78    7.80
  -7   6   0  214.68    5.90
  -7   6   0  217.18    5.80
  -7   6   0  211.98    5.90
  -7   6   0  210.28    5.80
  -7   6   0  209.18    8.60
   6  -6   0  116.09    3.30
   6  -6   0  123.19    5.20
   6  -6   0  114.19    6.30
   6  -6   0  122.29    4.20
   6  -6   0  121.29    3.30
  -6   6   0  126.59    6.60
  -6   6   0  123.49    3.70
  -6   6   0  121.69    3.70
  -6   6   0  121.19    6.40
  -6   6   0  117.19    5.40
  -6   6   0  125.29    5.50
  -6   6   0  116.79    3.90
   5  -6   0  334.87    7.90
   5  -6   0  350.06    9.10
   5  -6   0  350.16    9.70
  -5   6   0  341.67    8.80
  -5   6   0  343.97    8.30
  -5   6   0  341.67   11.20
  -5   6   0  348.07   10.00
  -5   6   0  338.87    8.30
   4  -6   0  150.18    5.80
   4  -6   0  155.28    3.90
   4  -6   0  151.58    5.40
   4  -6   0  150.78    5.10
   4  -6   0  150.28    3.90
   4  -6   0  151.48    5.20
  -4   6   0  160.08    6.60
  -4   6   0  155.38    5.40
  -4   6   0  158.38    4.20
  -4   6   0  152.88    4.70
  -4   6   0  153.18    4.20
  -4   6   0  159.18    5.60
   3  -6   0  233.48    6.50
   3  -6   0  233.08    6.90
   3  -6   0  225.98    6.40
   3  -6   0  223.98    5.60
   3  -6   0  220.68    8.30
   3  -6   0  243.48    6.80
   3  -6   0  241.88    5.70
  -3   6   0  234.68    6.80
  -3   6   0  233.88    8.20
  -3   6   0  232.48    7.00
  -3   6   0  230.68    5.90
  -3   6   0  238.78    6.50
  -3   6   0  239.38    5.90
  -3   6   0  227.38    8.10
   2  -6   0  119.49    5.10
   2  -6   0  119.29    4.30
   2  -6   0  123.49    3.40
   2  -6   0  117.19    4.00
   2  -6   0  116.19    4.00
   2  -6   0  120.49    3.40
   2  -6   0  119.09    3.70
  -2   6   0  115.29    4.00
  -2   6   0  117.59    4.00
  -2   6   0  119.49    5.50
  -2   6   0  127.49    4.40
  -2   6   0  118.89    3.50
   1  -6   0   14.20    1.10
   1  -6   0   15.70    1.90
   1  -6   0   14.70    1.10
   1  -6   0   16.80    2.50
   1  -6   0   12.60    1.30
   1  -6   0   14.20    1.70
   1  -6   0   15.90    1.70
   1  -6   0   17.30    1.30
  -1   6   0   18.00    1.90
  -1   6   0   16.70    1.30
  -1   6   0   18.70    1.30
  -1   6   0   14.60    0.90
  -1   6   0   15.60    1.10
  -1   6   0   18.20    2.70
  -1   6   0   17.30    1.60
   0  -6   0  260.27    6.90
   0  -6   0  260.57    6.60
   0  -6   0  244.58    7.40
   0  -6   0  249.88    6.30
   0  -6   0  250.37    8.30
   0  -6   0  257.57    7.60
   0  -6   0  264.57    6.70
   0   6   0  267.17    7.40
   0   6   0  263.37    6.70
   0   6   0  265.37    7.00
   0   6   0  253.67    8.50
   0   6   0  257.17    8.50
   0   6   0  264.77    6.70
   0   6   0  256.07    6.40
  -1  -6   0   13.40    1.70
  -1  -6   0   15.30    1.00
  -1  -6   0   14.10    2.50
  -1  -6   0   16.50    1.50
  -1  -6   0   12.80    1.50
  -1  -6   0   14.10    2.00
   1   6   0   17.10    2.60
   1   6   0   12.90    1.40
   1   6   0   18.10    2.00
   1   6   0   12.90    2.20
   1   6   0   14.10    1.80
   1   6   0   17.00    1.30
   1   6   0   13.60    1.50
  -2  -6   0  185.28    8.40
  -2  -6   0  194.18    6.10
  -2  -6   0  190.58    6.90
  -2  -6   0  190.58    6.20
  -2  -6   0  194.18    5.60
  -2  -6   0  182.18    4.60
  -2  -6   0  185.98    5.40
  -2  -6   0  180.78    5.40
  -2  -6   0  184.18    4.60
  -2  -6   0  176.68    4.50
   2   6   0  199.78    7.10
   2   6   0  197.08    5.60
   2   6   0  184.78    7.60
   2   6   0  195.58    7.10
   2   6   0  192.48    5.50
   2   6   0  183.38    4.30
   2   6   0  197.48    5.60
   2   6   0  187.48    4.60
  -3  -6   0  364.96    9.90
  -3  -6   0  353.76    8.50
  -3  -6   0  362.26    9.40
  -3  -6   0  347.77    9.10
  -3  -6   0  359.76   10.80
  -3  -6   0  354.46    8.60
  -3  -6   0  362.06   10.10
  -3  -6   0  355.66    9.30
  -3  -6   0  378.26   11.50
  -3  -6   0  340.07    8.40
   3   6   0  353.26   10.90
   3   6   0  349.67    8.40
   3   6   0  370.96    9.50
   3   6   0  357.66   11.50
   3   6   0  361.76    9.80
   3   6   0  361.96    9.40
   3   6   0  357.56    9.10
  -4  -6   0  134.79    4.00
  -4  -6   0  142.49    5.40
  -4  -6   0  140.59    4.60
  -4  -6   0  133.79    6.10
  -4  -6   0  141.89    4.90
  -4  -6   0  144.49    4.80
  -4  -6   0  136.49    6.90
  -4  -6   0  132.49    5.00
   4   6   0  140.09    5.10
   4   6   0  144.49    4.60
   4   6   0  128.89    7.10
   4   6   0  134.59    4.10
   4   6   0  146.59    4.80
   4   6   0  134.19    6.40
   4   6   0  141.29    5.20
  -5  -6   0  230.38    6.40
  -5  -6   0  230.98    7.00
  -5  -6   0  236.78    7.10
  -5  -6   0  227.18    8.40
  -5  -6   0  240.98    7.20
  -5  -6   0  228.08    9.50
  -5  -6   0  232.18    7.40
  -5  -6   0  225.38    7.50
   5   6   0  231.58    7.00
   5   6   0  225.68    6.50
   5   6   0  220.78    9.30
   5   6   0  234.88    7.70
   5   6   0  236.98    6.80
   5   6   0  214.78   11.90
   5   6   0  236.58    7.40
  -6  -6   0    4.40    3.40
  -6  -6   0    2.50    1.70
  -6  -6   0    3.20    1.20
  -6  -6   0    2.40    2.60
  -6  -6   0    6.60    1.70
  -6  -6   0    2.20    1.70
  -6  -6   0    0.30    1.60
  -6  -6   0    4.70    1.70
   6   6   0    1.40    3.10
   6   6   0    3.80    1.20
   6   6   0    2.70    1.80
   6   6   0    2.10    2.80
   6   6   0    2.60    1.80
   6   6   0    2.90    1.50
  -7  -6   0   -2.50    1.50
  -7  -6   0   -4.30    3.60
  -7  -6   0    0.80    1.50
  -7  -6   0    1.10    1.60
  -7  -6   0    0.50    1.60
  -7  -6   0    1.00    1.50
  -7  -6   0   -1.70    1.50
  -7  -6   0    0.20    2.70
   7   6   0   -0.40    1.00
   7   6   0   -2.30    2.70
   7   6   0    1.40    1.20
   7   6   0   -0.70    1.60
   7   6   0    0.70    1.60
   7   6   0   -0.60    2.60
  -8  -6   0  147.89    6.00
  -8  -6   0  160.98    6.20
  -8  -6   0  157.38    8.00
  -8  -6   0  158.38    6.00
  -8  -6   0  164.38    9.80
  -8  -6   0  154.08    6.00
  -8  -6   0  159.98    6.10
  -8  -6   0  151.48    5.60
  -8  -6   0  171.48    6.40
   8   6   0  147.49    8.30
   8   6   0  164.98    6.20
   8   6   0  149.69    6.80
   8   6   0  150.58    7.80
   8   6   0  157.98    5.90
   8   6   0  161.08    6.00
  -9  -6   0   -2.60    1.60
  -9  -6   0    1.90    1.80
  -9  -6   0   -3.30    4.20
  -9  -6   0   -1.20    1.70
  -9  -6   0   -1.20    1.90
  -9  -6   0    2.60    4.70
  -9  -6   0    0.90    2.00
  -9  -6   0    2.40    2.00
  -9  -6   0   -3.40    1.90
   9   6   0   -0.20    2.00
   9   6   0   -0.40    1.90
   9   6   0    0.10    2.10
   9   6   0   -0.20    3.60
   9   6   0   -0.30    1.70
   9   6   0    3.40    1.60
 -10  -6   0   84.69    4.90
 -10  -6   0   85.09    4.80
 -10  -6   0   82.79    4.80
 -10  -6   0   90.49    5.00
 -10  -6   0   89.69    4.80
 -10  -6   0   98.49    7.70
 -10  -6   0   86.09    4.70
 -10  -6   0   87.59    5.10
 -10  -6   0   90.29    9.80
  10   6   0   90.39    4.80
  10   6   0   92.49    4.90
  10   6   0   89.99    6.70
  10   6   0   97.79    5.10
  10   6   0   97.09    4.90
  10   6   0   76.79    7.00
 -11  -6   0   -2.20    4.10
 -11  -6   0   -3.60    1.80
 -11  -6   0   -3.50    5.20
 -11  -6   0    2.70    2.10
 -11  -6   0   -0.80    2.10
 -11  -6   0   -2.70    2.00
 -11  -6   0    2.50    2.20
 -11  -6   0    1.60    2.00
 -11  -6   0   -2.00    2.40
  11   6   0   -0.70    1.90
  11   6   0    0.20    1.20
  11   6   0   -2.50    2.60
  11   6   0   -4.00    1.70
  11   6   0    1.50    2.20
  11   6   0    2.60    3.10
 -12  -6   0  131.89    6.30
 -12  -6   0  119.79    6.50
 -12  -6   0  130.09    6.40
 -12  -6   0  130.59    6.50
 -12  -6   0  130.89    6.50
 -12  -6   0  126.29    6.50
 -12  -6   0  126.29   11.80
 -12  -6   0  122.89    9.30
 -12  -6   0  124.29    6.40
  12   6   0  130.49    8.10
  12   6   0  126.69    6.10
  12   6   0  128.19    6.20
  12   6   0  132.39    6.70
  12   6   0  128.29    8.60
  12   6   0  126.79    6.10
 -13  -6   0   -2.80    2.70
 -13  -6   0    7.20    6.30
 -13  -6   0    3.80    3.00
 -13  -6   0    1.00    2.70
 -13  -6   0    0.40    2.40
 -13  -6   0    2.70    2.40
 -13  -6   0   -3.30    6.10
 -13  -6   0    1.20    3.30
  13   6   0    0.20    2.90
  13   6   0    4.40    2.50
  13   6   0    0.50    2.10
  13   6   0   -1.20    2.70
  13   6   0    1.20    2.40
 -14  -6   0   30.50    4.20
 -14  -6   0   30.90    3.70
 -14  -6   0   36.40    4.40
 -14  -6   0   35.40    4.00
 -14  -6   0   38.80    7.00
 -14  -6   0   28.40    7.70
 -14  -6   0   28.40    4.30
 -14  -6   0   36.80    4.60
 -14  -6   0   26.50    4.60
  14   6   0   31.60    4.00
  14   6   0   38.40    4.20
  14   6   0   35.70    3.90
  14   6   0   27.20    5.30
  14   6   0   32.60    4.70
  14   6   0   33.30    5.20
 -15  -6   0    1.90    3.10
 -15  -6   0    7.10    2.80
 -15  -6   0    5.50    2.70
 -15  -6   0    7.70    3.40
 -15  -6   0    6.90    6.90
 -15  -6   0    4.40    5.70
 -15  -6   0    9.00    3.20
 -15  -6   0    4.30    2.50
 -15  -6   0   -0.40    3.30
  15   6   0   -3.40    3.00
  15   6   0    2.50    2.60
  15   6   0    5.50    2.60
  15   6   0    2.30    3.20
  15   6   0    2.90    3.60
  15  -7   0    5.40    1.40
  15  -7   0    7.10    1.60
  15  -7   0   10.20    5.10
  15  -7   0    8.90    4.60
 -15   7   0    6.70    1.50
 -15   7   0    8.50    1.40
 -15   7   0    1.40    2.50
 -15   7   0    2.00    1.80
 -15   7   0    3.70    4.10
 -15   7   0   12.30    5.10
 -15   7   0   17.00    4.80
  14  -7   0   35.90    6.20
  14  -7   0   32.60    5.50
  14  -7   0   24.70    2.20
  14  -7   0   27.20    2.20
 -14   7   0   38.60    6.40
 -14   7   0   24.50    5.00
 -14   7   0   28.80    2.30
 -14   7   0   26.10    1.70
 -14   7   0   26.00    9.30
 -14   7   0   36.80    6.40
 -14   7   0   31.60    3.50
 -14   7   0   27.30    2.50
 -14   7   0   29.60    3.40
  13  -7   0   12.20    4.40
  13  -7   0   20.10    5.30
  13  -7   0   11.40    1.50
  13  -7   0   11.50    1.80
 -13   7   0   10.80    6.10
 -13   7   0   17.00    4.70
 -13   7   0    8.30    4.50
 -13   7   0   13.00    3.80
 -13   7   0    8.20    4.10
 -13   7   0   14.10    1.80
 -13   7   0   16.00    2.00
 -13   7   0    6.80    3.80
  12  -7   0   36.30    5.60
  12  -7   0   25.30    1.90
  12  -7   0   24.50    1.90
  12  -7   0   34.60    5.00
 -12   7   0   26.70    5.50
 -12   7   0   26.90    2.60
 -12   7   0   26.70    4.90
 -12   7   0   34.20    5.70
 -12   7   0   23.20    4.80
 -12   7   0   26.60    2.30
  11  -7   0    1.00    0.90
  11  -7   0   -0.80    2.70
  11  -7   0    3.10    3.50
  11  -7   0    1.90    0.90
 -11   7   0   -2.20    2.70
 -11   7   0   -0.40    1.40
 -11   7   0   -0.70    1.40
 -11   7   0    2.50    1.50
 -11   7   0    3.00    1.30
 -11   7   0    4.10    2.60
 -11   7   0   -5.10    3.20
 -11   7   0   -1.20    3.00
  10  -7   0   10.60    1.20
  10  -7   0   11.00    1.10
  10  -7   0   15.20    3.30
  10  -7   0   16.30    3.90
 -10   7   0    7.50    3.00
 -10   7   0    6.50    3.20
 -10   7   0    9.10    2.10
 -10   7   0   12.80    1.70
 -10   7   0   11.70    1.60
 -10   7   0    8.70    3.20
 -10   7   0   11.40    3.40
 -10   7   0   11.70    1.80
   9  -7   0    5.50    2.60
   9  -7   0    5.30    0.80
   9  -7   0    5.70    1.00
   9  -7   0    3.60    3.10
  -9   7   0    4.70    1.70
  -9   7   0    6.30    3.10
  -9   7   0    2.90    1.00
  -9   7   0    4.70    1.40
  -9   7   0    5.10    1.40
  -9   7   0    9.00    3.10
  -9   7   0    1.30    2.50
  -9   7   0    8.00    2.80
   8  -7   0   30.80    4.60
   8  -7   0   32.10    1.50
   8  -7   0   26.50    3.60
   8  -7   0   31.50    1.50
   8  -7   0   36.60    2.80
  -8   7   0   33.30    2.40
  -8   7   0   30.50    3.80
  -8   7   0   33.30    2.60
  -8   7   0   31.90    4.80
  -8   7   0   35.40    2.30
  -8   7   0   34.80    3.80
  -8   7   0   33.90    2.00
  -8   7   0   34.70    4.70
   7  -7   0   66.59    3.30
   7  -7   0   65.99    2.10
   7  -7   0   63.89    4.20
   7  -7   0   64.39    2.10
  -7   7   0   59.89    5.40
  -7   7   0   64.69    5.40
  -7   7   0   66.09    4.40
  -7   7   0   64.19    4.40
  -7   7   0   62.19    3.10
  -7   7   0   63.99    3.50
  -7   7   0   66.49    2.70
   6  -7   0  154.88    4.20
   6  -7   0  166.68    4.20
   6  -7   0  169.78    5.60
   6  -7   0  168.88    6.20
  -6   7   0  168.78    6.60
  -6   7   0  165.28    6.60
  -6   7   0  180.88    6.20
  -6   7   0  153.68    7.80
  -6   7   0  161.88    4.70
  -6   7   0  170.38    7.80
  -6   7   0  169.98    4.80
   5  -7   0  117.39    4.50
   5  -7   0  119.19    4.90
   5  -7   0  108.89    3.10
   5  -7   0  112.19    3.10
  -5   7   0  118.19    3.60
  -5   7   0  114.79    6.30
  -5   7   0  117.49    5.20
  -5   7   0  113.89    5.00
  -5   7   0  114.39    3.60
   4  -7   0  421.76   11.70
   4  -7   0  451.65   12.00
   4  -7   0  439.46   11.50
   4  -7   0  435.36   11.60
   4  -7   0  422.56   10.10
   4  -7   0  458.75   10.30
  -4   7   0  444.06   10.60
  -4   7   0  440.16   13.30
  -4   7   0  451.55   11.50
  -4   7   0  448.56   13.50
  -4   7   0  447.46   10.60
  -4   7   0  461.25   11.90
  -4   7   0  448.76   12.00
   3  -7   0   55.29    4.70
   3  -7   0   50.79    2.60
   3  -7   0   52.79    2.80
   3  -7   0   49.60    2.00
   3  -7   0   51.49    1.90
   3  -7   0   48.30    2.80
   3  -7   0   52.49    2.60
  -3   7   0   46.20    4.10
  -3   7   0   50.19    2.60
  -3   7   0   50.09    2.80
  -3   7   0   50.29    2.10
  -3   7   0   52.79    3.10
  -3   7   0   57.69    4.40
   2  -7   0  253.57    7.20
   2  -7   0  237.98    7.10
   2  -7   0  247.88    6.60
   2  -7   0  254.87    6.30
   2  -7   0  250.87    7.60
   2  -7   0  255.57    6.30
   2  -7   0  258.17    7.30
  -2   7   0  250.37    8.70
  -2   7   0  247.58    6.50
  -2   7   0  252.47    7.30
  -2   7   0  246.18    6.50
  -2   7   0  257.67    7.20
  -2   7   0  248.28    7.00
   1  -7   0    3.40    0.90
   1  -7   0    3.50    1.20
   1  -7   0    3.70    0.70
   1  -7   0    2.50    1.10
   1  -7   0    4.70    1.50
   1  -7   0    4.60    0.80
   1  -7   0    1.90    2.00
  -1   7   0    4.90    1.50
  -1   7   0    2.20    2.20
  -1   7   0    6.50    1.40
  -1   7   0    3.00    0.90
  -1   7   0    2.70    0.60
  -1   7   0    3.80    0.60
  -1   7   0    2.40    0.90
  -1   7   0    3.20    1.10
   0  -7   0   17.50    1.60
   0  -7   0   16.40    1.50
   0  -7   0   17.20    1.50
   0  -7   0   17.30    2.00
   0  -7   0   19.50    2.70
   0  -7   0   15.00    1.70
   0  -7   0   18.40    1.40
   0   7   0   12.60    2.60
   0   7   0   18.70    1.50
   0   7   0   21.40    3.00
   0   7   0   22.00    1.70
   0   7   0   17.20    2.20
   0   7   0   15.60    3.00
   0   7   0   14.90    1.50
  -1  -7   0  163.18    5.60
  -1  -7   0  163.58    5.00
  -1  -7   0  159.28    6.70
  -1  -7   0  160.08    4.20
  -1  -7   0  172.68    6.00
  -1  -7   0  164.28    4.90
   1   7   0  163.68    5.50
   1   7   0  163.78    5.10
   1   7   0  161.98    4.30
   1   7   0  164.58    5.20
   1   7   0  165.98    7.20
   1   7   0  170.18    5.00
   1   7   0  160.28    7.00
  -2  -7   0  324.47    7.70
  -2  -7   0  344.27    8.80
  -2  -7   0  279.57    8.60
  -2  -7   0  333.17    9.70
  -2  -7   0  327.07   10.40
  -2  -7   0  335.17    8.60
  -2  -7   0  307.97    7.50
  -2  -7   0  337.17    9.40
  -2  -7   0  320.87    7.40
  -2  -7   0  327.77   10.60
   2   7   0  337.57    7.70
   2   7   0  342.27    8.80
   2   7   0  323.57    8.70
   2   7   0  333.17   10.90
   2   7   0  353.26    9.20
   2   7   0  333.07   11.90
   2   7   0  345.67    9.40
  -3  -7   0  161.78    4.50
  -3  -7   0  174.28    7.10
  -3  -7   0  169.88    4.50
  -3  -7   0  170.08    5.30
  -3  -7   0  178.18    5.60
  -3  -7   0  165.28    4.30
  -3  -7   0  166.48    7.50
  -3  -7   0  174.68    5.50
  -3  -7   0  176.88    6.30
  -3  -7   0  174.88    6.10
  -3  -7   0  172.08    4.50
   3   7   0  166.58    7.80
   3   7   0  170.78    5.40
   3   7   0  173.18    5.30
   3   7   0  177.28   10.40
   3   7   0  167.58    4.30
   3   7   0  152.38    6.70
   3   7   0  176.58    6.10
  -4  -7   0  343.07    9.30
  -4  -7   0  339.97    9.80
  -4  -7   0  356.06   10.20
  -4  -7   0  330.97    8.50
  -4  -7   0  339.37    9.30
  -4  -7   0  323.57   11.30
  -4  -7   0  329.67   10.80
  -4  -7   0  326.27    8.20
  -4  -7   0  323.17    9.00
   4   7   0  343.97    9.30
   4   7   0  339.27    8.90
   4   7   0  339.47   11.20
   4   7   0  328.97   11.70
   4   7   0  324.47    8.20
   4   7   0  341.47    9.80
  -5  -7   0   40.20    2.50
  -5  -7   0   35.90    4.40
  -5  -7   0   39.10    2.90
  -5  -7   0   39.00    5.60
  -5  -7   0   36.70    4.20
  -5  -7   0   36.00    3.10
  -5  -7   0   34.40    3.20
  -5  -7   0   33.90    2.80
   5   7   0   38.00    2.80
   5   7   0   34.20    2.10
   5   7   0   37.40    2.80
   5   7   0   42.70    3.10
   5   7   0   40.60    4.90
   5   7   0   40.20    5.80
   5   7   0   38.60    4.90
  -6  -7   0  348.97   10.40
  -6  -7   0  372.96   11.00
  -6  -7   0  354.66   12.30
  -6  -7   0  364.36   10.10
  -6  -7   0  355.86   10.20
  -6  -7   0  373.16   10.30
  -6  -7   0  357.66   11.90
   6   7   0  350.36   12.80
   6   7   0  353.06    9.50
   6   7   0  342.57   11.20
   6   7   0  366.96    9.80
   6   7   0  347.57   12.10
   6   7   0  369.06   10.60
   6   7   0  354.26   10.50
  -7  -7   0   26.20    2.50
  -7  -7   0   25.60    3.00
  -7  -7   0   22.00    2.30
  -7  -7   0   30.40    5.00
  -7  -7   0   30.40    4.10
  -7  -7   0   26.10    2.80
  -7  -7   0   25.90    3.00
  -7  -7   0   28.60    3.20
   7   7   0   26.10    2.40
   7   7   0   30.10    3.00
   7   7   0   30.60    2.60
   7   7   0   25.20    3.10
   7   7   0   30.40    2.80
   7   7   0   20.30    3.80
   7   7   0   20.60    4.20
  -8  -7   0    0.50    3.90
  -8  -7   0    2.10    2.10
  -8  -7   0    3.80    2.10
  -8  -7   0    5.60    2.60
  -8  -7   0    3.30    1.60
  -8  -7   0    7.40    2.10
  -8  -7   0    9.80    4.50
  -8  -7   0    7.30    2.10
  -8  -7   0    5.40    1.90
   8   7   0    4.90    1.90
   8   7   0    3.90    2.20
   8   7   0    6.90    2.10
   8   7   0    6.60    2.00
   8   7   0   10.00    3.40
   8   7   0   -0.90    3.30
   8   7   0    0.80    1.70
  -9  -7   0  125.79    5.30
  -9  -7   0  129.79   10.20
  -9  -7   0  123.89    5.90
  -9  -7   0  134.09    5.90
  -9  -7   0  125.59    6.00
  -9  -7   0  122.79    5.30
  -9  -7   0  125.69    5.50
  -9  -7   0  133.39    8.20
  -9  -7   0  130.69    5.80
   9   7   0  129.79    8.70
   9   7   0  138.09    5.80
   9   7   0  123.79    5.70
   9   7   0  129.29    8.40
   9   7   0  126.89    5.90
   9   7   0  137.39    5.80
 -10  -7   0   43.40    3.60
 -10  -7   0   45.40    6.60
 -10  -7   0   44.30    4.00
 -10  -7   0   42.00    4.00
 -10  -7   0   45.80    4.10
 -10  -7   0   41.10    3.90
 -10  -7   0   45.60    6.90
 -10  -7   0   45.70    4.20
 -10  -7   0   43.80    4.00
  10   7   0   49.30    3.60
  10   7   0   41.50    5.20
  10   7   0   40.30    3.20
  10   7   0   41.10    3.80
  10   7   0   42.10    6.40
  10   7   0   37.20    3.60
 -11  -7   0  109.49    5.70
 -11  -7   0   96.69    5.30
 -11  -7   0  101.79    9.40
 -11  -7   0  109.19    5.80
 -11  -7   0   92.39    5.50
 -11  -7   0   99.09    5.10
 -11  -7   0   95.89    5.50
 -11  -7   0  106.79   11.00
 -11  -7   0   93.69    5.70
  11   7   0   98.09    7.40
  11   7   0  105.99    5.50
  11   7   0   92.59    5.40
  11   7   0  102.19    8.00
  11   7   0  100.29    5.50
  11   7   0   99.69    5.40
 -12  -7   0    6.20    2.80
 -12  -7   0    0.50    2.60
 -12  -7   0    8.50    5.00
 -12  -7   0    4.00    2.80
 -12  -7   0    5.00    6.20
 -12  -7   0    3.50    2.80
 -12  -7   0    5.90    2.60
 -12  -7   0    7.40    2.60
 -12  -7   0    0.00    2.50
  12   7   0    0.40    2.30
  12   7   0    6.40    2.60
  12   7   0    6.50    3.40
  12   7   0    8.50    2.80
  12   7   0    3.50    2.60
  12   7   0    7.60    3.80
 -13  -7   0   34.00    4.20
 -13  -7   0   37.60    4.20
 -13  -7   0   44.00    9.80
 -13  -7   0   34.40    4.20
 -13  -7   0   35.40    4.20
 -13  -7   0   51.59    7.00
 -13  -7   0   33.60    4.10
 -13  -7   0   38.10    4.30
 -13  -7   0   33.20    4.60
  13   7   0   39.50    4.60
  13   7   0   40.30    4.10
  13   7   0   38.80    4.30
  13   7   0   36.20    5.40
  13   7   0   29.60    4.90
  13   7   0   36.90    4.20
 -14  -7   0    1.70    2.90
 -14  -7   0    4.20    2.60
 -14  -7   0    1.00    2.70
 -14  -7   0    3.90    3.00
 -14  -7   0    9.40    2.60
 -14  -7   0   -2.20    6.40
 -14  -7   0    4.40    3.10
 -14  -7   0    6.60    3.00
  14   7   0    2.10    3.50
  14   7   0    4.80    3.00
  14   7   0    3.60    2.80
  14   7   0    2.70    2.50
  14   7   0    0.50    3.20
  14   7   0    6.90    3.70
  15  -8   0   -6.60    3.90
  15  -8   0    0.90    0.80
  15  -8   0    0.00    0.80
 -15   8   0    1.00    1.10
 -15   8   0   -1.20    2.60
 -15   8   0    0.30    3.50
 -15   8   0   -3.10    1.70
 -15   8   0    0.50    1.10
 -15   8   0   -4.30    1.90
  14  -8   0   24.70    5.70
  14  -8   0   17.80    1.60
  14  -8   0   20.20    1.60
  14  -8   0   14.40    4.70
 -14   8   0   20.60    1.90
 -14   8   0   30.40    6.10
 -14   8   0   28.70    3.20
 -14   8   0   19.80    5.20
 -14   8   0   27.40    3.70
 -14   8   0   19.00    2.50
 -14   8   0   25.10    5.10
 -14   8   0   30.10    5.80
 -14   8   0   20.80    2.10
  13  -8   0    0.50    0.90
  13  -8   0    2.20    5.10
 -13   8   0    3.40    1.70
 -13   8   0   -3.50    3.70
 -13   8   0    1.30    3.60
 -13   8   0    6.50    4.80
 -13   8   0    0.40    1.50
  12  -8   0    1.80    0.90
  12  -8   0    5.10    3.40
  12  -8   0    0.70    0.80
  12  -8   0   -3.30    3.70
 -12   8   0   -0.70    3.40
 -12   8   0    0.90    1.60
 -12   8   0    3.00    1.80
 -12   8   0    3.50    4.30
 -12   8   0   -7.10    3.20
 -12   8   0   -1.70    3.90
  11  -8   0    5.00    0.90
  11  -8   0    7.00    3.10
  11  -8   0    4.90    3.90
  11  -8   0    4.90    0.80
 -11   8   0    4.90    1.70
 -11   8   0   11.10    3.50
 -11   8   0    4.60    3.70
 -11   8   0    4.20    1.60
 -11   8   0    4.80    1.60
 -11   8   0    3.80    2.20
 -11   8   0    8.80    3.90
  10  -8   0   -0.30    1.30
  10  -8   0    1.70    0.60
  10  -8   0   -2.00    3.30
  10  -8   0    2.00    0.60
  10  -8   0    4.70    3.20
 -10   8   0    4.90    3.00
 -10   8   0    0.30    3.00
 -10   8   0   -2.30    2.70
 -10   8   0    2.00    1.20
 -10   8   0    2.60    1.30
 -10   8   0    4.10    2.90
 -10   8   0    2.30    1.70
 -10   8   0    1.50    1.70
   9  -8   0   28.50    2.40
   9  -8   0   26.40    3.60
   9  -8   0   26.60    1.30
   9  -8   0   25.10    1.30
  -9   8   0   25.90    4.50
  -9   8   0   29.20    4.00
  -9   8   0   28.20    2.10
  -9   8   0   25.90    2.20
  -9   8   0   28.40    2.60
  -9   8   0   23.70    2.30
  -9   8   0   30.50    4.10
  -9   8   0   30.80    4.70
   8  -8   0   19.10    2.30
   8  -8   0   20.30    1.10
   8  -8   0   19.20    1.10
   8  -8   0   20.50    3.20
  -8   8   0   26.00    4.00
  -8   8   0   21.60    3.30
  -8   8   0   19.70    2.10
  -8   8   0   18.20    1.80
  -8   8   0   22.60    4.00
  -8   8   0   17.90    3.30
  -8   8   0   19.80    1.90
  -8   8   0   19.80    2.10
   7  -8   0   30.70    1.30
   7  -8   0   30.60    3.40
   7  -8   0   27.30    2.60
   7  -8   0   29.20    1.30
  -7   8   0   32.30    2.40
  -7   8   0   30.60    1.80
  -7   8   0   29.70    4.30
  -7   8   0   28.00    3.60
  -7   8   0   28.30    3.50
  -7   8   0   31.40    4.20
  -7   8   0   28.70    2.00
   6  -8   0    0.40    1.80
   6  -8   0    1.50    0.60
   6  -8   0    0.40    1.40
   6  -8   0    2.00    0.60
  -6   8   0    0.70    2.40
  -6   8   0    2.10    1.00
  -6   8   0    3.10    2.80
  -6   8   0    2.00    1.20
  -6   8   0    4.20    2.20
   5  -8   0    1.10    1.70
   5  -8   0    0.10    0.60
   5  -8   0   -1.80    1.50
   5  -8   0    0.50    1.30
   5  -8   0   -0.10    0.50
  -5   8   0   -1.20    0.80
  -5   8   0   -1.50    1.70
  -5   8   0   -0.10    1.70
  -5   8   0   -0.50    0.90
  -5   8   0   -0.40    1.10
  -5   8   0   -0.10    2.30
   4  -8   0    5.90    1.70
   4  -8   0    3.80    1.50
   4  -8   0    6.40    1.70
   4  -8   0    5.50    1.70
   4  -8   0    7.60    1.50
  -4   8   0    3.80    1.80
  -4   8   0    6.40    1.80
  -4   8   0    0.20    2.50
  -4   8   0    3.90    1.80
  -4   8   0    4.40    0.90
  -4   8   0    7.00    1.10
  -4   8   0    3.60    2.50
   3  -8   0   90.89    3.80
   3  -8   0   87.29    3.90
   3  -8   0   88.99    4.10
   3  -8   0   84.99    2.80
   3  -8   0   94.29    2.90
   3  -8   0   89.89    4.10
   3  -8   0   91.99    3.50
  -3   8   0   80.89    5.50
  -3   8   0   91.29    4.20
  -3   8   0   82.79    4.20
  -3   8   0   88.69    3.10
  -3   8   0   95.59    3.20
  -3   8   0   86.39    3.80
  -3   8   0   89.79    5.70
   2  -8   0   51.49    2.30
   2  -8   0   50.79    2.10
   2  -8   0   52.99    3.40
   2  -8   0   50.49    3.10
   2  -8   0   56.29    3.10
   2  -8   0   58.09    3.30
   2  -8   0   51.59    2.20
  -2   8   0   52.59    3.10
  -2   8   0   53.19    2.30
  -2   8   0   49.99    3.00
  -2   8   0   52.49    2.70
  -2   8   0   54.39    4.70
  -2   8   0   56.39    2.40
   1  -8   0   68.69    2.30
   1  -8   0   69.19    2.80
   1  -8   0   73.39    3.50
   1  -8   0   75.69    2.80
   1  -8   0   73.09    3.30
   1  -8   0   74.69    3.80
   1  -8   0   70.89    5.00
   1  -8   0   75.09    2.80
  -1   8   0   75.59    3.50
  -1   8   0   68.79    4.90
  -1   8   0   75.19    2.90
  -1   8   0   61.99    2.30
  -1   8   0   72.09    5.20
  -1   8   0   74.69    3.50
  -1   8   0   70.39    2.80
  -1   8   0   73.99    3.00
  -1   8   0   67.89    2.10
   0  -8   0   72.19    4.80
   0  -8   0   68.99    3.30
   0  -8   0   62.79    2.50
   0  -8   0   69.59    3.80
   0  -8   0   61.79    3.40
   0  -8   0   70.09    2.80
   0  -8   0   66.99    2.80
   0   8   0   71.79    3.70
   0   8   0   61.99    5.20
   0   8   0   66.09    3.00
   0   8   0   67.79    4.80
   0   8   0   62.89    2.90
   0   8   0   66.49    2.60
   0   8   0   72.19    3.60
  -1  -8   0  229.18    7.60
  -1  -8   0  224.78    6.40
  -1  -8   0  220.78    5.60
  -1  -8   0  224.68    7.20
  -1  -8   0  225.18    6.50
  -1  -8   0  226.28    6.40
  -1  -8   0  219.98    8.40
   1   8   0  227.58    7.20
   1   8   0  218.08    5.70
   1   8   0  225.18    8.60
   1   8   0  228.68    6.60
   1   8   0  222.98    8.80
   1   8   0  216.28    6.50
   1   8   0  227.08    6.50
  -2  -8   0  160.28    6.10
  -2  -8   0  167.18    4.30
  -2  -8   0  171.18    7.60
  -2  -8   0  179.38    5.50
  -2  -8   0  165.58    6.50
  -2  -8   0  154.68    7.10
  -2  -8   0  172.98    5.30
   2   8   0  166.78    4.30
   2   8   0  167.18    5.60
   2   8   0  163.68    5.90
   2   8   0  169.68    5.50
   2   8   0  166.98    7.90
   2   8   0  187.58    7.60
   2   8   0  162.18    5.30
  -3  -8   0  527.25   13.10
  -3  -8   0  493.45   11.30
  -3  -8   0  532.65   12.80
  -3  -8   0  510.75   11.70
  -3  -8   0  502.75   11.70
  -3  -8   0  530.55   14.30
  -3  -8   0  501.65   13.80
  -3  -8   0  514.15   15.00
  -3  -8   0  474.05   11.70
  -3  -8   0  508.05   15.20
  -3  -8   0  526.45   13.00
   3   8   0  514.55   15.60
   3   8   0  530.15   12.90
   3   8   0  536.85   13.20
   3   8   0  458.25   11.30
   3   8   0  516.55   13.10
   3   8   0  533.25   15.30
   3   8   0  522.65   13.80
  -4  -8   0   68.89    2.50
  -4  -8   0   65.59    2.70
  -4  -8   0   61.89    4.10
  -4  -8   0   63.69    5.90
  -4  -8   0   64.19    3.50
  -4  -8   0   61.99    3.90
  -4  -8   0   62.39    3.40
  -4  -8   0   57.29    4.90
  -4  -8   0   66.19    3.50
   4   8   0   71.39    3.60
   4   8   0   60.49    3.60
   4   8   0   63.19    5.50
   4   8   0   68.39    3.30
   4   8   0   65.39    3.50
   4   8   0   60.39    2.20
   4   8   0   63.59    6.60
  -5  -8   0  195.18    6.40
  -5  -8   0  197.88    5.90
  -5  -8   0  199.88    6.70
  -5  -8   0  195.98    6.60
  -5  -8   0  191.48    7.10
  -5  -8   0  200.18    7.50
  -5  -8   0  195.78    9.20
  -5  -8   0  198.18    8.40
   5   8   0  204.68    7.20
   5   8   0  193.38    6.50
   5   8   0  202.68    6.70
   5   8   0  202.58    6.60
   5   8   0  184.68    9.50
   5   8   0  193.38    5.50
   5   8   0  183.58    8.60
  -6  -8   0   11.80    2.40
  -6  -8   0   11.60    3.90
  -6  -8   0   10.60    2.30
  -6  -8   0    7.40    2.10
  -6  -8   0   14.90    2.40
  -6  -8   0   13.00    1.90
  -6  -8   0    6.20    2.50
  -6  -8   0   14.90    2.20
  -6  -8   0   15.60    3.50
   6   8   0    9.60    2.10
   6   8   0   10.90    4.10
   6   8   0   12.60    1.60
   6   8   0   12.70    2.00
   6   8   0   10.50    4.00
   6   8   0   10.60    2.20
   6   8   0    8.50    2.50
  -7  -8   0   37.50    5.40
  -7  -8   0   30.80    3.50
  -7  -8   0   33.00    2.60
  -7  -8   0   32.00    3.80
  -7  -8   0   25.70    3.20
  -7  -8   0   35.80    4.60
  -7  -8   0   34.30    3.20
  -7  -8   0   32.70    3.10
   7   8   0   31.20    2.50
   7   8   0   29.50    3.40
   7   8   0   37.10    4.80
   7   8   0   34.00    3.10
   7   8   0   33.40    2.50
   7   8   0   29.00    5.00
   7   8   0   30.20    3.00
  -8  -8   0  145.59    8.30
  -8  -8   0  150.18    5.60
  -8  -8   0  160.38    6.30
  -8  -8   0  142.89   10.10
  -8  -8   0  164.68    8.50
  -8  -8   0  159.28    6.60
  -8  -8   0  150.78    5.60
  -8  -8   0  150.28    6.30
  -8  -8   0  154.38    6.80
   8   8   0  150.48    6.20
   8   8   0  152.88    5.60
   8   8   0  145.69    5.90
   8   8   0  143.29    6.40
   8   8   0  154.28    8.70
   8   8   0  154.78    5.80
   8   8   0  161.58    9.30
  -9  -8   0   51.49    3.40
  -9  -8   0   50.39    4.30
  -9  -8   0   53.09    4.10
  -9  -8   0   50.79    4.20
  -9  -8   0   52.49    4.20
  -9  -8   0   49.60    3.40
  -9  -8   0   43.50    6.30
  -9  -8   0   47.50    4.00
  -9  -8   0   56.39    7.10
   9   8   0   54.09    3.80
   9   8   0   48.50    6.60
   9   8   0   47.00    3.40
   9   8   0   58.99    7.20
   9   8   0   51.29    4.00
   9   8   0   44.70    4.20
   9   8   0   45.20    3.90
 -10  -8   0  145.59    6.10
 -10  -8   0  154.98    7.10
 -10  -8   0  149.49    6.10
 -10  -8   0  159.48   10.00
 -10  -8   0  150.08    6.90
 -10  -8   0  148.39    6.70
 -10  -8   0  156.68    6.80
 -10  -8   0  138.69    6.30
 -10  -8   0  153.68    9.20
  10   8   0  160.18    9.70
  10   8   0  151.68    6.30
  10   8   0  155.68    6.90
  10   8   0  158.18    6.70
  10   8   0  144.49    9.00
  10   8   0  155.78    6.40
 -11  -8   0    0.70    2.50
 -11  -8   0    5.90    2.90
 -11  -8   0    0.30    3.10
 -11  -8   0    6.70    3.00
 -11  -8   0    5.00    4.70
 -11  -8   0    1.80    2.70
 -11  -8   0    2.00    2.50
 -11  -8   0    5.30    6.00
 -11  -8   0    5.00    2.30
  11   8   0   10.00    4.00
  11   8   0   -0.50    3.70
  11   8   0    3.80    2.30
  11   8   0    7.10    2.00
  11   8   0    5.30    2.30
  11   8   0    4.50    2.80
 -12  -8   0   65.39    4.60
 -12  -8   0   59.39    4.90
 -12  -8   0   66.49    8.80
 -12  -8   0   54.99    4.20
 -12  -8   0   60.89    5.00
 -12  -8   0   56.09    5.00
 -12  -8   0   59.29    4.50
 -12  -8   0   59.39    7.80
 -12  -8   0   51.29    4.90
  12   8   0   54.19    6.70
  12   8   0   52.69    4.60
  12   8   0   58.39    4.90
  12   8   0   61.99    5.20
  12   8   0   53.79    4.60
 -13  -8   0   25.60    3.90
 -13  -8   0   33.90    4.20
 -13  -8   0   33.60    3.80
 -13  -8   0   32.90    4.20
 -13  -8   0   30.30    4.80
 -13  -8   0   31.20    4.10
 -13  -8   0   32.90    6.50
 -13  -8   0   29.50    7.80
 -13  -8   0   32.40    4.30
  13   8   0   24.70    4.00
  13   8   0   36.50    4.30
  13   8   0   33.60    4.30
  13   8   0   26.00    5.20
  13   8   0   29.20    3.90
  13   8   0   32.40    5.10
 -14  -8   0   32.50    4.20
 -14  -8   0   36.50    8.40
 -14  -8   0   33.10    4.20
 -14  -8   0   34.00    4.20
 -14  -8   0   28.90    4.10
 -14  -8   0   32.60    4.20
 -14  -8   0   32.50    4.90
 -14  -8   0   43.90    4.70
 -14  -8   0   30.60    7.50
  14   8   0   39.80    4.70
  14   8   0   30.40    5.00
  14   8   0   39.00    5.40
  14   8   0   32.50    4.10
  14   8   0   32.30    5.50
  14   8   0   36.40    4.10
  15  -9   0    4.70    4.40
 -15   9   0    0.00    0.90
 -15   9   0   -0.50    1.60
 -15   9   0   -1.80    3.30
 -15   9   0   -0.70    1.10
 -15   9   0    0.60    1.10
 -15   9   0    1.80    1.80
 -15   9   0    2.50    4.30
  14  -9   0   -3.30    3.50
 -14   9   0    2.70    4.00
 -14   9   0    7.60    4.20
 -14   9   0    0.50    1.50
 -14   9   0   -2.00    2.90
 -14   9   0    0.90    1.40
 -14   9   0    7.40    4.40
 -14   9   0   -0.30    2.20
  13  -9   0    6.40    4.10
 -13   9   0    8.80    2.20
 -13   9   0    7.90    4.20
 -13   9   0   16.80    4.80
 -13   9   0    5.20    1.90
 -13   9   0   12.80    4.10
  12  -9   0   -2.10    3.00
 -12   9   0    3.50    1.40
 -12   9   0    5.80    4.30
 -12   9   0    0.70    1.60
 -12   9   0   -0.30    1.50
 -12   9   0   -1.40    2.60
 -12   9   0    6.20    3.40
 -12   9   0    2.50    3.50
  11  -9   0   36.00    4.90
  11  -9   0   32.20    2.60
 -11   9   0   37.30    6.70
 -11   9   0   29.60    2.40
 -11   9   0   30.20    2.50
 -11   9   0   38.80    5.00
 -11   9   0   31.10    4.70
 -11   9   0   33.40    2.60
 -11   9   0   33.50    5.50
 -11   9   0   31.70    2.60
  10  -9   0   20.00    3.50
  10  -9   0   19.80    2.30
 -10   9   0   20.50    2.20
 -10   9   0   21.90    4.60
 -10   9   0   14.30    3.60
 -10   9   0   16.90    3.80
 -10   9   0   12.60    4.30
 -10   9   0   18.60    2.00
 -10   9   0   18.10    2.20
   9  -9   0    0.50    2.30
   9  -9   0    4.40    1.80
  -9   9   0    3.30    2.50
  -9   9   0   -3.50    2.50
  -9   9   0    2.00    1.60
  -9   9   0    4.10    1.30
  -9   9   0    1.40    3.00
  -9   9   0    2.40    1.30
  -9   9   0    2.10    2.80
   8  -9   0   59.59    3.60
   8  -9   0   56.59    4.40
  -8   9   0   62.49    2.90
  -8   9   0   59.29    4.80
  -8   9   0   64.79    6.30
  -8   9   0   62.69    6.00
  -8   9   0   56.69    3.70
  -8   9   0   59.09    4.80
  -8   9   0   67.39    4.50
   7  -9   0    9.40    2.00
   7  -9   0    8.20    2.40
   7  -9   0    5.50    0.60
   7  -9   0    5.60    0.60
  -7   9   0    6.30    1.30
  -7   9   0    5.60    3.30
  -7   9   0    7.00    1.40
  -7   9   0    3.80    2.60
  -7   9   0   10.70    2.80
  -7   9   0    3.80    3.20
  -7   9   0    7.20    1.70
   6  -9   0  253.77    8.40
   6  -9   0  240.28    6.00
   6  -9   0  245.68    6.00
   6  -9   0  265.97    8.20
  -6   9   0  262.07    6.90
  -6   9   0  266.87    9.10
  -6   9   0  257.27   10.60
  -6   9   0  265.07    8.90
  -6   9   0  257.87    6.90
  -6   9   0  239.68    7.50
   5  -9   0   12.90    1.10
   5  -9   0   14.50    2.10
   5  -9   0   11.80    2.20
   5  -9   0   11.90    2.40
   5  -9   0   11.40    1.00
  -5   9   0   13.20    1.80
  -5   9   0   12.00    1.90
  -5   9   0   14.10    3.40
  -5   9   0   13.40    1.40
  -5   9   0   10.60    3.40
  -5   9   0   12.60    2.60
  -5   9   0    9.70    2.40
   4  -9   0    4.20    1.50
   4  -9   0    3.10    0.70
   4  -9   0    4.60    1.90
   4  -9   0    4.80    1.70
   4  -9   0    5.00    2.60
   4  -9   0    3.70    0.80
  -4   9   0    3.40    1.50
  -4   9   0    4.90    2.80
  -4   9   0    3.60    1.10
  -4   9   0    5.30    2.00
  -4   9   0    7.80    2.70
   3  -9   0    7.10    1.90
   3  -9   0    6.60    1.10
   3  -9   0    9.00    2.00
   3  -9   0    8.30    1.80
   3  -9   0    5.60    1.20
   3  -9   0    4.80    1.00
   3  -9   0    6.40    1.50
  -3   9   0    5.80    1.20
  -3   9   0    8.30    2.90
  -3   9   0    6.30    1.70
  -3   9   0    8.50    1.70
  -3   9   0    5.40    2.20
  -3   9   0    5.60    2.70
  -3   9   0    6.90    1.20
   2  -9   0   49.40    2.30
   2  -9   0   48.20    3.40
   2  -9   0   45.60    2.80
   2  -9   0   48.60    2.30
   2  -9   0   45.00    2.10
   2  -9   0   47.70    3.00
   2  -9   0   49.30    3.10
  -2   9   0   48.50    2.50
  -2   9   0   47.60    2.40
  -2   9   0   44.80    2.70
  -2   9   0   50.19    3.20
  -2   9   0   44.80    5.00
  -2   9   0   50.59    3.30
   1  -9   0   54.99    3.50
   1  -9   0   55.09    4.90
   1  -9   0   54.09    2.60
   1  -9   0   56.49    3.60
   1  -9   0   53.09    2.60
   1  -9   0   51.89    2.00
   1  -9   0   51.99    3.30
   1  -9   0   58.69    2.50
  -1   9   0   51.59    1.80
  -1   9   0   55.19    2.80
  -1   9   0   55.39    4.90
  -1   9   0   54.09    3.30
  -1   9   0   46.50    1.90
  -1   9   0   55.49    2.60
  -1   9   0   51.09    5.30
  -1   9   0   54.49    3.30
  -1   9   0   59.59    2.70
   0  -9   0  123.69    4.30
   0  -9   0  111.99    3.90
   0  -9   0  121.59    4.10
   0  -9   0  122.99    6.50
   0  -9   0  124.79    5.40
   0  -9   0  124.59    4.50
   0  -9   0  125.49    5.10
   0   9   0  120.99    6.90
   0   9   0  122.79    5.10
   0   9   0  120.59    4.30
   0   9   0  128.59    4.90
   0   9   0  122.79    3.90
   0   9   0  117.49    6.50
   0   9   0  128.89    4.40
  -1  -9   0   36.80    3.50
  -1  -9   0   41.80    2.50
  -1  -9   0   41.20    3.40
  -1  -9   0   45.10    3.60
  -1  -9   0   43.60    1.90
  -1  -9   0   39.70    4.80
  -1  -9   0   38.90    2.60
   1   9   0   43.30    3.70
   1   9   0   39.50    2.60
   1   9   0   43.00    4.90
   1   9   0   40.80    2.10
   1   9   0   37.40    3.20
   1   9   0   40.60    5.40
   1   9   0   46.80    2.80
  -2  -9   0  521.25   14.50
  -2  -9   0  510.55   13.00
  -2  -9   0  518.45   14.00
  -2  -9   0  502.05   11.60
  -2  -9   0  509.45   15.30
  -2  -9   0  476.65   14.90
   2   9   0  486.55   15.10
   2   9   0  508.95   11.60
   2   9   0  513.95   15.70
   2   9   0  508.95   13.10
   2   9   0  521.75   13.90
   2   9   0  515.75   15.40
   2   9   0  525.65   13.10
  -3  -9   0  115.49    7.00
  -3  -9   0  101.89    6.30
  -3  -9   0  110.39    5.20
  -3  -9   0  111.89    4.50
  -3  -9   0  102.39    2.90
  -3  -9   0  108.69    3.00
  -3  -9   0  109.89    5.20
  -3  -9   0  108.89    5.70
  -3  -9   0  107.49    4.60
  -3  -9   0  104.79    3.10
   3   9   0  107.29    5.10
   3   9   0  105.79    6.20
   3   9   0  110.79    4.60
   3   9   0  110.39    6.70
   3   9   0  106.69    7.30
   3   9   0  113.19    4.60
  -4  -9   0   47.90    2.30
  -4  -9   0   38.40    5.60
  -4  -9   0   43.80    1.80
  -4  -9   0   47.40    3.90
  -4  -9   0   48.10    2.10
  -4  -9   0   44.90    3.60
  -4  -9   0   51.99    4.90
  -4  -9   0   46.30    3.10
  -4  -9   0   49.50    3.10
  -4  -9   0   50.19    3.30
   4   9   0   44.90    3.10
   4   9   0   41.60    1.70
   4   9   0   49.90    3.60
   4   9   0   56.39    5.50
   4   9   0   49.50    3.30
   4   9   0   43.80    6.50
   4   9   0   44.20    3.10
  -5  -9   0   20.30    2.00
  -5  -9   0   24.30    4.20
  -5  -9   0   19.60    2.50
  -5  -9   0   27.80    3.90
  -5  -9   0   16.60    2.80
  -5  -9   0   21.60    2.50
  -5  -9   0   21.90    1.90
  -5  -9   0   26.80    2.90
  -5  -9   0   21.00    3.20
   5   9   0   19.40    2.20
   5   9   0   16.50    2.80
   5   9   0   19.50    4.00
   5   9   0   16.70    4.40
   5   9   0   18.10    1.60
   5   9   0   24.50    2.60
   5   9   0   25.20    2.70
  -6  -9   0  124.79    5.90
  -6  -9   0  126.49    7.40
  -6  -9   0  126.39    5.40
  -6  -9   0  126.09    4.40
  -6  -9   0  123.69    6.10
  -6  -9   0  132.39    8.50
  -6  -9   0  126.69    5.40
   6   9   0  139.09    9.00
   6   9   0  125.39    5.40
   6   9   0  127.69    7.90
   6   9   0  131.99    6.00
   6   9   0  122.49    4.30
   6   9   0  131.39    5.40
   6   9   0  130.59    5.00
  -7  -9   0   -1.60    1.50
  -7  -9   0    1.10    1.80
  -7  -9   0    0.80    1.80
  -7  -9   0   -1.60    2.20
  -7  -9   0    2.70    2.20
  -7  -9   0    2.00    3.90
  -7  -9   0    1.90    2.20
  -7  -9   0    0.40    3.10
  -7  -9   0   -0.80    2.20
   7   9   0    1.80    1.80
   7   9   0    0.30    1.20
   7   9   0    1.30    1.40
   7   9   0   -2.20    3.90
   7   9   0    2.10    2.20
   7   9   0    2.50    3.60
  -8  -9   0   31.80    4.20
  -8  -9   0   27.80    2.60
  -8  -9   0   30.50    2.90
  -8  -9   0   37.00    5.80
  -8  -9   0   27.70    3.30
  -8  -9   0   29.60    3.80
  -8  -9   0   36.90    4.20
  -8  -9   0   31.70    3.50
  -8  -9   0   31.10    3.80
  -8  -9   0   39.90    5.80
   8   9   0   29.90    5.60
   8   9   0   34.10    5.20
   8   9   0   34.10    2.90
   8   9   0   33.50    2.90
   8   9   0   28.30    3.30
   8   9   0   32.90    3.70
   8   9   0   32.60    3.50
  -9  -9   0   20.60    3.20
  -9  -9   0   21.80    2.90
  -9  -9   0   19.70    3.30
  -9  -9   0   19.00    4.50
  -9  -9   0   23.30    4.80
  -9  -9   0   24.00    3.80
  -9  -9   0   27.00    5.00
  -9  -9   0   22.70    3.80
  -9  -9   0   21.60    3.20
   9   9   0   19.60    4.70
   9   9   0   20.50    3.40
   9   9   0   21.80    2.80
   9   9   0   27.90    3.30
   9   9   0   26.00    3.00
   9   9   0   23.50    5.00
   9   9   0   24.70    3.10
 -10  -9   0   -1.70    2.20
 -10  -9   0    2.70    2.90
 -10  -9   0    0.40    3.80
 -10  -9   0    0.20    2.70
 -10  -9   0    0.60    4.10
 -10  -9   0    3.30    1.90
 -10  -9   0    4.50    2.60
 -10  -9   0   -0.90    2.50
 -10  -9   0    0.90    2.40
  10   9   0    0.10    2.20
  10   9   0    1.70    2.60
  10   9   0    0.30    2.20
  10   9   0    2.80    4.00
  10   9   0   -0.50    2.20
  10   9   0    5.00    4.70
 -11  -9   0   42.80    4.00
 -11  -9   0   45.80    7.50
 -11  -9   0   37.60    6.20
 -11  -9   0   33.70    4.40
 -11  -9   0   39.40    4.30
 -11  -9   0   37.90    3.50
 -11  -9   0   34.30    4.20
 -11  -9   0   41.40    4.80
 -11  -9   0   37.40    3.60
  11   9   0   37.80    4.10
  11   9   0   38.30    5.50
  11   9   0   38.80    6.20
  11   9   0   35.60    4.00
  11   9   0   36.70    4.30
  11   9   0   36.90    4.20
 -12  -9   0   -0.80    2.80
 -12  -9   0    4.30    3.10
 -12  -9   0    9.50    3.10
 -12  -9   0    4.20    2.90
 -12  -9   0    4.80    2.20
 -12  -9   0    7.60    5.90
 -12  -9   0    2.20    2.80
 -12  -9   0    1.60    2.70
  12   9   0    7.10    3.00
  12   9   0    6.80    2.20
  12   9   0    7.60    2.10
  12   9   0    4.10    3.70
  12   9   0    3.00    2.40
  12   9   0   11.00    4.40
 -13  -9   0   20.60    6.20
 -13  -9   0   16.70    3.80
 -13  -9   0   14.20    3.50
 -13  -9   0   15.80    3.80
 -13  -9   0   14.50    3.80
 -13  -9   0   12.30    4.10
 -13  -9   0   17.10    3.90
 -13  -9   0   17.20    3.80
 -13  -9   0   23.50    7.30
 -13  -9   0   21.50    3.50
  13   9   0   20.40    3.80
  13   9   0   22.10    5.10
  13   9   0   15.20    3.60
  13   9   0   16.50    4.60
  13   9   0   17.50    3.50
  13   9   0   25.70    3.90
 -14  -9   0   10.20    3.60
 -14  -9   0   10.00    5.60
 -14  -9   0    2.30    8.00
 -14  -9   0    7.30    3.40
 -14  -9   0   10.00    3.70
 -14  -9   0   12.10    2.70
 -14  -9   0    9.50    7.50
 -14  -9   0   17.50    3.80
 -14  -9   0    5.00    3.30
 -14  -9   0   17.20    3.50
  14   9   0   15.30    3.30
  14   9   0   15.40    4.10
  14   9   0   12.10    3.40
  14   9   0   10.00    4.40
  14   9   0    9.00    3.90
  14   9   0   10.50    3.40
  15 -10   0    1.20    3.90
 -15  10   0    2.10    1.20
 -15  10   0    2.00    1.80
 -15  10   0    5.00    3.80
 -15  10   0   -2.50    3.80
 -15  10   0    1.40    1.70
 -15  10   0    0.50    2.20
  14 -10   0   -1.00    3.50
 -14  10   0   -0.70    3.10
 -14  10   0    1.40    3.70
 -14  10   0    1.70    1.60
 -14  10   0   -2.10    1.60
  13 -10   0    1.40    3.40
 -13  10   0   -2.30    1.40
 -13  10   0    0.40    1.60
 -13  10   0    0.20    2.60
 -13  10   0   -1.10    1.60
 -13  10   0    9.00    3.90
 -13  10   0   -3.60    3.10
  12 -10   0    0.00    3.40
  12 -10   0    2.30    1.60
 -12  10   0   -1.00    4.20
 -12  10   0    0.60    1.50
 -12  10   0    0.20    1.50
 -12  10   0    2.40    2.80
 -12  10   0    4.50    3.50
 -12  10   0    1.00    1.60
  11 -10   0   -2.30    1.70
  11 -10   0   -4.50    2.70
 -11  10   0    0.10    3.40
 -11  10   0    2.10    3.20
 -11  10   0   -0.30    1.30
 -11  10   0   -1.00    3.80
 -11  10   0   -1.80    3.30
 -11  10   0    0.70    1.40
 -11  10   0   -0.10    1.80
 -11  10   0    0.40    1.70
  10 -10   0    7.30    1.90
  10 -10   0    7.80    3.00
 -10  10   0    2.10    3.70
 -10  10   0    5.70    1.30
 -10  10   0    5.30    1.90
 -10  10   0    8.10    1.60
 -10  10   0    8.80    3.30
 -10  10   0    6.50    1.80
 -10  10   0    2.90    3.10
 -10  10   0    7.70    4.30
   9 -10   0   -0.30    1.70
   9 -10   0   -0.20    2.20
  -9  10   0   -0.50    1.20
  -9  10   0   -0.50    2.60
  -9  10   0   -0.10    1.10
  -9  10   0   -2.70    3.30
  -9  10   0    0.20    1.60
  -9  10   0   -0.80    2.50
  -9  10   0   -1.60    1.10
  -9  10   0   -4.00    3.30
   8 -10   0    0.70    1.60
   8 -10   0    1.60    2.10
  -8  10   0   -2.30    3.20
  -8  10   0   -1.40    2.60
  -8  10   0    1.70    1.20
  -8  10   0    4.60    3.20
  -8  10   0    0.90    2.70
  -8  10   0   -0.20    1.60
  -8  10   0    0.70    1.20
   7 -10   0   -0.90    1.70
   7 -10   0   -0.20    1.90
  -7  10   0   -1.20    3.10
  -7  10   0    1.40    2.50
  -7  10   0    0.30    1.40
  -7  10   0   -3.60    3.10
  -7  10   0   -0.40    1.10
  -7  10   0   -2.80    2.40
  -7  10   0   -0.20    3.30
  -7  10   0    0.10    1.40
   6 -10   0   50.19    1.80
   6 -10   0   57.49    3.80
   6 -10   0   50.89    1.80
   6 -10   0   54.99    3.80
  -6  10   0   57.79    6.00
  -6  10   0   57.79    6.30
  -6  10   0   54.29    4.50
  -6  10   0   56.09    2.80
  -6  10   0   57.79    3.70
  -6  10   0   50.89    2.70
  -6  10   0   52.29    4.70
   5 -10   0   34.20    3.50
   5 -10   0   33.20    1.60
   5 -10   0   41.50    3.60
   5 -10   0   35.20    1.60
   5 -10   0   35.40    3.20
  -5  10   0   37.20    2.30
  -5  10   0   36.50    4.90
  -5  10   0   42.00    3.00
  -5  10   0   35.10    3.50
  -5  10   0   32.10    3.60
  -5  10   0   39.40    5.30
   4 -10   0   63.29    3.90
   4 -10   0   63.19    2.40
   4 -10   0   54.59    3.90
   4 -10   0   59.29    3.40
   4 -10   0   58.49    2.30
   4 -10   0   58.29    3.80
  -4  10   0   58.69    3.70
  -4  10   0   60.79    2.70
  -4  10   0   57.29    3.50
  -4  10   0   59.09    2.70
  -4  10   0   59.59    4.10
  -4  10   0   59.39    5.40
  -4  10   0   61.19    6.00
   3 -10   0   12.60    2.10
   3 -10   0   14.90    2.50
   3 -10   0   10.60    2.30
   3 -10   0   12.90    2.20
   3 -10   0   10.70    1.30
   3 -10   0   12.20    1.80
  -3  10   0   12.80    2.10
  -3  10   0   11.90    2.40
  -3  10   0   17.60    2.50
  -3  10   0   11.90    1.60
  -3  10   0   13.70    3.40
  -3  10   0   12.20    1.50
   2 -10   0   10.20    2.10
   2 -10   0   10.90    1.40
   2 -10   0    5.80    1.90
   2 -10   0    8.70    1.70
   2 -10   0   10.50    2.40
   2 -10   0    8.20    1.30
   2 -10   0    9.20    1.20
  -2  10   0    9.60    3.20
  -2  10   0    8.50    1.70
  -2  10   0    8.40    1.40
  -2  10   0    9.30    1.50
  -2  10   0    6.40    2.20
  -2  10   0    8.80    2.00
   1 -10   0  198.98    6.50
   1 -10   0  198.68    7.40
   1 -10   0  187.58    5.00
   1 -10   0  198.18    6.70
   1 -10   0  199.68    7.00
   1 -10   0  201.08    8.70
   1 -10   0  209.98    5.90
   1 -10   0  191.68    5.80
  -1  10   0  189.18    4.70
  -1  10   0  214.28    8.90
  -1  10   0  183.48    4.70
  -1  10   0  209.08    9.10
  -1  10   0  199.28    6.00
  -1  10   0  199.38    6.00
  -1  10   0  168.08    4.90
  -1  10   0  204.48    6.70
  -1  10   0  199.18    6.00
  -1  10   0  213.38    7.10
   0 -10   0   -1.30    1.70
   0 -10   0    1.90    1.30
   0 -10   0   -0.60    1.90
   0 -10   0   -3.60    1.80
   0 -10   0    0.30    2.00
   0 -10   0   -1.00    2.50
   0  10   0    4.20    1.30
   0  10   0    3.60    1.40
   0  10   0    2.30    1.30
   0  10   0   -1.40    2.70
   0  10   0    4.10    3.20
   0  10   0   12.80    2.60
  -1 -10   0  516.25   14.30
  -1 -10   0  519.95   16.00
  -1 -10   0  506.55   13.20
  -1 -10   0  537.95   15.00
  -1 -10   0  528.15   13.40
  -1 -10   0  516.35   13.20
  -1 -10   0  514.35   12.20
   1  10   0  544.45   13.50
   1  10   0  530.75   14.40
   1  10   0  537.15   16.30
   1  10   0  526.25   13.60
   1  10   0  525.65   16.40
   1  10   0  532.95   13.50
   1  10   0  521.15   12.30
  -2 -10   0  261.97   10.40
  -2 -10   0  247.38    6.20
  -2 -10   0  256.77    7.60
  -2 -10   0  242.98    8.60
  -2 -10   0  270.17    9.30
  -2 -10   0  257.47    7.70
   2  10   0  255.47    8.60
   2  10   0  259.97   10.30
   2  10   0  262.67    7.90
   2  10   0  247.28    6.20
   2  10   0  255.17   10.80
   2  10   0  261.87    7.80
   2  10   0  244.18    7.70
  -3 -10   0   57.89    4.50
  -3 -10   0   54.49    2.00
  -3 -10   0   60.19    4.10
  -3 -10   0   51.79    5.90
  -3 -10   0   53.69    3.40
  -3 -10   0   56.59    3.30
  -3 -10   0   53.69    3.40
  -3 -10   0   59.09    5.50
   3  10   0   59.79    6.80
   3  10   0   52.59    5.80
   3  10   0   53.99    4.10
   3  10   0   54.39    3.40
   3  10   0   58.49    3.50
   3  10   0   57.49    3.70
  -4 -10   0   26.50    1.70
  -4 -10   0   28.30    3.70
  -4 -10   0   24.90    2.50
  -4 -10   0   25.20    3.10
  -4 -10   0   30.90    4.20
  -4 -10   0   27.60    4.40
  -4 -10   0   24.60    2.70
  -4 -10   0   28.80    1.60
  -4 -10   0   29.00    2.70
   4  10   0   25.70    2.60
   4  10   0   26.60    2.80
   4  10   0   24.10    2.70
   4  10   0   26.10    5.10
   4  10   0   25.10    2.70
   4  10   0   27.20    4.40
  -5 -10   0   13.20    1.90
  -5 -10   0   18.20    4.00
  -5 -10   0   14.20    2.30
  -5 -10   0   17.40    1.80
  -5 -10   0   12.90    2.90
  -5 -10   0   14.60    2.70
  -5 -10   0   16.90    1.80
  -5 -10   0   17.80    3.60
  -5 -10   0   19.30    3.00
   5  10   0   17.60    2.40
   5  10   0   10.20    3.40
   5  10   0   14.30    2.80
   5  10   0   15.30    2.00
   5  10   0   13.70    1.30
   5  10   0   18.20    2.40
   5  10   0   16.20    4.70
  -6 -10   0   -3.30    3.50
  -6 -10   0    0.00    2.20
  -6 -10   0   -4.50    1.50
  -6 -10   0    2.80    2.40
  -6 -10   0    0.70    2.10
  -6 -10   0    0.10    1.90
  -6 -10   0   -0.20    3.20
  -6 -10   0    1.10    1.80
  -6 -10   0    2.40    1.70
   6  10   0    1.40    1.40
   6  10   0    1.50    1.30
   6  10   0    3.30    4.40
   6  10   0    0.00    1.90
   6  10   0    3.10    1.10
   6  10   0    1.10    3.60
   6  10   0    1.40    2.10
  -7 -10   0   70.49    4.30
  -7 -10   0   73.19    6.50
  -7 -10   0   74.39    4.50
  -7 -10   0   65.79    8.30
  -7 -10   0   65.89    4.60
  -7 -10   0   69.99    4.40
  -7 -10   0   68.79    5.10
  -7 -10   0   67.49    3.80
   7  10   0   67.09    3.30
   7  10   0   72.09    4.40
   7  10   0   62.49    7.30
   7  10   0   72.69    3.90
   7  10   0   75.49    4.40
   7  10   0   76.59    4.50
   7  10   0   67.29    8.30
  -8 -10   0   22.20    3.60
  -8 -10   0   20.90    2.50
  -8 -10   0   22.00    3.80
  -8 -10   0   24.30    3.30
  -8 -10   0   29.10    5.70
  -8 -10   0   19.60    4.60
  -8 -10   0   23.60    3.60
  -8 -10   0   18.20    3.10
  -8 -10   0   19.60    3.10
  -8 -10   0   17.30    2.40
   8  10   0   24.80    2.90
   8  10   0   24.90    2.70
   8  10   0   21.10    3.30
   8  10   0   12.30    5.50
   8  10   0   14.70    5.10
   8  10   0   18.40    2.40
   8  10   0   18.20    3.40
  -9 -10   0  188.78    8.30
  -9 -10   0  195.28    8.00
  -9 -10   0  197.78    8.70
  -9 -10   0  191.48    7.80
  -9 -10   0  190.58   10.20
  -9 -10   0  194.78    7.60
  -9 -10   0  180.08    7.60
  -9 -10   0  194.28   12.00
  -9 -10   0  188.18    6.70
  -9 -10   0  199.58    7.90
   9  10   0  187.98   11.40
   9  10   0  191.88   10.70
   9  10   0  185.48    7.10
   9  10   0  195.78    7.90
   9  10   0  184.88    8.20
   9  10   0  184.68    6.80
   9  10   0  188.18    7.80
 -10 -10   0   94.89   10.40
 -10 -10   0   82.29    5.50
 -10 -10   0   76.39    4.30
 -10 -10   0   95.79    5.60
 -10 -10   0   81.79    6.00
 -10 -10   0   68.59    5.20
 -10 -10   0   78.59    7.90
 -10 -10   0   73.99    5.50
 -10 -10   0   86.39    5.50
 -10 -10   0   76.19    4.40
  10  10   0   81.89    5.70
  10  10   0   78.09    5.50
  10  10   0   92.39    8.80
  10  10   0   74.59    8.20
  10  10   0   81.79    5.40
  10  10   0   76.89    4.40
 -11 -10   0   -1.70    2.80
 -11 -10   0   -4.40    5.30
 -11 -10   0   -4.90    2.40
 -11 -10   0   -0.20    3.40
 -11 -10   0    0.00    2.60
 -11 -10   0   -0.40    2.50
 -11 -10   0   -0.50    4.40
 -11 -10   0   -0.20    3.20
 -11 -10   0   -1.60    1.80
  11  10   0   -0.80    1.80
  11  10   0   -2.60    4.60
  11  10   0   -1.70    2.50
  11  10   0   -2.70    2.50
  11  10   0   -1.70    2.10
  11  10   0   -0.60    4.00
 -12 -10   0    7.70    3.30
 -12 -10   0    5.00    2.60
 -12 -10   0    7.60    6.30
 -12 -10   0    7.90    2.70
 -12 -10   0    5.80    4.00
 -12 -10   0    9.70    3.50
 -12 -10   0    0.30   10.00
 -12 -10   0   16.20    3.60
 -12 -10   0   10.30    4.00
 -12 -10   0    8.90    3.90
  12  10   0   12.60    3.40
  12  10   0    6.10    2.90
  12  10   0    4.80    5.00
  12  10   0   10.00    2.70
  12  10   0    7.90    4.30
  12  10   0   10.50    3.00
 -13 -10   0   80.29    6.70
 -13 -10   0   82.49    6.80
 -13 -10   0   83.19    7.20
 -13 -10   0   77.99    6.20
 -13 -10   0   86.59    8.90
 -13 -10   0   75.29    5.90
 -13 -10   0   85.39    5.70
 -13 -10   0   92.49   12.10
 -13 -10   0   75.49    6.10
 -13 -10   0   77.89    5.20
  13  10   0   79.59    7.60
  13  10   0   67.99    8.40
  13  10   0   81.19    6.10
  13  10   0   73.09    5.30
  13  10   0   85.19    9.10
  13  10   0   84.09    5.90
 -14 -10   0    4.40    2.50
 -14 -10   0    4.90    3.10
 -14 -10   0    8.90    3.00
 -14 -10   0    1.20    3.10
 -14 -10   0    1.40    4.00
 -14 -10   0    4.40    2.50
 -14 -10   0    1.80    3.20
 -14 -10   0    7.30    6.90
 -14 -10   0    3.80    6.50
  14  10   0    0.80    3.90
  14  10   0   -4.50    4.50
  14  10   0    5.50    3.10
  14  10   0   11.20    3.40
  14  10   0    2.40    3.40
  14  10   0    3.50    2.60
 -15  11   0    1.90    4.10
 -15  11   0    3.30    4.00
  14 -11   0    9.00    3.80
 -14  11   0    5.00    1.80
 -14  11   0    4.30    1.70
 -14  11   0    5.20    3.70
 -14  11   0    5.50    3.70
  13 -11   0   -0.90    3.30
 -13  11   0    7.30    3.60
 -13  11   0   -0.20    3.80
 -13  11   0    0.20    1.50
 -13  11   0    4.00    1.70
 -13  11   0    2.70    1.60
  12 -11   0    5.50    2.20
  12 -11   0    1.70    3.50
 -12  11   0    3.40    3.50
 -12  11   0    0.50    1.80
 -12  11   0    3.90    1.60
 -12  11   0    4.40    1.70
 -12  11   0    2.80    1.70
 -12  11   0    3.30    3.40
 -12  11   0    6.80    4.50
  11 -11   0    4.20    3.00
  11 -11   0   -1.10    1.80
 -11  11   0   -1.20    3.10
 -11  11   0   -1.10    1.50
 -11  11   0    0.20    1.30
 -11  11   0    0.90    3.20
 -11  11   0   -0.50    1.50
 -11  11   0    3.70    4.10
 -11  11   0   -1.90    1.60
  10 -11   0   27.40    3.10
  10 -11   0   33.80    4.50
 -10  11   0   24.50    2.40
 -10  11   0   28.00    5.40
 -10  11   0   30.10    2.50
 -10  11   0   30.80    2.90
 -10  11   0   36.00    4.70
 -10  11   0   25.20    5.50
 -10  11   0   26.60    2.40
   9 -11   0   20.70    2.70
   9 -11   0   16.80    3.40
  -9  11   0   18.60    2.10
  -9  11   0   18.70    3.80
  -9  11   0   21.40    2.30
  -9  11   0   15.50    3.70
  -9  11   0   17.40    4.90
  -9  11   0   15.50    1.90
  -9  11   0   21.60    4.30
   8 -11   0   21.50    3.20
   8 -11   0   24.90    3.10
  -8  11   0   27.40    2.60
  -8  11   0   19.70    2.20
  -8  11   0   23.00    2.30
  -8  11   0   24.20    3.90
  -8  11   0   25.00    4.80
  -8  11   0   21.60    3.90
  -8  11   0   27.40    5.10
  -8  11   0   27.50    5.60
   7 -11   0   59.69    4.00
   7 -11   0   61.49    4.30
  -7  11   0   54.09    4.90
  -7  11   0   55.89    2.90
  -7  11   0   55.09    6.20
  -7  11   0   59.19    4.70
  -7  11   0   59.39    3.00
  -7  11   0   62.59    3.90
  -7  11   0   53.69    6.70
   6 -11   0    5.00    0.70
   6 -11   0    5.20    2.60
   6 -11   0    4.00    0.70
   6 -11   0    3.80    2.30
  -6  11   0    2.90    1.30
  -6  11   0    3.10    2.70
  -6  11   0    4.30    1.90
  -6  11   0    3.80    2.50
  -6  11   0    6.70    3.40
  -6  11   0    4.30    3.80
   5 -11   0   74.09    4.50
   5 -11   0   82.49    4.70
   5 -11   0   69.69    2.40
   5 -11   0   65.89    3.70
   5 -11   0   69.39    2.50
   5 -11   0   67.69    3.90
  -5  11   0   64.69    6.30
  -5  11   0   60.69    3.00
  -5  11   0   67.89    4.70
  -5  11   0   74.69    4.50
  -5  11   0   74.79    3.30
  -5  11   0   65.99    6.70
  -5  11   0   72.19    4.00
   4 -11   0    6.00    1.10
   4 -11   0    6.80    1.80
   4 -11   0    5.20    2.20
   4 -11   0    4.70    2.20
   4 -11   0    4.80    1.10
   4 -11   0    9.00    2.00
  -4  11   0    2.80    2.40
  -4  11   0    8.20    3.40
  -4  11   0    7.50    2.00
  -4  11   0    4.90    1.40
  -4  11   0    7.60    2.10
  -4  11   0    5.40    3.60
  -4  11   0    6.60    1.50
   3 -11   0   20.50    2.60
   3 -11   0   21.10    2.70
   3 -11   0   19.20    1.60
   3 -11   0   18.70    1.90
   3 -11   0   21.70    3.00
   3 -11   0   21.60    1.70
  -3  11   0   15.80    3.80
  -3  11   0   23.30    3.00
  -3  11   0   22.40    3.00
  -3  11   0   25.10    2.80
  -3  11   0   17.20    1.90
  -3  11   0   20.90    1.90
   2 -11   0   82.19    3.70
   2 -11   0   74.79    4.20
   2 -11   0   83.69    4.80
   2 -11   0   81.39    3.30
   2 -11   0   76.49    4.30
   2 -11   0   78.89    3.20
   2 -11   0   76.79    2.90
  -2  11   0   79.89    3.60
  -2  11   0   81.39    3.50
  -2  11   0   90.89    4.50
  -2  11   0   75.89    6.70
  -2  11   0   84.89    3.80
  -2  11   0   80.79    4.50
  -2  11   0   71.89    6.30
   1 -11   0    2.00    2.20
   1 -11   0   -1.30    1.50
   1 -11   0    0.10    1.00
   1 -11   0   -0.30    1.00
   1 -11   0    0.60    3.20
   1 -11   0   -0.90    0.70
   1 -11   0   -3.00    1.60
   1 -11   0   -3.30    1.30
  -1  11   0    0.90    2.90
  -1  11   0    2.70    1.60
  -1  11   0   -0.30    3.20
  -1  11   0    1.30    2.00
  -1  11   0    0.00    0.70
  -1  11   0   -0.60    1.40
  -1  11   0   -2.70    1.20
  -1  11   0    2.00    2.00
   0 -11   0  243.68    7.50
   0 -11   0  243.78    7.10
   0 -11   0  230.38    9.40
   0 -11   0  225.98    6.50
   0 -11   0  234.48    8.20
   0 -11   0  240.68    8.80
   0  11   0  245.38    8.30
   0  11   0  230.98   10.50
   0  11   0  234.18    7.30
   0  11   0  229.68    7.90
   0  11   0  228.98    6.60
   0  11   0  254.27    7.40
   0  11   0  230.78   10.20
  -1 -11   0   38.30    3.80
  -1 -11   0   28.00    3.20
  -1 -11   0   31.50    3.50
  -1 -11   0   33.90    4.70
  -1 -11   0   31.10    2.60
  -1 -11   0   31.30    1.80
  -1 -11   0   30.40    2.50
   1  11   0   31.80    2.80
   1  11   0   31.30    4.80
   1  11   0   30.20    3.10
   1  11   0   31.30    3.50
   1  11   0   32.40    2.80
   1  11   0   31.80    4.50
   1  11   0   34.70    2.20
  -2 -11   0   58.29    4.40
  -2 -11   0   66.79    3.60
  -2 -11   0   68.19    4.80
  -2 -11   0   63.89    6.20
  -2 -11   0   60.99    3.50
  -2 -11   0   60.89    2.20
   2  11   0   68.49    7.10
   2  11   0   61.59    6.20
   2  11   0   62.59    4.40
   2  11   0   61.19    3.70
   2  11   0   60.59    2.20
   2  11   0   65.89    3.90
   2  11   0   65.09    3.70
  -3 -11   0  136.99    5.40
  -3 -11   0  147.59    8.40
  -3 -11   0  140.39    6.30
  -3 -11   0  133.09    7.60
  -3 -11   0  131.29    3.60
  -3 -11   0  137.59    6.70
   3  11   0  136.99    5.60
   3  11   0  135.79    8.30
   3  11   0  141.59    6.00
   3  11   0  142.69    5.70
   3  11   0  130.79    9.00
   3  11   0  138.89    5.50
  -4 -11   0    0.00    1.70
  -4 -11   0    1.10    3.40
  -4 -11   0   -2.50    1.40
  -4 -11   0    1.30    0.80
  -4 -11   0    0.10    0.80
  -4 -11   0   -2.60    1.90
  -4 -11   0    1.80    0.60
  -4 -11   0   -5.50    2.80
  -4 -11   0   -1.50    2.30
   4  11   0   -0.40    1.60
   4  11   0   -2.90    3.30
   4  11   0   -0.20    2.00
   4  11   0   -1.50    2.00
   4  11   0    1.60    1.80
   4  11   0    6.70    4.40
  -5 -11   0   -0.20    2.10
  -5 -11   0    5.20    2.70
  -5 -11   0    0.10    1.70
  -5 -11   0    2.30    1.30
  -5 -11   0    0.00    3.60
  -5 -11   0    2.60    1.10
  -5 -11   0    2.10    1.80
  -5 -11   0    2.70    1.80
  -5 -11   0    2.70    0.90
  -5 -11   0    6.00    3.70
   5  11   0   -1.70    3.70
   5  11   0    0.80    1.70
   5  11   0    0.60    1.50
   5  11   0   -0.40    1.70
   5  11   0   -0.80    4.30
   5  11   0   -0.20    2.20
  -6 -11   0    9.50    1.90
  -6 -11   0    4.20    3.50
  -6 -11   0    7.00    2.60
  -6 -11   0    2.70    2.30
  -6 -11   0    7.50    2.20
  -6 -11   0    9.20    3.10
  -6 -11   0    7.40    2.20
  -6 -11   0    6.50    3.20
   6  11   0    9.90    2.40
   6  11   0    8.30    2.20
   6  11   0    7.80    5.00
   6  11   0    7.50    2.20
   6  11   0   10.10    5.10
   6  11   0    7.50    1.10
   6  11   0    9.00    2.80
  -7 -11   0   -2.70    2.60
  -7 -11   0   -2.00    4.20
  -7 -11   0   -1.30    2.50
  -7 -11   0    0.60    1.60
  -7 -11   0   -0.30    2.00
  -7 -11   0    0.30    2.10
  -7 -11   0   -1.00    3.60
  -7 -11   0   -1.40    1.20
  -7 -11   0    0.50    1.50
  -7 -11   0   -1.00    2.20
   7  11   0   -2.30    1.90
   7  11   0   -0.20    1.00
   7  11   0   -3.20    4.00
   7  11   0    0.10    1.80
   7  11   0   -1.30    4.60
   7  11   0   -2.00    1.80
   7  11   0    1.00    1.50
  -8 -11   0   65.79    5.60
  -8 -11   0   70.59    7.30
  -8 -11   0   75.19    5.30
  -8 -11   0   73.19    9.10
  -8 -11   0   72.59    5.00
  -8 -11   0   69.69    4.20
  -8 -11   0   76.89    5.00
  -8 -11   0   72.19    3.50
  -8 -11   0   75.49    3.90
  -8 -11   0   72.09    5.30
   8  11   0   73.99    9.30
   8  11   0   62.69    5.30
   8  11   0   66.89    4.80
   8  11   0   83.99    9.00
   8  11   0   61.49    3.40
   8  11   0   73.49    4.90
   8  11   0   74.39    4.10
  -9 -11   0    8.40    3.30
  -9 -11   0    9.00    4.70
  -9 -11   0   13.20    3.30
  -9 -11   0   11.10    5.70
  -9 -11   0   10.80    2.40
  -9 -11   0    5.70    2.10
  -9 -11   0   11.60    3.30
  -9 -11   0    8.40    3.80
  -9 -11   0   11.90    3.20
  -9 -11   0    9.80    3.60
   9  11   0    6.20    2.20
   9  11   0   11.20    2.50
   9  11   0    9.30    5.40
   9  11   0    6.70    5.00
   9  11   0    8.20    2.90
   9  11   0   13.80    3.30
   9  11   0    8.10    3.50
 -10 -11   0   56.09    5.20
 -10 -11   0   53.79    4.80
 -10 -11   0   53.19    4.00
 -10 -11   0   53.19    4.20
 -10 -11   0   45.60    3.60
 -10 -11   0   66.49    8.50
 -10 -11   0   60.89    5.70
 -10 -11   0   68.59    7.70
 -10 -11   0   58.59    5.10
 -10 -11   0   58.59    5.50
  10  11   0   49.99    4.90
  10  11   0   59.19    5.00
  10  11   0   53.89    5.40
  10  11   0   45.30    3.60
  10  11   0   44.70    6.90
  10  11   0   40.30    6.40
  10  11   0   55.79    4.30
 -11 -11   0   -1.20    2.90
 -11 -11   0   -1.50    5.40
 -11 -11   0    0.10    5.70
 -11 -11   0   -5.30    2.80
 -11 -11   0   -0.80    2.10
 -11 -11   0   -4.90    3.30
 -11 -11   0    0.50    3.60
 -11 -11   0    0.70    2.70
 -11 -11   0   -5.10    2.60
 -11 -11   0    2.00    2.20
  11  11   0    2.10    4.30
  11  11   0    3.20    2.20
  11  11   0    1.20    4.10
  11  11   0   -0.20    2.70
  11  11   0   -1.50    2.20
  11  11   0   -2.80    2.00
 -12 -11   0   27.20    4.20
 -12 -11   0   33.10    3.50
 -12 -11   0   34.00    6.50
 -12 -11   0   27.20    4.90
 -12 -11   0   34.60    4.50
 -12 -11   0   34.50    4.30
 -12 -11   0   38.70    4.70
 -12 -11   0   35.40    7.60
 -12 -11   0   34.30    4.60
 -12 -11   0   32.70    4.10
  12  11   0   36.00    4.60
  12  11   0   32.50    3.80
  12  11   0   41.60    7.90
  12  11   0   29.00    5.60
  12  11   0   38.90    4.30
  12  11   0   35.20    5.90
 -13 -11   0    5.90    3.30
 -13 -11   0   -2.20    3.20
 -13 -11   0   -3.70    5.00
 -13 -11   0   -1.20    3.20
 -13 -11   0    2.80    3.10
 -13 -11   0   -6.20    6.20
 -13 -11   0    1.30    2.80
 -13 -11   0    3.20    2.80
 -13 -11   0    1.50    3.00
 -13 -11   0   -0.20    3.20
  13  11   0    4.50    4.30
  13  11   0   -3.10    2.40
  13  11   0   -0.60    4.00
  13  11   0    4.00    3.20
  13  11   0   -3.30    2.80
  13  11   0   -6.80    2.60
 -14 -11   0   15.70    4.60
 -14 -11   0   14.90    3.60
 -14 -11   0   20.70    3.70
 -14 -11   0   20.90    5.20
 -14 -11   0   10.90    3.60
 -14 -11   0   17.40    3.50
 -14 -11   0   23.60    3.90
 -14 -11   0   13.10    6.90
 -14 -11   0   27.70    6.50
  14  11   0   13.80    3.10
  14  11   0   16.80    3.20
  14  11   0   16.90    5.00
  14  11   0   13.40    4.80
  14  11   0   16.00    3.50
  14  11   0   21.00    3.60
  15 -12   0    8.00    4.20
 -15  12   0   -3.00    3.40
 -15  12   0    2.90    1.80
 -15  12   0   -0.30    1.60
 -15  12   0    6.00    4.10
  14 -12   0    0.10    3.70
 -14  12   0   -1.10    3.40
 -14  12   0    8.00    3.80
  13 -12   0   -3.50    3.80
  13 -12   0    1.70    2.10
 -13  12   0    0.30    1.50
 -13  12   0    2.30    3.40
 -13  12   0    0.30    1.40
 -13  12   0    0.70    1.40
 -13  12   0   -0.10    1.40
 -13  12   0    5.40    3.70
  12 -12   0    0.30    2.00
 -12  12   0   -1.70    3.60
 -12  12   0    4.20    1.70
 -12  12   0    7.60    3.80
 -12  12   0    4.00    1.80
 -12  12   0    3.40    2.00
 -12  12   0    3.90    1.60
  11 -12   0   -1.00    2.20
  11 -12   0   -0.80    2.90
 -11  12   0   -1.30    1.90
 -11  12   0    5.60    4.20
 -11  12   0   -1.90    3.20
 -11  12   0   -1.70    1.70
 -11  12   0    1.00    2.10
 -11  12   0   -0.40    3.10
 -11  12   0    0.40    1.40
  10 -12   0    7.20    2.60
  10 -12   0    9.00    3.30
 -10  12   0    8.70    1.80
 -10  12   0   12.60    2.30
 -10  12   0   10.20    4.80
 -10  12   0    9.80    1.80
 -10  12   0   12.10    3.80
 -10  12   0    9.90    2.40
 -10  12   0   11.80    3.80
   9 -12   0    9.20    3.00
   9 -12   0    6.70    2.50
  -9  12   0    9.60    3.60
  -9  12   0   14.30    3.70
  -9  12   0    6.40    1.70
  -9  12   0    8.50    4.50
  -9  12   0   -2.40    4.00
  -9  12   0    5.60    4.40
  -9  12   0    8.60    1.70
  -9  12   0   10.90    2.40
   8 -12   0    6.90    2.70
   8 -12   0    5.70    2.70
  -8  12   0    4.30    3.10
  -8  12   0    6.40    1.60
  -8  12   0    3.80    1.60
  -8  12   0    2.60    2.30
  -8  12   0    6.30    4.20
  -8  12   0    3.30    2.90
  -8  12   0    6.50    4.20
  -8  12   0    7.20    4.10
   7 -12   0    0.90    2.50
   7 -12   0   -1.40    2.40
  -7  12   0    0.50    3.20
  -7  12   0    4.30    6.20
  -7  12   0    2.20    4.00
  -7  12   0    0.20    1.80
  -7  12   0   -2.60    2.60
  -7  12   0   -0.70    1.00
   6 -12   0    2.10    0.60
   6 -12   0    3.00    0.70
   6 -12   0    3.10    2.70
   6 -12   0    0.50    2.20
  -6  12   0    3.80    3.50
  -6  12   0    2.80    2.20
  -6  12   0   -1.50    2.50
  -6  12   0    2.20    3.70
  -6  12   0    2.40    1.10
  -6  12   0    2.40    1.10
  -6  12   0   -1.20    2.80
   5 -12   0   -0.60    1.70
   5 -12   0    0.50    2.00
   5 -12   0    0.50    0.90
   5 -12   0   -2.80    1.90
   5 -12   0    1.30    0.80
   5 -12   0   -0.20    2.10
  -5  12   0    0.50    2.00
  -5  12   0    1.20    1.80
  -5  12   0   -0.90    2.30
  -5  12   0   -1.90    3.70
  -5  12   0    0.50    1.10
  -5  12   0   -4.60    2.90
  -5  12   0    0.00    1.30
   4 -12   0    0.10    1.40
   4 -12   0   -3.00    1.80
   4 -12   0   -0.20    2.00
   4 -12   0   -0.70    1.00
   4 -12   0   -0.90    1.70
   4 -12   0    1.40    1.00
  -4  12   0   -1.20    3.20
  -4  12   0    1.50    2.30
  -4  12   0    1.20    1.90
  -4  12   0    1.60    3.10
  -4  12   0    0.90    2.10
  -4  12   0    0.10    1.00
   3 -12   0   51.59    2.70
   3 -12   0   50.69    2.50
   3 -12   0   56.89    3.80
   3 -12   0   55.09    4.30
   3 -12   0   51.69    2.50
   3 -12   0   54.09    3.70
  -3  12   0   57.89    6.60
  -3  12   0   52.69    3.80
  -3  12   0   55.19    4.20
  -3  12   0   49.30    3.10
  -3  12   0   51.39    2.90
   2 -12   0   24.50    3.00
   2 -12   0   24.00    3.40
   2 -12   0   20.30    2.00
   2 -12   0   22.30    2.90
   2 -12   0   23.70    1.70
  -2  12   0   22.80    1.50
  -2  12   0   25.60    3.10
  -2  12   0   24.00    2.30
  -2  12   0   26.00    3.00
  -2  12   0   21.40    4.60
  -2  12   0   22.10    4.40
  -2  12   0   23.10    3.20
  -2  12   0   24.30    2.20
   1 -12   0  132.59    4.80
   1 -12   0  127.09    6.50
   1 -12   0  130.29    5.90
   1 -12   0  123.09    4.50
   1 -12   0  126.89    8.00
   1 -12   0  134.19    5.60
  -1  12   0  130.29    8.20
  -1  12   0  131.79    6.00
  -1  12   0  130.79    6.10
  -1  12   0  134.99    5.20
  -1  12   0  125.99    8.50
  -1  12   0  132.39    4.90
  -1  12   0  132.39    5.00
   0 -12   0   52.99    4.20
   0 -12   0   63.59    3.40
   0 -12   0   53.59    3.30
   0 -12   0   54.89    3.80
   0 -12   0   51.79    6.20
   0 -12   0   56.59    4.70
   0 -12   0   56.39    2.80
   0  12   0   52.99    4.30
   0  12   0   54.79    2.90
   0  12   0   54.79    3.30
   0  12   0   55.19    4.50
   0  12   0   46.80    6.40
   0  12   0   60.09    7.30
   0  12   0   55.69    3.40
  -1 -12   0  247.68    9.10
  -1 -12   0  251.07    8.00
  -1 -12   0  254.47    7.70
  -1 -12   0  240.98    6.60
  -1 -12   0  250.77   10.90
  -1 -12   0  261.87    9.80
  -1 -12   0  259.17    7.80
   1  12   0  257.07    8.00
   1  12   0  239.88   10.70
   1  12   0  247.58    9.00
   1  12   0  254.67   11.20
   1  12   0  243.38    6.70
   1  12   0  268.57    8.10
   1  12   0  262.17    8.60
  -2 -12   0  126.09    6.70
  -2 -12   0  125.29    5.10
  -2 -12   0  134.99    5.30
  -2 -12   0  120.69    5.00
  -2 -12   0  120.09    3.50
  -2 -12   0  118.29    8.10
  -2 -12   0  126.79    6.30
   2  12   0  128.89    9.30
   2  12   0  123.29    5.30
   2  12   0  134.39    6.30
   2  12   0  132.59    5.40
   2  12   0  117.79    3.50
   2  12   0  131.39    5.80
   2  12   0  135.99    8.40
  -3 -12   0   39.90    5.40
  -3 -12   0   37.30    3.90
  -3 -12   0   34.00    3.10
  -3 -12   0   31.00    1.30
  -3 -12   0   33.30    2.80
  -3 -12   0   35.50    4.20
   3  12   0   30.00    5.00
   3  12   0   28.90    2.70
   3  12   0   40.70    3.50
   3  12   0   38.40    4.00
   3  12   0   31.80    5.50
   3  12   0   32.90    3.20
  -4 -12   0    4.20    2.10
  -4 -12   0   -0.50    3.70
  -4 -12   0    0.30    2.50
  -4 -12   0    1.60    1.90
  -4 -12   0    3.20    2.00
  -4 -12   0   -1.10    2.20
   4  12   0    6.90    2.50
   4  12   0    4.30    2.00
   4  12   0    3.80    4.00
   4  12   0    4.00    2.60
   4  12   0   -0.10    4.60
   4  12   0    6.30    2.10
  -5 -12   0  120.89    5.50
  -5 -12   0  124.59    6.30
  -5 -12   0  120.59    5.30
  -5 -12   0  125.99    5.60
  -5 -12   0  120.89    8.70
  -5 -12   0  113.49    3.30
  -5 -12   0  113.19    3.70
  -5 -12   0  116.89    7.90
  -5 -12   0  124.89    7.00
   5  12   0  116.09    5.60
   5  12   0  121.69    5.60
   5  12   0  121.19    5.30
   5  12   0  127.89    6.50
   5  12   0  115.49    8.70
   5  12   0  122.09   10.00
  -6 -12   0    3.40    2.50
  -6 -12   0    4.10    3.00
  -6 -12   0    4.80    1.80
  -6 -12   0    4.00    1.00
  -6 -12   0    4.70    1.40
  -6 -12   0    4.70    4.30
  -6 -12   0   -0.10    2.00
  -6 -12   0    3.20    2.20
  -6 -12   0    5.00    2.70
  -6 -12   0    5.20    3.70
   6  12   0    4.90    2.10
   6  12   0    3.70    2.30
   6  12   0    7.50    2.90
   6  12   0   -1.40    5.00
   6  12   0    5.70    2.20
   6  12   0    3.30    0.90
   6  12   0    9.20    4.60
  -7 -12   0   84.49    5.30
  -7 -12   0   97.69    5.40
  -7 -12   0   88.09    5.80
  -7 -12   0  102.59    8.00
  -7 -12   0   99.39    5.20
  -7 -12   0  100.19    7.80
  -7 -12   0   96.79    6.40
  -7 -12   0  108.69    5.60
  -7 -12   0  101.89    3.50
  -7 -12   0   96.29    5.00
   7  12   0   87.39    3.50
   7  12   0   95.39    8.70
   7  12   0   97.99    6.10
   7  12   0   94.69    5.30
   7  12   0   98.49    5.60
   7  12   0   92.79    4.50
   7  12   0   88.69   10.00
  -8 -12   0   -3.80    4.00
  -8 -12   0    3.00    2.00
  -8 -12   0    2.80    2.30
  -8 -12   0    3.40    2.50
  -8 -12   0    8.80    3.20
  -8 -12   0    1.00    3.30
  -8 -12   0   -3.30    4.80
  -8 -12   0    6.60    2.80
  -8 -12   0    1.90    1.50
   8  12   0    3.60    2.60
   8  12   0    2.60    5.30
   8  12   0    5.00    4.60
   8  12   0    0.30    2.30
   8  12   0    3.10    2.20
   8  12   0    6.10    3.10
  -9 -12   0  133.49    6.90
  -9 -12   0  151.58    7.80
  -9 -12   0  144.59    7.00
  -9 -12   0  133.89    5.40
  -9 -12   0  137.39    6.00
  -9 -12   0  149.09   11.10
  -9 -12   0  138.89    5.10
  -9 -12   0  143.99   11.50
  -9 -12   0  161.58   13.30
   9  12   0  113.49    5.00
   9  12   0  151.48    7.10
   9  12   0  129.79    6.00
   9  12   0  134.49    7.40
   9  12   0  135.49    6.50
   9  12   0  134.69   10.80
   9  12   0  123.09   10.10
 -10 -12   0    0.70    4.20
 -10 -12   0    0.70    5.60
 -10 -12   0    5.50    3.50
 -10 -12   0    6.60    5.00
 -10 -12   0   -1.30    3.10
 -10 -12   0    0.90    2.10
 -10 -12   0    2.80    3.20
 -10 -12   0    0.50    3.00
 -10 -12   0    3.10    3.00
  10  12   0   10.90    4.80
  10  12   0    1.60    4.70
  10  12   0    6.30    2.60
  10  12   0    0.30    3.30
  10  12   0   -0.50    1.90
  10  12   0    5.10    2.80
  10  12   0    2.20    2.10
 -11 -12   0   58.49    5.30
 -11 -12   0   48.00    4.00
 -11 -12   0   46.80    7.20
 -11 -12   0   48.80    4.40
 -11 -12   0   53.29    5.40
 -11 -12   0   55.39    5.70
 -11 -12   0   55.89    5.60
 -11 -12   0   48.80    4.90
 -11 -12   0   57.69    8.20
 -11 -12   0   50.69    3.80
  11  12   0   42.70    6.40
  11  12   0   49.30    4.10
  11  12   0   61.29    8.70
  11  12   0   51.89    4.40
  11  12   0   44.50    5.10
  11  12   0   49.20    4.90
 -12 -12   0   22.70    7.50
 -12 -12   0   28.50    4.40
 -12 -12   0   28.90    4.50
 -12 -12   0   21.10    4.30
 -12 -12   0   21.40    6.00
 -12 -12   0   20.80    3.10
 -12 -12   0   29.00    4.70
 -12 -12   0   27.40    3.40
 -12 -12   0   19.10    3.30
  12  12   0   25.30    4.10
  12  12   0   25.60    5.50
  12  12   0   32.00    4.20
  12  12   0   25.90    3.50
  12  12   0   26.80    5.80
  12  12   0   23.30    4.00
 -13 -12   0   21.10    7.70
 -13 -12   0   24.60    7.40
 -13 -12   0   19.70    3.80
 -13 -12   0   20.90    4.60
 -13 -12   0   22.40    3.30
 -13 -12   0   22.90    4.60
 -13 -12   0   19.30    4.10
 -13 -12   0   23.80    4.70
 -13 -12   0   23.60    3.50
 -13 -12   0   26.70    4.60
  13  12   0   20.60    3.50
  13  12   0   14.30    4.80
  13  12   0   21.10    4.00
  13  12   0   19.00    3.40
  13  12   0   23.00    4.30
  13  12   0   14.00    5.20
 -14 -12   0    9.40    7.40
 -14 -12   0    6.20    4.20
 -14 -12   0    4.70    3.40
 -14 -12   0    9.80    3.40
 -14 -12   0   11.60    3.30
 -14 -12   0   -1.70    3.30
 -14 -12   0    6.00    3.40
 -14 -12   0    9.10    5.80
 -14 -12   0   11.30    3.00
 -14 -12   0    4.50    3.10
  14  12   0    8.40    5.50
  14  12   0    4.40    3.40
  14  12   0    3.10    2.40
  14  12   0    3.00    4.40
  14  12   0    5.20    3.30
  14  12   0    8.50    3.20
  14 -13   0    2.90    3.80
 -14  13   0   -1.70    1.60
 -14  13   0   10.40    4.00
 -14  13   0    0.50    3.70
 -14  13   0    0.10    1.50
 -14  13   0    0.80    1.50
 -14  13   0    0.40    1.50
  13 -13   0    3.80    2.00
  13 -13   0    0.50    3.40
 -13  13   0    4.70    1.80
 -13  13   0    1.50    1.50
 -13  13   0    3.50    3.80
 -13  13   0    7.50    2.00
 -13  13   0    3.30    2.70
 -13  13   0    1.80    1.40
  12 -13   0   14.20    5.00
  12 -13   0    9.30    2.80
 -12  13   0   16.50    4.20
 -12  13   0   17.60    5.40
 -12  13   0   11.00    2.20
 -12  13   0   13.00    2.20
 -12  13   0   13.60    2.50
 -12  13   0    9.20    1.90
  11 -13   0   26.30    4.40
  11 -13   0   20.40    3.40
 -11  13   0   20.00    4.60
 -11  13   0   21.40    2.50
 -11  13   0   26.30    3.20
 -11  13   0   25.50    4.70
 -11  13   0   24.10    3.00
 -11  13   0   22.90    2.60
 -11  13   0   22.60    4.60
  10 -13   0    0.00    3.00
  10 -13   0    7.50    2.80
 -10  13   0   10.20    1.80
 -10  13   0    4.70    3.40
 -10  13   0   11.10    4.80
 -10  13   0    6.80    2.40
 -10  13   0    6.30    3.70
 -10  13   0    6.40    1.80
 -10  13   0   11.30    4.70
 -10  13   0    0.20    4.50
   9 -13   0   23.70    3.70
   9 -13   0   21.60    3.60
  -9  13   0   18.30    4.60
  -9  13   0   22.70    2.90
  -9  13   0   19.60    7.80
  -9  13   0   24.00    5.30
  -9  13   0   30.70    5.90
  -9  13   0   21.10    2.30
  -9  13   0   19.40    2.20
  -9  13   0   18.30    5.40
   8 -13   0   16.90    3.10
   8 -13   0   17.10    3.10
  -8  13   0   17.40    2.50
  -8  13   0   15.20    3.70
  -8  13   0   16.60    4.90
  -8  13   0   20.00    2.80
  -8  13   0   22.20    3.90
  -8  13   0   16.40    5.80
  -8  13   0   23.50    5.40
   7 -13   0    3.70    2.40
   7 -13   0    3.40    2.90
  -7  13   0    0.20    2.50
  -7  13   0    5.30    1.60
  -7  13   0    3.20    1.40
  -7  13   0    6.80    4.00
  -7  13   0    3.40    3.50
  -7  13   0    3.80    2.50
   6 -13   0    2.40    0.70
   6 -13   0    6.80    2.50
   6 -13   0    4.70    2.20
   6 -13   0    3.60    0.60
  -6  13   0    4.40    1.50
  -6  13   0    4.60    4.00
  -6  13   0    0.70    3.60
  -6  13   0    2.40    1.50
  -6  13   0    2.30    2.70
  -6  13   0    7.90    2.60
  -6  13   0    9.20    2.30
   5 -13   0   17.10    3.00
   5 -13   0   12.90    3.10
   5 -13   0   11.50    1.30
   5 -13   0   16.30    2.80
   5 -13   0   16.30    2.30
   5 -13   0   12.30    1.40
  -5  13   0   17.70    5.40
  -5  13   0   10.30    4.20
  -5  13   0   13.30    1.80
  -5  13   0   16.40    3.20
  -5  13   0   17.60    3.50
  -5  13   0   18.50    3.80
  -5  13   0   15.50    2.70
   4 -13   0   21.10    2.30
   4 -13   0   19.20    3.40
   4 -13   0   22.40    2.90
   4 -13   0   22.90    3.20
   4 -13   0   19.80    1.80
   4 -13   0   17.00    1.60
  -4  13   0   20.20    2.30
  -4  13   0   23.90    3.30
  -4  13   0   21.30    3.10
  -4  13   0   22.20    4.00
  -4  13   0   18.80    5.90
  -4  13   0   23.30    2.20
  -4  13   0   16.30    4.60
   3 -13   0   65.69    4.70
   3 -13   0   60.29    4.30
   3 -13   0   55.09    3.00
   3 -13   0   64.29    5.00
   3 -13   0   58.49    2.90
   3 -13   0   60.69    2.90
  -3  13   0   61.79    7.00
  -3  13   0   61.39    4.20
  -3  13   0   65.09    7.60
  -3  13   0   58.69    2.80
  -3  13   0   58.59    3.50
  -3  13   0   67.19    4.50
  -3  13   0   58.09    3.30
  -3  13   0   61.59    4.70
   2 -13   0    5.70    2.50
   2 -13   0    3.30    2.30
   2 -13   0    0.40    2.60
   2 -13   0    4.10    1.30
   2 -13   0    5.40    1.20
   2 -13   0    3.10    1.20
  -2  13   0    3.40    3.90
  -2  13   0    9.40    2.00
  -2  13   0    4.40    0.90
  -2  13   0    5.50    3.90
  -2  13   0    7.90    2.00
  -2  13   0    6.10    2.30
  -2  13   0    4.40    2.50
  -2  13   0    2.00    3.20
  -2  13   0    6.40    0.90
   1 -13   0   45.50    3.00
   1 -13   0   40.50    4.50
   1 -13   0   36.20    3.30
   1 -13   0   42.10    6.10
   1 -13   0   45.40    3.50
   1 -13   0   45.50    2.70
  -1  13   0   40.70    4.10
  -1  13   0   39.30    5.60
  -1  13   0   43.30    6.30
  -1  13   0   48.00    3.20
  -1  13   0   47.90    4.20
  -1  13   0   47.50    3.50
  -1  13   0   47.50    3.10
   0 -13   0   22.30    4.60
   0 -13   0   17.80    2.30
   0 -13   0   19.70    2.40
   0 -13   0   20.90    3.80
   0 -13   0   20.70    3.20
   0 -13   0   22.70    2.90
   0  13   0   20.20    2.30
   0  13   0   19.10    2.40
   0  13   0   19.20    2.40
   0  13   0   20.60    4.20
   0  13   0   14.40    4.40
   0  13   0   27.90    3.80
   0  13   0   20.90    2.90
  -1 -13   0   63.89    3.80
  -1 -13   0   65.69    4.80
  -1 -13   0   68.59    7.00
  -1 -13   0   66.19    3.70
  -1 -13   0   64.19    5.30
   1  13   0   75.79    5.10
   1  13   0   64.19    8.10
   1  13   0   66.89    4.00
   1  13   0   70.89    3.00
   1  13   0   73.69    7.20
   1  13   0   69.39    5.00
   1  13   0   69.69    4.00
  -2 -13   0   11.20    2.20
  -2 -13   0    7.50    2.30
  -2 -13   0   13.70    3.10
  -2 -13   0   10.70    4.20
  -2 -13   0   15.50    3.60
  -2 -13   0    9.20    2.20
   2  13   0   14.60    4.50
   2  13   0    8.60    3.20
   2  13   0    9.40    1.10
   2  13   0   11.00    2.40
   2  13   0    8.80    4.80
   2  13   0   14.00    2.70
   2  13   0    9.90    3.00
  -3 -13   0    9.60    2.30
  -3 -13   0    7.90    2.10
  -3 -13   0    6.10    2.70
  -3 -13   0    7.20    4.20
  -3 -13   0    6.30    3.00
   3  13   0   10.50    3.00
   3  13   0    5.50    2.10
   3  13   0    7.00    2.10
   3  13   0    8.30    2.90
   3  13   0    6.10    4.90
   3  13   0   10.20    4.40
  -4 -13   0   42.30    3.60
  -4 -13   0   44.60    4.50
  -4 -13   0   39.70    3.60
  -4 -13   0   39.30    3.40
  -4 -13   0   46.70    6.00
  -4 -13   0   45.50    4.90
   4  13   0   46.80    3.80
   4  13   0   45.60    3.80
   4  13   0   43.00    6.00
   4  13   0   46.70    4.00
   4  13   0   41.00    6.60
   4  13   0   42.10    4.50
  -5 -13   0   -2.10    1.90
  -5 -13   0    0.00    2.20
  -5 -13   0   -3.20    2.50
  -5 -13   0   -4.30    1.90
  -5 -13   0   -1.60    3.80
   5  13   0    1.40    2.10
   5  13   0    2.50    2.10
   5  13   0   -2.20    1.60
   5  13   0   -5.60    2.60
   5  13   0   -4.50    4.90
   5  13   0    7.00    4.50
  -6 -13   0   70.99    2.20
  -6 -13   0   76.39    4.60
  -6 -13   0   70.29    5.50
  -6 -13   0   79.89    7.30
  -6 -13   0   71.39    3.10
  -6 -13   0   69.59    4.80
  -6 -13   0   68.09    6.10
  -6 -13   0   78.99    4.90
  -6 -13   0   62.99    6.80
  -6 -13   0   67.29    2.20
   6  13   0   77.29    4.90
   6  13   0   70.19    4.00
   6  13   0   67.49    7.80
   6  13   0   71.79    4.90
   6  13   0   80.69    8.60
   6  13   0   62.09    5.40
  -7 -13   0    1.40    1.60
  -7 -13   0   -3.10    2.30
  -7 -13   0    0.50    2.70
  -7 -13   0    3.20    2.60
  -7 -13   0   -1.00    1.00
  -7 -13   0   -5.50    3.10
   7  13   0    0.80    0.90
   7  13   0   -1.00    4.50
   7  13   0   -0.90    2.20
   7  13   0   -3.30    2.40
   7  13   0   -0.30    2.10
   7  13   0   -3.10    1.90
  -8 -13   0  152.18    4.80
  -8 -13   0  151.78   10.30
  -8 -13   0  144.99    6.70
  -8 -13   0  159.38    7.30
  -8 -13   0  149.39    8.50
  -8 -13   0  145.39    5.60
  -8 -13   0  152.78    5.50
  -8 -13   0  160.08    9.50
   8  13   0  141.49   11.70
   8  13   0  152.88   10.60
   8  13   0  146.09    6.30
   8  13   0  156.88    8.00
   8  13   0  150.38    7.20
   8  13   0  126.49    4.70
   8  13   0  151.28    6.80
  -9 -13   0   -0.80    2.20
  -9 -13   0   -0.30    3.00
  -9 -13   0    0.90    5.50
  -9 -13   0   -4.50    1.80
  -9 -13   0   -4.10    2.90
  -9 -13   0    0.30    1.80
  -9 -13   0   -5.20    3.40
  -9 -13   0   -1.90    4.20
   9  13   0   -0.40    3.50
   9  13   0   -2.20    2.40
   9  13   0   -1.90    2.20
   9  13   0   -4.60    4.40
   9  13   0   -1.90    5.00
   9  13   0   -2.10    2.60
   9  13   0   -1.00    1.40
 -10 -13   0   45.20    3.70
 -10 -13   0   57.29    8.30
 -10 -13   0   50.69    3.40
 -10 -13   0   55.19    5.10
 -10 -13   0   54.79    5.30
 -10 -13   0   47.00    7.00
 -10 -13   0   36.90    7.20
 -10 -13   0   53.99    5.50
 -10 -13   0   50.79    5.10
 -10 -13   0   53.79    4.60
  10  13   0   47.30    4.10
  10  13   0   54.29    5.10
  10  13   0   52.99    5.50
  10  13   0   45.70    3.60
  10  13   0   46.80    4.20
  10  13   0   49.00    7.00
  10  13   0   62.99    8.50
 -11 -13   0    5.10    2.50
 -11 -13   0    6.60    2.10
 -11 -13   0    2.40    4.00
 -11 -13   0    5.20    3.30
 -11 -13   0    1.20    5.80
 -11 -13   0    8.70    3.20
 -11 -13   0    2.10    3.00
 -11 -13   0    1.80    6.00
 -11 -13   0    1.00    2.90
 -11 -13   0    2.70    2.50
  11  13   0    3.00    2.20
  11  13   0    6.70    5.70
  11  13   0    2.50    2.70
  11  13   0    5.70    2.80
  11  13   0    5.50    3.40
  11  13   0    4.00    4.90
 -12 -13   0   41.60    6.80
 -12 -13   0   25.60    4.00
 -12 -13   0   29.50    3.30
 -12 -13   0   32.50    3.60
 -12 -13   0   37.60    5.00
 -12 -13   0   35.50    5.20
 -12 -13   0   38.50    4.60
 -12 -13   0   30.50    4.60
 -12 -13   0   34.20    7.90
 -12 -13   0   37.10    4.60
  12  13   0   27.00    4.00
  12  13   0   38.20    4.60
  12  13   0   31.40    4.60
  12  13   0   26.10    6.30
  12  13   0   30.70    3.70
  12  13   0   26.10    6.50
 -13 -13   0    3.60    3.50
 -13 -13   0    7.60    3.50
 -13 -13   0   -2.60    3.40
 -13 -13   0    5.40    3.90
 -13 -13   0    1.40    3.00
 -13 -13   0    3.20    2.40
 -13 -13   0    1.80    2.20
 -13 -13   0    1.50    6.50
 -13 -13   0    2.50    5.30
 -13 -13   0    3.10    2.20
  13  13   0    3.60    2.40
  13  13   0   -0.20    2.30
  13  13   0    3.30    2.90
  13  13   0   -1.70    4.20
  13  13   0    2.10    2.50
  13  13   0    0.20    6.30
 -14 -13   0    0.40    3.30
 -14 -13   0   14.10    4.90
 -14 -13   0   12.40    5.60
 -14 -13   0    5.60    2.70
 -14 -13   0    1.50    4.00
 -14 -13   0    7.30    4.80
 -14 -13   0   -2.40    3.00
 -14 -13   0   -0.40    2.90
 -14 -13   0    2.90    7.30
 -14 -13   0    4.50    2.90
  14  13   0    4.70    4.30
  14  13   0   -3.10    3.00
  14  13   0    2.30    3.00
  14  13   0    5.70    2.30
  14  13   0   -1.90    3.00
  14  13   0    0.80    4.30
 -14  14   0    8.60    4.10
  13 -14   0    3.30    2.70
  13 -14   0   -0.30    3.50
 -13  14   0    5.20    3.50
 -13  14   0   -1.10    3.70
 -13  14   0   12.30    4.90
  12 -14   0   -1.30    2.40
  12 -14   0   -3.50    3.10
 -12  14   0    1.10    1.90
 -12  14   0    4.00    3.60
 -12  14   0    4.70    4.50
 -12  14   0    1.00    1.60
 -12  14   0    0.00    1.40
 -12  14   0    0.40    3.50
 -12  14   0   -0.10    1.80
  11 -14   0   -3.00    2.60
  11 -14   0   -5.30    2.80
 -11  14   0   -1.80    1.60
 -11  14   0    3.00    2.20
 -11  14   0   -2.00    1.90
 -11  14   0   -2.20    3.20
 -11  14   0    1.30    1.50
 -11  14   0    8.60    4.60
 -11  14   0    3.30    3.80
  10 -14   0    4.20    3.00
  10 -14   0    4.70    3.10
 -10  14   0    3.30    3.70
 -10  14   0    7.20    2.60
 -10  14   0   14.70    5.00
 -10  14   0   10.30    3.90
 -10  14   0    7.20    1.70
   9 -14   0   13.40    3.60
   9 -14   0    9.00    2.80
  -9  14   0    6.50    2.60
  -9  14   0   21.30    5.40
  -9  14   0    7.70    1.70
  -9  14   0    3.40    3.50
  -9  14   0    8.00    1.80
  -9  14   0    8.80    4.80
  -9  14   0    2.30    3.20
   8 -14   0    0.30    2.80
   8 -14   0   -0.70    2.60
  -8  14   0    0.50    1.50
  -8  14   0    3.00    3.50
  -8  14   0    2.60    4.10
  -8  14   0    2.00    3.90
  -8  14   0    3.20    2.40
  -8  14   0   -3.30    3.80
  -8  14   0    2.60    1.30
   7 -14   0    1.20    2.20
   7 -14   0    2.90    2.70
  -7  14   0   -1.00    3.10
  -7  14   0   -1.00    2.70
  -7  14   0   -1.70    1.40
  -7  14   0   -2.10    1.60
  -7  14   0   -5.00    3.60
  -7  14   0    0.70    2.50
  -7  14   0    0.30    4.10
   6 -14   0   26.60    1.20
   6 -14   0   34.90    3.40
   6 -14   0   28.30    1.20
   6 -14   0   30.10    4.00
  -6  14   0   32.30    4.00
  -6  14   0   30.40    4.20
  -6  14   0   29.60    3.40
  -6  14   0   28.20    2.80
  -6  14   0   33.30    5.70
  -6  14   0   31.10    2.90
  -6  14   0   33.80    6.00
   5 -14   0   -0.70    0.80
   5 -14   0    3.40    1.80
   5 -14   0    1.00    2.30
   5 -14   0    2.50    3.30
   5 -14   0    1.10    0.90
   5 -14   0    2.50    2.60
  -5  14   0    1.30    2.20
  -5  14   0    4.50    2.90
  -5  14   0    2.20    2.00
  -5  14   0   -3.50    7.20
  -5  14   0    7.00    3.00
  -5  14   0    2.80    1.80
  -5  14   0   -0.30    1.60
  -5  14   0    2.60    3.80
   4 -14   0   25.20    1.90
   4 -14   0   33.70    2.20
   4 -14   0   30.90    3.40
   4 -14   0   26.50    3.20
   4 -14   0   24.80    3.40
   4 -14   0   36.60    4.30
  -4  14   0   30.20    2.60
  -4  14   0   29.50    5.50
  -4  14   0   30.30    3.60
  -4  14   0   31.90    4.10
  -4  14   0   28.70    5.50
  -4  14   0   29.60    3.00
  -4  14   0   26.40    5.30
  -4  14   0   31.90    4.10
  -4  14   0   27.50    2.80
   3 -14   0   21.80    3.40
   3 -14   0   23.00    2.20
   3 -14   0   20.80    2.10
   3 -14   0   23.10    2.30
   3 -14   0   18.50    3.90
   3 -14   0   20.60    3.20
  -3  14   0   21.80    5.00
  -3  14   0   25.80    5.30
  -3  14   0   22.30    2.40
  -3  14   0   28.60    3.70
  -3  14   0   27.20    3.30
  -3  14   0   20.20    1.90
  -3  14   0   18.90    4.90
  -3  14   0   26.00    3.80
  -3  14   0   25.20    2.70
   2 -14   0   62.79    5.40
   2 -14   0   63.29    3.30
   2 -14   0   79.29    5.00
   2 -14   0   66.69    4.40
   2 -14   0   72.39    3.50
  -2  14   0   68.79    5.00
  -2  14   0   71.89    4.20
  -2  14   0   61.79    8.00
  -2  14   0   80.79    7.70
  -2  14   0   73.79    3.90
  -2  14   0   70.89    5.00
  -2  14   0   77.49    3.90
   1 -14   0   14.90    1.90
   1 -14   0   14.10    3.60
   1 -14   0   14.10    2.60
   1 -14   0   13.60    4.50
   1 -14   0   11.10    2.80
  -1  14   0   14.20    3.20
  -1  14   0    8.80    4.30
  -1  14   0   16.00    2.50
  -1  14   0   15.70    3.10
  -1  14   0   13.60    2.30
  -1  14   0   12.20    2.30
  -1  14   0   14.30    5.00
   0 -14   0   49.20    4.30
   0 -14   0   46.10    3.40
   0 -14   0   46.00    6.70
   0 -14   0   49.80    5.00
   0 -14   0   52.59    4.00
   0 -14   0   48.00    3.40
   0  14   0   43.00    3.40
   0  14   0   41.40    5.80
   0  14   0   45.00    6.20
   0  14   0   44.80    3.20
   0  14   0   43.70    3.70
   0  14   0   50.69    4.50
   0  14   0   53.09    5.00
  -1 -14   0   26.80    3.00
  -1 -14   0   27.50    4.50
  -1 -14   0   27.70    5.30
  -1 -14   0   27.60    3.80
  -1 -14   0   30.70    3.20
   1  14   0   25.10    2.10
   1  14   0   24.10    5.40
   1  14   0   25.40    5.20
   1  14   0   22.20    2.80
   1  14   0   29.40    3.10
   1  14   0   35.80    4.30
   1  14   0   31.70    3.90
  -2 -14   0   44.50    3.40
  -2 -14   0   37.20    3.20
  -2 -14   0   45.00    3.60
  -2 -14   0   39.60    4.90
  -2 -14   0   44.40    6.90
  -2 -14   0   39.50    4.40
   2  14   0   44.40    4.60
   2  14   0   38.20    4.40
   2  14   0   40.10    5.90
   2  14   0   39.10    6.30
   2  14   0   40.30    3.60
   2  14   0   40.90    3.60
   2  14   0   38.00    1.50
  -3 -14   0   53.89    3.90
  -3 -14   0   59.39    7.50
  -3 -14   0   57.09    3.90
  -3 -14   0   54.89    4.40
  -3 -14   0   57.19    3.90
  -3 -14   0   52.99    4.70
   3  14   0   55.09    4.20
   3  14   0   62.79    7.70
   3  14   0   61.19    4.80
   3  14   0   55.19    4.10
   3  14   0   57.39    5.10
   3  14   0   59.39    8.70
  -4 -14   0   14.10    3.50
  -4 -14   0   15.00    2.80
  -4 -14   0   13.40    2.70
  -4 -14   0   15.50    7.60
  -4 -14   0    7.00    4.80
   4  14   0   13.50    3.60
   4  14   0   17.20    5.80
   4  14   0   13.40    2.70
   4  14   0   16.60    3.20
   4  14   0   11.90    4.90
   4  14   0   18.40    2.90
  -5 -14   0   59.79    4.30
  -5 -14   0   51.19    8.00
  -5 -14   0   58.19    4.20
  -5 -14   0   55.69    7.10
  -5 -14   0   53.39    4.30
  -5 -14   0   56.39    5.70
   5  14   0   56.89    8.10
   5  14   0   72.79   14.30
   5  14   0   51.99    5.30
   5  14   0   59.59    4.30
   5  14   0   56.19    4.50
   5  14   0   59.49    4.50
  -6 -14   0   35.30    4.10
  -6 -14   0   49.20    7.00
  -6 -14   0   38.20    4.10
  -6 -14   0   39.40    3.50
  -6 -14   0   36.60    1.90
  -6 -14   0   45.80    5.70
  -6 -14   0   45.70    4.30
   6  14   0   49.20    4.40
   6  14   0   40.40    5.10
   6  14   0   33.90    7.00
   6  14   0   42.20    4.30
   6  14   0   44.20    3.80
   6  14   0   42.70    6.60
  -7 -14   0  108.39    4.30
  -7 -14   0  113.79    7.20
  -7 -14   0  123.69    6.40
  -7 -14   0  108.29   12.40
  -7 -14   0  119.49    5.80
  -7 -14   0  109.79    5.80
  -7 -14   0  120.79    9.30
   7  14   0  117.59    5.50
   7  14   0  109.19    6.40
   7  14   0  113.69    8.30
   7  14   0  117.89    6.40
   7  14   0  127.09   11.50
   7  14   0  122.29   11.40
  -8 -14   0   52.69    5.60
  -8 -14   0   72.59    9.30
  -8 -14   0   44.00    4.20
  -8 -14   0   46.70    4.50
  -8 -14   0   43.40    2.20
  -8 -14   0   56.99    5.10
  -8 -14   0   62.29    6.30
  -8 -14   0   51.99    4.30
  -8 -14   0   50.79    7.60
   8  14   0   45.70    7.50
   8  14   0   46.30    5.60
   8  14   0   51.49    4.90
   8  14   0   50.19    5.00
   8  14   0   48.80    7.00
   8  14   0   46.30    4.00
  -9 -14   0   24.10    2.20
  -9 -14   0   33.80    6.40
  -9 -14   0   25.60    3.90
  -9 -14   0   35.20    4.30
  -9 -14   0   27.80    4.10
  -9 -14   0   29.40    6.90
  -9 -14   0   35.00    4.90
  -9 -14   0   25.80    5.20
  -9 -14   0   24.60    3.30
   9  14   0   30.80    3.50
   9  14   0   35.00    4.30
   9  14   0   41.40    4.70
   9  14   0   33.00    4.80
   9  14   0   27.30    6.00
   9  14   0   30.50    6.70
 -10 -14   0   13.70    5.30
 -10 -14   0    7.70    4.40
 -10 -14   0   12.40    2.30
 -10 -14   0    8.70    3.10
 -10 -14   0   11.90    3.50
 -10 -14   0    4.70    6.20
 -10 -14   0   13.00    3.10
 -10 -14   0   11.80    3.60
 -10 -14   0   12.20    3.40
 -10 -14   0    9.90    2.00
  10  14   0    9.30    3.20
  10  14   0   11.70    3.40
  10  14   0   15.00    2.70
  10  14   0   10.90    5.50
  10  14   0   11.20    2.00
  10  14   0   12.80    4.00
  10  14   0    7.00    5.20
 -11 -14   0    8.70    5.10
 -11 -14   0   -1.00    3.70
 -11 -14   0    1.30    2.40
 -11 -14   0    5.50    3.30
 -11 -14   0    6.50    3.60
 -11 -14   0    5.50    2.80
 -11 -14   0    5.60    2.30
 -11 -14   0    0.30    5.60
  11  14   0    3.60    3.60
  11  14   0    0.20    4.70
  11  14   0    0.60    5.00
  11  14   0    2.40    1.80
  11  14   0    6.60    2.90
  11  14   0    3.40    2.80
 -12 -14   0    8.00    5.00
 -12 -14   0   -2.20    3.10
 -12 -14   0   -1.10    1.90
 -12 -14   0    2.10    2.40
 -12 -14   0    5.50    3.20
 -12 -14   0   -1.30    2.80
 -12 -14   0   -6.20    3.40
 -12 -14   0    4.90    3.40
 -12 -14   0   -0.50    2.60
  12  14   0   -1.40    2.50
  12  14   0    0.40    2.00
  12  14   0   -4.00    2.50
  12  14   0    0.30    3.00
  12  14   0   -2.40    4.30
  12  14   0   -1.00    4.40
 -13 -14   0    0.80    3.00
 -13 -14   0    1.30    3.90
 -13 -14   0    6.50    5.20
 -13 -14   0   -1.00    6.90
 -13 -14   0   10.70    3.60
 -13 -14   0    3.30    3.30
 -13 -14   0    5.10    2.60
 -13 -14   0    2.10    2.10
 -13 -14   0   -0.50    3.20
 -13 -14   0   -1.10    2.90
  13  14   0    1.50    4.70
  13  14   0   -2.30    3.10
  13  14   0    1.40    2.10
  13  14   0    4.40    4.60
  13  14   0    0.20    2.40
  13  14   0    9.90    3.40
 -14 -14   0   -1.10    3.20
 -14 -14   0    7.20    3.40
 -14 -14   0    5.60    3.40
 -14 -14   0    4.40    2.50
 -14 -14   0    0.70    3.60
 -14 -14   0    1.80    3.80
 -14 -14   0    5.60    3.00
 -14 -14   0   24.50    6.20
 -14 -14   0    4.40    7.70
 -14 -14   0    2.20    3.70
  14  14   0    2.70    2.90
  14  14   0    6.10    4.80
  14  14   0    6.70    2.80
  14  14   0   20.70    6.50
  14  14   0    1.20    2.40
  15 -15   0   -0.20    4.10
 -15  15   0    3.80    1.80
 -15  15   0    1.60    1.40
 -15  15   0    0.30    3.60
 -15  15   0    3.60    4.80
 -15  15   0   -1.60    1.40
  13 -15   0   -1.80    3.60
  13 -15   0    2.90    2.70
 -13  15   0    1.70    1.70
 -13  15   0    4.20    1.60
 -13  15   0   -1.10    1.60
 -13  15   0    5.50    4.00
 -13  15   0    2.80    2.00
 -13  15   0   -4.90    3.50
  12 -15   0    3.20    2.90
  12 -15   0    0.90    3.50
 -12  15   0    4.60    3.70
 -12  15   0   12.90    4.90
 -12  15   0    2.60    3.40
 -12  15   0    4.90    2.20
 -11  15   0    6.80    2.30
  10 -15   0   23.80    3.70
  10 -15   0   17.20    4.00
 -10  15   0   21.00    4.30
 -10  15   0   22.60    2.50
 -10  15   0   19.40    5.10
 -10  15   0   22.50    2.90
 -10  15   0   21.10    2.50
   9 -15   0    0.50    2.90
   9 -15   0   -2.90    2.80
  -9  15   0    0.50    2.40
  -9  15   0   -0.80    3.20
  -9  15   0   -0.40    4.40
  -9  15   0   -0.40    1.50
  -9  15   0   -1.90    2.80
  -9  15   0   -2.00    1.30
   8 -15   0    5.60    2.30
   8 -15   0    5.60    3.20
  -8  15   0    7.80    1.80
  -8  15   0    5.50    3.00
  -8  15   0    6.70    4.70
  -8  15   0    5.30    2.80
  -8  15   0   18.20    4.80
  -8  15   0    9.00    3.50
  -8  15   0    8.80    1.90
   7 -15   0    6.50    3.00
   7 -15   0    7.90    2.50
  -7  15   0    9.10    1.90
  -7  15   0    5.60    1.90
  -7  15   0    7.10    3.40
  -7  15   0    2.50    4.40
  -7  15   0    4.70    2.40
  -7  15   0    8.40    3.00
  -7  15   0    7.90    2.60
  -7  15   0    6.10    4.50
   6 -15   0    3.00    3.70
   6 -15   0    5.60    0.50
   6 -15   0    7.40    2.40
  -6  15   0    5.70    4.40
  -6  15   0   13.10    4.80
  -6  15   0    9.50    3.40
  -6  15   0   10.90    2.10
  -6  15   0    7.90    2.00
  -6  15   0   11.20    2.50
  -6  15   0   12.00    3.50
  -6  15   0    6.40    2.60
   5 -15   0   39.30    2.00
   5 -15   0   45.70    4.40
   5 -15   0   42.60    3.30
   5 -15   0   42.20    4.00
   5 -15   0   41.70    4.90
  -5  15   0   39.90    3.40
  -5  15   0   39.90    3.10
  -5  15   0   43.60    4.10
  -5  15   0   37.10    6.20
  -5  15   0   47.70    3.60
  -5  15   0   38.20    6.20
  -5  15   0   43.60    5.60
  -5  15   0   36.30    4.10
  -5  15   0   42.40    6.70
   4 -15   0   22.90    3.40
   4 -15   0   18.30    2.00
   4 -15   0   24.20    4.00
   4 -15   0   15.30    3.10
   4 -15   0   14.80    2.10
  -4  15   0   19.70    3.40
  -4  15   0   12.50    4.90
  -4  15   0   16.60    3.70
  -4  15   0   21.80    3.90
  -4  15   0   21.20    5.40
  -4  15   0   14.30    4.90
  -4  15   0   14.10    4.00
  -4  15   0   17.00    2.10
  -4  15   0   13.00    2.50
   3 -15   0   12.10    3.20
   3 -15   0   20.40    3.30
   3 -15   0   14.70    1.90
   3 -15   0   15.10    1.90
   3 -15   0   19.40    3.50
   3 -15   0   17.40    3.90
  -3  15   0   14.20    4.90
  -3  15   0   18.50    2.30
  -3  15   0   16.30    5.00
  -3  15   0   18.00    3.00
  -3  15   0   19.70    3.50
  -3  15   0   17.60    4.10
  -3  15   0   19.40    5.40
  -3  15   0   15.10    1.50
   2 -15   0    8.30    1.80
   2 -15   0    7.80    2.90
   2 -15   0   10.40    3.00
   2 -15   0    4.20    3.50
  -2  15   0    9.70    2.10
  -2  15   0    7.20    2.30
  -2  15   0    8.30    3.10
  -2  15   0    6.70    2.90
  -2  15   0    1.90    4.20
   1 -15   0   17.80    3.40
   1 -15   0   22.60    5.30
   1 -15   0   20.00    4.10
   1 -15   0   21.10    2.30
   1 -15   0   16.90    2.80
  -1  15   0   18.30    5.10
  -1  15   0   20.30    2.70
  -1  15   0   19.90    2.60
  -1  15   0   22.30    3.60
  -1  15   0   17.00    3.50
  -1  15   0   15.20    2.40
   0 -15   0    4.30    3.50
   0 -15   0    5.40    2.20
   0 -15   0    1.40    2.50
   0 -15   0   10.50    4.80
   0 -15   0    8.70    3.00
   0  15   0    5.10    1.90
   0  15   0    7.00    2.10
   0  15   0    7.00    3.50
   0  15   0    6.10    4.50
   0  15   0    8.80    2.20
   0  15   0    4.00    3.00
  -1 -15   0   41.90    3.50
  -1 -15   0   43.90    6.20
  -1 -15   0   36.10    3.70
  -1 -15   0   36.60    4.40
  -1 -15   0   26.20    5.00
   1  15   0   33.10    3.40
   1  15   0   31.50    2.10
   1  15   0   35.90    4.20
   1  15   0   36.00    3.40
   1  15   0   28.10    5.60
   1  15   0   29.00    3.70
  -2 -15   0    4.90    2.10
  -2 -15   0    3.80    3.00
  -2 -15   0    0.70    4.20
  -2 -15   0    3.00    3.40
  -2 -15   0    0.40    3.30
   2  15   0    2.40    2.90
   2  15   0   -0.40    3.10
   2  15   0    3.10    2.10
   2  15   0    3.00    2.10
   2  15   0    2.50    4.20
  -3 -15   0   -0.80    4.10
  -3 -15   0   -1.50    4.90
  -3 -15   0    0.60    3.20
  -3 -15   0   -4.50    3.10
  -3 -15   0    0.40    2.00
  -3 -15   0   -2.40    2.10
   3  15   0   -4.80    4.20
   3  15   0    2.00    2.20
   3  15   0    1.00    4.90
   3  15   0   -2.60    2.70
   3  15   0    0.40    2.00
   3  15   0    2.20    2.90
  -4 -15   0   84.49    4.80
  -4 -15   0   66.99   10.60
  -4 -15   0  100.09   11.20
  -4 -15   0   80.39    5.60
   4  15   0   93.89   10.30
   4  15   0   84.39    5.30
   4  15   0   95.79    7.00
   4  15   0   80.89    5.30
   4  15   0   90.89    5.30
   4  15   0   89.99    9.00
  -5 -15   0   35.90    3.90
  -5 -15   0   31.20    3.50
  -5 -15   0   38.30   11.70
  -5 -15   0   29.40    4.40
  -5 -15   0   32.00    6.30
   5  15   0   33.20    3.80
   5  15   0   29.70    6.10
   5  15   0   39.30    5.70
   5  15   0   41.80    4.30
   5  15   0   31.50    3.80
   5  15   0   32.60    7.10
  -6 -15   0   60.69    8.40
  -6 -15   0   48.70    5.40
  -6 -15   0   58.19    4.70
  -6 -15   0   53.59    4.20
  -6 -15   0   51.39    6.10
   6  15   0   57.09    4.10
   6  15   0   55.69    8.30
   6  15   0   55.59    4.90
   6  15   0   51.79    5.70
   6  15   0   61.09    4.90
   6  15   0   51.89    7.80
  -7 -15   0   24.20    6.00
  -7 -15   0   12.00    4.10
  -7 -15   0   18.90    3.50
  -7 -15   0   17.20    1.60
  -7 -15   0   21.60    3.40
  -7 -15   0   15.70    4.70
  -7 -15   0   21.20    3.80
   7  15   0   24.00    5.80
   7  15   0   12.40    6.10
   7  15   0   19.30    2.70
   7  15   0   16.40    3.00
   7  15   0   19.00    3.40
   7  15   0   14.40    4.00
  -8 -15   0   57.99    5.90
  -8 -15   0   54.09    6.40
  -8 -15   0   51.49    4.60
  -8 -15   0   56.69    7.60
  -8 -15   0   47.20    4.90
  -8 -15   0   54.49    5.00
  -8 -15   0   58.19    7.20
   8  15   0   53.19    5.10
   8  15   0   55.49    5.30
   8  15   0   44.70    5.60
   8  15   0   55.89    4.20
   8  15   0   57.39    8.90
   8  15   0   49.10    7.80
  -9 -15   0   29.30    3.30
  -9 -15   0   41.20    6.60
  -9 -15   0   24.40    5.10
  -9 -15   0   33.70    7.30
  -9 -15   0   41.90    4.80
  -9 -15   0   20.80    3.90
  -9 -15   0   33.20    4.20
  -9 -15   0   28.00    1.70
  -9 -15   0   26.70    4.00
   9  15   0   23.80    4.00
   9  15   0   25.70    6.50
   9  15   0   26.80    3.40
   9  15   0   28.50    6.40
   9  15   0   34.30    4.30
   9  15   0   26.50    4.50
 -10 -15   0    9.50    3.90
 -10 -15   0   16.70    5.40
 -10 -15   0   11.70    1.70
 -10 -15   0    6.90    4.40
 -10 -15   0   17.10    3.50
 -10 -15   0    9.50    3.50
 -10 -15   0   11.70    3.40
 -10 -15   0   13.40    3.00
  10  15   0   12.40    4.00
  10  15   0   17.70    6.90
  10  15   0    9.90    4.50
  10  15   0   17.40    2.80
  10  15   0   10.00    3.20
  10  15   0   14.00    3.30
 -11 -15   0   -1.70    1.90
 -11 -15   0    1.10    2.10
 -11 -15   0   -0.40    2.90
 -11 -15   0    0.30    1.60
 -11 -15   0    4.40    3.40
 -11 -15   0    4.60    3.90
 -11 -15   0   16.50    6.30
 -11 -15   0    1.70    3.10
 -11 -15   0    4.80    2.60
  11  15   0   -1.50    3.10
  11  15   0    4.60    4.70
  11  15   0    0.40    1.50
  11  15   0   -0.90    1.50
  11  15   0    0.00    4.90
  11  15   0   -1.70    2.60
 -12 -15   0    7.90    3.00
 -12 -15   0    1.40    2.50
 -12 -15   0    7.40    3.00
 -12 -15   0   11.40    5.00
 -12 -15   0    1.90    3.00
 -12 -15   0    1.50    2.20
 -12 -15   0    5.70    4.10
 -12 -15   0    6.50    3.40
  12  15   0    3.00    4.80
  12  15   0    5.00    5.10
  12  15   0    0.40    3.00
  12  15   0    6.10    3.60
  12  15   0    4.40    2.00
  12  15   0   -0.50    2.60
 -13 -15   0    2.90    2.60
 -13 -15   0    3.00    2.50
 -13 -15   0   -5.90    3.50
 -13 -15   0   -5.40    2.90
 -13 -15   0    1.40    3.80
 -13 -15   0   -2.10    3.80
 -13 -15   0   18.70    5.40
 -13 -15   0    2.50    2.10
  13  15   0    4.70    3.20
  13  15   0    0.00    3.40
  13  15   0    0.80    4.90
  13  15   0   -3.30    4.50
  13  15   0    2.70    2.80
 -14 -15   0   13.90    4.90
 -14 -15   0   20.80    4.60
 -14 -15   0   11.20    4.20
 -14 -15   0   21.00   11.00
 -14 -15   0   20.30    4.20
 -14 -15   0   20.00    3.20
 -14 -15   0   17.00    3.40
 -14 -15   0   20.90    4.70
  14  15   0   13.30    6.90
  14  15   0   14.10    2.90
  14  15   0   16.40    4.40
  14  15   0   12.60    5.60
  14  15   0   12.10    4.40
  14  15   0   24.40    4.60
  14 -16   0    4.00    2.40
  14 -16   0    2.20    4.50
 -14  16   0    1.80    4.00
 -14  16   0    0.80    1.50
 -14  16   0    2.20    1.70
 -14  16   0    4.30    2.20
 -14  16   0    2.40    3.80
  12 -16   0   -1.30    2.20
  12 -16   0    0.00    4.00
 -12  16   0    0.60    2.10
 -12  16   0   -1.90    1.50
 -12  16   0    0.50    1.70
 -12  16   0    1.20    3.80
 -12  16   0   -1.30    3.50
 -12  16   0    5.10    2.30
  11 -16   0   10.70    3.70
  11 -16   0   15.00    4.70
 -11  16   0   13.70    4.60
 -11  16   0    6.10    1.90
 -11  16   0    7.40    1.80
 -11  16   0    9.80    2.60
 -11  16   0   12.80    2.90
 -11  16   0    4.70    3.80
  10 -16   0    1.60    3.30
  10 -16   0   -0.80    3.20
 -10  16   0    5.60    4.80
 -10  16   0    5.10    2.70
 -10  16   0    2.40    1.80
 -10  16   0    1.80    3.10
 -10  16   0    1.30    3.30
 -10  16   0    2.90    1.50
   9 -16   0    2.70    2.60
   9 -16   0    0.90    3.20
  -9  16   0    2.40    1.70
  -9  16   0    1.20    3.30
  -9  16   0    3.10    3.00
  -9  16   0    2.40    2.30
  -9  16   0    5.90    1.80
  -9  16   0    5.20    3.30
   8 -16   0    1.00    2.60
   8 -16   0    1.60    2.60
  -8  16   0    3.10    2.60
  -8  16   0    2.30    2.30
  -8  16   0   -1.50    3.10
  -8  16   0   -2.20    1.30
  -8  16   0    1.80    1.70
  -8  16   0    1.30    3.40
   7 -16   0    1.50    2.30
   7 -16   0    0.70    3.80
  -7  16   0    0.20    2.30
  -7  16   0    1.40    2.20
  -7  16   0   -0.10    1.40
  -7  16   0   -1.00    3.30
  -7  16   0   11.80    4.40
  -7  16   0    2.60    1.60
  -7  16   0   -3.90    3.00
   6 -16   0   25.50    7.30
   6 -16   0   14.50    2.70
  -6  16   0   14.60    2.50
  -6  16   0   21.30    3.50
  -6  16   0   25.90    5.70
  -6  16   0   15.20    2.70
  -6  16   0   12.20    4.90
  -6  16   0    9.70    2.10
  -6  16   0   24.70    4.30
  -6  16   0   17.90    3.30
   5 -16   0    0.30    1.00
   5 -16   0   -0.70    2.30
   5 -16   0   -0.60    0.90
   5 -16   0    1.90    2.10
  -5  16   0    3.90    2.80
  -5  16   0    1.80    5.20
  -5  16   0    2.40    2.00
  -5  16   0    2.60    2.50
  -5  16   0    0.60    3.10
  -5  16   0    8.70    4.70
  -5  16   0   -0.80    1.40
  -5  16   0    1.90    4.30
   4 -16   0   44.00    5.10
   4 -16   0   48.50    4.50
   4 -16   0   49.50    2.70
   4 -16   0   47.60    5.50
   4 -16   0   45.30    2.50
  -4  16   0   53.69    7.50
  -4  16   0   49.70    8.40
  -4  16   0   56.69    8.20
  -4  16   0   41.30    2.60
  -4  16   0   41.30    3.70
  -4  16   0   44.70    5.10
  -4  16   0   42.00    4.50
  -4  16   0   53.79    6.10
  -4  16   0   49.20    5.30
   3 -16   0    4.20    1.50
   3 -16   0    3.30    1.50
   3 -16   0    3.30    2.60
   3 -16   0    0.10    2.30
   3 -16   0    4.50    3.30
  -3  16   0    9.70    4.70
  -3  16   0    9.00    4.90
  -3  16   0    5.30    2.90
  -3  16   0    1.50    1.70
  -3  16   0    4.10    2.60
  -3  16   0    7.90    3.20
  -3  16   0    4.10    4.50
  -3  16   0    4.10    2.30
   2 -16   0   52.59    4.80
   2 -16   0   50.19    3.00
   2 -16   0   56.09    5.80
   2 -16   0   47.00    3.20
   2 -16   0   48.70    4.80
  -2  16   0   47.60    4.90
  -2  16   0   51.19    3.70
  -2  16   0   55.09    7.90
  -2  16   0   47.90    5.50
  -2  16   0   58.59    3.90
  -2  16   0   50.29    6.90
   1 -16   0    6.40    3.90
   1 -16   0    6.50    3.30
   1 -16   0    8.30    2.20
   1 -16   0   11.00    3.00
   1 -16   0    7.30    1.90
  -1  16   0    8.10    3.20
  -1  16   0    8.70    3.40
  -1  16   0    5.70    2.40
  -1  16   0    8.20    2.40
  -1  16   0    9.00    5.10
  -1  16   0    3.90    2.70
  -1  16   0    9.00    4.60
   0 -16   0   66.99    4.20
   0 -16   0   67.89    4.90
   0 -16   0   64.69    5.10
   0 -16   0   84.49    7.80
   0 -16   0   64.19    9.40
   0  16   0   63.49    9.00
   0  16   0   67.39    8.50
   0  16   0   67.79    5.00
   0  16   0   77.09    5.90
   0  16   0   73.89    4.60
   0  16   0   65.19    3.40
  -1 -16   0    3.80    2.20
  -1 -16   0   -0.60    5.20
  -1 -16   0   -1.80    2.40
  -1 -16   0    0.70    2.20
  -1 -16   0   -1.20    2.80
   1  16   0    2.20    3.50
   1  16   0    2.20    3.00
   1  16   0   -0.60    4.80
   1  16   0    0.00    2.40
   1  16   0    1.40    3.60
   1  16   0    6.60    4.50
   1  16   0    0.00    1.00
  -2 -16   0   23.50    4.00
  -2 -16   0   24.80    4.90
  -2 -16   0   34.20    6.50
  -2 -16   0   27.80    3.30
  -2 -16   0   29.80    3.50
   2  16   0   22.10    3.90
   2  16   0   28.60    3.30
   2  16   0   31.90    3.60
   2  16   0   27.20    6.20
   2  16   0   23.30    5.50
  -3 -16   0    2.10    2.20
  -3 -16   0    0.10    2.90
  -3 -16   0    0.00    3.50
  -3 -16   0   -2.00    1.90
  -3 -16   0   -3.60    4.20
   3  16   0    3.10    4.50
   3  16   0    6.50    5.30
   3  16   0   -3.20    2.70
   3  16   0    3.40    2.50
   3  16   0   -3.00    2.00
   3  16   0    1.00    2.90
  -4 -16   0   60.49    7.60
  -4 -16   0   47.30    3.90
  -4 -16   0   50.59    5.20
  -4 -16   0   37.10    3.90
   4  16   0   56.89    8.30
   4  16   0   42.10    3.90
   4  16   0   46.80    7.40
   4  16   0   55.09    4.70
   4  16   0   48.00    4.50
   4  16   0   45.20    4.60
  -5 -16   0    2.50    2.40
  -5 -16   0    3.70    4.90
  -5 -16   0   -5.60    3.60
  -5 -16   0    2.10    2.50
  -5 -16   0   -5.10    2.90
   5  16   0   -0.40    1.40
   5  16   0    7.00    5.70
   5  16   0    2.00    2.40
   5  16   0    7.90    4.80
   5  16   0    1.00    3.10
   5  16   0    1.60    2.50
  -6 -16   0   25.00    3.60
  -6 -16   0   27.40    6.50
  -6 -16   0   23.40    4.60
  -6 -16   0   21.90    3.30
  -6 -16   0   24.10    5.00
  -6 -16   0   24.80    3.60
   6  16   0   25.50    3.20
   6  16   0   27.10    4.50
   6  16   0   19.90    5.80
   6  16   0   25.00    6.80
   6  16   0   24.50    3.60
   6  16   0   25.70    3.60
  -7 -16   0   20.10    6.30
  -7 -16   0   19.10    3.50
  -7 -16   0   21.50    3.40
  -7 -16   0   17.90    5.10
  -7 -16   0   18.50    4.30
  -7 -16   0   19.40    3.70
   7  16   0   19.20    4.40
   7  16   0   17.60    2.90
   7  16   0   14.80    6.40
   7  16   0   21.70    3.60
   7  16   0   14.30    3.40
  -8 -16   0   12.00    1.60
  -8 -16   0   14.60    3.40
  -8 -16   0    2.20    4.20
  -8 -16   0   12.70    3.20
  -8 -16   0   15.60    3.70
  -8 -16   0   18.50    3.20
   8  16   0   17.80    4.20
   8  16   0   11.20    2.50
   8  16   0    9.00    5.80
   8  16   0    8.80    6.10
   8  16   0   12.40    3.40
  -9 -16   0   19.60    4.20
  -9 -16   0   19.20    3.70
  -9 -16   0   10.60    5.50
  -9 -16   0   13.00    4.80
  -9 -16   0   12.80    3.20
   9  16   0   15.30    4.00
   9  16   0   10.80    3.50
   9  16   0    3.90    5.40
   9  16   0   10.40    3.20
   9  16   0   18.00    2.70
   9  16   0   10.20    6.10
 -10 -16   0    6.20    2.50
 -10 -16   0    8.70    4.20
 -10 -16   0   12.50    3.90
 -10 -16   0    7.90    2.30
 -10 -16   0    7.40    3.00
 -10 -16   0   12.10    5.10
  10  16   0    2.80    5.40
  10  16   0    8.50    2.50
  10  16   0    1.00    3.30
  10  16   0    5.90    5.20
  10  16   0    9.30    5.60
 -11 -16   0    6.80    2.70
 -11 -16   0    8.10    3.30
 -11 -16   0    7.50    3.30
 -11 -16   0    6.50    1.30
 -11 -16   0    6.90    3.50
 -11 -16   0    6.20    3.90
  11  16   0    1.70    5.10
  11  16   0    4.30    2.00
  11  16   0    4.00    4.80
  11  16   0    1.80    3.50
 -12 -16   0   -0.90    3.30
 -12 -16   0    1.40    3.40
 -12 -16   0   -1.00    3.20
 -12 -16   0    0.70    3.00
 -12 -16   0   -0.50    1.60
 -12 -16   0   -1.20    2.60
 -12 -16   0    1.50    3.80
  12  16   0   -0.10    5.30
  12  16   0    0.50    2.90
  12  16   0   -8.00    4.90
  12  16   0    3.70    3.60
  12  16   0   -0.90    1.60
  12  16   0   -2.60    4.80
 -13 -16   0   16.60    2.70
 -13 -16   0   16.60    4.10
 -13 -16   0   12.00    3.90
 -13 -16   0   11.30    4.10
 -13 -16   0   17.60    3.80
 -13 -16   0   20.90    4.40
 -13 -16   0   15.00    4.80
  13  16   0   12.00    6.50
  13  16   0   13.40    7.10
  13  16   0   12.80    3.60
  13  16   0    7.60    3.80
  13  16   0    7.70    2.10
  13  16   0   16.00    5.30
 -14 -16   0    1.00    1.90
 -14 -16   0   -0.50    3.80
 -14 -16   0   -2.50    3.50
 -14 -16   0   -0.80    5.20
 -14 -16   0   -2.80    2.60
 -14 -16   0   -3.30    8.10
 -14 -16   0    7.70    4.00
 -14 -16   0   -1.00    3.90
  14  16   0    0.60    3.50
  14  16   0    2.10    4.80
  14  16   0    5.50    5.10
  14  16   0    1.50    2.30
  14  16   0    1.70    3.00
  14  16   0   -1.90    4.40
  13 -17   0   -0.50    4.20
  13 -17   0    2.70    3.00
 -13  17   0    3.30    2.10
 -13  17   0   -0.70    3.50
 -13  17   0    2.90    1.50
 -13  17   0    4.80    2.10
 -12  17   0   30.20    6.20
  10 -17   0    9.40    3.70
  10 -17   0    4.50    3.50
 -10  17   0   -0.20    6.50
 -10  17   0   11.10    2.10
 -10  17   0    9.50    3.70
 -10  17   0    5.70    2.90
 -10  17   0    9.10    1.90
 -10  17   0    9.70    4.00
   9 -17   0    8.30    3.50
  -9  17   0    8.70    2.80
   8 -17   0   -0.10    3.30
  -8  17   0    0.40    2.90
  -8  17   0    1.40    2.30
   7 -17   0   -4.40    3.50
   7 -17   0    0.70    2.20
  -7  17   0    0.20    3.00
  -7  17   0    1.10    2.30
  -7  17   0    0.70    2.40
  -7  17   0    7.70    4.50
  -7  17   0    0.90    2.80
   6 -17   0   -0.30    1.80
   6 -17   0    8.40    5.80
  -6  17   0   -3.30    1.70
  -6  17   0   -0.30    1.90
  -6  17   0    0.80    3.40
  -6  17   0    2.00    4.20
  -6  17   0    1.10    2.60
  -6  17   0    0.30    3.60
  -6  17   0    0.00    1.80
  -6  17   0    3.10    3.20
   5 -17   0   30.60    1.80
   5 -17   0   30.90    3.00
   5 -17   0   29.50    1.90
  -5  17   0   40.40    6.50
  -5  17   0   33.40    6.20
  -5  17   0   25.70    4.30
  -5  17   0   32.20    4.40
  -5  17   0   31.90    4.30
  -5  17   0   35.50    3.10
  -5  17   0   29.80    3.10
   4 -17   0   -2.40    4.20
   4 -17   0   -2.10    2.40
   4 -17   0    1.20    1.30
   4 -17   0    0.00    1.20
   4 -17   0   -1.20    1.40
   4 -17   0   -0.60    4.70
  -4  17   0   -3.70    2.80
  -4  17   0    2.10    3.30
  -4  17   0   -1.60    1.00
  -4  17   0    1.90    2.80
  -4  17   0   -2.80    1.60
  -4  17   0   12.00    4.70
  -4  17   0   -1.80    2.20
  -4  17   0    3.10    4.50
  -4  17   0   12.00    5.10
   3 -17   0   39.70    4.60
   3 -17   0   42.60    5.50
   3 -17   0   47.00    5.80
   3 -17   0   40.30    2.70
   3 -17   0   41.20    3.00
  -3  17   0   43.20    4.80
  -3  17   0   40.00    4.90
  -3  17   0   45.10    6.90
  -3  17   0   43.00    3.90
  -3  17   0   64.89    7.40
  -3  17   0   42.10    4.10
  -3  17   0   45.00    6.90
  -3  17   0   43.90    3.60
   2 -17   0   21.70    2.50
   2 -17   0   18.50    2.40
   2 -17   0   16.90    4.30
   2 -17   0   18.30    3.10
   2 -17   0   18.00    3.80
  -2  17   0   18.70    4.70
  -2  17   0   18.40    2.70
  -2  17   0   16.90    5.50
  -2  17   0   17.40    4.30
  -2  17   0   23.00    4.30
  -2  17   0   25.90    3.10
   1 -17   0   18.20    4.30
   1 -17   0   11.60    2.10
   1 -17   0   18.10    3.40
   1 -17   0   15.60    3.70
   1 -17   0   15.00    2.50
  -1  17   0   11.90    2.70
  -1  17   0   11.30    4.00
  -1  17   0   14.70    2.50
  -1  17   0   10.00    5.40
  -1  17   0   10.00    2.50
  -1  17   0   12.00    6.10
   0 -17   0    1.10    2.60
   0 -17   0    2.50    2.20
   0 -17   0   -0.60    2.10
   0 -17   0    0.30    3.50
   0 -17   0   -1.30    4.80
   0 -17   0    0.80    3.00
   0  17   0    2.60    2.20
   0  17   0    5.10    3.20
   0  17   0    2.40    3.60
   0  17   0    2.30    1.60
   0  17   0    2.60    5.40
   0  17   0   -0.50    2.00
   0  17   0    2.30    5.20
  -1 -17   0   27.40    3.40
  -1 -17   0   26.40    4.30
  -1 -17   0   33.80    6.60
  -1 -17   0   36.50    5.50
  -1 -17   0   25.10    3.30
   1  17   0   32.60    9.70
   1  17   0   21.90    6.30
   1  17   0   31.80    4.60
   1  17   0   29.20    4.50
   1  17   0   28.60    3.50
   1  17   0   31.00    3.90
  -2 -17   0   31.80    3.30
  -2 -17   0   39.80    6.70
  -2 -17   0   28.70    3.50
  -2 -17   0   29.50    3.30
  -2 -17   0   27.00    4.50
  -2 -17   0   20.80    4.70
   2  17   0   33.90    4.70
   2  17   0   34.00    3.90
   2  17   0   31.50    4.30
   2  17   0   15.60    6.10
   2  17   0   27.20    3.50
  -3 -17   0   36.70    6.70
  -3 -17   0   35.30    4.70
  -3 -17   0   45.10    5.80
  -3 -17   0   27.70    3.40
  -3 -17   0   33.20    3.70
   3  17   0   34.70    4.20
   3  17   0   36.90    4.90
   3  17   0   31.10    3.90
   3  17   0   33.40    7.80
   3  17   0   28.60    6.80
   3  17   0   29.50    3.80
  -4 -17   0   24.90    3.30
  -4 -17   0   19.60    4.90
  -4 -17   0   23.70    5.80
  -4 -17   0   18.50    4.10
  -4 -17   0   14.40    3.00
   4  17   0   25.00    6.60
   4  17   0   22.30    7.50
   4  17   0   21.20    3.50
   4  17   0   17.60    3.40
   4  17   0   17.60    3.30
   4  17   0   20.70    4.20
  -5 -17   0   64.19    7.00
  -5 -17   0   50.29    4.50
  -5 -17   0   53.99    5.00
  -5 -17   0   51.79    4.20
  -5 -17   0   71.09    8.90
   5  17   0   57.29    4.40
   5  17   0   60.39    8.80
   5  17   0   61.59    8.60
   5  17   0   58.89    5.00
   5  17   0   53.09    4.90
   5  17   0   53.09    5.80
  -6 -17   0   10.50    3.00
  -6 -17   0    9.20    3.70
  -6 -17   0    5.80    4.30
  -6 -17   0    3.50    2.90
  -6 -17   0    8.00    5.30
  -6 -17   0    8.20    2.70
   6  17   0   10.80    3.10
   6  17   0   11.30    3.00
   6  17   0   13.20    6.40
   6  17   0    7.40    5.50
   6  17   0   11.00    2.70
  -7 -17   0   43.20    4.10
  -7 -17   0   40.30    4.60
  -7 -17   0   32.40    5.80
  -7 -17   0   50.39    8.00
  -7 -17   0   40.90    4.70
  -7 -17   0   41.10    5.50
   7  17   0   45.70    4.80
   7  17   0   42.00    5.60
   7  17   0   45.70    8.00
   7  17   0   36.30    7.20
   7  17   0   47.30    4.10
  -8 -17   0   19.30    3.40
  -8 -17   0   26.90    4.60
  -8 -17   0   17.30    3.70
  -8 -17   0   21.30    3.70
  -8 -17   0   14.10    4.80
   8  17   0   15.90    6.00
   8  17   0   20.40    4.50
   8  17   0   19.90    3.70
   8  17   0   19.50    7.00
   8  17   0   27.40    3.00
  -9 -17   0   14.90    3.20
  -9 -17   0   12.70    1.50
  -9 -17   0   10.40    3.30
  -9 -17   0   15.70    4.80
  -9 -17   0   17.90    4.00
  -9 -17   0   17.00    4.10
   9  17   0   16.20    4.20
   9  17   0   14.90    2.30
   9  17   0    9.00    3.30
   9  17   0   11.50    6.10
   9  17   0    8.50    6.20
   9  17   0    9.40    2.60
 -10 -17   0   16.60    3.40
 -10 -17   0   21.60    5.20
 -10 -17   0   15.60    3.60
 -10 -17   0   10.30    4.00
 -10 -17   0   11.60    4.20
  10  17   0   13.40    6.50
  10  17   0    9.40    6.10
  10  17   0   16.00    3.70
  10  17   0   15.60    4.50
  10  17   0   10.10    3.30
 -11 -17   0   12.30    4.50
 -11 -17   0    9.20    2.70
 -11 -17   0    5.80    3.50
 -11 -17   0    7.10    3.50
 -11 -17   0    4.30    3.10
 -11 -17   0    8.50    3.70
  11  17   0   11.00    6.90
  11  17   0    7.10    4.00
  11  17   0    6.30    3.00
  11  17   0    8.70    3.00
  11  17   0    2.10    5.80
 -12 -17   0    5.80    3.00
 -12 -17   0    8.00    3.40
 -12 -17   0   13.00    4.90
 -12 -17   0    2.20    3.50
  12  17   0   14.40    4.00
  12  17   0    4.60    3.90
  12  17   0   -3.30    4.80
  12  17   0    8.00    3.00
  12  17   0   -0.80    6.30
 -13 -17   0   -0.10    1.30
 -13 -17   0    4.20    4.40
 -13 -17   0    4.00    3.30
 -13 -17   0    0.00    3.40
 -13 -17   0    1.10    3.20
 -13 -17   0    8.50    3.80
 -13 -17   0   -0.30    3.00
  13  17   0    2.00    2.90
  13  17   0    1.70    3.40
  13  17   0    6.00    5.10
  13  17   0    3.90    5.20
 -14 -17   0   12.40    4.30
 -14 -17   0   19.30    4.00
 -14 -17   0    5.10    3.80
 -14 -17   0    7.00    3.60
 -14 -17   0    7.50    3.40
 -14 -17   0    6.40    3.00
 -14 -17   0   12.70    4.00
 -14 -17   0   11.40    5.40
  14  17   0    6.70    2.20
  14  17   0    8.60    3.50
  14  17   0    5.80    4.00
  14  17   0   13.30    5.70
  14  17   0    7.30    3.50
  12 -18   0    0.50    3.00
 -12  18   0    2.00    2.00
 -12  18   0    2.80    1.70
 -12  18   0   -3.50    4.80
 -12  18   0    7.90    2.70
 -12  18   0    1.70    3.90
  11 -18   0   -3.40    4.10
  11 -18   0    1.60    4.20
 -11  18   0    2.50    1.70
 -11  18   0   -0.40    3.50
 -11  18   0    4.30    3.80
 -11  18   0    4.70    2.30
   8 -18   0    0.10    3.70
   8 -18   0    2.30    2.50
  -8  18   0   -0.60    4.10
  -8  18   0    6.30    4.30
  -8  18   0   -0.60    3.60
  -8  18   0    1.50    2.60
  -8  18   0   -0.10    2.40
  -8  18   0    1.40    1.70
   7 -18   0    0.70    3.10
   7 -18   0    2.40    2.40
  -7  18   0    1.50    2.40
  -7  18   0    8.90    4.20
  -7  18   0    1.90    2.40
  -7  18   0   -0.50    3.10
   6 -18   0   17.10    2.70
   6 -18   0   16.10    4.30
  -6  18   0   16.90    4.10
  -6  18   0   25.70    2.90
  -6  18   0   19.50    5.80
  -6  18   0   23.00    4.00
  -6  18   0   21.10    5.90
  -6  18   0   17.20    2.70
  -6  18   0   25.80    5.30
  -6  18   0   14.90    2.70
   5 -18   0    0.90    0.90
   5 -18   0    4.60    3.60
  -5  18   0   -0.80    2.10
  -5  18   0    5.70    4.70
  -5  18   0    0.00    1.30
  -5  18   0   -1.00    2.00
  -5  18   0   -3.70    4.30
  -5  18   0    7.00    4.70
  -5  18   0    2.20    5.20
  -5  18   0   -0.90    3.00
   4 -18   0   43.30    2.60
   4 -18   0   43.50    4.60
   4 -18   0   40.80    4.70
   4 -18   0   59.59    6.10
   4 -18   0   46.10    2.60
  -4  18   0   52.79    3.90
  -4  18   0   41.70    5.50
  -4  18   0   42.70    4.10
  -4  18   0   44.90    4.60
  -4  18   0   45.50    7.10
  -4  18   0   41.70    5.20
  -4  18   0   46.60    7.20
   3 -18   0    0.90    1.40
   3 -18   0    2.90    1.40
   3 -18   0    2.90    3.70
   3 -18   0    2.20    3.10
   3 -18   0    3.50    2.80
  -3  18   0   -1.40    5.00
  -3  18   0    5.30    2.10
  -3  18   0    3.10    3.10
  -3  18   0    1.20    3.50
  -3  18   0   10.40    5.10
  -3  18   0    1.20    2.50
  -3  18   0   -1.50    3.50
   2 -18   0   17.90    2.40
   2 -18   0   19.50    4.60
   2 -18   0   17.50    3.30
   2 -18   0   20.00    2.30
   2 -18   0   15.20    3.60
  -2  18   0   24.70    4.00
  -2  18   0   25.80    4.30
  -2  18   0   17.80    6.00
  -2  18   0   29.00    6.10
  -2  18   0   22.70    3.00
   1 -18   0   18.90    2.30
   1 -18   0   17.90    4.00
   1 -18   0   19.30    3.60
   1 -18   0   24.60    5.00
   1 -18   0   15.40    2.50
  -1  18   0   15.00    5.80
  -1  18   0   19.70    4.30
  -1  18   0   15.00    3.10
  -1  18   0   19.20    2.80
  -1  18   0   16.10    3.80
  -1  18   0   15.70    2.50
  -1  18   0   17.50    5.70
   0 -18   0   24.70    4.50
   0 -18   0   38.50    6.90
   0 -18   0   27.00    5.40
   0 -18   0   20.20    2.90
   0 -18   0   27.10    3.10
   0 -18   0   25.70    3.80
   0  18   0   22.20    2.10
   0  18   0   21.80    6.30
   0  18   0   23.50    3.40
   0  18   0   23.30    3.30
   0  18   0   29.60    6.40
   0  18   0   24.80    4.50
   0  18   0   25.40    4.60
  -1 -18   0    3.90    3.40
  -1 -18   0   -1.60    2.10
  -1 -18   0   -2.40    2.30
  -1 -18   0    3.00    5.40
  -1 -18   0    3.40    4.00
   1  18   0   -0.10    3.50
   1  18   0    0.50    3.50
   1  18   0   -0.10    2.40
   1  18   0   -2.30    4.90
   1  18   0    1.90    2.40
   1  18   0   -2.70    5.50
  -2 -18   0   55.19    8.20
  -2 -18   0   50.39    4.40
  -2 -18   0   52.29    4.40
  -2 -18   0   64.09    6.70
  -2 -18   0   45.20    5.50
   2  18   0   52.39    4.70
   2  18   0   43.80    7.70
   2  18   0   52.79    4.70
   2  18   0   45.20    5.70
   2  18   0   51.79    4.70
   2  18   0   44.80    7.20
  -3 -18   0    6.40    2.70
  -3 -18   0   13.00    4.50
  -3 -18   0    3.30    2.80
  -3 -18   0    1.50    3.40
  -3 -18   0   15.70    5.70
   3  18   0    4.50    3.60
   3  18   0    4.20    3.10
   3  18   0    2.40    2.50
   3  18   0    7.00    5.30
   3  18   0    4.10    2.70
   3  18   0   10.40    6.00
  -4 -18   0   35.20    4.20
  -4 -18   0   40.90    3.80
  -4 -18   0   35.00    5.20
  -4 -18   0   33.80    3.90
  -4 -18   0   30.50    5.70
  -4 -18   0   44.60    7.50
   4  18   0   36.00    5.20
   4  18   0   30.90    6.00
   4  18   0   38.80    4.40
   4  18   0   40.40    4.30
   4  18   0   37.30    4.20
   4  18   0   31.40    6.90
  -5 -18   0    2.30    2.60
  -5 -18   0    3.00    3.20
  -5 -18   0   -2.90    3.50
  -5 -18   0   -4.60    2.20
  -5 -18   0    0.50    2.30
   5  18   0   -0.10    2.20
   5  18   0    1.00    5.10
   5  18   0   -1.90    2.30
   5  18   0   -2.50    3.10
   5  18   0   -3.90    5.70
  -6 -18   0   23.80    4.50
  -6 -18   0   29.60    3.70
  -6 -18   0   26.70    3.50
  -6 -18   0   28.50    5.60
   6  18   0   28.00    6.50
   6  18   0   28.70    3.90
   6  18   0   32.00    3.70
   6  18   0   30.70    7.40
   6  18   0   27.80    4.90
  -7 -18   0    1.00    2.40
  -7 -18   0   -0.80    5.70
  -7 -18   0    4.70    2.70
  -7 -18   0    0.30    2.70
  -7 -18   0    0.60    2.20
  -7 -18   0    3.40    4.40
   7  18   0    1.60    5.50
   7  18   0    2.10    2.50
   7  18   0   -2.20    3.20
   7  18   0   -3.80    5.60
   7  18   0    3.70    2.00
  -8 -18   0    9.30    2.80
  -8 -18   0    6.80    3.20
  -8 -18   0    2.70    3.20
  -8 -18   0   -1.60    5.80
  -8 -18   0    9.80    4.70
  -8 -18   0    3.60    2.60
   8  18   0    3.20    2.70
   8  18   0    8.30    2.00
   8  18   0    7.70    5.60
   8  18   0    8.20    3.20
   8  18   0    3.50    2.60
  -9 -18   0    8.60    4.70
  -9 -18   0   19.00    4.20
  -9 -18   0   16.20    3.70
  -9 -18   0   12.80    3.10
   9  18   0   13.00    3.50
   9  18   0   14.50    3.30
   9  18   0    0.60    6.00
   9  18   0    9.00    3.30
   9  18   0    9.50    6.50
 -10 -18   0    2.40    2.70
 -10 -18   0    4.70    4.50
 -10 -18   0    4.40    3.40
 -10 -18   0    3.90    2.90
 -10 -18   0    1.10    4.00
  10  18   0    5.10    3.90
  10  18   0    3.50    2.80
  10  18   0    1.50    3.30
  10  18   0   -0.30    5.60
 -11 -18   0    4.50    3.70
 -11 -18   0   13.50    3.70
 -11 -18   0   18.60    4.70
 -11 -18   0    9.70    3.10
 -11 -18   0   14.80    4.10
  11  18   0   -0.60    5.90
  11  18   0    5.40    3.20
  11  18   0    7.70    3.50
  11  18   0   10.40    6.40
 -12 -18   0    4.00    3.00
 -12 -18   0    3.50    2.40
 -12 -18   0   -1.50    3.80
 -12 -18   0    4.80    4.40
 -12 -18   0    6.80    3.10
 -12 -18   0   15.50    3.80
  12  18   0    3.10    3.60
  12  18   0   -1.10    5.40
  12  18   0   -1.70    5.50
  12  18   0    3.30    3.20
  12  18   0   -0.80    3.70
 -13 -18   0    9.10    4.00
 -13 -18   0    4.30    3.00
 -13 -18   0   16.20    6.10
 -13 -18   0    5.20    3.20
 -13 -18   0    4.80    3.10
  13  18   0    6.40    3.90
  13  18   0    6.70    4.10
  13  18   0    8.80    5.60
  13  18   0    2.30    3.90
  11 -19   0    3.10    3.20
  11 -19   0    0.60    3.60
 -11  19   0   -3.10    3.90
 -11  19   0    1.60    2.90
 -11  19   0   -1.00    3.90
 -11  19   0    2.80    1.60
  10 -19   0    4.90    4.10
 -10  19   0    5.00    5.50
   9 -19   0    0.10    2.80
   9 -19   0   -4.50    3.60
  -9  19   0    5.60    6.00
  -9  19   0   -1.00    3.20
  -9  19   0    1.70    2.10
  -9  19   0   -0.50    2.80
  -9  19   0    1.20    2.90
  -9  19   0    3.50    3.80
  -9  19   0   13.10    4.90
   8 -19   0    2.50    2.50
  -8  19   0    3.00    2.60
  -8  19   0    0.70    3.30
  -8  19   0    5.90    5.40
  -8  19   0   10.50    4.60
  -8  19   0    3.00    2.60
   7 -19   0    1.10    3.70
  -7  19   0    2.30    3.20
  -7  19   0    4.30    1.90
  -7  19   0    1.30    2.70
  -7  19   0    3.30    3.40
  -7  19   0    2.70    1.60
  -7  19   0    3.60    5.40
  -7  19   0    4.70    2.10
  -7  19   0   10.10    4.60
  -6  19   0    6.90    5.00
  -6  19   0   18.00    5.60
   5 -19   0    9.00    1.00
   5 -19   0    7.80    4.40
   5 -19   0    8.80    1.00
  -5  19   0   12.70    2.50
  -5  19   0   11.00    3.30
  -5  19   0   15.50    3.70
  -5  19   0    8.20    2.60
  -5  19   0    9.20    3.70
  -5  19   0   13.10    5.20
   4 -19   0    7.50    1.70
   4 -19   0    8.90    1.50
   4 -19   0   13.80    3.60
   4 -19   0   11.60    4.30
  -4  19   0   14.90    5.70
  -4  19   0    5.90    2.90
  -4  19   0    7.80    5.50
  -4  19   0    6.90    2.50
  -4  19   0    9.90    3.60
  -4  19   0    6.30    5.40
  -4  19   0    9.60    2.30
   3 -19   0   12.40    1.90
   3 -19   0   15.50    3.60
   3 -19   0   13.80    3.20
   3 -19   0   12.60    1.80
   3 -19   0   14.40    4.30
  -3  19   0   11.10    2.70
  -3  19   0   11.10    3.00
  -3  19   0   16.70    5.70
  -3  19   0   12.10    3.10
  -3  19   0   22.10    4.00
  -3  19   0   14.10    3.70
  -3  19   0    6.70    5.60
   2 -19   0    2.30    2.80
   2 -19   0    1.30    1.50
   2 -19   0    1.30    1.60
   2 -19   0   -5.40    3.80
   2 -19   0   -3.20    2.00
  -2  19   0    5.20    4.80
  -2  19   0    3.10    2.40
  -2  19   0   -2.10    2.80
  -2  19   0   -1.80    4.90
  -2  19   0    4.10    2.60
  -2  19   0    0.00    3.00
   1 -19   0    8.10    1.80
   1 -19   0   10.90    3.30
   1 -19   0   16.60    3.70
   1 -19   0   10.70    4.40
   1 -19   0   11.30    1.90
  -1  19   0   11.10    3.00
  -1  19   0   14.10    2.10
  -1  19   0   11.40    4.10
  -1  19   0   10.80    5.30
  -1  19   0    9.10    2.80
  -1  19   0   15.70    4.00
  -1  19   0    7.30    5.80
   0 -19   0    4.20    4.10
   0 -19   0    0.70    2.80
   0 -19   0   -0.30    2.20
   0 -19   0    2.10    1.70
   0 -19   0    0.00    2.10
   0  19   0    1.60    4.90
   0  19   0   -6.00    3.40
   0  19   0    0.60    2.40
   0  19   0    1.20    2.30
   0  19   0   -0.40    5.30
   0  19   0    0.40    0.80
   0  19   0    3.80    2.30
  -1 -19   0   56.79    4.40
  -1 -19   0   66.59    8.40
  -1 -19   0   54.69    4.10
  -1 -19   0   50.69    5.90
  -1 -19   0   60.99    4.90
  -1 -19   0   63.29    7.10
   1  19   0   49.60    8.40
   1  19   0   60.29    5.00
   1  19   0   73.09   10.90
   1  19   0   53.39    5.70
   1  19   0   62.09    6.40
   1  19   0   65.39    5.10
  -2 -19   0    1.60    3.90
  -2 -19   0    6.30    2.70
  -2 -19   0    2.80    2.70
  -2 -19   0   11.40    5.90
  -2 -19   0    2.30    3.40
   2  19   0    5.60    2.60
   2  19   0   10.30    6.50
   2  19   0    2.40    2.50
   2  19   0    7.40    4.00
   2  19   0    1.30    3.40
   2  19   0   11.20    5.70
  -3 -19   0   61.79    8.70
  -3 -19   0   43.10    5.70
  -3 -19   0   62.79    6.90
  -3 -19   0   56.09    4.70
  -3 -19   0   52.69    4.00
   3  19   0   59.29    5.10
   3  19   0   62.29    9.30
   3  19   0   55.29    8.40
   3  19   0   44.90    4.70
   3  19   0   55.99    6.10
  -4 -19   0   -5.50    2.60
  -4 -19   0   -1.00    5.20
  -4 -19   0   -0.30    3.40
  -4 -19   0    2.30    3.90
  -4 -19   0    0.30    2.30
   4  19   0    5.30    5.30
   4  19   0   -2.60    5.70
   4  19   0    2.00    2.50
   4  19   0   -0.70    2.20
   4  19   0   -2.00    3.10
  -5 -19   0   30.80    4.90
  -5 -19   0   26.00    3.40
  -5 -19   0   20.20    3.20
  -5 -19   0   22.50    5.40
  -5 -19   0   22.70    3.60
   5  19   0   18.70    3.20
   5  19   0   24.90    6.60
   5  19   0   17.60    7.10
   5  19   0   24.40    3.80
   5  19   0   26.60    4.90
  -6 -19   0    0.20    2.60
  -6 -19   0   -0.20    3.00
  -6 -19   0   -5.50    3.60
  -6 -19   0   -0.10    2.40
   6  19   0   -2.30    3.10
   6  19   0    8.30    6.20
   6  19   0    3.90    1.90
   6  19   0   -5.00    2.20
   6  19   0    5.40    5.40
   6  19   0   -0.30    2.20
  -7 -19   0   21.50    3.80
  -7 -19   0    9.80    5.00
  -7 -19   0   22.80    7.30
  -7 -19   0   27.70    3.60
  -7 -19   0   23.50    4.60
  -7 -19   0   28.90    4.10
   7  19   0   18.10    6.60
   7  19   0   23.70    7.40
   7  19   0   24.80    5.00
   7  19   0   23.60    3.90
   7  19   0   31.90    3.00
  -8 -19   0    0.10    2.20
  -8 -19   0   -3.00    4.10
  -8 -19   0   -6.20    5.70
  -8 -19   0    1.00    3.00
  -8 -19   0    2.60    2.50
  -8 -19   0    3.50    3.70
   8  19   0    5.40    5.70
   8  19   0   -2.50    6.30
   8  19   0   -0.40    3.40
   8  19   0    0.90    2.90
   8  19   0    2.20    2.80
  -9 -19   0   -7.70    7.50
  -9 -19   0    4.20    3.60
  -9 -19   0   -1.80    2.70
  -9 -19   0    5.30    4.40
  -9 -19   0    4.20    3.10
  -9 -19   0   -1.90    2.50
   9  19   0  -12.70    6.50
   9  19   0    2.20    2.40
   9  19   0    5.20    2.90
   9  19   0   -5.00    6.40
 -10 -19   0    7.20    3.60
 -10 -19   0    2.10    3.00
 -10 -19   0   13.70    5.10
  10  19   0    3.20    6.00
  10  19   0    3.70    3.80
  10  19   0    9.90    3.40
  10  19   0   -3.40    5.70
 -11 -19   0   13.60    4.00
 -11 -19   0   13.60    3.20
 -11 -19   0    7.80    4.80
 -11 -19   0   11.40    3.40
  11  19   0    6.80    3.80
  11  19   0    5.10    6.50
  11  19   0    8.80    3.70
  11  19   0   19.30    6.90
  11  19   0   10.20    3.50
  -9  20   0   23.60    5.50
   8 -20   0    0.50    3.90
   8 -20   0   10.00    2.80
  -8  20   0    7.70    2.50
  -8  20   0    6.90    3.20
  -8  20   0   22.60    5.40
  -8  20   0    7.60    2.00
  -8  20   0    1.50    3.80
  -8  20   0    7.30    2.20
  -8  20   0    5.70    3.20
   7 -20   0   -0.80    3.90
   7 -20   0    7.70    2.50
  -7  20   0    6.20    3.50
  -7  20   0    9.30    5.80
  -7  20   0    2.80    4.50
  -7  20   0    8.30    2.40
  -7  20   0   23.00    6.00
  -7  20   0   10.20    3.40
  -6  20   0   10.10    5.20
   5 -20   0   15.20    4.90
  -5  20   0   16.80    3.70
  -5  20   0    8.80    3.10
  -5  20   0   11.50    2.70
  -5  20   0   12.10    2.70
  -5  20   0   19.00    5.70
  -5  20   0    2.50    4.20
  -4  20   0    6.10    5.20
   3 -20   0    9.70    1.70
   3 -20   0   13.70    4.50
   3 -20   0    9.40    3.60
   3 -20   0    8.50    1.50
  -3  20   0    6.30    2.60
  -3  20   0   10.80    5.10
  -3  20   0    5.80    2.70
  -3  20   0    2.00    4.30
  -3  20   0   10.10    6.30
  -3  20   0   10.50    2.80
  -3  20   0    7.30    3.40
   2 -20   0    2.10    3.00
   2 -20   0   -0.90    3.90
   2 -20   0    3.10    3.00
  -2  20   0    4.00    3.10
  -2  20   0    3.00    4.40
  -2  20   0   -1.00    5.20
  -2  20   0    3.40    3.70
  -2  20   0    2.30    3.30
  -2  20   0    0.30    2.90
   1 -20   0    3.10    2.70
   1 -20   0    0.30    2.80
   1 -20   0    1.30    1.80
   1 -20   0   -3.70    1.60
   1 -20   0   -4.60    4.10
  -1  20   0    1.40    3.30
  -1  20   0   -0.50    2.80
  -1  20   0    3.50    5.80
  -1  20   0   10.20    2.20
  -1  20   0    2.10    2.10
  -1  20   0    4.40    4.70
  -1  20   0    2.50    1.40
  -1  20   0    1.60    2.80
   0 -20   0   15.50    5.40
   0 -20   0   22.80    3.20
   0 -20   0   18.10    2.50
   0 -20   0   24.70    4.20
   0 -20   0   17.70    2.50
   0  20   0   21.80    3.30
   0  20   0   29.90    4.80
   0  20   0   21.00    4.30
   0  20   0   16.10    6.00
   0  20   0   14.10    7.00
   0  20   0   25.10    3.80
  -1 -20   0    6.70    4.90
  -1 -20   0    0.40    2.60
  -1 -20   0   -1.20    1.90
  -1 -20   0    2.20    2.40
  -1 -20   0    0.40    3.30
   1  20   0   -1.70    3.40
   1  20   0    0.00    2.90
   1  20   0   -1.40    2.40
   1  20   0    1.90    3.60
   1  20   0   -0.80    5.20
  -2 -20   0   36.50    5.20
  -2 -20   0   24.90    3.40
  -2 -20   0   25.70    5.80
  -2 -20   0   30.20    3.50
  -2 -20   0   23.00    3.40
   2  20   0   30.30    5.10
   2  20   0   23.40    7.20
   2  20   0   21.10    4.00
   2  20   0   44.40    5.00
   2  20   0   25.20    7.60
  -3 -20   0    2.10    3.30
  -3 -20   0    5.20    4.50
  -3 -20   0    2.10    2.30
  -3 -20   0    3.90    3.50
   3  20   0    5.10    4.90
   3  20   0    4.00    4.30
   3  20   0   -1.50    2.70
   3  20   0    4.30    3.50
   3  20   0   -1.00    2.20
  -4 -20   0   19.10    5.40
  -4 -20   0   20.30    3.30
  -4 -20   0   13.40    3.50
  -4 -20   0   29.90    6.80
  -4 -20   0   14.90    3.40
   4  20   0   15.90    3.20
   4  20   0   24.90    7.20
   4  20   0   18.20    6.80
   4  20   0   22.40    4.80
   4  20   0   14.20    3.40
  -5 -20   0   -3.10    4.10
  -5 -20   0   -4.40    2.10
  -5 -20   0    2.40    3.50
  -5 -20   0    2.80    2.30
   5  20   0    4.30    3.20
   5  20   0   -6.90    6.80
   5  20   0    2.30    2.70
   5  20   0   -1.40    2.00
   5  20   0   -0.60    5.70
  -6 -20   0   19.60    3.50
  -6 -20   0   10.20    5.20
  -6 -20   0   21.30    3.20
  -6 -20   0   14.40    4.00
  -6 -20   0   14.70    3.40
   6  20   0   17.10    6.90
   6  20   0   18.90    3.90
   6  20   0   17.30    4.40
   6  20   0   19.00    2.80
   6  20   0   13.50    3.40
  -7 -20   0   -3.70    4.40
  -7 -20   0   39.10   13.40
  -7 -20   0   -1.60    2.50
  -7 -20   0   -4.50    3.30
  -7 -20   0    3.50    2.70
   7  20   0    2.60    2.80
   7  20   0   -6.90    5.90
   7  20   0   -0.10    4.20
   7  20   0  -10.90    5.40
  -8 -20   0    9.10    4.00
  -8 -20   0   24.70    6.60
  -8 -20   0    8.00    5.10
  -8 -20   0    6.30    3.40
   8  20   0    3.20    3.00
   8  20   0   -2.20    6.50
   8  20   0    8.30    3.80
   8  20   0   11.10    3.30
   8  20   0   -0.20    5.90
  -9 -20   0    0.70    2.30
  -9 -20   0    1.80    3.30
  -9 -20   0    3.90    4.80
  -9 -20   0    4.00    2.50
  -9 -20   0   -1.40    4.50
   9  20   0    1.30    2.80
   9  20   0   -4.90    6.10
   9  20   0   15.40    6.50
   9  20   0    6.00    4.10
 -10 -20   0   14.80    5.50
 -10 -20   0   13.30    3.10
 -10 -20   0   13.50    4.30
 -10 -20   0    7.70    3.90
  10  20   0    5.30    6.50
  10  20   0    7.80    3.20
  10  20   0   11.00    4.40
   8 -21   0    7.40    2.60
   8 -21   0    0.50    3.70
  -8  21   0   -5.90    4.20
  -8  21   0    7.70    2.30
  -8  21   0   -2.50    3.70
  -8  21   0    5.20    2.20
  -8  21   0    4.30    2.40
  -8  21   0    8.30    3.40
   7 -21   0    9.20    4.20
  -7  21   0    2.10    3.20
  -7  21   0    5.80    2.50
  -7  21   0   20.00    5.90
  -7  21   0   -5.10    3.40
  -7  21   0    3.60    2.20
  -7  21   0    5.10    3.60
   6 -21   0   13.60    4.90
  -6  21   0    4.20    3.80
  -6  21   0    8.10    2.50
  -6  21   0    9.60    2.60
  -6  21   0    6.20    3.50
  -6  21   0   19.40    6.00
  -6  21   0    7.90    3.30
   5 -21   0    1.20    4.00
  -5  21   0    3.30    4.70
  -5  21   0   -1.80    3.00
  -5  21   0    4.10    2.90
  -5  21   0    2.10    3.30
  -5  21   0    3.80    2.10
  -5  21   0    0.60    1.90
   4 -21   0    5.90    1.10
   4 -21   0    3.40    1.10
   4 -21   0   -2.70    3.90
  -4  21   0    1.20    4.00
  -4  21   0    2.10    3.30
  -4  21   0    1.30    2.80
  -4  21   0    9.90    5.80
  -4  21   0    3.50    2.20
   3 -21   0    4.30    3.00
   3 -21   0   -0.10    2.10
   3 -21   0   -3.20    3.90
  -3  21   0    3.50    3.50
  -3  21   0   -1.50    3.70
  -3  21   0    9.40    5.20
   2 -21   0   -0.30    2.90
   2 -21   0    2.50    2.80
   2 -21   0   -0.90    1.70
   2 -21   0    1.90    1.50
   2 -21   0   -6.60    3.80
  -2  21   0   -1.90    1.70
  -2  21   0    2.10    3.30
  -2  21   0    3.20    3.70
  -2  21   0    3.00    4.80
   1 -21   0    7.80    3.30
   1 -21   0   17.40    3.90
   1 -21   0    1.50    5.10
   1 -21   0   10.10    2.10
  -1  21   0    7.60    2.50
  -1  21   0    9.60    4.20
  -1  21   0    9.00    4.00
  -1  21   0   14.80    5.80
   0 -21   0    1.00    2.10
   0 -21   0    7.60    2.80
   0 -21   0   -1.00    4.70
   0 -21   0    3.40    3.20
   0  21   0    5.00    3.80
   0  21   0    0.00    2.70
   0  21   0   -1.60    2.80
   0  21   0    1.80    3.00
   0  21   0    1.80    5.20
  -1 -21   0   15.50    5.90
  -1 -21   0   34.50    4.00
  -1 -21   0   29.90    3.50
  -1 -21   0   29.70    5.00
   1  21   0   29.20    3.90
   1  21   0   18.70    6.90
   1  21   0   27.80    3.90
   1  21   0   28.10    4.50
   1  21   0   29.90    5.10
  -2 -21   0   11.60    2.70
  -2 -21   0   10.80    3.90
  -2 -21   0    4.30    2.50
  -2 -21   0   12.10    5.30
   2  21   0    4.10    2.70
   2  21   0   -0.80    5.70
   2  21   0    4.80    3.40
   2  21   0    8.90    4.10
  -3 -21   0   15.20    5.40
  -3 -21   0   21.40    5.50
  -3 -21   0   44.10    8.50
  -3 -21   0   12.70    2.70
  -3 -21   0   17.50    3.00
   3  21   0   17.60    6.40
   3  21   0   16.90    3.50
   3  21   0   19.00    3.50
   3  21   0   21.40    8.20
   3  21   0   16.60    4.50
  -4 -21   0    0.30    4.60
  -4 -21   0    3.30    3.00
  -4 -21   0    7.20    2.40
   4  21   0    9.50    5.70
   4  21   0   -0.20    2.20
   4  21   0   16.10    6.70
   4  21   0    4.60    3.80
   4  21   0    3.30    2.60
  -5 -21   0   10.40    3.50
  -5 -21   0   10.00    5.30
  -5 -21   0   21.60    4.40
  -5 -21   0   17.10    2.70
   5  21   0   18.70    2.90
   5  21   0   18.40    3.60
   5  21   0   16.20    5.30
   5  21   0   12.90    6.70
   5  21   0   15.20    7.60
  -6 -21   0    3.80    2.60
  -6 -21   0    3.50    3.60
  -6 -21   0    2.70    4.80
  -6 -21   0    2.70    2.40
   6  21   0    7.30    6.20
   6  21   0    3.80    3.50
   6  21   0    6.20    3.00
   6  21   0    3.30    3.00
   6  21   0   -0.20    4.50
  -7 -21   0    9.10    2.90
  -7 -21   0    4.40    3.60
  -7 -21   0    4.00    5.10
  -7 -21   0    5.80    2.60
  -7 -21   0    6.70    3.40
   7  21   0   -6.20    6.70
   7  21   0   11.50    7.10
   7  21   0    7.00    3.20
   7  21   0    3.20    3.70
  -8 -21   0    6.10    5.20
  -8 -21   0   -2.20    3.30
  -8 -21   0   -2.60    4.80
  -8 -21   0    1.40    2.20
  -8 -21   0    3.00    2.50
   8  21   0   -9.80    5.70
   8  21   0    0.80    4.10
   8  21   0    2.30    3.00
   8  21   0    0.70    2.90
   5 -22   0    2.10    4.30
  -5  22   0    1.80    2.50
  -5  22   0   -0.80    3.30
  -5  22   0   -0.80    3.00
  -5  22   0    5.70    3.70
  -5  22   0    2.20    2.30
   4 -22   0    0.50    5.30
   4 -22   0    0.10    0.90
  -4  22   0   -2.10    1.90
  -4  22   0   -3.90    2.20
  -4  22   0   -3.40    3.50
  -4  22   0   -5.30    3.10
   3 -22   0    0.90    1.40
   3 -22   0    5.90    3.30
   3 -22   0   -8.00    4.70
   3 -22   0    1.00    1.30
  -3  22   0   -1.10    3.40
  -3  22   0    5.20    3.60
  -3  22   0   -0.60    2.00
  -3  22   0   12.00    5.40
  -3  22   0    6.00    3.70
   2 -22   0    3.20    2.40
   2 -22   0    8.60    3.10
   2 -22   0    2.40    1.50
   2 -22   0   -2.50    4.40
  -2  22   0    3.20    1.30
  -2  22   0   -8.90    5.50
  -2  22   0    0.00    3.00
  -2  22   0    0.40    3.70
  -2  22   0    6.00    5.40
  -2  22   0    5.60    2.40
   1 -22   0   -5.50    4.00
   1 -22   0    5.00    2.80
   1 -22   0    5.60    3.20
   1 -22   0    0.70    1.70
   1 -22   0    1.20    1.80
  -1  22   0   -1.00    3.30
  -1  22   0   -4.50    5.90
  -1  22   0    5.60    5.00
  -1  22   0    3.50    5.20
  -1  22   0    4.60    3.70
   0 -22   0    7.50    2.90
   0 -22   0    5.10    2.20
   0 -22   0    1.80    2.00
   0 -22   0    2.00    5.20
   0  22   0   -7.90    6.10
   0  22   0    6.70    4.00
   0  22   0    4.90    6.00
   0  22   0    9.10    2.70
   0  22   0    5.20    3.80
  -1 -22   0   -2.70    4.60
  -1 -22   0    5.40    2.60
  -1 -22   0    2.70    1.80
  -1 -22   0    9.20    2.70
  -1 -22   0   11.50    5.00
   1  22   0   -1.30    5.80
   1  22   0   -4.00    4.20
   1  22   0    2.20    3.60
   1  22   0    3.80    2.70
  -2 -22   0    5.60    2.60
  -2 -22   0    4.90    3.60
  -2 -22   0    8.30    2.70
  -2 -22   0   -5.30    4.60
  -2 -22   0   13.10    2.60
   2  22   0    7.30    3.50
   2  22   0    1.00    6.80
   2  22   0   -3.30    5.60
   2  22   0    0.80    2.60
  -3 -22   0    6.60    2.60
  -3 -22   0    4.60    2.90
  -3 -22   0    3.60    3.50
  -3 -22   0   -4.40    4.20
  -3 -22   0    5.10    2.40
   3  22   0    7.60    6.90
   3  22   0    4.30    3.80
   3  22   0   14.20    6.10
   3  22   0   -0.70    2.70
  -4 -22   0    7.60    2.50
  -4 -22   0    4.00    4.60
  -4 -22   0   14.50    2.70
  -4 -22   0   12.00    4.00
  -4 -22   0    4.60    3.10
   4  22   0   16.60    7.00
   4  22   0    6.30    2.70
   4  22   0    7.70    6.30
   4  22   0    9.80    3.10
   4  22   0    5.60    2.90
  -5 -22   0    4.60    2.80
  -5 -22   0    2.00    4.90
  -5 -22   0    4.30    4.10
  -5 -22   0    6.80    2.20
  -5 -22   0    5.00    2.60
   5  22   0    3.50    3.70
   5  22   0    3.20    5.80
   5  22   0    0.00    2.60
   5  22   0    7.00    1.90
   5  22   0    1.70    7.60
  -6 -22   0   -0.20    5.10
   4  22  -1   -3.60    7.30
   4  22  -1    4.60    2.90
   4  22  -1    0.40    2.70
   4  22  -1    3.70    3.70
  -4 -22   1    4.10    2.50
  -4 -22   1   12.10    3.90
  -4 -22   1   -2.60    4.70
  -4 -22   1    5.70    2.10
   3  22  -1    2.20    2.00
   3  22  -1    7.90    6.10
   3  22  -1    1.20    3.50
   3  22  -1    0.80    2.60
   3  22  -1   -0.30    6.10
  -3 -22   1    5.70    2.20
  -3 -22   1    0.50    4.70
  -3 -22   1   -0.30    2.80
  -3 -22   1    3.10    3.70
  -3 -22   1   -2.10    2.80
   2  22  -1    1.10    2.80
   2  22  -1    6.10    6.20
   2  22  -1   -0.10    6.10
   2  22  -1    3.50    3.90
   2  22  -1    1.60    2.80
  -2 -22   1    9.20    4.00
  -2 -22   1    8.90    4.70
  -2 -22   1    5.20    2.20
  -2 -22   1   -4.20    2.40
  -2 -22   1    0.70    2.50
   1  22  -1    0.50    3.80
   1  22  -1   -0.50    6.10
   1  22  -1   -2.80    2.20
   1  22  -1    3.30    3.00
  -1 -22   1    2.50    2.10
  -1 -22   1   -5.30    4.80
  -1 -22   1    0.50    1.80
  -1 -22   1    7.40    3.40
   0  22  -1    1.90    3.40
   0  22  -1   -3.90    5.70
   0  22  -1   10.90    6.20
   0  22  -1  -13.60    6.10
   0 -22   1   11.00    3.50
   0 -22   1   -2.60    4.60
   0 -22   1    1.50    1.60
   0 -22   1    4.90    2.20
  -1  22  -1   -9.40    6.00
  -1  22  -1   -0.60    2.20
  -1  22  -1   -5.20    3.40
  -1  22  -1    0.90    5.50
  -1  22  -1    8.30    5.30
   1 -22   1    1.70    1.90
   1 -22   1  -11.90    4.40
   1 -22   1    6.70    3.60
   1 -22   1   -1.50    3.00
  -2  22  -1   -0.20    3.60
  -2  22  -1   -1.20    2.20
  -2  22  -1    8.70    6.60
  -2  22  -1    0.40    6.30
  -2  22  -1   -1.80    6.20
   2 -22   1   -1.50    1.30
   2 -22   1  -14.30    5.30
   2 -22   1    1.30    1.50
  -3  22  -1    4.60    2.60
  -3  22  -1   -0.80    3.10
  -3  22  -1    7.60    3.80
  -3  22  -1    3.10    1.30
   3 -22   1    1.20    1.20
   3 -22   1   -2.50    4.30
   3 -22   1    0.30    1.10
  -4  22  -1   -2.20    3.90
  -4  22  -1   -1.00    2.30
  -4  22  -1    2.90    3.80
  -4  22  -1    0.90    3.90
  -4  22  -1   -0.70    2.20
   4 -22   1   -4.40    4.10
   7  21  -1    3.90    3.80
   7  21  -1    0.10    2.90
   7  21  -1  -15.00    7.20
  -7 -21   1    7.70    5.70
  -7 -21   1   -1.90    4.60
  -7 -21   1    2.80    2.60
  -7 -21   1    1.30    3.00
  -7 -21   1    1.80    2.20
   6  21  -1    1.30    2.40
   6  21  -1    0.50    6.50
   6  21  -1    1.90    2.10
  -6 -21   1   -0.50    2.60
  -6 -21   1    0.00    3.40
  -6 -21   1   -3.30    4.50
  -6 -21   1    3.60    3.40
  -6 -21   1    3.30    2.00
   5  21  -1   -3.80    6.70
   5  21  -1    1.50    3.60
   5  21  -1   21.40    2.30
   5  21  -1   -4.40    7.10
  -5 -21   1   12.90    4.20
  -5 -21   1   -2.30    4.50
   4  21  -1    4.20    2.10
   4  21  -1   -2.70    3.80
   4  21  -1   -4.90    5.50
   4  21  -1    1.20    2.60
   4  21  -1   -2.90    6.00
  -4 -21   1   -1.60    4.30
  -4 -21   1    3.30    1.90
  -4 -21   1    2.60    3.60
  -4 -21   1    0.20    2.20
   3  21  -1    2.10    5.90
   3  21  -1    1.70    2.40
   3  21  -1    9.00    6.10
   3  21  -1    1.70    2.20
  -3 -21   1    5.80    2.20
  -3 -21   1   -0.40    2.10
  -3 -21   1    2.10    3.40
  -3 -21   1    2.10    4.80
  -3 -21   1    1.70    2.60
   2  21  -1    1.90    6.30
   2  21  -1   -0.60    3.00
   2  21  -1    2.30    3.90
   2  21  -1    4.10    2.70
   2  21  -1   10.10    6.10
  -2 -21   1    4.00    2.50
  -2 -21   1    7.90    2.60
  -2 -21   1   -1.80    1.90
  -2 -21   1    2.20    4.40
   1  21  -1   -5.90    5.40
   1  21  -1   -0.40    2.90
   1  21  -1    0.40    2.60
   1  21  -1    5.30    2.60
   1  21  -1  -12.90    6.00
  -1 -21   1    4.40    3.30
  -1 -21   1   -2.60    4.20
  -1 -21   1    8.30    2.40
  -1 -21   1    1.60    1.90
  -1 -21   1    1.70    2.30
   0  21  -1   -5.10    5.40
   0  21  -1   -0.50    2.40
   0  21  -1   -1.00    2.80
   0  21  -1    1.20    3.30
   0 -21   1   -3.70    4.60
   0 -21   1    6.10    2.30
   0 -21   1   -0.50    1.90
   0 -21   1    6.70    3.50
   0 -21   1   -0.10    2.20
  -1  21  -1    2.90    5.20
  -1  21  -1    2.30    2.40
  -1  21  -1   -0.20    3.50
  -1  21  -1    4.30    3.60
  -1  21  -1  -12.90    5.90
   1 -21   1    4.40    3.30
   1 -21   1    3.30    1.80
   1 -21   1   -9.80    4.40
  -3  21  -1    4.20    3.70
  -3  21  -1    2.80    4.70
  -3  21  -1    5.30    4.70
  -3  21  -1    0.00    2.00
  -3  21  -1    3.10    1.80
   3 -21   1    1.70    1.30
   3 -21   1    3.10    1.30
   3 -21   1    7.10    3.00
   3 -21   1   -9.60    4.50
  -4  21  -1    0.60    2.50
  -4  21  -1    5.10    2.10
  -4  21  -1   -1.90    3.80
  -4  21  -1    3.00    2.70
  -4  21  -1    0.00    3.10
  -4  21  -1    7.60    5.30
   4 -21   1   -2.30    4.20
  -5  21  -1   -1.30    2.10
  -5  21  -1   -0.30    2.30
  -5  21  -1   -1.70    3.80
  -5  21  -1   -1.80    3.30
  -5  21  -1    0.30    2.80
  -5  21  -1    2.30    5.10
   5 -21   1    4.10    4.30
  -6  21  -1   18.40    4.70
  -6  21  -1   14.70    5.40
  -7  21  -1   -4.40    3.00
  -7  21  -1    5.50    2.20
  -7  21  -1   16.90    4.50
  -7  21  -1    7.40    2.40
  -7  21  -1    4.60    3.80
  -7  21  -1    3.30    5.20
   7 -21   1    9.10    5.60
   9  20  -1   -4.60    1.90
   9  20  -1   -1.50    2.70
   9  20  -1    1.70    2.90
   9  20  -1  -11.60    7.20
  -9 -20   1    8.20    3.90
  -9 -20   1    2.90    3.20
  -9 -20   1    0.40    2.20
  -9 -20   1    3.50    4.80
   8  20  -1    7.20    4.00
   8  20  -1   20.50    7.20
   8  20  -1    5.80    2.80
   8  20  -1    6.20    6.40
   8  20  -1    3.50    2.90
  -8 -20   1    4.10    3.00
  -8 -20   1    6.50    2.20
  -8 -20   1    3.40    3.20
  -8 -20   1    5.30    5.00
   7  20  -1    3.00    2.70
   7  20  -1    1.50    3.30
   7  20  -1    4.00    6.50
   7  20  -1   -5.80    5.60
  -7 -20   1   -5.00    3.90
  -7 -20   1    0.20    2.00
  -7 -20   1    3.10    3.50
  -7 -20   1   -3.50    2.70
  -7 -20   1   16.60    7.60
   6  20  -1    4.50    6.50
   6  20  -1    1.90    2.60
   6  20  -1   -8.50    5.20
   6  20  -1    1.00    2.50
  -6 -20   1   -6.50    4.00
  -6 -20   1    3.30    2.80
  -6 -20   1   10.40    9.80
  -6 -20   1    0.70    3.20
   5  20  -1    3.90    2.70
   5  20  -1   -8.70    5.70
   5  20  -1    8.90    3.90
   5  20  -1    7.70    2.00
  -5 -20   1    2.70    2.10
  -5 -20   1    4.10    3.30
  -5 -20   1   -1.50    4.90
   4  20  -1    3.60    2.50
   4  20  -1    0.10    2.10
   4  20  -1    5.00    7.00
   4  20  -1    2.10    5.40
   4  20  -1   -0.90    3.10
  -4 -20   1    4.80    2.10
  -4 -20   1   -2.40    4.30
  -4 -20   1    4.10    3.00
  -4 -20   1    5.00    3.50
   3  20  -1    5.90    5.90
   3  20  -1   11.60    5.90
   3  20  -1    0.60    2.50
   3  20  -1    0.20    2.10
   3  20  -1    6.30    3.80
   3  20  -1    0.00    2.60
  -3 -20   1    5.50    2.50
  -3 -20   1    3.10    3.50
  -3 -20   1    0.20    2.10
  -3 -20   1   20.90    5.80
  -3 -20   1    3.80    2.60
  -3 -20   1    1.30    4.10
   2  20  -1    3.50    6.00
   2  20  -1    2.10    2.70
   2  20  -1    5.60    5.30
   2  20  -1    3.00    3.70
   2  20  -1   -3.70    2.50
   2  20  -1   -4.00    2.10
  -2 -20   1    1.20    2.20
  -2 -20   1    3.20    4.40
  -2 -20   1    5.20    2.50
  -2 -20   1   -1.10    1.80
  -2 -20   1    1.50    3.40
   1  20  -1    0.30    3.40
   1  20  -1   -2.10    2.90
   1  20  -1   -0.20    2.30
   1  20  -1   -9.20    5.60
   1  20  -1   -0.50    5.40
  -1 -20   1    2.30    1.90
  -1 -20   1    5.50    3.30
  -1 -20   1   -2.20    4.20
  -1 -20   1    2.80    1.80
  -1 -20   1    3.00    2.40
   0  20  -1   -4.70    3.20
   0  20  -1   -3.10    3.00
   0  20  -1   -1.40    2.10
   0  20  -1   -6.10    4.90
   0  20  -1  -10.40    5.60
   0  20  -1    0.90    2.40
   0 -20   1    7.90    3.50
   0 -20   1    0.50    2.30
   0 -20   1    2.90    1.80
   0 -20   1    2.50    1.80
   0 -20   1    0.70    4.70
  -1  20  -1  -11.70    5.20
  -1  20  -1    3.60    3.40
  -1  20  -1    5.60    5.30
  -1  20  -1    0.70    1.90
  -1  20  -1    0.90    3.30
   1 -20   1    0.00    4.40
   1 -20   1    0.50    1.60
   1 -20   1   -1.10    2.40
   1 -20   1   -0.30    1.60
   1 -20   1   -1.00    3.00
  -2  20  -1   10.40    6.40
  -2  20  -1    4.40    2.60
  -2  20  -1    2.50    1.40
  -2  20  -1   -4.00    5.60
  -2  20  -1    2.80    2.40
  -2  20  -1    0.80    3.20
  -2  20  -1    3.90    3.30
   2 -20   1   -0.40    1.60
   2 -20   1   -0.20    3.10
   2 -20   1   -7.00    4.00
   2 -20   1    0.70    1.40
  -3  20  -1    2.00    5.80
  -3  20  -1   20.20    2.20
  -3  20  -1   11.20    5.50
  -3  20  -1    7.70    3.20
  -4  20  -1    9.70    5.40
  -4  20  -1    1.30    3.10
  -6  20  -1   -0.20    1.90
  -6  20  -1    0.10    3.00
  -6  20  -1    8.80    4.70
  -6  20  -1   -0.90    2.70
  -6  20  -1    4.20    3.90
   6 -20   1   -4.40    3.50
  -7  20  -1    1.90    1.90
  -7  20  -1   11.30    5.50
  -7  20  -1    8.30    5.10
  -7  20  -1    0.40    3.00
  -7  20  -1    0.50    1.90
  -7  20  -1    5.40    3.70
  -7  20  -1   -1.00    3.30
   7 -20   1    3.60    3.90
  -8  20  -1    2.40    2.00
  -8  20  -1    2.90    2.20
  -8  20  -1    6.20    3.70
  -8  20  -1   -1.40    5.70
  -8  20  -1   -2.10    4.10
  -8  20  -1    1.60    2.70
  -8  20  -1    3.40    1.90
  -8  20  -1   15.90    5.60
   8 -20   1    2.50    2.40
   8 -20   1   -2.00    4.60
  -9  20  -1    4.70    2.90
  -9  20  -1    1.80    1.60
  -9  20  -1   10.30    5.20
  -9  20  -1   -6.80    3.30
  -9  20  -1    3.60    2.70
  -9  20  -1   11.40    5.20
  -9  20  -1    0.80    1.70
  -9  20  -1   -0.20    3.40
   9 -20   1   -0.40    2.70
   9 -20   1   -1.10    3.70
  11  19  -1   -1.60    3.70
  11  19  -1   16.30    6.90
  11  19  -1    8.00    3.40
  11  19  -1    9.20    4.00
 -11 -19   1    1.00    6.90
 -11 -19   1   10.90    4.40
 -11 -19   1   12.10    6.70
 -11 -19   1    4.50    2.70
 -11 -19   1   15.40    5.10
  10  19  -1    4.40    3.10
  10  19  -1    7.70    6.30
  10  19  -1   -2.10    3.60
  10  19  -1   -7.80    5.80
  10  19  -1    5.50    3.30
 -10 -19   1   12.40    5.10
 -10 -19   1    9.10    4.10
 -10 -19   1   -0.70    4.20
   9  19  -1    1.30    2.00
   9  19  -1    4.30    3.20
   9  19  -1    4.30    6.40
   9  19  -1  -11.70    6.50
   9  19  -1   -1.80    3.70
  -9 -19   1    7.60    3.60
  -9 -19   1    5.50    4.70
  -9 -19   1    7.70    3.40
  -9 -19   1    1.40    2.40
   8  19  -1    1.90    2.70
   8  19  -1   -1.30    2.50
   8  19  -1    3.50    4.40
   8  19  -1   -8.40    5.40
   8  19  -1   16.20    7.40
  -8 -19   1    4.00    3.20
  -8 -19   1    7.10    4.80
  -8 -19   1   -4.90    4.40
  -8 -19   1    7.00    2.40
   7  19  -1   -2.20    3.20
   7  19  -1   -3.80    5.50
   7  19  -1    0.30    2.70
  -7 -19   1  -10.10    5.20
  -7 -19   1    0.40    2.50
  -7 -19   1    0.00    4.30
  -7 -19   1   -4.20    3.30
  -7 -19   1    1.60    2.60
   6  19  -1    1.20    2.50
   6  19  -1    3.40    6.30
   6  19  -1    1.40    2.90
   6  19  -1   -3.70    5.60
   6  19  -1   -1.10    2.10
  -6 -19   1   -1.10    2.30
  -6 -19   1    5.00    3.60
  -6 -19   1    0.40    2.20
  -6 -19   1   -3.00    2.50
  -6 -19   1   -1.20    4.00
  -6 -19   1   15.90    5.90
   5  19  -1    3.70    5.50
   5  19  -1   -2.90    2.40
   5  19  -1    0.70    3.40
   5  19  -1   -7.00    6.10
   5  19  -1    3.40    2.00
  -5 -19   1   -0.40    3.20
  -5 -19   1   -1.10    2.20
  -5 -19   1   16.00    5.60
  -5 -19   1    4.40    2.40
  -5 -19   1    2.30    2.20
  -5 -19   1    2.90    4.20
   4  19  -1   -1.30    2.20
   4  19  -1    1.80    3.30
   4  19  -1   -2.30    5.20
   4  19  -1   -0.10    2.10
   4  19  -1    0.70    6.10
  -4 -19   1    4.10    2.50
  -4 -19   1    4.00    4.50
  -4 -19   1    1.40    2.30
  -4 -19   1    6.50    3.80
  -4 -19   1    1.20    5.20
  -4 -19   1    4.40    2.10
   3  19  -1   -5.60    3.10
   3  19  -1    3.90    5.20
   3  19  -1   -4.70    2.00
   3  19  -1    1.70    2.20
   3  19  -1    1.90    2.40
   3  19  -1    6.20    5.80
  -3 -19   1    0.40    5.00
  -3 -19   1    1.80    2.50
  -3 -19   1    3.70    2.10
  -3 -19   1   -0.20    2.20
   2  19  -1    4.30    5.40
   2  19  -1    0.40    2.30
   2  19  -1   -1.20    2.60
   2  19  -1    2.60    5.50
   2  19  -1    2.00    2.40
   2  19  -1    2.50    3.50
  -2 -19   1    0.30    2.50
  -2 -19   1   -0.60    2.50
  -2 -19   1    1.00    3.80
  -2 -19   1   16.90    5.80
  -2 -19   1    1.90    2.00
   1  19  -1   -0.80    3.30
   1  19  -1    2.40    2.30
   1  19  -1   -8.50    4.90
   1  19  -1   -2.10    2.90
   1  19  -1   -3.70    2.00
   1  19  -1   -6.00    5.40
  -1 -19   1    3.30    2.10
  -1 -19   1    3.40    3.40
  -1 -19   1    0.90    2.40
  -1 -19   1   -3.60    3.90
  -1 -19   1   10.30    5.30
  -1 -19   1   -1.70    1.80
   0  19  -1   -0.30    2.60
   0  19  -1   -0.60    2.10
   0  19  -1    3.10    3.40
   0  19  -1   -7.50    5.10
   0  19  -1   -0.40    2.20
   0  19  -1    1.20    5.20
   0 -19   1    1.30    3.10
   0 -19   1    1.50    2.00
   0 -19   1   -0.40    2.00
   0 -19   1  -10.10    3.80
   0 -19   1    2.20    2.00
  -1  19  -1    0.90    1.90
  -1  19  -1   -2.40    4.80
  -1  19  -1    2.00    3.20
  -1  19  -1   -6.30    4.80
  -1  19  -1    1.60    2.20
  -1  19  -1    2.80    2.80
   1 -19   1    1.30    1.80
   1 -19   1    4.00    3.00
   1 -19   1    0.30    1.40
   1 -19   1   -7.50    4.20
   1 -19   1    0.10    2.50
  -2  19  -1   -1.20    1.50
  -2  19  -1   -0.10    2.20
  -2  19  -1   -3.70    5.00
  -2  19  -1    1.50    2.90
  -2  19  -1   -3.50    4.50
  -2  19  -1    1.10    1.90
  -2  19  -1    0.50    3.30
   2 -19   1   -5.30    3.80
   2 -19   1    0.00    1.50
   2 -19   1    1.10    1.70
   2 -19   1    0.40    2.60
  -3  19  -1   -0.80    1.80
  -3  19  -1    0.90    1.90
  -3  19  -1    2.90    3.30
  -3  19  -1    0.10    3.50
  -3  19  -1    6.90    5.00
  -3  19  -1   -8.30    5.10
   3 -19   1   -1.60    3.80
   3 -19   1    0.30    1.30
   3 -19   1    5.50    1.40
   3 -19   1   -0.40    3.20
  -4  19  -1    2.10    5.70
  -4  19  -1    1.20    3.90
  -4  19  -1   10.60    2.70
  -4  19  -1   10.60    2.30
  -4  19  -1    5.80    3.00
  -4  19  -1    8.30    3.70
  -4  19  -1    7.20    5.40
   4 -19   1    1.30    4.40
   4 -19   1   12.90    3.60
   4 -19   1    6.40    1.20
  -5  19  -1    5.10    4.90
  -6  19  -1    4.00    2.20
  -6  19  -1    6.60    4.40
  -6  19  -1    1.90    1.60
  -6  19  -1   -0.50    3.10
  -6  19  -1    7.00    4.90
  -6  19  -1    2.10    2.80
  -6  19  -1   11.50    4.30
   6 -19   1   -3.40    3.90
  -7  19  -1    7.20    2.00
  -7  19  -1    2.80    1.90
  -7  19  -1    3.80    5.00
  -7  19  -1    5.80    3.10
  -7  19  -1    2.20    3.40
  -7  19  -1    6.60    2.10
  -7  19  -1    7.50    4.90
  -7  19  -1   13.00    4.10
   7 -19   1    1.00    3.70
   7 -19   1    6.70    2.30
  -8  19  -1    1.60    3.30
  -8  19  -1    4.70    3.70
  -8  19  -1   13.70    5.00
  -9  19  -1    6.20    3.10
  -9  19  -1    6.50    1.90
  -9  19  -1    9.70    3.60
  -9  19  -1    2.30    3.80
  -9  19  -1   20.30    6.10
   9 -19   1    5.40    3.70
   9 -19   1    6.30    2.90
 -10  19  -1   19.10    4.90
 -11  19  -1   -3.50    3.00
 -11  19  -1   -2.70    3.80
 -11  19  -1   17.50    5.30
 -11  19  -1    2.10    1.70
 -11  19  -1    2.10    2.90
 -11  19  -1   -0.20    1.50
  11 -19   1    1.80    3.10
  12  18  -1    7.80    4.40
  12  18  -1   10.10    3.30
  12  18  -1   14.20    6.30
  12  18  -1    1.90    3.00
 -12 -18   1   11.10    3.40
 -12 -18   1   11.20    4.20
 -12 -18   1    7.60    2.80
 -12 -18   1   13.10    4.80
 -12 -18   1   24.70    4.60
 -12 -18   1   10.20    3.40
  11  18  -1    3.50    3.00
  11  18  -1   -3.00    3.40
  11  18  -1    0.60    2.50
  11  18  -1    4.30    6.20
  11  18  -1    3.30    5.90
 -11 -18   1    2.50    3.00
 -11 -18   1    1.50    2.40
 -11 -18   1    5.70    3.90
 -11 -18   1    9.40    4.00
 -11 -18   1    6.30    4.20
  10  18  -1    8.60    6.40
  10  18  -1   10.80    3.00
  10  18  -1    6.50    2.90
  10  18  -1    1.50    6.10
 -10 -18   1   16.00    5.10
 -10 -18   1   13.80    4.50
 -10 -18   1   10.40    2.70
 -10 -18   1    9.50    4.10
   9  18  -1    4.00    3.10
   9  18  -1   -4.10    4.90
   9  18  -1    0.10    3.20
   9  18  -1   -1.00    2.60
  -9 -18   1    2.20    2.40
  -9 -18   1   -5.20    2.90
  -9 -18   1   -1.60    2.60
  -9 -18   1   -3.60    4.20
  -9 -18   1    1.70    3.10
   8  18  -1    1.40    5.20
   8  18  -1   -2.90    2.40
   8  18  -1    1.50    3.30
   8  18  -1    3.70    2.90
   8  18  -1    2.80    5.90
  -8 -18   1    1.80    1.90
  -8 -18   1    0.00    2.20
  -8 -18   1    3.10    4.50
  -8 -18   1   -2.30    2.70
   7  18  -1    1.60    3.50
   7  18  -1    3.70    5.90
   7  18  -1    9.20    2.00
   7  18  -1    2.40    2.70
   7  18  -1    4.20    5.60
  -7 -18   1    3.00    4.00
  -7 -18   1    8.40    3.80
  -7 -18   1    2.80    2.10
  -7 -18   1    5.50    2.80
   6  18  -1    3.30    2.70
   6  18  -1    1.90    5.80
   6  18  -1   -0.30    5.40
   6  18  -1   -3.50    2.00
   6  18  -1   -0.80    2.90
   6  18  -1    3.20    2.00
  -6 -18   1    7.20    3.40
  -6 -18   1    5.10    4.40
  -6 -18   1   -3.00    1.90
  -6 -18   1   -6.50    5.30
  -6 -18   1    0.20    2.50
   5  18  -1   -2.20    6.10
   5  18  -1   -0.30    3.30
   5  18  -1   -0.60    1.80
   5  18  -1    4.90    2.50
   5  18  -1    1.90    5.50
  -5 -18   1    0.00    2.20
  -5 -18   1    8.20    5.20
  -5 -18   1    0.50    1.90
  -5 -18   1   -3.90    2.30
  -5 -18   1    8.30    3.60
  -5 -18   1    0.00    3.90
   4  18  -1    3.10    2.50
   4  18  -1    4.30    6.10
   4  18  -1   -2.40    5.20
   4  18  -1   -1.70    2.20
   4  18  -1   -3.70    2.00
  -4 -18   1    4.70    3.00
  -4 -18   1   -2.20    3.20
  -4 -18   1    1.50    4.80
  -4 -18   1    3.50    2.40
  -4 -18   1   -0.30    2.00
  -4 -18   1    0.10    3.90
   3  18  -1   -0.30    2.20
   3  18  -1   -5.00    4.90
   3  18  -1    0.30    5.60
   3  18  -1   -5.10    2.30
   3  18  -1    3.30    2.40
   3  18  -1    2.40    3.40
  -3 -18   1    0.40    2.10
  -3 -18   1    0.20    3.40
  -3 -18   1    4.30    3.90
  -3 -18   1   -7.00    4.50
  -3 -18   1    2.30    2.20
   2  18  -1   -0.30    5.00
   2  18  -1   -1.40    2.20
   2  18  -1    0.50    3.30
   2  18  -1    2.30    3.40
   2  18  -1   -4.80    2.10
   2  18  -1    1.70    5.50
  -2 -18   1    0.90    3.10
  -2 -18   1    8.00    5.50
  -2 -18   1    4.10    4.00
  -2 -18   1    0.80    1.90
  -2 -18   1    2.20    2.30
   1  18  -1    0.20    5.10
   1  18  -1   -6.20    5.60
   1  18  -1   -0.90    3.30
   1  18  -1    0.40    2.30
   1  18  -1    1.00    2.30
   1  18  -1    2.00    3.20
  -1 -18   1    8.40    4.30
  -1 -18   1    1.30    5.30
  -1 -18   1    4.10    2.20
  -1 -18   1    4.00    2.40
  -1 -18   1    4.10    3.60
   0  18  -1    1.10    5.20
   0  18  -1    2.30    2.30
   0  18  -1    4.60    2.30
   0  18  -1    6.60    3.60
   0  18  -1    3.00    3.40
   0  18  -1   12.60    5.90
   0 -18   1    3.80    3.30
   0 -18   1   -1.10    2.10
   0 -18   1    4.50    2.60
   0 -18   1    5.10    4.20
   0 -18   1    9.20    2.30
   0 -18   1    5.20    5.00
  -1  18  -1    0.60    5.10
  -1  18  -1    3.20    1.20
  -1  18  -1    7.20    3.40
  -1  18  -1    7.50    2.30
  -1  18  -1    4.30    5.00
  -1  18  -1    6.40    2.10
  -1  18  -1    8.40    3.60
   1 -18   1   -3.40    3.70
   1 -18   1    3.20    1.90
   1 -18   1    1.20    1.70
   1 -18   1    6.60    2.50
   1 -18   1    4.30    2.80
  -2  18  -1    3.30    1.90
  -2  18  -1   -1.90    1.70
  -2  18  -1    0.00    4.60
  -2  18  -1   -0.10    1.90
  -2  18  -1    0.50    2.90
  -2  18  -1   -3.90    2.70
  -2  18  -1   -8.80    4.60
   2 -18   1   -1.80    1.40
   2 -18   1    0.60    2.80
   2 -18   1   -4.10    3.80
   2 -18   1    2.70    2.80
   2 -18   1   -1.50    1.50
  -3  18  -1    7.10    3.70
  -3  18  -1    8.30    3.70
  -3  18  -1    6.00    5.70
  -3  18  -1   13.90    2.40
  -3  18  -1   11.10    5.10
  -3  18  -1   12.40    2.50
   3 -18   1    7.40    3.30
   3 -18   1    9.90    1.60
   3 -18   1    6.80    4.30
   3 -18   1    8.50    1.70
  -4  18  -1   13.00    5.20
  -4  18  -1    1.30    3.40
  -4  18  -1    2.50    2.60
  -4  18  -1    0.70    5.50
   4 -18   1    1.50    3.20
   4 -18   1   10.90    3.90
  -5  18  -1   13.70    6.80
  -5  18  -1   13.60    1.50
  -5  18  -1   15.60    4.00
  -5  18  -1   18.80    2.90
  -5  18  -1   14.40    3.80
  -5  18  -1   16.10    3.50
  -5  18  -1   16.10    2.80
   5 -18   1   20.70    4.80
  -6  18  -1    1.70    3.10
  -6  18  -1    4.10    4.80
  -6  18  -1    0.00    1.90
  -6  18  -1    6.80    4.90
  -6  18  -1   -1.30    3.50
  -6  18  -1   -2.70    1.80
  -6  18  -1   -4.20    2.80
   6 -18   1    1.60    2.20
   6 -18   1   -1.90    3.70
  -7  18  -1   12.30    4.80
  -7  18  -1    3.70    1.90
  -7  18  -1    1.60    3.00
  -7  18  -1    5.60    5.10
  -7  18  -1    2.80    3.20
  -7  18  -1   12.00    3.90
  -7  18  -1    1.00    1.80
   7 -18   1   11.60    4.50
   7 -18   1    4.40    2.30
  -8  18  -1    2.90    3.20
  -8  18  -1    2.30    4.20
  -8  18  -1    2.80    1.70
  -8  18  -1    4.20    4.00
  -8  18  -1   10.80    5.00
  -8  18  -1    5.00    2.60
   8 -18   1    5.00    2.60
   8 -18   1    7.40    3.60
  -9  18  -1   11.90    5.30
  -9  18  -1    7.10    1.80
  -9  18  -1   17.50    5.10
  -9  18  -1    6.20    3.80
  -9  18  -1    7.10    3.20
  -9  18  -1   10.90    2.10
   9 -18   1   12.70    3.70
   9 -18   1    7.60    3.00
 -10  18  -1    7.50    3.40
 -10  18  -1   28.00    5.60
 -10  18  -1    8.50    4.70
 -10  18  -1    6.00    5.30
  10 -18   1   16.20    3.70
  10 -18   1    7.20    3.30
 -11  18  -1   -0.30    3.70
 -11  18  -1    6.00    3.90
 -11  18  -1    7.40    2.80
  11 -18   1    7.30    3.40
  11 -18   1    7.50    4.60
 -12  18  -1    9.00    3.40
 -12  18  -1    2.70    3.00
 -12  18  -1   -2.10    4.00
 -12  18  -1   18.40    5.30
 -12  18  -1    2.60    1.50
 -12  18  -1    0.90    1.50
 -12  18  -1    2.20    2.90
  12 -18   1   -4.20    3.50
  12 -18   1    3.50    3.10
  13  17  -1   11.10    6.10
  13  17  -1    5.20    1.80
  13  17  -1    3.60    3.00
  13  17  -1    1.10    5.60
  13  17  -1   10.80    3.80
  13  17  -1    6.80    4.00
 -13 -17   1    8.30    4.80
 -13 -17   1    2.40    3.40
 -13 -17   1   13.90    3.10
 -13 -17   1    3.50    3.90
 -13 -17   1    8.20    3.30
  12  17  -1   -2.90    5.20
  12  17  -1    4.40    3.50
  12  17  -1   -3.60    4.10
  12  17  -1    6.40    5.40
  12  17  -1   -1.70    2.90
 -12 -17   1    8.80    3.70
 -12 -17   1    3.00    2.90
 -12 -17   1    0.40    2.50
 -12 -17   1    4.70    3.80
 -12 -17   1    4.50    2.90
 -12 -17   1   12.50    4.80
  11  17  -1    0.90    2.70
  11  17  -1    1.00    5.30
  11  17  -1    3.50    3.10
  11  17  -1    0.00    2.80
 -11 -17   1   10.60    4.10
 -11 -17   1    6.40    4.10
 -11 -17   1    0.10    2.60
 -11 -17   1   -1.10    2.30
 -11 -17   1    6.30    2.70
  10  17  -1    1.20    2.80
  10  17  -1    4.60    2.80
  10  17  -1   -8.20    6.10
  10  17  -1    2.90    2.80
  10  17  -1    5.20    5.40
 -10 -17   1    5.60    2.50
 -10 -17   1    6.70    3.20
 -10 -17   1    6.60    3.60
 -10 -17   1   16.60    4.80
 -10 -17   1    5.00    2.50
 -10 -17   1    7.20    3.70
   9  17  -1    2.30    2.50
   9  17  -1    0.00    5.30
   9  17  -1    7.90    5.60
   9  17  -1    2.60    2.50
   9  17  -1    9.70    3.10
  -9 -17   1    8.50    4.70
  -9 -17   1   -0.90    2.20
  -9 -17   1    2.40    3.10
  -9 -17   1    4.40    1.70
  -9 -17   1    5.30    2.80
   8  17  -1    1.40    2.90
   8  17  -1    5.60    5.80
   8  17  -1    4.00    2.60
   8  17  -1    3.20    2.80
   8  17  -1   11.50    2.10
   8  17  -1    1.30    6.30
  -8 -17   1    7.60    3.20
  -8 -17   1    8.10    4.40
  -8 -17   1    7.20    3.50
  -8 -17   1    0.90    2.20
  -8 -17   1    5.10    3.10
   7  17  -1    0.40    2.60
   7  17  -1   -1.70    5.60
   7  17  -1    3.20    2.70
   7  17  -1    3.90    1.80
   7  17  -1    5.20    5.80
  -7 -17   1    0.40    4.00
  -7 -17   1   -3.30    2.80
  -7 -17   1    3.20    2.90
  -7 -17   1    1.40    2.80
  -7 -17   1    0.20    2.30
   6  17  -1    4.60    3.20
   6  17  -1    3.80    2.70
   6  17  -1    7.70    2.30
   6  17  -1   -0.30    5.30
   6  17  -1    5.50    2.90
   6  17  -1   10.00    6.30
  -6 -17   1    5.50    3.70
  -6 -17   1    2.50    4.20
  -6 -17   1    1.30    2.10
  -6 -17   1    4.80    2.70
  -6 -17   1    2.70    5.50
  -6 -17   1    6.70    3.00
   5  17  -1    3.30    2.50
   5  17  -1    3.40    5.90
   5  17  -1    2.00    3.30
   5  17  -1    0.70    5.40
   5  17  -1    6.50    2.80
   5  17  -1    3.00    2.30
  -5 -17   1    2.70    3.70
  -5 -17   1    1.80    3.20
  -5 -17   1   -2.90    2.10
  -5 -17   1    4.70    4.20
  -5 -17   1    4.50    2.20
  -5 -17   1   -3.50    3.60
   4  17  -1    3.70    5.10
   4  17  -1   -3.00    3.20
   4  17  -1   -4.20    2.00
   4  17  -1    2.10    2.40
   4  17  -1    2.40    5.60
   4  17  -1    1.20    2.10
  -4 -17   1    0.10    2.00
  -4 -17   1    1.80    3.60
  -4 -17   1    1.20    2.20
  -4 -17   1    2.20    4.90
  -4 -17   1    1.10    2.20
   3  17  -1   -2.30    2.10
   3  17  -1   -2.40    4.90
   3  17  -1   -0.10    3.10
   3  17  -1    1.70    5.40
   3  17  -1    0.60    2.30
   3  17  -1   -0.50    2.40
  -3 -17   1    3.90    4.90
  -3 -17   1   -1.50    2.30
  -3 -17   1   -3.30    2.00
  -3 -17   1    1.60    3.60
  -3 -17   1    0.80    2.00
  -3 -17   1    1.80    3.20
   2  17  -1    1.60    2.10
   2  17  -1   -0.10    2.70
   2  17  -1   -2.80    5.60
   2  17  -1    0.20    2.10
   2  17  -1    6.10    5.60
   2  17  -1   -0.80    3.10
  -2 -17   1   -4.40    4.70
  -2 -17   1    3.70    3.20
  -2 -17   1   -0.60    2.20
  -2 -17   1    0.30    1.90
  -2 -17   1    2.20    3.50
   1  17  -1    6.20    3.50
   1  17  -1   10.80    3.40
   1  17  -1    8.40    5.10
   1  17  -1    1.30    5.50
   1  17  -1   10.10    3.10
   1  17  -1    6.60    2.50
  -1 -17   1    5.20    2.20
  -1 -17   1   10.70    2.40
  -1 -17   1    5.60    4.00
  -1 -17   1    6.10    2.30
  -1 -17   1   16.90    5.80
  -1 -17   1    3.20    3.20
   0  17  -1   30.60    4.80
   0  17  -1   26.80    6.40
   0  17  -1   24.60    3.30
   0  17  -1   24.30    3.30
   0  17  -1   34.90    6.80
   0  17  -1   24.80    4.20
   0 -17   1   30.70    3.40
   0 -17   1   32.50    4.70
   0 -17   1   34.30    5.40
   0 -17   1   32.40    6.50
   0 -17   1   23.60    2.70
   0 -17   1   24.30    3.50
  -1  17  -1    6.80    3.60
  -1  17  -1    3.50    2.10
  -1  17  -1    4.60    2.30
  -1  17  -1   -1.50    4.70
  -1  17  -1    3.40    5.00
  -1  17  -1    2.20    2.30
  -1  17  -1    2.90    1.70
   1 -17   1    4.00    2.00
   1 -17   1    1.50    1.90
   1 -17   1    1.30    3.20
   1 -17   1    1.10    3.70
   1 -17   1    2.30    2.70
  -2  17  -1    3.80    5.20
  -2  17  -1    5.30    3.40
  -2  17  -1   10.30    2.30
  -2  17  -1    9.60    5.10
  -2  17  -1   11.90    2.40
  -2  17  -1    5.70    3.70
   2 -17   1    9.80    2.50
   2 -17   1   11.70    2.00
   2 -17   1   14.40    4.30
   2 -17   1   10.50    3.50
   2 -17   1   11.70    1.90
  -3  17  -1   -2.60    4.90
  -3  17  -1   -0.10    4.90
  -3  17  -1   -1.00    1.60
  -3  17  -1    0.10    4.60
  -3  17  -1   -3.00    2.90
  -3  17  -1    3.70    3.10
   3 -17   1    1.60    1.20
   3 -17   1    6.10    3.90
   3 -17   1    3.60    1.50
   3 -17   1    2.50    3.10
   3 -17   1    2.80    2.80
  -4  17  -1   26.50    6.00
  -4  17  -1   29.30    3.30
  -4  17  -1   22.60    2.70
  -4  17  -1   22.80    5.80
  -4  17  -1   28.90    4.70
  -4  17  -1   21.90    3.30
  -4  17  -1   29.40    5.70
   4 -17   1   25.50    2.10
   4 -17   1   22.60    4.00
   4 -17   1   24.70    1.90
   4 -17   1   33.10    5.10
  -5  17  -1    1.10    3.80
  -5  17  -1    4.80    3.20
  -5  17  -1   -1.40    1.50
  -5  17  -1    2.30    3.30
  -5  17  -1    3.60    4.90
  -5  17  -1    1.20    2.10
  -5  17  -1    9.50    5.10
   5 -17   1    1.00    3.50
   5 -17   1    1.00    0.70
  -6  17  -1   34.60    3.20
  -6  17  -1   39.70    5.00
  -6  17  -1   40.20    6.80
  -6  17  -1   33.00    3.30
  -6  17  -1   30.90    4.30
  -6  17  -1   31.30    4.80
  -6  17  -1   38.60    6.60
  -6  17  -1   30.10    3.00
   6 -17   1   43.30    5.40
   6 -17   1   38.60    3.60
  -7  17  -1    2.00    1.70
  -7  17  -1   -0.90    2.90
  -7  17  -1    1.50    2.20
  -7  17  -1    0.70    2.60
  -7  17  -1    6.60    4.60
  -7  17  -1    3.70    2.70
  -7  17  -1    1.90    1.60
   7 -17   1   -0.60    2.00
   7 -17   1   -4.70    3.20
  -8  17  -1    1.10    3.20
  -8  17  -1    1.90    2.40
  -8  17  -1   10.20    4.30
   8 -17   1    1.90    2.40
  -9  17  -1    6.20    2.70
  -9  17  -1    3.70    1.80
  -9  17  -1    4.50    1.50
  -9  17  -1    4.80    3.20
  -9  17  -1   -0.40    3.40
  -9  17  -1    5.90    2.50
   9 -17   1    7.90    4.10
   9 -17   1    7.00    3.00
 -10  17  -1   20.30    3.60
 -10  17  -1    7.60    3.80
  10 -17   1   10.90    3.60
 -11  17  -1    5.70    1.60
 -11  17  -1    6.20    3.40
 -11  17  -1   -3.60    3.10
 -11  17  -1    1.30    1.50
  11 -17   1    3.30    3.10
  11 -17   1    4.40    4.80
 -12  17  -1   29.80    6.70
 -13  17  -1    3.30    1.60
 -13  17  -1    4.90    4.50
 -13  17  -1    4.40    2.50
 -13  17  -1    7.20    2.60
 -13  17  -1    6.10    1.70
 -13  17  -1   21.10    5.10
 -13  17  -1    1.40    4.30
  13 -17   1    5.80    4.40
  13 -17   1    7.40    3.00
  14  16  -1    2.30    3.80
  14  16  -1    4.00    5.60
  14  16  -1    9.70    2.80
  14  16  -1   16.90    4.30
  14  16  -1    9.40    3.60
  14  16  -1    6.00    5.90
 -14 -16   1    8.30    5.00
 -14 -16   1   13.80    3.90
 -14 -16   1   19.80    4.30
 -14 -16   1   12.50    3.80
 -14 -16   1   10.30    2.50
 -14 -16   1   15.00    3.80
 -14 -16   1   14.20    4.20
 -14 -16   1    2.90    2.90
  13  16  -1   -1.60    3.40
  13  16  -1   -0.70    2.00
  13  16  -1    2.00    5.00
  13  16  -1   -0.70    2.70
  13  16  -1    9.90    3.30
  13  16  -1   -3.70    4.80
 -13 -16   1    2.10    1.60
 -13 -16   1    0.90    3.10
 -13 -16   1    1.40    3.80
 -13 -16   1    1.10    3.80
 -13 -16   1   -1.30    3.90
 -13 -16   1    3.50    3.10
  12  16  -1    0.10    3.70
  12  16  -1   13.40    5.50
  12  16  -1    5.80    1.90
  12  16  -1    2.70    3.10
  12  16  -1    9.10    3.60
 -12 -16   1    3.60    3.60
 -12 -16   1    8.60    4.50
 -12 -16   1    8.30    3.60
 -12 -16   1    8.60    3.30
 -12 -16   1    5.50    3.10
 -12 -16   1   10.40    3.50
  11  16  -1   -3.20    2.30
  11  16  -1   -3.70    4.60
  11  16  -1    6.20    3.10
  11  16  -1    6.60    4.00
 -11 -16   1   -2.70    2.90
 -11 -16   1   -2.20    2.40
 -11 -16   1    0.10    3.40
 -11 -16   1    5.30    3.30
 -11 -16   1   -2.20    2.60
 -11 -16   1    5.70    4.00
  10  16  -1    2.50    2.60
  10  16  -1    8.10    5.70
  10  16  -1    5.50    3.00
  10  16  -1    3.30    3.70
  10  16  -1   -1.60    5.10
 -10 -16   1    6.40    4.40
 -10 -16   1    1.10    2.50
 -10 -16   1    4.30    3.10
 -10 -16   1    7.20    2.40
 -10 -16   1    8.10    4.20
   9  16  -1    1.50    5.20
   9  16  -1    2.30    5.50
   9  16  -1    5.80    2.90
   9  16  -1    5.00    3.00
   9  16  -1    6.00    1.90
   9  16  -1    2.00    3.10
  -9 -16   1    2.00    2.20
  -9 -16   1    1.20    2.40
  -9 -16   1    6.30    4.70
  -9 -16   1    7.00    4.20
  -9 -16   1    6.40    4.10
  -9 -16   1    4.00    3.40
   8  16  -1   -1.90    5.10
   8  16  -1    2.60    3.30
   8  16  -1   -0.60    2.60
   8  16  -1   -2.50    2.50
   8  16  -1   -3.50    5.70
   8  16  -1    0.90    1.70
  -8 -16   1   -1.90    2.60
  -8 -16   1    5.10    1.50
  -8 -16   1   -1.70    3.40
  -8 -16   1    4.10    2.80
  -8 -16   1    0.60    2.30
  -8 -16   1    6.50    5.80
  -8 -16   1   -1.00    4.00
   7  16  -1    1.90    2.80
   7  16  -1    1.50    1.80
   7  16  -1    1.40    3.50
   7  16  -1   10.00    6.20
   7  16  -1    3.10    5.50
   7  16  -1    3.60    3.40
  -7 -16   1    2.50    4.40
  -7 -16   1    3.30    2.30
  -7 -16   1    2.40    3.60
  -7 -16   1    4.00    3.10
  -7 -16   1    1.50    2.70
   6  16  -1    3.50    3.30
   6  16  -1   -1.90    2.40
   6  16  -1   -0.80    5.50
   6  16  -1   -0.40    3.20
   6  16  -1    0.70    1.90
   6  16  -1    3.50    6.50
  -6 -16   1    1.80    2.10
  -6 -16   1    0.30    4.10
  -6 -16   1    1.70    2.80
  -6 -16   1   -0.20    2.70
  -6 -16   1    3.80    3.60
   5  16  -1   11.40    3.60
   5  16  -1    9.60    3.00
   5  16  -1    3.00    5.90
   5  16  -1    9.30    2.50
  -5 -16   1    6.20    3.50
  -5 -16   1   18.50    5.90
  -5 -16   1    6.80    2.30
  -5 -16   1    8.50    4.20
  -5 -16   1    7.60    2.80
   4  16  -1    1.70    2.30
   4  16  -1    0.20    5.70
   4  16  -1   -0.60    5.40
   4  16  -1   -0.30    2.60
   4  16  -1   -4.00    2.00
   4  16  -1   -0.50    2.10
  -4 -16   1   -3.40    2.00
  -4 -16   1   -1.30    2.90
  -4 -16   1   -0.50    1.90
  -4 -16   1    1.30    3.80
  -4 -16   1    1.70    4.70
  -4 -16   1    0.50    2.80
   3  16  -1   -3.80    2.60
   3  16  -1   -1.60    2.30
   3  16  -1   -0.30    2.60
   3  16  -1   -5.10    4.40
   3  16  -1   -0.70    5.10
   3  16  -1   -4.50    1.80
  -3 -16   1    2.70    3.50
  -3 -16   1    2.00    2.10
  -3 -16   1   -0.40    1.90
  -3 -16   1   -1.60    3.50
  -3 -16   1   -3.40    2.30
  -3 -16   1   -3.00    2.60
   2  16  -1    3.80    2.80
   2  16  -1    5.70    4.80
   2  16  -1    0.90    5.30
   2  16  -1    6.90    2.90
   2  16  -1    3.20    2.30
   2  16  -1   12.60    3.50
  -2 -16   1    5.70    2.10
  -2 -16   1   14.60    3.40
  -2 -16   1    6.10    4.80
  -2 -16   1    3.70    2.00
  -2 -16   1    5.70    3.80
  -2 -16   1    3.20    2.20
   1  16  -1    1.50    2.10
   1  16  -1   -3.70    4.30
   1  16  -1    0.90    2.90
   1  16  -1    3.50    5.10
   1  16  -1   -0.30    2.00
   1  16  -1    4.80    3.90
  -1 -16   1   -0.70    2.10
  -1 -16   1   -1.10    3.60
  -1 -16   1    0.20    4.50
  -1 -16   1   -2.30    2.80
  -1 -16   1   -0.30    1.80
   0  16  -1    2.20    1.00
   0  16  -1    4.80    4.70
   0  16  -1   -3.70    3.10
   0  16  -1    2.20    2.20
   0  16  -1    2.80    2.00
   0  16  -1    1.80    4.90
   0  16  -1    2.60    4.20
   0  16  -1    1.70    0.90
   0 -16   1    3.30    4.90
   0 -16   1    1.10    2.60
   0 -16   1   -1.90    3.70
   0 -16   1    2.80    2.20
   0 -16   1    0.40    3.10
  -1  16  -1   19.00    4.10
  -1  16  -1   14.30    2.60
  -1  16  -1   15.40    5.60
  -1  16  -1   17.60    2.70
  -1  16  -1   15.90    2.20
  -1  16  -1   20.90    5.70
  -1  16  -1   16.40    3.80
   1 -16   1   18.90    2.50
   1 -16   1   11.20    4.00
   1 -16   1   17.20    5.60
   1 -16   1   19.20    3.30
   1 -16   1   15.50    2.40
  -2  16  -1   -0.90    2.10
  -2  16  -1   -1.50    2.60
  -2  16  -1   -1.00    2.70
  -2  16  -1    1.70    4.90
  -2  16  -1    8.10    4.90
  -2  16  -1   -0.80    1.70
  -2  16  -1    0.80    1.80
   2 -16   1   -3.10    1.40
   2 -16   1   -0.20    2.10
   2 -16   1   -0.40    1.50
  -3  16  -1   -1.90    2.80
  -3  16  -1    0.20    2.00
  -3  16  -1    1.50    2.70
  -3  16  -1    1.60    4.50
  -3  16  -1   -2.10    4.90
  -3  16  -1   -1.30    2.10
  -3  16  -1    3.80    3.30
   3 -16   1    0.70    2.20
   3 -16   1    3.10    1.40
   3 -16   1    6.20    4.80
   3 -16   1    0.70    1.30
   3 -16   1    1.40    2.80
  -4  16  -1    1.40    2.80
  -4  16  -1   -1.60    1.90
  -4  16  -1   -3.50    3.10
  -4  16  -1   -3.70    2.40
  -4  16  -1   -0.20    1.30
  -4  16  -1   -3.50    2.70
  -4  16  -1   11.40    4.80
  -4  16  -1   -1.00    1.80
   4 -16   1   -1.00    1.00
   4 -16   1   -0.60    1.20
   4 -16   1    0.40    3.30
   4 -16   1    2.50    2.70
  -5  16  -1   32.00    4.10
  -5  16  -1   35.10    3.30
  -5  16  -1   29.90    6.20
  -5  16  -1   51.09    7.40
  -5  16  -1   38.60    3.40
  -5  16  -1   33.10    4.50
  -5  16  -1   51.19    7.50
  -5  16  -1   41.00    4.50
   5 -16   1   35.10    1.60
   5 -16   1   30.30    1.50
   5 -16   1   35.80    3.10
   5 -16   1   37.30    5.30
  -6  16  -1    6.60    2.90
  -6  16  -1    6.30    4.40
  -6  16  -1   -1.80    4.60
  -6  16  -1    0.70    3.00
  -6  16  -1   -1.00    1.70
  -6  16  -1   -0.70    2.90
  -6  16  -1   -3.00    1.50
  -6  16  -1   -1.70    1.80
   6 -16   1    0.20    2.30
   6 -16   1    2.20    3.80
  -7  16  -1   27.50    2.80
  -7  16  -1   26.90    5.90
  -7  16  -1   17.90    6.40
  -7  16  -1   33.40    4.00
  -7  16  -1   26.90    2.70
  -7  16  -1   22.00    5.70
  -7  16  -1   27.20    3.90
   7 -16   1   25.00    4.50
   7 -16   1   29.60    3.60
  -8  16  -1    3.00    2.30
  -8  16  -1    2.00    1.60
  -8  16  -1    3.10    1.50
  -8  16  -1   -3.00    3.40
  -8  16  -1   -1.60    2.60
   8 -16   1    0.40    2.80
   8 -16   1    3.80    2.60
  -9  16  -1    1.10    2.20
  -9  16  -1    0.90    2.80
   9 -16   1    0.80    3.20
 -10  16  -1   -4.10    3.00
 -10  16  -1    3.10    1.60
 -10  16  -1    1.10    3.00
 -10  16  -1    3.40    2.40
 -10  16  -1    1.50    1.50
 -10  16  -1    3.10    4.50
  10 -16   1    2.80    3.10
  10 -16   1    5.40    5.00
 -11  16  -1   11.80    2.80
 -11  16  -1    4.00    3.70
 -11  16  -1    6.10    1.60
 -11  16  -1    5.50    3.40
 -11  16  -1    3.40    4.50
 -11  16  -1    6.80    1.80
  11 -16   1    5.10    5.80
  11 -16   1    1.90    3.10
 -12  16  -1   23.70    5.00
 -14  16  -1    7.10    2.30
 -14  16  -1    1.40    1.70
 -14  16  -1    1.40    2.10
 -14  16  -1    1.00    1.50
 -14  16  -1    3.10    3.70
  14 -16   1    1.10    2.70
  14 -16   1   -1.70    3.60
  14  15  -1   -3.60    5.80
  14  15  -1   -2.40    2.50
  14  15  -1    6.80    6.70
  14  15  -1   -4.60    3.40
  14  15  -1   -0.90    2.90
  14  15  -1    1.70    4.50
 -14 -15   1    0.40    2.60
 -14 -15   1   -3.50    3.50
 -14 -15   1   -1.50    3.50
 -14 -15   1    4.50    3.50
 -14 -15   1    3.40    3.40
 -14 -15   1   -4.90    5.20
 -14 -15   1   -8.40    9.60
 -14 -15   1    2.40    2.50
 -14 -15   1   -1.30    4.80
  13  15  -1   13.10    3.50
  13  15  -1   15.00    3.60
  13  15  -1    6.40    2.20
  13  15  -1   15.30    4.20
  13  15  -1   11.20    5.60
 -13 -15   1   17.50    3.20
 -13 -15   1   21.50    8.60
 -13 -15   1   17.60    5.10
 -13 -15   1    9.70    3.30
 -13 -15   1   18.60    4.40
 -13 -15   1    9.60    3.80
 -13 -15   1    9.00    2.40
 -13 -15   1    9.80    3.60
  12  15  -1    0.50    3.40
  12  15  -1   -3.60    3.20
  12  15  -1    0.10    3.00
  12  15  -1    2.50    4.70
  12  15  -1   -2.50    1.70
  12  15  -1   -4.50    2.20
 -12 -15   1    2.60    2.70
 -12 -15   1    4.60    3.30
 -12 -15   1   -2.00    3.00
 -12 -15   1   -1.50    2.80
 -12 -15   1   -2.80    3.80
 -12 -15   1   -5.90    3.20
 -12 -15   1   -1.20    1.90
 -12 -15   1   -0.70    1.40
  11  15  -1   -3.60    5.10
  11  15  -1    8.80    5.20
  11  15  -1   11.00    4.00
  11  15  -1    6.20    1.90
  11  15  -1    5.20    2.70
  11  15  -1    7.70    3.10
 -11 -15   1    4.00    3.70
 -11 -15   1    8.50    3.50
 -11 -15   1   12.30    3.50
 -11 -15   1   16.70    5.90
 -11 -15   1    7.80    1.60
 -11 -15   1    2.90    3.00
 -11 -15   1    7.70    3.20
 -11 -15   1   15.40    3.90
  10  15  -1    3.40    5.00
  10  15  -1   -4.00    4.80
  10  15  -1    2.70    3.20
  10  15  -1    3.50    2.50
  10  15  -1    2.60    2.50
 -10 -15   1    2.40    2.90
 -10 -15   1   12.60    4.80
 -10 -15   1    4.90    3.70
 -10 -15   1    3.50    2.70
 -10 -15   1    4.60    2.50
 -10 -15   1    1.30    2.40
 -10 -15   1    1.10    3.00
   9  15  -1    4.10    3.40
   9  15  -1    2.50    2.70
   9  15  -1   -1.20    2.30
   9  15  -1    2.80    1.90
   9  15  -1   -3.40    5.10
   9  15  -1    2.20    1.20
   9  15  -1    3.60    4.10
  -9 -15   1    1.10    2.70
  -9 -15   1    2.70    3.50
  -9 -15   1    4.00    3.20
  -9 -15   1    2.00    2.60
  -9 -15   1    5.40    3.40
  -9 -15   1    1.70    2.20
  -9 -15   1    5.00    4.90
   8  15  -1   -0.70    2.50
   8  15  -1    2.80    3.20
   8  15  -1   -2.00    1.80
   8  15  -1   -1.00    5.60
   8  15  -1    3.70    3.00
  -8 -15   1    5.30    4.70
  -8 -15   1    3.50    3.90
  -8 -15   1    9.00    5.70
  -8 -15   1    3.60    3.20
  -8 -15   1    0.80    2.70
  -8 -15   1   -2.90    2.20
  -8 -15   1    0.50    2.70
   7  15  -1   -2.50    2.60
   7  15  -1    0.50    3.20
   7  15  -1    4.70    5.20
   7  15  -1    2.90    2.70
   7  15  -1    1.20    5.70
   7  15  -1    0.90    1.80
  -7 -15   1    4.10    2.40
  -7 -15   1    2.10    1.40
  -7 -15   1    7.60    5.00
  -7 -15   1    1.60    2.60
  -7 -15   1    0.90    2.60
  -7 -15   1   -0.30    5.30
  -7 -15   1   -3.10    4.00
  -7 -15   1   -0.30    2.60
   6  15  -1    5.80    2.10
   6  15  -1    3.40    2.60
   6  15  -1    3.00    3.50
   6  15  -1   13.10    6.40
   6  15  -1    2.40    5.70
   6  15  -1    9.40    2.40
  -6 -15   1    5.20    2.80
  -6 -15   1    5.50    2.70
  -6 -15   1    5.50    2.30
  -6 -15   1    4.90    5.10
  -6 -15   1    3.30    3.50
  -6 -15   1   11.10    4.30
   5  15  -1   22.40    4.30
   5  15  -1   16.90    5.60
   5  15  -1   16.40    3.20
   5  15  -1   20.10    2.70
   5  15  -1   12.60    6.30
   5  15  -1   15.40    3.10
  -5 -15   1   20.40    4.00
  -5 -15   1   18.20    2.90
  -5 -15   1   14.50    3.30
  -5 -15   1   15.40    5.70
  -5 -15   1   11.40    4.30
  -5 -15   1   12.00    2.90
   4  15  -1    4.80    2.40
   4  15  -1   -1.20    3.10
   4  15  -1   -2.60    5.30
   4  15  -1   -0.20    2.10
   4  15  -1    1.70    2.20
   4  15  -1   -1.70    4.50
  -4 -15   1    0.00    1.90
  -4 -15   1    0.80    2.20
  -4 -15   1    0.60    2.60
  -4 -15   1   -5.10    3.50
  -4 -15   1   -2.00    2.80
  -4 -15   1    0.10    5.10
   3  15  -1    2.90    5.00
   3  15  -1    5.10    3.60
   3  15  -1    1.90    4.60
   3  15  -1    6.20    2.40
   3  15  -1    5.90    2.60
   3  15  -1    6.30    2.40
  -3 -15   1    2.10    2.70
  -3 -15   1    6.60    2.20
  -3 -15   1    4.60    2.10
  -3 -15   1    3.80    2.10
  -3 -15   1    5.70    5.30
   2  15  -1    3.60    2.10
   2  15  -1    5.00    3.10
   2  15  -1    5.10    2.20
   2  15  -1    2.20    5.00
   2  15  -1    2.00    2.80
   2  15  -1    4.90    4.60
  -2 -15   1    7.00    2.60
  -2 -15   1    2.60    2.00
  -2 -15   1    3.90    2.40
  -2 -15   1    6.90    3.70
  -2 -15   1    6.00    4.60
  -2 -15   1    0.30    2.10
   1  15  -1    7.30    2.20
   1  15  -1    7.80    4.70
   1  15  -1    8.30    3.40
   1  15  -1    3.70    5.00
   1  15  -1    4.10    3.10
   1  15  -1    7.10    2.20
  -1 -15   1    8.30    2.80
  -1 -15   1    4.50    2.20
  -1 -15   1    8.10    4.50
  -1 -15   1   -4.70    3.40
  -1 -15   1    4.30    2.40
   0  15  -1   20.40    2.80
   0  15  -1   26.00    6.90
   0  15  -1   18.10    3.90
   0  15  -1   20.60    5.60
   0  15  -1   16.10    1.80
   0  15  -1   22.10    2.90
   0  15  -1   26.20    3.90
   0 -15   1   20.30    3.80
   0 -15   1   27.50    5.80
   0 -15   1   22.40    2.80
   0 -15   1   22.10    3.20
   0 -15   1   24.30    4.60
  -1  15  -1    2.60    2.30
  -1  15  -1   10.20    5.60
  -1  15  -1    1.10    1.80
  -1  15  -1    5.10    2.80
  -1  15  -1   -1.60    4.20
  -1  15  -1   -0.80    2.80
  -1  15  -1   -0.80    1.70
   1 -15   1    0.50    2.50
   1 -15   1    4.20    1.80
   1 -15   1    2.80    2.90
   1 -15   1    5.60    3.70
   1 -15   1    5.90    4.50
   1 -15   1    3.60    1.80
  -2  15  -1    1.70    1.90
  -2  15  -1    6.40    4.90
  -2  15  -1    5.80    2.90
  -2  15  -1    4.00    1.90
  -2  15  -1    0.70    4.30
  -2  15  -1    6.30    2.90
  -2  15  -1    3.50    1.90
   2 -15   1    3.00    1.60
   2 -15   1    1.10    2.60
   2 -15   1    1.80    2.60
   2 -15   1    3.70    1.60
  -3  15  -1    9.10    3.00
  -3  15  -1   10.20    3.10
  -3  15  -1    6.60    2.20
  -3  15  -1    1.40    4.50
  -3  15  -1    8.20    1.10
  -3  15  -1    6.20    4.80
   3 -15   1    7.30    1.50
   3 -15   1   10.90    3.10
   3 -15   1   10.30    1.60
   3 -15   1    7.20    5.60
   3 -15   1   12.90    2.70
  -4  15  -1   45.60    3.90
  -4  15  -1   39.40    6.20
  -4  15  -1   43.80    6.50
  -4  15  -1   40.80    6.20
  -4  15  -1   43.60    2.60
  -4  15  -1   45.00    4.10
  -4  15  -1   48.20    4.40
  -4  15  -1   44.20    5.40
   4 -15   1   43.10    4.00
   4 -15   1   46.20    5.00
   4 -15   1   46.10    2.80
   4 -15   1   41.70    2.90
   4 -15   1   45.90    2.30
   4 -15   1   43.10    4.30
  -5  15  -1    0.00    4.40
  -5  15  -1    0.60    1.40
  -5  15  -1    1.80    3.60
  -5  15  -1    7.70    4.10
  -5  15  -1    1.90    1.70
  -5  15  -1    0.10    4.20
  -5  15  -1    3.40    2.50
  -5  15  -1   -0.60    2.70
   5 -15   1    0.70    0.70
   5 -15   1   -3.70    2.90
   5 -15   1    4.20    1.80
  -6  15  -1   59.99    5.20
  -6  15  -1   64.19    8.50
  -6  15  -1   63.09    4.80
  -6  15  -1   50.09    8.10
  -6  15  -1   60.79    5.40
  -6  15  -1   55.99    3.40
  -6  15  -1   62.19    3.70
  -6  15  -1   77.19    7.90
   6 -15   1   70.39    4.50
   6 -15   1   71.29    5.70
  -7  15  -1    3.60    4.60
  -7  15  -1   12.60    4.60
  -7  15  -1    8.40    2.80
  -7  15  -1    4.80    3.20
  -7  15  -1    5.90    1.70
  -7  15  -1    8.70    1.80
  -7  15  -1    8.40    2.90
   7 -15   1    6.90    2.60
   7 -15   1    6.60    3.20
  -8  15  -1   13.70    2.10
  -8  15  -1   16.80    3.00
  -8  15  -1   13.90    2.00
  -8  15  -1    7.30    5.20
  -8  15  -1    9.30    5.00
  -8  15  -1   25.20    5.20
  -8  15  -1   17.70    3.50
   8 -15   1   13.50    3.40
   8 -15   1   14.10    3.10
  -9  15  -1   -0.50    1.30
  -9  15  -1   -2.30    4.20
  -9  15  -1   -1.10    3.00
  -9  15  -1   -2.40    3.30
  -9  15  -1   -0.80    1.20
  -9  15  -1    1.10    2.00
   9 -15   1   -0.80    2.70
   9 -15   1    4.60    2.80
 -10  15  -1    7.90    3.70
 -10  15  -1    9.40    3.50
 -10  15  -1   21.30    5.00
 -10  15  -1    5.20    1.60
 -10  15  -1   15.40    5.10
 -10  15  -1    8.10    1.60
 -10  15  -1   11.00    2.60
  10 -15   1   10.20    3.30
  10 -15   1    9.60    3.10
 -11  15  -1    8.20    3.90
  11 -15   1    8.60    3.90
 -12  15  -1   23.30    2.40
 -12  15  -1   27.60    3.30
 -12  15  -1   22.10    2.50
 -12  15  -1   26.00    4.50
 -12  15  -1   20.70    2.90
 -12  15  -1   24.30    4.60
 -12  15  -1   34.20    6.00
  12 -15   1   23.30    4.20
  12 -15   1   15.20    4.20
 -13  15  -1   21.60    4.80
  14  14  -1   20.90    4.30
  14  14  -1   12.80    4.20
  14  14  -1    9.50    3.00
  14  14  -1   10.30    5.20
  14  14  -1   11.80    4.20
 -14 -14   1   13.60    2.90
 -14 -14   1   16.00    9.10
 -14 -14   1   12.70    3.10
 -14 -14   1   15.50    4.10
 -14 -14   1   17.70    4.20
 -14 -14   1   27.60    6.90
 -14 -14   1    7.30    4.90
 -14 -14   1    8.60    4.10
  13  14  -1    2.50    3.10
  13  14  -1   -0.90    4.60
  13  14  -1    3.70    3.40
  13  14  -1    0.90    2.50
  13  14  -1   -2.80    4.30
  13  14  -1   -0.20    2.20
 -13 -14   1    4.00    5.60
 -13 -14   1   -1.90    2.10
 -13 -14   1    2.90    2.50
 -13 -14   1   -0.10    3.60
 -13 -14   1    3.20    3.10
 -13 -14   1    2.80    3.50
 -13 -14   1   -8.80    7.00
 -13 -14   1    0.80    3.40
 -13 -14   1    4.70    3.40
 -13 -14   1    1.80    4.80
  12  14  -1    4.80    2.20
  12  14  -1    4.50    3.00
  12  14  -1    3.10    2.60
  12  14  -1    4.30    3.30
  12  14  -1    2.00    5.70
  12  14  -1   -2.20    4.60
 -12 -14   1    1.90    3.10
 -12 -14   1    4.10    2.30
 -12 -14   1    1.30    3.60
 -12 -14   1    5.80    3.00
 -12 -14   1    5.20    3.20
 -12 -14   1    3.40    2.30
 -12 -14   1   13.50    6.50
 -12 -14   1    1.60    5.10
 -12 -14   1    7.60    3.50
  11  14  -1    0.00    2.50
  11  14  -1   -1.00    5.50
  11  14  -1   -2.40    4.80
  11  14  -1    0.20    3.00
  11  14  -1    3.50    2.70
  11  14  -1    1.70    1.80
 -11 -14   1   -1.50    2.80
 -11 -14   1    2.60    1.70
 -11 -14   1    5.00    3.40
 -11 -14   1    2.80    3.60
 -11 -14   1    1.60    5.80
 -11 -14   1    0.80    1.80
 -11 -14   1   -0.20    3.00
 -11 -14   1    0.00    2.90
 -11 -14   1    2.70    2.80
  10  14  -1   -5.40    4.30
  10  14  -1   -0.30    1.40
  10  14  -1    1.90    2.30
  10  14  -1   -4.70    2.90
  10  14  -1   -2.60    2.40
 -10 -14   1    3.40    2.90
 -10 -14   1    2.00    2.60
 -10 -14   1    3.30    3.10
 -10 -14   1    0.70    3.70
 -10 -14   1    0.10    2.60
 -10 -14   1    0.80    1.40
 -10 -14   1   -2.70    4.60
 -10 -14   1   -0.30    2.90
   9  14  -1   13.30    3.30
   9  14  -1   15.60    2.70
   9  14  -1   13.70    6.00
   9  14  -1   19.70    5.70
   9  14  -1   17.80    4.00
   9  14  -1   23.90    3.80
  -9 -14   1    8.40    3.00
  -9 -14   1   15.20    5.50
  -9 -14   1   14.90    3.80
  -9 -14   1   17.40    4.50
  -9 -14   1   14.50    4.40
  -9 -14   1   13.30    3.50
  -9 -14   1   14.80    3.10
  -9 -14   1   14.40    1.60
   8  14  -1    3.30    2.80
   8  14  -1   -1.00    1.90
   8  14  -1   -4.60    4.70
   8  14  -1   -2.10    1.00
   8  14  -1    1.00    5.50
   8  14  -1   -1.80    2.90
   8  14  -1   -2.40    2.30
  -8 -14   1   -0.30    4.80
  -8 -14   1    0.60    2.10
  -8 -14   1    7.40    5.30
  -8 -14   1   -0.20    2.60
  -8 -14   1    8.40    4.10
  -8 -14   1    0.80    2.00
  -8 -14   1   -1.70    2.10
   7  14  -1    8.20    2.90
   7  14  -1   10.30    3.00
   7  14  -1    7.80    2.20
   7  14  -1    8.00    5.30
   7  14  -1   10.60    3.70
   7  14  -1   17.90    6.20
  -7 -14   1    6.40    3.40
  -7 -14   1    6.00    5.10
  -7 -14   1    6.80    3.10
  -7 -14   1    5.10    4.10
  -7 -14   1   11.20    2.70
  -7 -14   1   10.90    5.60
  -7 -14   1    9.80    3.70
   6  14  -1    6.40    4.10
   6  14  -1    8.60    2.70
   6  14  -1    6.00    5.20
   6  14  -1    6.50    2.30
   6  14  -1    5.70    2.60
   6  14  -1   -1.00    5.60
  -6 -14   1    7.00    2.30
  -6 -14   1    2.70    3.20
  -6 -14   1    6.80    1.50
  -6 -14   1    2.80    2.50
  -6 -14   1    5.90    4.60
  -6 -14   1    5.70    2.60
   5  14  -1    7.00    2.60
   5  14  -1    4.50    4.70
   5  14  -1    6.00    2.60
   5  14  -1    4.20    2.40
   5  14  -1    6.40    2.10
   5  14  -1   -1.30    5.40
  -5 -14   1    2.90    4.40
  -5 -14   1    4.00    2.20
  -5 -14   1    2.40    2.40
  -5 -14   1    7.40    2.20
  -5 -14   1    0.20    3.10
  -5 -14   1    4.30    3.60
   4  14  -1    2.70    2.20
   4  14  -1    0.50    2.10
   4  14  -1    4.10    4.60
   4  14  -1    2.40    2.20
   4  14  -1    2.30    2.10
  -4 -14   1    0.70    4.20
  -4 -14   1    5.50    4.80
  -4 -14   1   -4.40    3.00
  -4 -14   1    0.50    2.00
  -4 -14   1   -0.40    1.90
   3  14  -1    1.50    2.00
   3  14  -1    3.90    5.20
   3  14  -1    2.20    2.10
   3  14  -1    3.50    2.10
   3  14  -1   -3.80    4.30
   3  14  -1    2.40    2.50
  -3 -14   1   -0.20    2.60
  -3 -14   1    2.50    1.90
  -3 -14   1    6.20    4.20
  -3 -14   1    3.30    2.00
  -3 -14   1    1.80    1.90
  -3 -14   1   -1.50    4.30
   2  14  -1   33.50    3.50
   2  14  -1   35.20    6.20
   2  14  -1   38.30    4.50
   2  14  -1   33.40    5.80
   2  14  -1   34.20    4.00
   2  14  -1   34.10    3.50
  -2 -14   1   35.10    3.20
  -2 -14   1   40.70    6.00
  -2 -14   1   33.70    3.10
  -2 -14   1   31.30    4.10
  -2 -14   1   30.70    3.10
  -2 -14   1   26.80    7.30
   1  14  -1    1.60    4.30
   1  14  -1    1.40    1.80
   1  14  -1    6.20    4.90
   1  14  -1    0.90    2.80
   1  14  -1    2.70    1.90
   1  14  -1    8.40    3.10
  -1 -14   1    0.80    2.00
  -1 -14   1   -1.00    3.90
  -1 -14   1    2.90    2.10
  -1 -14   1    1.20    2.00
  -1 -14   1    1.30    2.60
  -1 -14   1   -1.00    3.10
   0  14  -1   12.40    2.30
   0  14  -1   13.80    4.80
   0  14  -1   13.80    3.30
   0  14  -1   12.70    3.40
   0  14  -1   11.40    1.60
   0  14  -1   11.70    4.90
   0  14  -1   14.10    2.30
   0 -14   1    8.30    3.40
   0 -14   1   12.00    3.70
   0 -14   1   11.70    2.20
   0 -14   1   13.50    2.20
   0 -14   1   12.90    2.50
   0 -14   1   10.10    3.00
  -1  14  -1   -2.70    2.30
  -1  14  -1   -0.80    1.60
  -1  14  -1    2.80    4.00
  -1  14  -1   -1.10    1.40
  -1  14  -1    2.70    1.80
  -1  14  -1    0.80    3.00
  -1  14  -1    0.30    4.20
   1 -14   1   -1.60    1.50
   1 -14   1    0.50    1.30
   1 -14   1   -0.20    1.70
   1 -14   1   -4.80    3.60
   1 -14   1   -4.20    2.10
  -2  14  -1    9.80    4.50
  -2  14  -1   10.10    3.40
  -2  14  -1   13.20    3.00
  -2  14  -1   11.70    4.60
  -2  14  -1   14.00    2.50
  -2  14  -1   10.10    2.10
  -2  14  -1    6.30    2.10
   2 -14   1    9.30    1.70
   2 -14   1    9.40    2.20
   2 -14   1   12.10    3.00
   2 -14   1   10.70    3.60
   2 -14   1   11.40    1.80
  -3  14  -1    2.90    1.50
  -3  14  -1    6.90    1.30
  -3  14  -1   10.90    3.40
  -3  14  -1    9.00    2.80
  -3  14  -1    6.30    3.40
  -3  14  -1    2.80    4.00
  -3  14  -1    8.40    4.20
   3 -14   1   10.40    3.40
   3 -14   1    7.00    1.40
   3 -14   1    7.00    1.60
   3 -14   1    7.20    1.50
   3 -14   1    3.30    2.60
   3 -14   1    5.10    2.40
  -4  14  -1    7.00    3.00
  -4  14  -1   12.80    4.40
  -4  14  -1   15.50    3.00
  -4  14  -1   14.50    4.80
  -4  14  -1   12.90    2.80
  -4  14  -1   16.20    3.90
  -4  14  -1   11.90    2.00
  -4  14  -1    8.00    4.60
   4 -14   1    7.00    2.70
   4 -14   1   17.90    3.60
   4 -14   1   12.00    2.70
   4 -14   1    9.20    1.30
   4 -14   1   11.20    1.40
  -5  14  -1   22.80    2.60
  -5  14  -1   23.80    3.40
  -5  14  -1   25.80    9.00
  -5  14  -1   12.30    4.80
  -5  14  -1   21.60    5.20
  -5  14  -1   17.60    3.50
  -5  14  -1   18.80    2.10
  -5  14  -1   26.10    3.70
   5 -14   1   22.90    4.00
   5 -14   1   18.60    1.20
   5 -14   1   15.00    1.20
  -6  14  -1   28.10    4.00
  -6  14  -1   22.80    2.80
  -6  14  -1   26.70    2.60
  -6  14  -1   27.30    3.50
  -6  14  -1   26.20    3.40
  -6  14  -1   23.10    5.30
  -6  14  -1   27.50    5.40
   6 -14   1   27.90    3.30
   6 -14   1   21.20    3.90
  -7  14  -1   18.50    4.90
  -7  14  -1   17.60    3.70
  -7  14  -1   14.80    2.00
  -7  14  -1   13.90    4.90
  -7  14  -1   13.20    3.50
  -7  14  -1   15.10    2.40
  -7  14  -1   20.30    3.10
   7 -14   1   18.90    3.00
   7 -14   1   10.30    3.20
  -8  14  -1   -5.20    3.20
  -8  14  -1    1.20    1.30
  -8  14  -1   -1.90    2.20
  -8  14  -1    1.60    1.40
  -8  14  -1   -3.90    3.00
  -8  14  -1   -1.00    3.90
   8 -14   1    0.60    2.50
   8 -14   1   -4.40    2.40
  -9  14  -1   12.20    3.50
  -9  14  -1   15.20    1.90
  -9  14  -1    9.80    3.40
  -9  14  -1   13.20    1.90
  -9  14  -1   18.20    3.00
  -9  14  -1   19.80    6.00
   9 -14   1    9.90    3.40
   9 -14   1   10.30    2.90
 -10  14  -1   -2.20    3.80
 -10  14  -1   -3.50    3.00
 -10  14  -1    3.50    2.40
 -10  14  -1    1.40    1.40
 -10  14  -1   -0.80    1.20
 -10  14  -1   -0.40    3.70
  10 -14   1    0.00    3.20
  10 -14   1   -3.90    2.10
 -11  14  -1   17.50    2.00
 -11  14  -1   13.20    4.10
 -11  14  -1   32.60    5.80
 -11  14  -1   24.10    4.50
 -11  14  -1   20.10    3.10
 -11  14  -1   23.80    3.30
  11 -14   1   16.40    3.70
  11 -14   1   19.00    3.70
 -12  14  -1    0.30    1.30
 -12  14  -1    2.20    3.30
 -12  14  -1    1.60    1.70
 -12  14  -1   -3.00    3.20
 -12  14  -1   -0.40    1.60
 -12  14  -1    8.70    4.50
  12 -14   1   -0.70    2.60
  12 -14   1    0.70    4.10
 -13  14  -1   19.00    4.20
 -13  14  -1   17.10    4.40
 -13  14  -1   14.70    2.50
 -13  14  -1   16.30    2.70
 -13  14  -1   15.40    1.90
 -13  14  -1   14.40    1.90
  13 -14   1   14.60    4.20
  13 -14   1   17.70    3.40
 -14  14  -1    1.40    3.70
 -14  14  -1    2.40    1.90
 -14  14  -1    5.30    1.60
 -14  14  -1    2.50    1.50
 -14  14  -1    3.00    1.90
 -14  14  -1    1.20    3.80
  14 -14   1    1.70    3.80
  14 -14   1    3.10    2.50
 -15  14  -1    7.80    6.80
  14  13  -1   -2.40    3.30
  14  13  -1   -6.70    3.90
  14  13  -1    3.60    2.80
  14  13  -1   -2.90    4.30
  14  13  -1    0.10    3.10
 -14 -13   1    1.40    3.60
 -14 -13   1    8.80    3.40
 -14 -13   1    1.80    3.50
 -14 -13   1    3.00    2.30
 -14 -13   1    3.30    3.90
 -14 -13   1    1.40    3.30
 -14 -13   1    4.40    5.50
 -14 -13   1    4.90    2.60
 -14 -13   1   -8.60    7.40
  13  13  -1    7.70    2.40
  13  13  -1   10.80    5.20
  13  13  -1    5.90    4.70
  13  13  -1    8.10    3.50
  13  13  -1   12.10    3.50
  13  13  -1    8.00    2.60
 -13 -13   1   10.50    4.00
 -13 -13   1   19.60    7.80
 -13 -13   1    6.30    4.00
 -13 -13   1   16.80    6.00
 -13 -13   1   11.00    3.70
 -13 -13   1    5.80    4.00
 -13 -13   1    8.80    3.50
 -13 -13   1   13.50    2.90
 -13 -13   1   10.50    2.70
 -13 -13   1    9.40    4.10
  12  13  -1    0.50    4.40
  12  13  -1   -0.70    4.20
  12  13  -1    3.40    2.60
  12  13  -1    3.50    2.30
  12  13  -1    1.40    3.10
  12  13  -1    2.60    2.70
 -12 -13   1    5.00    3.70
 -12 -13   1    2.10    3.50
 -12 -13   1    1.20    1.90
 -12 -13   1    6.60    3.40
 -12 -13   1    6.20    5.10
 -12 -13   1    1.00    3.40
 -12 -13   1   -2.00    3.30
 -12 -13   1    6.50    3.40
 -12 -13   1   -1.80    6.40
 -12 -13   1    1.80    2.10
  11  13  -1    8.40    5.00
  11  13  -1    6.80    2.80
  11  13  -1    9.50    3.60
  11  13  -1    8.20    3.20
  11  13  -1   10.20    2.40
  11  13  -1    8.30    5.80
 -11 -13   1    9.60    3.30
 -11 -13   1    5.80    3.30
 -11 -13   1    7.80    3.40
 -11 -13   1    7.20    4.00
 -11 -13   1   17.00    5.60
 -11 -13   1   10.00    3.30
 -11 -13   1   15.10    3.60
 -11 -13   1    9.00    2.40
  10  13  -1    1.90    2.60
  10  13  -1    0.60    3.20
  10  13  -1   -0.20    1.40
  10  13  -1   -0.40    2.50
  10  13  -1   -1.50    4.70
  10  13  -1    1.60    4.60
 -10 -13   1    1.30    2.90
 -10 -13   1   -2.20    2.00
 -10 -13   1   -1.70    2.70
 -10 -13   1   -3.60    2.70
 -10 -13   1   -1.50    1.50
 -10 -13   1    0.00    3.50
 -10 -13   1    0.30    2.90
 -10 -13   1   -0.90    2.90
 -10 -13   1   -6.50    4.40
   9  13  -1   -1.60    2.40
   9  13  -1    0.40    2.60
   9  13  -1    9.20    5.00
   9  13  -1    3.80    1.60
   9  13  -1    1.20    5.30
   9  13  -1   -0.90    3.00
   9  13  -1    1.90    2.10
  -9 -13   1    3.50    2.50
  -9 -13   1    2.80    1.50
  -9 -13   1   -0.80    5.90
  -9 -13   1   -2.20    5.20
  -9 -13   1   -3.40    2.10
  -9 -13   1    3.70    2.90
  -9 -13   1    3.70    2.50
  -9 -13   1    2.50    3.00
   8  13  -1    8.50    2.30
   8  13  -1    5.90    2.80
   8  13  -1    5.20    5.50
   8  13  -1    1.00    2.60
   8  13  -1    5.10    1.60
   8  13  -1    9.80    4.20
   8  13  -1    4.20    5.00
  -8 -13   1    5.30    4.80
  -8 -13   1    2.10    6.10
  -8 -13   1    4.60    2.20
  -8 -13   1    6.70    3.70
  -8 -13   1    5.30    1.20
  -8 -13   1    2.50    2.60
  -8 -13   1    6.50    2.90
  -8 -13   1    6.10    3.60
  -8 -13   1    6.70    3.30
   7  13  -1   17.20    3.20
   7  13  -1   27.10    4.30
   7  13  -1   21.10    2.70
   7  13  -1   11.20    5.80
   7  13  -1   16.20    5.70
   7  13  -1   21.10    3.50
   7  13  -1   16.80    1.70
  -7 -13   1   23.30    3.70
  -7 -13   1   30.60    6.30
  -7 -13   1   23.10    3.40
  -7 -13   1   16.70    6.20
  -7 -13   1   19.60    3.50
  -7 -13   1   19.70    3.10
  -7 -13   1   22.20    4.50
  -7 -13   1   17.00    3.80
   6  13  -1    2.20    1.80
   6  13  -1   -3.40    2.70
   6  13  -1   -1.90    4.60
   6  13  -1    0.40    2.30
   6  13  -1    1.40    2.40
  -6 -13   1    6.60    4.60
  -6 -13   1    1.40    2.30
  -6 -13   1    0.20    4.90
  -6 -13   1    0.90    1.60
  -6 -13   1   -2.70    2.10
  -6 -13   1    1.00    2.20
  -6 -13   1   -1.60    3.20
   5  13  -1    1.00    1.80
   5  13  -1   -1.70    1.90
   5  13  -1   -0.90    1.90
   5  13  -1   -1.90    2.60
   5  13  -1   -0.40    5.20
   5  13  -1    2.30    4.60
  -5 -13   1   -0.10    2.00
  -5 -13   1   -2.10    2.60
  -5 -13   1   -0.60    0.90
  -5 -13   1    1.90    4.30
  -5 -13   1   -2.00    2.00
  -5 -13   1    2.20    2.00
  -5 -13   1    3.40    4.70
  -5 -13   1    3.60    3.40
   4  13  -1    0.70    2.60
   4  13  -1    3.90    5.20
   4  13  -1    2.10    2.00
   4  13  -1    2.00    1.90
   4  13  -1    6.10    4.60
   4  13  -1    2.70    2.00
  -4 -13   1    3.60    1.90
  -4 -13   1    4.40    2.10
  -4 -13   1   -2.90    3.90
  -4 -13   1    4.50    2.20
  -4 -13   1   -2.70    2.70
   3  13  -1   30.20    3.40
   3  13  -1   26.10    5.40
   3  13  -1   28.70    3.20
   3  13  -1   27.40    4.00
   3  13  -1   26.30    3.40
   3  13  -1   27.60    6.00
  -3 -13   1   26.50    3.00
  -3 -13   1   25.90    2.90
  -3 -13   1   29.50    3.90
  -3 -13   1   33.50    5.30
  -3 -13   1   23.50    2.80
  -3 -13   1   24.70    4.30
   2  13  -1   -0.10    2.50
   2  13  -1    2.20    2.60
   2  13  -1   -4.70    3.80
   2  13  -1    3.20    1.90
   2  13  -1   -0.60    4.60
   2  13  -1    4.10    1.90
  -2 -13   1    0.80    1.70
  -2 -13   1   -1.40    1.60
  -2 -13   1    1.00    2.40
  -2 -13   1    4.70    3.80
  -2 -13   1   -2.70    2.80
  -2 -13   1    2.10    1.50
   1  13  -1   66.29    8.20
   1  13  -1   60.69    4.20
   1  13  -1   63.59    4.00
   1  13  -1   64.99    7.30
   1  13  -1   72.79    5.10
   1  13  -1   70.19    4.00
  -1 -13   1   64.79    3.60
  -1 -13   1   69.49    3.80
  -1 -13   1   68.29    4.90
  -1 -13   1   64.39    5.60
  -1 -13   1   66.79    7.00
  -1 -13   1   63.99    3.70
   0  13  -1    0.40    1.40
   0  13  -1    5.10    2.50
   0  13  -1    0.50    2.70
   0  13  -1    3.70    4.40
   0  13  -1    3.40    1.70
   0  13  -1    1.50    1.60
   0  13  -1    1.30    4.00
   0 -13   1    6.30    2.00
   0 -13   1    5.90    2.10
   0 -13   1    1.60    2.80
   0 -13   1    0.50    3.60
   0 -13   1    2.00    1.40
  -1  13  -1   23.30    3.50
  -1  13  -1   21.90    2.40
  -1  13  -1   22.70    3.50
  -1  13  -1   23.60    2.60
  -1  13  -1   21.60    2.50
  -1  13  -1   19.60    4.80
  -1  13  -1   14.80    4.80
   1 -13   1   19.00    3.10
   1 -13   1   19.90    2.00
   1 -13   1   20.20    3.90
   1 -13   1   19.40    4.60
   1 -13   1   22.20    2.60
  -2  13  -1   -0.80    2.10
  -2  13  -1    0.50    2.70
  -2  13  -1   -0.50    1.60
  -2  13  -1    7.00    2.50
  -2  13  -1    1.10    0.90
  -2  13  -1   -3.00    3.70
  -2  13  -1   -2.10    1.30
  -2  13  -1    3.00    1.90
  -2  13  -1    2.40    0.80
   2 -13   1    4.00    2.30
   2 -13   1   -0.50    2.30
   2 -13   1    1.50    1.30
   2 -13   1   -0.30    2.50
   2 -13   1    1.00    1.30
  -3  13  -1   35.10    3.10
  -3  13  -1   37.00    3.90
  -3  13  -1   29.00    2.70
  -3  13  -1   31.00    3.70
  -3  13  -1   33.50    3.40
  -3  13  -1   32.20    5.10
  -3  13  -1   26.80    5.20
   3 -13   1   25.80    3.30
   3 -13   1   26.50    3.20
   3 -13   1   32.70    2.20
   3 -13   1   32.10    4.10
   3 -13   1   32.20    2.10
   3 -13   1   35.90    2.40
  -4  13  -1    6.20    4.10
  -4  13  -1   11.40    3.40
  -4  13  -1    6.20    2.40
  -4  13  -1    3.60    2.30
  -4  13  -1    5.70    1.50
  -4  13  -1    6.60    1.50
  -4  13  -1    5.90    3.90
   4 -13   1    6.50    2.30
   4 -13   1    7.60    2.50
   4 -13   1    6.00    1.10
   4 -13   1   10.90    2.90
   4 -13   1    6.00    1.10
  -5  13  -1   18.10    3.20
  -5  13  -1   20.20    3.10
  -5  13  -1   25.40    4.90
  -5  13  -1   19.00    5.10
  -5  13  -1   17.50    3.10
  -5  13  -1   22.30    2.30
  -5  13  -1   21.40    2.30
   5 -13   1   21.20    1.20
   5 -13   1   21.70    3.80
   5 -13   1   19.70    2.60
   5 -13   1   17.90    1.20
  -6  13  -1    2.00    2.00
  -6  13  -1    1.80    2.60
  -6  13  -1   -3.40    3.40
  -6  13  -1    0.90    1.30
  -6  13  -1   -0.50    1.20
  -6  13  -1   -1.10    2.10
  -6  13  -1   -2.90    3.80
   6 -13   1   -0.60    1.80
   6 -13   1    2.70    2.40
  -7  13  -1    2.90    1.30
  -7  13  -1    2.00    1.30
  -7  13  -1   -2.10    6.70
  -7  13  -1   -0.80    2.50
  -7  13  -1    3.10    3.00
  -7  13  -1    1.80    2.60
   7 -13   1    0.80    1.90
   7 -13   1    2.10    2.50
  -8  13  -1   44.70    6.90
  -8  13  -1   23.90    3.10
  -8  13  -1   29.10    4.10
  -8  13  -1   23.60    4.00
  -8  13  -1   23.90    2.30
  -8  13  -1   25.90    2.30
  -8  13  -1   24.60    5.40
   8 -13   1   31.10    3.70
   8 -13   1   24.80    3.90
  -9  13  -1   -1.30    3.90
  -9  13  -1   -3.20    3.80
  -9  13  -1   -1.90    4.10
  -9  13  -1   -5.10    3.10
  -9  13  -1   -1.00    1.90
  -9  13  -1   -2.20    3.00
  -9  13  -1   -0.20    1.40
  -9  13  -1   -1.00    1.20
   9 -13   1   -0.30    2.30
   9 -13   1   -2.50    2.90
 -10  13  -1   26.60    4.70
 -10  13  -1   30.80    2.50
 -10  13  -1   42.40    6.50
 -10  13  -1   29.80    3.20
 -10  13  -1   27.60    4.40
 -10  13  -1   41.60    6.60
  10 -13   1   39.50    5.20
  10 -13   1   26.20    3.90
 -11  13  -1    2.20    4.70
 -11  13  -1    2.00    2.30
 -11  13  -1    7.50    4.40
 -11  13  -1    0.70    3.40
 -11  13  -1    0.50    1.40
 -11  13  -1   12.20    4.40
 -11  13  -1   -0.70    1.40
 -11  13  -1   -1.00    1.80
 -11  13  -1   -1.80    3.20
  11 -13   1    5.60    3.20
  11 -13   1   -0.80    2.60
 -12  13  -1   28.20    8.30
 -12  13  -1   19.20    5.10
 -12  13  -1   19.50    2.20
 -12  13  -1   22.00    3.00
 -12  13  -1   13.80    4.00
 -12  13  -1   22.40    2.20
 -12  13  -1   21.60    2.90
  12 -13   1   22.70    3.50
 -13  13  -1    3.00    4.00
 -13  13  -1    0.70    2.10
 -13  13  -1    2.40    3.10
  13 -13   1    0.80    3.40
  13 -13   1    2.20    2.30
 -14  13  -1    5.40    2.00
 -14  13  -1    0.10    3.70
 -14  13  -1    7.90    3.70
 -14  13  -1    3.10    1.60
 -14  13  -1    4.90    1.40
 -14  13  -1    4.50    2.20
  14 -13   1   -1.60    3.60
  14 -13   1    4.80    2.60
  14  12  -1   11.80    4.70
  14  12  -1   15.70    3.80
  14  12  -1   11.70    3.60
  14  12  -1   10.50    2.80
  14  12  -1    6.80    4.70
 -14 -12   1   10.20    3.40
 -14 -12   1    8.30    3.00
 -14 -12   1    6.00    3.80
 -14 -12   1    7.60    5.70
 -14 -12   1    7.90    4.20
 -14 -12   1    5.90    3.50
 -14 -12   1    2.80    3.30
 -14 -12   1   10.90    7.70
 -14 -12   1    6.60    3.30
 -14 -12   1    7.00    2.80
  13  12  -1    3.00    3.10
  13  12  -1    2.90    2.60
  13  12  -1    4.80    4.70
  13  12  -1    6.70    3.00
  13  12  -1    3.40    4.40
  13  12  -1    3.20    2.70
 -13 -12   1   10.30    5.60
 -13 -12   1    3.60    3.50
 -13 -12   1    2.70    3.10
 -13 -12   1    4.60    7.30
 -13 -12   1    5.10    4.00
 -13 -12   1    2.70    2.70
 -13 -12   1    1.90    3.10
 -13 -12   1    6.30    2.50
 -13 -12   1    5.70    2.60
 -13 -12   1    4.40    3.00
  12  12  -1    2.80    4.50
  12  12  -1    5.40    2.60
  12  12  -1    4.50    2.90
  12  12  -1    5.80    3.30
  12  12  -1   -0.20    4.20
  12  12  -1    3.40    2.60
 -12 -12   1    4.20    3.10
 -12 -12   1    1.00    2.80
 -12 -12   1    5.40    2.40
 -12 -12   1    2.10    3.40
 -12 -12   1    5.70    2.70
 -12 -12   1    3.20    3.00
 -12 -12   1    3.20    3.60
 -12 -12   1    1.20    6.40
 -12 -12   1    7.60    3.40
 -12 -12   1    7.20    5.30
  11  12  -1    1.70    4.70
  11  12  -1    6.80    2.30
  11  12  -1    3.30    3.20
  11  12  -1    5.20    2.10
  11  12  -1    4.70    4.70
  11  12  -1    6.30    2.80
 -11 -12   1    4.40    3.40
 -11 -12   1    1.30    2.20
 -11 -12   1    0.40    5.90
 -11 -12   1    5.50    5.50
 -11 -12   1    4.80    2.20
 -11 -12   1    3.90    3.40
 -11 -12   1    4.80    2.10
 -11 -12   1    8.10    3.60
 -11 -12   1    7.90    3.20
  10  12  -1   18.50    5.50
  10  12  -1   24.90    5.90
  10  12  -1   27.10    3.70
  10  12  -1   22.60    3.70
  10  12  -1   24.10    5.00
  10  12  -1   23.90    3.00
 -10 -12   1   17.10    5.10
 -10 -12   1   24.50    3.50
 -10 -12   1   17.60    2.90
 -10 -12   1   22.10    2.70
 -10 -12   1   18.60    6.70
 -10 -12   1   22.20    3.80
 -10 -12   1   19.40    5.90
 -10 -12   1   17.80    3.70
 -10 -12   1   27.20    4.20
 -10 -12   1   23.30    4.20
   9  12  -1    2.50    4.90
   9  12  -1    3.10    2.80
   9  12  -1    5.60    2.20
   9  12  -1    1.20    4.90
   9  12  -1   -1.10    2.40
   9  12  -1    4.60    3.10
   9  12  -1   -0.70    1.50
  -9 -12   1    2.10    3.20
  -9 -12   1    3.20    1.90
  -9 -12   1   -4.70    3.20
  -9 -12   1   -5.70    2.50
  -9 -12   1   -0.20    4.60
  -9 -12   1    1.30    2.70
  -9 -12   1    3.70    3.70
  -9 -12   1    3.20    2.50
  -9 -12   1    1.60    1.70
   8  12  -1   11.60    2.40
   8  12  -1    5.50    2.80
   8  12  -1    4.40    2.40
   8  12  -1    7.00    5.00
   8  12  -1    1.80    5.90
   8  12  -1   13.20    3.00
  -8 -12   1    8.60    4.20
  -8 -12   1    2.10    8.00
  -8 -12   1    9.70    5.30
  -8 -12   1    4.80    2.80
  -8 -12   1    4.80    1.50
  -8 -12   1    5.80    3.50
  -8 -12   1    9.50    3.00
  -8 -12   1    7.10    2.00
  -8 -12   1    4.10    2.50
  -8 -12   1   12.60    5.20
   7  12  -1   -2.90    4.90
   7  12  -1    2.20    2.80
   7  12  -1   -0.20    2.00
   7  12  -1    0.30    1.60
   7  12  -1    0.60    4.40
   7  12  -1   -2.20    2.10
   7  12  -1    1.00    1.20
  -7 -12   1    0.70    1.00
  -7 -12   1    0.40    1.30
  -7 -12   1   -1.70    2.20
  -7 -12   1   -6.30    4.50
  -7 -12   1   -2.50    3.90
  -7 -12   1    1.90    2.30
  -7 -12   1    2.00    2.50
  -7 -12   1    2.20    2.30
  -7 -12   1    1.20    3.10
  -7 -12   1    0.50    2.60
   6  12  -1    8.50    5.60
   6  12  -1    6.90    2.90
   6  12  -1    9.90    2.50
   6  12  -1   11.70    2.20
   6  12  -1   10.90    1.30
   6  12  -1   12.70    4.80
   6  12  -1   13.30    2.10
  -6 -12   1    8.80    2.50
  -6 -12   1    7.90    2.60
  -6 -12   1   10.70    2.50
  -6 -12   1   11.90    4.50
  -6 -12   1    9.40    4.60
  -6 -12   1   10.30    2.40
  -6 -12   1   -0.10    3.10
  -6 -12   1   10.40    2.20
   5  12  -1    5.20    2.80
   5  12  -1    6.40    2.20
   5  12  -1    8.70    2.30
   5  12  -1   -0.80    5.00
   5  12  -1    5.80    1.90
   5  12  -1    6.80    4.60
  -5 -12   1    3.40    2.90
  -5 -12   1   10.60    4.40
  -5 -12   1    1.60    3.80
  -5 -12   1    5.30    2.10
  -5 -12   1    8.40    2.90
  -5 -12   1    6.10    1.50
  -5 -12   1   11.80    2.40
   4  12  -1   -1.00    1.20
   4  12  -1    0.90    1.90
   4  12  -1   -1.70    4.00
   4  12  -1   -2.10    4.60
   4  12  -1   -0.70    1.70
   4  12  -1    0.40    2.40
  -4 -12   1    0.60    0.80
  -4 -12   1   -0.30    3.30
  -4 -12   1    4.20    2.50
  -4 -12   1   -0.10    1.80
  -4 -12   1    3.30    1.80
  -4 -12   1    1.90    0.60
  -4 -12   1   -0.40    2.30
  -4 -12   1    1.10    3.50
  -4 -12   1   -0.60    2.50
   3  12  -1    5.40    4.10
   3  12  -1   11.20    2.30
   3  12  -1   14.30    5.00
   3  12  -1   11.20    2.40
   3  12  -1   13.50    2.40
   3  12  -1   14.50    2.60
  -3 -12   1   13.50    2.30
  -3 -12   1   15.40    3.30
  -3 -12   1   12.90    2.70
  -3 -12   1   16.90    4.20
  -3 -12   1   10.60    2.30
   2  12  -1    3.90    2.50
   2  12  -1   -1.50    1.70
   2  12  -1    0.20    4.20
   2  12  -1    4.10    1.70
   2  12  -1    1.80    1.70
   2  12  -1   -0.40    3.60
  -2 -12   1   -0.30    3.30
  -2 -12   1   -0.20    1.90
  -2 -12   1    1.20    2.70
  -2 -12   1    4.90    1.90
  -2 -12   1    0.80    1.60
  -2 -12   1   -1.10    2.80
   1  12  -1   -0.40    0.60
   1  12  -1    2.30    2.50
   1  12  -1   -1.50    1.80
   1  12  -1    1.20    1.60
   1  12  -1   -3.10    2.10
   1  12  -1    1.90    4.00
   1  12  -1    0.40    3.60
  -1 -12   1   -1.70    1.80
  -1 -12   1    1.80    2.10
  -1 -12   1    0.10    1.40
  -1 -12   1   -0.40    1.40
  -1 -12   1   -3.10    3.20
  -1 -12   1    2.60    2.50
   0  12  -1    1.10    1.50
   0  12  -1    1.90    1.50
   0  12  -1    0.10    3.60
   0  12  -1    2.10    1.40
   0  12  -1    3.60    3.90
   0  12  -1    2.10    2.30
   0  12  -1    0.50    2.60
   0 -12   1    1.90    1.40
   0 -12   1    2.50    1.90
   0 -12   1    3.40    2.30
   0 -12   1   -1.20    2.50
   0 -12   1   -2.10    3.20
  -1  12  -1    1.60    3.80
  -1  12  -1    6.90    2.40
  -1  12  -1    5.40    1.80
  -1  12  -1    3.40    1.50
  -1  12  -1    3.90    1.50
  -1  12  -1    3.30    2.30
  -1  12  -1   -6.50    3.50
   1 -12   1    2.80    1.20
   1 -12   1    1.80    2.10
   1 -12   1    4.10    1.30
   1 -12   1    3.60    2.00
   1 -12   1    4.50    2.00
   1 -12   1   -0.10    3.60
  -2  12  -1   24.60    3.20
  -2  12  -1   21.80    4.80
  -2  12  -1   22.90    2.60
  -2  12  -1   17.40    4.30
  -2  12  -1   19.10    2.20
  -2  12  -1   22.80    2.20
  -2  12  -1   18.80    3.30
   2 -12   1   20.50    3.40
   2 -12   1   20.30    2.60
   2 -12   1   18.20    2.80
   2 -12   1   23.80    2.00
   2 -12   1   19.40    1.90
  -3  12  -1   12.90    2.60
  -3  12  -1   10.50    4.00
  -3  12  -1   10.90    3.90
  -3  12  -1   14.50    3.20
  -3  12  -1   12.10    1.90
  -3  12  -1   12.20    2.40
  -3  12  -1    9.70    1.60
   3 -12   1   12.00    2.20
   3 -12   1   11.70    1.50
   3 -12   1   11.60    3.00
   3 -12   1   12.90    1.70
   3 -12   1   11.20    1.40
   3 -12   1   15.10    2.60
  -4  12  -1   10.20    3.80
  -4  12  -1    7.80    1.50
  -4  12  -1   10.60    2.30
  -4  12  -1    5.30    3.60
  -4  12  -1    8.60    2.60
  -4  12  -1    8.30    2.40
  -4  12  -1   12.30    4.00
  -4  12  -1    4.10    1.50
   4 -12   1    6.60    2.20
   4 -12   1    9.20    2.70
   4 -12   1    6.40    2.10
   4 -12   1    5.50    1.00
   4 -12   1    5.00    1.00
  -5  12  -1   11.60    2.00
  -5  12  -1    7.00    2.20
  -5  12  -1   10.80    2.70
  -5  12  -1    3.70    3.80
  -5  12  -1   10.90    2.40
  -5  12  -1   10.70    3.80
  -5  12  -1    9.10    1.40
   5 -12   1    7.00    2.90
   5 -12   1    7.90    0.80
   5 -12   1    9.90    2.10
   5 -12   1    8.40    0.80
  -6  12  -1    7.90    1.50
  -6  12  -1    7.70    2.60
  -6  12  -1   10.50    1.60
  -6  12  -1    7.40    2.40
  -6  12  -1   10.00    2.90
  -6  12  -1    5.00    3.90
  -6  12  -1    5.80    3.90
   6 -12   1    9.30    3.00
   6 -12   1    9.20    2.40
  -7  12  -1   48.20    4.30
  -7  12  -1   49.40    3.70
  -7  12  -1   54.39   10.10
  -7  12  -1   47.20    2.70
  -7  12  -1   44.30    4.50
  -7  12  -1   46.70    7.00
  -7  12  -1   45.60    2.60
   7 -12   1   48.20    4.50
   7 -12   1   48.50    4.20
  -8  12  -1    4.60    4.10
  -8  12  -1    0.70    2.20
  -8  12  -1    1.60    1.40
  -8  12  -1    3.20    2.90
  -8  12  -1    2.70    3.40
   8 -12   1    1.50    2.30
   8 -12   1   -0.20    2.30
  -9  12  -1   66.29    7.70
  -9  12  -1   72.09    5.80
  -9  12  -1   65.99    5.50
  -9  12  -1   72.89    4.50
  -9  12  -1   64.39    3.20
  -9  12  -1   67.89    7.50
   9 -12   1   67.69    5.00
   9 -12   1   76.99    5.80
 -10  12  -1    0.80    1.80
 -10  12  -1    3.90    3.30
 -10  12  -1    1.00    2.20
 -10  12  -1    1.80    1.30
 -10  12  -1    3.20    4.10
 -10  12  -1    1.40    4.20
 -10  12  -1   -2.00    2.10
 -10  12  -1   -0.20    5.20
  10 -12   1    1.90    2.90
  10 -12   1    3.60    2.80
 -11  12  -1   47.30    2.80
 -11  12  -1   47.20    3.00
 -11  12  -1   54.09    5.60
 -11  12  -1   44.50    3.60
 -11  12  -1   52.69    3.70
 -11  12  -1   54.19    7.00
 -11  12  -1   41.20    5.40
  11 -12   1   57.09    5.50
  11 -12   1   43.80    4.10
 -12  12  -1    6.20    3.60
 -12  12  -1    7.40    1.60
 -12  12  -1    6.30    2.20
 -12  12  -1    7.20    2.30
 -12  12  -1    7.90    4.60
  12 -12   1   11.80    3.70
  12 -12   1    7.00    2.70
 -13  12  -1    5.00    1.70
 -13  12  -1    5.80    3.60
 -13  12  -1    8.00    2.10
 -13  12  -1    8.10    2.20
 -13  12  -1    5.50    1.50
 -13  12  -1    3.90    3.90
  13 -12   1    5.10    2.40
  13 -12   1    8.60    3.80
 -14  12  -1   -0.60    1.70
 -14  12  -1    2.20    1.50
 -14  12  -1   -1.30    3.50
 -14  12  -1    1.00    1.30
 -14  12  -1   -1.60    1.80
 -14  12  -1    2.50    3.40
  14 -12   1   -1.30    4.40
 -15  12  -1   13.90    4.50
 -15  12  -1   14.20    4.80
 -15  12  -1   10.90    1.90
 -15  12  -1   11.80    2.00
 -15  12  -1   14.30    2.30
 -15  12  -1   10.00    2.10
  15 -12   1   18.50    4.80
  14  11  -1   -1.80    3.70
  14  11  -1   -3.30    1.70
  14  11  -1   -0.50    4.20
  14  11  -1   -4.10    2.40
  14  11  -1   -1.10    2.80
  14  11  -1    1.10    2.80
 -14 -11   1    1.50    5.40
 -14 -11   1   -1.30    2.80
 -14 -11   1    3.10    2.60
 -14 -11   1   -2.50    3.30
 -14 -11   1    1.50    3.00
 -14 -11   1    0.40    2.90
 -14 -11   1    2.20    3.70
 -14 -11   1   -0.50    3.00
 -14 -11   1   12.00    7.50
 -14 -11   1   -2.00    2.70
  13  11  -1   23.90    3.80
  13  11  -1   19.30    5.40
  13  11  -1   18.00    5.40
  13  11  -1   15.20    3.90
  13  11  -1   29.80    4.30
  13  11  -1   25.70    3.70
 -13 -11   1   22.40    4.00
 -13 -11   1   29.60    8.10
 -13 -11   1   37.00    7.30
 -13 -11   1   19.20    4.10
 -13 -11   1   27.80    4.40
 -13 -11   1   26.50    7.40
 -13 -11   1   20.80    4.50
 -13 -11   1   26.30    3.40
 -13 -11   1   23.50    4.10
 -13 -11   1   28.90    3.40
  12  11  -1   -0.80    2.90
  12  11  -1    0.40    2.00
  12  11  -1   -1.40    4.10
  12  11  -1   -1.30    2.40
  12  11  -1    0.70    4.10
  12  11  -1    2.00    2.90
 -12 -11   1   -2.70    3.30
 -12 -11   1    3.60    3.30
 -12 -11   1    3.80    2.50
 -12 -11   1   -3.70    5.00
 -12 -11   1    0.20    2.90
 -12 -11   1   -1.60    3.20
 -12 -11   1   -2.30    3.10
 -12 -11   1   -1.30    2.40
 -12 -11   1   -1.00    3.60
 -12 -11   1   -2.90    6.10
  11  11  -1    8.20    2.50
  11  11  -1   12.40    5.00
  11  11  -1   15.80    5.10
  11  11  -1   12.70    2.90
  11  11  -1   15.80    3.80
  11  11  -1   12.20    3.20
 -11 -11   1    9.60    2.60
 -11 -11   1   17.60    6.90
 -11 -11   1   10.60    3.40
 -11 -11   1   19.90    3.90
 -11 -11   1   13.30    2.70
 -11 -11   1    6.60    6.70
 -11 -11   1    6.50    3.80
 -11 -11   1   10.60    5.00
 -11 -11   1   12.90    2.90
 -11 -11   1   13.50    3.70
  10  11  -1    1.90    3.00
  10  11  -1    1.50    2.50
  10  11  -1   -0.30    2.00
  10  11  -1   -1.80    2.30
  10  11  -1    5.00    4.50
  10  11  -1    6.60    4.70
 -10 -11   1   -8.20    4.40
 -10 -11   1    0.30    1.80
 -10 -11   1    2.40    2.20
 -10 -11   1   -1.30    3.20
 -10 -11   1    3.40    3.30
 -10 -11   1   -1.00    2.50
 -10 -11   1    6.60   10.60
 -10 -11   1    4.30    3.30
 -10 -11   1   -1.50    1.90
   9  11  -1    7.70    2.10
   9  11  -1   13.40    2.50
   9  11  -1   11.70    3.00
   9  11  -1    9.00    3.50
   9  11  -1    8.00    5.00
  -9 -11   1    7.60    3.30
  -9 -11   1    6.20    1.90
  -9 -11   1    5.10    6.00
  -9 -11   1    7.10    3.60
  -9 -11   1   16.40    5.90
  -9 -11   1   14.60    3.20
  -9 -11   1   10.90    2.10
  -9 -11   1    8.40    3.10
  -9 -11   1   11.80    3.00
  -9 -11   1    9.10    3.40
   8  11  -1   -2.20    2.00
   8  11  -1    0.10    1.80
   8  11  -1   -1.30    1.20
   8  11  -1    0.70    2.30
   8  11  -1   -6.20    5.50
   8  11  -1   -3.30    4.80
   8  11  -1    0.50    1.80
  -8 -11   1   -0.50    4.30
  -8 -11   1    1.30    3.00
  -8 -11   1   -1.20    2.30
  -8 -11   1    1.40    2.50
  -8 -11   1    1.60    2.70
  -8 -11   1    5.20    5.00
  -8 -11   1    3.20    2.40
  -8 -11   1    0.90    1.50
  -8 -11   1   -0.60    2.20
   7  11  -1   -3.60    1.90
   7  11  -1    1.00    1.00
   7  11  -1    1.90    2.10
   7  11  -1   -0.50    1.60
   7  11  -1   -3.10    4.70
   7  11  -1    1.70    2.50
   7  11  -1   -3.50    4.20
  -7 -11   1   -1.20    1.10
  -7 -11   1   -1.20    3.80
  -7 -11   1   -1.00    2.60
  -7 -11   1   -0.30    2.20
  -7 -11   1   -0.40    1.90
  -7 -11   1   -0.50    2.40
  -7 -11   1   -2.60    3.00
  -7 -11   1   -2.80    2.10
  -7 -11   1   -3.60    2.20
   6  11  -1    1.00    1.30
   6  11  -1   -0.40    4.80
   6  11  -1   -0.10    2.40
   6  11  -1    1.90    4.20
   6  11  -1   -0.50    1.50
   6  11  -1   -1.30    1.20
   6  11  -1    0.40    1.00
  -6 -11   1    0.00    2.40
  -6 -11   1   -1.90    1.80
  -6 -11   1    0.80    0.80
  -6 -11   1    0.80    1.20
  -6 -11   1   -2.20    2.60
  -6 -11   1   -1.10    3.50
  -6 -11   1   -3.50    3.50
  -6 -11   1   -0.40    4.00
  -6 -11   1    3.30    2.10
   5  11  -1   31.00    3.20
   5  11  -1   27.20    3.00
   5  11  -1   28.60    3.10
   5  11  -1   28.40    2.60
   5  11  -1   24.40    5.70
   5  11  -1   27.00    5.80
   5  11  -1   22.70    1.40
  -5 -11   1   24.60    2.20
  -5 -11   1   21.10    2.80
  -5 -11   1   23.80    2.50
  -5 -11   1   29.30    3.70
  -5 -11   1   34.40    5.30
  -5 -11   1   27.20    2.90
  -5 -11   1   31.20    5.00
  -5 -11   1   25.60    3.90
   4  11  -1   31.20    3.10
   4  11  -1   27.70    2.80
   4  11  -1   27.50    3.00
   4  11  -1   29.60    3.50
   4  11  -1   27.40    5.00
  -4 -11   1   28.50    2.70
  -4 -11   1   33.10    3.70
  -4 -11   1   29.60    4.00
  -4 -11   1   28.70    3.00
  -4 -11   1   36.60    4.90
  -4 -11   1   39.90    5.20
  -4 -11   1   35.30    3.10
  -4 -11   1   27.50    1.80
   3  11  -1   42.80    3.30
   3  11  -1   36.10    3.10
   3  11  -1   36.00    5.50
   3  11  -1   46.00    6.30
   3  11  -1   37.20    3.80
   3  11  -1   35.40    3.10
  -3 -11   1   36.50    2.80
  -3 -11   1   29.30    2.90
  -3 -11   1   43.00    3.90
  -3 -11   1   30.90    3.90
  -3 -11   1   40.20    6.10
  -3 -11   1   34.30    5.40
   2  11  -1    4.60    3.90
   2  11  -1    1.70    1.60
   2  11  -1    0.30    2.20
   2  11  -1    3.60    1.60
   2  11  -1   -2.40    3.20
   2  11  -1    0.00    2.10
  -2 -11   1    0.10    1.60
  -2 -11   1    8.80    2.50
  -2 -11   1   -0.10    1.40
  -2 -11   1    1.40    3.20
  -2 -11   1    1.00    1.50
  -2 -11   1    2.00    2.20
   1  11  -1    0.60    2.20
   1  11  -1    4.20    0.80
   1  11  -1    4.40    1.90
   1  11  -1    1.90    2.30
   1  11  -1    6.30    1.80
   1  11  -1    6.20    3.90
   1  11  -1    5.70    3.50
  -1 -11   1    4.00    1.50
  -1 -11   1    4.70    2.70
  -1 -11   1    2.00    1.70
  -1 -11   1    2.00    3.40
  -1 -11   1    5.80    1.80
  -1 -11   1    8.80    2.50
   0  11  -1   11.40    3.90
   0  11  -1   11.20    3.70
   0  11  -1   10.00    1.80
   0  11  -1   11.00    2.60
   0  11  -1    8.20    1.90
   0  11  -1    9.40    2.00
   0  11  -1   12.60    1.70
   0 -11   1    8.40    3.70
   0 -11   1   12.30    1.80
   0 -11   1    7.70    2.90
   0 -11   1   10.60    2.10
   0 -11   1    8.50    1.80
  -1  11  -1   18.10    2.20
  -1  11  -1   18.70    4.10
  -1  11  -1   18.40    2.60
  -1  11  -1   18.90    2.10
  -1  11  -1   16.00    2.90
  -1  11  -1   10.30    3.90
  -1  11  -1   16.10    1.90
   1 -11   1   17.80    3.30
   1 -11   1   16.60    1.80
   1 -11   1   18.90    2.40
   1 -11   1   16.80    2.80
   1 -11   1   20.10    4.00
   1 -11   1   12.70    1.80
  -2  11  -1    3.90    1.20
  -2  11  -1    1.80    3.20
  -2  11  -1    3.00    1.60
  -2  11  -1    1.40    1.90
  -2  11  -1   -0.30    1.00
  -2  11  -1    2.10    2.00
  -2  11  -1   -0.80    3.10
   2 -11   1    2.70    1.00
   2 -11   1    1.20    1.10
   2 -11   1    0.90    1.90
   2 -11   1   -1.40    1.80
   2 -11   1    0.50    3.00
   2 -11   1    4.50    2.40
  -3  11  -1    7.80    3.50
  -3  11  -1    9.60    2.30
  -3  11  -1    4.90    3.20
  -3  11  -1    8.20    2.30
  -3  11  -1    7.40    1.50
  -3  11  -1   10.20    1.50
  -3  11  -1   12.10    2.20
   3 -11   1    9.80    1.20
   3 -11   1   10.00    2.10
   3 -11   1    9.20    2.60
   3 -11   1    9.20    2.20
   3 -11   1    8.70    1.30
   3 -11   1   12.30    1.60
  -4  11  -1    7.90    2.40
  -4  11  -1    5.40    1.40
  -4  11  -1    3.40    1.30
  -4  11  -1    6.40    2.50
  -4  11  -1    8.40    2.40
  -4  11  -1    3.20    3.20
  -4  11  -1    5.80    3.60
   4 -11   1    9.00    2.10
   4 -11   1    7.80    2.50
   4 -11   1    4.10    2.00
   4 -11   1    4.50    0.90
   4 -11   1    5.90    1.00
  -5  11  -1   28.60    2.20
  -5  11  -1   31.20    3.20
  -5  11  -1   34.90    5.20
  -5  11  -1   31.50    3.60
  -5  11  -1   32.40    4.90
  -5  11  -1   28.50    3.00
   5 -11   1   31.40    3.50
   5 -11   1   25.90    1.20
   5 -11   1   30.00    1.20
   5 -11   1   33.70    3.00
  -6  11  -1   32.90    5.00
  -6  11  -1   30.50    3.90
  -6  11  -1   34.80    5.10
  -6  11  -1   30.30    2.10
  -6  11  -1   30.50    3.00
  -6  11  -1   31.00    2.20
  -6  11  -1   28.60    3.80
   6 -11   1   28.20    3.40
   6 -11   1   31.70    3.10
  -7  11  -1    5.70    1.40
  -7  11  -1    4.00    3.90
  -7  11  -1    8.70    2.80
  -7  11  -1    4.80    3.80
  -7  11  -1    2.10    2.80
  -7  11  -1    2.70    2.30
   7 -11   1    7.90    2.60
   7 -11   1    5.20    2.20
  -8  11  -1   68.49    7.40
  -8  11  -1   71.69    7.30
  -8  11  -1   66.99    3.10
  -8  11  -1   80.59    5.40
  -8  11  -1   71.59    5.30
  -8  11  -1   79.79    7.80
  -8  11  -1   71.99    3.10
  -8  11  -1   76.79    4.20
   8 -11   1   68.79    4.80
   8 -11   1   72.89    5.30
  -9  11  -1   14.70    4.70
  -9  11  -1   11.90    3.50
  -9  11  -1    8.30    3.30
  -9  11  -1    8.20    2.60
  -9  11  -1   12.90    4.50
  -9  11  -1    9.90    1.50
  -9  11  -1    6.20    4.20
  -9  11  -1    9.10    1.70
   9 -11   1    9.60    3.60
   9 -11   1    9.20    2.90
 -10  11  -1   29.80    3.30
 -10  11  -1   42.10    6.10
 -10  11  -1   31.70    3.20
 -10  11  -1   29.20    2.30
 -10  11  -1   23.80    4.20
 -10  11  -1   28.30    4.40
 -10  11  -1   29.80    2.40
  10 -11   1   34.80    3.70
  10 -11   1   28.70    4.10
 -11  11  -1    2.50    4.40
 -11  11  -1   -0.80    2.10
 -11  11  -1   -1.90    1.90
 -11  11  -1    5.90    3.50
 -11  11  -1    2.60    1.30
 -11  11  -1    2.40    3.30
 -11  11  -1    0.70    1.30
  11 -11   1    1.50    2.20
  11 -11   1    2.40    3.00
 -12  11  -1   23.30    4.50
 -12  11  -1   22.80    2.30
 -12  11  -1   28.60    5.60
 -12  11  -1   22.50    4.70
 -12  11  -1   18.20    2.60
 -12  11  -1   21.00    2.20
 -12  11  -1   23.80    2.80
  12 -11   1   28.70    3.50
  12 -11   1   25.60    4.40
 -13  11  -1    8.10    2.10
 -13  11  -1    3.40    3.40
 -13  11  -1    6.40    1.70
 -13  11  -1    5.70    2.10
 -13  11  -1    7.20    1.70
  13 -11   1    7.10    4.50
  13 -11   1    7.10    2.30
 -14  11  -1   10.40    1.90
 -14  11  -1    5.90    4.20
 -14  11  -1    6.20    2.00
 -14  11  -1   10.40    1.80
 -14  11  -1    7.70    3.70
 -14  11  -1    8.80    1.90
  14 -11   1   15.40    4.30
 -15  11  -1    0.50    1.50
 -15  11  -1    1.50    1.40
 -15  11  -1    2.10    1.60
 -15  11  -1    1.10    1.70
 -15  11  -1    3.30    4.00
 -15  11  -1    6.70    4.00
  15 -11   1    8.80    4.10
  14  10  -1    7.20    4.80
  14  10  -1   15.30    3.70
  14  10  -1   20.70    5.10
  14  10  -1   18.00    3.80
  14  10  -1   17.90    3.40
  14  10  -1   13.80    3.80
 -14 -10   1   20.60    3.40
 -14 -10   1   12.90    3.70
 -14 -10   1   19.10    6.40
 -14 -10   1    7.50    3.40
 -14 -10   1    5.20    3.90
 -14 -10   1   17.20    3.60
 -14 -10   1   18.10    3.80
 -14 -10   1    7.30    3.40
 -14 -10   1   17.20    7.50
 -14 -10   1   14.10    3.30
  13  10  -1    1.60    3.50
  13  10  -1   -6.00    3.60
  13  10  -1    3.20    4.20
  13  10  -1    1.80    3.00
  13  10  -1    5.30    2.80
  13  10  -1    2.00    2.50
 -13 -10   1   -1.40    2.90
 -13 -10   1   -1.70    3.10
 -13 -10   1   -1.70    4.30
 -13 -10   1    4.00    3.00
 -13 -10   1   -0.20    6.80
 -13 -10   1   -0.80    6.80
 -13 -10   1    4.30    6.60
 -13 -10   1    2.40    2.50
 -13 -10   1   -0.10    3.50
 -13 -10   1    2.20    2.90
  12  10  -1   33.20    4.50
  12  10  -1   26.30    3.50
  12  10  -1   26.40    4.00
  12  10  -1   25.30    5.40
  12  10  -1   23.40    5.30
  12  10  -1   31.80    4.20
 -12 -10   1   27.10    4.20
 -12 -10   1   27.50    3.80
 -12 -10   1   28.00    4.60
 -12 -10   1   27.60    4.20
 -12 -10   1   30.60    4.60
 -12 -10   1   29.10    3.90
 -12 -10   1   26.60    6.70
 -12 -10   1   27.70    4.50
 -12 -10   1   24.90    4.50
 -12 -10   1   31.40    7.70
  11  10  -1    7.80    4.30
  11  10  -1   15.00    4.80
  11  10  -1   13.90    3.40
  11  10  -1   12.20    3.20
  11  10  -1   13.50    3.00
  11  10  -1   12.40    2.60
 -11 -10   1   11.50    3.30
 -11 -10   1   13.50    3.70
 -11 -10   1   10.30    3.50
 -11 -10   1    9.40    5.50
 -11 -10   1   13.90    2.80
 -11 -10   1    8.80    3.20
 -11 -10   1   12.70    3.50
 -11 -10   1   14.70    3.50
 -11 -10   1   13.20    5.70
 -11 -10   1   12.30    2.40
  10  10  -1   12.70    2.70
  10  10  -1   13.30    2.90
  10  10  -1    7.50    5.50
  10  10  -1   10.70    4.80
  10  10  -1   14.70    2.60
  10  10  -1   10.80    3.30
 -10 -10   1    7.70    6.00
 -10 -10   1    9.20    2.40
 -10 -10   1   11.40    3.30
 -10 -10   1   14.80    3.60
 -10 -10   1    9.90    3.50
 -10 -10   1   12.40    3.80
 -10 -10   1   14.50    3.20
 -10 -10   1   11.50    5.20
 -10 -10   1    9.10    2.50
 -10 -10   1   13.50    3.20
   9  10  -1    3.90    2.40
   9  10  -1   -1.90    4.30
   9  10  -1   -4.80    4.40
   9  10  -1    2.80    2.50
   9  10  -1    1.00    2.70
   9  10  -1   -0.40    1.90
  -9 -10   1   -0.30    3.10
  -9 -10   1    0.20    4.40
  -9 -10   1    6.40    5.60
  -9 -10   1    3.00    2.50
  -9 -10   1    5.00    3.00
  -9 -10   1   -1.50    2.90
  -9 -10   1    0.60    1.90
  -9 -10   1   -1.90    1.80
  -9 -10   1    3.10    1.90
  -9 -10   1    2.90    3.00
   8  10  -1   18.80    5.40
   8  10  -1   26.70    3.80
   8  10  -1   27.40    3.10
   8  10  -1   30.90    3.50
   8  10  -1   18.00    6.00
   8  10  -1   24.80    2.90
   8  10  -1   28.90    2.70
  -8 -10   1   25.90    3.50
  -8 -10   1   29.20    5.80
  -8 -10   1   22.40    2.40
  -8 -10   1   30.60    5.50
  -8 -10   1   20.10    3.70
  -8 -10   1   29.20    3.70
  -8 -10   1   28.20    3.80
  -8 -10   1   22.70    3.30
  -8 -10   1   28.60    3.50
  -8 -10   1   19.90    2.40
   7  10  -1    2.50    2.00
   7  10  -1    8.50    4.50
   7  10  -1    3.80    4.60
   7  10  -1    4.80    2.50
   7  10  -1    4.10    2.10
   7  10  -1    5.90    1.80
  -7 -10   1    1.60    4.60
  -7 -10   1    5.00    2.70
  -7 -10   1    4.20    2.50
  -7 -10   1    7.80    2.30
  -7 -10   1    5.90    2.30
  -7 -10   1    7.20    4.00
  -7 -10   1    4.50    1.70
  -7 -10   1    2.40    1.70
  -7 -10   1    4.40    1.70
  -7 -10   1    3.10    1.30
   6  10  -1   -0.40    2.00
   6  10  -1    0.90    4.00
   6  10  -1    2.10    1.80
   6  10  -1    0.50    1.50
   6  10  -1   -0.80    4.30
   6  10  -1   -0.40    0.90
   6  10  -1   -1.10    1.70
  -6 -10   1    1.30    3.30
  -6 -10   1   -0.30    2.00
  -6 -10   1    1.20    1.60
  -6 -10   1   -1.80    2.20
  -6 -10   1    3.20    2.00
  -6 -10   1    1.30    1.40
  -6 -10   1   -5.40    3.70
  -6 -10   1   -0.70    2.60
  -6 -10   1   -0.70    0.90
  -6 -10   1   -1.70    2.00
   5  10  -1    1.40    1.70
   5  10  -1    3.40    1.50
   5  10  -1    7.00    4.70
   5  10  -1   -1.60    1.50
   5  10  -1    2.30    0.90
   5  10  -1    3.40    3.70
   5  10  -1    0.50    2.20
  -5 -10   1   -3.20    3.60
  -5 -10   1   -0.30    1.60
  -5 -10   1    2.20    1.60
  -5 -10   1   -0.70    1.60
  -5 -10   1    1.70    0.70
  -5 -10   1    1.40    3.30
  -5 -10   1    3.60    1.70
  -5 -10   1    1.20    1.90
  -5 -10   1    3.80    1.00
  -5 -10   1    3.70    2.30
   4  10  -1   -3.30    4.00
   4  10  -1    3.30    2.00
   4  10  -1    3.40    4.50
   4  10  -1    1.30    1.50
   4  10  -1   -0.30    0.50
   4  10  -1   -3.00    1.40
  -4 -10   1    3.10    2.30
  -4 -10   1    0.10    0.70
  -4 -10   1   -1.60    1.40
  -4 -10   1   -0.20    1.50
  -4 -10   1    0.00    2.90
  -4 -10   1   -1.20    1.90
  -4 -10   1   -0.60    1.20
  -4 -10   1   -1.10    3.00
   3  10  -1   -2.20    3.60
   3  10  -1   -0.30    1.90
   3  10  -1   -0.70    3.20
   3  10  -1   -0.60    1.90
   3  10  -1    0.30    1.30
   3  10  -1   -1.70    1.30
  -3 -10   1   -1.30    1.30
  -3 -10   1    1.50    2.80
  -3 -10   1   -0.10    0.80
  -3 -10   1   -2.50    1.70
  -3 -10   1   -3.20    1.90
  -3 -10   1   -1.80    1.40
  -3 -10   1    0.50    0.60
  -3 -10   1   -2.10    1.70
  -3 -10   1   -0.30    2.20
   2  10  -1   17.40    4.20
   2  10  -1   17.70    2.90
   2  10  -1   13.40    3.80
   2  10  -1   17.10    2.20
   2  10  -1   20.80    3.00
   2  10  -1   23.00    2.40
  -2 -10   1   17.30    2.80
  -2 -10   1   22.30    2.30
  -2 -10   1   18.90    2.30
  -2 -10   1   19.80    3.10
  -2 -10   1   22.20    2.70
  -2 -10   1   20.90    3.90
   1  10  -1   -1.40    1.30
   1  10  -1    0.40    0.70
   1  10  -1   -1.00    2.40
   1  10  -1   -2.10    1.30
   1  10  -1   -2.70    2.80
   1  10  -1    3.30    3.40
   1  10  -1    0.80    2.00
  -1 -10   1    4.20    2.90
  -1 -10   1   -0.30    2.10
  -1 -10   1   -1.20    1.30
  -1 -10   1    0.70    2.20
  -1 -10   1    1.60    1.50
  -1 -10   1    0.40    1.30
   0  10  -1    9.30    3.20
   0  10  -1    6.80    2.30
   0  10  -1    4.00    2.60
   0  10  -1    9.80    2.30
   0  10  -1    8.10    1.40
   0  10  -1    6.20    1.50
   0  10  -1    8.50    1.60
   0 -10   1    6.00    2.20
   0 -10   1    4.40    1.30
   0 -10   1    3.30    2.40
   0 -10   1    7.10    3.20
   0 -10   1    7.90    1.60
   0 -10   1    5.30    1.40
  -1  10  -1   -2.60    2.90
  -1  10  -1   -0.70    1.20
  -1  10  -1    1.10    0.70
  -1  10  -1    0.60    1.10
  -1  10  -1    0.20    2.00
  -1  10  -1    1.00    1.90
  -1  10  -1    0.20    1.40
  -1  10  -1    0.70    0.50
  -1  10  -1    1.90    1.20
   1 -10   1   -0.90    1.20
   1 -10   1   -2.70    2.60
   1 -10   1    0.00    2.70
   1 -10   1    0.70    1.30
   1 -10   1   -0.20    1.70
   1 -10   1    3.70    2.10
  -2  10  -1   28.00    3.00
  -2  10  -1   29.00    2.40
  -2  10  -1   27.20    2.30
  -2  10  -1   34.50    2.90
  -2  10  -1   30.00    4.10
  -2  10  -1   34.60    4.40
  -2  10  -1   30.50    2.10
   2 -10   1   34.80    4.80
   2 -10   1   26.40    2.50
   2 -10   1   30.00    1.80
   2 -10   1   30.00    3.30
   2 -10   1   30.10    1.90
   2 -10   1   30.00    3.00
  -3  10  -1    8.40    1.30
  -3  10  -1   12.30    3.50
  -3  10  -1   12.10    2.30
  -3  10  -1   10.80    3.40
  -3  10  -1   11.70    2.20
  -3  10  -1    9.50    1.70
  -3  10  -1   10.40    1.50
   3 -10   1   10.50    2.00
   3 -10   1   11.50    1.60
   3 -10   1    9.80    2.10
   3 -10   1    9.70    1.10
   3 -10   1   10.20    1.20
   3 -10   1   12.70    2.60
  -4  10  -1   62.09    5.80
  -4  10  -1   61.19    5.20
  -4  10  -1   68.19    3.90
  -4  10  -1   68.79    5.70
  -4  10  -1   68.59    2.90
  -4  10  -1   73.09    4.30
   4 -10   1   63.59    2.30
   4 -10   1   75.19    4.40
   4 -10   1   70.59    2.30
   4 -10   1   72.79    3.90
   4 -10   1   75.69    4.10
  -5  10  -1   35.30    2.20
  -5  10  -1   35.50    4.80
  -5  10  -1   32.70    2.10
  -5  10  -1   27.40    3.50
  -5  10  -1   31.80    3.20
  -5  10  -1   33.40    3.00
  -5  10  -1   33.10    4.90
   5 -10   1   30.40    1.20
   5 -10   1   39.30    3.50
   5 -10   1   33.10    2.80
   5 -10   1   30.90    1.20
  -6  10  -1   85.49    7.10
  -6  10  -1   78.39    4.70
  -6  10  -1   74.39    3.00
  -6  10  -1   76.39    5.30
  -6  10  -1   73.89    6.40
  -6  10  -1   73.89    4.10
   6 -10   1   74.89    4.50
   6 -10   1   80.29    4.60
  -7  10  -1   38.90    2.20
  -7  10  -1   36.20    3.40
  -7  10  -1   41.70    4.10
  -7  10  -1   32.90    5.00
  -7  10  -1   41.30    5.50
  -7  10  -1   36.10    2.20
  -7  10  -1   31.40    4.00
   7 -10   1   36.70    3.60
   7 -10   1   37.60    3.40
  -8  10  -1   27.30    4.90
  -8  10  -1   26.80    3.80
  -8  10  -1   25.30    2.10
  -8  10  -1   27.20    3.70
  -8  10  -1   23.50    2.60
  -8  10  -1   21.70    4.50
  -8  10  -1   24.90    2.00
   8 -10   1   24.70    3.30
   8 -10   1   25.10    3.70
  -9  10  -1   15.40    4.50
  -9  10  -1   16.40    1.80
  -9  10  -1   18.00    1.90
  -9  10  -1   18.60    3.70
  -9  10  -1   14.50    4.40
  -9  10  -1   19.60    2.70
  -9  10  -1   18.10    3.70
   9 -10   1   20.50    3.00
   9 -10   1   18.00    3.30
 -10  10  -1    5.80    2.10
 -10  10  -1    4.40    3.90
 -10  10  -1    9.20    3.40
 -10  10  -1    7.00    1.40
 -10  10  -1    6.50    1.50
 -10  10  -1    4.60    2.10
 -10  10  -1    7.60    3.30
 -10  10  -1    2.10    6.30
  10 -10   1    7.80    2.40
  10 -10   1   11.90    3.20
 -11  10  -1   29.60    5.60
 -11  10  -1   25.20    4.40
 -11  10  -1   21.60    2.70
 -11  10  -1   20.00    5.10
 -11  10  -1   28.10    3.00
 -11  10  -1   24.70    2.30
 -11  10  -1   23.60    2.20
  11 -10   1   23.30    3.00
  11 -10   1   25.00    4.10
 -12  10  -1   21.20    2.30
 -12  10  -1   21.50    2.60
 -12  10  -1   24.60    2.80
 -12  10  -1   15.40    4.80
 -12  10  -1   16.30    2.10
 -12  10  -1   15.40    4.40
 -12  10  -1   25.10    4.60
  12 -10   1   18.80    4.50
  12 -10   1   21.10    2.90
 -13  10  -1   16.60    4.40
 -13  10  -1   14.10    2.00
 -13  10  -1   13.30    2.20
 -13  10  -1   12.80    1.90
 -13  10  -1   18.00    4.30
 -13  10  -1   12.80    2.20
  13 -10   1   19.70    4.50
 -14  10  -1    0.10    1.50
 -14  10  -1   -2.30    1.60
 -14  10  -1    5.20    3.60
 -14  10  -1    1.00    3.30
 -14  10  -1    0.00    1.30
 -14  10  -1   -0.40    1.40
  14 -10   1    0.40    3.50
 -15  10  -1   30.10    2.70
 -15  10  -1   28.70    2.80
 -15  10  -1   30.50    2.80
 -15  10  -1   31.10    5.40
 -15  10  -1   35.10    5.60
 -15  10  -1   28.70    2.70
  15 -10   1   37.00    5.70
  14   9  -1   -4.50    2.10
  14   9  -1   -0.50    2.40
  14   9  -1    1.50    2.70
  14   9  -1   -0.30    3.20
  14   9  -1   -0.90    3.50
 -14  -9   1   -4.90    5.30
 -14  -9   1    5.50    2.60
 -14  -9   1    2.40    2.90
 -14  -9   1   -1.00    2.70
 -14  -9   1   -2.70    4.20
 -14  -9   1   -2.50    2.60
 -14  -9   1   -0.60    2.50
 -14  -9   1    6.20    3.00
 -14  -9   1  -10.20    6.60
 -14  -9   1   -4.40    3.20
  13   9  -1   31.50    4.30
  13   9  -1   37.00    5.80
  13   9  -1   32.10    4.60
  13   9  -1   35.90    5.90
  13   9  -1   35.90    4.50
  13   9  -1   34.70    4.10
 -13  -9   1   45.60    7.10
 -13  -9   1   30.00    4.20
 -13  -9   1   31.80    3.90
 -13  -9   1   30.30    4.70
 -13  -9   1   25.00    3.50
 -13  -9   1   24.30    5.40
 -13  -9   1   42.20    4.80
 -13  -9   1   38.60    4.80
 -13  -9   1   33.30    7.90
 -13  -9   1   31.50    6.20
  12   9  -1    1.30    4.00
  12   9  -1   -1.70    3.80
  12   9  -1    0.50    2.40
  12   9  -1    0.30    2.50
  12   9  -1    9.20    3.10
  12   9  -1    3.60    2.50
 -12  -9   1    5.60    2.40
 -12  -9   1   -1.90    2.80
 -12  -9   1    2.90    3.80
 -12  -9   1    1.70    2.90
 -12  -9   1    5.80    3.60
 -12  -9   1    0.80    6.60
 -12  -9   1    2.50    2.10
 -12  -9   1    2.60    5.10
 -12  -9   1    3.90    3.10
 -12  -9   1    6.90    3.10
  11   9  -1   -6.50    3.50
  11   9  -1    2.00    2.20
  11   9  -1    1.80    2.60
  11   9  -1    1.80    2.40
  11   9  -1    2.40    2.40
  11   9  -1   -3.10    3.80
 -11  -9   1    2.70    2.70
 -11  -9   1   -4.50    3.10
 -11  -9   1   -4.00    2.40
 -11  -9   1   -0.80    4.50
 -11  -9   1   -1.20    3.20
 -11  -9   1   -1.70    1.80
 -11  -9   1    3.00    2.40
 -11  -9   1    6.30    6.00
 -11  -9   1   -2.50    2.30
 -11  -9   1    0.90    1.90
  10   9  -1    3.90    2.20
  10   9  -1    1.00    1.60
  10   9  -1    7.50    2.50
  10   9  -1    1.60    2.50
  10   9  -1    6.80    4.30
  10   9  -1    5.70    4.30
 -10  -9   1    1.20    4.60
 -10  -9   1    5.50    2.80
 -10  -9   1   -1.40    5.50
 -10  -9   1    0.80    3.10
 -10  -9   1   -1.50    3.10
 -10  -9   1    2.10    2.20
 -10  -9   1    1.60    2.20
 -10  -9   1    4.00    2.70
 -10  -9   1    5.90    2.90
 -10  -9   1    7.10    2.70
   9   9  -1    1.60    2.20
   9   9  -1    2.80    1.80
   9   9  -1    1.20    2.60
   9   9  -1    8.00    4.30
   9   9  -1    0.50    4.10
   9   9  -1    4.20    1.70
  -9  -9   1    3.40    5.40
  -9  -9   1    3.00    2.40
  -9  -9   1   -8.20    4.00
  -9  -9   1    5.50    3.20
  -9  -9   1    0.20    2.50
  -9  -9   1    3.10    2.60
  -9  -9   1    2.90    2.50
  -9  -9   1    5.00    2.10
  -9  -9   1    1.80    2.40
   8   9  -1   -2.10    1.90
   8   9  -1    2.10    2.50
   8   9  -1   -1.90    4.00
   8   9  -1    2.40    1.70
   8   9  -1    1.50    1.80
   8   9  -1    1.40    2.10
   8   9  -1    3.90    4.10
  -8  -9   1    1.70    2.10
  -8  -9   1    1.40    1.60
  -8  -9   1    1.70    1.70
  -8  -9   1   -1.40    3.20
  -8  -9   1   -0.40    2.30
  -8  -9   1    0.00    2.40
  -8  -9   1   -1.40    2.10
  -8  -9   1    0.40    3.80
  -8  -9   1    3.10    2.30
  -8  -9   1    1.50    1.70
   7   9  -1    0.50    1.20
   7   9  -1    2.70    2.00
   7   9  -1    2.10    4.00
   7   9  -1   -0.90    1.70
   7   9  -1    1.80    2.20
   7   9  -1   -3.80    4.00
   7   9  -1   -0.10    1.40
  -7  -9   1   -0.90    1.30
  -7  -9   1    1.70    2.20
  -7  -9   1    1.10    4.20
  -7  -9   1   -0.90    2.00
  -7  -9   1   -1.30    1.30
  -7  -9   1   -2.00    2.10
  -7  -9   1    6.40    3.70
  -7  -9   1   -0.30    2.40
  -7  -9   1   -0.20    2.30
   6   9  -1    0.20    4.00
   6   9  -1   -0.30    1.10
   6   9  -1   -1.50    1.50
   6   9  -1   -0.50    3.60
   6   9  -1    0.70    1.00
   6   9  -1    0.20    1.90
   6   9  -1   -1.80    1.60
  -6  -9   1   -0.60    0.90
  -6  -9   1    0.50    1.70
  -6  -9   1   -1.90    2.10
  -6  -9   1    0.00    1.80
  -6  -9   1   -4.20    1.60
  -6  -9   1    0.40    2.10
  -6  -9   1    1.90    3.30
  -6  -9   1   -1.60    1.40
  -6  -9   1   -1.20    3.70
  -6  -9   1   -0.60    1.70
   5   9  -1   -1.40    3.90
   5   9  -1   -2.00    1.30
   5   9  -1   -3.00    1.80
   5   9  -1    2.90    1.70
   5   9  -1   -0.10    0.80
   5   9  -1    1.10    3.50
  -5  -9   1   -0.90    3.00
  -5  -9   1    0.20    2.00
  -5  -9   1    2.00    1.70
  -5  -9   1    3.30    3.00
  -5  -9   1   -2.10    3.40
  -5  -9   1   -0.50    0.80
  -5  -9   1   -2.00    1.50
  -5  -9   1    0.80    1.90
  -5  -9   1   -0.10    1.70
  -5  -9   1    0.90    1.10
   4   9  -1   10.10    3.40
   4   9  -1    7.10    1.80
   4   9  -1    9.00    1.90
   4   9  -1    5.30    3.90
   4   9  -1    5.40    1.60
   4   9  -1    7.10    2.20
   4   9  -1    8.50    1.00
  -4  -9   1   10.20    1.60
  -4  -9   1    8.70    1.90
  -4  -9   1    7.40    1.00
  -4  -9   1    6.30    1.50
  -4  -9   1    6.20    1.70
  -4  -9   1    8.40    2.70
  -4  -9   1    6.50    0.80
  -4  -9   1    6.70    1.80
  -4  -9   1    7.40    2.40
  -4  -9   1    8.10    3.10
   3   9  -1    4.50    0.50
   3   9  -1    8.70    3.90
   3   9  -1    6.00    1.60
   3   9  -1    6.60    1.70
   3   9  -1    7.80    3.30
   3   9  -1    5.70    1.70
   3   9  -1    4.10    2.00
  -3  -9   1    4.50    2.90
  -3  -9   1    8.00    2.20
  -3  -9   1    7.60    1.20
  -3  -9   1    5.10    1.50
  -3  -9   1    5.90    1.70
  -3  -9   1    7.50    2.40
  -3  -9   1    7.70    1.70
  -3  -9   1    8.80    3.20
   2   9  -1   30.90    4.40
   2   9  -1   37.50    3.40
   2   9  -1   38.70    2.90
   2   9  -1   36.90    2.80
   2   9  -1   41.90    5.90
   2   9  -1   38.00    2.80
  -2  -9   1   32.90    3.50
  -2  -9   1   35.00    2.90
  -2  -9   1   32.70    1.40
  -2  -9   1   32.30    4.70
  -2  -9   1   43.80    5.10
  -2  -9   1   36.00    2.50
  -2  -9   1   43.00    2.80
   1   9  -1   48.90    1.70
   1   9  -1   54.99    3.00
   1   9  -1   52.89    3.20
   1   9  -1   45.10    5.70
   1   9  -1   53.79    3.00
   1   9  -1   55.09    5.30
   1   9  -1   50.59    3.70
  -1  -9   1   47.30    5.10
  -1  -9   1   55.69    2.90
  -1  -9   1   49.10    3.80
  -1  -9   1   52.09    2.80
  -1  -9   1   58.59    3.90
  -1  -9   1   53.89    2.80
   0   9  -1   -3.90    2.80
   0   9  -1    2.40    3.10
   0   9  -1   -0.80    1.00
   0   9  -1    0.30    1.30
   0   9  -1    0.80    2.60
   0   9  -1    1.50    1.10
   0   9  -1    1.30    1.70
   0  -9   1    1.80    1.10
   0  -9   1    0.00    1.30
   0  -9   1    0.80    1.20
   0  -9   1    1.90    2.60
   0  -9   1   -1.00    1.20
   0  -9   1   -1.60    1.90
  -1   9  -1   34.20    1.50
  -1   9  -1   44.60    4.70
  -1   9  -1   42.00    2.30
  -1   9  -1   40.60    2.20
  -1   9  -1   45.80    5.10
  -1   9  -1   39.70    2.80
  -1   9  -1   41.60    2.40
  -1   9  -1   44.20    2.90
  -1   9  -1   38.60    1.60
   1  -9   1   39.20    4.70
   1  -9   1   40.10    3.00
   1  -9   1   35.20    3.00
   1  -9   1   44.70    2.60
   1  -9   1   38.70    2.10
  -2   9  -1   -1.20    1.00
  -2   9  -1   -0.30    1.90
  -2   9  -1    0.10    0.80
  -2   9  -1   -1.20    2.30
  -2   9  -1   -0.50    2.60
  -2   9  -1   -3.10    1.10
   2  -9   1   -3.80    1.50
   2  -9   1   -0.70    0.70
   2  -9   1    0.90    0.80
   2  -9   1   -0.50    0.90
   2  -9   1    0.30    1.90
   2  -9   1   -4.40    2.40
   2  -9   1   -3.10    1.40
  -3   9  -1   85.59    3.80
  -3   9  -1   85.19    4.20
  -3   9  -1   90.59    4.20
  -3   9  -1   88.89    6.10
  -3   9  -1   92.19    3.30
  -3   9  -1   93.19    3.30
   3  -9   1   90.89    3.50
   3  -9   1   88.39    4.10
   3  -9   1   87.29    4.20
   3  -9   1   94.59    3.10
   3  -9   1   89.49    4.60
   3  -9   1   88.59    2.90
  -4   9  -1   95.89    4.30
  -4   9  -1  104.09    6.60
  -4   9  -1   95.09    6.20
  -4   9  -1   96.39    4.60
  -4   9  -1   96.99    3.30
  -4   9  -1   94.49    3.30
  -4   9  -1   98.39    4.50
   4  -9   1   88.49    2.70
   4  -9   1   97.79    4.70
   4  -9   1   94.39    4.30
   4  -9   1   92.19    2.70
   4  -9   1   87.69    3.90
   4  -9   1   91.29    4.40
  -5   9  -1  105.29    4.70
  -5   9  -1  115.69    7.10
  -5   9  -1   99.59    3.50
  -5   9  -1  103.49    3.40
  -5   9  -1  103.99    6.80
  -5   9  -1   95.39    5.10
  -5   9  -1  104.39    4.80
   5  -9   1   99.39    4.80
   5  -9   1  105.19    4.60
   5  -9   1   89.19    2.40
   5  -9   1   88.19    2.40
  -6   9  -1   19.50    2.60
  -6   9  -1   16.40    2.90
  -6   9  -1   17.90    2.90
  -6   9  -1   11.70    3.80
  -6   9  -1   15.80    2.20
  -6   9  -1   16.70    1.80
  -6   9  -1   17.60    3.90
   6  -9   1   14.00    2.80
   6  -9   1   14.90    2.60
  -7   9  -1   44.40    4.10
  -7   9  -1   49.60    2.40
  -7   9  -1   45.40    4.20
  -7   9  -1   53.89    3.50
  -7   9  -1   47.70    5.50
  -7   9  -1   45.90    2.40
   7  -9   1   49.80    3.40
   7  -9   1   49.20    3.90
  -8   9  -1   36.50    2.00
  -8   9  -1   28.70    3.70
  -8   9  -1   35.00    2.00
  -8   9  -1   29.30    2.60
  -8   9  -1   30.90    4.70
  -8   9  -1   31.80    4.80
  -8   9  -1   35.40    4.10
   8  -9   1   32.30    2.90
   8  -9   1   33.40    4.20
  -9   9  -1   24.00    4.40
  -9   9  -1   19.30    4.40
  -9   9  -1   16.60    3.60
  -9   9  -1   21.90    2.60
  -9   9  -1   23.80    2.10
  -9   9  -1   21.40    3.60
  -9   9  -1   25.20    1.90
  -9   9  -1   20.90    2.60
   9  -9   1   23.00    2.50
   9  -9   1   27.70    4.00
 -10   9  -1    4.30    3.60
 -10   9  -1    1.70    3.50
 -10   9  -1    3.10    3.10
 -10   9  -1    3.30    1.90
 -10   9  -1    5.90    1.30
 -10   9  -1    4.50    1.30
 -10   9  -1    8.00    3.20
 -10   9  -1    0.00    1.70
  10  -9   1    6.20    2.00
  10  -9   1    9.20    3.60
 -11   9  -1   59.19    5.50
 -11   9  -1   54.19    3.40
 -11   9  -1   56.89    5.40
 -11   9  -1   47.10    2.70
 -11   9  -1   50.99    6.50
 -11   9  -1   54.49    3.30
 -11   9  -1   54.99    3.10
 -11   9  -1   54.59   10.60
  11  -9   1   59.59    5.50
  11  -9   1   51.89    3.40
 -12   9  -1   20.40    2.50
 -12   9  -1   21.90    5.00
 -12   9  -1   20.80    5.10
 -12   9  -1   16.80    4.20
 -12   9  -1   23.20    2.80
 -12   9  -1   18.80    2.10
  12  -9   1   21.50    4.30
  12  -9   1   24.90    2.60
 -13   9  -1   12.30    4.00
 -13   9  -1   18.60    2.30
 -13   9  -1   17.20    2.10
 -13   9  -1   21.90    2.40
 -13   9  -1   17.70    2.30
 -13   9  -1   26.30    4.90
 -13   9  -1   20.50    5.50
 -14   9  -1   20.20    4.60
 -14   9  -1   25.20    2.60
 -14   9  -1   35.70    5.90
 -14   9  -1   23.20    2.40
 -14   9  -1   19.20    2.40
 -14   9  -1   24.50    5.00
 -14   9  -1   28.80    5.50
 -14   9  -1   23.10    2.60
  14  -9   1   23.70    5.00
 -15   9  -1    4.70    1.80
 -15   9  -1   -1.90    3.80
 -15   9  -1    0.30    3.30
 -15   9  -1    1.10    1.60
 -15   9  -1    4.60    1.70
  15  -9   1    0.40    3.60
  14   8  -1    4.60    3.80
  14   8  -1    4.20    2.20
  14   8  -1   10.70    3.20
  14   8  -1   10.60    3.70
  14   8  -1    5.40    2.80
 -14  -8   1    7.60    3.70
 -14  -8   1    7.90    4.50
 -14  -8   1    5.80    7.20
 -14  -8   1    4.40    7.00
 -14  -8   1    8.00    3.00
 -14  -8   1   10.50    3.00
 -14  -8   1    7.20    3.40
 -14  -8   1    5.40    3.10
 -14  -8   1    9.00    2.50
 -14  -8   1    5.90    3.10
  13   8  -1   24.30    3.90
  13   8  -1   25.10    5.20
  13   8  -1   25.00    3.80
  13   8  -1   31.00    4.60
  13   8  -1   16.40    5.30
  13   8  -1   27.50    3.90
 -13  -8   1   30.10    4.10
 -13  -8   1   30.20    4.30
 -13  -8   1   21.10    4.30
 -13  -8   1   23.00    4.10
 -13  -8   1   35.70    6.70
 -13  -8   1   23.40    4.80
 -13  -8   1   32.00    4.10
 -13  -8   1   26.90    4.00
 -13  -8   1   29.80    4.00
 -13  -8   1   39.80    8.30
  12   8  -1   17.70    3.40
  12   8  -1   25.10    3.20
  12   8  -1   26.20    3.60
[truncated: 7,406,258 more chars]
