# Supplementary material
Source: MDPI journal article supplement (https://www.mdpi.com/2304-6740/12/5/131)
Supplement: s1 [file s1 › GM31_23_0m_a.cif]

 
data_GM31_23_0m_a
 
_audit_creation_method            'SHELXL-2018/3'
_shelx_SHELXL_version_number      '2018/3'
_chemical_name_systematic         ?
_chemical_name_common             ?
_chemical_melting_point           ?
_chemical_formula_moiety          ?
_chemical_formula_sum
 'C66 H52 Ag B F4 N2 O P2 S2' 
_chemical_formula_weight          1209.83

loop_
 _atom_type_symbol
 _atom_type_description
 _atom_type_scat_dispersion_real
 _atom_type_scat_dispersion_imag
 _atom_type_scat_source
 'C'  'C'   0.0033   0.0016
 'International Tables Vol C Tables 4.2.6.8 and 6.1.1.4'
 'H'  'H'   0.0000   0.0000
 'International Tables Vol C Tables 4.2.6.8 and 6.1.1.4'
 'Ag'  'Ag'  -0.8971   1.1015
 'International Tables Vol C Tables 4.2.6.8 and 6.1.1.4'
 'B'  'B'   0.0013   0.0007
 'International Tables Vol C Tables 4.2.6.8 and 6.1.1.4'
 'F'  'F'   0.0171   0.0103
 'International Tables Vol C Tables 4.2.6.8 and 6.1.1.4'
 'N'  'N'   0.0061   0.0033
 'International Tables Vol C Tables 4.2.6.8 and 6.1.1.4'
 'P'  'P'   0.1023   0.0942
 'International Tables Vol C Tables 4.2.6.8 and 6.1.1.4'
 'S'  'S'   0.1246   0.1234
 'International Tables Vol C Tables 4.2.6.8 and 6.1.1.4'
 'O'  'O'   0.0106   0.0060
 'International Tables Vol C Tables 4.2.6.8 and 6.1.1.4'
 
_space_group_crystal_system       monoclinic
_space_group_IT_number            14
_space_group_name_H-M_alt         'P 21/c'
_space_group_name_Hall            '-P 2ybc'
 
_shelx_space_group_comment
;
The symmetry employed for this shelxl refinement is uniquely defined
by the following loop, which should always be used as a source of
symmetry information in preference to the above space-group names.
They are only intended as comments.
;
 
loop_
 _space_group_symop_operation_xyz
 'x, y, z'
 '-x, y+1/2, -z+1/2'
 '-x, -y, -z'
 'x, -y-1/2, z-1/2'
 
_cell_length_a                    14.2376(12)
_cell_length_b                    20.6038(17)
_cell_length_c                    20.3351(16)
_cell_angle_alpha                 90
_cell_angle_beta                  104.476(3)
_cell_angle_gamma                 90
_cell_volume                      5775.9(8)
_cell_formula_units_Z             4
_cell_measurement_temperature     296(2)
_cell_measurement_reflns_used     9826
_cell_measurement_theta_min       2.82
_cell_measurement_theta_max       27.56
 
_exptl_crystal_description        needle
_exptl_crystal_colour             yellow
_exptl_crystal_density_meas       ?
_exptl_crystal_density_method     ?
_exptl_crystal_density_diffrn     1.391          
_exptl_crystal_F_000              2480
_exptl_transmission_factor_min    ?
_exptl_transmission_factor_max    ?
_exptl_crystal_size_max           0.300
_exptl_crystal_size_mid           0.080
_exptl_crystal_size_min           0.060
_exptl_absorpt_coefficient_mu     0.535
_shelx_estimated_absorpt_T_min    0.856
_shelx_estimated_absorpt_T_max    0.969
_exptl_absorpt_correction_type          Multi-Scan
_exptl_absorpt_correction_T_min   0.617
_exptl_absorpt_correction_T_max   0.746
_exptl_absorpt_process_details          
;
SADABS-2016/2 - Bruker AXS area detector scaling and absorption correction
;
_exptl_absorpt_special_details    ?
_diffrn_ambient_temperature       296(2)
_diffrn_radiation_wavelength      0.71073
_diffrn_radiation_type            MoK\a
_diffrn_source                    'sealed tube'
_diffrn_measurement_device_type   'Bruker D8 Eco with PHOTON II detector'
_diffrn_measurement_method        '/f and /w shutterless scans'
_diffrn_detector_area_resol_mean  7.3910
_diffrn_reflns_number             185416
_diffrn_reflns_av_unetI/netI      0.0400
_diffrn_reflns_av_R_equivalents   0.1269
_diffrn_reflns_limit_h_min        -16
_diffrn_reflns_limit_h_max        16
_diffrn_reflns_limit_k_min        -24
_diffrn_reflns_limit_k_max        24
_diffrn_reflns_limit_l_min        -24
_diffrn_reflns_limit_l_max        21
_diffrn_reflns_theta_min          2.431
_diffrn_reflns_theta_max          24.998
_diffrn_reflns_theta_full         24.998
_diffrn_measured_fraction_theta_max   0.998
_diffrn_measured_fraction_theta_full  0.998
_diffrn_reflns_Laue_measured_fraction_max    0.998
_diffrn_reflns_Laue_measured_fraction_full   0.998
_diffrn_reflns_point_group_measured_fraction_max   0.998
_diffrn_reflns_point_group_measured_fraction_full  0.998
_reflns_number_total              10152
_reflns_number_gt                 7846
_reflns_threshold_expression      'I > 2\s(I)'
_reflns_Friedel_coverage          0.000
_reflns_Friedel_fraction_max      .
_reflns_Friedel_fraction_full     .
 
_reflns_special_details
;
 Reflections were merged by SHELXL according to the crystal
 class for the calculation of statistics and refinement.
 
 _reflns_Friedel_fraction is defined as the number of unique
 Friedel pairs measured divided by the number that would be
 possible theoretically, ignoring centric projections and
 systematic absences.
;
 
_computing_data_collection        ?
_computing_cell_refinement        ?
_computing_data_reduction         ?
_computing_structure_solution     'SHELXT 2014/5 (Sheldrick, 2014)'
_computing_structure_refinement 'SHELXL-2018/3 (Sheldrick, 2018)'
_computing_molecular_graphics     ?
_computing_publication_material   ?
_refine_special_details           ?
_refine_ls_structure_factor_coef  Fsqd
_refine_ls_matrix_type            full
_refine_ls_weighting_scheme       calc
_refine_ls_weighting_details
'w=1/[\s^2^(Fo^2^)+(0.0219P)^2^+10.2816P] where P=(Fo^2^+2Fc^2^)/3'
_atom_sites_solution_primary      ?
_atom_sites_solution_secondary    ?
_atom_sites_solution_hydrogens    geom
_refine_ls_hydrogen_treatment     constr
_refine_ls_extinction_method      none
_refine_ls_extinction_coef        .
_refine_ls_number_reflns          10152
_refine_ls_number_parameters      714
_refine_ls_number_restraints      0
_refine_ls_R_factor_all           0.0889
_refine_ls_R_factor_gt            0.0649
_refine_ls_wR_factor_ref          0.1143
_refine_ls_wR_factor_gt           0.1077
_refine_ls_goodness_of_fit_ref    1.171
_refine_ls_restrained_S_all       1.171
_refine_ls_shift/su_max           0.001
_refine_ls_shift/su_mean          0.000
 
loop_
 _atom_site_label
 _atom_site_type_symbol
 _atom_site_fract_x
 _atom_site_fract_y
 _atom_site_fract_z
 _atom_site_U_iso_or_equiv
 _atom_site_adp_type
 _atom_site_occupancy
 _atom_site_site_symmetry_order  
 _atom_site_calc_flag
 _atom_site_refinement_flags_posn
 _atom_site_refinement_flags_adp
 _atom_site_refinement_flags_occupancy
 _atom_site_disorder_assembly
 _atom_site_disorder_group
Ag1 Ag 0.24022(2) 0.27682(2) 0.64684(2) 0.04240(10) Uani 1 1 d . . . . .
N1 N 0.3212(2) 0.20878(15) 0.58359(16) 0.0374(8) Uani 1 1 d . . . . .
N2 N 0.1508(2) 0.17823(16) 0.61763(16) 0.0375(8) Uani 1 1 d . . . . .
S1 S -0.1842(2) 0.39924(11) 0.87348(13) 0.1419(10) Uani 1 1 d . . . . .
S2 S 0.75184(14) 0.53824(10) 0.73145(12) 0.1138(7) Uani 1 1 d . . . . .
C1 C 0.4062(3) 0.2222(2) 0.5700(2) 0.0426(10) Uani 1 1 d . . . . .
C2 C 0.4521(3) 0.1771(2) 0.5362(2) 0.0517(12) Uani 1 1 d . . . . .
H2 H 0.511418 0.187248 0.527462 0.062 Uiso 1 1 calc R U . . .
C3 C 0.4100(3) 0.1192(2) 0.5165(2) 0.0537(12) Uani 1 1 d . . . . .
H3 H 0.440372 0.089417 0.494323 0.064 Uiso 1 1 calc R U . . .
C4 C 0.3209(3) 0.1041(2) 0.5295(2) 0.0448(10) Uani 1 1 d . . . . .
C5 C 0.2720(4) 0.0443(2) 0.5081(2) 0.0564(13) Uani 1 1 d . . . . .
H5 H 0.300159 0.013814 0.485190 0.068 Uiso 1 1 calc R U . . .
C6 C 0.1858(4) 0.0318(2) 0.5207(2) 0.0563(13) Uani 1 1 d . . . . .
H6 H 0.153928 -0.006720 0.504931 0.068 Uiso 1 1 calc R U . . .
C7 C 0.1424(3) 0.0759(2) 0.5574(2) 0.0483(11) Uani 1 1 d . . . . .
C8 C 0.1878(3) 0.13555(19) 0.5801(2) 0.0392(10) Uani 1 1 d . . . . .
C9 C 0.2789(3) 0.15060(19) 0.56436(19) 0.0365(9) Uani 1 1 d . . . . .
C10 C 0.0542(3) 0.0631(2) 0.5739(2) 0.0573(13) Uani 1 1 d . . . . .
H10 H 0.021722 0.024346 0.560293 0.069 Uiso 1 1 calc R U . . .
C11 C 0.0162(3) 0.1067(2) 0.6093(2) 0.0557(12) Uani 1 1 d . . . . .
H11 H -0.043507 0.098731 0.618515 0.067 Uiso 1 1 calc R U . . .
C12 C 0.0670(3) 0.1646(2) 0.6326(2) 0.0438(10) Uani 1 1 d . . . . .
C13 C 0.0319(3) 0.2115(2) 0.6743(2) 0.0492(11) Uani 1 1 d . . . . .
H13 H 0.074154 0.245018 0.692593 0.059 Uiso 1 1 calc R U . . .
C14 C -0.0534(3) 0.2117(2) 0.6889(2) 0.0525(12) Uani 1 1 d . . . . .
H14 H -0.095898 0.178330 0.670674 0.063 Uiso 1 1 calc R U . . .
C15 C -0.0875(3) 0.2590(2) 0.7308(2) 0.0510(12) Uani 1 1 d . . . . .
C16 C -0.1719(4) 0.2470(3) 0.7504(3) 0.0648(14) Uani 1 1 d . . . . .
H16 H -0.208018 0.210117 0.734444 0.078 Uiso 1 1 calc R U . . .
C17 C -0.2035(4) 0.2887(3) 0.7932(3) 0.0782(17) Uani 1 1 d . . . . .
H17 H -0.260650 0.279772 0.805705 0.094 Uiso 1 1 calc R U . . .
C18 C -0.1511(4) 0.3436(3) 0.8177(3) 0.0747(16) Uani 1 1 d . . . . .
C19 C -0.0690(4) 0.3574(3) 0.7963(3) 0.0760(16) Uani 1 1 d . . . . .
H19 H -0.034369 0.395166 0.811000 0.091 Uiso 1 1 calc R U . . .
C20 C -0.0380(4) 0.3161(3) 0.7537(3) 0.0643(14) Uani 1 1 d . . . . .
H20 H 0.017499 0.326447 0.739590 0.077 Uiso 1 1 calc R U . . .
C21 C -0.2621(8) 0.3591(4) 0.9069(5) 0.184(5) Uani 1 1 d . . . . .
H21A H -0.309107 0.337673 0.871470 0.276 Uiso 1 1 calc R U . . .
H21B H -0.294455 0.388982 0.930087 0.276 Uiso 1 1 calc R U . . .
H21C H -0.227775 0.327428 0.938576 0.276 Uiso 1 1 calc R U . . .
C22 C 0.4499(3) 0.2843(2) 0.5943(2) 0.0466(10) Uani 1 1 d . . . . .
H22 H 0.409947 0.314989 0.607013 0.056 Uiso 1 1 calc R U . . .
C23 C 0.5412(3) 0.3012(2) 0.5999(2) 0.0533(12) Uani 1 1 d . . . . .
H23 H 0.579587 0.272054 0.583450 0.064 Uiso 1 1 calc R U . . .
C24 C 0.5871(3) 0.3609(2) 0.6293(3) 0.0559(12) Uani 1 1 d . . . . .
C25 C 0.5380(4) 0.4105(3) 0.6523(3) 0.0764(17) Uani 1 1 d . . . . .
H25 H 0.471317 0.407112 0.646391 0.092 Uiso 1 1 calc R U . . .
C26 C 0.5854(4) 0.4648(3) 0.6836(3) 0.0862(19) Uani 1 1 d . . . . .
H26 H 0.550737 0.497743 0.698184 0.103 Uiso 1 1 calc R U . . .
C27 C 0.6847(4) 0.4701(3) 0.6933(3) 0.0731(16) Uani 1 1 d . . . . .
C28 C 0.7340(4) 0.4225(3) 0.6687(4) 0.088(2) Uani 1 1 d . . . . .
H28 H 0.800286 0.426626 0.673032 0.106 Uiso 1 1 calc R U . . .
C29 C 0.6860(4) 0.3691(3) 0.6381(3) 0.0753(17) Uani 1 1 d . . . . .
H29 H 0.720862 0.336919 0.622464 0.090 Uiso 1 1 calc R U . . .
C30 C 0.6717(5) 0.5775(4) 0.7663(3) 0.109(3) Uani 1 1 d . . . . .
H30A H 0.614958 0.588378 0.731358 0.164 Uiso 1 1 calc R U . . .
H30B H 0.700944 0.616404 0.788107 0.164 Uiso 1 1 calc R U . . .
H30C H 0.653811 0.549840 0.799188 0.164 Uiso 1 1 calc R U . . .
P1 P 0.14430(9) 0.37182(5) 0.58626(6) 0.0444(3) Uani 1 1 d . . . . .
P2 P 0.33176(8) 0.29487(6) 0.76880(6) 0.0434(3) Uani 1 1 d . . . . .
O1 O 0.2632(3) 0.42050(17) 0.70740(17) 0.0771(12) Uani 1 1 d . . . . .
C31 C 0.0326(3) 0.3576(2) 0.5215(2) 0.0507(11) Uani 1 1 d . . . . .
C32 C 0.0092(4) 0.3875(3) 0.4591(3) 0.0620(13) Uani 1 1 d . . . . .
H32 H 0.051632 0.417854 0.448660 0.074 Uiso 1 1 calc R U . . .
C33 C -0.0761(4) 0.3734(3) 0.4117(3) 0.0810(18) Uani 1 1 d . . . . .
H33 H -0.090022 0.393045 0.369189 0.097 Uiso 1 1 calc R U . . .
C34 C -0.1398(5) 0.3304(3) 0.4276(4) 0.091(2) Uani 1 1 d . . . . .
H34 H -0.197517 0.321159 0.395820 0.109 Uiso 1 1 calc R U . . .
C35 C -0.1200(5) 0.3012(3) 0.4889(4) 0.102(2) Uani 1 1 d . . . . .
H35 H -0.164353 0.272473 0.499617 0.122 Uiso 1 1 calc R U . . .
C36 C -0.0334(4) 0.3142(3) 0.5358(3) 0.0854(19) Uani 1 1 d . . . . .
H36 H -0.019346 0.293328 0.577670 0.102 Uiso 1 1 calc R U . . .
C37 C 0.2185(3) 0.4203(2) 0.5436(2) 0.0478(11) Uani 1 1 d . . . . .
C38 C 0.2232(5) 0.4871(3) 0.5474(3) 0.0784(17) Uani 1 1 d . . . . .
H38 H 0.186680 0.509529 0.572044 0.094 Uiso 1 1 calc R U . . .
C39 C 0.2817(6) 0.5206(3) 0.5149(3) 0.096(2) Uani 1 1 d . . . . .
H39 H 0.284151 0.565622 0.517365 0.116 Uiso 1 1 calc R U . . .
C40 C 0.3366(5) 0.4883(4) 0.4789(3) 0.093(2) Uani 1 1 d . . . . .
H40 H 0.378605 0.511012 0.458859 0.112 Uiso 1 1 calc R U . . .
C41 C 0.3291(5) 0.4223(4) 0.4726(3) 0.090(2) Uani 1 1 d . . . . .
H41 H 0.363221 0.400357 0.445990 0.108 Uiso 1 1 calc R U . . .
C42 C 0.2712(4) 0.3884(3) 0.5054(3) 0.0663(14) Uani 1 1 d . . . . .
H42 H 0.267577 0.343384 0.501662 0.080 Uiso 1 1 calc R U . . .
C43 C 0.1049(3) 0.4294(2) 0.6426(2) 0.0477(11) Uani 1 1 d . . . . .
C44 C 0.0121(4) 0.4540(2) 0.6308(3) 0.0629(14) Uani 1 1 d . . . . .
H44 H -0.033811 0.442948 0.591217 0.076 Uiso 1 1 calc R U . . .
C45 C -0.0131(5) 0.4950(3) 0.6776(4) 0.0828(18) Uani 1 1 d . . . . .
H45 H -0.075239 0.512466 0.668902 0.099 Uiso 1 1 calc R U . . .
C46 C 0.0537(5) 0.5094(3) 0.7365(3) 0.087(2) Uani 1 1 d . . . . .
H46 H 0.035706 0.535862 0.768363 0.104 Uiso 1 1 calc R U . . .
C47 C 0.1469(5) 0.4860(3) 0.7499(3) 0.0747(16) Uani 1 1 d . . . . .
H47 H 0.192071 0.496598 0.790050 0.090 Uiso 1 1 calc R U . . .
C48 C 0.1717(4) 0.4463(2) 0.7022(2) 0.0572(13) Uani 1 1 d . . . . .
C49 C 0.3404(4) 0.4301(2) 0.7626(2) 0.0573(13) Uani 1 1 d . . . . .
C50 C 0.3758(5) 0.4916(3) 0.7811(3) 0.0781(17) Uani 1 1 d . . . . .
H50 H 0.345618 0.527723 0.757570 0.094 Uiso 1 1 calc R U . . .
C51 C 0.4552(5) 0.4988(3) 0.8338(3) 0.0812(18) Uani 1 1 d . . . . .
H51 H 0.477948 0.540147 0.847686 0.097 Uiso 1 1 calc R U . . .
C52 C 0.5014(4) 0.4460(3) 0.8664(3) 0.0789(17) Uani 1 1 d . . . . .
H52 H 0.556846 0.451298 0.901529 0.095 Uiso 1 1 calc R U . . .
C53 C 0.4665(4) 0.3841(3) 0.8476(3) 0.0678(15) Uani 1 1 d . . . . .
H53 H 0.498437 0.348200 0.870629 0.081 Uiso 1 1 calc R U . . .
C54 C 0.3842(3) 0.3753(2) 0.7946(2) 0.0468(11) Uani 1 1 d . . . . .
C55 C 0.4321(3) 0.2397(2) 0.8042(2) 0.0503(11) Uani 1 1 d . . . . .
C56 C 0.4905(4) 0.2203(3) 0.7628(3) 0.0649(13) Uani 1 1 d . . . . .
H56 H 0.478740 0.236441 0.718819 0.078 Uiso 1 1 calc R U . . .
C57 C 0.5662(4) 0.1773(3) 0.7857(3) 0.0814(17) Uani 1 1 d . . . . .
H57 H 0.605408 0.165136 0.757410 0.098 Uiso 1 1 calc R U . . .
C58 C 0.5831(4) 0.1529(3) 0.8495(4) 0.092(2) Uani 1 1 d . . . . .
H58 H 0.632897 0.123004 0.864424 0.111 Uiso 1 1 calc R U . . .
C59 C 0.5276(4) 0.1718(3) 0.8919(3) 0.095(2) Uani 1 1 d . . . . .
H59 H 0.540663 0.155502 0.935941 0.114 Uiso 1 1 calc R U . . .
C60 C 0.4514(4) 0.2154(3) 0.8698(3) 0.0731(16) Uani 1 1 d . . . . .
H60 H 0.413684 0.228084 0.898822 0.088 Uiso 1 1 calc R U . . .
C61 C 0.2495(3) 0.2827(2) 0.8237(2) 0.0479(11) Uani 1 1 d . . . . .
C62 C 0.2070(4) 0.2217(3) 0.8226(3) 0.0621(13) Uani 1 1 d . . . . .
H62 H 0.222737 0.189102 0.795662 0.074 Uiso 1 1 calc R U . . .
C63 C 0.1420(4) 0.2092(3) 0.8611(3) 0.0741(16) Uani 1 1 d . . . . .
H63 H 0.115195 0.167979 0.860850 0.089 Uiso 1 1 calc R U . . .
C64 C 0.1168(4) 0.2576(3) 0.8997(3) 0.0728(16) Uani 1 1 d . . . . .
H64 H 0.072374 0.249575 0.925393 0.087 Uiso 1 1 calc R U . . .
C65 C 0.1576(4) 0.3180(3) 0.9003(2) 0.0677(15) Uani 1 1 d . . . . .
H65 H 0.140414 0.350830 0.926421 0.081 Uiso 1 1 calc R U . . .
C66 C 0.2236(3) 0.3307(3) 0.8629(2) 0.0553(12) Uani 1 1 d . . . . .
H66 H 0.250897 0.371782 0.863984 0.066 Uiso 1 1 calc R U . . .
B1 B 0.7047(5) 0.1219(3) 0.5943(4) 0.0675(17) Uani 1 1 d . . . . .
F2 F 0.7866(3) 0.0866(2) 0.6104(2) 0.1275(16) Uani 1 1 d . . . . .
F1 F 0.6374(2) 0.08963(18) 0.5453(2) 0.1033(13) Uani 1 1 d . . . . .
F3 F 0.6707(4) 0.1314(2) 0.6500(2) 0.1355(17) Uani 1 1 d . . . . .
F4 F 0.7200(3) 0.1820(2) 0.5719(2) 0.1262(15) Uani 1 1 d . . . . .
 
loop_
 _atom_site_aniso_label
 _atom_site_aniso_U_11
 _atom_site_aniso_U_22
 _atom_site_aniso_U_33
 _atom_site_aniso_U_23
 _atom_site_aniso_U_13
 _atom_site_aniso_U_12
Ag1 0.04290(18) 0.03906(17) 0.04752(19) -0.00764(16) 0.01559(14) -0.00082(16)
N1 0.0356(18) 0.037(2) 0.0395(19) -0.0018(15) 0.0088(15) 0.0024(15)
N2 0.0338(19) 0.042(2) 0.0384(19) -0.0005(15) 0.0114(15) -0.0003(15)
S1 0.213(3) 0.1123(17) 0.1409(19) -0.0514(14) 0.120(2) -0.0283(17)
S2 0.0897(13) 0.0949(14) 0.1535(19) -0.0260(13) 0.0241(13) -0.0427(11)
C1 0.039(2) 0.048(2) 0.043(2) -0.002(2) 0.0143(19) 0.001(2)
C2 0.043(3) 0.061(3) 0.057(3) -0.004(2) 0.024(2) 0.005(2)
C3 0.050(3) 0.056(3) 0.058(3) -0.012(2) 0.019(2) 0.013(2)
C4 0.048(3) 0.043(3) 0.041(2) -0.002(2) 0.008(2) 0.007(2)
C5 0.069(3) 0.041(3) 0.061(3) -0.010(2) 0.018(3) 0.009(2)
C6 0.068(3) 0.039(3) 0.060(3) -0.012(2) 0.013(3) -0.009(2)
C7 0.055(3) 0.042(3) 0.046(3) -0.003(2) 0.009(2) -0.007(2)
C8 0.039(2) 0.037(2) 0.040(2) 0.0010(18) 0.0072(19) 0.0013(18)
C9 0.038(2) 0.038(2) 0.033(2) -0.0023(17) 0.0073(18) 0.0047(18)
C10 0.053(3) 0.051(3) 0.066(3) -0.010(2) 0.011(2) -0.017(2)
C11 0.042(3) 0.063(3) 0.064(3) -0.002(3) 0.016(2) -0.015(2)
C12 0.037(2) 0.052(3) 0.042(2) 0.000(2) 0.0109(19) -0.003(2)
C13 0.040(2) 0.060(3) 0.049(3) -0.004(2) 0.013(2) -0.006(2)
C14 0.042(3) 0.063(3) 0.054(3) -0.004(2) 0.014(2) -0.008(2)
C15 0.043(3) 0.063(3) 0.049(3) -0.002(2) 0.015(2) -0.003(2)
C16 0.056(3) 0.071(3) 0.076(4) -0.007(3) 0.032(3) -0.009(3)
C17 0.078(4) 0.082(4) 0.093(4) -0.006(3) 0.057(3) -0.008(3)
C18 0.089(4) 0.077(4) 0.068(4) -0.012(3) 0.038(3) -0.004(3)
C19 0.076(4) 0.076(4) 0.080(4) -0.018(3) 0.029(3) -0.015(3)
C20 0.052(3) 0.072(4) 0.074(4) -0.011(3) 0.026(3) -0.011(3)
C21 0.249(12) 0.135(8) 0.231(11) -0.042(8) 0.179(10) 0.008(8)
C22 0.046(3) 0.045(3) 0.053(3) -0.002(2) 0.021(2) -0.002(2)
C23 0.045(3) 0.055(3) 0.066(3) 0.001(2) 0.024(2) -0.002(2)
C24 0.048(3) 0.057(3) 0.066(3) 0.003(2) 0.021(2) -0.009(2)
C25 0.054(3) 0.081(4) 0.104(5) -0.023(3) 0.038(3) -0.024(3)
C26 0.080(4) 0.078(4) 0.111(5) -0.034(4) 0.044(4) -0.031(3)
C27 0.060(3) 0.073(4) 0.081(4) 0.001(3) 0.008(3) -0.029(3)
C28 0.048(3) 0.072(4) 0.135(6) 0.011(4) 0.005(4) -0.009(3)
C29 0.046(3) 0.058(3) 0.120(5) 0.009(3) 0.016(3) -0.003(3)
C30 0.112(6) 0.118(6) 0.095(5) -0.027(4) 0.021(4) -0.060(5)
P1 0.0492(7) 0.0391(6) 0.0428(6) -0.0053(5) 0.0075(5) 0.0053(5)
P2 0.0438(6) 0.0468(7) 0.0392(6) -0.0009(5) 0.0096(5) -0.0032(5)
O1 0.086(3) 0.064(2) 0.063(2) -0.0280(18) -0.016(2) 0.026(2)
C31 0.052(3) 0.043(3) 0.052(3) -0.005(2) 0.003(2) 0.008(2)
C32 0.055(3) 0.068(3) 0.058(3) -0.002(3) 0.006(3) 0.014(3)
C33 0.070(4) 0.094(5) 0.067(4) -0.004(3) -0.007(3) 0.024(4)
C34 0.064(4) 0.093(5) 0.093(5) -0.018(4) -0.019(4) 0.013(4)
C35 0.070(4) 0.098(5) 0.120(6) -0.001(5) -0.008(4) -0.028(4)
C36 0.082(4) 0.079(4) 0.081(4) 0.011(3) -0.007(3) -0.020(3)
C37 0.053(3) 0.048(3) 0.040(2) -0.001(2) 0.007(2) 0.002(2)
C38 0.114(5) 0.054(3) 0.079(4) -0.006(3) 0.048(4) -0.006(3)
C39 0.145(7) 0.069(4) 0.087(5) -0.004(4) 0.052(5) -0.023(4)
C40 0.097(5) 0.107(6) 0.082(5) 0.012(4) 0.035(4) -0.024(4)
C41 0.091(5) 0.109(6) 0.084(4) 0.009(4) 0.048(4) 0.017(4)
C42 0.073(4) 0.061(3) 0.069(3) -0.002(3) 0.025(3) 0.011(3)
C43 0.059(3) 0.039(2) 0.048(3) -0.001(2) 0.018(2) 0.003(2)
C44 0.061(3) 0.057(3) 0.077(4) -0.009(3) 0.029(3) 0.003(3)
C45 0.074(4) 0.074(4) 0.116(5) -0.020(4) 0.054(4) 0.000(3)
C46 0.112(6) 0.076(4) 0.094(5) -0.024(4) 0.066(4) -0.005(4)
C47 0.112(5) 0.057(3) 0.056(3) -0.017(3) 0.022(3) -0.002(3)
C48 0.077(4) 0.040(3) 0.053(3) -0.003(2) 0.014(3) 0.007(2)
C49 0.068(3) 0.056(3) 0.045(3) -0.010(2) 0.009(2) -0.006(3)
C50 0.109(5) 0.054(3) 0.065(4) -0.011(3) 0.010(3) -0.006(3)
C51 0.096(5) 0.065(4) 0.086(4) -0.024(3) 0.027(4) -0.028(4)
C52 0.060(4) 0.088(5) 0.081(4) -0.024(4) 0.004(3) -0.026(3)
C53 0.058(3) 0.076(4) 0.062(3) -0.003(3) 0.000(3) -0.014(3)
C54 0.047(3) 0.054(3) 0.041(2) -0.004(2) 0.015(2) -0.011(2)
C55 0.046(3) 0.052(3) 0.051(3) 0.005(2) 0.009(2) -0.003(2)
C56 0.057(3) 0.074(4) 0.065(3) 0.009(3) 0.018(3) 0.007(3)
C57 0.057(4) 0.091(5) 0.102(5) 0.008(4) 0.032(3) 0.010(3)
C58 0.050(3) 0.111(5) 0.111(5) 0.037(4) 0.012(4) 0.019(3)
C59 0.069(4) 0.128(6) 0.081(4) 0.049(4) 0.008(3) 0.021(4)
C60 0.061(3) 0.096(4) 0.060(3) 0.017(3) 0.012(3) 0.011(3)
C61 0.044(2) 0.057(3) 0.042(2) 0.001(2) 0.0081(19) -0.006(2)
C62 0.066(3) 0.060(3) 0.063(3) 0.004(3) 0.022(3) -0.005(3)
C63 0.073(4) 0.073(4) 0.080(4) 0.018(3) 0.027(3) -0.015(3)
C64 0.064(4) 0.100(5) 0.063(4) 0.015(3) 0.031(3) -0.008(3)
C65 0.062(3) 0.097(5) 0.047(3) -0.014(3) 0.018(3) -0.008(3)
C66 0.054(3) 0.069(3) 0.044(3) -0.011(2) 0.014(2) -0.014(2)
B1 0.050(4) 0.063(4) 0.090(5) -0.010(4) 0.019(3) -0.001(3)
F2 0.060(2) 0.109(3) 0.196(5) -0.005(3) 0.000(3) 0.006(2)
F1 0.058(2) 0.109(3) 0.134(3) -0.059(2) 0.008(2) 0.0065(19)
F3 0.174(4) 0.140(4) 0.114(3) -0.044(3) 0.074(3) -0.046(3)
F4 0.160(4) 0.085(3) 0.136(4) 0.016(2) 0.041(3) -0.015(3)
 
_geom_special_details
;
 All esds (except the esd in the dihedral angle between two l.s. planes)
 are estimated using the full covariance matrix.  The cell esds are taken
 into account individually in the estimation of esds in distances, angles
 and torsion angles; correlations between esds in cell parameters are only
 used when they are defined by crystal symmetry.  An approximate (isotropic)
 treatment of cell esds is used for estimating esds involving l.s. planes.
;
 
loop_
 _geom_bond_atom_site_label_1
 _geom_bond_atom_site_label_2
 _geom_bond_distance
 _geom_bond_site_symmetry_2
 _geom_bond_publ_flag
Ag1 N1 2.385(3) . ?
Ag1 N2 2.392(3) . ?
Ag1 P2 2.5242(12) . ?
Ag1 P1 2.5245(12) . ?
N1 C1 1.336(5) . ?
N1 C9 1.354(5) . ?
N2 C12 1.334(5) . ?
N2 C8 1.354(5) . ?
S1 C21 1.659(9) . ?
S1 C18 1.758(6) . ?
S2 C30 1.691(7) . ?
S2 C27 1.765(5) . ?
C1 C2 1.410(6) . ?
C1 C22 1.453(6) . ?
C2 C3 1.350(6) . ?
C2 H2 0.9300 . ?
C3 C4 1.394(6) . ?
C3 H3 0.9300 . ?
C4 C9 1.410(5) . ?
C4 C5 1.429(6) . ?
C5 C6 1.339(6) . ?
C5 H5 0.9300 . ?
C6 C7 1.414(6) . ?
C6 H6 0.9300 . ?
C7 C10 1.404(6) . ?
C7 C8 1.411(6) . ?
C8 C9 1.446(5) . ?
C10 C11 1.346(6) . ?
C10 H10 0.9300 . ?
C11 C12 1.414(6) . ?
C11 H11 0.9300 . ?
C12 C13 1.453(6) . ?
C13 C14 1.322(6) . ?
C13 H13 0.9300 . ?
C14 C15 1.455(6) . ?
C14 H14 0.9300 . ?
C15 C16 1.379(6) . ?
C15 C20 1.391(7) . ?
C16 C17 1.376(7) . ?
C16 H16 0.9300 . ?
C17 C18 1.378(8) . ?
C17 H17 0.9300 . ?
C18 C19 1.374(7) . ?
C19 C20 1.364(7) . ?
C19 H19 0.9300 . ?
C20 H20 0.9300 . ?
C21 H21A 0.9600 . ?
C21 H21B 0.9600 . ?
C21 H21C 0.9600 . ?
C22 C23 1.322(6) . ?
C22 H22 0.9300 . ?
C23 C24 1.450(6) . ?
C23 H23 0.9300 . ?
C24 C25 1.383(7) . ?
C24 C29 1.384(6) . ?
C25 C26 1.378(7) . ?
C25 H25 0.9300 . ?
C26 C27 1.382(8) . ?
C26 H26 0.9300 . ?
C27 C28 1.371(8) . ?
C28 C29 1.361(8) . ?
C28 H28 0.9300 . ?
C29 H29 0.9300 . ?
C30 H30A 0.9600 . ?
C30 H30B 0.9600 . ?
C30 H30C 0.9600 . ?
P1 C31 1.817(5) . ?
P1 C37 1.822(5) . ?
P1 C43 1.832(4) . ?
P2 C61 1.826(4) . ?
P2 C55 1.828(5) . ?
P2 C54 1.839(4) . ?
O1 C49 1.375(5) . ?
O1 C48 1.386(6) . ?
C31 C32 1.375(6) . ?
C31 C36 1.379(7) . ?
C32 C33 1.380(7) . ?
C32 H32 0.9300 . ?
C33 C34 1.362(9) . ?
C33 H33 0.9300 . ?
C34 C35 1.350(9) . ?
C34 H34 0.9300 . ?
C35 C36 1.383(8) . ?
C35 H35 0.9300 . ?
C36 H36 0.9300 . ?
C37 C42 1.376(6) . ?
C37 C38 1.380(7) . ?
C38 C39 1.371(8) . ?
C38 H38 0.9300 . ?
C39 C40 1.370(9) . ?
C39 H39 0.9300 . ?
C40 C41 1.366(9) . ?
C40 H40 0.9300 . ?
C41 C42 1.375(8) . ?
C41 H41 0.9300 . ?
C42 H42 0.9300 . ?
C43 C44 1.379(6) . ?
C43 C48 1.384(6) . ?
C44 C45 1.385(7) . ?
C44 H44 0.9300 . ?
C45 C46 1.363(9) . ?
C45 H45 0.9300 . ?
C46 C47 1.374(8) . ?
C46 H46 0.9300 . ?
C47 C48 1.381(7) . ?
C47 H47 0.9300 . ?
C49 C54 1.374(6) . ?
C49 C50 1.380(7) . ?
C50 C51 1.358(8) . ?
C50 H50 0.9300 . ?
C51 C52 1.355(8) . ?
C51 H51 0.9300 . ?
C52 C53 1.387(7) . ?
C52 H52 0.9300 . ?
C53 C54 1.392(6) . ?
C53 H53 0.9300 . ?
C55 C56 1.382(6) . ?
C55 C60 1.385(7) . ?
C56 C57 1.383(7) . ?
C56 H56 0.9300 . ?
C57 C58 1.355(8) . ?
C57 H57 0.9300 . ?
C58 C59 1.366(8) . ?
C58 H58 0.9300 . ?
C59 C60 1.393(8) . ?
C59 H59 0.9300 . ?
C60 H60 0.9300 . ?
C61 C66 1.376(6) . ?
C61 C62 1.392(6) . ?
C62 C63 1.378(7) . ?
C62 H62 0.9300 . ?
C63 C64 1.372(8) . ?
C63 H63 0.9300 . ?
C64 C65 1.372(8) . ?
C64 H64 0.9300 . ?
C65 C66 1.374(6) . ?
C65 H65 0.9300 . ?
C66 H66 0.9300 . ?
B1 F2 1.344(7) . ?
B1 F3 1.352(7) . ?
B1 F4 1.356(7) . ?
B1 F1 1.369(7) . ?
 
loop_
 _geom_angle_atom_site_label_1
 _geom_angle_atom_site_label_2
 _geom_angle_atom_site_label_3
 _geom_angle
 _geom_angle_site_symmetry_1
 _geom_angle_site_symmetry_3
 _geom_angle_publ_flag
N1 Ag1 N2 70.47(11) . . ?
N1 Ag1 P2 114.58(8) . . ?
N2 Ag1 P2 118.76(8) . . ?
N1 Ag1 P1 117.90(8) . . ?
N2 Ag1 P1 110.36(8) . . ?
P2 Ag1 P1 116.66(4) . . ?
C1 N1 C9 118.9(3) . . ?
C1 N1 Ag1 125.0(3) . . ?
C9 N1 Ag1 115.9(2) . . ?
C12 N2 C8 119.2(4) . . ?
C12 N2 Ag1 124.9(3) . . ?
C8 N2 Ag1 115.7(2) . . ?
C21 S1 C18 104.7(4) . . ?
C30 S2 C27 102.5(3) . . ?
N1 C1 C2 121.2(4) . . ?
N1 C1 C22 116.5(4) . . ?
C2 C1 C22 122.3(4) . . ?
C3 C2 C1 120.1(4) . . ?
C3 C2 H2 119.9 . . ?
C1 C2 H2 119.9 . . ?
C2 C3 C4 119.9(4) . . ?
C2 C3 H3 120.1 . . ?
C4 C3 H3 120.1 . . ?
C3 C4 C9 117.6(4) . . ?
C3 C4 C5 122.1(4) . . ?
C9 C4 C5 120.2(4) . . ?
C6 C5 C4 120.5(4) . . ?
C6 C5 H5 119.8 . . ?
C4 C5 H5 119.8 . . ?
C5 C6 C7 121.3(4) . . ?
C5 C6 H6 119.3 . . ?
C7 C6 H6 119.3 . . ?
C10 C7 C8 116.7(4) . . ?
C10 C7 C6 122.8(4) . . ?
C8 C7 C6 120.5(4) . . ?
N2 C8 C7 122.6(4) . . ?
N2 C8 C9 118.8(4) . . ?
C7 C8 C9 118.5(4) . . ?
N1 C9 C4 122.2(4) . . ?
N1 C9 C8 119.0(3) . . ?
C4 C9 C8 118.8(4) . . ?
C11 C10 C7 120.4(4) . . ?
C11 C10 H10 119.8 . . ?
C7 C10 H10 119.8 . . ?
C10 C11 C12 120.2(4) . . ?
C10 C11 H11 119.9 . . ?
C12 C11 H11 119.9 . . ?
N2 C12 C11 120.8(4) . . ?
N2 C12 C13 116.8(4) . . ?
C11 C12 C13 122.4(4) . . ?
C14 C13 C12 127.1(4) . . ?
C14 C13 H13 116.5 . . ?
C12 C13 H13 116.5 . . ?
C13 C14 C15 126.5(4) . . ?
C13 C14 H14 116.8 . . ?
C15 C14 H14 116.8 . . ?
C16 C15 C20 117.4(5) . . ?
C16 C15 C14 119.4(4) . . ?
C20 C15 C14 123.2(4) . . ?
C17 C16 C15 121.1(5) . . ?
C17 C16 H16 119.4 . . ?
C15 C16 H16 119.4 . . ?
C16 C17 C18 120.5(5) . . ?
C16 C17 H17 119.7 . . ?
C18 C17 H17 119.7 . . ?
C19 C18 C17 118.8(5) . . ?
C19 C18 S1 117.1(5) . . ?
C17 C18 S1 124.1(5) . . ?
C20 C19 C18 120.6(5) . . ?
C20 C19 H19 119.7 . . ?
C18 C19 H19 119.7 . . ?
C19 C20 C15 121.5(5) . . ?
C19 C20 H20 119.3 . . ?
C15 C20 H20 119.3 . . ?
S1 C21 H21A 109.5 . . ?
S1 C21 H21B 109.5 . . ?
H21A C21 H21B 109.5 . . ?
S1 C21 H21C 109.5 . . ?
H21A C21 H21C 109.5 . . ?
H21B C21 H21C 109.5 . . ?
C23 C22 C1 126.2(4) . . ?
C23 C22 H22 116.9 . . ?
C1 C22 H22 116.9 . . ?
C22 C23 C24 126.3(4) . . ?
C22 C23 H23 116.8 . . ?
C24 C23 H23 116.8 . . ?
C25 C24 C29 116.8(5) . . ?
C25 C24 C23 123.5(4) . . ?
C29 C24 C23 119.7(5) . . ?
C26 C25 C24 121.7(5) . . ?
C26 C25 H25 119.1 . . ?
C24 C25 H25 119.1 . . ?
C25 C26 C27 119.7(6) . . ?
C25 C26 H26 120.2 . . ?
C27 C26 H26 120.2 . . ?
C28 C27 C26 119.3(5) . . ?
C28 C27 S2 117.4(4) . . ?
C26 C27 S2 123.2(5) . . ?
C29 C28 C27 120.1(5) . . ?
C29 C28 H28 120.0 . . ?
C27 C28 H28 120.0 . . ?
C28 C29 C24 122.3(6) . . ?
C28 C29 H29 118.8 . . ?
C24 C29 H29 118.8 . . ?
S2 C30 H30A 109.5 . . ?
S2 C30 H30B 109.5 . . ?
H30A C30 H30B 109.5 . . ?
S2 C30 H30C 109.5 . . ?
H30A C30 H30C 109.5 . . ?
H30B C30 H30C 109.5 . . ?
C31 P1 C37 104.5(2) . . ?
C31 P1 C43 102.0(2) . . ?
C37 P1 C43 104.3(2) . . ?
C31 P1 Ag1 119.83(15) . . ?
C37 P1 Ag1 110.48(15) . . ?
C43 P1 Ag1 114.16(15) . . ?
C61 P2 C55 103.4(2) . . ?
C61 P2 C54 103.0(2) . . ?
C55 P2 C54 103.1(2) . . ?
C61 P2 Ag1 109.14(14) . . ?
C55 P2 Ag1 117.16(16) . . ?
C54 P2 Ag1 119.11(15) . . ?
C49 O1 C48 123.5(4) . . ?
C32 C31 C36 117.7(5) . . ?
C32 C31 P1 124.3(4) . . ?
C36 C31 P1 118.1(4) . . ?
C31 C32 C33 121.2(6) . . ?
C31 C32 H32 119.4 . . ?
C33 C32 H32 119.4 . . ?
C34 C33 C32 119.5(6) . . ?
C34 C33 H33 120.2 . . ?
C32 C33 H33 120.2 . . ?
C35 C34 C33 120.8(6) . . ?
C35 C34 H34 119.6 . . ?
C33 C34 H34 119.6 . . ?
C34 C35 C36 119.6(7) . . ?
C34 C35 H35 120.2 . . ?
C36 C35 H35 120.2 . . ?
C31 C36 C35 121.1(6) . . ?
C31 C36 H36 119.4 . . ?
C35 C36 H36 119.4 . . ?
C42 C37 C38 118.9(5) . . ?
C42 C37 P1 118.0(4) . . ?
C38 C37 P1 123.1(4) . . ?
C39 C38 C37 120.1(6) . . ?
C39 C38 H38 119.9 . . ?
C37 C38 H38 119.9 . . ?
C40 C39 C38 120.7(6) . . ?
C40 C39 H39 119.7 . . ?
C38 C39 H39 119.7 . . ?
C41 C40 C39 119.4(6) . . ?
C41 C40 H40 120.3 . . ?
C39 C40 H40 120.3 . . ?
C40 C41 C42 120.2(6) . . ?
C40 C41 H41 119.9 . . ?
C42 C41 H41 119.9 . . ?
C41 C42 C37 120.6(5) . . ?
C41 C42 H42 119.7 . . ?
C37 C42 H42 119.7 . . ?
C44 C43 C48 118.6(4) . . ?
C44 C43 P1 124.0(4) . . ?
C48 C43 P1 117.4(4) . . ?
C43 C44 C45 120.5(5) . . ?
C43 C44 H44 119.8 . . ?
C45 C44 H44 119.8 . . ?
C46 C45 C44 119.5(6) . . ?
C46 C45 H45 120.2 . . ?
C44 C45 H45 120.2 . . ?
C45 C46 C47 121.7(5) . . ?
C45 C46 H46 119.2 . . ?
C47 C46 H46 119.2 . . ?
C46 C47 C48 118.2(6) . . ?
C46 C47 H47 120.9 . . ?
C48 C47 H47 120.9 . . ?
C47 C48 C43 121.6(5) . . ?
C47 C48 O1 125.0(5) . . ?
C43 C48 O1 113.4(4) . . ?
C54 C49 O1 116.4(4) . . ?
C54 C49 C50 122.3(5) . . ?
O1 C49 C50 121.1(5) . . ?
C51 C50 C49 119.4(6) . . ?
C51 C50 H50 120.3 . . ?
C49 C50 H50 120.3 . . ?
C52 C51 C50 120.3(5) . . ?
C52 C51 H51 119.9 . . ?
C50 C51 H51 119.9 . . ?
C51 C52 C53 120.5(5) . . ?
C51 C52 H52 119.7 . . ?
C53 C52 H52 119.7 . . ?
C52 C53 C54 120.4(5) . . ?
C52 C53 H53 119.8 . . ?
C54 C53 H53 119.8 . . ?
C49 C54 C53 117.0(4) . . ?
C49 C54 P2 120.1(3) . . ?
C53 C54 P2 122.8(4) . . ?
C56 C55 C60 118.5(5) . . ?
C56 C55 P2 118.0(4) . . ?
C60 C55 P2 123.5(4) . . ?
C55 C56 C57 121.2(5) . . ?
C55 C56 H56 119.4 . . ?
C57 C56 H56 119.4 . . ?
C58 C57 C56 119.8(6) . . ?
C58 C57 H57 120.1 . . ?
C56 C57 H57 120.1 . . ?
C57 C58 C59 120.4(6) . . ?
C57 C58 H58 119.8 . . ?
C59 C58 H58 119.8 . . ?
C58 C59 C60 120.4(6) . . ?
C58 C59 H59 119.8 . . ?
C60 C59 H59 119.8 . . ?
C55 C60 C59 119.7(5) . . ?
C55 C60 H60 120.2 . . ?
C59 C60 H60 120.2 . . ?
C66 C61 C62 118.6(4) . . ?
C66 C61 P2 124.1(4) . . ?
C62 C61 P2 117.2(4) . . ?
C63 C62 C61 120.8(5) . . ?
C63 C62 H62 119.6 . . ?
C61 C62 H62 119.6 . . ?
C64 C63 C62 119.8(5) . . ?
C64 C63 H63 120.1 . . ?
C62 C63 H63 120.1 . . ?
C65 C64 C63 119.6(5) . . ?
C65 C64 H64 120.2 . . ?
C63 C64 H64 120.2 . . ?
C64 C65 C66 121.0(5) . . ?
C64 C65 H65 119.5 . . ?
C66 C65 H65 119.5 . . ?
C65 C66 C61 120.2(5) . . ?
C65 C66 H66 119.9 . . ?
C61 C66 H66 119.9 . . ?
F2 B1 F3 110.1(6) . . ?
F2 B1 F4 111.9(5) . . ?
F3 B1 F4 105.6(5) . . ?
F2 B1 F1 108.8(5) . . ?
F3 B1 F1 110.4(5) . . ?
F4 B1 F1 110.0(6) . . ?
 
_refine_diff_density_max    0.557
_refine_diff_density_min   -0.527
_refine_diff_density_rms    0.060

# start Validation Reply Form
_vrf_PLAT232_GM31_23_0m_a
;
PROBLEM: Hirshfeld Test Diff (M-X)  Ag1      --P1       .       10.6 s.u.  
RESPONSE: The assignment of the atom types is correct. The  alert is 
probably due to the size difference between Ag and P.
;
# end Validation Reply Form

_shelx_res_file
;
TITL GM31_23_0m_a.res in P2(1)/c
    GM31_23_0m_a.res
    created by SHELXL-2018/3 at 14:37:15 on 29-Mar-2024
REM Old TITL GM31_23_0m in P2(1)/c
REM SHELXT solution in P2(1)/c
REM R1 0.161,  Rweak 0.092,  Alpha 0.063,  Orientation as input
REM Formula found by SHELXT:  C66 Ag B F5 N2 S4
CELL  0.71073  14.2376  20.6038  20.3351   90.000  104.476   90.000
ZERR    4.000   0.0012   0.0017   0.0016    0.000    0.003    0.000
LATT  1
SYMM -X, 1/2+Y, 1/2-Z
SFAC C H AG B F N P S O
UNIT 264 208 4 4 16 8 8 8 4
TEMP 23.000
SIZE 0.06 0.08 0.30
ACTA
OMIT 0 50
OMIT 0 2 1
OMIT -8 1 23
OMIT 0 1 2
OMIT -6 1 24
OMIT -2 0 2
OMIT -8 2 23
L.S. 4
BOND $H
LIST 4
FMAP 2
PLAN 5
WGHT    0.021900   10.281600
FVAR       0.18822
AG1   3    0.240216    0.276820    0.646845    11.00000    0.04290    0.03906 =
         0.04752   -0.00764    0.01559   -0.00082
REM N^N LIGAND
N1    6    0.321163    0.208778    0.583585    11.00000    0.03557    0.03675 =
         0.03945   -0.00177    0.00877    0.00242
N2    6    0.150822    0.178233    0.617630    11.00000    0.03382    0.04151 =
         0.03840   -0.00052    0.01140   -0.00032
S1    8   -0.184208    0.399241    0.873483    11.00000    0.21297    0.11227 =
         0.14089   -0.05141    0.12008   -0.02834
S2    8    0.751844    0.538236    0.731451    11.00000    0.08970    0.09491 =
         0.15354   -0.02603    0.02410   -0.04269
C1    1    0.406177    0.222230    0.570045    11.00000    0.03920    0.04775 =
         0.04297   -0.00220    0.01431    0.00095

C2    1    0.452059    0.177099    0.536217    11.00000    0.04297    0.06133 =
         0.05675   -0.00411    0.02385    0.00529
AFIX  43
H2    2    0.511418    0.187248    0.527462    11.00000   -1.20000
AFIX   0
C3    1    0.409973    0.119187    0.516518    11.00000    0.05043    0.05599 =
         0.05759   -0.01170    0.01912    0.01264
AFIX  43
H3    2    0.440372    0.089417    0.494323    11.00000   -1.20000
AFIX   0
C4    1    0.320904    0.104113    0.529509    11.00000    0.04850    0.04328 =
         0.04094   -0.00236    0.00822    0.00742
C5    1    0.271966    0.044280    0.508065    11.00000    0.06898    0.04084 =
         0.06057   -0.01030    0.01819    0.00945
AFIX  43
H5    2    0.300159    0.013814    0.485190    11.00000   -1.20000
AFIX   0
C6    1    0.185827    0.031769    0.520670    11.00000    0.06801    0.03891 =
         0.06032   -0.01243    0.01296   -0.00866
AFIX  43
H6    2    0.153928   -0.006720    0.504931    11.00000   -1.20000
AFIX   0
C7    1    0.142410    0.075915    0.557435    11.00000    0.05461    0.04184 =
         0.04640   -0.00300    0.00851   -0.00679
C8    1    0.187757    0.135546    0.580059    11.00000    0.03923    0.03711 =
         0.03977    0.00095    0.00723    0.00134
C9    1    0.278933    0.150597    0.564363    11.00000    0.03759    0.03766 =
         0.03342   -0.00234    0.00734    0.00466
C10   1    0.054152    0.063141    0.573919    11.00000    0.05308    0.05118 =
         0.06576   -0.01010    0.01123   -0.01661
AFIX  43
H10   2    0.021722    0.024346    0.560293    11.00000   -1.20000
AFIX   0
C11   1    0.016233    0.106727    0.609329    11.00000    0.04189    0.06262 =
         0.06384   -0.00201    0.01574   -0.01517
AFIX  43
H11   2   -0.043507    0.098731    0.618515    11.00000   -1.20000
AFIX   0
C12   1    0.066964    0.164643    0.632603    11.00000    0.03745    0.05201 =
         0.04234    0.00021    0.01088   -0.00300
C13   1    0.031935    0.211511    0.674257    11.00000    0.03958    0.05989 =
         0.04926   -0.00392    0.01322   -0.00568
AFIX  43
H13   2    0.074154    0.245018    0.692593    11.00000   -1.20000
AFIX   0
C14   1   -0.053407    0.211721    0.688935    11.00000    0.04229    0.06281 =
         0.05362   -0.00420    0.01447   -0.00808
AFIX  43
H14   2   -0.095898    0.178330    0.670674    11.00000   -1.20000
AFIX   0
C15   1   -0.087472    0.259003    0.730825    11.00000    0.04251    0.06341 =
         0.04910   -0.00238    0.01524   -0.00310
C16   1   -0.171861    0.247014    0.750424    11.00000    0.05595    0.07085 =
         0.07565   -0.00699    0.03170   -0.00911
AFIX  43
H16   2   -0.208018    0.210117    0.734444    11.00000   -1.20000
AFIX   0
C17   1   -0.203459    0.288717    0.793216    11.00000    0.07812    0.08208 =
         0.09334   -0.00590    0.05707   -0.00772
AFIX  43
H17   2   -0.260650    0.279772    0.805705    11.00000   -1.20000
AFIX   0
C18   1   -0.151070    0.343607    0.817707    11.00000    0.08922    0.07677 =
         0.06790   -0.01211    0.03786   -0.00413
C19   1   -0.069024    0.357389    0.796300    11.00000    0.07629    0.07594 =
         0.08046   -0.01845    0.02859   -0.01453
AFIX  43
H19   2   -0.034369    0.395166    0.811000    11.00000   -1.20000
AFIX   0
C20   1   -0.038000    0.316139    0.753686    11.00000    0.05221    0.07211 =
         0.07399   -0.01097    0.02597   -0.01146
AFIX  43
H20   2    0.017499    0.326447    0.739590    11.00000   -1.20000
AFIX   0
C21   1   -0.262092    0.359102    0.906928    11.00000    0.24902    0.13546 =
         0.23066   -0.04206    0.17931    0.00756
AFIX 137
H21A  2   -0.309107    0.337673    0.871470    11.00000   -1.50000
H21B  2   -0.294455    0.388982    0.930087    11.00000   -1.50000
H21C  2   -0.227775    0.327428    0.938576    11.00000   -1.50000
AFIX   0
C22   1    0.449925    0.284290    0.594272    11.00000    0.04637    0.04528 =
         0.05294   -0.00200    0.02115   -0.00227
AFIX  43
H22   2    0.409947    0.314989    0.607013    11.00000   -1.20000
AFIX   0
C23   1    0.541156    0.301246    0.599918    11.00000    0.04452    0.05459 =
         0.06597    0.00132    0.02365   -0.00152
AFIX  43
H23   2    0.579587    0.272054    0.583450    11.00000   -1.20000
AFIX   0
C24   1    0.587100    0.360945    0.629300    11.00000    0.04816    0.05690 =
         0.06607    0.00333    0.02083   -0.00875
C25   1    0.538039    0.410519    0.652262    11.00000    0.05364    0.08085 =
         0.10432   -0.02254    0.03772   -0.02371
AFIX  43
H25   2    0.471317    0.407112    0.646391    11.00000   -1.20000
AFIX   0
C26   1    0.585399    0.464816    0.683603    11.00000    0.07967    0.07811 =
         0.11128   -0.03354    0.04361   -0.03107
AFIX  43
H26   2    0.550737    0.497743    0.698184    11.00000   -1.20000
AFIX   0
C27   1    0.684716    0.470111    0.693271    11.00000    0.06000    0.07323 =
         0.08116    0.00111    0.00818   -0.02856
C28   1    0.733981    0.422460    0.668726    11.00000    0.04758    0.07152 =
         0.13533    0.01123    0.00532   -0.00881
AFIX  43
H28   2    0.800286    0.426626    0.673032    11.00000   -1.20000
AFIX   0
C29   1    0.685992    0.369073    0.638070    11.00000    0.04590    0.05752 =
         0.11995    0.00921    0.01581   -0.00298
AFIX  43
H29   2    0.720862    0.336919    0.622464    11.00000   -1.20000
AFIX   0
C30   1    0.671730    0.577453    0.766292    11.00000    0.11181    0.11756 =
         0.09519   -0.02691    0.02116   -0.06017
AFIX 137
H30A  2    0.614958    0.588378    0.731358    11.00000   -1.50000
H30B  2    0.700944    0.616404    0.788107    11.00000   -1.50000
H30C  2    0.653811    0.549840    0.799188    11.00000   -1.50000
AFIX   0
REM DIPHOSPHINE LIGAND
P1    7    0.144296    0.371823    0.586257    11.00000    0.04920    0.03908 =
         0.04283   -0.00528    0.00753    0.00534
P2    7    0.331764    0.294868    0.768802    11.00000    0.04382    0.04681 =
         0.03918   -0.00090    0.00962   -0.00324
O1    9    0.263178    0.420499    0.707400    11.00000    0.08560    0.06407 =
         0.06335   -0.02801   -0.01567    0.02618
C31   1    0.032606    0.357613    0.521506    11.00000    0.05230    0.04269 =
         0.05177   -0.00490    0.00287    0.00813
C32   1    0.009195    0.387525    0.459111    11.00000    0.05541    0.06771 =
         0.05844   -0.00165    0.00610    0.01391
AFIX  43
H32   2    0.051632    0.417854    0.448660    11.00000   -1.20000
AFIX   0
C33   1   -0.076094    0.373391    0.411699    11.00000    0.06967    0.09369 =
         0.06709   -0.00360   -0.00657    0.02370
AFIX  43
H33   2   -0.090022    0.393045    0.369189    11.00000   -1.20000
AFIX   0
C34   1   -0.139751    0.330444    0.427599    11.00000    0.06436    0.09349 =
         0.09340   -0.01784   -0.01934    0.01264
AFIX  43
H34   2   -0.197517    0.321159    0.395820    11.00000   -1.20000
AFIX   0
C35   1   -0.119993    0.301195    0.488934    11.00000    0.07024    0.09847 =
         0.12037   -0.00092   -0.00782   -0.02798
AFIX  43
H35   2   -0.164353    0.272473    0.499617    11.00000   -1.20000
AFIX   0
C36   1   -0.033357    0.314208    0.535800    11.00000    0.08170    0.07852 =
         0.08111    0.01077   -0.00743   -0.01960
AFIX  43
H36   2   -0.019346    0.293328    0.577670    11.00000   -1.20000
AFIX   0
C37   1    0.218469    0.420281    0.543632    11.00000    0.05348    0.04755 =
         0.04019   -0.00121    0.00737    0.00207
C38   1    0.223218    0.487125    0.547411    11.00000    0.11440    0.05417 =
         0.07930   -0.00582    0.04805   -0.00634
AFIX  43
H38   2    0.186680    0.509529    0.572044    11.00000   -1.20000
AFIX   0
C39   1    0.281705    0.520558    0.514915    11.00000    0.14534    0.06882 =
         0.08747   -0.00372    0.05187   -0.02259
AFIX  43
H39   2    0.284151    0.565622    0.517365    11.00000   -1.20000
AFIX   0
C40   1    0.336589    0.488253    0.478865    11.00000    0.09711    0.10676 =
         0.08162    0.01247    0.03488   -0.02408
AFIX  43
H40   2    0.378605    0.511012    0.458859    11.00000   -1.20000
AFIX   0
C41   1    0.329059    0.422327    0.472564    11.00000    0.09063    0.10857 =
         0.08376    0.00889    0.04824    0.01747
AFIX  43
H41   2    0.363221    0.400357    0.445990    11.00000   -1.20000
AFIX   0
C42   1    0.271163    0.388355    0.505367    11.00000    0.07336    0.06109 =
         0.06861   -0.00157    0.02547    0.01135
AFIX  43
H42   2    0.267577    0.343384    0.501662    11.00000   -1.20000
AFIX   0
C43   1    0.104936    0.429361    0.642625    11.00000    0.05903    0.03858 =
         0.04774   -0.00123    0.01771    0.00283
C44   1    0.012121    0.453962    0.630838    11.00000    0.06132    0.05726 =
         0.07673   -0.00932    0.02948    0.00274
AFIX  43
H44   2   -0.033811    0.442948    0.591217    11.00000   -1.20000
AFIX   0
C45   1   -0.013143    0.494956    0.677604    11.00000    0.07428    0.07394 =
         0.11649   -0.01992    0.05427   -0.00027
AFIX  43
H45   2   -0.075239    0.512466    0.668902    11.00000   -1.20000
AFIX   0
C46   1    0.053670    0.509450    0.736478    11.00000    0.11240    0.07553 =
         0.09363   -0.02403    0.06609   -0.00463
AFIX  43
H46   2    0.035706    0.535862    0.768363    11.00000   -1.20000
AFIX   0
C47   1    0.146912    0.486017    0.749907    11.00000    0.11171    0.05684 =
         0.05628   -0.01684    0.02235   -0.00165
AFIX  43
H47   2    0.192071    0.496598    0.790050    11.00000   -1.20000
AFIX   0
C48   1    0.171737    0.446319    0.702158    11.00000    0.07696    0.04040 =
         0.05284   -0.00289    0.01383    0.00699
C49   1    0.340366    0.430102    0.762613    11.00000    0.06832    0.05574 =
         0.04478   -0.00975    0.00856   -0.00627
C50   1    0.375811    0.491578    0.781057    11.00000    0.10929    0.05358 =
         0.06504   -0.01135    0.00957   -0.00644
AFIX  43
H50   2    0.345618    0.527723    0.757570    11.00000   -1.20000
AFIX   0
C51   1    0.455187    0.498790    0.833823    11.00000    0.09573    0.06472 =
         0.08573   -0.02351    0.02744   -0.02833
AFIX  43
H51   2    0.477948    0.540147    0.847686    11.00000   -1.20000
AFIX   0
C52   1    0.501368    0.445982    0.866363    11.00000    0.06007    0.08814 =
         0.08104   -0.02378    0.00373   -0.02587
AFIX  43
H52   2    0.556846    0.451298    0.901529    11.00000   -1.20000
AFIX   0
C53   1    0.466543    0.384068    0.847630    11.00000    0.05796    0.07586 =
         0.06186   -0.00276    0.00043   -0.01390
AFIX  43
H53   2    0.498437    0.348200    0.870629    11.00000   -1.20000
AFIX   0
C54   1    0.384182    0.375260    0.794641    11.00000    0.04725    0.05448 =
         0.04064   -0.00395    0.01458   -0.01125
C55   1    0.432126    0.239654    0.804231    11.00000    0.04570    0.05231 =
         0.05125    0.00461    0.00876   -0.00276
C56   1    0.490541    0.220275    0.762829    11.00000    0.05709    0.07376 =
         0.06513    0.00945    0.01782    0.00684
AFIX  43
H56   2    0.478740    0.236441    0.718819    11.00000   -1.20000
AFIX   0
C57   1    0.566232    0.177267    0.785699    11.00000    0.05707    0.09146 =
         0.10217    0.00841    0.03190    0.01038
AFIX  43
H57   2    0.605408    0.165136    0.757410    11.00000   -1.20000
AFIX   0
C58   1    0.583135    0.152852    0.849476    11.00000    0.05049    0.11079 =
         0.11124    0.03679    0.01249    0.01903
AFIX  43
H58   2    0.632897    0.123004    0.864424    11.00000   -1.20000
AFIX   0
C59   1    0.527568    0.171797    0.891934    11.00000    0.06917    0.12830 =
         0.08061    0.04873    0.00795    0.02085
AFIX  43
H59   2    0.540663    0.155502    0.935941    11.00000   -1.20000
AFIX   0
C60   1    0.451406    0.215365    0.869765    11.00000    0.06093    0.09637 =
         0.06029    0.01730    0.01179    0.01112
AFIX  43
H60   2    0.413684    0.228084    0.898822    11.00000   -1.20000
AFIX   0
C61   1    0.249502    0.282710    0.823695    11.00000    0.04401    0.05672 =
         0.04158    0.00096    0.00808   -0.00580
C62   1    0.207018    0.221745    0.822646    11.00000    0.06648    0.06019 =
         0.06263    0.00417    0.02195   -0.00527
AFIX  43
H62   2    0.222737    0.189102    0.795662    11.00000   -1.20000
AFIX   0
C63   1    0.141976    0.209174    0.861091    11.00000    0.07344    0.07304 =
         0.08012    0.01845    0.02724   -0.01498
AFIX  43
H63   2    0.115195    0.167979    0.860850    11.00000   -1.20000
AFIX   0
C64   1    0.116817    0.257621    0.899745    11.00000    0.06394    0.09956 =
         0.06287    0.01485    0.03098   -0.00780
AFIX  43
H64   2    0.072374    0.249575    0.925393    11.00000   -1.20000
AFIX   0
C65   1    0.157642    0.317993    0.900311    11.00000    0.06185    0.09676 =
         0.04652   -0.01368    0.01756   -0.00755
AFIX  43
H65   2    0.140414    0.350830    0.926421    11.00000   -1.20000
AFIX   0
C66   1    0.223633    0.330652    0.862852    11.00000    0.05419    0.06866 =
         0.04395   -0.01102    0.01394   -0.01424
AFIX  43
H66   2    0.250897    0.371782    0.863984    11.00000   -1.20000
AFIX   0
REM BF4
B1    4    0.704651    0.121892    0.594253    11.00000    0.05014    0.06333 =
         0.09001   -0.00997    0.01941   -0.00058
F2    5    0.786634    0.086612    0.610424    11.00000    0.05985    0.10942 =
         0.19634   -0.00543    0.00042    0.00559

F1    5    0.637396    0.089629    0.545252    11.00000    0.05839    0.10854 =
         0.13418   -0.05873    0.00763    0.00648
F3    5    0.670747    0.131406    0.649950    11.00000    0.17366    0.13976 =
         0.11351   -0.04361    0.07424   -0.04596
F4    5    0.720044    0.182006    0.571923    11.00000    0.16036    0.08503 =
         0.13557    0.01566    0.04147   -0.01478
HKLF 4


REM  GM31_23_0m_a.res in P2(1)/c
REM wR2 = 0.1143, GooF = S = 1.171, Restrained GooF = 1.171 for all data
REM R1 = 0.0649 for 7846 Fo > 4sig(Fo) and 0.0889 for all 10152 data
REM 714 parameters refined using 0 restraints

END

WGHT      0.0218     10.2812

REM Highest difference peak  0.557,  deepest hole -0.527,  1-sigma level  0.060
Q1    1  -0.1664  0.3608  0.9043  11.00000  0.05    0.56
Q2    1   0.2178  0.2773  0.5969  11.00000  0.05    0.52
Q3    1  -0.1987  0.4110  0.8654  11.00000  0.05    0.49
Q4    1   0.7889  0.1167  0.5595  11.00000  0.05    0.48
Q5    1   0.2090  0.2923  0.6831  11.00000  0.05    0.47
;
_shelx_res_checksum   71177

_shelx_hkl_file
;
  -2   0   0 3837.82  127.59
   2   0   0 3765.32  125.69
   3   0   0   56.29    4.70
   3   0   0   49.90    4.50
  -3   0   0   55.99    4.70
   3   0   0   52.19    6.70
   3   0   0   59.69   10.70
   3   0   0   59.49    5.00
   3   0   0   61.69    4.80
  -3   0   0   54.49    4.10
  -3   0   0   49.40    5.90
  -3   0   0   55.09    5.50
  -3   0   0   61.49    7.00
  -3   0   0   59.59    5.40
   4   0   0 1703.33   52.09
   4   0   0 1713.73   53.09
   4   0   0 1679.23   53.09
  -4   0   0 1797.22   57.79
  -4   0   0 1719.83   53.19
  -4   0   0 1706.93   53.19
   4   0   0 1712.63   52.09
   4   0   0 1423.26   64.69
  -4   0   0 1724.53   54.79
  -4   0   0 1679.93   52.89
   4   0   0 1713.33   57.99
  -5   0   0   52.99    6.80
  -5   0   0   62.19    6.80
  -5   0   0   64.89   10.00
   5   0   0   60.19   10.50
   5   0   0   60.89    7.20
   5   0   0   63.49    7.30
  -5   0   0   58.19    5.50
  -5   0   0   45.60    7.70
  -5   0   0   53.89    5.40
   5   0   0   55.49    5.70
   5   0   0   59.89   10.10
   5   0   0   63.19    6.60
   6   0   0   36.30    5.30
   6   0   0   48.40    7.20
  -6   0   0   37.20    5.70
  -6   0   0   37.70    6.30
  -6   0   0   32.60    5.50
   6   0   0   34.30    8.10
   6   0   0   39.50    6.70
  -6   0   0   34.50    5.80
  -6   0   0   38.00    7.80
   6   0   0   42.00    5.90
   6   0   0   42.70   10.10
  -6   0   0   30.10   10.40
   7   0   0   21.50   12.60
  -7   0   0   24.40    6.60
   7   0   0   32.90    5.80
  -7   0   0   25.70    5.70
  -7   0   0   24.10    8.40
   7   0   0   18.20    6.60
  -7   0   0   30.90   11.40
  -7   0   0   32.70    6.00
   7   0   0   18.20    5.90
  -7   0   0   28.20    6.00
   7   0   0   28.20    5.70
   7   0   0   41.00    7.50
   8   0   0   45.30    6.60
   8   0   0   51.49    7.70
  -8   0   0   66.79   14.60
  -8   0   0   44.60    8.60
  -8   0   0   39.50    7.10
   8   0   0   61.39    8.70
  -8   0   0   72.29    9.40
  -8   0   0   51.29    7.90
  -8   0   0   51.19   11.20
   8   0   0   52.09    9.50
   8   0   0   42.00   15.40
  -9   0   0  147.79   17.30
   9   0   0  155.78   13.00
  -9   0   0  143.69   13.60
  -9   0   0  147.89   18.40
  -9   0   0  119.69   12.00
  -9   0   0  158.28   11.50
  -9   0   0  125.89   17.20
   9   0   0  152.08   24.40
   9   0   0  165.48   13.10
   9   0   0  181.18   13.90
   9   0   0  151.78   19.30
   9   0   0  168.08   14.60
 -10   0   0  565.74   28.10
 -10   0   0  491.75   23.50
  10   0   0  591.74   28.20
  10   0   0  509.35   25.00
 -10   0   0  540.45   31.30
  10   0   0  524.25   31.70
  10   0   0  522.35   35.90
 -10   0   0  526.05   34.30
  10   0   0  548.45   25.30
 -10   0   0  520.45   26.30
 -10   0   0  499.75   25.00
 -11   0   0  206.68   16.10
  11   0   0  186.58   15.20
  11   0   0  177.68   25.20
  11   0   0  234.58   17.20
 -11   0   0  199.88   21.60
  11   0   0  208.58   25.20
 -11   0   0  232.18   18.60
  11   0   0  255.67   19.10
 -11   0   0  195.98   15.80
 -11   0   0  198.38   16.40
 -11   0   0  197.28   25.80
  11   0   0  217.98   17.70
 -12   0   0  124.79   13.70
 -12   0   0   97.39   13.10
 -12   0   0  110.39   14.10
  12   0   0  118.99   13.30
 -12   0   0  145.79   23.50
  12   0   0  108.79   15.40
  12   0   0  113.69   14.40
 -12   0   0   96.49   11.40
  12   0   0  132.19   24.50
 -12   0   0  130.39   20.40
 -13   0   0   53.09   11.20
 -13   0   0   53.09   10.50
  13   0   0   41.80   24.90
  13   0   0   37.90   11.50
  13   0   0   34.00    8.00
 -13   0   0   49.30   21.40
  13   0   0   57.89   11.90
  13   0   0   72.19   17.80
  13   0   0   39.70   10.40
 -13   0   0   49.30   12.50
 -13   0   0   45.40   10.20
 -13   0   0   68.49   16.90
 -14   0   0    4.80    8.80
 -14   0   0   21.00    9.00
  14   0   0   18.60    9.00
  14   0   0   20.60   10.80
  14   0   0   38.30   10.70
  14   0   0   24.40    8.50
  14   0   0   21.30   17.50
 -14   0   0   23.00    9.80
 -14   0   0   31.90   12.20
  14   0   0   42.40   26.40
 -14   0   0   22.90   12.70
  15   0   0    2.10    7.60
 -15   0   0    5.20    6.20
  15   0   0   12.60    8.10
 -15   0   0    1.90    9.60
  15   0   0   -5.70    9.40
  15   0   0    5.70   24.10
 -15   0   0    1.30   11.60
  16   0   0    7.10   10.60
  16   0   0   -2.70    9.70
   2  -1   0   34.90    2.80
   2  -1   0   39.60    3.70
   2  -1   0   35.80    3.80
  -2  -1   0   34.90    3.10
  -2  -1   0   43.40    5.20
  -2  -1   0   38.80    5.30
  -2  -1   0   30.70    2.70
  -2  -1   0   31.70    3.60
   2  -1   0   41.20    3.20
   2  -1   0   40.10    4.40
   2  -1   0   40.90    3.40
  -2  -1   0   34.00    3.70
  -2   1   0   36.80    3.90
   2   1   0   30.80    4.80
   2   1   0   37.70    3.80
   2   1   0   36.30    2.80
  -2   1   0   29.50    2.70
   2   1   0   36.60    3.20
  -2   1   0   37.90    4.50
   2   1   0   43.50    5.10
  -2   1   0   31.60    3.20
  -2   1   0   35.20    3.20
  -2   1   0   36.50    2.80
   2   1   0   44.80    3.50
  -3  -1   0  892.01   28.80
   3  -1   0  880.91   28.70
   3  -1   0  867.21   29.20
   3  -1   0  885.61   28.70
   3  -1   0  931.31   28.40
  -3  -1   0  824.02   27.50
  -3  -1   0  926.11   32.20
  -3  -1   0  854.41   28.70
   3  -1   0  865.41   27.70
  -3  -1   0  845.92   30.40
  -3  -1   0  805.02   30.30
  -3   1   0  860.41   29.50
   3   1   0  849.91   28.60
   3   1   0  919.21   28.90
  -3   1   0  857.21   28.20
   3   1   0  846.62   29.80
   3   1   0  913.81   28.00
   3   1   0  843.42   31.60
  -3   1   0  915.51   32.20
  -3   1   0  871.21   28.70
  -3   1   0  862.51   28.60
  -3   1   0  860.11   28.00
   3   1   0  831.72   27.40
  -4  -1   0  117.59    7.30
   4  -1   0  154.18   17.40
   4  -1   0  127.49   10.10
  -4  -1   0  139.79   11.80
   4  -1   0  135.59    7.80
  -4  -1   0  143.19    8.90
   4  -1   0  137.49    8.60
  -4  -1   0  141.29    8.50
  -4  -1   0  117.39   10.00
   4  -1   0  129.19    8.10
   4  -1   0  131.39    7.50
  -4  -1   0  128.59    8.70
   4   1   0  141.89   15.00
   4   1   0  117.39    7.90
   4   1   0  122.39    8.50
  -4   1   0  141.79   11.70
   4   1   0  134.19    7.50
   4   1   0  139.99    7.60
  -4   1   0  144.59    8.90
  -4   1   0  129.29    8.70
  -4   1   0  121.19    9.50
  -4   1   0  139.29    8.80
  -4   1   0  137.49    8.80
   4   1   0  127.49   12.10
  -5  -1   0  277.97   14.60
   5  -1   0  263.37   14.80
  -5  -1   0  248.48   12.00
  -5  -1   0  282.67   19.10
   5  -1   0  262.47   19.60
   5  -1   0  246.78   13.10
   5  -1   0  272.27   13.10
   5  -1   0  255.87   13.50
  -5  -1   0  264.97   13.60
  -5  -1   0  273.07   12.50
  -5  -1   0  251.77   15.00
   5  -1   0  265.77   12.20
  -5   1   0  272.07   12.30
  -5   1   0  268.57   17.50
   5   1   0  260.07   12.60
   5   1   0  254.37   13.20
  -5   1   0  252.77   15.00
  -5   1   0  248.38   13.30
   5   1   0  245.08   11.90
   5   1   0  262.47   13.60
   5   1   0  268.97   22.70
  -5   1   0  257.57   13.70
   5   1   0  262.37   19.70
   6  -1   0   -2.40    3.00
   6  -1   0   -1.20    3.60
   6  -1   0   -5.50    5.60
  -6  -1   0   -0.30    2.80
  -6  -1   0    3.10    3.50
  -6  -1   0   -0.60    5.30
  -6  -1   0    0.70    5.70
  -6  -1   0   -7.40    7.80
   6  -1   0    2.60    7.20
   6  -1   0   -3.40    4.30
  -6  -1   0    2.50    3.50
   6  -1   0   -0.90    4.20
  -6   1   0    5.70    5.80
   6   1   0    0.10    3.40
  -6   1   0   -0.30    5.20
  -6   1   0    2.60    8.30
  -6   1   0    1.80    4.10
   6   1   0    2.30    4.40
   6   1   0   -2.30    6.60
   6   1   0    5.40    7.50
   6   1   0   -0.40    3.50
  -6   1   0    0.80    3.80
  -6   1   0   -4.10    4.20
   6   1   0   -6.20    4.30
  -7  -1   0  187.78   11.20
  -7  -1   0  168.58   25.30
  -7  -1   0  199.18   12.70
   7  -1   0  207.18   18.30
   7  -1   0  208.08   12.00
  -7  -1   0  188.68   11.20
   7  -1   0  185.78   12.50
  -7  -1   0  214.28   17.60
  -7  -1   0  216.68   13.90
   7  -1   0  207.98   13.00
   7  -1   0  215.38   13.70
   7  -1   0  195.48   15.80
   7   1   0  212.98   13.70
  -7   1   0  204.68   14.60
  -7   1   0  201.08   12.80
   7   1   0  204.08   11.90
   7   1   0  190.68   21.00
   7   1   0  184.98   12.90
  -7   1   0  208.38   12.90
   7   1   0  195.38   17.70
   7   1   0  204.58   12.00
  -7   1   0  216.68   12.30
  -7   1   0  200.28   11.90
  -7   1   0  186.68   17.40
   8  -1   0   38.80    8.20
  -8  -1   0   56.69   11.10
   8  -1   0   61.99   13.80
   8  -1   0   56.99    7.80
  -8  -1   0   43.50    7.30
  -8  -1   0   54.69    7.10
   8  -1   0   31.50   13.50
  -8  -1   0   60.99   12.50
  -8  -1   0   47.90    8.10
   8  -1   0   58.99    8.60
  -8  -1   0   71.29    9.90
   8  -1   0   53.69    9.10
  -8   1   0   53.89    8.20
   8   1   0   40.30    9.70
  -8   1   0   57.19    8.10
   8   1   0   59.59    9.10
  -8   1   0   44.00    8.50
  -8   1   0   34.10   13.00
   8   1   0   55.49    7.50
  -8   1   0   50.69    7.80
   8   1   0   37.40   12.30
   8   1   0   50.99    7.50
  -8   1   0   49.99   13.90
   9  -1   0  525.05   25.20
   9  -1   0  508.05   27.90
  -9  -1   0  463.95   27.20
  -9  -1   0  506.75   31.20
  -9  -1   0  501.45   25.20
   9  -1   0  499.25   24.50
   9  -1   0  498.35   23.00
  -9  -1   0  492.45   22.90
  -9  -1   0  481.85   35.10
   9  -1   0  496.65   22.70
  -9  -1   0  526.35   23.00
   9  -1   0  480.15   32.40
  -9   1   0  475.15   27.70
  -9   1   0  470.45   23.30
  -9   1   0  471.25   27.50
  -9   1   0  495.15   22.70
   9   1   0  528.25   30.50
  -9   1   0  529.85   34.10
   9   1   0  501.05   25.10
  -9   1   0  510.85   24.40
   9   1   0  492.25   22.90
   9   1   0  409.46   22.70
   9   1   0  461.35   32.30
   9   1   0  509.75   22.60
 -10  -1   0  238.68   22.90
  10  -1   0  264.87   26.40
 -10  -1   0  297.47   20.20
 -10  -1   0  282.77   19.40
 -10  -1   0  246.48   15.70
  10  -1   0  262.17   23.70
 -10  -1   0  277.07   24.60
  10  -1   0  263.27   18.10
  10  -1   0  258.37   18.50
  10  -1   0  282.37   19.30
 -10  -1   0  241.88   16.50
  10  -1   0  260.37   16.70
 -10   1   0  274.37   17.30
 -10   1   0  327.07   20.30
 -10   1   0  252.17   17.40
 -10   1   0  248.28   17.30
  10   1   0  271.37   18.60
  10   1   0  279.17   26.50
 -10   1   0  252.47   24.50
  10   1   0  271.47   31.00
  10   1   0  286.07   19.20
 -10   1   0  267.47   21.70
  10   1   0  283.87   17.30
  10   1   0  309.27   17.60
  11  -1   0  173.68   16.30
  11  -1   0  209.88   17.80
 -11  -1   0  180.88   15.80
  11  -1   0  216.98   17.40
 -11  -1   0  180.58   15.00
 -11  -1   0  177.58   13.70
 -11  -1   0  198.18   22.10
  11  -1   0  174.88   24.60
 -11  -1   0  199.98   17.70
  11  -1   0  196.38   22.80
 -11  -1   0  201.88   26.50
  11  -1   0  215.68   17.40
 -11   1   0  173.88   25.50
 -11   1   0  176.38   20.50
 -11   1   0  165.68   15.60
  11   1   0  198.48   26.00
 -11   1   0  167.58   14.90
  11   1   0  214.78   30.30
 -11   1   0  198.58   16.10
  11   1   0  204.18   17.10
  11   1   0  182.48   13.80
 -11   1   0  182.18   15.20
  11   1   0  186.18   15.50
  11   1   0  167.78   17.00
  12  -1   0   85.59   11.90
 -12  -1   0   79.69   13.70
  12  -1   0   85.39   25.40
  12  -1   0   77.19   12.50
  12  -1   0   62.79   11.50
  12  -1   0   71.89   12.20
 -12  -1   0  113.09   15.40
 -12  -1   0   75.59   11.30
 -12  -1   0   90.79   12.20
 -12  -1   0   91.49   16.90
  12   1   0   55.39   11.20
  12   1   0   71.19   14.10
 -12   1   0   83.69   12.00
 -12   1   0   94.29   14.80
  12   1   0   80.89   11.90
  12   1   0   87.99   19.40
  12   1   0   70.59   20.20
 -12   1   0   85.69   11.70
 -12   1   0   74.19   20.30
 -12   1   0   88.39   18.20
 -12   1   0   70.69   11.40
  12   1   0  114.49   14.20
 -13  -1   0   95.69   12.80
  13  -1   0   77.09   27.00
 -13  -1   0  113.79   15.70
 -13  -1   0   82.69   12.30
 -13  -1   0   85.89   14.70
 -13  -1   0   79.89   22.10
  13  -1   0   79.09   11.90
  13  -1   0   70.09   11.30
  13  -1   0   51.99   10.20
  13  -1   0   90.99   18.40
 -13  -1   0   96.89   18.50
 -13   1   0   91.39   12.70
 -13   1   0   68.79   12.10
  13   1   0   85.59   15.20
  13   1   0   47.60   10.30
  13   1   0   89.59   19.50
  13   1   0   84.89   28.20
  13   1   0   90.59   12.60
 -13   1   0   99.59   15.30
 -13   1   0   65.59   11.60
  13   1   0  107.99   22.90
 -13   1   0  112.59   19.10
  14  -1   0   30.60   24.90
 -14  -1   0   25.80    9.10
  14  -1   0   14.80    8.20
  14  -1   0   15.90    8.50
 -14  -1   0   30.80   18.00
 -14  -1   0   15.90    7.90
 -14  -1   0   33.90   12.70
 -14  -1   0   18.00    7.00
  14  -1   0   30.90   11.70
  14  -1   0    2.70    9.40
 -14  -1   0   48.90   15.00
  14   1   0   27.40   11.90
  14   1   0   30.50   13.90
  14   1   0   10.00    5.80
 -14   1   0   28.80    9.60
 -14   1   0    2.30    6.40
  14   1   0   22.40    7.70
  14   1   0   14.70   23.70
 -14   1   0   25.20   12.70
 -14   1   0   18.90    9.10
 -14   1   0   35.50   10.60
  14   1   0   13.70    9.90
 -14   1   0   58.79   14.70
  15  -1   0   -4.10   10.20
 -15  -1   0   56.89   12.40
  15  -1   0   13.90   26.40
  15  -1   0    8.00   16.40
 -15  -1   0   10.40    6.70
  15  -1   0    0.90   10.30
  15  -1   0    9.50   11.40
 -15  -1   0   -2.10   15.30
 -15   1   0    9.10    9.90
  15   1   0   -1.80    7.30
 -15   1   0   17.30   12.80
 -15   1   0    7.10    6.40
  15   1   0    6.60   11.90
 -15   1   0   24.00    9.80
  15   1   0   24.20   10.30
  15   1   0   25.60   10.70
 -15   1   0   24.00    9.20
  15   1   0   56.59   27.30
  16  -1   0    0.70   36.40
  16  -1   0   -1.10    6.50
 -16  -1   0   20.20   14.60
 -16  -1   0   -4.40   13.00
  16  -1   0   10.20    8.60
  16  -1   0    0.40   10.20
  16  -1   0  -10.20    5.80
 -16  -1   0    1.50    7.40
 -16   1   0    6.00    9.00
 -16   1   0    8.70   12.10
 -16   1   0  -12.90   12.10
  16   1   0  -20.10   21.90
  16   1   0  -14.90    8.30
  16   1   0   -4.50    9.60
 -16   1   0    3.30   11.80
  -1  -2   0    0.10    0.70
   1  -2   0    1.10    1.20
   1  -2   0   -0.40    1.00
  -1  -2   0   -2.20    1.00
  -1  -2   0    0.80    0.90
  -1   2   0   -0.20    1.10
  -1   2   0    0.00    2.40
  -1   2   0    0.90    1.20
   1   2   0    1.20    1.30
   1   2   0   -0.10    1.20
  -2  -2   0   -0.20    1.70
   2  -2   0    4.70    1.90
  -2  -2   0    2.80    1.60
   2  -2   0    3.70    2.60
   2  -2   0    2.30    2.60
  -2  -2   0   -1.30    3.60
   2  -2   0    2.70    2.90
  -2  -2   0    3.60    3.70
  -2  -2   0    1.50    2.60
   2  -2   0    1.40    3.60
   2   2   0    1.60    3.40
  -2   2   0    1.00    1.90
  -2   2   0    3.40    2.80
  -2   2   0    2.70    1.80
   2   2   0    2.10    4.00
   2   2   0   -0.60    2.40
   2   2   0    2.70    1.60
  -2   2   0   -0.30    2.40
   2   2   0    4.00    2.00
  -2   2   0    3.80    2.70
   3  -2   0  842.92   31.20
   3  -2   0  815.72   27.10
  -3  -2   0  838.72   27.50
   3  -2   0  812.62   27.40
   3  -2   0  798.42   26.40
  -3  -2   0  833.62   27.50
  -3  -2   0  876.41   26.70
   3  -2   0  795.12   27.60
   3  -2   0  805.82   27.40
  -3  -2   0  877.61   30.90
  -3  -2   0  829.62   30.10
   3   2   0  818.02   26.40
  -3   2   0  767.82   28.80
   3   2   0  804.82   27.40
  -3   2   0  836.32   31.30
  -3   2   0  806.22   27.30
   3   2   0  787.62   26.00
   3   2   0  813.82   30.90
  -3   2   0  775.42   27.60
  -3   2   0  791.62   26.60
  -3   2   0  801.62   27.40
   3   2   0  807.12   27.40
   4  -2   0  119.99   11.50
  -4  -2   0  112.69    8.30
  -4  -2   0  122.79   11.00
  -4  -2   0  115.19    7.70
   4  -2   0  116.79    7.60
  -4  -2   0  128.29    7.10
  -4  -2   0  109.09    6.50
   4  -2   0  103.49    8.80
   4  -2   0  126.79    7.80
   4  -2   0  108.49    7.60
   4  -2   0  116.19    9.10
  -4  -2   0  102.19   12.30
  -4   2   0  101.59    8.70
  -4   2   0  125.49   11.20
   4   2   0  117.99   11.60
   4   2   0  113.69    8.20
   4   2   0  101.59   13.60
   4   2   0  119.29    7.70
   4   2   0  111.79    6.80
  -4   2   0  125.99    7.80
  -4   2   0  116.89    8.30
  -4   2   0  116.09    7.60
   4   2   0  115.69    8.30
  -4   2   0  112.49    7.60
   5  -2   0   -3.10    2.40
  -5  -2   0    0.10    4.00
   5  -2   0    7.90    9.30
   5  -2   0   -6.70    3.60
  -5  -2   0   -5.20    6.10
   5  -2   0   -0.10    5.00
   5  -2   0   -5.40    4.50
  -5  -2   0   -0.40    8.10
  -5  -2   0    2.90    2.70
  -5  -2   0   -0.50    3.00
  -5  -2   0    0.70    4.00
   5  -2   0   -1.10    3.90
  -5   2   0    4.90    4.30
   5   2   0   -2.20    5.40
   5   2   0   -2.70    3.90
  -5   2   0    1.90    4.30
  -5   2   0   -2.10    3.90
   5   2   0    0.70    9.50
   5   2   0   -2.50    1.90
   5   2   0   -0.90    3.10
  -5   2   0    0.60    2.30
   5   2   0    5.40    3.10
  -5   2   0   -1.30    7.70
  -6  -2   0  492.75   23.70
   6  -2   0  499.55   26.80
   6  -2   0  503.65   26.20
   6  -2   0  510.25   20.40
  -6  -2   0  511.15   24.70
  -6  -2   0  515.35   25.30
   6  -2   0  525.85   22.20
  -6  -2   0  504.15   21.90
  -6  -2   0  493.65   19.90
   6  -2   0  550.74   22.60
   6  -2   0  523.65   21.60
  -6  -2   0  504.55   26.20
  -6   2   0  472.75   21.10
  -6   2   0  509.55   27.80
   6   2   0  491.45   21.40
   6   2   0  496.85   24.20
  -6   2   0  533.25   20.20
  -6   2   0  486.85   21.00
   6   2   0  488.45   27.90
   6   2   0  504.85   19.80
   6   2   0  507.95   20.70
  -6   2   0  488.15   23.10
   6   2   0  491.85   21.30
  -7  -2   0    2.30    5.30
   7  -2   0   10.70    6.30
   7  -2   0    4.80    6.30
   7  -2   0    4.50    5.80
   7  -2   0    5.60   11.80
   7  -2   0   11.10    4.10
  -7  -2   0    6.00    3.40
   7  -2   0    8.80    4.30
  -7  -2   0    0.30    6.80
  -7  -2   0   10.90   10.10
  -7  -2   0    2.00    4.00
  -7  -2   0    2.80    5.40
  -7   2   0    6.20    3.50
   7   2   0    2.80    4.30
  -7   2   0    5.00    4.10
   7   2   0    3.90    3.50
  -7   2   0    4.40    7.00
   7   2   0    4.70    5.00
  -7   2   0   10.90    4.60
   7   2   0   14.30   11.90
   7   2   0    2.00    4.80
  -7   2   0    0.70    7.00
   7   2   0   15.30    9.50
  -7   2   0    2.50    3.70
   8  -2   0    7.90   13.30
  -8  -2   0   12.90    5.30
  -8  -2   0   13.30    5.00
   8  -2   0   21.00    7.30
  -8  -2   0   14.90    7.40
   8  -2   0   12.20    5.40
  -8  -2   0   17.10   11.60
   8  -2   0   13.10    5.50
   8  -2   0   20.20    6.70
  -8  -2   0   17.50    7.30
  -8  -2   0   11.30    6.00
   8  -2   0   14.80    7.80
   8   2   0   18.20   10.50
  -8   2   0   11.70    4.80
  -8   2   0   16.40   10.30
   8   2   0   14.60    9.00
  -8   2   0   22.00    7.40
   8   2   0   23.70   11.40
  -8   2   0   21.80    6.00
   8   2   0   13.40    6.30
   8   2   0   19.70    7.70
   8   2   0   16.50    5.60
  -8   2   0   26.60    6.50
  -8   2   0    2.40    8.00
  -9  -2   0  122.09   10.30
   9  -2   0  155.38   17.00
   9  -2   0  125.89   12.40
  -9  -2   0  150.18   20.70
   9  -2   0  145.59   23.60
   9  -2   0  159.88   13.50
  -9  -2   0  164.68   18.70
  -9  -2   0  139.49   12.20
   9  -2   0  158.88   13.80
   9  -2   0  122.29   13.60
  -9  -2   0  114.59   10.70
  -9   2   0  114.39   12.00
   9   2   0  147.99   21.60
   9   2   0  150.38   13.40
  -9   2   0  143.69   12.30
   9   2   0  141.29   23.90
   9   2   0  155.58   13.80
   9   2   0  127.19   10.00
  -9   2   0  138.39   14.40
   9   2   0  118.69   11.50
  -9   2   0  137.49   11.80
  -9   2   0   97.49   15.10
  -9   2   0  127.59   20.30
 -10  -2   0  168.38   15.40
  10  -2   0  177.88   19.40
 -10  -2   0  169.68   20.30
 -10  -2   0  175.28   23.70
 -10  -2   0  202.08   16.70
  10  -2   0  164.88   13.40
  10  -2   0  181.88   16.30
  10  -2   0  180.38   15.50
  10  -2   0  178.28   14.60
 -10  -2   0  168.68   13.40
  10  -2   0  195.28   28.10
 -10  -2   0  160.28   13.70
  10   2   0  190.58   23.60
 -10   2   0  197.18   16.50
 -10   2   0  141.69   17.30
 -10   2   0  174.58   13.90
 -10   2   0  167.98   20.70
  10   2   0  183.68   15.40
  10   2   0  177.28   13.50
 -10   2   0  159.08   13.00
  10   2   0  219.88   16.70
  10   2   0  183.58   15.70
  10   2   0  181.38   25.30
 -10   2   0  187.08   15.90
  11  -2   0  129.39   14.70
 -11  -2   0  136.89   15.90
 -11  -2   0  156.18   23.50
  11  -2   0  144.59   15.60
  11  -2   0  127.29   14.60
 -11  -2   0  160.28   13.10
 -11  -2   0  143.29   20.70
  11  -2   0  128.19   22.70
  11  -2   0  150.88   20.20
  11  -2   0  122.79   15.50
 -11  -2   0  149.09   15.60
 -11  -2   0  115.09   12.40
 -11   2   0  124.19   13.50
 -11   2   0  128.99   13.50
 -11   2   0  119.49   13.20
 -11   2   0  121.19   19.10
  11   2   0  143.49   13.90
  11   2   0  111.69   13.60
  11   2   0  119.69   13.00
  11   2   0  141.19   27.50
 -11   2   0  129.29   15.50
 -11   2   0  146.99   20.50
  11   2   0  122.79   13.10
  11   2   0  132.19   18.60
 -12  -2   0   62.39   16.20
 -12  -2   0   47.10   11.50
 -12  -2   0   41.90    7.80
  12  -2   0   41.40    9.90
  12  -2   0   35.70   11.00
 -12  -2   0   54.29   11.60
  12  -2   0   46.10   18.50
 -12  -2   0   53.19   10.60
  12  -2   0   30.10    9.40
 -12  -2   0   40.00   13.10
  12  -2   0   39.30   10.00
 -12   2   0   51.49   12.00
  12   2   0   55.29   15.00
  12   2   0   48.20   10.30
 -12   2   0   39.00   11.80
  12   2   0   24.90    8.60
  12   2   0   45.20   11.00
 -12   2   0   39.90    9.80
 -12   2   0   52.29   18.60
  12   2   0   62.59   10.10
  12   2   0   59.89   20.00
 -12   2   0   35.80   10.80
 -12   2   0   65.69   11.00
  13  -2   0   11.80    6.80
  13  -2   0    9.70    5.50
 -13  -2   0   53.19   16.00
 -13  -2   0   23.10    8.80
  13  -2   0   46.00   24.50
  13  -2   0   31.90    9.20
  13  -2   0   29.40   11.50
 -13  -2   0   42.50   10.30
 -13  -2   0   21.20    7.90
 -13  -2   0   24.20   13.40
 -13   2   0   21.90   11.20
  13   2   0   34.00   18.30
 -13   2   0   12.40    7.50
  13   2   0   36.20    9.30
  13   2   0   33.90    9.80
 -13   2   0   45.10   13.60
 -13   2   0   19.50    8.50
 -13   2   0   31.00   16.40
  13   2   0   19.00    6.80
 -13   2   0   28.50    9.70
  13   2   0   21.50   18.00
  14  -2   0   33.80   10.00
  14  -2   0   31.30    9.60
  14  -2   0   32.60   25.20
  14  -2   0   10.70    6.00
 -14  -2   0   17.10   10.00
 -14  -2   0   16.50    6.80
 -14  -2   0   25.70    9.30
  14  -2   0   35.90   11.80
 -14  -2   0   51.59   15.70
 -14  -2   0   22.70   18.20
  14   2   0   21.40   25.30
  14   2   0   38.80   10.20
 -14   2   0   18.00   11.10
  14   2   0   38.70   12.80
 -14   2   0   39.00   10.20
 -14   2   0   44.70   11.00
  14   2   0   25.90   31.60
  14   2   0   27.90    9.80
 -14   2   0   14.60   11.70
  14   2   0   38.40   10.90
 -14   2   0   39.60   15.80
 -14   2   0   56.49   15.30
 -15  -2   0   -1.60    7.50
 -15  -2   0    9.10    6.10
 -15  -2   0    1.50   15.60
  15  -2   0   13.00    7.90
  15  -2   0   18.00    8.90
  15  -2   0   26.50   17.10
  15  -2   0   11.30   12.30
 -15  -2   0   18.30    9.30
  15  -2   0   12.50   10.00
  15  -2   0  -11.00   25.30
  15   2   0  -11.30   19.00
  15   2   0   17.00   10.80
  15   2   0   22.70   11.30
 -15   2   0   18.40   11.00
  15   2   0   20.60   10.20
 -15   2   0   -1.90    8.30
  15   2   0   30.10   27.20
 -15   2   0   15.90    7.50
 -15   2   0   40.50   16.90
  16  -2   0  -25.40   29.30
 -16  -2   0    6.30    7.90
 -16  -2   0    2.60   15.20
  16  -2   0   -4.50    5.80
  16  -2   0   -6.30   12.20
 -16  -2   0   10.60   10.00
  16  -2   0    7.10    7.20
  16   2   0   12.20   20.50
 -16   2   0   -1.70    7.90
  16   2   0  -11.00    8.90
 -16   2   0   52.59   17.40
  16   2   0   16.40   10.00
 -16   2   0    6.80    8.70
  16   2   0    5.60   11.20
 -16   2   0  -12.50   11.00
  16   2   0    3.00    6.60
   0  -3   0   -1.00    1.30
   0  -3   0   -1.80    1.00
   0  -3   0   -2.40    2.30
   0  -3   0   -0.50    1.60
   0  -3   0   -0.20    1.50
   0  -3   0    5.20    3.00
   0   3   0    0.00    1.40
   0   3   0    1.00    0.90
   0   3   0    0.60    1.40
   0   3   0   -0.20    1.80
   0   3   0    0.60    1.80
   0   3   0    1.30    2.10
  -1  -3   0  447.66   14.80
   1  -3   0  457.45   15.80
  -1  -3   0  444.46   17.40
  -1  -3   0  455.85   15.80
   1  -3   0  463.85   15.90
  -1  -3   0  434.26   16.40
  -1  -3   0  421.76   15.30
  -1  -3   0  468.85   15.70
   1  -3   0  448.16   15.90
   1  -3   0  453.95   17.20
   1   3   0  438.56   15.30
   1   3   0  453.95   17.80
   1   3   0  452.75   15.70
  -1   3   0  455.45   15.80
  -1   3   0  457.15   15.70
  -1   3   0  466.65   16.00
  -1   3   0  453.55   14.70
  -1   3   0  449.16   17.30
  -1   3   0  428.16   15.90
   1   3   0  465.35   14.70
   1   3   0  466.45   15.90
  -2  -3   0  498.55   19.60
  -2  -3   0  506.15   18.10
   2  -3   0  498.65   18.00
  -2  -3   0  522.55   18.40
   2  -3   0  535.85   20.80
   2  -3   0  505.05   18.10
  -2  -3   0  543.15   17.40
   2  -3   0  537.95   18.30
   2  -3   0  549.15   18.50
   2  -3   0  501.85   17.10
  -2  -3   0  501.35   21.20
   2   3   0  495.05   17.50
  -2   3   0  511.45   18.60
  -2   3   0  533.45   21.00
   2   3   0  518.75   18.20
   2   3   0  500.35   20.00
  -2   3   0  508.45   18.30
   2   3   0  536.85   17.30
   2   3   0  510.65   18.30
  -2   3   0  506.45   17.10
   2   3   0  527.75   21.20
  -2   3   0  492.05   18.20
  -3  -3   0  341.27   14.30
  -3  -3   0  391.76   18.50
   3  -3   0  387.06   15.10
   3  -3   0  327.67   14.60
  -3  -3   0  348.77   13.40
   3  -3   0  363.06   18.20
  -3  -3   0  350.76   18.90
   3  -3   0  359.56   14.90
  -3  -3   0  362.46   14.90
   3  -3   0  336.67   13.50
   3  -3   0  383.86   15.70
   3   3   0  357.96   19.70
   3   3   0  377.46   13.70
  -3   3   0  351.86   17.60
   3   3   0  350.16   18.20
  -3   3   0  345.37   14.40
  -3   3   0  354.76   14.50
  -3   3   0  366.46   15.20
   3   3   0  354.86   14.50
  -3   3   0  361.96   15.30
   3   3   0  355.86   14.80
  -4  -3   0  295.47   18.00
   4  -3   0  298.77   14.60
  -4  -3   0  298.07   13.40
  -4  -3   0  278.47   18.20
   4  -3   0  278.37   13.10
  -4  -3   0  297.57   12.30
   4  -3   0  261.67   13.50
  -4  -3   0  289.67   13.20
   4  -3   0  299.27   13.90
   4  -3   0  283.87   18.30
   4  -3   0  281.67   12.50
  -4   3   0  301.57   14.10
   4   3   0  290.77   17.30
   4   3   0  279.67   17.00
   4   3   0  280.77   13.10
  -4   3   0  279.97   17.90
  -4   3   0  282.87   14.20
   4   3   0  272.97   11.80
  -4   3   0  280.47   14.30
   4   3   0  291.67   12.30
  -4   3   0  275.97   13.10
   4   3   0  298.57   13.50
   5  -3   0  439.76   19.40
  -5  -3   0  457.55   19.00
   5  -3   0  445.56   18.80
   5  -3   0  469.45   25.40
  -5  -3   0  440.96   22.10
  -5  -3   0  475.75   23.30
   5  -3   0  421.06   18.80
  -5  -3   0  450.05   18.00
  -5  -3   0  471.95   19.60
   5  -3   0  453.15   17.80
  -5   3   0  461.35   17.70
   5   3   0  455.85   21.40
  -5   3   0  419.66   18.70
   5   3   0  429.96   24.50
   5   3   0  430.96   24.30
  -5   3   0  462.45   19.50
   5   3   0  438.76   19.30
  -5   3   0  445.36   19.20
   5   3   0  436.46   17.00
   6  -3   0   35.80    6.80
   6  -3   0   38.50   12.00
   6  -3   0   47.30    7.70
   6  -3   0   52.49    8.70
  -6  -3   0   53.39    7.90
   6  -3   0   54.49    7.70
  -6  -3   0   56.69   10.60
  -6  -3   0   36.70    5.20
   6  -3   0   43.50    6.20
  -6  -3   0   54.19   12.30
  -6   3   0   61.69    6.90
  -6   3   0   49.00    7.00
  -6   3   0   48.90    9.40
   6   3   0   41.80    6.50
   6   3   0   46.20    9.10
  -6   3   0   37.40    6.90
  -6   3   0   54.89    8.50
   6   3   0   53.59    7.20
   6   3   0   53.29   10.80
   6   3   0   41.20    5.40
  -6   3   0   36.70   10.80
   6   3   0   40.40    5.70
  -7  -3   0  122.79    9.10
   7  -3   0  158.38   12.60
  -7  -3   0  137.89   11.60
   7  -3   0  147.79   16.40
   7  -3   0  120.99   12.30
   7  -3   0  140.99    9.80
  -7  -3   0  139.19   11.00
   7  -3   0  112.49   11.60
  -7  -3   0  157.38   18.10
  -7  -3   0  125.99   15.90
   7  -3   0  133.99   10.60
   7   3   0  124.09   18.60
   7   3   0  141.89   10.80
  -7   3   0  124.59    9.80
  -7   3   0  141.49   11.30
   7   3   0  137.99   10.60
  -7   3   0  138.79   11.80
   7   3   0  130.39    8.70
   7   3   0  130.89   16.20
  -7   3   0  147.39   11.80
  -7   3   0  123.59   12.40
  -7   3   0  145.49   17.60
   8  -3   0  304.57   26.80
  -8  -3   0  321.47   18.30
   8  -3   0  284.07   18.90
  -8  -3   0  292.07   22.10
  -8  -3   0  303.37   21.10
   8  -3   0  283.27   16.60
  -8  -3   0  300.07   15.50
   8  -3   0  324.07   17.20
  -8  -3   0  319.57   18.40
   8  -3   0  287.77   18.10
   8  -3   0  290.17   17.70
  -8   3   0  314.67   18.00
  -8   3   0  294.97   15.10
   8   3   0  297.57   23.80
  -8   3   0  281.47   17.70
   8   3   0  291.57   15.90
   8   3   0  313.47   18.20
  -8   3   0  322.97   25.60
  -8   3   0  282.67   19.20
   8   3   0  303.47   20.90
  -8   3   0  305.97   17.50
   8   3   0  302.37   25.00
   8   3   0  304.97   17.70
  -9  -3   0   31.00    8.20
   9  -3   0   19.30    7.20
   9  -3   0   13.10   16.30
  -9  -3   0   15.10    6.50
   9  -3   0   15.00    5.60
   9  -3   0    6.70    7.90
  -9  -3   0   15.70   10.30
  -9  -3   0   16.50    7.70
   9  -3   0   16.70    9.00
  -9  -3   0   28.10   13.60
   9  -3   0   15.50    7.30
  -9   3   0   27.30    7.80
   9   3   0   11.10    5.50
  -9   3   0   10.30    9.60
   9   3   0   21.70   12.40
   9   3   0   16.00    7.40
   9   3   0    6.50    6.40
   9   3   0   21.30    6.10
   9   3   0   14.60   10.20
  -9   3   0   -0.20    9.50
  -9   3   0   14.00    6.00
  -9   3   0    7.20    4.80
  10  -3   0  111.99   11.80
  10  -3   0  140.89   25.70
 -10  -3   0  108.59   11.80
 -10  -3   0  119.19   17.90
  10  -3   0  123.09   12.70
 -10  -3   0  120.79   13.60
  10  -3   0  108.89   14.80
  10  -3   0  123.89   13.40
 -10  -3   0  124.99   13.80
  10  -3   0  103.29   12.30
 -10  -3   0  128.99   21.10
 -10   3   0  101.99   11.90
 -10   3   0   96.69   10.80
 -10   3   0  125.59   14.30
 -10   3   0  114.99   13.90
  10   3   0  103.69   10.80
  10   3   0   93.09   12.00
  10   3   0  122.69   20.90
 -10   3   0  103.09   15.30
  10   3   0  107.19   12.60
  10   3   0  113.99   13.40
 -10   3   0  109.59   20.80
  10   3   0  104.59   24.40
 -11  -3   0   78.79   17.10
 -11  -3   0   50.19   10.20
  11  -3   0   43.10    8.90
 -11  -3   0   69.59   15.90
 -11  -3   0   66.49   12.10
  11  -3   0   54.19   10.10
  11  -3   0   58.29   13.30
  11  -3   0   66.39   13.20
  11  -3   0   78.19   24.40
  11  -3   0   63.29    9.90
 -11  -3   0   49.00   10.60
 -11   3   0   64.09   16.90
 -11   3   0   60.99   11.20
 -11   3   0   65.19   11.90
  11   3   0   58.39   10.50
  11   3   0   69.29   19.30
  11   3   0   67.09   18.80
 -11   3   0   76.59   11.30
 -11   3   0   62.39   11.10
 -11   3   0   66.59   15.20
  11   3   0   49.80    9.00
  11   3   0   70.69   11.40
  11   3   0   68.29   10.10
 -12  -3   0   43.80    9.90
  12  -3   0   48.80   12.50
  12  -3   0   57.59   18.50
  12  -3   0   51.29   10.70
 -12  -3   0   43.60   14.30
 -12  -3   0   38.70    9.80
 -12  -3   0   23.70    8.90
 -12  -3   0   40.10   14.60
  12  -3   0   45.70   11.80
  12  -3   0   46.70   13.40
  12  -3   0   23.50    7.10
 -12   3   0   45.40   14.10
  12   3   0   41.60   10.60
 -12   3   0   35.50    9.90
 -12   3   0   45.90    9.90
 -12   3   0   38.90    8.80
  12   3   0   43.10    9.10
  12   3   0   46.50   24.00
  12   3   0   38.00   14.00
 -12   3   0   50.19   10.00
  12   3   0   48.10   11.50
  12   3   0   23.60    7.30
 -12   3   0   50.99   17.80
  13  -3   0    1.80    7.50
 -13  -3   0   12.10   10.10
 -13  -3   0   22.80   13.10
  13  -3   0    9.00    8.70
  13  -3   0    6.70    8.70
  13  -3   0    8.10    7.90
 -13  -3   0   20.60   13.40
 -13  -3   0   18.40    9.00
 -13  -3   0    7.50    9.60
  13  -3   0    5.50   15.50
 -13   3   0    4.30    7.60
  13   3   0   13.00    8.70
 -13   3   0    4.40    9.40
 -13   3   0   35.80   12.30
 -13   3   0   17.20   12.00
  13   3   0    5.00    8.00
  13   3   0    2.60    9.50
  13   3   0   14.40   17.30
 -13   3   0   14.80    7.80
 -13   3   0   16.50    6.70
  13   3   0    5.60   17.70
  13   3   0   21.90   10.60
  14  -3   0   16.20   10.60
 -14  -3   0    5.70    9.30
 -14  -3   0   29.20   14.10
  14  -3   0   23.20    9.50
 -14  -3   0   20.70    7.60
  14  -3   0   27.10   12.10
  14  -3   0   21.20   19.30
 -14  -3   0   19.00    9.20
 -14  -3   0   51.39   15.80
  14  -3   0    9.90    7.00
  14   3   0   36.00   12.30
 -14   3   0   23.70    8.40
  14   3   0   16.30   10.30
  14   3   0   13.80    8.70
 -14   3   0   33.30   17.20
  14   3   0   23.70    8.80
  14   3   0   31.70   25.60
  14   3   0   50.69   21.00
 -14   3   0    4.90    7.00
 -14   3   0   22.70    7.40
 -14   3   0   19.70    9.90
  15  -3   0    0.90    9.00
  15  -3   0   -4.00    6.70
  15  -3   0    3.60   18.50
 -15  -3   0   -3.90    8.40
 -15  -3   0    8.90    9.80
 -15  -3   0   18.90   13.80
  15  -3   0    8.60    8.70
  15   3   0   24.30   24.90
 -15   3   0   12.50    7.70
 -15   3   0    5.50    8.70
  15   3   0    5.00    8.20
  15   3   0   33.90   12.70
 -15   3   0   31.40   15.60
  15   3   0   14.50   21.40
 -15   3   0   16.80   11.50
  15   3   0    4.50    8.40
  15   3   0   15.20   11.70
 -16  -3   0   42.60   14.10
 -16  -3   0   10.40    9.90
  16  -3   0   -1.00   21.50
  16  -3   0   12.80    9.40
  16  -3   0   28.00   11.30
  16  -3   0   30.50   10.90
  16  -3   0  -15.20   20.20
 -16  -3   0   35.30   15.70
 -16  -3   0   11.80   12.70
 -16   3   0   52.59   15.40
 -16   3   0   20.40    9.10
 -16   3   0  -11.60   10.40
 -16   3   0    7.80    7.00
  16   3   0   12.80   10.30
  16   3   0  -17.40   21.50
  16   3   0   19.80   22.50
  16   3   0   15.70    9.90
  16   3   0   28.80   10.70
  16   3   0   -5.80    9.10
   0  -4   0    7.90    4.30
   0  -4   0   10.10    3.70
   0  -4   0   10.00    2.00
   0  -4   0   12.60    3.50
   0  -4   0   12.90    3.20
   0  -4   0   11.30    2.60
   0   4   0   11.00    2.50
   0   4   0   12.10    3.20
   0   4   0    5.60    1.90
   0   4   0   10.50    2.80
   0   4   0    9.10    4.10
   0   4   0   13.90    3.90
  -1  -4   0   13.00    2.00
   1  -4   0   14.50    2.90
   1  -4   0   12.20    4.50
  -1  -4   0   15.60    6.10
  -1  -4   0   13.70    3.60
  -1  -4   0   13.00    3.50
   1  -4   0   12.00    2.80
  -1  -4   0    9.50    3.40
   1  -4   0   11.70    3.90
   1  -4   0   15.10    3.60
  -1   4   0    9.70    4.00
  -1   4   0   12.10    3.80
  -1   4   0   16.40    3.50
   1   4   0   13.00    4.50
   1   4   0   13.90    2.90
   1   4   0   16.90    3.70
   1   4   0   12.60    2.50
  -1   4   0   13.40    3.40
   1   4   0   10.30    2.60
   2  -4   0  135.79    6.60
  -2  -4   0  135.39   13.20
   2  -4   0  114.69    8.10
  -2  -4   0  130.99    8.00
  -2  -4   0  131.29    9.60
  -2  -4   0  116.09    7.80
  -2  -4   0  126.29    7.20
   2  -4   0  134.09    8.00
   2  -4   0  129.19    7.40
  -2  -4   0  134.29    7.50
   2  -4   0  123.29   10.80
   2  -4   0  138.29    8.40
  -2   4   0  111.19    7.80
  -2   4   0  133.39   10.30
  -2   4   0  132.69    6.50
   2   4   0  126.89    7.40
   2   4   0  135.29    7.60
  -2   4   0  139.49    9.30
   2   4   0  146.09   14.00
   2   4   0  135.69    9.60
   2   4   0  137.49    6.90
  -2   4   0  128.89    7.40
   2   4   0  122.19    7.40
  -2   4   0  139.29    7.60
   3  -4   0   92.89   11.00
  -3  -4   0  113.59   14.40
  -3  -4   0  104.19    7.20
   3  -4   0   89.89    6.80
  -3  -4   0   86.29    7.30
   3  -4   0   90.39    6.20
   3  -4   0   92.89    7.50
  -3  -4   0   96.79    9.30
  -3  -4   0  103.49    6.50
   3  -4   0  108.39    8.40
   3  -4   0  109.59    7.80
  -3   4   0   81.49    9.90
   3   4   0  102.09    7.80
  -3   4   0  101.99    7.80
   3   4   0   98.29    6.60
   3   4   0   91.19    7.60
  -3   4   0  103.09    7.70
   3   4   0  100.59   11.50
   3   4   0  109.69    6.80
  -4  -4   0  788.72   31.40
   4  -4   0  768.62   32.20
   4  -4   0  754.62   25.90
   4  -4   0  768.92   27.70
  -4  -4   0  743.53   31.90
   4  -4   0  783.82   28.20
  -4  -4   0  722.63   29.20
  -4  -4   0  739.93   27.40
   4  -4   0  751.32   27.30
   4  -4   0  701.63   27.10
  -4  -4   0  711.13   25.50
  -4   4   0  719.73   31.50
  -4   4   0  757.42   31.90
   4   4   0  734.83   27.40
   4   4   0  717.73   25.60
  -4   4   0  789.52   28.10
   4   4   0  734.23   32.90
  -4   4   0  759.42   27.20
  -4   4   0  867.11   31.50
   4   4   0  720.33   27.00
   4   4   0  718.73   32.10
  -5  -4   0   32.50    9.20
   5  -4   0   25.60   11.40
  -5  -4   0   27.20    5.50
   5  -4   0   36.90    8.70
   5  -4   0   30.80    5.40
   5  -4   0   29.80    6.90
  -5  -4   0   29.60    5.30
  -5  -4   0   36.80    8.20
  -5  -4   0   36.90    5.90
   5  -4   0   28.90    5.00
   5   4   0   27.70    6.10
   5   4   0   29.60   10.50
  -5   4   0   31.20    6.50
  -5   4   0   29.50    5.20
  -5   4   0   28.70    5.10
  -5   4   0   32.80    4.30
   5   4   0   24.40    5.30
   5   4   0   46.50    9.30
   5   4   0   26.60    3.80
   5   4   0   16.00   10.50
  -5   4   0   30.50    8.00
  -6  -4   0  487.25   26.00
  -6  -4   0  455.45   19.00
   6  -4   0  420.46   20.00
   6  -4   0  446.16   19.30
  -6  -4   0  456.35   21.70
   6  -4   0  484.15   21.50
   6  -4   0  437.86   21.10
  -6  -4   0  493.05   26.50
   6  -4   0  459.35   25.90
   6  -4   0  451.65   21.20
  -6  -4   0  453.25   20.50
  -6   4   0  448.36   20.70
   6   4   0  465.35   19.80
   6   4   0  477.65   20.80
   6   4   0  458.95   18.50
  -6   4   0  454.75   21.00
   6   4   0  437.96   24.70
  -6   4   0  490.25   27.60
  -6   4   0  460.75   18.90
   6   4   0  469.75   21.10
   6   4   0  448.76   27.00
  -6   4   0  460.55   21.00
   7  -4   0  187.48   14.70
  -7  -4   0  180.48   18.60
   7  -4   0  186.98   12.30
   7  -4   0  179.28   13.90
   7  -4   0  196.08   13.80
   7  -4   0  182.28   20.60
  -7  -4   0  211.88   19.10
  -7  -4   0  171.68   13.00
  -7  -4   0  158.78   11.50
  -7  -4   0  183.88   13.40
  -7   4   0  187.38   13.50
   7   4   0  162.18   17.00
   7   4   0  218.68   15.80
  -7   4   0  172.38   11.40
   7   4   0  181.78   11.50
   7   4   0  195.28   13.60
   7   4   0  151.88   17.10
  -7   4   0  175.58   12.30
  -7   4   0  178.18   17.30
  -7   4   0  197.18   13.60
   7   4   0  180.48   10.70
   8  -4   0   88.79   10.10
   8  -4   0   92.79   16.10
  -8  -4   0  113.89   14.90
  -8  -4   0  120.69   12.20
   8  -4   0  102.49   13.10
  -8  -4   0  103.69   11.70
   8  -4   0  104.19   12.20
  -8  -4   0  124.69   17.70
   8  -4   0  109.39   11.40
  -8  -4   0   96.49    9.80
   8  -4   0  108.09   10.50
   8   4   0   99.39   16.30
   8   4   0  108.89   11.70
   8   4   0   88.69    8.80
  -8   4   0  102.49   11.30
   8   4   0  117.39   11.00
  -8   4   0   88.39    9.90
   8   4   0   96.09   16.30
  -8   4   0  117.59   10.00
  -8   4   0   88.89   14.30
  -8   4   0   91.89    9.70
   8   4   0   89.69    9.80
   9  -4   0  142.49   15.30
  -9  -4   0  166.98   14.80
   9  -4   0  158.28   13.30
  -9  -4   0  165.68   21.50
  -9  -4   0  169.48   12.80
  -9  -4   0  167.48   17.60
  -9  -4   0  156.18   14.70
   9  -4   0  156.98   12.90
   9  -4   0  154.38   13.30
   9  -4   0  161.18   13.90
   9  -4   0  154.38   24.40
  -9   4   0  140.39   12.50
  -9   4   0  156.38   11.30
   9   4   0  157.88   20.60
  -9   4   0  154.58   21.30
   9   4   0  136.99   11.70
   9   4   0  174.98   11.80
  -9   4   0  181.18   18.20
   9   4   0  160.08   14.30
  -9   4   0  173.78   14.60
   9   4   0  169.38   25.70
   9   4   0  149.59   14.90
 -10  -4   0   70.49    9.40
  10  -4   0   64.39    9.50
  10  -4   0   70.99   11.00
 -10  -4   0   76.49   12.40
  10  -4   0   65.89   10.60
 -10  -4   0   86.59   12.20
 -10  -4   0   92.29   18.70
  10  -4   0   81.79   12.60
  10  -4   0   79.39   13.50
  10  -4   0   94.09   22.40
 -10  -4   0   89.19   16.10
 -10   4   0   92.59   13.20
  10   4   0   61.19   10.30
 -10   4   0   63.19   18.20
  10   4   0   77.69   19.30
  10   4   0   87.29   11.70
  10   4   0   61.59   17.90
  10   4   0   66.39    8.90
 -10   4   0   72.79   11.00
 -10   4   0   78.19   10.10
 -10   4   0  111.59   13.90
  10   4   0   79.09   11.50
  11  -4   0   19.90    8.10
 -11  -4   0   12.20    9.00
  11  -4   0    3.30    7.00
 -11  -4   0   19.40   12.00
  11  -4   0   31.40    9.10
  11  -4   0   28.00   22.30
  11  -4   0    7.80   11.20
 -11  -4   0   36.40   13.90
 -11  -4   0   21.80    9.90
 -11  -4   0   14.30   12.60
  11  -4   0    8.70   10.20
 -11   4   0    7.00   10.20
  11   4   0   36.40   18.20
 -11   4   0    5.90    5.80
 -11   4   0   18.20    6.70
  11   4   0   23.30   19.50
  11   4   0    7.50    7.30
 -11   4   0   10.20    8.70
  11   4   0   22.80    8.90
  11   4   0   16.80    7.20
  11   4   0   33.70   10.10
 -11   4   0   17.70    7.60
 -12  -4   0   95.69   14.20
  12  -4   0  113.09   16.00
  12  -4   0   78.59   14.20
  12  -4   0   84.69   21.70
  12  -4   0   97.19   15.50
  12  -4   0   64.79   11.40
  12  -4   0   76.89   11.10
 -12  -4   0   88.49   20.10
 -12  -4   0   56.89   12.40
 -12  -4   0   85.89   12.10
 -12  -4   0   79.29   18.80
 -12   4   0   61.49    9.20
  12   4   0   73.79   12.90
  12   4   0   59.09    9.60
  12   4   0   88.99   18.00
 -12   4   0   87.19   12.90
 -12   4   0   89.99   13.30
  12   4   0   64.29   12.30
 -12   4   0   62.09   12.40
  12   4   0   45.30    9.40
 -12   4   0   71.79   19.50
  12   4   0   70.09   21.10
 -13  -4   0    2.20   14.90
 -13  -4   0    6.30    6.50
  13  -4   0    8.00    6.80
 -13  -4   0   -5.30    5.30
  13  -4   0   -5.40    7.90
 -13  -4   0    4.90   12.40
  13  -4   0    5.40   16.20
  13  -4   0   -9.30    9.10
 -13  -4   0   -0.20    7.10
  13  -4   0   -5.40    7.90
 -13   4   0    2.20    9.10
 -13   4   0    2.40   10.10
  13   4   0   -4.80   21.00
  13   4   0   10.70    6.70
  13   4   0   13.00   22.00
  13   4   0   -4.60    6.80
 -13   4   0    3.70    5.90
 -13   4   0   -6.00    8.30
  13   4   0   11.90   10.10
 -13   4   0    3.10    6.00
  13   4   0    9.10    7.10
  14  -4   0   62.39   12.20
 -14  -4   0   93.89   19.40
  14  -4   0   58.59   12.40
 -14  -4   0   56.09   20.00
  14  -4   0   62.19   11.50
  14  -4   0   58.99   12.80
 -14  -4   0   55.29   13.10
 -14  -4   0   54.49   10.00
  14  -4   0   72.99   23.60
 -14  -4   0   72.99   14.40
  14   4   0   96.99   16.50
  14   4   0   60.29   11.20
  14   4   0   82.09   23.60
 -14   4   0   88.39   15.70
  14   4   0   37.50   11.50
  14   4   0   76.79   12.40
 -14   4   0   55.49   18.70
 -14   4   0   53.79   10.80
 -14   4   0   53.99   12.20
 -14   4   0   81.69   11.40
  14   4   0   74.99   22.50
  15  -4   0   47.30   11.90
 -15  -4   0   43.20   20.00
 -15  -4   0   14.20    9.90
  15  -4   0   29.20   20.20
  15  -4   0   33.50   21.50
 -15  -4   0   17.40    8.70
  15  -4   0   29.20   12.60
  15   4   0   19.50    9.30
 -15   4   0   31.20   10.30
  15   4   0   32.60   26.60
  15   4   0   54.39   22.90
 -15   4   0   18.90    7.70
 -15   4   0   46.30   14.90
 -15   4   0   25.60    9.20
 -15   4   0   29.20   10.80
  15   4   0   17.20    9.00
  16  -4   0   11.20    9.90
 -16  -4   0    9.10    6.70
 -16  -4   0   29.80   16.70
  16  -4   0    3.90   10.80
  16  -4   0  -42.20   29.10
  16  -4   0   -4.10   11.70
 -16  -4   0   12.00   18.10
  16   4   0    1.30    8.90
 -16   4   0   12.10   11.90
  16   4   0    6.60    8.50
  16   4   0   26.30   21.00
 -16   4   0   42.70   14.30
  16   4   0    3.10    7.20
 -16   4   0   22.10   10.80
  16   4   0   32.60   11.60
 -16   4   0   21.00   10.70
  16   4   0   38.20   23.10
   0  -5   0   -0.70    3.00
   0  -5   0   -0.90    1.90
   0  -5   0   -1.30    2.20
   0  -5   0   -0.40    3.10
   0  -5   0   -2.50    4.30
   0  -5   0    2.40    3.50
   0   5   0   -0.10    1.80
   0   5   0    1.20    5.00
   0   5   0   -0.60    3.20
   0   5   0   -3.80    2.80
   0   5   0    2.90    6.60
   0   5   0   -4.00    2.10
   1  -5   0 2722.83   84.09
   1  -5   0 2773.62   82.39
   1  -5   0 2682.33   81.79
  -1  -5   0 2816.52   80.29
   1  -5   0 2745.33   81.89
   1  -5   0 2719.83   82.79
  -1  -5   0 2654.53   81.89
  -1  -5   0 2673.83   83.69
  -1  -5   0 2744.03   81.99
  -1  -5   0 2743.13   81.89
  -1  -5   0 2516.95   83.99
  -1   5   0 2968.90   82.79
  -1   5   0 2700.63   82.79
   1   5   0 2780.42   80.19
   1   5   0 2822.92   82.19
   1   5   0 2774.22   85.09
  -1   5   0 2775.22   81.99
   1   5   0 2716.33   81.89
  -1   5   0 2651.43   84.39
   1   5   0 2674.13   81.59
  -2  -5   0  105.09    7.70
  -2  -5   0   82.49    8.70
  -2  -5   0  104.99   15.10
   2  -5   0   97.79    8.30
  -2  -5   0   85.49    6.90
  -2  -5   0   88.19    7.20
   2  -5   0   84.09    7.90
  -2  -5   0  100.59    6.20
   2  -5   0   89.19    7.20
   2  -5   0   88.29    8.70
  -2   5   0   88.59    6.60
  -2   5   0   83.19    9.20
  -2   5   0   77.19   11.50
  -2   5   0   97.89    8.50
  -2   5   0   92.49    5.60
   2   5   0   92.89    7.50
   2   5   0   97.89    6.70
  -2   5   0   85.29    6.50
   2   5   0   73.49   21.10
   2   5   0   97.79    7.60
   2   5   0   95.39    6.00
  -3  -5   0  288.17   17.70
   3  -5   0  272.97   11.70
   3  -5   0  304.57   15.90
   3  -5   0  277.97   13.60
   3  -5   0  300.07   13.90
  -3  -5   0  274.57   15.20
  -3  -5   0  282.97   13.40
   3  -5   0  300.07   19.40
   3  -5   0  293.67   13.80
  -3  -5   0  302.97   12.60
  -3  -5   0  293.17   13.80
  -3   5   0  307.17   14.20
   3   5   0  273.07   12.60
  -3   5   0  281.37   14.40
   3   5   0  269.87   18.30
  -3   5   0  287.17   16.50
   3   5   0  284.97   13.80
   3   5   0  263.47   13.00
  -3   5   0  274.17   13.60
   3   5   0  317.57   12.60
  -3   5   0  281.87   12.10
   4  -5   0   15.60    4.40
  -4  -5   0   27.70    7.80
  -4  -5   0   28.60    4.80
   4  -5   0   19.90    4.80
   4  -5   0   32.20    4.70
   4  -5   0   19.40    7.80
  -4  -5   0   19.90    5.60
  -4  -5   0   29.90    8.80
   4  -5   0   21.20    6.70
   4  -5   0   24.20    5.50
  -4  -5   0   22.70    5.40
   4   5   0   24.80    5.60
   4   5   0   34.60   11.60
   4   5   0   26.20    5.50
  -4   5   0   27.40    5.70
  -4   5   0   22.10    8.10
  -4   5   0   21.20    5.40
   4   5   0   27.50    4.20
   4   5   0   22.60    6.30
   4   5   0   18.20   10.60
  -4   5   0   22.80    5.50
  -4   5   0   33.00    5.30
  -5  -5   0  476.85   19.50
   5  -5   0  431.36   23.00
   5  -5   0  525.05   22.90
  -5  -5   0  514.25   21.90
   5  -5   0  524.85   20.20
   5  -5   0  530.85   27.10
  -5  -5   0  540.65   25.30
   5  -5   0  521.65   25.40
  -5  -5   0  490.05   21.20
   5  -5   0  523.35   22.20
  -5  -5   0  544.75   27.20
   5   5   0  473.75   25.10
  -5   5   0  520.05   26.60
   5   5   0  526.95   21.70
   5   5   0  509.25   21.80
  -5   5   0  491.35   19.20
  -5   5   0  521.45   22.40
   5   5   0  487.65   28.00
   5   5   0  485.75   19.30
   5   5   0  523.65   20.40
  -5   5   0  486.55   23.80
  -5   5   0  510.25   21.40
  -6  -5   0    2.60    2.80
  -6  -5   0    2.60    8.90
   6  -5   0    1.50    2.70
   6  -5   0    0.70    5.00
   6  -5   0    1.60    4.20
   6  -5   0   -0.90    4.40
  -6  -5   0   -0.60    3.50
  -6  -5   0   -6.60    4.90
   6  -5   0    1.20    7.30
  -6  -5   0   -6.70    7.90
   6  -5   0   -4.40    9.40
  -6   5   0    4.40    5.10
  -6   5   0    0.00    2.70
  -6   5   0   -1.80    4.10
   6   5   0    2.70    9.40
   6   5   0    0.40    4.90
   6   5   0   -3.30    3.20
  -6   5   0    2.90    5.10
   6   5   0    0.50    3.60
   6   5   0    3.30    8.10
  -6   5   0   -7.20    5.30
   6   5   0    2.30    3.00
  -7  -5   0  157.68   12.90
   7  -5   0  146.19   10.30
   7  -5   0  143.99   12.30
  -7  -5   0  144.69   11.20
  -7  -5   0  137.59   15.00
   7  -5   0  150.58   14.40
  -7  -5   0  173.88   11.60
   7  -5   0  172.58   16.10
  -7  -5   0  176.68   18.60
   7  -5   0  155.88   13.20
   7  -5   0  161.38   19.80
  -7   5   0  137.59   11.10
   7   5   0  157.28   19.30
   7   5   0  140.29   21.60
   7   5   0  145.99   10.60
  -7   5   0  134.59   11.30
  -7   5   0  140.69    9.70
   7   5   0  138.49    9.60
  -7   5   0  133.59   15.90
  -7   5   0  138.39   11.40
   7   5   0  145.69   11.40
   7   5   0  118.49   12.00
   8  -5   0   84.19   16.00
  -8  -5   0   87.09   16.10
  -8  -5   0   74.39   11.20
   8  -5   0   79.09   10.70
   8  -5   0   66.09   10.20
   8  -5   0   71.49   10.70
  -8  -5   0   80.89    9.80
  -8  -5   0   65.89    7.80
   8  -5   0   84.59    9.60
   8  -5   0   83.89   11.20
  -8  -5   0   75.09   14.20
  -8   5   0   89.99   11.30
   8   5   0   94.89   18.00
   8   5   0   72.39    7.10
   8   5   0   84.19    9.90
   8   5   0   80.79   15.20
  -8   5   0   90.09   10.50
  -8   5   0   78.99   16.20
   8   5   0   76.69   10.60
  -8   5   0   81.69    9.70
  -8   5   0   74.69    7.80
   8   5   0   77.89   11.30
   9  -5   0   64.69   10.20
   9  -5   0   66.39   10.10
  -9  -5   0   89.39   18.00
  -9  -5   0   67.49   14.20
   9  -5   0   69.09   10.60
   9  -5   0   54.59    9.10
  -9  -5   0   61.59   10.70
  -9  -5   0   65.89   11.00
   9  -5   0   66.39   12.90
   9  -5   0   68.39   19.90
  -9  -5   0   51.79    7.60
   9   5   0   69.29   10.90
  -9   5   0   65.59    9.90
   9   5   0   61.29   15.60
  -9   5   0   54.49   16.20
   9   5   0   67.79    9.00
  -9   5   0   66.89    9.20
   9   5   0   81.59   19.30
  -9   5   0   53.39    8.80
  -9   5   0   77.59   10.50
   9   5   0   78.79   11.90
   9   5   0   67.59    8.30
 -10  -5   0  113.49   12.10
  10  -5   0   99.39   14.30
 -10  -5   0  127.89   19.90
  10  -5   0  119.79   20.90
  10  -5   0   96.29   15.10
  10  -5   0  113.89   13.60
 -10  -5   0  100.59   16.80
 -10  -5   0   91.39   13.60
  10  -5   0   94.09   11.20
  10  -5   0  121.49   12.90
 -10  -5   0  113.79   12.10
  10   5   0  115.49   20.40
  10   5   0  126.69   15.20
  10   5   0   93.19   17.60
  10   5   0   81.39   11.50
 -10   5   0  109.79   13.90
  10   5   0  108.19   10.40
  10   5   0  113.89   12.90
 -10   5   0  123.29   12.10
 -10   5   0  115.39   13.30
 -10   5   0  102.09   18.40
 -10   5   0  111.99   13.40
 -11  -5   0   85.79   20.20
  11  -5   0   84.79   13.40
  11  -5   0   83.99   20.00
 -11  -5   0   70.49   13.40
  11  -5   0   79.99   12.30
 -11  -5   0   74.09   11.10
  11  -5   0   60.49   11.40
 -11  -5   0   82.79   12.70
 -11  -5   0  139.49   21.90
  11  -5   0   85.29   11.60
  11  -5   0  102.09   12.80
 -11   5   0   77.39   17.10
  11   5   0   55.69   10.60
  11   5   0   77.59   22.00
 -11   5   0   72.39   12.10
 -11   5   0   71.49   12.80
  11   5   0   86.69   12.40
  11   5   0   83.99   10.10
  11   5   0   68.49   18.80
  11   5   0   57.09   10.80
 -11   5   0   87.39   13.70
 -11   5   0   88.49   11.30
  12  -5   0    4.70    7.20
  12  -5   0   11.50   10.00
 -12  -5   0   25.40    9.60
  12  -5   0   19.80   11.60
 -12  -5   0   15.60   14.40
  12  -5   0    6.90    7.80
  12  -5   0    7.00    6.50
 -12  -5   0   -2.90    8.00
 -12  -5   0   26.70   15.60
 -12  -5   0    7.20    5.60
  12  -5   0    9.30   14.90
  12   5   0    8.50    6.60
 -12   5   0   11.10    6.30
  12   5   0    4.80   13.60
 -12   5   0    6.60    6.10
  12   5   0   36.00   20.80
 -12   5   0    4.00   13.00
 -12   5   0    2.60    6.00
  12   5   0    9.00    8.70
 -12   5   0    3.70    8.50
  12   5   0    7.60    6.30
  12   5   0    4.20    7.70
 -13  -5   0   33.90   11.10
  13  -5   0   37.50    9.00
 -13  -5   0   47.50   18.60
 -13  -5   0   46.60   14.60
  13  -5   0   40.30   10.90
  13  -5   0   28.30   10.20
 -13  -5   0   37.10   11.40
  13  -5   0   37.30   24.40
  13  -5   0   26.60    8.40
 -13  -5   0   53.69   10.90
 -13   5   0   40.00   11.70
 -13   5   0   42.40   10.40
  13   5   0   61.29   11.00
  13   5   0   42.50    9.00
  13   5   0   69.89   23.40
  13   5   0   28.60    9.30
  13   5   0   43.80   23.20
 -13   5   0   41.80   10.70
 -13   5   0   42.80   11.80
  13   5   0   54.19   11.50
 -13   5   0   44.70   15.20
 -14  -5   0    2.50    6.80
  14  -5   0    7.20    7.20
 -14  -5   0   -3.80    9.80
 -14  -5   0    6.20    7.30
 -14  -5   0    7.90    8.30
  14  -5   0    0.60   11.70
  14  -5   0   -8.00    8.10
  14  -5   0   -3.20   24.40
  14  -5   0   -6.90    8.60
 -14   5   0   26.20   14.40
 -14   5   0    6.70    7.00
  14   5   0    1.90    5.60
  14   5   0   -1.70   19.50
 -14   5   0    7.40    7.80
  14   5   0    3.70   15.50
  14   5   0   -2.80    6.70
  14   5   0    4.80    8.90
 -14   5   0    7.60    8.20
 -14   5   0   16.30    7.80
  14   5   0    2.70    6.40
  15  -5   0   28.50    9.60
  15  -5   0   28.60   28.10
 -15  -5   0   16.30   11.70
  15  -5   0    9.70    8.70
  15  -5   0   23.30   11.70
 -15  -5   0   14.20   13.50
  15  -5   0   25.80   12.70
 -15  -5   0   11.10   11.10
 -15  -5   0   28.00   10.10
  15   5   0   11.70    7.60
  15   5   0   22.70   25.00
 -15   5   0   19.50   10.30
 -15   5   0   18.40   10.40
 -15   5   0   11.60   12.00
  15   5   0   51.99   24.10
 -15   5   0   31.70   13.40
  15   5   0   43.20   12.80
 -15   5   0   21.60    9.10
  15   5   0   12.60    8.70
 -16  -5   0   32.90   16.30
  16  -5   0   15.00    9.90
  16  -5   0   18.80   13.10
 -16  -5   0   23.60    9.10
 -16  -5   0    9.90   12.20
  16  -5   0  -30.00   27.30
  16   5   0   -0.30    8.90
  16   5   0   19.70   14.70
 -16   5   0   30.30   13.80
 -16   5   0    9.20    8.60
  16   5   0   13.70   33.10
  16   5   0   41.40   25.00
 -16   5   0   23.90   12.10
 -16   5   0    7.30   10.10
  16   5   0   13.70    7.70
  16   5   0   14.40   10.90
   0  -6   0  126.09    6.40
   0  -6   0  121.69    8.50
   0  -6   0  128.29    7.80
   0  -6   0  107.29   10.60
   0  -6   0  110.09   13.70
   0  -6   0  114.69    8.90
   0   6   0  124.29    8.40
   0   6   0  136.09   10.50
   0   6   0  114.99    9.30
   0   6   0  120.79    7.60
   0   6   0  121.69    6.30
   0   6   0  115.59   13.00
  -1  -6   0   14.30    6.80
  -1  -6   0   12.70    4.40
  -1  -6   0   14.50    4.20
   1  -6   0   17.90    4.40
  -1  -6   0   15.00    3.60
   1  -6   0   18.70    5.50
   1  -6   0    9.00    4.40
   1  -6   0   23.80    7.50
  -1  -6   0   25.30    4.30
   1  -6   0   20.40    7.00
   1   6   0   15.40    4.70
  -1   6   0    5.00    7.00
   1   6   0   16.60    6.00
  -1   6   0   10.50   10.70
   1   6   0   17.00    3.00
  -1   6   0   11.50    3.50
  -1   6   0   18.60    5.40
   1   6   0   18.40    5.00
  -1   6   0   14.60    3.70
   2  -6   0  692.43   25.80
   2  -6   0  670.13   24.80
  -2  -6   0  651.73   24.70
   2  -6   0  680.53   27.50
   2  -6   0  695.33   24.90
  -2  -6   0  661.23   24.60
   2  -6   0  672.93   25.70
  -2  -6   0  651.53   30.30
  -2  -6   0  665.53   23.00
  -2  -6   0  670.93   26.50
  -2  -6   0  644.34   24.20
   2   6   0  677.23   30.80
   2   6   0  651.13   26.30
   2   6   0  716.13   23.10
   2   6   0  699.33   25.10
  -2   6   0  662.73   23.10
  -2   6   0  725.13   25.70
  -2   6   0  652.73   27.70
   2   6   0  676.03   24.70
  -2   6   0  688.03   25.30
  -2   6   0  670.03   24.90
  -2   6   0  655.23   28.50
  -3  -6   0    4.70    2.60
   3  -6   0    8.40    4.90
   3  -6   0    6.70    6.50
   3  -6   0    4.10    5.50
  -3  -6   0    7.90    6.80
   3  -6   0    4.30    2.80
  -3  -6   0   -0.20    4.60
  -3  -6   0   -1.60    6.70
  -3  -6   0   -1.30    6.30
  -3  -6   0    5.80    3.80
   3  -6   0   -1.10    3.90
   3  -6   0    5.90    4.50
  -3   6   0    1.80    3.20
  -3   6   0    6.70    6.60
   3   6   0    0.40    2.40
  -3   6   0   -5.20    5.50
   3   6   0    3.70    8.10
   3   6   0    2.00    4.60
  -3   6   0    4.00    2.80
   3   6   0    2.50    4.60
   3   6   0   10.90    5.20
  -3   6   0   -0.60    4.10
   4  -6   0  171.18   11.10
   4  -6   0  165.88    9.40
   4  -6   0  164.28   13.40
  -4  -6   0  166.58   13.00
  -4  -6   0  175.98    9.40
   4  -6   0  182.88   14.10
   4  -6   0  176.08   10.90
  -4  -6   0  177.98   11.30
   4  -6   0  176.28   14.90
  -4  -6   0  182.38   11.70
  -4  -6   0  174.88   17.90
  -4   6   0  163.88   14.50
   4   6   0  166.38   11.40
   4   6   0  152.68   16.10
   4   6   0  179.08   12.70
  -4   6   0  181.18   11.40
   4   6   0  165.58   10.00
  -4   6   0  155.58    8.70
   4   6   0  154.68   11.20
  -4   6   0  163.98   12.80
  -4   6   0  172.98   10.60
   5  -6   0    2.90    4.70
  -5  -6   0   12.90    7.30
   5  -6   0    6.00    8.70
   5  -6   0   13.50    4.40
  -5  -6   0   12.20    6.50
   5  -6   0    7.30    5.80
  -5  -6   0    9.80    5.60
   5  -6   0   11.20    5.80
  -5  -6   0   10.80    6.60
   5  -6   0    9.60    4.60
   5  -6   0   12.00    3.40
  -5  -6   0    9.00    3.70
  -5   6   0    5.90    5.20
   5   6   0   10.00    4.70
   5   6   0    6.90    4.20
  -5   6   0    9.60    3.40
   5   6   0   14.00    8.80
   5   6   0   21.20    5.10
  -5   6   0   13.00    4.50
  -5   6   0    2.20    5.50
   5   6   0   13.90    4.30
   5   6   0    5.20    8.70
  -5   6   0   14.10    4.50
   6  -6   0  108.89   16.30
   6  -6   0  109.99   11.10
   6  -6   0   97.99    7.80
   6  -6   0   99.29   10.50
   6  -6   0   96.49   10.80
  -6  -6   0  118.89   13.00
  -6  -6   0  114.59   17.20
  -6  -6   0  113.79   10.80
  -6  -6   0   98.69    8.10
   6  -6   0   99.19   13.00
  -6  -6   0  115.79    9.70
   6   6   0   98.99   14.90
   6   6   0  107.79    9.50
   6   6   0   89.49   10.00
   6   6   0  107.09    8.10
  -6   6   0   98.09    9.30
  -6   6   0  112.89    8.60
  -6   6   0   89.99   12.70
   6   6   0  112.49   10.80
   6   6   0  116.79   17.40
   6   6   0  119.49   12.60
  -6   6   0   98.79    9.20
  -6   6   0   95.09   11.50
   7  -6   0  171.98   15.60
  -7  -6   0  177.78   11.60
  -7  -6   0  169.58   13.70
   7  -6   0  174.28   12.80
  -7  -6   0  191.48   14.30
   7  -6   0  202.88   13.10
   7  -6   0  192.48   21.00
  -7  -6   0  189.78   19.40
   7  -6   0  203.68   14.20
   7  -6   0  197.38   14.60
  -7  -6   0  194.98   21.00
  -7   6   0  189.48   12.10
  -7   6   0  171.28   14.60
  -7   6   0  183.58   13.80
   7   6   0  178.78   17.90
   7   6   0  229.58   26.90
   7   6   0  204.98   14.60
  -7   6   0  185.08   19.80
   7   6   0  205.08   13.30
  -7   6   0  162.68   12.70
   7   6   0  191.28   19.90
   7   6   0  177.58   11.20
  -8  -6   0  124.29   18.60
   8  -6   0  100.59   11.90
  -8  -6   0  110.29   10.70
  -8  -6   0  103.59   12.30
   8  -6   0  113.59   17.30
   8  -6   0  101.99   13.80
   8  -6   0  101.49   13.00
  -8  -6   0  104.89   16.10
   8  -6   0  106.79   11.20
   8  -6   0  102.49   10.40
   8   6   0  109.29   19.60
   8   6   0   88.19    8.80
   8   6   0  107.49   11.40
  -8   6   0  106.29   15.50
   8   6   0   98.09   16.10
  -8   6   0   91.89   12.80
  -8   6   0  104.09   13.00
  -8   6   0  106.39    8.90
   8   6   0  101.19   12.00
   8   6   0  101.79   11.90
  -8   6   0  104.79   12.30
   9  -6   0   53.29    9.90
   9  -6   0   52.79   11.10
   9  -6   0   59.39    9.40
  -9  -6   0   65.79   10.90
   9  -6   0   67.49   13.50
   9  -6   0   72.09   20.10
  -9  -6   0   64.39   10.00
  -9  -6   0   68.79   15.30
  -9  -6   0   71.69    9.80
  -9  -6   0   60.59   16.60
   9  -6   0   57.49    9.60
  -9   6   0   49.30    9.10
  -9   6   0   59.89   13.90
  -9   6   0   49.40    8.60
   9   6   0   62.19   15.60
   9   6   0   42.20    8.70
  -9   6   0   59.39   10.80
   9   6   0   42.10    7.10
   9   6   0   62.29   19.30
   9   6   0   50.49    8.00
   9   6   0   31.00    7.50
  -9   6   0   57.89   11.10
 -10  -6   0   -0.80    9.70
 -10  -6   0    2.80    6.10
  10  -6   0    1.50    4.10
  10  -6   0    0.20    6.20
 -10  -6   0    0.20    7.70
 -10  -6   0    3.60    7.40
 -10  -6   0    0.20    7.20
  10  -6   0    3.40   12.20
  10  -6   0    2.90    6.60
  10  -6   0    7.90    8.80
  10  -6   0   -5.20    5.20
 -10   6   0   -3.80    8.30
 -10   6   0   -8.60    5.90
 -10   6   0    7.30    7.40
  10   6   0    5.10    5.10
  10   6   0    6.80   16.50
 -10   6   0   -1.10    7.90
 -10   6   0    4.20    7.70
  10   6   0    7.60    7.60
  10   6   0   -5.60   17.60
  10   6   0    2.30    7.60
  10   6   0   13.40    7.80
  11  -6   0  -18.90   18.30
  11  -6   0   -1.10    4.80
  11  -6   0  -12.10    7.20
  11  -6   0    3.40    8.40
  11  -6   0    4.90    7.30
  11  -6   0   -3.30    7.40
 -11  -6   0   -5.50    7.00
 -11  -6   0    5.70    7.60
 -11  -6   0   12.80   14.60
 -11  -6   0   13.30   12.40
 -11  -6   0    5.50    7.70
 -11   6   0    6.50    5.20
  11   6   0    1.00    5.40
 -11   6   0   -1.60    5.50
 -11   6   0   -1.10    5.30
  11   6   0   -0.50    6.50
 -11   6   0    4.40    9.10
  11   6   0    1.20   17.10
 -11   6   0   -2.90    7.70
  11   6   0   -0.80   19.00
  11   6   0    8.40    8.00
  11   6   0   17.60    8.60
 -12  -6   0   15.60    6.70
 -12  -6   0   27.50   16.60
  12  -6   0   12.40    6.00
  12  -6   0   26.20   12.20
 -12  -6   0   29.80    8.60
  12  -6   0   26.40   11.10
  12  -6   0   19.30    7.00
 -12  -6   0   23.70    7.70
  12  -6   0   22.90   12.50
  12  -6   0   21.20   21.50
 -12  -6   0   35.30   14.60
  12   6   0   26.30    8.20
  12   6   0   10.60   26.60
  12   6   0   11.70    7.30
 -12   6   0   21.20    8.60
  12   6   0   23.70    8.20
 -12   6   0    8.40   11.30
  12   6   0   19.00   20.80
 -12   6   0   37.90   10.70
 -12   6   0   23.20   14.80
  12   6   0   13.50    7.20
 -12   6   0   37.30   10.90
 -13  -6   0   -2.50   10.20
  13  -6   0   10.20    8.70
 -13  -6   0   15.40    9.60
  13  -6   0    5.50    8.30
 -13  -6   0   -5.90   13.50
  13  -6   0   -7.00   22.70
 -13  -6   0   11.30    7.70
  13  -6   0   -7.80    9.90
 -13  -6   0    0.80    8.50
  13  -6   0   12.30    7.60
 -13   6   0    0.30    9.00
  13   6   0   -7.10   19.20
  13   6   0   -0.50    6.70
  13   6   0   15.90    9.20
 -13   6   0    8.40    9.10
 -13   6   0   -5.60    8.40
  13   6   0  -12.90    8.70
 -13   6   0    3.00    7.00
 -13   6   0   -2.30    7.60
  13   6   0   -3.30   13.70
  13   6   0   -0.80    6.90
 -14  -6   0   -0.40    8.90
  14  -6   0   19.90    9.20
  14  -6   0   -5.90   20.90
 -14  -6   0   15.40   10.10
 -14  -6   0   43.70   16.40
  14  -6   0   -3.50    8.90
  14  -6   0    9.50   17.40
 -14  -6   0    7.90    8.80
  14  -6   0   18.90   10.00
 -14  -6   0   17.30   16.00
 -14   6   0   22.50    7.50
  14   6   0    1.10    6.50
  14   6   0   10.90    8.00
  14   6   0   15.70   22.50
 -14   6   0   -1.30    6.40
  14   6   0   24.20   11.40
  14   6   0   31.20   11.70
 -14   6   0   18.40   11.70
 -14   6   0   31.10   14.60
  14   6   0  -27.50   21.40
 -15  -6   0   15.60    7.60
 -15  -6   0   14.80    6.90
  15  -6   0   21.60   13.80
  15  -6   0   -2.70    6.60
  15  -6   0   12.00    7.40
 -15  -6   0    9.70   16.50
  15  -6   0   -1.50   10.50
  15  -6   0  -11.80   18.00
 -15  -6   0    2.50   10.30
  15   6   0   13.50   19.90
  15   6   0   -1.30    8.70
 -15   6   0    2.30    6.90
 -15   6   0   -7.70    8.50
 -15   6   0   14.10    9.00
  15   6   0    6.20   16.80
  15   6   0   -0.20    7.80
 -15   6   0   12.10    7.30
   0  -7   0   -3.00    3.70
   0  -7   0   -1.30    3.40
   0  -7   0    2.40    4.90
   0  -7   0   -2.70    3.40
   0  -7   0    4.00    6.30
   0   7   0   -3.40    3.60
   0   7   0    2.80    2.90
   0   7   0   -5.90    8.50
   0   7   0   -4.90    6.40
   0   7   0    1.20    2.40
   0   7   0   -4.10    3.70
   1  -7   0    8.80    3.50
  -1  -7   0   12.20    6.00
  -1  -7   0    4.30    2.80
  -1  -7   0    5.50    4.40
   1  -7   0    6.10    7.70
  -1  -7   0   17.40    4.90
   1  -7   0   13.00    7.70
   1  -7   0   11.00    4.90
   1  -7   0    3.70    3.10
  -1  -7   0    7.30    7.10
  -1  -7   0    8.70    4.30
  -1   7   0   11.70    5.20
   1   7   0    7.20    3.20
   1   7   0    6.50    2.20
  -1   7   0    1.50    4.00
   1   7   0    6.90    6.70
  -1   7   0    6.40    5.00
   1   7   0   12.80    8.10
  -1   7   0    9.00    5.20
  -1   7   0   11.00    5.80
  -1   7   0    9.20    2.60
   1   7   0   10.20    3.90
  -2  -7   0  207.98   12.70
   2  -7   0  224.08   13.50
  -2  -7   0  251.27   12.90
   2  -7   0  266.77   16.20
  -2  -7   0  240.38   17.40
  -2  -7   0  241.38   14.40
  -2  -7   0  233.68   15.10
   2  -7   0  240.08   13.10
   2  -7   0  250.97   12.60
  -2  -7   0  223.58   13.10
   2   7   0  270.77   11.30
   2   7   0  226.88   17.30
  -2   7   0  235.38   11.20
   2   7   0  252.17   13.50
   2   7   0  246.88   17.00
  -2   7   0  252.37   13.50
  -2   7   0  229.68   12.30
  -2   7   0  247.68   13.60
   2   7   0  255.47   13.30
  -2   7   0  228.48   14.70
  -2   7   0  241.08   15.60
  -3  -7   0  107.19    8.80
  -3  -7   0  115.09    9.00
   3  -7   0  119.49   10.80
   3  -7   0  109.79   11.30
  -3  -7   0  123.69   13.50
  -3  -7   0  115.69   11.70
  -3  -7   0  122.49    9.00
   3  -7   0  110.99   10.90
   3  -7   0  127.89   12.40
  -3  -7   0  121.79    8.30
  -3   7   0  109.39    7.10
   3   7   0  128.39   10.30
  -3   7   0  121.09   10.10
   3   7   0  117.49    8.50
  -3   7   0  142.49   12.00
   3   7   0  125.79    7.60
  -3   7   0  125.69   10.30
  -3   7   0  129.19   10.40
   3   7   0  120.09   10.10
   3   7   0  113.89   15.50
  -3   7   0  122.09    9.10
  -4  -7   0   -4.20    4.50
   4  -7   0   -0.80    4.60
   4  -7   0   -4.10    5.40
  -4  -7   0   -1.40    4.70
  -4  -7   0   -1.10    2.70
   4  -7   0   -1.30    2.30
   4  -7   0    2.50    5.00
   4  -7   0   -3.50    4.70
   4  -7   0   -1.60    6.40
  -4  -7   0   -4.30    6.80
  -4  -7   0   -0.60    7.20
   4   7   0   -1.50    6.50
   4   7   0    0.50    3.50
  -4   7   0   -1.60    3.10
   4   7   0   -5.90    4.40
   4   7   0   -3.90    3.40
   4   7   0    2.00    7.70
   4   7   0    0.90    4.10
  -4   7   0   -1.60    5.70
  -4   7   0    5.90    7.20
  -4   7   0   -4.10    4.80
  -5  -7   0  236.68   17.90
  -5  -7   0  224.58   14.30
   5  -7   0  221.18   13.50
   5  -7   0  231.58   16.80
   5  -7   0  216.78   13.30
   5  -7   0  231.48   13.70
  -5  -7   0  213.88   18.40
  -5  -7   0  244.38   14.70
   5  -7   0  223.28   18.80
   5  -7   0  230.78   12.20
  -5  -7   0  212.18   11.60
   5   7   0  210.38   23.70
   5   7   0  242.98   14.70
  -5   7   0  223.88   14.10
   5   7   0  233.88   12.60
  -5   7   0  232.38   14.40
   5   7   0  205.48   16.00
  -5   7   0  205.28   17.30
  -5   7   0  211.18   13.20
  -5   7   0  218.08   11.70
   5   7   0  213.08   17.40
  -6  -7   0   64.19    7.70
   6  -7   0   73.79   14.50
  -6  -7   0   61.19    9.30
  -6  -7   0   60.39   12.80
   6  -7   0   55.69    6.60
   6  -7   0   52.29    8.80
   6  -7   0   64.49    9.80
  -6  -7   0   70.29    9.80
   6  -7   0   77.69   13.20
   6  -7   0   61.69    8.40
  -6  -7   0   63.49   12.90
  -6   7   0   80.99   10.00
  -6   7   0   60.89    9.80
  -6   7   0   65.99   12.10
  -6   7   0   62.89    7.20
   6   7   0   74.19    8.60
   6   7   0   52.59   12.60
   6   7   0   54.79    7.60
   6   7   0   60.29    9.40
  -6   7   0   68.29    8.90
   6   7   0   75.79    9.70
   6   7   0   63.69   11.60
   7  -7   0   56.09   12.20
   7  -7   0   63.89   10.00
   7  -7   0   60.19   10.00
   7  -7   0   75.09   15.90
  -7  -7   0   61.69    9.50
  -7  -7   0   55.99   13.60
  -7  -7   0   63.19   14.30
   7  -7   0   58.39    9.10
   7  -7   0   54.29    7.10
   7  -7   0   56.49    8.50
  -7  -7   0   53.29    7.20
  -7  -7   0   67.39    9.10
  -7   7   0   46.10   10.00
   7   7   0   51.99    8.20
   7   7   0   54.59    6.90
  -7   7   0   52.99    7.50
   7   7   0   53.79    9.90
   7   7   0   58.39    7.80
   7   7   0   49.50   16.40
  -7   7   0   69.49    9.40
  -7   7   0   55.49   12.50
   7   7   0   61.09   15.10
   7   7   0   50.99    8.30
  -7   7   0   49.40    8.10
  -8  -7   0   41.60   14.50
  -8  -7   0   33.90    8.60
   8  -7   0   42.20   16.40
   8  -7   0   30.30    6.20
  -8  -7   0   39.50    8.00
   8  -7   0   27.20    7.40
   8  -7   0   31.90    7.60
   8  -7   0   31.70    7.20
   8  -7   0   50.09   10.10
  -8  -7   0   28.60    7.00
  -8  -7   0   34.30   13.00
   8   7   0   26.70   14.80
  -8   7   0   47.60    9.70
   8   7   0   23.80    6.00
   8   7   0   27.00   12.80
  -8   7   0   42.80   13.80
  -8   7   0   39.90   10.10
   8   7   0   35.20    7.20
   8   7   0   38.10    8.50
   8   7   0   32.00    7.80
   8   7   0   27.30    8.00
  -8   7   0   45.50    7.80
  -9  -7   0   50.59    7.80
  -9  -7   0   47.80   11.90
  -9  -7   0   44.90    8.70
   9  -7   0   41.10   14.50
   9  -7   0   47.50    8.80
   9  -7   0   53.09    9.70
  -9  -7   0   58.79   16.20
   9  -7   0   39.00    8.40
   9  -7   0   64.89   11.10
  -9  -7   0   31.60    8.00
   9  -7   0   64.89   11.50
  -9   7   0   47.60    8.90
   9   7   0   44.00    8.40
   9   7   0   47.10    7.30
  -9   7   0   34.80    8.10
  -9   7   0   42.70    9.70
   9   7   0   57.39    8.50
   9   7   0   53.99   16.10
   9   7   0   38.10   17.30
  -9   7   0   29.40   14.90
   9   7   0   41.00    9.90
  -9   7   0   41.30   10.40
 -10  -7   0   73.29   18.50
 -10  -7   0   75.89   12.70
  10  -7   0   69.09   10.10
 -10  -7   0   69.89    9.50
  10  -7   0   85.09   10.00
  10  -7   0   74.29   12.70
 -10  -7   0   75.29   11.30
  10  -7   0   81.89   12.20
  10  -7   0  119.39   23.90
 -10  -7   0   84.49   15.70
  10  -7   0   82.59   11.90
  10   7   0   94.19   13.70
 -10   7   0   76.49   12.40
  10   7   0   81.99   12.40
 -10   7   0   86.49   12.80
 -10   7   0   84.29   10.90
  10   7   0   73.59    9.30
  10   7   0   88.19   12.10
  10   7   0   71.99   20.70
 -10   7   0   75.19   11.30
 -10   7   0   85.39   19.40
  10   7   0  102.09   22.60
  11  -7   0   23.20   12.90
  11  -7   0    3.30    7.90
  11  -7   0   18.30    9.80
  11  -7   0    6.70    7.90
 -11  -7   0    5.90   11.90
 -11  -7   0    7.60    6.90
 -11  -7   0    7.10    5.20
  11  -7   0   27.80   19.40
 -11  -7   0    8.70   14.30
 -11  -7   0   12.00    6.50
  11  -7   0    6.90    5.30
 -11   7   0   -4.60   13.40
  11   7   0    9.40    6.70
  11   7   0   17.60    6.90
  11   7   0   12.00    6.40
 -11   7   0    4.80    5.40
  11   7   0   -5.30   19.00
 -11   7   0    5.10    6.10
  11   7   0   -2.80   17.00
 -11   7   0   -2.10    6.10
  11   7   0    7.00    5.50
 -11   7   0   45.90   11.60
  12  -7   0  -16.00    7.10
  12  -7   0   -4.40   13.90
  12  -7   0   12.90   10.50
  12  -7   0   27.00   13.60
 -12  -7   0    3.80    6.60
 -12  -7   0  -12.70    4.70
 -12  -7   0    3.50   10.40
  12  -7   0    8.80    7.70
 -12  -7   0   13.40   10.10
 -12  -7   0   -6.30    9.10
 -12   7   0    4.20    9.50
  12   7   0    6.90   10.10
 -12   7   0   15.00   22.00
 -12   7   0    7.20    8.00
  12   7   0    0.80   19.20
  12   7   0   10.30    6.40
  12   7   0   -5.60    4.40
  12   7   0   10.70   14.00
 -12   7   0    8.00    7.10
  12   7   0   -0.30   14.60
 -12   7   0   -7.10    8.10
  13  -7   0    6.80    5.90
  13  -7   0    0.90   16.90
 -13  -7   0   32.00   15.10
 -13  -7   0   11.10    7.60
 -13  -7   0   -2.20    6.30
 -13  -7   0    8.70   15.20
  13  -7   0    0.80    5.10
  13  -7   0   -1.60    9.10
 -13  -7   0   -3.40    8.50
  13  -7   0    6.20   10.10
  13  -7   0   11.20   10.10
  13   7   0   -2.30    5.30
 -13   7   0    2.80    6.60
  13   7   0   -4.20    7.30
 -13   7   0   -0.90    9.60
 -13   7   0    9.00    6.40
 -13   7   0   -1.10    5.60
  13   7   0   -2.50   20.90
  13   7   0   -0.50    9.50
  13   7   0   -7.80   20.20
  13   7   0    2.30    9.20
 -13   7   0    8.40   11.80
 -14  -7   0    8.00    8.50
  14  -7   0    0.10   13.00
  14  -7   0   -2.10    6.00
 -14  -7   0  -14.20   14.00
 -14  -7   0    0.10    6.10
 -14  -7   0   -0.30   10.60
  14  -7   0   -8.10   23.90
 -14  -7   0   39.10   14.40
  14  -7   0    3.30   10.70
  14   7   0   -0.80    6.50
  14   7   0   -6.70   21.90
 -14   7   0   -2.10    6.20
  14   7   0    1.10    8.20
  14   7   0    3.60    6.30
 -14   7   0   26.60   14.80
 -14   7   0   -3.70    9.80
 -14   7   0   -8.00    8.70
  14   7   0  -23.20   15.20
  14   7   0    2.70    7.00
 -14   7   0    0.80    9.50
  15  -7   0    2.50    9.50
  15  -7   0   -0.40    6.80
 -15  -7   0    7.40   12.80
 -15  -7   0   -1.30    8.20
 -15  -7   0   16.60    9.70
 -15  -7   0   -5.30    9.90
  15  -7   0  -10.10   12.70
  15  -7   0    1.30   10.50
  15  -7   0  -29.00   45.80
  15   7   0   -7.80   24.60
 -15   7   0    0.50    8.50
 -15   7   0   32.20   13.90
 -15   7   0   -3.10    9.70
  15   7   0   -8.50    9.90
 -15   7   0   -4.50   11.80
  15   7   0    9.00    6.80
  15   7   0    0.00    6.90
  15   7   0   -9.20   15.40
 -15   7   0   -7.40   10.10
   0  -8   0   32.10    7.30
   0  -8   0   40.80    8.30
   0  -8   0   40.30    6.80
   0  -8   0   46.50    7.70
   0  -8   0   40.90   10.30
   0   8   0   33.60    6.00
   0   8   0   35.40    7.70
   0   8   0   33.10    3.70
   0   8   0   40.20    6.60
   0   8   0   34.40    6.80
   0   8   0   50.29    7.00
   1  -8   0    8.60    6.00
  -1  -8   0    3.70    3.40
   1  -8   0    8.90    5.30
  -1  -8   0    3.90    5.10
  -1  -8   0    0.10    6.00
   1  -8   0    1.60    5.50
   1  -8   0    4.00    4.80
  -1  -8   0   -0.90    6.40
  -1  -8   0    9.10    7.30
   1  -8   0    5.00    4.90
  -1  -8   0   -2.30    4.50
  -1   8   0    0.30    4.60
   1   8   0    6.50    6.80
  -1   8   0   12.70    5.30
   1   8   0    2.30    2.20
   1   8   0    7.30    3.70
  -1   8   0   -3.30    6.50
   1   8   0   11.50    3.80
  -1   8   0    4.90    4.60
  -1   8   0    6.20    2.90
  -1   8   0    8.40    7.10
   1   8   0   12.70    4.90
  -2  -8   0   -6.00    5.10
   2  -8   0   -1.80    4.60
   2  -8   0   -7.20    4.40
   2  -8   0   -1.10    7.90
  -2  -8   0    5.80    7.30
  -2  -8   0   -1.30    2.20
  -2  -8   0   -7.60    4.70
  -2  -8   0   -2.30    4.70
   2  -8   0  -11.00    6.90
  -2  -8   0   -3.80    5.10
   2  -8   0   -6.40    4.40
  -2   8   0    3.50    5.60
  -2   8   0   -2.00    4.50
  -2   8   0   -5.40    3.10
   2   8   0   -3.60    6.90
  -2   8   0   -3.70    2.40
   2   8   0    0.30    3.40
   2   8   0    2.40    5.90
   2   8   0   -3.80    4.50
   2   8   0    4.10    4.90
  -2   8   0   -2.50    6.70
  -2   8   0    0.00    6.90
  -3  -8   0    2.00    3.70
  -3  -8   0    1.60    4.40
  -3  -8   0    1.70    5.20
   3  -8   0    1.20    5.70
   3  -8   0   -3.80    4.80
  -3  -8   0    6.90    5.00
  -3  -8   0  -12.90    9.50
   3  -8   0   -1.90    5.90
  -3  -8   0    0.60    5.90
   3  -8   0   -4.30    3.20
   3  -8   0   -4.80    5.50
  -3   8   0   -0.70    4.90
   3   8   0   -7.40    7.30
  -3   8   0   -1.10    4.40
   3   8   0    0.60    2.70
  -3   8   0    5.50    6.30
  -3   8   0   -1.90    7.00
  -3   8   0   -2.70    4.90
  -3   8   0   -1.90    8.10
   3   8   0    2.20    5.30
   3   8   0    1.00    4.80
   3   8   0   -2.30    3.30
  -4  -8   0   52.59   10.40
   4  -8   0   50.49    7.40
   4  -8   0   47.70    9.20
  -4  -8   0   50.29    6.40
   4  -8   0   48.20   10.70
  -4  -8   0   53.19   11.80
  -4  -8   0   56.09    7.60
   4  -8   0   45.80    7.80
  -4  -8   0   49.50    7.20
  -4  -8   0   45.80   10.30
   4  -8   0   56.29    6.50
   4  -8   0   40.50    8.10
   4   8   0   59.29    7.70
  -4   8   0   41.20   10.90
   4   8   0   43.80    6.30
  -4   8   0   58.59    7.80
  -4   8   0   65.39    9.00
   4   8   0   47.60    9.50
   4   8   0   50.89    8.50
   4   8   0   59.29   14.70
  -4   8   0   46.60    7.90
  -4   8   0   63.49    6.40
   5  -8   0   86.79   11.20
   5  -8   0  103.59   14.40
   5  -8   0   73.79    8.00
   5  -8   0   99.69   10.60
   5  -8   0   66.59   12.30
  -5  -8   0   94.79   11.80
  -5  -8   0   98.59   11.00
  -5  -8   0  121.89   19.30
   5  -8   0   65.29    9.70
  -5  -8   0   82.79    7.50
  -5  -8   0   85.39    8.60
  -5   8   0   88.99    7.90
   5   8   0   92.29   10.80
   5   8   0   81.39   14.20
  -5   8   0  100.99   11.00
   5   8   0   81.19   13.10
  -5   8   0  100.49   12.50
  -5   8   0   87.59   12.60
   5   8   0   85.09    8.90
  -5   8   0   90.69    9.00
   5   8   0   68.69    8.60
   5   8   0   97.69    9.70
   6  -8   0   22.20    5.50
  -6  -8   0   41.40   12.80
   6  -8   0   29.40    9.40
  -6  -8   0   27.60    6.50
   6  -8   0   25.50    8.00
  -6  -8   0   15.00   10.60
   6  -8   0   35.90   11.30
   6  -8   0   20.70    5.80
  -6  -8   0   33.80    7.00
   6  -8   0   36.30    7.80
  -6  -8   0   30.90    8.10
   6  -8   0   33.40    7.10
  -6   8   0   22.20    9.10
  -6   8   0   25.90    7.40
   6   8   0   29.20    7.10
   6   8   0   36.10    5.80
  -6   8   0   24.00    5.70
   6   8   0   26.70   11.50
  -6   8   0   33.90   11.80
   6   8   0   29.80    9.40
   6   8   0   25.80    6.20
  -6   8   0   34.10    7.10
   6   8   0   24.20    7.50
   7  -8   0    6.70    5.10
  -7  -8   0   -2.40   10.90
  -7  -8   0   12.40    5.60
   7  -8   0    5.00    6.50
   7  -8   0   -0.30   10.70
   7  -8   0    3.20    6.40
  -7  -8   0    9.30   11.50
   7  -8   0   11.60    9.10
   7  -8   0    3.70    4.70
   7  -8   0    6.30    5.60
  -7  -8   0    5.30    4.70
   7   8   0    6.00    5.10
  -7   8   0    3.30    7.80
   7   8   0    3.90    8.20
  -7   8   0   13.50    7.50
   7   8   0    6.30    4.50
   7   8   0    8.80   15.40
  -7   8   0    6.30    5.10
   7   8   0    3.50    3.90
  -7   8   0    1.40    9.90
   7   8   0    1.60    4.70
  -7   8   0    8.20    5.00
   7   8   0   10.10    5.20
   8  -8   0   24.30   14.40
  -8  -8   0    3.20    7.40
   8  -8   0   11.30    6.60
  -8  -8   0   11.70   12.10
  -8  -8   0   12.00    5.00
   8  -8   0   18.10    7.60
  -8  -8   0    0.50   12.10
   8  -8   0    8.70    5.80
   8  -8   0   12.70    8.20
   8  -8   0    2.80    5.90
  -8  -8   0    6.40    7.10
   8  -8   0   17.50   11.90
  -8   8   0    8.40    5.10
   8   8   0   11.80    6.00
  -8   8   0    0.20    8.40
   8   8   0   13.10   17.60
   8   8   0   20.40    8.10
   8   8   0    8.20    6.80
   8   8   0    7.40    5.60
  -8   8   0    8.90    5.80
  -8   8   0   15.70    8.90
  -8   8   0   10.80    5.80
   8   8   0    8.60   13.40
  -9  -8   0    9.20   13.40
  -9  -8   0   -3.60    6.00
   9  -8   0    5.10    6.20
   9  -8   0   -4.80    8.00
   9  -8   0    2.40    7.50
   9  -8   0    8.40    7.50
  -9  -8   0    2.80   12.50
   9  -8   0   -2.30    6.80
   9  -8   0    7.00   11.90
   9  -8   0    0.60    7.40
  -9  -8   0   -9.00    7.40
  -9  -8   0    4.20    6.40
  -9   8   0    1.30    6.30
  -9   8   0    7.50    5.10
   9   8   0    6.70   10.30
   9   8   0   -3.80    8.00
   9   8   0  -10.50    6.20
   9   8   0    1.80    4.30
   9   8   0   -4.10    4.70
   9   8   0   10.90    5.70
   9   8   0   -6.90   18.30
  -9   8   0    2.40    8.50
  -9   8   0   -8.40   10.80
  -9   8   0    3.40    6.30
 -10  -8   0   -4.60   14.00
  10  -8   0   11.20   21.80
  10  -8   0   25.10   10.50
  10  -8   0   11.00    9.10
  10  -8   0   15.90    7.60
  10  -8   0   17.20    8.50
 -10  -8   0   25.20    9.90
  10  -8   0   12.10    5.90
 -10  -8   0    9.00    9.50
 -10  -8   0   21.30    9.50
 -10  -8   0   26.10    8.10
  10   8   0   16.20    6.60
  10   8   0    7.60    5.50
 -10   8   0   29.30    7.80
  10   8   0   -1.70    8.20
 -10   8   0   12.80    7.80
  10   8   0  -17.60   19.00
  10   8   0   23.10   18.00
  10   8   0   23.70    8.60
  10   8   0    6.00    6.60
 -10   8   0   19.80    9.00
 -10   8   0    8.90   13.70
 -10   8   0   31.70   10.30
 -11  -8   0   -5.80   13.50
  11  -8   0    1.40    6.20
  11  -8   0    6.20   12.90
  11  -8   0    2.60    7.30
  11  -8   0    4.60    8.60
 -11  -8   0    0.70    5.70
  11  -8   0   -1.10    9.40
 -11  -8   0   -9.10    9.20
 -11  -8   0  -13.00    7.60
 -11  -8   0    2.40    8.90
  11  -8   0   -7.80   11.70
  11   8   0    4.60   12.60
  11   8   0    0.10    5.40
  11   8   0   -2.70    4.80
  11   8   0    4.00    6.50
  11   8   0    9.40    9.10
  11   8   0   -1.10   35.10
 -11   8   0    2.90    7.20
  11   8   0   12.20    8.80
 -11   8   0    5.40   13.50
 -11   8   0  -10.00    5.20
 -11   8   0   13.70   10.70
 -11   8   0   -2.50    8.10
  12  -8   0    0.90    7.60
  12  -8   0    9.70    8.60
 -12  -8   0   -7.60    8.30
  12  -8   0    3.80    7.50
 -12  -8   0    8.10    9.40
 -12  -8   0    8.00   13.10
 -12  -8   0    8.70   15.70
  12  -8   0    6.90   19.80
 -12  -8   0    4.00    7.80
  12  -8   0   -4.30   13.00
 -12   8   0    2.60   14.50
  12   8   0   21.30   10.70
 -12   8   0   -3.60    9.20
 -12   8   0   13.90    6.70
 -12   8   0    6.00    7.00
 -12   8   0   -0.70    9.00
  12   8   0    1.30   14.50
  12   8   0    7.00    5.90
  12   8   0   10.90    7.50
  12   8   0   -7.70   15.00
  12   8   0    1.70    7.80
  13  -8   0    4.50    7.40
 -13  -8   0    7.00    7.70
  13  -8   0    9.60   23.40
 -13  -8   0   -0.70    9.90
 -13  -8   0    5.20   11.50
  13  -8   0   13.30   11.70
  13  -8   0    6.20    5.90
 -13  -8   0   28.10   21.50
 -13  -8   0   21.60    9.40
  13  -8   0    1.40    8.60
 -13   8   0   18.70   11.70
  13   8   0   23.20    8.30
 -13   8   0   25.00   11.20
  13   8   0   -4.30    7.50
  13   8   0    8.60    7.90
  13   8   0   10.30   15.00
  13   8   0    6.80    9.40
 -13   8   0   11.70    8.60
 -13   8   0   18.20   11.70
  13   8   0   18.30    7.00
  13   8   0   12.70   22.90
  14  -8   0    3.00    8.70
  14  -8   0   -2.60    7.70
 -14  -8   0    3.60    9.30
  14  -8   0   -1.40   25.10
  14  -8   0   12.80   14.20
 -14  -8   0    2.10   14.80
 -14  -8   0    8.40    9.50
  14   8   0    5.40   17.10
 -14   8   0   15.50   10.60
 -14   8   0    6.60    8.40
  14   8   0   15.00   11.20
  14   8   0    4.70   20.70
  14   8   0   -0.50    5.70
 -14   8   0   -1.00   10.80
  14   8   0   -6.20    6.80
 -14   8   0   -6.90    8.00
  14   8   0   -4.30    9.60
 -14   8   0    7.30   10.00
 -15  -8   0    3.60    8.30
 -15  -8   0    7.80   15.90
 -15  -8   0    4.90    7.10
  15  -8   0    6.10   10.00
  15  -8   0  -18.00   12.40
  15  -8   0  -32.10   18.50
  15  -8   0   12.60    7.60
  15  -8   0    4.70    6.10
  15  -8   0   -9.40    7.10
 -15  -8   0   -4.10   10.80
 -15   8   0    1.70    9.70
 -15   8   0   -2.50   11.60
  15   8   0    1.80    6.50
 -15   8   0    3.20    6.70
  15   8   0    5.10   24.00
  15   8   0   16.30   13.20
  15   8   0    3.30    9.80
  15   8   0   -2.10   10.10
  15   8   0   -7.50   23.90
   0  -9   0   -5.20    4.30
   0  -9   0   -1.20    4.60
   0  -9   0  -10.60    3.90
   0  -9   0    0.90   14.30
   0   9   0    1.10    3.60
   0   9   0  -13.40    6.20
   0   9   0    0.30    2.70
   0   9   0   -3.60    4.50
   0   9   0    2.10    3.20
   0   9   0    2.90    8.30
  -1  -9   0    4.10    5.00
   1  -9   0   -0.30    5.00
   1  -9   0    1.10    5.60
  -1  -9   0   -2.60    4.40
   1  -9   0    4.00    5.60
  -1  -9   0   -3.90    6.00
  -1  -9   0    4.20    6.90
  -1  -9   0   -0.70    3.00
  -1  -9   0   -4.40    4.50
   1  -9   0   -1.00    4.80
   1  -9   0   -3.70    4.50
  -1   9   0    0.60    3.30
   1   9   0   -2.10    1.80
  -1   9   0   -2.60    2.60
   1   9   0    0.80    3.10
  -1   9   0    1.70    5.00
  -1   9   0  -14.90    6.90
   1   9   0   -1.80    6.50
  -1   9   0   -8.40    4.40
  -1   9   0   -0.10    3.70
   1   9   0   -0.80    4.60
   1   9   0    1.00    4.60
  -2  -9   0  211.68   10.70
   2  -9   0  193.68   14.20
   2  -9   0  197.08   12.30
  -2  -9   0  209.68   14.40
  -2  -9   0  217.38   12.80
   2  -9   0  233.38   15.80
  -2  -9   0  207.08   17.50
   2  -9   0  212.18   13.50
   2  -9   0  218.58   16.40
  -2  -9   0  197.98   13.60
  -2  -9   0  226.28   13.00
   2   9   0  204.28   13.40
   2   9   0  230.98   13.80
  -2   9   0  215.58   14.50
  -2   9   0  214.48   13.50
   2   9   0  222.88   14.20
   2   9   0  212.78   21.50
  -2   9   0  219.88   16.50
  -2   9   0  236.08   16.00
   2   9   0  228.68   11.10
   3  -9   0   49.99   10.80
   3  -9   0   37.80    8.40
  -3  -9   0   46.80    6.00
  -3  -9   0   45.30    9.40
   3  -9   0   41.50    7.40
  -3  -9   0   40.80    7.40
   3  -9   0   41.80    6.70
  -3  -9   0   37.90    7.10
   3  -9   0   49.60    8.80
  -3  -9   0   31.50   12.80
   3   9   0   41.90    5.70
  -3   9   0   49.80    5.80
  -3   9   0   55.09    8.30
  -3   9   0   46.60    8.30
   3   9   0   40.60   10.90
  -3   9   0   39.60    7.50
  -3   9   0   50.99    7.60
   3   9   0   34.70    6.30
   3   9   0   49.99    7.90
   4  -9   0  360.56   19.40
  -4  -9   0  368.66   26.80
   4  -9   0  372.46   20.10
  -4  -9   0  364.36   20.40
  -4  -9   0  357.86   17.80
  -4  -9   0  366.96   16.90
   4  -9   0  382.46   23.10
   4  -9   0  352.76   21.30
  -4  -9   0  403.86   19.80
  -4  -9   0  335.67   18.10
  -4   9   0  360.06   18.50
   4   9   0  376.36   20.00
   4   9   0  400.76   20.00
   4   9   0  376.66   28.90
   4   9   0  391.16   16.50
  -4   9   0  362.06   18.40
  -4   9   0  390.36   20.90
  -4   9   0  373.66   16.10
  -4   9   0  364.76   23.50
   4   9   0  383.46   18.30
  -5  -9   0  117.19   16.70
  -5  -9   0  129.59   12.40
   5  -9   0  122.69   14.20
   5  -9   0  142.99   16.30
   5  -9   0  133.09   14.50
  -5  -9   0  140.49   21.60
   5  -9   0  131.49   12.70
  -5  -9   0  127.89    9.20
   5  -9   0  153.48   12.10
   5  -9   0  137.29   15.20
  -5  -9   0  134.99   11.00
  -5   9   0  138.69   12.10
  -5   9   0  134.49    9.60
  -5   9   0  149.59   15.50
   5   9   0  133.99   11.10
  -5   9   0  137.59   14.80
  -5   9   0  132.99   11.20
   5   9   0  125.99   10.30
   5   9   0  115.39   12.20
   5   9   0  136.69   11.20
   5   9   0  138.89   23.50
   6  -9   0   47.90    9.00
  -6  -9   0   38.60    9.20
   6  -9   0   40.00    8.20
  -6  -9   0   50.89    8.20
   6  -9   0   42.30   12.30
   6  -9   0   41.10    9.80
  -6  -9   0   47.80   13.20
   6  -9   0   46.30    6.80
   6  -9   0   66.59   14.10
  -6  -9   0   60.69   12.60
  -6  -9   0   51.19    8.00
   6   9   0   44.10   17.70
   6   9   0   46.20    8.00
  -6   9   0   53.49    8.40
   6   9   0   48.50    7.00
   6   9   0   41.60   11.20
  -6   9   0   55.59    6.50
   6   9   0   62.29   13.30
  -6   9   0   48.60    8.80
  -6   9   0   36.60    7.70
  -6   9   0   49.10   12.80
   6   9   0   38.70    7.30
   7  -9   0   42.40    9.00
   7  -9   0   61.69   11.20
   7  -9   0   75.29   16.60
   7  -9   0   58.39   10.00
   7  -9   0   46.20    8.70
   7  -9   0   58.89    9.80
  -7  -9   0   60.19    9.30
  -7  -9   0   51.49   10.40
  -7  -9   0   49.30   12.50
  -7  -9   0   57.09    7.80
  -7  -9   0   64.19   14.80
   7  -9   0   60.89    8.40
  -7   9   0   47.70    6.70
  -7   9   0   34.20    8.70
   7   9   0   57.39   14.70
  -7   9   0   63.59    9.30
   7   9   0   37.50    7.60
   7   9   0   60.89    7.90
   7   9   0   52.09   10.30
  -7   9   0   50.99   14.00
   7   9   0   51.99    7.90
   7   9   0   52.19   15.30
  -8  -9   0   18.10    6.40
   8  -9   0   19.50    8.70
  -8  -9   0   16.80   13.60
   8  -9   0    8.40    5.70
  -8  -9   0   22.50    6.80
  -8  -9   0    9.80    7.90
  -8  -9   0   21.40   13.00
   8  -9   0   10.00   12.50
   8  -9   0   30.80    6.90
   8  -9   0   16.20    7.90
   8  -9   0   11.90   10.40
   8  -9   0    3.50    6.90
  -8   9   0   25.50    8.10
   8   9   0   14.00   10.60
   8   9   0   11.50    5.70
  -8   9   0   21.60    6.70
   8   9   0   12.10    5.00
   8   9   0   12.40    5.90
  -8   9   0   17.10    9.70
   8   9   0    7.60    7.50
  -8   9   0   14.30    5.90
   8   9   0   20.60    6.50
  -8   9   0    3.20   12.00
   8   9   0   -9.50   18.20
   9  -9   0   83.99   14.20
  -9  -9   0   95.39   10.20
   9  -9   0   99.59   12.30
   9  -9   0  104.69   17.20
  -9  -9   0  115.99   19.60
   9  -9   0   82.09   11.80
  -9  -9   0  115.29   14.70
   9  -9   0   89.89   11.30
  -9  -9   0   97.59   16.90
   9  -9   0  114.99   23.40
  -9  -9   0  115.09   14.80
   9  -9   0  101.49   13.90
   9   9   0   96.69   12.00
   9   9   0  105.29   18.60
  -9   9   0  110.89   15.20
  -9   9   0   96.69   17.70
  -9   9   0   86.89   12.40
  -9   9   0   94.79   12.50
  -9   9   0   98.49   11.60
   9   9   0   89.89   11.00
   9   9   0   57.89   11.50
   9   9   0  128.29   15.60
   9   9   0  109.29   24.50
   9   9   0   87.19    9.60
  10  -9   0   34.30   14.60
  10  -9   0   35.60    9.20
  10  -9   0   32.50    9.90
 -10  -9   0   27.30    9.90
  10  -9   0   38.60   16.60
 -10  -9   0   22.10    8.40
 -10  -9   0   33.90   10.20
 -10  -9   0   46.00   16.90
  10  -9   0   30.40    7.50
  10  -9   0   48.50   12.80
 -10  -9   0   28.00   12.40
  10  -9   0   28.10    9.80
 -10   9   0   27.30   12.80
  10   9   0   36.20    8.80
  10   9   0   14.80   17.10
  10   9   0   30.20   10.10
 -10   9   0   26.50   12.00
 -10   9   0   26.10    8.40
  10   9   0   15.30    7.10
 -10   9   0   29.40    8.80
  10   9   0    2.20   26.00
  10   9   0   36.30   10.90
  10   9   0   23.70    6.30
 -10   9   0   27.50    8.60
 -11  -9   0   36.20    9.60
 -11  -9   0   26.00   16.20
  11  -9   0   23.00   21.60
  11  -9   0   35.40    9.60
  11  -9   0   14.40    8.00
 -11  -9   0   28.90   10.70
  11  -9   0   21.20   14.80
 -11  -9   0   28.90   11.30
  11  -9   0   34.90    9.40
  11  -9   0   36.90   10.40
  11  -9   0   36.80    9.60
 -11  -9   0   42.50   15.90
 -11   9   0   28.00    8.80
 -11   9   0   43.70   16.90
  11   9   0   23.50    6.70
 -11   9   0   40.30    9.20
  11   9   0   35.80   22.80
  11   9   0   19.70    9.20
  11   9   0   31.00   10.50
 -11   9   0   20.40   10.50
  11   9   0   23.00    9.90
  11   9   0   39.10    8.40
 -11   9   0   30.90    8.90
  11   9   0   38.20   15.70
  12  -9   0   14.80    8.00
  12  -9   0   18.20   14.40
 -12  -9   0   -1.90   14.00
  12  -9   0   23.30   12.50
  12  -9   0    3.90    8.10
 -12  -9   0   18.00   12.50
 -12  -9   0    4.50    9.80
  12  -9   0   12.50    8.10
  12  -9   0    6.90   15.30
 -12  -9   0    1.50    7.40
 -12  -9   0   21.40    9.10
  12  -9   0    2.10    5.00
 -12   9   0   14.10   10.50
  12   9   0   11.30   19.40
 -12   9   0    7.70    8.00
 -12   9   0    4.50   10.60
  12   9   0   11.30    8.30
 -12   9   0   -0.10    6.40
  12   9   0    5.30    5.30
  12   9   0   -4.10   16.00
 -12   9   0   25.70   11.20
  12   9   0    0.70    8.60
  12   9   0    0.90    6.00
 -13  -9   0   33.80   18.00
 -13  -9   0   42.70   14.30
  13  -9   0   10.10   10.30
 -13  -9   0    6.90    7.80
  13  -9   0   14.80   18.10
  13  -9   0    7.60    6.80
  13  -9   0   15.40   11.30
 -13  -9   0    1.50    7.60
 -13  -9   0    9.50    9.60
  13  -9   0   16.70    7.50
  13  -9   0   20.50    9.70
  13   9   0   40.70   22.70
  13   9   0    6.40   10.60
 -13   9   0    9.80   11.20
  13   9   0   18.20    8.80
  13   9   0   47.30   25.10
  13   9   0   25.20    7.90
 -13   9   0   17.70    8.60
  13   9   0    9.10    6.90
 -13   9   0   13.10    8.40
  13   9   0   10.70    6.20
 -13   9   0   23.80   12.10
 -14  -9   0   -3.80   10.20
 -14  -9   0    6.50    8.20
 -14  -9   0  -12.40    9.00
  14  -9   0   13.60   12.10
  14  -9   0   -3.30    5.90
  14  -9   0  -25.90   22.90
  14  -9   0    8.80   14.10
  14  -9   0    1.30   10.00
 -14   9   0    1.20    7.40
 -14   9   0    6.90    8.50
  14   9   0  -11.50    9.50
  14   9   0    5.80    8.00
  14   9   0   22.40   25.80
 -14   9   0    4.30   10.20
 -14   9   0   -5.30    6.30
  14   9   0   14.50   22.10
 -14   9   0    2.40    7.90
  14   9   0   -6.50    4.90
  15  -9   0   12.00   14.40
 -15  -9   0  -11.10    6.60
 -15  -9   0    4.70   12.00
  15  -9   0   -1.70    6.80
 -15  -9   0   22.30   15.60
  15  -9   0    4.40    9.40
  15  -9   0    4.20    9.90
  15  -9   0    6.80    8.70
  15  -9   0  -49.30   25.10
 -15  -9   0   -5.90    7.10
 -15   9   0    2.30   11.30
  15   9   0    6.10    6.20
 -15   9   0   39.50   13.30
  15   9   0   28.00   17.20
  15   9   0  -18.10   25.20
 -15   9   0    8.60    8.20
  15   9   0    5.00    6.60
 -15   9   0    3.60    8.00
  15   9   0  -11.80    5.90
   0 -10   0  396.86   19.30
   0 -10   0  404.76   23.00
   0 -10   0  417.66   20.50
   0 -10   0  402.26   19.20
   0 -10   0  375.56   21.60
   0  10   0  431.86   20.10
   0  10   0  426.86   25.00
   0  10   0  416.36   16.40
   0  10   0  404.06   22.20
   0  10   0  470.65   22.60
   0  10   0  441.06   20.20
   1 -10   0   44.20    8.80
   1 -10   0   49.60    9.30
   1 -10   0   47.10   10.40
  -1 -10   0   52.69    9.80
  -1 -10   0   35.60    7.00
  -1 -10   0   44.30    7.70
  -1 -10   0   48.60   12.70
   1 -10   0   43.80    7.80
  -1 -10   0   39.80    4.80
   1 -10   0   48.90    7.90
  -1  10   0   42.70    7.00
  -1  10   0   42.40    6.70
   1  10   0   37.50    7.20
  -1  10   0   42.30    8.40
   1  10   0   43.40    6.90
  -1  10   0   53.69   10.10
   1  10   0   44.20    5.20
  -1  10   0   42.90    7.90
  -1  10   0   43.60    5.20
   1  10   0   40.70    8.60
   1  10   0   49.50   10.00
   2 -10   0    5.60    6.40
  -2 -10   0   11.90    4.30
   2 -10   0    8.10    5.70
  -2 -10   0    0.30    6.80
   2 -10   0   -3.40    6.10
  -2 -10   0    5.40    6.80
   2 -10   0    7.20    6.30
  -2 -10   0    8.20    6.20
  -2 -10   0   12.70    8.30
   2 -10   0    8.80   13.50
   2  10   0   -1.90    5.40
  -2  10   0    5.20    3.60
  -2  10   0    3.80    6.80
  -2  10   0   11.80    4.70
   2  10   0   11.30    5.60
   2  10   0   -2.20   10.70
   2  10   0    6.60    6.20
  -2  10   0    4.00    5.40
  -2  10   0   11.50    7.40
  -2  10   0    4.60    3.40
  -2  10   0   13.40    8.50
   3 -10   0   78.89   11.10
   3 -10   0   75.49   10.90
   3 -10   0   82.29   11.10
  -3 -10   0   77.49    8.40
  -3 -10   0   73.39    8.40
   3 -10   0   71.29    9.40
  -3 -10   0   57.49   10.50
  -3 -10   0   64.19    7.20
  -3 -10   0   66.09    9.30
  -3 -10   0   68.19   14.40
  -3  10   0   73.59    9.10
  -3  10   0   64.29    9.30
  -3  10   0   62.09    8.50
   3  10   0   68.99   15.50
  -3  10   0   75.49   10.10
   3  10   0   83.79   10.10
   3  10   0   72.39    6.30
   3  10   0   71.29    9.60
   3  10   0   76.99   10.60
  -3  10   0   78.79   11.60
  -3  10   0   70.19    6.70
  -4 -10   0   11.70    4.40
  -4 -10   0   13.80    8.30
   4 -10   0    4.90    6.30
   4 -10   0   25.50    9.20
  -4 -10   0   29.50    7.50
  -4 -10   0   20.20   12.60
   4 -10   0   19.90    6.90
  -4 -10   0    8.40    6.60
   4 -10   0   12.90    7.30
   4 -10   0   10.80    7.50
  -4 -10   0    7.50    4.70
  -4  10   0   20.10    4.80
   4  10   0   15.20    7.10
  -4  10   0    5.80    6.20
   4  10   0   11.60    6.70
   4  10   0    8.70   10.00
  -4  10   0   14.80    6.60
   4  10   0   15.50    5.00
  -4  10   0    9.50    4.80
  -4  10   0   25.90    8.20
   4  10   0   20.00    7.20
  -4  10   0   19.40    6.90
  -5 -10   0   21.90    6.40
   5 -10   0   24.40    8.70
  -5 -10   0   13.40    7.70
  -5 -10   0   31.50   13.00
   5 -10   0   27.30   11.20
  -5 -10   0   24.80    5.00
  -5 -10   0   35.40   13.80
   5 -10   0   42.30    8.40
   5 -10   0   28.00    6.30
   5  10   0   35.70   11.20
  -5  10   0   13.70    8.90
   5  10   0   35.80    5.70
  -5  10   0   25.60    5.60
   5  10   0   30.70    6.80
  -5  10   0   24.30    8.70
  -5  10   0   22.20    6.00
   5  10   0   27.30    7.10
   5  10   0   31.20   16.00
  -5  10   0   23.30    7.50
  -6 -10   0  104.39    9.20
   6 -10   0  118.09   14.20
  -6 -10   0  103.99   10.50
  -6 -10   0  105.09   16.30
   6 -10   0  120.89   12.60
  -6 -10   0  133.39   13.10
  -6 -10   0  123.99   19.20
   6 -10   0  113.89   12.80
   6 -10   0  123.19   17.70
   6 -10   0  114.89    9.70
   6 -10   0  102.59   12.70
  -6  10   0  107.89   11.40
  -6  10   0  120.59   11.20
  -6  10   0  110.69   14.70
  -6  10   0  108.99    8.60
   6  10   0  106.39   11.20
   6  10   0   98.09   20.70
  -6  10   0  102.39   14.80
   6  10   0  126.99   12.70
   6  10   0  127.49   10.70
   6  10   0  115.89   12.50
  -7 -10   0   39.50    9.80
   7 -10   0   34.40   14.40
   7 -10   0   30.60    8.30
   7 -10   0   25.80    8.80
  -7 -10   0   19.40    5.20
   7 -10   0   17.40    6.00
   7 -10   0   32.80    7.20
  -7 -10   0   39.90   13.70
   7 -10   0   25.50    9.40
  -7 -10   0   17.90   14.70
  -7 -10   0   36.90    7.80
   7 -10   0   28.10   10.50
  -7  10   0   32.10    5.70
  -7  10   0   30.50    8.20
  -7  10   0   23.10   10.20
  -7  10   0   29.60    7.10
   7  10   0   27.20   14.30
   7  10   0   40.80    9.30
   7  10   0   36.70    7.70
  -7  10   0   38.40   10.70
   7  10   0   25.20    7.30
   7  10   0   31.60   12.20
   7  10   0   26.90    7.10
   8 -10   0    7.90    6.90
   8 -10   0    5.00    6.10
   8 -10   0    7.30   14.50
  -8 -10   0    8.90    9.90
  -8 -10   0   -0.10    8.70
  -8 -10   0    3.00    7.90
   8 -10   0    0.30    5.20
   8 -10   0    6.50   12.20
  -8 -10   0    9.70    5.80
  -8 -10   0    1.00    4.20
   8 -10   0    2.60    3.80
   8 -10   0    0.80   12.50
   8  10   0    5.30    4.70
  -8  10   0    8.40    5.70
   8  10   0   -4.80    4.80
   8  10   0   12.10    7.30
   8  10   0   25.90   13.00
   8  10   0    5.80   19.50
  -8  10   0   10.20    8.20
  -8  10   0   12.00    7.40
   8  10   0    0.10    6.90
  -8  10   0    7.30    5.40
   8  10   0   -3.30    5.60
  -8  10   0    0.00    8.40
  -9 -10   0  127.89   15.70
   9 -10   0  121.99   14.00
   9 -10   0  136.89   21.50
   9 -10   0  143.49   19.60
   9 -10   0  139.79   14.50
   9 -10   0  153.28   16.60
   9 -10   0  117.89   13.60
  -9 -10   0  135.99   21.50
  -9 -10   0  127.59   13.90
  -9 -10   0  124.19   16.10
  -9 -10   0  128.19   21.00
   9 -10   0  148.39   13.90
   9  10   0  175.38   28.30
  -9  10   0  122.09   14.00
   9  10   0  134.19   14.30
   9  10   0  144.89   12.80
  -9  10   0  103.09   14.10
  -9  10   0  145.09   16.50
  -9  10   0  134.79   11.40
   9  10   0  115.59   11.30
  -9  10   0  163.88   24.50
   9  10   0  153.78   16.70
   9  10   0  143.49   23.40
   9  10   0  146.19   17.20
 -10 -10   0   26.50    9.70
  10 -10   0   33.50   19.60
  10 -10   0   22.50    7.00
 -10 -10   0   22.90   14.60
  10 -10   0   17.30    9.60
 -10 -10   0   23.70    9.90
  10 -10   0   21.00    9.20
 -10 -10   0   15.10   14.90
  10 -10   0   23.30    8.30
 -10 -10   0   13.30    6.80
  10 -10   0   26.80   15.20
  10 -10   0   27.50    8.70
  10  10   0   44.70   23.20
  10  10   0   13.60    5.90
  10  10   0   12.90    7.50
  10  10   0   18.80    9.40
  10  10   0   19.80    9.80
 -10  10   0   11.60    7.10
 -10  10   0   22.70    8.40
 -10  10   0   18.60   12.30
 -10  10   0   28.40   12.20
  10  10   0   31.00   17.30
  10  10   0   10.90    9.90
 -10  10   0   26.90    6.80
  11 -10   0    0.20   13.70
  11 -10   0   15.20    7.60
 -11 -10   0   26.20   10.80
 -11 -10   0   14.10    8.60
  11 -10   0    9.10   14.40
  11 -10   0   12.70    7.80
 -11 -10   0    8.60   10.70
 -11 -10   0   13.60   11.10
 -11 -10   0    6.90    7.10
  11 -10   0   10.70    8.30
  11 -10   0   12.90    7.50
  11 -10   0    1.80   10.00
 -11  10   0   -1.60    7.30
  11  10   0    9.70    6.70
  11  10   0   -2.80    5.30
 -11  10   0    2.60   10.10
  11  10   0   14.60   10.10
 -11  10   0    9.60   10.40
  11  10   0   14.00   20.70
  11  10   0    4.00    6.30
 -11  10   0  -15.90    7.80
  11  10   0    2.80    5.30
 -11  10   0   18.00    6.00
  11  10   0    9.30   17.80
  12 -10   0   -5.20   17.20
 -12 -10   0   -6.80    9.60
  12 -10   0   17.50    8.20
  12 -10   0    6.80    6.50
 -12 -10   0   10.50    8.60
 -12 -10   0   10.80   15.30
  12 -10   0    8.40    6.00
  12 -10   0   -5.90   20.90
 -12 -10   0   26.40   10.50
  12 -10   0   -9.60    9.90
  12 -10   0   -0.10    7.30
  12  10   0    4.40    5.40
 -12  10   0   -0.10    7.40
  12  10   0    9.60   23.70
  12  10   0   30.80   20.20
 -12  10   0   22.50   11.60
 -12  10   0    4.80    8.40
 -12  10   0   -9.40    6.20
 -12  10   0   16.00    8.30
  12  10   0   11.40    9.60
  12  10   0   30.80    9.40
  12  10   0   12.20    9.90
  13 -10   0   17.50    7.90
 -13 -10   0    7.50    9.00
 -13 -10   0    0.50    7.70
 -13 -10   0    9.60    9.80
  13 -10   0   11.50   11.20
 -13 -10   0    3.70   11.20
  13 -10   0   24.40   10.00
  13 -10   0  -13.50   24.20
 -13 -10   0   10.80   14.10
  13 -10   0    3.20    7.60
  13 -10   0    0.50    8.30
 -13  10   0   10.30   11.00
  13  10   0   12.90   12.20
  13  10   0    1.40   18.40
 -13  10   0    1.90    9.00
  13  10   0    6.30    7.30
 -13  10   0    7.20   10.80
  13  10   0   16.10   20.90
 -13  10   0   13.90    8.80
  13  10   0    4.40    8.20
  13  10   0   30.00    8.00
 -13  10   0   13.20   12.00
 -14 -10   0    7.10   10.20
  14 -10   0   16.20    9.60
 -14 -10   0   55.69   16.70
  14 -10   0  -14.50   17.70
 -14 -10   0   15.20   15.80
 -14 -10   0   -2.80    9.70
  14 -10   0   11.90    9.20
  14 -10   0   32.50    9.20
  14 -10   0    9.50   14.80
  14 -10   0   21.70    9.60
  14 -10   0   -9.20   10.10
  14  10   0    0.20    6.60
 -14  10   0   15.10    9.50
  14  10   0   16.20   19.90
 -14  10   0   15.30   13.00
 -14  10   0   18.90   11.50
 -14  10   0    1.70    8.20
  14  10   0    7.10    7.60
  14  10   0    7.80   26.70
 -14  10   0    5.80   10.50
  14  10   0   11.60   12.80
   0 -11   0    8.90    8.30
   0 -11   0   -9.00    5.30
   0 -11   0   -0.70    3.60
   0 -11   0   -6.80   10.00
   0 -11   0    3.30    6.20
   0  11   0   -5.30    5.00
   0  11   0   -3.10    3.50
   0  11   0   -1.30    9.40
   0  11   0   -0.10    5.90
   0  11   0   -3.80    2.80
   0  11   0    2.70    7.90
   1 -11   0  153.78   12.10
   1 -11   0  150.28   13.30
  -1 -11   0  123.29   11.70
  -1 -11   0  131.19   16.40
  -1 -11   0  147.69   12.20
  -1 -11   0  129.49   12.30
  -1 -11   0  121.49   11.70
   1 -11   0  160.78   15.50
  -1 -11   0  131.79    8.90
   1 -11   0  152.28   12.60
   1 -11   0  136.09   14.90
  -1  11   0  157.68   12.50
  -1  11   0  150.68   16.90
  -1  11   0  153.88   12.60
   1  11   0  148.79   12.00
  -1  11   0  144.99   13.80
  -1  11   0  139.29   10.90
   1  11   0  138.79   16.00
   1  11   0  156.68   11.30
   1  11   0  153.48   12.60
  -1  11   0  143.89    8.60
   1  11   0  144.59   10.60
   2 -11   0   63.79    9.60
  -2 -11   0   62.29   10.30
  -2 -11   0   52.49    6.60
   2 -11   0   58.89   11.40
  -2 -11   0   64.29    8.70
   2 -11   0   57.09    8.10
  -2 -11   0   58.29    9.80
   2 -11   0   69.49   11.20
   2 -11   0   48.70    9.30
  -2 -11   0   60.79   11.60
  -2 -11   0   50.69    8.90
   2  11   0   61.39   10.20
   2  11   0   68.29    8.70
   2  11   0   66.29    9.60
   2  11   0   57.89    5.80
  -2  11   0   59.59    6.10
  -2  11   0   60.09    8.50
  -2  11   0   52.19    8.10
  -2  11   0   54.89    6.40
  -2  11   0   65.99   18.00
  -2  11   0   66.69   11.10
  -2  11   0   62.99   11.10
   2  11   0   50.49   13.70
  -3 -11   0   22.70   13.40
  -3 -11   0   35.10    8.50
   3 -11   0   28.10    8.90
   3 -11   0   35.70    9.50
   3 -11   0   29.60    9.20
  -3 -11   0   29.00    8.80
  -3 -11   0   26.80    7.60
  -3 -11   0   35.60    5.80
  -3 -11   0   20.20    7.10
   3 -11   0   38.60    6.90
   3 -11   0   24.80   11.60
  -3 -11   0   23.80    6.00
  -3  11   0   23.80    6.00
   3  11   0   20.60    5.20
  -3  11   0   29.90    7.60
   3  11   0   26.10    6.30
  -3  11   0   24.40    8.80
  -3  11   0   33.20    4.60
   3  11   0   17.80    8.20
  -3  11   0   23.20    7.50
   3  11   0   27.00    6.30
   3  11   0   34.40   14.40
  -3  11   0   41.40   11.10
  -4 -11   0   80.29   12.20
  -4 -11   0   98.89   11.50
   4 -11   0   81.79   10.30
  -4 -11   0   83.89   17.00
  -4 -11   0   88.69    7.70
   4 -11   0   85.59   13.70
   4 -11   0   81.09   13.80
  -4 -11   0   71.39    8.30
   4 -11   0   98.69   11.40
   4 -11   0   84.09   14.40
  -4 -11   0   80.29   10.80
   4  11   0   86.59    7.40
  -4  11   0   91.09   11.60
  -4  11   0   95.19   10.50
   4  11   0   87.49   15.10
  -4  11   0   77.89    7.40
   4  11   0   85.09   10.80
  -4  11   0   78.69   11.60
   4  11   0   78.89    9.30
   4  11   0   97.29   14.00
  -4  11   0   70.09   11.90
  -4  11   0   96.39   11.50
   5 -11   0    8.80    6.00
  -5 -11   0   10.00    7.10
  -5 -11   0    0.80    8.80
  -5 -11   0   -4.90    3.80
  -5 -11   0   -0.60    9.50
   5 -11   0   -6.20    3.60
   5 -11   0    2.00    7.50
   5 -11   0    6.10    6.40
  -5 -11   0   -2.60    4.30
   5  11   0   10.40    5.20
  -5  11   0    1.30    6.50
   5  11   0    0.40    6.50
   5  11   0   10.40    4.50
  -5  11   0    5.30    4.80
   5  11   0   -5.80    5.80
  -5  11   0   18.70    8.70
   5  11   0    9.90   15.90
  -5  11   0   -6.50    3.50
  -5  11   0    4.60    3.80
  -6 -11   0   -5.20    9.70
   6 -11   0   -5.40   10.40
  -6 -11   0    4.10    6.60
  -6 -11   0   -1.50    5.10
  -6 -11   0  -15.50    9.60
   6 -11   0    7.10    9.20
   6 -11   0    9.10    8.70
  -6 -11   0    8.60    7.10
   6 -11   0    2.90    4.00
  -6  11   0    3.60    3.30
  -6  11   0    1.50    4.50
   6  11   0    4.00    6.60
   6  11   0    0.30   11.70
   6  11   0    8.40    6.70
   6  11   0    8.40    4.00
  -6  11   0    4.50    9.70
   6  11   0   -3.50    6.40
  -6  11   0   -1.30    6.70
  -6  11   0    5.50    4.80
  -7 -11   0    8.40   10.20
  -7 -11   0   18.10   12.00
   7 -11   0    6.40   12.40
   7 -11   0    3.80    4.40
   7 -11   0    8.60    7.40
   7 -11   0    4.50    5.90
  -7 -11   0   10.00    7.40
  -7 -11   0   11.30    6.10
  -7 -11   0    4.80    5.40
   7 -11   0    3.20    5.20
   7 -11   0   -8.50   12.10
  -7  11   0   10.90    5.00
  -7  11   0    5.90    6.90
   7  11   0    3.40    6.60
   7  11   0    7.20    4.50
  -7  11   0    9.80    7.50
   7  11   0   -4.00   13.10
  -7  11   0   -5.90    8.70
   7  11   0   -0.40    4.20
  -7  11   0    1.10    4.60
   7  11   0    8.10    5.30
   8 -11   0    3.80    5.60
  -8 -11   0   -4.30    7.30
   8 -11   0   21.50    8.30
  -8 -11   0   -3.90   14.00
   8 -11   0   -2.20    5.70
   8 -11   0   10.90   11.70
  -8 -11   0    3.00    6.00
   8 -11   0    7.80    7.50
   8 -11   0    9.80    9.80
  -8 -11   0   12.90    7.20
  -8 -11   0   16.10   12.60
   8 -11   0   10.60    7.20
   8  11   0  -10.00   19.90
   8  11   0   21.20    6.60
  -8  11   0   11.30    4.70
  -8  11   0   -8.70   11.20
  -8  11   0   17.80    9.20
  -8  11   0    3.10    9.70
   8  11   0    5.50   12.10
   8  11   0    4.20    6.70
  -8  11   0   10.80    7.30
   8  11   0   10.70    7.80
   8  11   0   14.80    8.70
   9 -11   0   45.40    9.40
  -9 -11   0   52.69   12.00
   9 -11   0   86.79   24.10
   9 -11   0   56.89   11.70
   9 -11   0   52.49    8.40
   9 -11   0   57.19   13.60
   9 -11   0   58.69   16.70
  -9 -11   0   55.49   16.80
  -9 -11   0   63.99   11.30
  -9 -11   0   47.10   12.50
  -9 -11   0   49.80   18.40
   9 -11   0   54.09   10.60
   9  11   0   53.09   10.50
   9  11   0   59.59   10.80
   9  11   0   58.09   18.30
  -9  11   0   63.09    9.70
   9  11   0   59.79    9.90
  -9  11   0   51.79   16.40
  -9  11   0   60.19   13.00
  -9  11   0   68.29   17.70
   9  11   0   54.09    8.40
  -9  11   0   59.39   12.80
   9  11   0   36.00   27.20
   9  11   0   46.60   11.00
  10 -11   0   12.90    8.30
  10 -11   0    5.80    5.80
 -10 -11   0   21.10    6.80
  10 -11   0   15.70   19.30
  10 -11   0   21.40    9.20
  10 -11   0   21.10    8.50
 -10 -11   0   14.00   11.80
  10 -11   0   33.40    9.90
 -10 -11   0   12.40    9.20
  10 -11   0    9.60   15.10
 -10 -11   0   15.30    9.40
 -10 -11   0    5.70   13.90
 -10  11   0    6.40    8.90
  10  11   0   22.60   10.40
  10  11   0   18.30    6.80
  10  11   0   24.90    9.40
  10  11   0   16.10    6.00
 -10  11   0   21.00   14.00
  10  11   0   23.60   22.90
  10  11   0   -2.30   14.40
 -10  11   0   19.70    7.40
  10  11   0    7.30    8.30
 -10  11   0   15.40    8.50
 -10  11   0   18.40    7.90
  11 -11   0   11.30    7.90
 -11 -11   0   10.90    6.60
 -11 -11   0   17.90   14.20
 -11 -11   0   25.10   16.10
  11 -11   0    1.80    7.30
 -11 -11   0   14.50   10.60
  11 -11   0   14.60   17.20
 -11 -11   0   23.00   10.90
  11 -11   0   21.40   21.40
  11 -11   0   43.80   10.30
  11 -11   0    6.80   11.00
  11 -11   0   12.30    8.10
  11  11   0   15.90    5.90
  11  11   0   20.40   10.60
  11  11   0    3.70    7.70
 -11  11   0    6.90    6.60
  11  11   0   15.00    6.90
 -11  11   0   19.30    8.60
  11  11   0   17.60   17.50
  11  11   0   33.10   23.60
 -11  11   0    8.30   10.70
 -11  11   0    9.40    6.70
  12 -11   0   38.50   10.40
 -12 -11   0   17.80   12.40
 -12 -11   0   24.50    9.80
  12 -11   0    0.80   16.40
  12 -11   0   18.80   10.30
  12 -11   0   14.50   11.80
  12 -11   0   12.70    7.50
  12 -11   0   19.80    7.90
 -12 -11   0   24.70   11.40
 -12 -11   0   14.50   15.30
 -12 -11   0   20.20   10.50
  12 -11   0   17.30   15.40
 -12  11   0   14.10    7.20
  12  11   0   20.10   11.40
  12  11   0   13.00    5.90
 -12  11   0    8.30    6.10
  12  11   0   31.20   25.30
  12  11   0   24.80    8.60
  12  11   0   19.70   14.80
  12  11   0   14.50    6.70
 -12  11   0   12.40   10.80
  12  11   0   27.40   10.20
 -12  11   0   14.10   11.20
 -12  11   0   20.30   13.10
 -13 -11   0   58.29   18.90
  13 -11   0   55.79   18.20
  13 -11   0   63.99   11.40
 -13 -11   0   46.70   11.90
  13 -11   0   36.00   28.10
  13 -11   0   40.80   10.80
 -13 -11   0   22.00    8.30
  13 -11   0   60.39   15.50
 -13 -11   0   35.00   11.50
  13 -11   0   37.80   12.90
 -13 -11   0   61.49   22.90
 -13  11   0   35.30   12.10
  13  11   0   58.79   23.70
 -13  11   0   59.29   13.10
 -13  11   0   49.60   10.70
  13  11   0   49.50    9.50
  13  11   0   58.89   12.30
  13  11   0   48.40   21.40
 -13  11   0   44.90   12.40
  13  11   0   43.30   10.40
 -13  11   0   57.49   17.90
  13  11   0   63.19   13.50
  13  11   0   49.80    8.30
 -14 -11   0   11.80    9.40
  14 -11   0   -6.70    7.70
  14 -11   0    6.70   11.60
 -14 -11   0   12.60   11.60
  14 -11   0    2.40   10.70
 -14 -11   0    1.90    7.40
  14 -11   0    8.30    7.10
  14 -11   0  -41.50   30.20
  14 -11   0   -1.90   11.70
 -14 -11   0   -3.50   14.10
 -14  11   0    4.80    8.20
  14  11   0   24.80    6.10
 -14  11   0   -5.50    7.80
  14  11   0   -4.60   26.80
  14  11   0    7.80    7.20
 -14  11   0   -2.50   11.40
 -14  11   0    5.50   14.00
  14  11   0   17.70   12.80
 -14  11   0   23.50   12.00
  14  11   0    5.50   10.20
  14  11   0   14.90   21.50
   0 -12   0  300.77   19.40
   0 -12   0  294.57   17.80
   0 -12   0  292.07   21.50
   0 -12   0  281.27   17.60
   0 -12   0  295.87   18.70
   0  12   0  346.37   20.30
   0  12   0  325.67   18.50
   0  12   0  295.57   17.60
   0  12   0  324.87   24.40
   1 -12   0    1.10    9.30
   1 -12   0    3.80    6.20
  -1 -12   0   11.80    6.70
   1 -12   0    5.30    4.30
   1 -12   0    4.60    7.80
  -1 -12   0   16.00    6.60
  -1 -12   0   20.90    8.80
  -1 -12   0    8.10    4.10
  -1 -12   0   -0.60    6.20
   1 -12   0   13.50    9.80
  -1 -12   0    9.80   12.30
   1  12   0   21.60   12.50
  -1  12   0    5.90    9.10
   1  12   0   12.20    5.40
   1  12   0   12.00    3.40
   1  12   0   10.40    5.00
  -1  12   0   10.60    6.90
  -1  12   0    3.60    6.50
  -1  12   0   16.60    6.50
  -1  12   0   12.40    4.00
  -1  12   0    5.70    9.90
   1  12   0   16.00    7.10
   2 -12   0  109.59   17.30
   2 -12   0  100.29    9.80
  -2 -12   0  102.89   16.80
   2 -12   0  112.59   13.80
  -2 -12   0   90.89   11.30
   2 -12   0  102.89   12.90
  -2 -12   0   82.49   18.20
  -2 -12   0   86.79   11.50
  -2 -12   0   83.79    8.30
  -2 -12   0   88.39    9.90
   2 -12   0   97.69   12.70
  -2  12   0   92.89   13.10
   2  12   0   84.79    9.30
  -2  12   0  113.19   12.00
  -2  12   0   94.09    7.90
   2  12   0   96.79   17.10
  -2  12   0  103.39   14.10
   2  12   0   87.79   11.10
   2  12   0  105.39   13.50
  -2  12   0   85.79   11.40
  -2  12   0   88.19   10.40
   2  12   0   89.69    7.30
  -2  12   0   94.39    8.10
  -3 -12   0   32.60    6.90
  -3 -12   0   38.80   14.90
  -3 -12   0   31.80    9.50
   3 -12   0   35.40    8.10
   3 -12   0   35.50    9.70
  -3 -12   0   41.40    5.70
   3 -12   0   39.90   10.40
  -3 -12   0   23.20    7.80
  -3 -12   0   31.60    8.40
   3 -12   0   25.90    7.80
   3 -12   0   38.10   10.90
  -3 -12   0   29.50    8.30
  -3  12   0   36.20    5.80
  -3  12   0   37.40    8.90
  -3  12   0   28.30    7.80
  -3  12   0   38.70    7.40
   3  12   0   42.20    8.60
   3  12   0   35.30    7.90
  -3  12   0   34.10    9.70
   3  12   0   31.60    5.90
  -3  12   0   42.50   10.30
   3  12   0   35.80   15.70
  -4 -12   0   77.89    8.70
   4 -12   0   97.79   15.50
  -4 -12   0   74.09   10.30
   4 -12   0   82.49   13.90
   4 -12   0   58.19    8.50
  -4 -12   0   75.89   10.00
   4 -12   0   81.99   12.10
   4 -12   0   83.29    9.60
  -4 -12   0   82.59   10.90
  -4 -12   0   71.49   14.60
  -4  12   0   83.99   14.00
  -4  12   0   64.09    9.60
   4  12   0   76.59   11.10
   4  12   0   95.09   10.00
  -4  12   0   73.49    7.60
  -4  12   0   77.69   12.20
  -4  12   0   84.99   11.80
   4  12   0   65.59   15.10
   4  12   0   78.09   10.90
  -4  12   0   70.89   11.50
   4  12   0   88.59    8.70
  -5 -12   0    7.20    7.10
  -5 -12   0    5.10    6.70
  -5 -12   0  -10.40    8.70
   5 -12   0    4.80    7.00
  -5 -12   0    0.60    9.20
   5 -12   0    0.10    7.60
   5 -12   0    1.80    9.40
  -5 -12   0   -2.90    4.80
   5 -12   0   -2.50    8.40
  -5 -12   0   -5.80    3.30
   5 -12   0   -9.50    5.20
   5  12   0    5.10    7.60
  -5  12   0   -1.80    3.60
   5  12   0   -9.10    5.80
  -5  12   0   -1.80    6.40
   5  12   0   -2.40   11.40
   5  12   0    5.00    6.80
  -5  12   0    5.50   10.20
  -5  12   0    3.90    7.90
  -5  12   0    5.40    4.80
   5  12   0   -6.00    4.90
  -6 -12   0   -7.50    6.90
   6 -12   0   -3.90    8.40
  -6 -12   0    6.80   10.70
   6 -12   0   -4.10    7.50
  -6 -12   0   -3.20    9.50
   6 -12   0    0.00    6.60
  -6 -12   0   -1.30    6.60
   6 -12   0   -3.10    7.70
  -6 -12   0   -0.80    5.20
  -6  12   0    3.40    4.70
  -6  12   0    3.20    7.30
  -6  12   0   11.60   10.00
   6  12   0   -1.30   12.90
  -6  12   0   -1.70    4.20
   6  12   0   -5.80    6.10
  -6  12   0  -10.30    9.70
   6  12   0   -5.20    6.30
   6  12   0   -8.70    4.70
   6  12   0    0.00    7.20
  -7 -12   0    9.50    8.70
   7 -12   0   15.90   10.60
   7 -12   0   14.10   13.70
  -7 -12   0   18.50    8.10
   7 -12   0    9.80    7.80
  -7 -12   0    2.20   14.30
  -7 -12   0    5.00    4.50
  -7 -12   0    9.50    7.30
   7 -12   0    7.70    5.80
   7  12   0   -3.40    6.90
   7  12   0    6.60   19.10
  -7  12   0   10.70    5.60
  -7  12   0   18.70    8.30
  -7  12   0    4.80   10.20
   7  12   0    3.80    6.90
   7  12   0   10.90    6.30
  -7  12   0    9.60    8.90
   7  12   0   -4.30    5.90
  -7  12   0   10.70    5.80
   8 -12   0   18.60    9.00
   8 -12   0    8.50   16.10
  -8 -12   0   19.90   13.20
   8 -12   0   15.40    7.30
  -8 -12   0    8.40    5.60
   8 -12   0   18.30    8.50
   8 -12   0   19.20    8.50
   8 -12   0   20.60    6.60
  -8 -12   0   26.70    8.10
  -8 -12   0   14.20    6.60
  -8 -12   0    0.00   11.10
   8 -12   0   14.30   11.00
   8  12   0   16.30    7.80
   8  12   0   14.30    7.90
  -8  12   0   11.80    8.00
  -8  12   0   25.30   13.70
  -8  12   0   20.60    9.10
  -8  12   0    8.40   10.20
  -8  12   0   10.40    6.30
   8  12   0   23.70    8.20
   8  12   0    6.50    6.20
   9 -12   0    4.60    6.80
   9 -12   0    7.50    7.00
   9 -12   0   12.30   20.60
  -9 -12   0    2.10    6.20
   9 -12   0   -0.50    5.50
  -9 -12   0   13.10   11.00
   9 -12   0   12.90    7.90
  -9 -12   0   15.70   10.40
  -9 -12   0    5.10    5.70
   9 -12   0    0.20    9.70
  -9 -12   0    8.40    9.30
   9 -12   0   18.70   15.50
  -9  12   0   -5.30    8.50
   9  12   0    0.00    6.40
   9  12   0    1.70    6.10
   9  12   0   -4.20    4.60
  -9  12   0    4.10    6.20
  -9  12   0    5.60    6.30
   9  12   0    4.50   20.90
  -9  12   0   -0.40    5.60
  -9  12   0    4.90    7.90
   9  12   0    2.40    7.50
   9  12   0    2.40   11.80
   9  12   0    1.20    9.10
  10 -12   0   14.40    9.60
 -10 -12   0   13.60    8.30
  10 -12   0   -0.50    7.10
  10 -12   0   16.30   14.80
  10 -12   0   12.50    8.10
 -10 -12   0   19.60   10.60
 -10 -12   0    8.50    6.90
  10 -12   0    9.60    5.20
  10 -12   0    7.50   13.40
 -10 -12   0   23.50   15.20
 -10 -12   0    6.30   13.20
  10 -12   0    4.60    9.10
 -10  12   0   10.50    7.10
 -10  12   0    2.40    6.80
  10  12   0    5.50    6.40
  10  12   0    9.10    6.50
  10  12   0   17.60    6.80
 -10  12   0   20.00    5.90
  10  12   0    9.30    5.80
 -10  12   0   22.10   15.50
  10  12   0   22.00   10.30
  10  12   0   12.50   14.00
  10  12   0   13.00   22.00
 -10  12   0   14.60   11.00
  11 -12   0   18.30    7.60
 -11 -12   0   14.70   10.50
  11 -12   0   70.69   10.60
  11 -12   0   34.10    7.40
  11 -12   0   22.90   10.20
 -11 -12   0   49.20    9.10
 -11 -12   0   35.40   13.10
 -11 -12   0   37.20   11.60
  11 -12   0   59.29   14.80
  11 -12   0   29.70   22.00
  11 -12   0   36.40   16.10
 -11 -12   0   45.10   13.20
  11  12   0   41.70    8.50
 -11  12   0   21.70    9.20
 -11  12   0   46.80   12.20
  11  12   0   39.60   12.20
  11  12   0   58.99   25.40
  11  12   0   42.40    7.70
  11  12   0   37.30   10.80
 -11  12   0   34.80   10.20
 -11  12   0   22.80    8.30
 -11  12   0   44.70   18.80
  11  12   0   36.50   18.50
  11  12   0   11.50    8.90
  12 -12   0   51.69   16.90
 -12 -12   0   36.70   11.30
  12 -12   0   40.70   13.20
 -12 -12   0   50.79   17.50
  12 -12   0   35.90    9.60
 -12 -12   0   23.30    7.80
  12 -12   0   51.69   27.20
  12 -12   0   50.09   11.50
  12 -12   0   40.50   11.20
 -12 -12   0   45.20   17.70
 -12 -12   0   49.10   13.20
  12  12   0   21.30   26.90
 -12  12   0   48.20   16.50
 -12  12   0   37.60   13.60
 -12  12   0   41.40    8.60
  12  12   0   39.20    9.60
  12  12   0   37.70   11.60
  12  12   0   38.20    8.20
  12  12   0   38.80   10.80
  12  12   0   35.40   15.40
 -12  12   0   53.89   10.90
  12  12   0   62.49   14.40
 -12  12   0   36.30    9.90
 -13 -12   0   28.30   12.30
  13 -12   0    8.50    9.10
 -13 -12   0   15.40   11.10
  13 -12   0    6.20    9.00
 -13 -12   0   -6.90    6.30
  13 -12   0    8.00   18.90
  13 -12   0   -3.00    6.00
  13 -12   0   55.79   18.20
 -13 -12   0    2.10    8.90
 -13 -12   0    9.10   22.20
 -13  12   0   13.60   11.10
 -13  12   0    1.70   10.50
 -13  12   0   26.10   13.50
  13  12   0    4.80    6.40
  13  12   0   -6.90   10.10
 -13  12   0   -5.60   11.40
  13  12   0   20.90   12.40
  13  12   0    4.80    5.30
  13  12   0   20.40   27.90
  13  12   0   -0.80    6.80
  13  12   0   19.90   19.70
 -13  12   0   -6.70    7.40
  14 -12   0   20.80   13.20
  14 -12   0  -27.40   29.00
  14 -12   0   15.00   13.40
 -14 -12   0    9.50    8.10
 -14 -12   0    3.20    9.30
 -14 -12   0   27.00   13.70
  14 -12   0   22.90    9.00
  14 -12   0   16.80    9.00
 -14 -12   0   43.70   15.00
  14 -12   0    9.80    8.20
  14  12   0   15.40    6.90
  14  12   0    2.00   20.90
  14  12   0    7.80    7.40
 -14  12   0    9.80    6.40
 -14  12   0   37.80   17.10
  14  12   0   17.70    7.10
 -14  12   0   20.10   12.10
  14  12   0   -0.30    8.60
 -14  12   0   15.30    9.60
  14  12   0   11.50   20.70
  14  12   0    8.00   10.40
   0 -13   0    0.40   12.20
   0 -13   0   17.30    9.90
   0 -13   0    0.30    4.40
   0 -13   0   -5.00    5.70
   0 -13   0   -2.20    5.80
   0  13   0    3.60    6.80
   0  13   0    2.70    8.10
   0  13   0    3.30    6.00
   0  13   0   -6.10    4.90
   0  13   0   -4.00    3.70
  -1 -13   0  476.65   25.80
   1 -13   0  480.05   24.50
   1 -13   0  451.55   23.20
   1 -13   0  445.36   25.00
   1 -13   0  478.85   30.70
  -1 -13   0  442.26   24.40
  -1 -13   0  505.95   24.70
  -1 -13   0  496.05   33.00
  -1 -13   0  489.15   23.70
   1 -13   0  505.55   26.80
  -1  13   0  534.25   29.30
  -1  13   0  475.65   24.70
   1  13   0  499.65   20.10
  -1  13   0  537.85   25.20
   1  13   0  527.45   26.10
   1  13   0  541.55   33.30
  -1  13   0  490.55   27.80
   1  13   0  492.95   24.10
  -1  13   0  485.55   19.90
  -1  13   0  484.75   27.90
   2 -13   0    2.10    4.40
   2 -13   0    4.30    4.80
  -2 -13   0    6.30   14.30
  -2 -13   0    8.70    5.30
  -2 -13   0   10.10    7.00
  -2 -13   0    9.10    7.90
  -2 -13   0   -7.80    3.80
   2 -13   0    6.20   11.20
   2 -13   0   -5.70    7.70
  -2 -13   0    2.80    6.10
   2 -13   0    7.20    5.60
   2  13   0   -2.90    9.00
  -2  13   0    3.90    6.80
   2  13   0    1.60    4.50
   2  13   0    1.00    6.60
  -2  13   0   -4.70    8.80
  -2  13   0    1.00    4.00
  -2  13   0   -0.80    3.70
  -2  13   0    5.30    7.60
   2  13   0   -2.40   13.50
  -2  13   0    3.40    7.00
   2  13   0    0.40    3.80
   3 -13   0   62.29   12.40
   3 -13   0   51.09   13.10
  -3 -13   0   66.09    7.90
  -3 -13   0   52.69    8.90
   3 -13   0   57.59   11.50
  -3 -13   0   60.09   10.60
  -3 -13   0   60.99   11.10
   3 -13   0   52.59    8.90
  -3 -13   0   69.89   17.30
  -3 -13   0   76.89   11.30
   3 -13   0   47.00    9.30
  -3 -13   0   74.49   17.10
  -3  13   0   58.79   10.70
   3  13   0   58.59   10.50
  -3  13   0   62.09   12.00
   3  13   0   51.09   17.30
   3  13   0   57.59   11.70
  -3  13   0   56.29   13.40
  -3  13   0   62.39    7.00
  -3  13   0   59.99    7.10
  -3  13   0   66.49   12.70
  -3  13   0   45.50    8.70
   3  13   0   57.69    8.80
   3  13   0   57.79    7.40
   4 -13   0    6.00    9.70
   4 -13   0   15.80   10.10
  -4 -13   0    5.10    5.10
  -4 -13   0   10.30    9.40
   4 -13   0    0.60    6.00
  -4 -13   0    4.00    5.20
  -4 -13   0   -5.90    5.60
  -4 -13   0   10.40    7.30
  -4 -13   0    5.00    6.80
   4 -13   0    4.20   12.60
  -4 -13   0    7.30   11.20
   4 -13   0    3.90    6.30
   4  13   0    1.80    5.20
  -4  13   0    8.50    4.30
   4  13   0    4.80    8.80
  -4  13   0   15.00    7.20
  -4  13   0    8.20    5.90
   4  13   0   -3.80    4.40
  -4  13   0    3.50    6.60
  -4  13   0    6.20    7.20
  -4  13   0    9.20    9.80
   4  13   0   12.40    7.40
   4  13   0    8.30   12.40
   5 -13   0   29.40   10.50
  -5 -13   0    6.80    4.20
  -5 -13   0    5.00   10.70
  -5 -13   0   18.60    6.90
   5 -13   0    6.80    7.30
  -5 -13   0   13.50    6.10
  -5 -13   0    6.30    6.90
  -5 -13   0   12.40   10.40
   5 -13   0   13.90   10.10
   5 -13   0   16.40    6.10
   5 -13   0    8.80   11.00
  -5  13   0   22.60    5.40
   5  13   0   14.60    6.30
   5  13   0    5.50    5.70
  -5  13   0   11.20    6.10
  -5  13   0   17.70    8.10
   5  13   0    4.30    8.20
   5  13   0   12.20   13.40
  -5  13   0    6.80   10.50
  -5  13   0   19.30    9.20
   5  13   0   18.10    5.20
  -6 -13   0    5.00   15.60
   6 -13   0    6.40   12.00
  -6 -13   0    3.50    5.80
  -6 -13   0    4.80    3.80
  -6 -13   0   -0.10    5.10
   6 -13   0    2.90    5.90
  -6 -13   0   -0.70   10.60
   6 -13   0   -4.50    6.30
   6 -13   0   10.70    9.80
   6 -13   0    1.80    8.50
  -6  13   0    6.30   10.50
   6  13   0    4.10    8.30
   6  13   0    1.10    4.60
   6  13   0   -9.80    5.70
   6  13   0  -13.40    6.90
   6  13   0    5.20   13.10
  -6  13   0   -1.30    6.90
  -6  13   0   -1.60    7.80
  -6  13   0    0.00    4.40
  -6  13   0    1.10    4.20
  -7 -13   0    0.10   11.80
   7 -13   0   -5.50    8.20
  -7 -13   0    0.50    6.50
   7 -13   0  -16.70   12.30
  -7 -13   0    7.20    8.40
   7 -13   0    7.30   14.00
  -7 -13   0   -4.90   14.20
  -7 -13   0    2.20    8.00
   7 -13   0  -10.30    6.90
   7  13   0   -6.60    6.40
  -7  13   0   -9.40    7.90
   7  13   0   -4.10    7.40
  -7  13   0    7.00    8.50
   7  13   0    2.20    7.90
  -7  13   0   -3.30    4.70
  -7  13   0    0.10    5.60
   7  13   0   -6.60    4.50
  -7  13   0    2.00   10.90
  -8 -13   0   10.60   12.40
  -8 -13   0    0.10    5.20
   8 -13   0   13.00   10.40
   8 -13   0   -6.40    4.20
  -8 -13   0    8.10    8.60
  -8 -13   0    0.70    6.00
   8 -13   0   -5.10    9.00
  -8 -13   0   -4.20    9.90
   8 -13   0    0.80    7.80
   8 -13   0   -3.70   15.50
  -8  13   0   -1.30    5.00
  -8  13   0    3.90    5.50
   8  13   0    2.30    5.00
  -8  13   0   -6.50    6.90
   8  13   0  -11.60    4.40
  -8  13   0    2.40    7.20
   8  13   0  -13.20   14.20
   8  13   0    6.70    7.80
  -8  13   0    3.30   12.00
   8  13   0   -0.20    7.40
   9 -13   0   84.59   14.10
  -9 -13   0   74.19   19.70
   9 -13   0   79.29   17.80
   9 -13   0   82.89   19.20
  -9 -13   0   78.49   11.60
   9 -13   0   57.69   11.30
  -9 -13   0   85.39   13.00
   9 -13   0   63.89   12.40
  -9 -13   0   90.29   17.60
   9 -13   0   63.49   10.20
  -9 -13   0   93.99   14.70
   9 -13   0   64.69   11.70
  -9  13   0   69.89   14.30
   9  13   0   83.19   15.20
   9  13   0   80.79   25.20
  -9  13   0   75.59   12.80
   9  13   0   82.69   11.10
   9  13   0   70.39   10.30
   9  13   0   43.70   10.10
   9  13   0   51.29    8.70
  -9  13   0   65.19   13.20
  -9  13   0   46.20    9.10
  -9  13   0   69.99   20.10
  10 -13   0   31.60   16.50
  10 -13   0   23.70   20.10
  10 -13   0   12.20    8.00
  10 -13   0   20.80    9.10
 -10 -13   0   14.80   10.80
 -10 -13   0   -0.60   12.70
 -10 -13   0    3.00    8.10
  10 -13   0   22.70    6.90
  10 -13   0   32.50    8.40
 -10 -13   0   29.80   11.00
  10 -13   0   26.90    8.90
 -10 -13   0    4.70    5.70
 -10  13   0   11.50   11.30
  10  13   0   11.60    5.80
 -10  13   0   11.40    9.00
  10  13   0   10.00   10.00
 -10  13   0    8.50    6.70
  10  13   0   11.10    8.80
 -10  13   0    9.90    8.90
 -10  13   0   30.60    9.00
  10  13   0   28.10   23.00
  10  13   0   14.40    8.30
  10  13   0   14.40    7.00
  11 -13   0   22.60    7.20
 -11 -13   0   24.90   14.80
  11 -13   0   38.80   18.30
  11 -13   0   14.90   10.30
 -11 -13   0    4.70   16.10
 -11 -13   0   -2.30    7.50
 -11 -13   0   15.20   10.60
  11 -13   0   10.30    9.90
  11 -13   0   21.40   15.70
 -11 -13   0   24.70   10.90
  11 -13   0   21.60   10.10
  11  13   0   25.10    7.80
  11  13   0   21.60    6.40
  11  13   0   28.20   14.40
  11  13   0   33.80   13.60
 -11  13   0   36.80   17.40
 -11  13   0    9.30   10.50
  11  13   0   25.80   25.30
  11  13   0    9.60    9.60
 -11  13   0   32.10    9.90
 -11  13   0   32.70   13.10
  11  13   0   27.70    8.10
 -11  13   0   -2.30   10.90
  12 -13   0   17.00   15.70
  12 -13   0  -12.70   22.10
  12 -13   0   21.90   12.20
 -12 -13   0   -4.90    5.40
 -12 -13   0  -10.50   12.90
 -12 -13   0    2.30   10.20
 -12 -13   0   16.40   10.80
  12 -13   0    4.40    7.30
  12 -13   0    6.50    9.30
  12 -13   0   -3.50    8.60
 -12 -13   0   -9.60    8.90
 -12  13   0   29.00   15.20
  12  13   0  -12.50    7.80
  12  13   0    2.70   10.40
  12  13   0   20.10   14.90
 -12  13   0    2.50    6.20
 -12  13   0    9.70    7.40
  12  13   0    7.40    6.50
  12  13   0    6.10    9.70
  12  13   0   16.90   24.70
  12  13   0    4.40    4.90
 -12  13   0   17.30   12.30
 -12  13   0   11.60   10.60
  13 -13   0    0.60   25.70
  13 -13   0   -7.00   10.40
  13 -13   0   -5.00    9.10
 -13 -13   0   41.80   26.60
 -13 -13   0   24.40   13.00
  13 -13   0   13.60    9.90
  13 -13   0    4.30   10.00
 -13 -13   0   30.90   15.60
 -13 -13   0    7.60    7.50
  13 -13   0   11.70   16.10
 -13 -13   0   25.70   12.60
  13  13   0   17.70   28.60
  13  13   0    9.40    6.40
 -13  13   0   33.80   16.40
 -13  13   0   15.00    8.70
  13  13   0   17.60   12.50
  13  13   0   11.80    6.10
  13  13   0   34.90   13.40
 -13  13   0    0.10   11.80
  13  13   0   37.70   16.10
  13  13   0    8.30    9.90
 -13  13   0   16.00    9.70
 -13  13   0   14.40    6.30
   0 -14   0  359.76   20.90
   0 -14   0  327.67   21.70
   0 -14   0  357.36   20.10
   0 -14   0  317.57   23.40
   0 -14   0  350.86   29.60
   0  14   0  372.36   20.50
   0  14   0  343.97   15.70
   0  14   0  387.36   29.30
   0  14   0  392.86   23.70
   0  14   0  352.66   20.90
   1 -14   0    8.10    7.70
  -1 -14   0    7.20    5.50
   1 -14   0    9.20   13.00
   1 -14   0    3.20    8.40
  -1 -14   0    8.00    7.50
  -1 -14   0   -2.90    9.80
   1 -14   0   -2.50    4.70
   1 -14   0    9.20    6.90
  -1 -14   0    3.70    5.40
  -1 -14   0    2.70    9.60
   1  14   0    2.40    7.20
  -1  14   0   -2.90   10.20
  -1  14   0    0.50    7.60
   1  14   0   12.50   10.40
  -1  14   0    9.50    4.30
  -1  14   0   19.80    8.00
   1  14   0    2.80    7.30
  -1  14   0    3.10    4.80
  -1  14   0   -1.70   10.70
   1  14   0    2.60    3.30
   1  14   0  -10.10   13.50
   2 -14   0  108.09   11.20
   2 -14   0  114.79   17.40
  -2 -14   0  125.39   10.20
   2 -14   0  117.09   17.10
  -2 -14   0  111.49   11.60
  -2 -14   0   99.19   16.50
   2 -14   0  119.49   14.50
  -2 -14   0  113.89   13.80
  -2 -14   0  113.49   14.50
  -2 -14   0   90.89   12.50
   2 -14   0  111.89   11.30
   2  14   0  100.49   17.30
   2  14   0  129.19   16.40
  -2  14   0   97.69    9.10
  -2  14   0  125.79   16.80
  -2  14   0  119.49   16.90
   2  14   0  119.69   11.60
  -2  14   0  121.09   13.70
   2  14   0  115.59    9.50
  -2  14   0   90.49   13.10
  -2  14   0  111.39    8.60
  -2  14   0  110.69   11.40
   2  14   0  102.09   12.60
   3 -14   0   19.50   12.20
  -3 -14   0    5.20    3.90
   3 -14   0   15.60    9.60
  -3 -14   0    8.10    7.50
  -3 -14   0    8.60    7.50
   3 -14   0    2.40    8.00
  -3 -14   0   18.20    8.10
  -3 -14   0    5.20    8.70
  -3 -14   0    2.80   16.00
  -3 -14   0   17.80    8.10
   3 -14   0    6.20    4.80
   3 -14   0   12.40    5.80
   3  14   0   22.00   10.60
  -3  14   0    7.90    3.50
  -3  14   0   19.20   10.00
  -3  14   0   16.70    7.60
   3  14   0   14.20    5.50
  -3  14   0   12.20    6.10
  -3  14   0    1.00    4.00
   3  14   0    4.90    5.50
   3  14   0   12.60   16.60
  -3  14   0   17.50    8.60
  -3  14   0    8.90    7.50
   3  14   0   13.70    7.70
   4 -14   0   22.70    9.30
  -4 -14   0   29.20   11.00
   4 -14   0   25.00   11.00
  -4 -14   0   18.50    5.30
  -4 -14   0   30.60    9.30
  -4 -14   0   20.30    8.30
   4 -14   0   21.70   14.10
  -4 -14   0   24.00    9.30
  -4 -14   0   29.60    9.00
   4 -14   0   17.80    8.20
  -4 -14   0   17.70   16.60
   4 -14   0   20.10    7.70
  -4  14   0   16.10    9.70
  -4  14   0   16.20    8.80
   4  14   0   30.40   10.50
   4  14   0   27.80   13.90
  -4  14   0   16.80    8.60
   4  14   0   26.10    6.40
   4  14   0   20.40    8.30
  -4  14   0   18.80    6.50
   4  14   0   32.70    8.80
  -4  14   0   15.60    5.20
  -4  14   0   20.60    6.80
  -5 -14   0    3.30    7.90
  -5 -14   0   -3.60    6.50
   5 -14   0    2.00   10.00
   5 -14   0    8.60    7.20
  -5 -14   0    9.90   11.80
   5 -14   0   -8.90   13.40
  -5 -14   0    2.00   10.00
  -5 -14   0    2.60    5.50
  -5 -14   0    5.50    7.80
   5 -14   0  -12.30    6.90
   5 -14   0   -2.70    9.50
   5  14   0    1.60    8.70
  -5  14   0    7.90    5.00
   5  14   0   -6.50    7.40
   5  14   0    2.30    7.30
   5  14   0   -3.70   13.20
  -5  14   0    1.10   10.20
  -5  14   0    3.00   11.50
  -5  14   0   -4.70    6.80
  -5  14   0   -5.40    5.10
   5  14   0   -1.60    3.90
   6 -14   0   46.30   11.10
  -6 -14   0   22.90    9.50
  -6 -14   0   35.80   10.70
   6 -14   0   26.30    6.80
  -6 -14   0   45.50   13.90
   6 -14   0   23.30   12.00
  -6 -14   0   14.70   17.40
   6 -14   0   11.70   10.20
   6 -14   0   43.00   14.80
  -6 -14   0   34.20    8.10
   6  14   0   28.60    6.80
   6  14   0   31.70    8.80
  -6  14   0   30.90   13.90
   6  14   0   21.80    9.20
  -6  14   0   29.80   14.90
   6  14   0   33.40   10.30
  -6  14   0   32.10    5.90
  -6  14   0   27.70   10.30
  -6  14   0   25.10    8.70
   6  14   0   43.40   21.00
  -7 -14   0   79.19   12.90
  -7 -14   0   55.89    8.40
  -7 -14   0   68.09   13.00
   7 -14   0   54.69   10.80
   7 -14   0   67.59   12.80
  -7 -14   0   68.49   11.80
  -7 -14   0   70.89   16.30
   7 -14   0   73.69   19.80
   7 -14   0   67.49   12.40
   7 -14   0   62.89   17.20
   7  14   0   47.20   10.70
   7  14   0   82.49   23.00
  -7  14   0   55.49   10.40
  -7  14   0   63.19    9.00
  -7  14   0   73.89   16.70
   7  14   0   65.49    9.20
   7  14   0   58.09   11.30
  -7  14   0   56.19   11.80
   7  14   0   68.19   11.70
  -7  14   0   64.09   12.90
  -8 -14   0   23.40   15.90
   8 -14   0   17.50   11.20
  -8 -14   0   15.70   10.20
  -8 -14   0   14.60   12.90
   8 -14   0   18.60    9.00
   8 -14   0   19.60   21.20
  -8 -14   0   26.30   10.60
  -8 -14   0   13.40    8.60
   8 -14   0    3.90    7.60
   8  14   0   39.60   23.00
  -8  14   0   22.50    9.80
   8  14   0   12.70    9.70
  -8  14   0   20.20   11.40
  -8  14   0   10.90    6.80
   8  14   0   12.00    5.80
   8  14   0   11.30    6.40
  -8  14   0   16.70    7.00
   8  14   0    9.60    8.20
  -8  14   0   34.00   15.60
  -9 -14   0   50.09   15.90
   9 -14   0   22.90    8.60
   9 -14   0   40.20   11.20
  -9 -14   0   29.70    8.90
   9 -14   0   64.99   17.10
   9 -14   0   35.10   28.60
   9 -14   0   51.79   11.00
  -9 -14   0   28.10    8.80
  -9 -14   0   41.20   11.70
   9  14   0   19.70    6.60
  -9  14   0   30.60   12.40
  -9  14   0   27.90    7.50
   9  14   0   38.90   12.50
  -9  14   0   43.90   11.50
   9  14   0   25.50    8.80
   9  14   0   47.40   10.60
  -9  14   0   42.20   11.30
  -9  14   0   37.20   13.80
   9  14   0   25.00   23.50
  10 -14   0   33.90    8.40
 -10 -14   0   21.20    8.00
  10 -14   0   41.80    9.90
  10 -14   0   18.00    8.30
  10 -14   0   23.20   16.10
 -10 -14   0   19.50   12.80
  10 -14   0   31.10   10.30
 -10 -14   0   31.50    8.10
 -10 -14   0   23.80   14.80
 -10 -14   0    6.90    7.00
  10 -14   0   36.70   21.70
  10  14   0   21.60   11.90
  10  14   0   18.50    9.40
 -10  14   0   18.70   11.40
 -10  14   0   25.80   10.20
  10  14   0   59.99   24.30
 -10  14   0   29.20    6.70
  10  14   0   31.90    7.30
  10  14   0   12.70    6.60
 -10  14   0    9.00   11.70
  10  14   0   25.70    8.90
  11 -14   0   44.20    9.80
  11 -14   0   37.20   19.00
  11 -14   0   35.80    8.20
 -11 -14   0   30.40   10.80
 -11 -14   0   22.20    8.90
  11 -14   0   20.00   10.00
 -11 -14   0   13.90   16.80
  11 -14   0   33.70   11.60
 -11 -14   0   41.80   16.50
  11 -14   0   36.80   17.10
 -11 -14   0   26.00   10.40
 -11  14   0   23.70    7.50
 -11  14   0   32.60   12.00
  11  14   0   37.20   10.40
 -11  14   0   72.29   20.20
  11  14   0   49.70   26.60
  11  14   0   34.40   10.30
  11  14   0   31.00   10.50
  11  14   0   41.10    7.90
 -11  14   0   30.20   14.00
  11  14   0   18.20   10.40
 -11  14   0   30.50   11.20
 -12 -14   0   -6.20    8.40
  12 -14   0   15.90    7.10
 -12 -14   0   11.60   13.40
  12 -14   0    0.00    8.90
  12 -14   0    2.50    7.80
  12 -14   0    3.90   15.50
 -12 -14   0   -7.10    6.60
 -12 -14   0    3.70   15.50
  12 -14   0    3.90    9.10
  12 -14   0    2.20   23.40
 -12 -14   0    6.30    8.60
  12  14   0  -17.10    8.00
  12  14   0    7.60    7.20
  12  14   0   27.40    7.90
  12  14   0    8.90    6.90
  12  14   0   -0.60    4.30
 -12  14   0    4.60    9.90
 -12  14   0   -3.00    4.40
 -12  14   0   -4.80    9.30
 -12  14   0   -6.00    7.20
  12  14   0   -7.10   25.70
 -13 -14   0   38.00   15.60
  13 -14   0   -1.80   28.20
 -13 -14   0    4.90    8.70
 -13 -14   0    9.80    9.40
 -13 -14   0   -5.70    9.40
  13 -14   0   -7.30    7.90
  13 -14   0    8.60   15.80
  13 -14   0    5.80    9.30
 -13 -14   0   -5.50   10.50
  13 -14   0  -15.90    9.50
  13 -14   0   -0.80    7.90
  13  14   0    0.10    6.80
 -13  14   0   -0.10    7.20
  13  14   0   -5.70   11.10
  13  14   0    5.40    7.80
 -13  14   0    5.90   11.40
  13  14   0  -10.60    7.50
 -13  14   0   -1.70   13.00
  13  14   0   -7.60   33.40
  13  14   0    2.30    6.10
 -13  14   0  -18.40   10.20
   0 -15   0    5.80    5.40
   0 -15   0    7.70    7.40
   0 -15   0    9.40    7.50
   0 -15   0    2.30    7.70
   0 -15   0   -1.10   10.40
   0  15   0   -2.50    7.70
   0  15   0  -12.20   12.80
   0  15   0   -5.10    3.50
   0  15   0   12.10    7.70
   0  15   0   -3.70    4.80
   1 -15   0  201.38   21.30
  -1 -15   0  215.78   15.80
   1 -15   0  186.58   14.90
   1 -15   0  203.08   16.60
  -1 -15   0  200.08   16.70
   1 -15   0  254.47   26.40
  -1 -15   0  185.38   16.60
  -1 -15   0  199.28   19.30
   1 -15   0  204.08   17.70
  -1 -15   0  208.98   27.70
   1  15   0  189.38   15.10
  -1  15   0  199.28   16.80
  -1  15   0  192.68   19.60
  -1  15   0  207.98   12.00
   1  15   0  203.38   19.70
   1  15   0  211.78   22.40
   1  15   0  191.08   11.90
  -1  15   0  184.28   18.50
  -1  15   0  190.08   15.30
   1  15   0  212.78   17.00
  -1  15   0  202.48   17.20
   2 -15   0   11.80   12.60
  -2 -15   0   -8.70    9.20
   2 -15   0   -5.10   12.60
  -2 -15   0    6.00    7.60
  -2 -15   0    5.40    3.40
  -2 -15   0   -1.70    4.90
  -2 -15   0   13.90   16.60
   2 -15   0    6.90    8.00
   2 -15   0   -1.70    5.00
  -2 -15   0   -2.20    6.40
   2 -15   0   -5.00    4.80
  -2  15   0    7.70    4.60
  -2  15   0   -2.80    7.80
   2  15   0   -8.40   10.70
   2  15   0   -0.30    7.20
  -2  15   0   -3.10    3.80
  -2  15   0   -0.10    8.20
   2  15   0   21.50   11.20
   2  15   0   -7.80    4.50
  -2  15   0    3.70    5.40
  -2  15   0   -5.00   10.80
   2  15   0   -4.70    4.90
  -2  15   0    7.40    5.80
  -3 -15   0  147.09   16.50
  -3 -15   0  171.28   15.40
  -3 -15   0  166.88   22.90
  -3 -15   0  157.98   15.90
   3 -15   0  123.99   16.70
   3 -15   0  167.58   14.10
   3 -15   0  156.58   13.30
   3 -15   0  136.39   17.40
  -3 -15   0  146.99   15.00
  -3 -15   0  150.18   15.40
  -3 -15   0  162.68   12.30
   3 -15   0  135.89   18.00
  -3  15   0  167.48   15.50
  -3  15   0  173.28   19.40
   3  15   0  154.18   17.40
   3  15   0  169.18   25.50
  -3  15   0  157.78   14.20
   3  15   0  146.79   13.50
  -3  15   0  154.18   18.10
  -3  15   0  142.99   19.40
  -3  15   0  164.28   11.60
   3  15   0  175.08   11.90
   3  15   0  152.88   13.50
  -3  15   0  142.59   10.40
  -4 -15   0    9.00    8.00
   4 -15   0    4.10    5.40
   4 -15   0    1.80   11.10
  -4 -15   0   -4.10    9.10
   4 -15   0    2.10    5.00
  -4 -15   0   22.90   16.60
  -4 -15   0    7.00    5.90
  -4 -15   0    2.20    5.40
  -4 -15   0    5.60    5.70
  -4 -15   0    7.10    8.20
   4 -15   0    1.20   13.40
   4 -15   0    2.50    9.40
   4  15   0    5.50   10.20
  -4  15   0    3.00    5.90
  -4  15   0   -0.10    8.00
  -4  15   0    5.50    9.90
   4  15   0    7.70    5.70
  -4  15   0    4.00    4.60
  -4  15   0   10.90   10.20
  -4  15   0    8.10    5.00
   4  15   0   -0.90   12.20
   4  15   0   12.30    5.80
  -4  15   0    4.80    5.70
   4  15   0   19.90    8.60
  -5 -15   0   78.19   12.40
  -5 -15   0   85.09   17.50
  -5 -15   0   77.49   13.50
  -5 -15   0   88.99   16.20
   5 -15   0  107.19   19.10
   5 -15   0   60.29   14.10
   5 -15   0   56.29    9.70
   5 -15   0  100.69   18.60
   5 -15   0  104.49   14.10
  -5 -15   0   90.49   12.30
  -5 -15   0  108.09   14.50
  -5 -15   0   96.59    9.60
   5  15   0  110.29   25.00
  -5  15   0  109.19   16.00
  -5  15   0   93.19   19.90
   5  15   0   92.79   12.80
  -5  15   0  104.69   18.60
  -5  15   0   91.69   12.90
   5  15   0   92.29   13.10
   5  15   0   90.59   13.50
   5  15   0   96.49    9.60
  -5  15   0   75.29    9.00
  -5  15   0   80.69   13.70
  -6 -15   0    8.50    7.80
  -6 -15   0   11.80   11.90
   6 -15   0   13.70    8.30
  -6 -15   0   14.00    7.30
  -6 -15   0   20.60    6.00
   6 -15   0   10.50    8.80
   6 -15   0   13.70   14.80
   6 -15   0   16.40   14.00
  -6 -15   0   13.50   17.10
   6 -15   0   12.50   10.70
   6  15   0   31.30   16.50
  -6  15   0    3.20    8.70
  -6  15   0   11.30    9.10
   6  15   0   11.50    5.60
  -6  15   0    8.10    9.60
  -6  15   0    2.50    6.50
   6  15   0   15.20   10.20
  -6  15   0    1.70    5.20
   6  15   0   -4.40    7.30
   6  15   0    0.90    9.00
   7 -15   0   17.10    8.30
   7 -15   0   45.20   17.10
  -7 -15   0   28.80   12.70
   7 -15   0   16.80   15.00
  -7 -15   0   19.70    7.90
   7 -15   0   29.80   12.20
  -7 -15   0   29.70    8.50
  -7 -15   0   16.80   13.00
  -7 -15   0    1.80    9.10
   7 -15   0   20.50    7.20
  -7  15   0    8.00    7.40
   7  15   0   31.90    7.40
   7  15   0   16.20    9.40
  -7  15   0   29.60   10.70
   7  15   0   19.30    6.90
   7  15   0   26.70    9.90
  -7  15   0   27.50   10.20
  -7  15   0   30.90   14.70
  -7  15   0   24.40    6.60
   7  15   0   26.30   16.50
  -8 -15   0   70.89   31.90
   8 -15   0   64.29   13.00
  -8 -15   0   60.09   16.10
   8 -15   0   44.40   11.00
  -8 -15   0   33.20   11.70
  -8 -15   0   38.70    7.70
  -8 -15   0   62.29   11.80
   8 -15   0   50.59   21.20
   8 -15   0   25.10    9.40
   8 -15   0   67.09   20.40
   8  15   0   22.40   22.90
   8  15   0   35.20   12.10
  -8  15   0   52.69   12.60
   8  15   0   38.80   10.10
   8  15   0   36.70   10.10
  -8  15   0   34.70   16.60
  -8  15   0   56.59   14.20
  -8  15   0   69.49   12.10
   8  15   0   58.59   10.50
  -8  15   0   48.10    8.20
   9 -15   0   18.20    9.00
  -9 -15   0   22.80    7.10
   9 -15   0   44.90   11.40
   9 -15   0   18.60   11.00
  -9 -15   0   17.30   10.10
  -9 -15   0   12.50   10.70
   9 -15   0   20.50   15.50
   9 -15   0    3.00    5.80
   9 -15   0   27.20   14.00
  -9 -15   0   11.20    7.90
  -9 -15   0   22.70   12.80
   9  15   0   10.50    7.20
   9  15   0   12.00   10.20
  -9  15   0    9.20    8.90
   9  15   0   -3.00   22.20
  -9  15   0   18.60   10.90
  -9  15   0   32.50   10.90
   9  15   0   31.80    8.60
  -9  15   0   30.70   15.10
   9  15   0   29.80    9.70
  -9  15   0    9.70    6.60
  10 -15   0   24.90   16.50
  10 -15   0   39.90   10.70
 -10 -15   0   58.49   12.30
 -10 -15   0   33.80   15.30
  10 -15   0   76.59   24.30
 -10 -15   0   59.29   12.90
  10 -15   0   53.69   12.10
 -10 -15   0   38.70    9.60
 -10 -15   0   50.39   18.50
  10  15   0   37.10   10.60
  10  15   0   54.89   10.30
  10  15   0   58.39   13.80
 -10  15   0   52.69   13.00
 -10  15   0   66.39   14.30
  10  15   0   60.09   12.70
 -10  15   0   50.79   14.30
 -10  15   0   42.20    8.60
  10  15   0   35.20    7.90
  10  15   0   55.29   20.50
 -11 -15   0  -12.20   12.10
 -11 -15   0    6.10   11.00
 -11 -15   0   -5.40   11.60
  11 -15   0   -0.40   10.40
  11 -15   0   12.40   19.60
  11 -15   0   -5.30    8.50
 -11 -15   0   14.40    8.60
 -11 -15   0    8.50    6.40
  11 -15   0   -3.40    5.70
  11  15   0    7.70    7.50
  11  15   0    1.20    9.60
  11  15   0   -2.40    9.50
  11  15   0   -2.10    8.10
 -11  15   0   -7.90    7.80
 -11  15   0    5.50    7.10
 -11  15   0   17.80    8.40
 -11  15   0   13.60   11.70
 -11  15   0   -0.50    7.10
  11  15   0   25.80   19.20
  11  15   0    7.10    5.70
 -12 -15   0    3.80   14.80
  12 -15   0   13.90    9.00
 -12 -15   0    3.90   13.10
  12 -15   0    6.80    5.20
 -12 -15   0    3.50    6.80
 -12 -15   0   26.00   10.00
  12 -15   0    6.20   10.10
  12 -15   0    9.80   10.60
  12 -15   0   21.80   18.50
  12 -15   0    6.00    7.90
 -12 -15   0   25.30   12.20
  12  15   0   17.20    8.60
  12  15   0   -7.20   17.70
 -12  15   0   12.20   10.90
  12  15   0   13.70    8.40
 -12  15   0    2.40   11.80
 -12  15   0   17.10   10.00
  12  15   0   -3.60    5.90
 -12  15   0   11.90    7.90
  12  15   0    5.20    6.40
  12  15   0   23.20   12.70
   0 -16   0   99.29   12.90
   0 -16   0   96.69   13.30
   0 -16   0   92.59   12.00
   0 -16   0   91.19   16.00
   0 -16   0   89.29   19.30
   0  16   0  130.79   16.90
   0  16   0  102.39   14.00
   0  16   0   89.99   16.20
   0  16   0   81.99   10.90
   0  16   0  101.09    8.80
  -1 -16   0   -5.10    9.90
   1 -16   0   21.20   11.50
   1 -16   0   12.30    7.40
   1 -16   0    8.00    8.20
   1 -16   0   17.50    9.50
  -1 -16   0    6.40    5.60
  -1 -16   0   19.70    8.40
  -1 -16   0   17.30    8.60
   1 -16   0   21.40   12.50
  -1 -16   0   -3.10   11.40
   1  16   0    8.20    8.40
  -1  16   0   15.10   13.50
   1  16   0   19.80    9.00
   1  16   0   11.30    5.30
  -1  16   0   29.70    9.50
  -1  16   0   21.10    8.60
  -1  16   0    6.90   11.60
  -1  16   0   14.60    4.20
   1  16   0   10.30    6.50
   1  16   0    1.00   14.70
   2 -16   0  270.47   19.60
   2 -16   0  240.98   20.90
  -2 -16   0  232.88   19.10
  -2 -16   0  250.87   15.20
   2 -16   0  218.08   23.30
   2 -16   0  231.18   27.10
  -2 -16   0  212.18   17.00
   2 -16   0  217.98   17.00
  -2 -16   0  257.37   19.20
  -2 -16   0  222.78   18.50
  -2 -16   0  262.47   31.10
  -2  16   0  261.67   18.50
  -2  16   0  242.18   13.70
  -2  16   0  227.58   22.00
   2  16   0  318.27   32.00
   2  16   0  288.97   21.80
   2  16   0  265.17   19.70
  -2  16   0  248.58   17.90
  -2  16   0  262.97   14.80
   2  16   0  259.87   14.60
   2  16   0  282.47   19.80
  -2  16   0  240.88   24.70
  -2  16   0  266.57   20.10
   3 -16   0    3.80    9.10
   3 -16   0   -0.90    4.90
  -3 -16   0   -6.50    4.90
  -3 -16   0   -3.60    9.00
   3 -16   0    1.30    9.80
  -3 -16   0   -5.70    8.00
   3 -16   0    5.20    8.10
  -3 -16   0    4.10   12.20
  -3 -16   0  -11.20    7.20
   3 -16   0   -7.80    5.30
  -3 -16   0   -1.30    8.60
  -3 -16   0   -5.00    7.70
   3  16   0    9.30   13.10
  -3  16   0   -7.60   10.60
  -3  16   0    1.00    4.30
  -3  16   0   -3.60    3.10
   3  16   0    2.70    3.80
  -3  16   0   -9.50    7.20
   3  16   0    1.80    5.90
   3  16   0   -2.70    7.60
  -3  16   0  -11.20    8.60
  -3  16   0   -5.10   11.30
   3  16   0   -6.70    4.70
  -3  16   0  -12.30    4.20
   4 -16   0  284.47   26.70
  -4 -16   0  266.87   16.00
   4 -16   0  319.47   20.30
   4 -16   0  308.87   26.90
  -4 -16   0  280.17   22.20
  -4 -16   0  271.17   22.40
  -4 -16   0  275.57   20.70
   4 -16   0  259.27   18.90
   4 -16   0  310.37   25.60
  -4 -16   0  283.67   19.90
  -4 -16   0  357.16   35.10
  -4 -16   0  293.07   21.60
  -4  16   0  297.57   15.80
   4  16   0  239.98   40.80
   4  16   0  259.17   19.20
  -4  16   0  292.37   16.30
   4  16   0  297.27   16.90
   4  16   0  292.37   22.20
   4  16   0  289.37   19.90
  -4  16   0  242.18   23.40
  -4  16   0  291.57   21.10
  -4  16   0  327.57   25.80
  -4  16   0  309.17   22.10
  -5 -16   0   46.70    9.80
  -5 -16   0   41.90   12.50
  -5 -16   0   48.10   13.40
  -5 -16   0   23.40   14.10
  -5 -16   0   45.00   11.00
   5 -16   0   38.20   12.70
   5 -16   0   24.10    9.20
  -5 -16   0   46.50    9.10
   5 -16   0   40.90    9.70
  -5 -16   0   37.00    9.30
   5 -16   0   35.30   13.40
   5 -16   0   44.70   15.10
  -5  16   0   45.30   14.60
  -5  16   0   36.30    9.40
  -5  16   0   56.29    8.40
   5  16   0   46.30   22.60
   5  16   0   37.70    8.50
  -5  16   0   55.99   16.30
   5  16   0   35.40    7.30
  -5  16   0   48.90   13.10
   5  16   0   48.00    9.90
   5  16   0   57.19   12.50
  -5  16   0   43.50   11.50
   6 -16   0  168.78   22.20
  -6 -16   0  151.68   14.30
   6 -16   0  131.49   19.90
  -6 -16   0  159.88   16.70
  -6 -16   0  154.28   18.20
   6 -16   0  173.08   22.60
  -6 -16   0  143.29   17.30
  -6 -16   0  161.18   19.20
  -6 -16   0  137.19   24.20
   6 -16   0  151.68   15.60
   6 -16   0  158.48   16.70
   6  16   0  162.78   12.60
  -6  16   0  140.89   11.90
  -6  16   0  165.18   17.20
  -6  16   0  156.48   22.50
  -6  16   0  124.39   14.70
   6  16   0  163.28   18.70
   6  16   0  153.28   16.60
  -6  16   0  174.18   20.40
   6  16   0  140.09   23.50
  -7 -16   0   77.89   12.90
  -7 -16   0   89.99   31.10
  -7 -16   0   82.69   13.90
   7 -16   0   53.49   10.70
  -7 -16   0   87.79   16.50
   7 -16   0  115.99   21.30
   7 -16   0  121.69   31.00
   7 -16   0   79.29   13.70
   7 -16   0   87.99   14.80
  -7  16   0   70.09   12.90
   7  16   0   92.19   21.10
   7  16   0   90.59   10.50
  -7  16   0   64.39   13.90
  -7  16   0   87.39   18.90
  -7  16   0   66.49   13.40
   7  16   0   97.19   14.30
  -7  16   0   73.49    9.70
   7  16   0   87.59   12.80
   7  16   0   45.20   10.50
   8 -16   0   38.00   10.50
   8 -16   0   37.40   18.50
  -8 -16   0   31.80   13.80
  -8 -16   0   27.70    8.70
  -8 -16   0   36.70    9.30
  -8 -16   0   12.50   16.50
   8 -16   0   17.50    6.70
   8 -16   0   25.00   10.50
   8 -16   0   35.40   13.20
  -8 -16   0   32.50   11.00
  -8  16   0   39.50   13.20
  -8  16   0   28.60    9.70
   8  16   0   24.70   11.80
   8  16   0   28.50    9.00
   8  16   0   75.29   24.80
  -8  16   0   30.40   17.10
   8  16   0   22.60    8.40
  -8  16   0   32.10    7.50
   8  16   0   10.20    6.70
  -8  16   0   37.70   11.30
  -9 -16   0   25.60   13.40
  -9 -16   0   51.69   10.10
   9 -16   0   33.60   16.70
  -9 -16   0   28.30   10.80
  -9 -16   0   22.50    8.20
   9 -16   0   53.69   12.30
   9 -16   0   37.80   10.10
   9 -16   0   43.10   10.90
  -9 -16   0   41.40   14.80
   9 -16   0   48.60   21.10
  -9  16   0   42.50   11.70
  -9  16   0   43.60   19.40
   9  16   0   35.60   10.20
  -9  16   0   43.00    7.70
   9  16   0   37.20   11.40
   9  16   0   66.59   13.90
   9  16   0   73.69   26.90
  -9  16   0   42.30   10.20
  -9  16   0   48.00   11.30
 -10 -16   0   46.20   10.30
 -10 -16   0   17.70   13.00
  10 -16   0    6.90    7.90
  10 -16   0   -3.80    9.80
  10 -16   0   37.90   21.40
  10 -16   0   15.00   12.10
  10 -16   0    7.40   10.20
 -10 -16   0   -3.10    9.50
 -10 -16   0    6.70   15.60
 -10 -16   0    9.10    6.70
 -10  16   0   25.90   11.90
  10  16   0   12.70    6.60
  10  16   0   14.50    8.60
  10  16   0   19.40   19.50
 -10  16   0   23.80    9.20
  10  16   0   11.50    6.50
 -10  16   0   23.70   16.90
  10  16   0    7.70    9.80
 -10  16   0   -1.10    9.80
  10  16   0    0.00   10.20
 -10  16   0   10.50    7.20
 -11 -16   0    4.30   13.30
  11 -16   0   13.80   10.50
 -11 -16   0    1.10   10.90
 -11 -16   0    3.80   10.70
 -11 -16   0   15.50    7.70
  11 -16   0   18.00   12.90
  11 -16   0   20.00   22.60
  11 -16   0   12.70    8.60
 -11 -16   0    9.40    6.70
 -11  16   0    2.80    7.20
  11  16   0   21.20    9.80
  11  16   0    2.90    7.70
 -11  16   0    8.60   12.00
 -11  16   0   39.30   18.00
 -11  16   0    8.90    7.00
  11  16   0   -6.40   19.60
 -11  16   0    0.80    9.50
  11  16   0   -2.70   10.20
  11  16   0   14.70    8.20
  11  16   0    6.10    6.60
 -12 -16   0   26.50   10.70
  12 -16   0   15.00   10.90
 -12 -16   0   31.80   16.20
  12 -16   0   11.50    9.60
  12 -16   0   30.10   13.90
 -12 -16   0    5.60   12.60
 -12 -16   0   16.70   12.00
 -12 -16   0   15.70   12.50
  12 -16   0   21.10   19.50
  12  16   0    9.10   11.50
  12  16   0   10.20    8.90
  12  16   0  -33.70   21.60
 -12  16   0   38.00   13.40
  12  16   0   18.40    7.50
 -12  16   0   17.90    7.70
 -12  16   0   44.50   14.30
  12  16   0   19.40   11.90
 -12  16   0   12.00   16.70
 -12  16   0    6.60   15.70
  12  16   0   10.80    7.40
   0 -17   0    4.60   12.00
   0 -17   0    8.50    6.20
   0 -17   0    6.10   15.50
   0 -17   0    5.10    7.70
   0 -17   0    5.20    8.10
   0  17   0    1.10    8.40
   0  17   0  -10.20   13.50
   0  17   0    1.80    4.20
   0  17   0   -4.30    4.90
   0  17   0   18.30   13.10
  -1 -17   0  115.09   15.10
  -1 -17   0  109.09   14.50
   1 -17   0  132.29   21.30
   1 -17   0  121.89   14.40
   1 -17   0  126.89   14.90
   1 -17   0  107.19   14.80
   1 -17   0  102.49   15.70
  -1 -17   0  137.19   23.00
  -1 -17   0  133.99   17.80
  -1 -17   0  135.69   15.90
  -1  17   0  132.89   15.60
   1  17   0  178.18   25.10
   1  17   0  135.39   10.90
  -1  17   0  109.59   18.40
   1  17   0  144.49   15.70
  -1  17   0  129.79   10.40
  -1  17   0  136.09   16.00
   1  17   0  133.29   13.60
   1  17   0  136.69   16.00
  -2 -17   0   35.00   10.50
  -2 -17   0   29.20    8.50
  -2 -17   0   22.40   13.30
  -2 -17   0   26.50    8.10
   2 -17   0   43.60   15.10
   2 -17   0   20.50    9.20
   2 -17   0   32.40   16.10
   2 -17   0   20.90    8.80
  -2 -17   0   13.90   10.40
   2 -17   0   32.10   11.30
   2  17   0   33.50    8.90
  -2  17   0   37.30   10.40
  -2  17   0   16.20    7.40
  -2  17   0   13.30    5.70
  -2  17   0   24.30   11.60
   2  17   0   27.10    9.70
  -2  17   0   19.20   13.10
   2  17   0   26.60    6.60
  -2  17   0   17.60    5.80
   2  17   0   17.20   12.10
  -2  17   0   30.30   14.50
   2  17   0   43.80   19.20
   3 -17   0  177.98   15.50
  -3 -17   0  188.28   18.80
  -3 -17   0  159.68   17.80
   3 -17   0  170.08   21.40
  -3 -17   0  181.28   13.60
  -3 -17   0  163.18   17.20
  -3 -17   0  158.18   17.00
   3 -17   0  205.78   25.40
   3 -17   0  179.88   17.40
   3 -17   0  189.28   20.10
  -3 -17   0  189.88   18.20
  -3 -17   0  186.38   26.50
  -3  17   0  182.18   13.00
   3  17   0  177.78   35.90
   3  17   0  203.28   13.40
  -3  17   0  264.97   19.50
  -3  17   0  171.98   12.00
  -3  17   0  182.68   21.30
   3  17   0  177.78   17.50
  -3  17   0  186.08   16.50
   3  17   0  191.78   16.40
  -3  17   0  183.08   23.20
   3  17   0  176.68   16.50
  -3  17   0  224.38   21.80
  -4 -17   0    4.90    9.60
  -4 -17   0   10.60    7.20
  -4 -17   0    7.70   13.20
   4 -17   0   14.50    7.30
   4 -17   0    7.00    7.20
  -4 -17   0    4.30    9.40
   4 -17   0   -4.70   14.30
  -4 -17   0    8.00    9.40
  -4 -17   0   -4.30    8.20
   4 -17   0    2.60   12.80
   4 -17   0   10.00   12.10
  -4 -17   0    0.50    8.70
   4  17   0   12.60    6.80
  -4  17   0    0.80    8.70
   4  17   0  -14.80   19.50
  -4  17   0   11.40   12.10
   4  17   0    5.90   11.50
   4  17   0   12.40    6.40
  -4  17   0   14.30   12.80
  -4  17   0    4.10    5.30
   4  17   0    5.20    6.90
  -4  17   0   -1.40    8.20
  -4  17   0   11.00    5.60
  -4  17   0   -0.70   12.40
  -5 -17   0  314.87   24.90
   5 -17   0  351.06   28.10
  -5 -17   0  367.86   36.60
  -5 -17   0  285.87   24.00
  -5 -17   0  319.77   18.90
   5 -17   0  334.57   26.20
   5 -17   0  333.37   22.30
  -5 -17   0  333.77   23.20
  -5 -17   0  380.26   24.90
   5 -17   0  353.06   26.70
  -5 -17   0  374.16   25.20
  -5  17   0  367.16   25.20
  -5  17   0  331.27   24.20
   5  17   0  364.06   25.00
  -5  17   0  346.97   24.00
   5  17   0  330.07   18.40
  -5  17   0  384.36   18.90
  -5  17   0  347.47   17.70
  -5  17   0  375.46   28.00
   5  17   0  374.66   24.10
   5  17   0  403.66   39.70
  -5  17   0  287.37   27.00
  -6 -17   0   12.00    9.40
   6 -17   0   33.80   15.00
   6 -17   0    7.30   11.10
  -6 -17   0    7.00    5.40
  -6 -17   0    1.70    9.70
  -6 -17   0   11.10   10.20
  -6 -17   0   10.30   10.90
   6 -17   0    8.80    5.90
   6 -17   0   13.60    9.50
   6 -17   0   18.60   17.00
  -6  17   0   21.00   10.80
   6  17   0   16.40    6.30
  -6  17   0   -1.40    9.50
   6  17   0   10.40    7.50
  -6  17   0   13.10    6.00
  -6  17   0    7.50   10.10
  -6  17   0    0.80   11.40
   6  17   0    6.80   20.80
   6  17   0    5.20    7.40
   6  17   0   11.60    8.20
   7 -17   0   44.40   12.60
  -7 -17   0   67.69   16.10
   7 -17   0   57.19   13.50
  -7 -17   0   60.29   12.70
  -7 -17   0   45.80    9.80
   7 -17   0   42.80   20.60
  -7 -17   0   53.79   14.00
  -7 -17   0   45.40   10.40
   7 -17   0   43.60   16.80
  -7 -17   0   43.30   15.20
   7 -17   0   23.40    9.00
   7  17   0   46.20   11.60
   7  17   0   34.40    9.40
   7  17   0   42.10   11.30
  -7  17   0   51.29   10.40
   7  17   0   70.19   21.30
   7  17   0   51.49    8.80
  -7  17   0   46.30   11.90
  -7  17   0   37.10   10.80
  -7  17   0   59.79   18.90
  -7  17   0   50.29    8.60
  -8 -17   0   16.80   12.40
  -8 -17   0   -6.70    8.30
   8 -17   0   16.60    9.70
  -8 -17   0    4.00    5.80
   8 -17   0    8.40   17.00
   8 -17   0   10.20   10.10
   8 -17   0    4.90    9.80
  -8 -17   0   10.00    8.00
  -8 -17   0    8.90   16.70
   8 -17   0    5.10   11.10
  -8  17   0   12.00    6.10
   8  17   0   10.80    9.30
  -8  17   0    8.30   10.10
   8  17   0    9.80    6.70
   8  17   0  -11.80   22.90
  -8  17   0    8.20   12.30
   8  17   0    6.90   10.00
  -8  17   0   10.00   10.20
  -8  17   0   22.00   13.00
   8  17   0   16.50    8.40
   9 -17   0   45.70   19.60
   9 -17   0   24.40   17.00
  -9 -17   0   11.10    8.10
  -9 -17   0   18.30   12.90
  -9 -17   0   11.00    8.90
   9 -17   0   28.90    9.80
  -9 -17   0   23.90    7.40
   9 -17   0   26.10    7.80
  -9 -17   0   14.70   12.50
   9 -17   0   14.20    9.50
   9  17   0   13.10    8.60
  -9  17   0    5.40   12.00
  -9  17   0   17.30    7.20
  -9  17   0    9.40    9.70
  -9  17   0   27.50   15.30
   9  17   0   14.60    8.20
   9  17   0   13.50   18.80
  -9  17   0   13.30   10.50
   9  17   0   10.80    8.90
   9  17   0   23.30    8.90
 -10 -17   0  -22.40    8.80
  10 -17   0   18.30   18.40
  10 -17   0   -8.10    6.80
 -10 -17   0    4.10    6.10
  10 -17   0    7.90    8.50
 -10 -17   0    3.70   11.40
 -10 -17   0    7.80    7.40
 -10 -17   0   15.50   16.20
  10 -17   0    0.00   11.30
  10 -17   0   14.40    8.20
 -10  17   0    7.60    8.50
  10  17   0    6.50    8.00
  10  17   0  -30.60   15.90
 -10  17   0    2.30    9.40
  10  17   0    2.50    7.00
  10  17   0   -6.00    5.20
 -10  17   0   11.00   10.30
  10  17   0    1.30    8.00
 -10  17   0    8.60    8.70
 -10  17   0    9.10   10.50
  10  17   0    6.60    4.90
  11 -17   0   10.00   12.20
 -11 -17   0   19.00   13.90
  11 -17   0    0.70    5.90
 -11 -17   0   12.40    9.80
  11 -17   0    2.90   20.20
  11 -17   0   18.80   10.60
 -11 -17   0    0.30   14.20
 -11 -17   0    4.40   11.30
 -11 -17   0   25.10   12.00
  11 -17   0   23.30   12.20
 -11  17   0   25.10   15.40
 -11  17   0   34.40   23.30
 -11  17   0   -0.70    9.70
  11  17   0   11.10    9.10
 -11  17   0    8.50    7.10
  11  17   0   23.10   10.00
  11  17   0    4.10   11.00
  11  17   0   15.70    8.10
  11  17   0   17.80    8.20
   0 -18   0   87.29   12.80
   0 -18   0   56.99   10.80
   0 -18   0   70.79   16.30
   0 -18   0   76.69   12.70
   0 -18   0   75.59   13.80
   0  18   0   50.69    9.30
   0  18   0  123.39   21.80
   0  18   0   77.79    8.80
   0  18   0   67.09   12.60
   0  18   0   94.79   13.90
  -1 -18   0    9.30   12.00
  -1 -18   0    7.20    8.50
  -1 -18   0   -6.10    8.30
   1 -18   0    1.70    9.10
   1 -18   0    8.60    8.60
  -1 -18   0   -3.10   10.10
  -1 -18   0   -6.20    5.60
   1 -18   0   -0.20    9.00
   1 -18   0    4.00    6.00
   1 -18   0   -5.80   14.70
   1  18   0   -0.50    7.60
  -1  18   0    3.80    4.60
  -1  18   0   23.20   24.10
   1  18   0   15.50   12.60
  -1  18   0    1.70   14.80
   1  18   0    2.20    4.90
   1  18   0  -14.90   10.30
   1  18   0   -8.40    5.20
  -1  18   0   -5.70    5.10
   2 -18   0   15.90    8.80
   2 -18   0   19.40   15.90
  -2 -18   0   40.00    9.40
  -2 -18   0   30.60   10.70
  -2 -18   0   12.70    9.40
  -2 -18   0   36.40   12.20
   2 -18   0   29.50   11.00
   2 -18   0   15.30    9.60
  -2 -18   0   14.70   16.60
   2 -18   0   38.10   11.50
   2  18   0   29.60   20.10
  -2  18   0   27.80   14.00
   2  18   0   22.60   12.70
   2  18   0   24.60   10.00
  -2  18   0   29.00   15.10
   2  18   0   14.90    8.50
  -2  18   0   40.50   12.90
   2  18   0   19.50    6.20
  -2  18   0   24.00   10.00
  -2  18   0   22.40    5.70
  -2  18   0   15.30    9.20
  -2  18   0   10.10    5.60
  -3 -18   0    6.40   11.70
   3 -18   0    6.00    6.10
  -3 -18   0   10.60    9.80
   3 -18   0    2.00   13.60
   3 -18   0    2.70   10.30
   3 -18   0    0.80    7.10
  -3 -18   0   -2.80    6.10
  -3 -18   0    6.80    8.50
  -3 -18   0   13.90    9.50
  -3 -18   0   -0.40    7.30
   3 -18   0   12.70   14.10
  -3 -18   0   -2.50    8.50
   3  18   0   -0.50    7.90
   3  18   0    9.50    5.90
  -3  18   0    6.50    5.00
  -3  18   0   -2.90    6.50
  -3  18   0    3.10    8.80
  -3  18   0    5.50    4.40
   3  18   0   -3.30   12.40
  -3  18   0   11.10    8.70
  -3  18   0   -3.20    5.30
   3  18   0    1.10    8.00
  -3  18   0    2.90    9.40
   3  18   0    3.30    6.10
  -4 -18   0  116.99   20.50
  -4 -18   0  151.18   13.40
  -4 -18   0  134.79   16.10
   4 -18   0  117.49   14.80
   4 -18   0  125.99   18.60
  -4 -18   0  169.08   17.30
  -4 -18   0  159.88   17.30
   4 -18   0  139.19   18.60
   4 -18   0   82.09   11.90
  -4 -18   0  162.38   17.70
  -4 -18   0  113.49   16.80
   4 -18   0  116.39   16.40
  -4  18   0  130.29   17.90
  -4  18   0  152.58   17.80
  -4  18   0  134.59   20.90
  -4  18   0  120.69   17.30
   4  18   0  127.49   11.00
   4  18   0  152.38   15.80
  -4  18   0  149.69   20.70
  -4  18   0  128.69   11.70
   4  18   0  146.09   18.50
  -4  18   0  133.79   11.00
   4  18   0  151.48   28.10
   5 -18   0    6.60   12.40
  -5 -18   0    6.70    8.70
  -5 -18   0   33.00   11.40
  -5 -18   0    7.60   10.20
   5 -18   0    4.30    8.10
   5 -18   0   15.10   11.10
   5 -18   0    6.00    9.00
  -5 -18   0   28.90   12.10
  -5 -18   0   13.00   10.40
  -5 -18   0   14.50    7.40
   5  18   0    4.30    5.60
   5  18   0   16.00   21.40
  -5  18   0   -4.70    8.90
   5  18   0   19.20   11.10
  -5  18   0   13.80    6.30
  -5  18   0    0.00    8.90
   5  18   0    0.00    9.20
  -5  18   0   19.80   14.50
   5  18   0    8.70    7.00
  -5  18   0    5.00    5.40
  -5  18   0   26.10   12.80
  -5  18   0    1.90    7.80
  -6 -18   0   50.89   12.20
  -6 -18   0   56.69   10.90
  -6 -18   0   78.19   13.90
   6 -18   0   69.59   14.20
  -6 -18   0   61.09   15.90
   6 -18   0   35.60    9.60
   6 -18   0   63.49   14.20
  -6 -18   0   48.00   16.00
   6 -18   0   70.99   16.50
   6 -18   0   70.79   15.70
  -6 -18   0   89.59   16.70
  -6  18   0   57.59    8.10
   6  18   0   38.40   10.30
   6  18   0   68.89   12.10
   6  18   0   64.09   10.70
  -6  18   0   51.09    8.30
  -6  18   0   67.79   13.70
   6  18   0  112.29   27.20
  -6  18   0   63.39   14.20
   6  18   0   61.39   13.00
  -6  18   0   89.59   19.60
  -6  18   0   83.69   15.70
  -7 -18   0   -6.30    9.40
  -7 -18   0    5.50   16.40
   7 -18   0   26.00   16.00
   7 -18   0    3.30    5.60
  -7 -18   0    5.80    6.30
   7 -18   0   16.10   13.80
  -7 -18   0   15.10   10.00
  -7 -18   0   -5.60    9.20
   7 -18   0   14.20   14.80
  -7 -18   0    8.10    7.30
   7 -18   0    2.30    7.30
   7  18   0    5.60    5.50
  -7  18   0   27.50   15.10
  -7  18   0   -2.30    6.90
   7  18   0    1.70    6.90
   7  18   0   18.60   16.90
   7  18   0    9.50    9.90
  -7  18   0    6.50    5.90
   7  18   0    6.00    5.40
  -7  18   0   10.00   10.30
  -7  18   0    9.50    9.20
   8 -18   0   39.60   12.00
   8 -18   0   78.59   22.10
  -8 -18   0   27.00   10.20
   8 -18   0   47.00   11.60
  -8 -18   0   41.00   18.90
  -8 -18   0   56.99   11.40
  -8 -18   0   31.20   13.20
  -8 -18   0   37.80   13.20
   8 -18   0   44.10   12.80
   8 -18   0   50.29   14.10
   8  18   0   49.10   13.30
  -8  18   0   37.80   10.60
  -8  18   0   42.60   11.50
  -8  18   0   50.89   15.00
  -8  18   0   49.10   18.60
   8  18   0   45.30   12.20
   8  18   0   32.20   26.90
  -8  18   0   37.90    7.90
   8  18   0   54.29   13.10
  -9 -18   0   14.60    6.30
   9 -18   0   17.90   16.20
  -9 -18   0   18.10   11.20
   9 -18   0   -3.30    9.40
  -9 -18   0  -16.40   10.00
   9 -18   0    6.50    9.00
  -9 -18   0    2.70   11.50
  -9 -18   0    7.70    9.10
   9 -18   0   -7.50    9.00
   9 -18   0    0.40   12.40
   9  18   0    1.00    8.30
   9  18   0    0.90    8.80
  -9  18   0   11.40    7.00
  -9  18   0    5.30   11.90
   9  18   0  -24.10   17.00
  -9  18   0   -3.10   15.00
  -9  18   0    1.20   10.40
  -9  18   0   -0.40    9.60
   9  18   0   -3.40   10.50
   9  18   0    9.60   10.20
  10 -18   0   19.10   11.40
 -10 -18   0    3.90   15.00
 -10 -18   0   16.50   11.60
  10 -18   0   20.90   11.70
  10 -18   0   18.80   12.10
  10 -18   0   52.79   22.40
 -10 -18   0   16.60   13.60
 -10 -18   0    6.20    8.80
 -10 -18   0   31.50   11.70
  10 -18   0   12.40   11.60
  10  18   0   22.50    8.10
 -10  18   0   15.30   11.80
  10  18   0   20.70   10.80
  10  18   0   11.80   32.60
 -10  18   0   27.40   11.70
 -10  18   0    5.10    8.20
 -10  18   0   20.90   12.40
  10  18   0   12.80   11.60
  10  18   0    1.20   12.10
 -10  18   0   39.50   20.40
  11 -18   0   25.30   21.60
 -11 -18   0   -3.90    8.10
  11 -18   0   -4.30   11.80
  11 -18   0    5.50    9.60
 -11 -18   0  -10.90   14.40
 -11 -18   0   21.10   10.50
 -11 -18   0   12.00   13.40
  11 -18   0    0.90   10.50
 -11 -18   0    8.40   10.50
  11 -18   0  -10.80   19.40
 -11  18   0   -0.50   10.30
 -11  18   0   13.60    7.40
  11  18   0  -24.50   27.10
  11  18   0   -7.70   11.20
  11  18   0   14.00    8.70
  11  18   0    9.90    7.70
  11  18   0   11.50    8.00
 -11  18   0    9.60   13.30
  11  18   0   11.80   11.10
 -11  18   0   -3.60   11.60
   0 -19   0   -8.50   14.60
   0 -19   0    5.00   11.90
   0 -19   0    8.90    9.00
   0 -19   0    0.90    5.20
   0 -19   0  -13.20    8.40
   0  19   0   -3.20    5.50
   0  19   0    0.00   12.00
   0  19   0    6.00    5.40
   0  19   0    0.10   24.10
   0  19   0  -12.10    6.30
   1 -19   0  179.58   17.50
  -1 -19   0  129.79   15.00
   1 -19   0  135.09   17.30
   1 -19   0  134.59   22.40
  -1 -19   0  153.18   24.30
   1 -19   0  151.28   18.30
  -1 -19   0  156.78   16.80
  -1 -19   0  185.48   18.10
   1 -19   0  153.88   21.20
  -1 -19   0  152.68   20.80
  -1  19   0  132.39   16.40
   1  19   0   94.49   14.40
  -1  19   0  159.08   11.80
  -1  19   0  170.68   22.00
   1  19   0  176.78   24.00
   1  19   0  176.58   12.40
  -1  19   0  148.99   17.90
   1  19   0  189.88   18.60
  -2 -19   0    7.40    8.90
   2 -19   0    0.60    5.70
   2 -19   0   24.00   15.50
   2 -19   0   10.90    7.30
  -2 -19   0   10.90   12.90
   2 -19   0   27.80   11.10
  -2 -19   0    4.80    9.70
  -2 -19   0   23.60   10.40
  -2 -19   0    6.90   10.40
   2 -19   0   11.50    8.30
  -2 -19   0   21.80    9.10
  -2  19   0   -9.80   14.20
   2  19   0   -6.20    4.70
   2  19   0   -1.90    7.90
  -2  19   0    2.80    4.90
   2  19   0   12.90    6.90
  -2  19   0    3.70   12.60
  -2  19   0   -3.00    5.30
  -2  19   0    1.00    7.40
   2  19   0   11.60    6.30
  -2  19   0   14.60    9.10
   2  19   0    3.40   12.90
  -2  19   0    3.20    9.90
   3 -19   0    2.90    6.70
  -3 -19   0    6.60    8.70
  -3 -19   0   10.00    7.50
   3 -19   0    8.90    7.20
   3 -19   0   21.60   15.10
  -3 -19   0   17.90    8.40
  -3 -19   0    3.70    8.90
   3 -19   0    9.40   10.50
  -3 -19   0   11.60    9.30
  -3 -19   0   24.80   18.00
   3 -19   0   12.40   10.30
  -3  19   0    7.40   11.10
   3  19   0   24.00    9.80
  -3  19   0    0.10   13.30
  -3  19   0   18.90   13.40
  -3  19   0    9.90    5.60
  -3  19   0   -7.40    8.30
   3  19   0   20.40   19.80
  -3  19   0   19.10    5.60
   3  19   0    9.40    6.10
   3  19   0    9.70    9.20
  -3  19   0    3.50    9.70
   3  19   0    4.20    5.80
   4 -19   0   51.69   13.00
   4 -19   0   86.39   17.70
  -4 -19   0   57.39   11.70
  -4 -19   0   53.09    8.50
  -4 -19   0   65.69   13.00
   4 -19   0   48.10   14.20
  -4 -19   0   79.69   14.90
  -4 -19   0   52.89   24.30
   4 -19   0   54.59   10.50
  -4 -19   0   72.19   14.30
   4 -19   0   64.49   12.40
  -4 -19   0   81.89   13.90
  -4  19   0   61.09   16.90
   4  19   0   63.99    9.60
   4  19   0   98.29   25.50
  -4  19   0   68.79   13.80
  -4  19   0   54.19   12.80
  -4  19   0   84.49   15.70
   4  19   0   43.70    9.70
   4  19   0   61.39   11.80
   4  19   0   71.39   14.80
  -4  19   0   78.39   19.60
  -4  19   0   73.39    8.90
  -4  19   0   54.79    8.90
   5 -19   0   63.89   14.10
   5 -19   0   41.90   14.70
  -5 -19   0   68.09   14.60
  -5 -19   0   35.20   19.20
  -5 -19   0   28.70   10.80
   5 -19   0   32.20   12.00
  -5 -19   0   64.29   12.20
  -5 -19   0   57.49   13.00
  -5 -19   0   39.10    9.60
   5 -19   0   53.99   16.70
   5 -19   0   29.60    9.90
  -5 -19   0   69.99   15.70
   5  19   0   71.99   10.20
   5  19   0   43.50   12.00
  -5  19   0   62.99   15.60
  -5  19   0   56.39   13.40
  -5  19   0   39.90   10.50
  -5  19   0   48.60   15.20
  -5  19   0   31.90    7.10
   5  19   0   51.09   25.00
   5  19   0   21.40    7.90
  -5  19   0   54.89    8.80
  -5  19   0   27.40   12.80
   5  19   0   41.30   12.70
   6 -19   0   15.60   13.70
  -6 -19   0    8.40    7.50
  -6 -19   0   18.70    8.10
   6 -19   0    4.70   11.10
  -6 -19   0   11.90    8.90
   6 -19   0   -3.80    9.20
  -6 -19   0   13.30   11.30
  -6 -19   0    8.10   12.70
  -6 -19   0   30.00   11.50
   6 -19   0   19.10   12.20
   6 -19   0   -3.60    9.50
   6  19   0   16.00    9.50
  -6  19   0   14.90   10.60
  -6  19   0   16.10    6.10
   6  19   0    7.80   10.20
   6  19   0   11.10   10.90
  -6  19   0    7.90    7.20
   6  19   0   33.50   24.80
  -6  19   0    8.90    5.70
   6  19   0   -1.60    6.80
  -6  19   0  -16.70   10.60
  -6  19   0   16.30   12.50
   7 -19   0   58.09   14.50
  -7 -19   0   29.00   19.60
   7 -19   0   52.39   11.70
  -7 -19   0   29.90    7.70
   7 -19   0   68.69   16.40
  -7 -19   0   52.79   15.20
  -7 -19   0   53.59   13.70
   7 -19   0   45.80   10.20
   7 -19   0   24.10   16.90
  -7 -19   0   57.49   11.80
  -7 -19   0   51.09   14.40
   7  19   0   45.20   11.50
   7  19   0   56.49   21.80
  -7  19   0   46.00    8.20
  -7  19   0   46.10   12.80
   7  19   0   55.09    9.30
  -7  19   0   77.99   19.60
   7  19   0   60.39   12.80
  -7  19   0   49.70   13.90
  -7  19   0   44.40    8.30
  -7  19   0   35.50   13.50
   7  19   0   40.40   10.10
   8 -19   0    1.50   10.20
  -8 -19   0    0.70   11.00
   8 -19   0    8.40   16.70
  -8 -19   0   23.90    9.20
  -8 -19   0    7.00   17.60
  -8 -19   0   11.50    6.50
  -8 -19   0   47.00   13.70
   8 -19   0   16.80    8.90
  -8 -19   0   59.39   13.60
   8 -19   0   16.30   18.60
   8 -19   0    7.20    8.50
   8  19   0   35.70   12.20
  -8  19   0   -4.70   12.50
   8  19   0   12.20   24.30
   8  19   0   21.30    9.20
  -8  19   0   11.00    8.90
   8  19   0    7.10   10.00
  -8  19   0   17.30    6.80
  -8  19   0   13.10    7.90
   9 -19   0   12.80   15.70
   9 -19   0   25.40   11.60
   9 -19   0   32.80   16.20
  -9 -19   0   20.20    9.50
   9 -19   0   22.00   11.60
  -9 -19   0   19.50   14.50
  -9 -19   0   36.90   13.90
   9 -19   0   46.00   12.30
  -9 -19   0   29.40   12.30
  -9 -19   0   36.20   14.20
  -9  19   0   25.30    7.70
   9  19   0   13.00   11.90
  -9  19   0   17.60   10.00
   9  19   0   37.20   10.50
  -9  19   0   26.90   10.40
   9  19   0   74.39   28.50
  -9  19   0   19.80   14.70
   9  19   0   15.20   12.60
   9  19   0   31.80   11.40
 -10 -19   0   -8.00   11.10
 -10 -19   0    9.10    9.70
 -10 -19   0   -0.90   11.80
 -10 -19   0   19.50   11.10
  10 -19   0    9.30   12.10
 -10 -19   0   16.20   15.30
  10 -19   0   -4.00    9.70
  10 -19   0    7.70   11.50
  10 -19   0  -11.60   18.50
  10 -19   0    4.40   12.60
  10  19   0   -6.00   11.00
 -10  19   0    8.60    9.30
 -10  19   0   10.50    9.80
  10  19   0   17.60   11.60
 -10  19   0    8.80    8.30
  10  19   0   -7.20   29.60
 -10  19   0   -3.20    6.50
  10  19   0    9.40    7.30
   0 -20   0  136.49   17.60
   0 -20   0  149.59   17.40
   0 -20   0  123.49   20.10
   0 -20   0  108.59   18.20
   0 -20   0   85.79   13.10
   0  20   0  163.58   27.40
   0  20   0  116.39   10.90
   0  20   0  118.69   18.20
  -1 -20   0    5.60    8.70
   1 -20   0   12.30   13.10
  -1 -20   0    3.10    9.10
  -1 -20   0  -15.80   16.30
   1 -20   0   -1.60   11.10
   1 -20   0    4.50    9.40
   1 -20   0    4.70    6.40
   1 -20   0   12.50    7.90
  -1 -20   0   -7.80   11.00
  -1 -20   0    5.00    7.40
  -1  20   0    0.30    9.40
  -1  20   0   -5.00   15.70
  -1  20   0    0.50    4.70
   1  20   0   -6.10    8.90
   1  20   0   -2.20   17.90
   1  20   0   -5.00    5.60
   1  20   0   -6.50    5.70
  -1  20   0   -5.90   12.60
   1  20   0    3.00    5.40
   2 -20   0   99.69   14.30
   2 -20   0   85.19   17.10
   2 -20   0   90.89   21.00
  -2 -20   0   70.39   14.90
   2 -20   0   99.29   16.70
  -2 -20   0   88.59   25.60
  -2 -20   0   99.69   15.50
  -2 -20   0   79.89   14.30
   2 -20   0   53.79   11.30
  -2 -20   0   96.49   14.30
  -2 -20   0  115.49   15.20
  -2  20   0  120.69   12.00
   2  20   0  100.99   22.20
  -2  20   0  126.19   17.90
   2  20   0  100.39   16.00
  -2  20   0   76.99   15.70
  -2  20   0   92.39   10.00
  -2  20   0   78.39   17.40
   2  20   0  100.59   11.10
   2  20   0  110.89   15.70
   3 -20   0   36.50   10.40
  -3 -20   0   26.10   19.80
  -3 -20   0   44.60   12.50
   3 -20   0   55.39   14.90
   3 -20   0   29.30    9.50
  -3 -20   0   44.70   12.70
  -3 -20   0   60.39   13.60
   3 -20   0   42.00   13.20
  -3 -20   0   64.19   12.50
   3 -20   0   64.09   15.30
  -3 -20   0   25.40   10.50
  -3  20   0   55.59   13.80
   3  20   0   42.00    8.10
   3  20   0   46.00   12.20
  -3  20   0   46.20    8.40
  -3  20   0   65.39   15.00
  -3  20   0   36.10   11.70
  -3  20   0   65.89   18.20
   3  20   0   22.80    8.00
   3  20   0   48.40   22.20
  -3  20   0   52.19    7.90
  -3  20   0   49.20   15.30
   3  20   0   32.80   23.30
   4 -20   0   19.90    7.40
   4 -20   0   30.30   12.30
  -4 -20   0   28.00   10.50
  -4 -20   0    7.50   10.40
   4 -20   0   31.70   10.10
   4 -20   0   25.60   12.20
  -4 -20   0   22.20   11.10
  -4 -20   0   28.90    8.30
  -4 -20   0   37.10   10.70
   4 -20   0   13.60   11.20
  -4 -20   0   22.20   14.90
  -4 -20   0   32.70   11.90
  -4  20   0   32.60    6.70
   4  20   0   24.90    7.60
  -4  20   0   29.50    7.20
   4  20   0   12.60    7.00
   4  20   0   34.50   21.60
  -4  20   0   25.90   15.20
  -4  20   0   41.50   15.30
  -4  20   0   13.80   13.50
   4  20   0   35.30   13.50
  -4  20   0   23.60   10.10
  -4  20   0   13.30   11.20
   4  20   0   32.30   10.30
  -5 -20   0    0.90    9.20
   5 -20   0    6.40    9.80
  -5 -20   0   -1.10    3.80
  -5 -20   0   18.30    9.10
  -5 -20   0   28.10   10.90
   5 -20   0   11.00    8.90
   5 -20   0    8.00   13.00
   5 -20   0   -3.40   10.20
  -5 -20   0   -0.60   12.10
  -5 -20   0    0.70    9.70
   5 -20   0   13.80   13.40
  -5 -20   0    8.50   10.20
  -5  20   0   26.00   13.70
  -5  20   0    1.90    9.90
  -5  20   0   11.40    6.10
   5  20   0   10.90   11.20
   5  20   0   -6.50   21.60
  -5  20   0    9.50   13.40
  -5  20   0   19.10    8.30
   5  20   0   -2.00    6.00
  -5  20   0   16.30    5.80
   5  20   0    8.80   10.30
   5  20   0    8.10   11.10
   6 -20   0   49.10   12.40
  -6 -20   0   72.59   21.20
  -6 -20   0   63.29   15.00
  -6 -20   0   75.19   13.30
  -6 -20   0   33.20    8.80
   6 -20   0   94.79   20.40
  -6 -20   0   90.89   17.90
   6 -20   0   48.60   14.10
  -6 -20   0   51.89    9.40
   6 -20   0   51.19   15.30
   6 -20   0   56.89   14.00
  -6 -20   0   65.69   13.40
   6  20   0   60.99   11.20
  -6  20   0   47.70   12.90
   6  20   0   68.39   13.00
  -6  20   0   58.99    9.00
   6  20   0  133.29   29.20
   6  20   0   59.69   13.90
  -6  20   0   65.59    8.40
   6  20   0   82.09   15.60
  -6  20   0   62.89   20.00
  -6  20   0   67.59   15.80
  -6  20   0   72.79   13.20
  -7 -20   0   -0.80    6.70
   7 -20   0   -6.80   10.20
   7 -20   0    9.40   11.00
   7 -20   0    1.00   15.50
   7 -20   0   11.80   12.20
   7 -20   0   -8.30   10.00
  -7 -20   0    7.50   10.70
  -7 -20   0    3.40    7.60
  -7 -20   0   12.60   11.00
  -7 -20   0   -9.20   16.00
  -7 -20   0    8.00    9.60
  -7  20   0    5.30    5.50
   7  20   0   -0.70    9.50
  -7  20   0   -7.80    8.50
  -7  20   0    4.40    5.50
   7  20   0    2.00   10.40
  -7  20   0    1.60   10.30
  -7  20   0   -0.30    9.50
   7  20   0   21.10   12.50
  -7  20   0    5.30   13.50
   7  20   0   25.90   24.30
   7  20   0    9.40   10.80
   8 -20   0   59.99   22.10
  -8 -20   0   83.29   16.50
   8 -20   0   35.00   13.20
  -8 -20   0   55.99   14.60
   8 -20   0   49.70   11.00
   8 -20   0   52.99   18.40
  -8 -20   0   39.80    8.40
  -8 -20   0   41.70   11.40
  -8 -20   0   37.40   11.30
  -8 -20   0   17.90   15.00
   8 -20   0   31.80   10.00
   8  20   0   31.20   25.10
   8  20   0   45.50   12.40
  -8  20   0   54.59   15.10
   8  20   0   43.90    9.00
  -8  20   0   70.79   16.30
   8  20   0   37.30   11.20
  -8  20   0   47.40    8.50
  -8  20   0   59.29   16.20
  -8  20   0   32.50   18.50
   8  20   0   41.90   11.00
  -9 -20   0   -1.90   13.20
   9 -20   0   25.80   21.10
   9 -20   0   22.10   10.10
   9 -20   0    4.50    6.60
  -9 -20   0    3.20    7.30
  -9 -20   0  -12.20   13.20
   9 -20   0    3.30   11.90
  -9 -20   0   18.70    8.40
   9 -20   0    0.60   12.40
  -9 -20   0   -0.20   12.70
  -9  20   0   -4.70    7.70
  -9  20   0    1.10    8.60
   9  20   0  -12.10   11.90
  -9  20   0   15.20   16.10
   9  20   0   -0.40    8.20
  -9  20   0   29.20   11.30
  -9  20   0   -5.10   12.10
   9  20   0  -36.20   25.70
   9  20   0    0.20    7.30
   9  20   0   17.00   12.70
   0 -21   0   15.90    8.80
   0 -21   0   -5.70   16.70
   0 -21   0   -6.80    6.40
   0 -21   0  -10.90   11.90
   0 -21   0    2.20    9.80
   0  21   0    9.00   10.00
   0  21   0    2.80    4.90
   0  21   0    0.70   12.70
   0  21   0   15.10   10.80
  -1 -21   0   72.59   12.60
  -1 -21   0   69.79   12.40
   1 -21   0   21.70   10.50
   1 -21   0   76.19   14.30
  -1 -21   0   35.10   10.20
  -1 -21   0   57.79   12.80
   1 -21   0   48.70   19.30
   1 -21   0   47.70   12.80
   1 -21   0   63.29   14.20
   1  21   0   54.39   12.00
   1  21   0   59.29   14.30
  -1  21   0   65.89   21.30
  -1  21   0   43.80   13.50
   1  21   0   37.40   22.60
  -1  21   0   45.00   11.60
   1  21   0   59.19    8.80
  -1  21   0   57.29    8.40
   1  21   0   46.40   15.70
  -1  21   0   38.30    6.20
  -1  21   0   48.20   12.80
   2 -21   0   49.00   12.70
  -2 -21   0   44.60   10.90
   2 -21   0   83.19   16.30
  -2 -21   0   46.00   11.30
   2 -21   0   58.89   18.80
  -2 -21   0   44.80   15.80
  -2 -21   0   78.29   12.60
   2 -21   0   36.40   12.40
  -2 -21   0   45.60   13.10
   2 -21   0   37.20   15.40
  -2 -21   0   26.10   10.40
   2  21   0   27.00   22.00
   2  21   0   55.49   16.60
  -2  21   0   74.89   20.30
   2  21   0   57.49   13.50
   2  21   0   59.39   14.10
  -2  21   0   38.70   14.20
   2  21   0   47.40    7.80
  -2  21   0   46.60   12.00
  -2  21   0   53.29    9.20
  -2  21   0   55.39   14.30
  -2  21   0   42.90    7.60
  -3 -21   0   39.90   12.90
   3 -21   0   30.20    8.70
   3 -21   0   31.70   13.00
   3 -21   0   45.30   11.40
  -3 -21   0   33.30    9.40
  -3 -21   0   35.30   15.70
  -3 -21   0   36.80   13.40
  -3 -21   0   72.09   13.10
   3 -21   0   47.20   14.60
  -3 -21   0   42.10   12.60
   3 -21   0   55.79   15.10
   3  21   0   41.30   11.50
  -3  21   0   31.00   13.60
  -3  21   0   38.60    8.40
  -3  21   0   53.79   16.80
   3  21   0   29.50   14.20
  -3  21   0   71.99   15.90
   3  21   0   39.60   12.50
   3  21   0   42.70    8.30
  -3  21   0   48.60   11.20
  -3  21   0   47.50   16.80
  -3  21   0   38.20    7.40
   3  21   0   30.00   22.30
  -4 -21   0  114.69   16.00
  -4 -21   0   84.79   16.10
  -4 -21   0   83.69   15.70
  -4 -21   0   50.59   11.80
   4 -21   0   47.70   17.70
  -4 -21   0   65.29   14.00
  -4 -21   0   50.49   21.20
   4 -21   0   44.30   11.10
   4 -21   0   93.09   19.10
   4 -21   0   92.19   18.90
   4 -21   0   66.69   13.10
  -4  21   0   77.49   10.30
  -4  21   0  114.99   31.80
  -4  21   0  114.89   22.90
  -4  21   0   86.29   15.80
   4  21   0   74.49   13.60
   4  21   0   56.39   10.90
   4  21   0   83.19   10.70
  -4  21   0   96.79   15.60
   4  21   0   60.09   21.50
   4  21   0   95.09   16.80
  -4  21   0   59.89   17.00
  -4  21   0   67.19    8.80
   5 -21   0   26.00   12.30
   5 -21   0   29.60   16.60
  -5 -21   0   34.20   12.20
  -5 -21   0   71.39   14.60
   5 -21   0   21.70   11.20
  -5 -21   0   16.80    8.30
  -5 -21   0   36.90   11.70
   5 -21   0   35.20   16.70
   5 -21   0   18.40   14.70
  -5 -21   0   46.30   10.70
  -5 -21   0   39.80   11.40
  -5 -21   0   11.90   18.20
   5  21   0   54.89   14.70
   5  21   0   31.10   12.70
   5  21   0   37.50   13.00
   5  21   0   24.60   19.10
  -5  21   0   31.40   10.10
  -5  21   0   49.30   17.30
  -5  21   0   31.30    8.20
   5  21   0   33.50    8.70
  -5  21   0   42.20   13.50
  -5  21   0   29.90    6.80
  -5  21   0   27.30   11.20
   6 -21   0    8.10   10.40
  -6 -21   0   20.80    9.60
  -6 -21   0   31.70   10.70
   6 -21   0   12.80   12.60
   6 -21   0   26.70   16.40
   6 -21   0   19.40    8.60
  -6 -21   0  -16.10   16.30
  -6 -21   0    0.30    6.00
  -6 -21   0    1.90    6.30
  -6 -21   0    2.20    9.90
   6 -21   0    2.70    9.60
  -6  21   0   10.30    8.70
   6  21   0  -16.70   10.60
   6  21   0    4.50   11.60
  -6  21   0    5.10   11.50
  -6  21   0   11.90   15.50
  -6  21   0    8.50    5.50
   6  21   0    5.10   23.80
   6  21   0   -2.70    4.50
  -6  21   0    8.10    9.10
  -6  21   0   -7.70    4.60
   6  21   0    7.00   10.00
   7 -21   0   62.29   13.90
  -7 -21   0   53.79   14.70
  -7 -21   0   51.59   11.40
   7 -21   0   54.59   15.00
   7 -21   0   72.99   21.20
   7 -21   0   34.30   13.70
  -7 -21   0   75.09   20.40
  -7 -21   0   46.90   11.50
  -7 -21   0   65.79   15.70
   7 -21   0   56.59   13.70
  -7 -21   0   77.19   15.60
   7  21   0   37.10   20.20
   7  21   0  116.59   41.70
   7  21   0   39.60    9.90
  -7  21   0   50.49    8.60
  -7  21   0   49.40   14.80
  -7  21   0   61.89   22.70
  -7  21   0   70.09   10.30
  -7  21   0   56.09   15.00
   7  21   0   45.40   13.90
   7  21   0   44.00   13.50
  -8 -21   0   -1.80    7.90
   8 -21   0    5.00    8.00
   8 -21   0   -0.50   13.20
  -8 -21   0   -4.30   10.30
   8 -21   0    3.40   15.90
   8 -21   0    2.70    9.40
   8 -21   0   -7.90   11.50
  -8 -21   0    8.50   12.40
  -8 -21   0   -7.50    7.70
   8  21   0   18.60   10.20
  -8  21   0   -4.60   11.60
   8  21   0   -5.70   20.30
   8  21   0  -19.50   18.10
  -8  21   0    4.70    5.80
  -8  21   0   32.30   14.20
   8  21   0   14.10   12.00
   8  21   0   -9.80    7.00
  -8  21   0   -0.30   12.60
  -8  21   0    1.60    5.40
  -8  21   0   -7.40   14.70
   0 -22   0   47.40   15.30
   0 -22   0   37.90   13.10
   0 -22   0   33.90   19.20
   0 -22   0   28.80   11.10
   0 -22   0   68.59   11.80
   0  22   0   36.50    6.90
   0  22   0   40.20   20.80
   0  22   0   38.40   15.80
   0  22   0   40.70   11.10
  -1 -22   0   17.30    8.20
   1 -22   0   -0.10    6.60
  -1 -22   0   -1.50   10.60
   1 -22   0   32.20   12.80
  -1 -22   0   -5.40   10.00
  -1 -22   0    3.60   16.60
   1 -22   0   14.70    8.70
   1 -22   0   11.80   13.50
  -1 -22   0    1.10    9.10
   1 -22   0  -21.20   30.50
   1  22   0   -7.20    9.40
  -1  22   0   -1.90    6.60
   1  22   0    6.20   13.30
  -1  22   0   -4.90   13.70
   1  22   0    7.30    8.10
   1  22   0    5.40   14.00
   1  22   0    8.20    6.00
  -1  22   0    6.20    5.10
  -1  22   0  -11.60    6.40
  -1  22   0    3.10    5.00
  -1  22   0    5.40   17.30
   2 -22   0   31.80   17.60
  -2 -22   0   41.50   12.50
   2 -22   0   24.80   11.60
  -2 -22   0   19.40   18.30
   2 -22   0   17.10    7.80
  -2 -22   0   14.90   11.60
   2 -22   0   47.20   12.70
  -2 -22   0   30.20   12.00
   2 -22   0   56.19   13.80
  -2 -22   0   11.30   12.60
  -2  22   0   21.30   15.50
   2  22   0   11.40    7.10
   2  22   0   21.00    9.60
  -2  22   0   37.50   14.50
  -2  22   0   23.40    9.70
   2  22   0   27.20   13.90
  -2  22   0   22.80    7.50
   2  22   0   41.40   12.30
  -2  22   0   34.70    6.80
   2  22   0   21.10   22.60
  -2  22   0    6.90    9.10
  -3 -22   0    8.20   18.60
   3 -22   0    9.30   10.20
  -3 -22   0   33.20   13.20
   3 -22   0    9.50    7.10
  -3 -22   0   13.10    8.10
  -3 -22   0   34.20   10.10
  -3 -22   0    4.60   10.90
   3 -22   0   33.50   13.30
   3 -22   0   24.30   16.90
   3 -22   0    4.80   14.60
  -3  22   0   20.80    6.90
  -3  22   0   19.10    6.10
   3  22   0   12.20   11.00
  -3  22   0   26.90    9.60
   3  22   0   21.60    7.00
  -3  22   0   27.80   14.50
  -3  22   0   24.30   10.60
   3  22   0   23.60   13.60
  -3  22   0   55.39   18.00
  -3  22   0    9.60   11.30
   3  22   0   20.60   17.80
   3  22   0   21.70   11.10
  -4 -22   0   24.20   12.20
  -4 -22   0   29.00    8.00
   4 -22   0   56.39   12.40
  -4 -22   0   44.80   14.90
   4 -22   0   41.50   14.00
   4 -22   0   33.30   11.80
  -4 -22   0   46.70   11.80
   4 -22   0   15.60   16.70
  -4 -22   0   40.20   20.00
  -4  22   0   47.80   13.50
  -4  22   0   45.90   12.30
   4  22   0   58.29   15.70
  -4  22   0   44.70    8.80
  -4  22   0   37.10    7.40
  -4  22   0   26.00   12.40
   4  22   0   47.00    9.50
   4  22   0   53.79   20.50
  -4  22   0   57.39   17.20
   4  22   0   35.20   13.50
   4  22   0   56.19   13.00
   5 -22   0   30.50   15.90
  -5 -22   0   22.80    8.60
   5 -22   0    8.40   16.20
   5 -22   0   17.40   14.80
  -5 -22   0   63.89   12.20
  -5 -22   0   24.10   10.20
  -5 -22   0   25.80   19.60
   5 -22   0   14.30   12.10
   5 -22   0   30.90   12.00
  -5 -22   0   33.00   12.10
  -5 -22   0   23.90   12.30
   5  22   0    0.90   18.30
  -5  22   0   17.30   11.80
  -5  22   0   12.70   14.30
  -5  22   0   12.30   11.60
  -5  22   0   19.40    6.30
  -5  22   0   39.00   13.20
  -5  22   0   26.90    7.30
   5  22   0   24.30    8.30
   5  22   0   31.00   10.50
   5  22   0   12.00   12.60
   5  22   0   11.10    9.50
  -6 -22   0   46.90   15.10
  -6 -22   0   29.80   11.10
   6 -22   0   32.60   11.90
   6 -22   0   35.70   11.00
   6 -22   0   20.40   14.30
  -6 -22   0   19.30    8.50
   6 -22   0   16.20   16.80
   6 -22   0   50.09   17.20
  -6 -22   0   29.80   10.80
  -6 -22   0   33.00   15.20
   6  22   0   34.30   13.40
  -6  22   0   56.49   18.50
   6  22   0   21.40   28.80
  -6  22   0   30.30    7.70
  -6  22   0   49.20   19.20
  -6  22   0   34.20    7.70
   6  22   0   30.90    9.50
  -6  22   0   35.70   11.10
   6  22   0   37.20   13.10
   6  22   0   32.80   13.70
   7 -22   0    6.00   12.10
  -7 -22   0    0.20    5.10
  -7 -22   0   -4.50    9.30
   7 -22   0   17.30   17.00
   7 -22   0  -13.50   10.70
  -7 -22   0   18.50   11.40
  -7 -22   0   37.40    9.70
  -7 -22   0    8.70    8.80
   7 -22   0    9.80   10.40
  -7 -22   0   26.80   13.00
   7 -22   0   16.50   11.60
  -7  22   0   20.30   13.00
  -7  22   0   -0.90   11.60
   7  22   0   50.49   27.30
   7  22   0    0.30    5.00
   7  22   0   15.30   11.30
   7  22   0    0.60   11.70
  -7  22   0    1.90   12.10
  -7  22   0   -0.90    5.50
  -7  22   0   -0.30    6.00
  -7  22   0   21.40   16.10
   7  22   0    2.70   11.40
   0 -23   0   -0.10   12.00
   0 -23   0   -7.60    7.90
   0 -23   0    5.20    7.00
   0 -23   0   -4.60    9.90
   0  23   0   -9.00    8.90
   0  23   0   36.90   18.70
   0  23   0    4.10    9.80
   0  23   0    1.50    5.40
   1 -23   0   -4.50   15.20
   1 -23   0    7.30   10.00
  -1 -23   0   -4.30   11.60
  -1 -23   0    3.50    6.70
  -1 -23   0    1.70   10.80
   1 -23   0    9.60    7.50
   1 -23   0   21.30   13.50
   1 -23   0   23.70   10.00
  -1 -23   0   11.50    8.90
  -1  23   0   -1.10   10.20
   1  23   0   -3.90   10.80
  -1  23   0    0.50   10.50
  -1  23   0   -1.20    5.20
  -1  23   0   17.30   17.20
   1  23   0   -5.60    6.00
   1  23   0  -22.60   11.40
  -1  23   0    6.50    5.20
   1  23   0    5.70    5.60
  -1  23   0   -6.90   10.40
   1  23   0   24.70   21.40
  -2 -23   0    3.30    8.80
   2 -23   0   -5.70    9.00
   2 -23   0    4.80   14.70
   2 -23   0   13.60   11.00
  -2 -23   0    5.60    8.00
   2 -23   0   19.80   11.60
  -2 -23   0   11.00    9.80
  -2 -23   0  -11.90   10.10
  -2 -23   0    4.30   12.80
   2  23   0   -7.60   12.30
  -2  23   0  -29.60   13.40
  -2  23   0    3.30    6.30
   2  23   0   -7.40    5.50
   2  23   0    2.60   11.10
   2  23   0   -1.30    5.50
  -2  23   0    9.10   12.80
  -2  23   0    3.80    4.90
   2  23   0   -9.50   20.40
   3 -23   0   53.19   17.20
  -3 -23   0   29.40   11.60
  -3 -23   0   37.50   11.20
  -3 -23   0   26.40   11.90
   3 -23   0   20.50   12.50
  -3 -23   0   11.40   14.40
   3 -23   0   17.80   19.40
   3 -23   0   25.90   11.50
  -3 -23   0   23.10   12.70
   3 -23   0   48.30   15.00
  -3  23   0    5.50   14.90
  -3  23   0   17.20    9.80
   3  23   0   28.90   13.30
  -3  23   0   34.60   14.90
  -3  23   0   23.00    7.50
  -3  23   0   26.10    7.30
   3  23   0   24.40    7.60
   3  23   0   22.50   11.90
   3  23   0  -10.80   12.10
   3  23   0   33.40   18.00
  -4 -23   0    2.10   12.80
   4 -23   0   18.80    9.10
   4 -23   0   26.10   12.70
   4 -23   0  -18.10   14.00
  -4 -23   0   -0.50    8.50
   4 -23   0   19.90   11.30
   4 -23   0   -3.70   11.50
  -4 -23   0   23.50   10.70
  -4 -23   0    0.30    7.00
  -4 -23   0    0.60   10.60
  -4  23   0    9.30    5.70
   4  23   0    7.70   25.20
  -4  23   0    2.30   13.60
  -4  23   0   22.80   13.20
   4  23   0   -1.00   11.10
   4  23   0    2.10    6.20
   4  23   0   23.60   12.70
   4  23   0  -10.00   11.90
  -4  23   0   23.50    9.20
  -4  23   0    3.70   12.90
  -4  23   0   10.00    6.20
   5 -23   0   45.20   16.30
  -5 -23   0   16.90   11.20
   5 -23   0    4.20   15.20
   5 -23   0   13.00   14.60
  -5 -23   0   23.50   12.00
   5 -23   0   32.20   12.80
   5 -23   0   27.40   10.40
  -5 -23   0   19.20   14.50
  -5 -23   0   15.80    9.60
  -5  23   0   30.00   15.80
   5  23   0  -71.19   39.30
  -5  23   0    1.60   18.20
  -5  23   0   48.60   15.80
   5  23   0   30.60   10.80
   5  23   0    9.50    7.00
   5  23   0   17.00    8.50
  -5  23   0   25.60    6.40
  -5  23   0   47.70   15.20
   5  23   0   16.50   13.60
  -5  23   0   24.70    7.90
   0 -24   0   16.20   11.40
   0 -24   0  -27.10   15.70
   0 -24   0   -0.20    6.20
   0 -24   0  -20.20   11.30
   0  24   0    0.20    5.00
   0  24   0   -6.10   13.50
   0  24   0   60.29   19.00
   0  24   0    8.50    8.20
   1 -24   0   -7.90   10.00
   1 -24   0   -0.10    8.60
  -1 -24   0    6.00   10.80
  -1 -24   0    7.70    8.90
  -1 -24   0    0.10   10.60
  -1 -24   0    5.10    6.90
  -1 -24   0    2.10   17.40
   1 -24   0   -4.10   11.60
   1 -24   0   12.10   10.00
   1  24   0    3.50    8.50
  -1  24   0   11.30    6.80
   1  24   0   24.70   21.00
  -1  24   0  -20.50   11.50
  -1  24   0    2.00    6.00
  -1  24   0   23.30   12.60
   1  24   0   -9.10    8.80
  -1  24   0   15.90    9.40
   1  24   0    8.30    5.50
   1  24   0    3.80   11.80
  -1  24   0   -5.40   13.50
  -2 -24   0  -22.30   15.90
   2 -24   0   -3.70    6.40
  -2 -24   0   30.50   12.30
  -2 -24   0   13.60   10.60
   2 -24   0   30.50    9.90
  -2 -24   0   10.20    9.00
   2 -24   0   33.50   14.60
   2 -24   0   -3.20   15.20
   2 -24   0   10.70   10.40
  -2 -24   0   -9.90    9.30
  -2  24   0  -16.30   13.50
   2  24   0    9.20    9.70
   2  24   0   -9.50    9.10
   2  24   0    1.60    5.90
   2  24   0   -3.70   15.30
   2  24   0   -3.10   10.00
  -2  24   0  -16.30   10.30
  -2  24   0    6.60    5.90
  -2  24   0    7.70    5.80
  -2  24   0   -6.70   14.60
   3 -24   0    6.60    9.10
   3 -24   0    4.60   15.60
   3 -24   0    5.60   14.20
  -3 -24   0  -22.10   16.50
  -3 -24   0   -5.30    9.60
  -3 -24   0    9.60   11.00
   3 -24   0   14.00   12.30
  -3 -24   0   16.30    7.20
  -3 -24   0   -2.20    8.50
   3 -24   0   20.80   12.10
  -3  24   0   -2.50    4.70
  -3  24   0   -7.90   18.50
  -3  24   0  -12.10   10.60
  -3  24   0    5.50    6.10
   3  24   0    4.70    6.40
   3  24   0   38.30   31.70
   3  24   0  -15.10   12.80
   3  24   0    0.20    7.80
   3  24   0    1.10    8.00
  -3  24   0  -34.20   23.80
  16   0  -1    3.10   10.60
  16   0  -1   15.10   21.10
 -16   0   1    5.40    6.70
  16   0  -1    8.60    8.40
  16   0  -1   -1.70    5.70
 -16   0   1   -5.00    7.80
 -16   0   1   -3.50    7.60
 -16   0   1    5.70    9.60
  16   0  -1   -9.60   17.30
 -15   0   1    0.20    9.20
  15   0  -1  -17.20    8.60
 -15   0   1    1.60    5.90
 -15   0   1    3.70    9.50
  15   0  -1    2.00   10.50
 -15   0   1    2.20    5.70
  15   0  -1   -5.20   18.90
  15   0  -1   16.00    8.20
  15   0  -1    4.70    8.80
 -14   0   1   17.20    8.80
  14   0  -1   -0.30    6.20
  14   0  -1    1.70    6.60
 -14   0   1    9.50    9.40
 -14   0   1    1.60    9.20
  14   0  -1  -12.90   10.70
  14   0  -1    5.90   23.10
 -14   0   1    1.70   13.40
 -14   0   1   16.60   12.30
 -14   0   1    0.90    5.00
  14   0  -1   10.60   10.10
  14   0  -1    5.50    8.80
  13   0  -1    9.60    8.50
  13   0  -1    5.60    7.00
 -13   0   1    8.90    9.40
  13   0  -1   -0.60    8.40
  13   0  -1   -0.40   21.50
  13   0  -1    4.60    7.60
 -13   0   1    6.70    7.50
 -13   0   1    9.60    6.90
 -13   0   1   -6.30   12.90
 -13   0   1   -8.50    8.50
  12   0  -1    7.20    8.30
 -12   0   1   12.20    7.30
  12   0  -1    7.90    7.60
  12   0  -1   23.00   14.80
  12   0  -1   -0.50    7.90
 -12   0   1   -1.50    5.70
 -12   0   1    0.90    5.20
 -12   0   1    1.00    9.90
  12   0  -1  -13.70   19.60
  12   0  -1    4.90    6.70
 -12   0   1   -3.10    8.60
 -12   0   1    0.50    6.00
 -11   0   1   -4.70    5.30
  11   0  -1    1.50    5.50
 -11   0   1   -1.60    6.20
  11   0  -1   -3.80    5.50
  11   0  -1   15.70    8.20
  11   0  -1    8.10    7.50
 -11   0   1   -3.60    4.40
 -11   0   1   -0.80    7.60
 -11   0   1   -3.90    8.20
  11   0  -1    5.80    9.20
  11   0  -1   -1.70   18.00
 -11   0   1   20.10    9.20
 -10   0   1    5.90    7.90
  10   0  -1    2.90    4.80
  10   0  -1   12.40    8.10
  10   0  -1   -2.60    6.80
 -10   0   1   -5.90    7.00
  10   0  -1   10.80    7.70
  10   0  -1   -2.70   11.40
 -10   0   1    7.30   13.00
 -10   0   1    6.50    8.40
 -10   0   1   -0.80    5.90
 -10   0   1    3.70    6.70
  10   0  -1    0.00   17.20
  -9   0   1    7.80    6.60
  -9   0   1    6.90    4.20
  -9   0   1   -4.90    6.40
  -9   0   1   -5.00    3.40
  -9   0   1   -8.10    7.10
   9   0  -1   -2.50    6.30
   9   0  -1    9.10    4.90
   9   0  -1   -9.00    9.90
   9   0  -1    0.20   14.80
   9   0  -1   11.30    6.00
   9   0  -1   11.20    7.50
  -9   0   1    2.80    5.80
   8   0  -1   -2.10    5.20
  -8   0   1    2.90    4.90
   8   0  -1   -4.60    5.60
  -8   0   1   -7.60    9.70
  -8   0   1    1.10    5.10
  -8   0   1   -3.00    3.50
  -8   0   1  -11.60    7.40
  -8   0   1   -0.60    3.30
   8   0  -1   -4.90    5.20
   8   0  -1   -6.60   12.00
   8   0  -1    0.40    5.60
   8   0  -1    2.50    5.70
   7   0  -1    0.30    7.20
   7   0  -1    1.30    4.70
   7   0  -1    0.00    7.30
  -7   0   1   -4.40   10.60
  -7   0   1   -3.70    6.00
   7   0  -1    4.20    5.90
   7   0  -1    2.20    4.80
  -7   0   1   -3.30    3.50
   7   0  -1    1.60    3.40
  -7   0   1   -3.80    2.80
  -7   0   1    2.50    3.20
  -7   0   1    3.30    4.70
  -6   0   1   -2.70    5.60
   6   0  -1   -3.40    2.80
   6   0  -1    1.00    3.90
  -6   0   1   -3.80    3.60
  -6   0   1   -0.60    5.40
  -6   0   1   -3.50    3.80
   6   0  -1   -6.00    6.20
  -6   0   1   -0.80    3.90
  -6   0   1   -2.30    7.10
   6   0  -1   -0.80    3.30
   6   0  -1   -5.60    4.00
   6   0  -1   -8.50    3.90
   5   0  -1   -3.40    8.60
   5   0  -1    4.70    3.90
   5   0  -1    2.10    3.90
  -5   0   1   -2.90    5.50
   5   0  -1  -15.40   11.70
  -5   0   1    2.10    3.90
   5   0  -1   -4.50    4.10
  -5   0   1    1.00    2.80
  -5   0   1   -1.50    3.20
   5   0  -1   -1.60    2.60
  -5   0   1   -5.80    6.90
  -5   0   1    0.20    3.10
  -4   0   1   -0.40    2.50
   4   0  -1    1.30    2.30
  -4   0   1   -3.20    2.80
  -4   0   1   -9.90    6.10
  -4   0   1   -2.60    3.60
   4   0  -1    1.20    2.50
   4   0  -1    4.20    3.80
  -4   0   1   -6.10    3.40
   4   0  -1   -4.00    3.30
  -4   0   1    0.00    3.50
   4   0  -1   -5.60    5.40
   4   0  -1   -0.50    5.20
  -3   0   1   -0.70    2.40
  -3   0   1   -3.70    1.70
  -3   0   1    2.30    4.60
   3   0  -1    0.70    4.50
   3   0  -1   -1.10    2.20
   3   0  -1   -2.10    2.50
   3   0  -1    2.80    2.70
  -3   0   1    0.70    2.80
  -3   0   1   -3.60    3.80
   3   0  -1    1.30    2.90
   3   0  -1   -2.60    2.60
  -3   0   1    0.20    1.60
  -2   0   1    0.20    1.40
  -2   0   1   -0.20    1.00
  -2   0   1    0.20    2.90
   2   0  -1   -2.90    2.10
  -2   0   1    0.90    1.40
   2   0  -1    4.50    2.50
   2   0  -1   -0.70    1.90
   2   0  -1   -2.10    1.20
   2   0  -1    1.00    2.30
  -2   0   1   -0.90    1.90
   2   0  -1    0.70    1.50
   2   0   1    2.70    1.60
  -2   0  -1   -0.80    1.40
  -2   0  -1   -2.50    1.40
  -2   0  -1   -0.10    1.90
  -2   0  -1   -4.20    3.80
   2   0   1   -1.90    1.30
  -2   0  -1   -0.70    1.30
   2   0   1    0.40    1.40
  -2   0  -1    0.60    1.90
   2   0   1   -0.30    2.10
   2   0   1    1.00    2.80
   2   0   1    3.70    2.30
   3   0   1    0.50    2.30
  -3   0  -1   -0.60    3.30
  -3   0  -1   -1.20    3.10
   3   0   1   -0.40    3.80
   3   0   1   -2.00    2.00
   3   0   1    3.10    2.60
  -3   0  -1    1.20    4.70
  -3   0  -1   -0.80    2.70
   3   0   1    2.50    5.00
   3   0   1   -5.20    2.70
  -3   0  -1   -0.10    2.10
  -3   0  -1   -2.30    2.10
   4   0   1    0.60    3.60
  -4   0  -1    2.80    3.50
   4   0   1    5.10    5.40
   4   0   1    2.20    3.70
   4   0   1   -1.30    2.40
   4   0   1    1.30    9.20
  -4   0  -1   -0.80    2.60
  -4   0  -1   -2.00    2.50
  -4   0  -1    0.30    1.90
   4   0   1    2.30    3.40
  -4   0  -1    2.10    4.30
  -4   0  -1    0.40    5.70
  -5   0  -1   -7.90    4.30
   5   0   1    1.20    4.10
   5   0   1   -6.10    9.80
   5   0   1    2.10    3.80
  -5   0  -1   -2.00    6.30
   5   0   1    5.80    6.10
  -5   0  -1   -2.10    2.50
  -5   0  -1   -0.20    2.10
  -5   0  -1    1.50    3.00
  -5   0  -1   -1.10    3.30
   5   0   1    1.80    3.90
   5   0   1   -4.00    3.70
  -6   0  -1   -4.20    2.80
  -6   0  -1    4.60    3.30
   6   0   1    0.90    4.00
   6   0   1   -1.50    3.00
   6   0   1   -1.90   10.40
  -6   0  -1   -0.80    5.10
   6   0   1   -0.90    4.50
  -6   0  -1    0.50    6.30
  -6   0  -1    1.70    3.40
   6   0   1    1.00    3.10
  -6   0  -1    3.60    3.20
   6   0   1    0.50    4.20
   7   0   1    0.10    3.10
   7   0   1    9.40    9.00
  -7   0  -1   -2.20    4.50
   7   0   1    5.80    6.00
  -7   0  -1   -9.70    5.80
   7   0   1   -0.70    7.40
  -7   0  -1   10.10    5.70
   7   0   1    0.70    4.80
  -7   0  -1   -6.70    6.80
   7   0   1   -4.00    4.50
  -7   0  -1   -6.60    3.60
  -7   0  -1    8.40    5.60
   8   0   1    3.70    6.00
  -8   0  -1    0.80    5.20
   8   0   1    3.10    6.00
   8   0   1   -1.80    5.50
  -8   0  -1   -0.50    5.70
   8   0   1   -5.20    8.40
   8   0   1    4.80   13.50
  -8   0  -1    0.50    7.40
  -8   0  -1   -2.10   11.20
  -8   0  -1    4.40    5.60
   8   0   1    9.70    5.70
  -8   0  -1    2.60    4.60
   9   0   1    4.40    5.20
  -9   0  -1   -2.60    6.00
  -9   0  -1    1.50    5.10
   9   0   1    2.10    4.60
  -9   0  -1    5.00   13.10
   9   0   1    0.90    4.20
   9   0   1    0.70   16.50
  -9   0  -1   -0.20    6.60
   9   0   1    1.30   10.40
  -9   0  -1   -2.00    8.30
  -9   0  -1    1.60    6.40
   9   0   1   -5.40    6.50
 -10   0  -1   18.10   14.30
 -10   0  -1   -8.10    8.70
 -10   0  -1   -0.80    5.50
  10   0   1    5.60    4.90
 -10   0  -1    4.80    8.70
 -10   0  -1   -2.20    5.40
  10   0   1   10.30    6.00
 -10   0  -1    1.50    7.10
  10   0   1   -3.20    4.80
  10   0   1   -4.90   12.40
  10   0   1   11.50   11.90
  10   0   1    1.00    5.30
  11   0   1   -9.20    5.50
  11   0   1    1.80    7.50
  11   0   1    4.00   20.30
  11   0   1   -3.40    4.40
 -11   0  -1   -2.20    7.80
  11   0   1   10.20   13.30
 -11   0  -1   -2.80   10.10
  11   0   1    0.80    5.50
 -11   0  -1    2.30    5.50
 -11   0  -1    3.60    6.20
 -11   0  -1   -3.30    3.80
 -11   0  -1   -9.20   13.30
  12   0   1   10.20   13.70
  12   0   1    5.80    7.40
  12   0   1  -12.30   20.10
  12   0   1   -4.30    7.80
 -12   0  -1   -1.30    6.20
 -12   0  -1    9.80   10.40
 -12   0  -1    5.70    6.60
  12   0   1    2.60    6.70
 -12   0  -1    8.90    7.20
  12   0   1    4.30    6.30
 -12   0  -1   -3.40    5.70
 -12   0  -1    5.10   14.00
 -13   0  -1    5.60    8.80
 -13   0  -1   -6.00    5.50
 -13   0  -1   20.00   12.10
  13   0   1  -10.00    5.70
  13   0   1    1.20    8.80
  13   0   1   -4.80    8.50
 -13   0  -1    7.90   11.30
 -13   0  -1    6.10    8.00
 -13   0  -1    9.00    7.30
  13   0   1   10.10   16.00
  13   0   1   -4.70    5.60
  13   0   1   -2.20   13.30
  14   0   1    2.90    9.20
  14   0   1   12.50   16.60
 -14   0  -1    4.20    9.40
  14   0   1    6.30    8.80
  14   0   1    4.40    9.30
  14   0   1   -3.10    5.40
 -14   0  -1   13.70   10.70
  14   0   1    8.00   15.60
 -14   0  -1   -1.60    5.20
 -14   0  -1    1.50    9.50
 -14   0  -1   -1.70    4.70
  15   0   1   10.40   10.30
  15   0   1    0.10    5.70
 -15   0  -1    3.40   10.40
 -15   0  -1   -0.50    7.40
  15   0   1    3.50   17.90
 -15   0  -1   -6.20    9.20
  15   0   1   -2.40   24.50
 -15   0  -1   -3.00    5.40
  15   0   1    4.10    9.60
  16   0   1    1.70    8.80
 -16   0  -1   10.20    8.20
  16   0   1   31.50   29.30
  16   0   1  -13.90   18.50
  16  -1  -1   -1.10   10.50
 -16  -1   1   31.50   14.20
  16  -1  -1  -16.60   16.30
 -16  -1   1    7.30   11.10
  16  -1  -1  -35.70   31.40
 -16  -1   1   -2.50   11.80
  16   1  -1    5.00    9.80
 -16   1   1   12.80    9.10
 -16   1   1   42.60   14.10
  16   1  -1   -6.00   18.90
  16   1  -1   14.10    8.20
  15  -1  -1    7.70    7.40
  15  -1  -1   -6.50    9.70
 -15  -1   1    1.10   14.30
  15  -1  -1  -17.00    8.70
 -15  -1   1   -1.10    5.40
 -15  -1   1    9.70    9.40
  15  -1  -1    7.10   28.30
  15  -1  -1    3.80    6.40
  15  -1  -1  -15.60   23.70
  15   1  -1    4.80    9.20
 -15   1   1   17.00   10.80
  15   1  -1    1.80    8.80
 -15   1   1  -10.00    5.90
 -15   1   1   16.50    9.10
  15   1  -1   -8.20    9.00
 -15   1   1    9.80    8.60
 -15   1   1   -0.10    6.00
  15   1  -1    0.10   17.30
  15   1  -1   16.40    9.10
 -14  -1   1    9.10    6.70
  14  -1  -1   -2.60   22.30
  14  -1  -1    1.70    8.30
 -14  -1   1   -9.10    8.80
  14  -1  -1    2.60    7.20
  14  -1  -1   -5.10    6.20
  14  -1  -1    1.40    4.30
 -14  -1   1   -1.80    6.40
 -14  -1   1    1.20    5.00
  14  -1  -1   -6.90   10.50
 -14  -1   1   21.10   14.00
 -14  -1   1    6.00   15.00
  14   1  -1   -8.60    6.00
  14   1  -1   -6.50    8.50
 -14   1   1   -0.20    9.70
  14   1  -1   -1.60   12.10
 -14   1   1    8.80    7.40
 -14   1   1    2.40   10.60
  14   1  -1    1.30    9.80
 -14   1   1    9.80    8.40
  14   1  -1  -18.10   22.00
 -14   1   1   -1.40    5.10
  14   1  -1    5.80    8.50
 -13  -1   1   -0.50    7.70
  13  -1  -1    6.60    6.90
 -13  -1   1    8.40    5.80
 -13  -1   1    2.60    8.60
 -13  -1   1    8.80    7.40
 -13  -1   1    9.30   10.40
  13  -1  -1    2.40    6.00
  13  -1  -1   -6.50    8.50
 -13  -1   1    9.20    9.10
  13  -1  -1    1.80   21.60
  13  -1  -1  -11.30    7.00
 -13   1   1    4.70    8.00
 -13   1   1   18.10   12.80
 -13   1   1   11.90    8.10
  13   1  -1   -6.00   15.40
  13   1  -1   -6.90    7.90
 -13   1   1    3.60    6.50
  13   1  -1  -11.70    8.30
  13   1  -1   14.70    9.30
  13   1  -1   -8.30    4.50
 -13   1   1   12.80   14.60
 -13   1   1    0.20    9.10
  13   1  -1   16.90   22.60
  12  -1  -1   -7.40    8.20
  12  -1  -1    9.60   20.90
 -12  -1   1   -2.00    4.70
 -12  -1   1    0.90    4.70
 -12  -1   1    3.30    8.30
  12  -1  -1   -5.90    8.50
  12  -1  -1    6.70    5.70
 -12  -1   1    2.00    9.00
  12  -1  -1   -8.20    8.00
  12  -1  -1   -9.40    7.40
 -12  -1   1   11.00    8.30
 -12  -1   1   15.00   12.10
  12   1  -1   -8.60    6.30
  12   1  -1    0.90    8.80
 -12   1   1    2.60    9.40
 -12   1   1   -7.70    6.20
 -12   1   1    3.90    5.50
  12   1  -1    9.40    6.30
 -12   1   1    5.00    6.30
  12   1  -1    2.10    5.50
  12   1  -1    3.60   14.70
 -12   1   1  -10.40   10.80
  12   1  -1    7.40   21.70
 -12   1   1    0.40    6.10
 -11  -1   1   13.40   14.20
 -11  -1   1   15.90    7.00
  11  -1  -1    1.40    8.90
 -11  -1   1   17.90    7.50
 -11  -1   1    1.10    6.60
  11  -1  -1    2.90    5.10
  11  -1  -1    7.00    5.80
  11  -1  -1    6.50   12.40
  11  -1  -1    5.50    4.90
 -11  -1   1    3.40   13.60
  11  -1  -1   -0.20   13.00
 -11  -1   1    5.40    7.50
 -11   1   1   18.40   11.20
 -11   1   1   16.80    8.90
 -11   1   1    3.00    5.10
 -11   1   1    6.90    5.90
  11   1  -1   26.50   15.10
  11   1  -1    3.80    7.70
 -11   1   1    5.20   11.50
 -11   1   1   13.60    7.90
  11   1  -1    5.60   19.30
  11   1  -1   16.10    6.20
  11   1  -1   18.10    8.10
  11   1  -1    6.60    7.20
  10  -1  -1    2.70   12.30
 -10  -1   1   -4.00   12.60
 -10  -1   1    8.30    6.70
  10  -1  -1    2.80    7.70
  10  -1  -1    1.10    7.50
 -10  -1   1   -1.40   10.80
 -10  -1   1    2.50    7.80
  10  -1  -1   -0.80    7.30
 -10  -1   1    3.70    6.20
  10  -1  -1    9.40    5.60
  10  -1  -1    6.40    4.70
 -10  -1   1    5.10    8.00
  10   1  -1    4.70    5.20
 -10   1   1    8.90    7.90
  10   1  -1   13.30   17.50
 -10   1   1    5.00    7.30
  10   1  -1    8.50   12.70
  10   1  -1    7.10    8.00
 -10   1   1  -10.80   12.30
 -10   1   1  -13.80    9.60
  10   1  -1    3.10    5.10
 -10   1   1   -1.00    5.90
 -10   1   1    9.50    6.20
  10   1  -1   12.20    5.90
  -9  -1   1  126.39   17.70
   9  -1  -1  130.19   10.90
   9  -1  -1  126.09   11.40
  -9  -1   1  124.49   11.60
  -9  -1   1  132.49   11.50
   9  -1  -1  129.39   17.80
  -9  -1   1  126.39   11.70
   9  -1  -1  120.49   18.10
   9  -1  -1  129.59   12.50
  -9  -1   1  134.89   13.20
  -9  -1   1  142.89   19.90
   9  -1  -1  133.39   13.20
   9   1  -1  128.29   11.90
   9   1  -1  143.39   20.30
   9   1  -1  139.09   18.90
   9   1  -1  145.29   17.30
  -9   1   1  143.79   12.10
  -9   1   1  118.89   10.90
   9   1  -1  135.59   13.00
  -9   1   1  128.19   17.00
  -9   1   1  117.89   16.50
  -9   1   1  146.69   13.50
  -9   1   1  138.79   11.50
   9   1  -1  122.39   10.90
  -8  -1   1   -3.80    3.00
   8  -1  -1   -5.50    7.00
  -8  -1   1   -2.80    6.60
   8  -1  -1   14.50   12.80
   8  -1  -1    1.60    5.80
  -8  -1   1  -11.30    8.20
  -8  -1   1   -6.00    3.10
   8  -1  -1   -4.40    5.50
   8  -1  -1   -5.60    5.20
  -8  -1   1    7.10    5.60
   8  -1  -1   -9.30    4.90
  -8  -1   1   -7.70    5.30
  -8   1   1   -7.30    5.40
   8   1  -1    0.70    6.40
  -8   1   1    2.80    4.00
   8   1  -1    1.90    4.00
   8   1  -1    1.40    5.00
  -8   1   1   -2.10    6.80
   8   1  -1    1.00    5.40
   8   1  -1    4.00    4.60
   8   1  -1   -7.90    8.20
  -8   1   1    0.90    2.90
  -8   1   1    0.60    3.50
  -7  -1   1   -2.30    8.60
  -7  -1   1    6.50    4.80
   7  -1  -1    5.40    4.20
  -7  -1   1   -3.40    7.20
   7  -1  -1    7.30   11.30
  -7  -1   1    1.60    4.20
   7  -1  -1    4.10    5.20
  -7  -1   1    4.70    5.30
   7  -1  -1    4.10    5.30
   7  -1  -1   -1.30    4.70
  -7  -1   1    3.50    4.30
   7  -1  -1   13.70    5.10
  -7   1   1   -7.60    8.30
   7   1  -1    5.60    5.30
   7   1  -1    0.10    3.50
  -7   1   1    1.60    3.20
  -7   1   1    6.40    5.10
   7   1  -1    2.30    7.90
  -7   1   1   -9.60    6.50
  -7   1   1   -3.00    3.20
   7   1  -1   -2.40    5.40
  -7   1   1    5.40    5.70
   7   1  -1    1.10    3.30
   7   1  -1   10.00    5.10
  -6  -1   1   22.30    7.50
  -6  -1   1   22.30    5.90
   6  -1  -1   30.80    9.00
   6  -1  -1   25.20    5.10
   6  -1  -1   23.80    6.00
   6  -1  -1   29.60    5.90
  -6  -1   1   30.00    5.30
  -6  -1   1   30.60    5.50
  -6  -1   1   31.40    9.60
  -6  -1   1   30.60    7.90
   6  -1  -1   26.30    6.40
   6  -1  -1   25.40    5.90
   6   1  -1   33.50    9.20
  -6   1   1   31.50    9.60
   6   1  -1   28.10    4.80
  -6   1   1   34.90    6.20
   6   1  -1   29.40    6.40
   6   1  -1   31.80    4.80
   6   1  -1   25.10    5.30
   6   1  -1   31.10    7.00
  -6   1   1   20.30    7.60
  -6   1   1   27.60    5.80
  -6   1   1   22.50    5.20
  -6   1   1   33.10    5.30
  -5  -1   1  111.29    8.10
  -5  -1   1  128.49    9.20
   5  -1  -1  110.49    8.80
   5  -1  -1  112.69    9.70
  -5  -1   1  113.29    8.20
  -5  -1   1  104.69   10.80
   5  -1  -1  116.29   12.20
   5  -1  -1  120.49    8.10
   5  -1  -1  115.59    9.00
   5  -1  -1   97.09   11.00
  -5  -1   1  115.99    7.90
  -5  -1   1  116.99   11.50
  -5   1   1   95.89    9.60
  -5   1   1  112.29    7.60
  -5   1   1  107.19    7.90
   5   1  -1  115.59    8.10
  -5   1   1  124.59    9.00
   5   1  -1  144.79    9.50
  -5   1   1  105.99    8.60
   5   1  -1  122.09   11.50
   5   1  -1  124.89    7.70
   5   1  -1  122.19    8.40
  -5   1   1  114.89   13.00
   5   1  -1  125.99   14.90
  -4  -1   1   -4.90    3.40
   4  -1  -1    2.90    4.00
  -4  -1   1   -2.90    6.30
   4  -1  -1    1.10    9.10
   4  -1  -1    0.50    3.60
  -4  -1   1   -0.20    3.70
   4  -1  -1    1.80    3.00
  -4  -1   1    1.60    4.80
  -4  -1   1    0.80    2.60
   4  -1  -1   -1.30    3.40
  -4   1   1   -0.40    3.40
   4   1  -1    0.40    2.30
  -4   1   1    0.30    3.50
  -4   1   1  -11.00    5.50
   4   1  -1   -0.30    2.50
   4   1  -1    1.90    2.70
   4   1  -1   -0.20    3.20
  -4   1   1    3.40    3.60
   4   1  -1    1.10    5.50
  -4   1   1   -0.90    2.10
   4   1  -1   -4.80    4.10
  -3  -1   1  306.87   14.60
  -3  -1   1  290.07   12.70
   3  -1  -1  305.67   12.40
   3  -1  -1  325.27   13.00
  -3  -1   1  300.37   12.40
   3  -1  -1  335.47   13.00
   3  -1  -1  319.57   11.80
  -3  -1   1  331.07   13.00
  -3  -1   1  347.37   15.40
   3  -1  -1  312.47   18.30
  -3  -1   1  316.07   12.50
   3  -1  -1  292.07   14.40
  -3   1   1  305.77   11.50
   3   1  -1  333.97   12.10
   3   1  -1  291.77   12.50
  -3   1   1  312.07   12.80
   3   1  -1  332.87   14.80
  -3   1   1  337.87   15.50
   3   1  -1  311.47   12.80
   3   1  -1  339.07   14.90
  -3   1   1  318.47   12.80
  -3   1   1  303.37   14.10
  -3   1   1  327.87   12.70
   3   1  -1  307.07   12.50
  -2  -1   1   72.29    4.60
  -2  -1   1   73.89    4.70
  -2  -1   1   76.99    5.20
  -2  -1   1   69.39    5.70
   2  -1  -1   66.99    5.80
   2  -1  -1   71.09    4.30
   2  -1  -1   69.69    4.40
   2  -1  -1   70.69    3.70
   2  -1  -1   73.79    4.30
   2  -1  -1   69.49    6.20
   2   1  -1   70.39    4.30
  -2   1   1   66.39    6.00
   2   1  -1   73.49    4.30
  -2   1   1   70.99    5.70
   2   1  -1   69.19    3.80
  -2   1   1   67.89    3.50
   2   1  -1   63.49    4.10
  -2   1   1   69.29    4.20
  -2   1   1   74.69    5.00
   2   1  -1   69.09    6.00
  -2  -1  -1   76.29    6.50
  -2  -1  -1   79.09    4.60
  -2  -1  -1   71.29    4.90
  -2  -1  -1   79.09    6.70
   2  -1   1   73.49    4.40
  -2  -1  -1   75.59    3.50
   2  -1   1   79.69    4.90
   2  -1   1   71.39    6.40
   2  -1   1   71.09    4.50
  -2  -1  -1   73.59    4.60
   2  -1   1   71.09    4.40
   2  -1   1   70.59    4.00
  -2   1  -1   74.89    4.60
   2   1   1   70.49    4.50
   2   1   1   71.59    6.60
   2   1   1   74.79    3.40
   2   1   1   78.39    5.00
  -2   1  -1   71.59    4.50
  -2   1  -1   65.09    4.20
  -2   1  -1   84.79    4.80
   2   1   1   68.89    6.50
  -2   1  -1   72.29    4.20
   2   1   1   72.29    4.70
  -2   1  -1   75.89    7.30
   3  -1   1    0.90    2.30
   3  -1   1   -2.90    2.00
  -3  -1  -1    2.30    7.00
  -3  -1  -1    2.00    2.40
   3  -1   1    0.10    2.70
   3  -1   1   -2.40    3.10
   3  -1   1   -0.60    4.70
   3  -1   1    0.40    2.30
  -3  -1  -1   -3.50    2.90
  -3  -1  -1    1.40    2.90
  -3  -1  -1    0.00    4.70
  -3  -1  -1   -0.30    1.70
  -3   1  -1   -2.30    3.00
   3   1   1    2.60    5.40
  -3   1  -1    2.40    3.20
   3   1   1    0.60    1.80
  -3   1  -1    2.00    2.20
   3   1   1   -3.00    3.00
   3   1   1    2.30    5.20
  -3   1  -1   -2.00    2.30
   3   1   1   -1.20    3.10
   3   1   1   -2.90    2.80
  -3   1  -1    1.30    4.60
  -3   1  -1   -0.90    2.60
   4  -1   1  138.79    8.60
   4  -1   1  131.19    8.90
   4  -1   1  126.09    9.50
  -4  -1  -1  115.09    8.50
   4  -1   1  133.69   14.80
  -4  -1  -1  138.49   14.50
   4  -1   1  110.29    7.70
  -4  -1  -1  121.09    6.90
  -4  -1  -1  135.89    8.20
  -4  -1  -1  127.59    8.60
  -4  -1  -1  129.19    9.90
   4  -1   1  135.89    8.50
   4   1   1  134.79    7.10
  -4   1  -1  125.09    8.80
   4   1   1  146.59   15.20
  -4   1  -1  141.09    8.30
   4   1   1  139.69   14.90
   4   1   1  126.79    7.70
   4   1   1  132.49    8.10
   4   1   1  134.89    8.80
  -4   1  -1  134.99    8.80
  -4   1  -1  133.89   12.00
  -4   1  -1  132.49    8.40
  -4   1  -1  120.59    8.90
   5  -1   1   35.70   10.80
   5  -1   1   37.90    9.40
   5  -1   1   32.50    5.90
  -5  -1  -1   35.30    7.30
  -5  -1  -1   50.49   11.50
  -5  -1  -1   38.80    6.40
  -5  -1  -1   33.00    5.40
   5  -1   1   31.00    5.90
   5  -1   1   31.20    4.70
   5  -1   1   36.20    5.90
  -5  -1  -1   15.60    5.40
  -5  -1  -1   38.00    5.50
   5   1   1   41.20    6.40
   5   1   1   31.60    5.30
   5   1   1   39.30    9.70
  -5   1  -1   32.00    5.10
   5   1   1   33.40   10.30
  -5   1  -1   43.70    5.90
  -5   1  -1   28.60    5.30
   5   1   1   35.40    6.00
   5   1   1   35.90    4.90
  -5   1  -1   31.50    6.40
  -5   1  -1   40.10   13.80
  -5   1  -1   26.30    5.90
  -6  -1  -1   69.09    6.60
   6  -1   1   77.49    7.20
   6  -1   1   79.69    8.90
   6  -1   1   72.19    8.10
   6  -1   1   74.69    8.80
  -6  -1  -1   73.79    8.90
  -6  -1  -1   72.39    7.60
   6  -1   1   82.29   12.90
  -6  -1  -1   77.99    9.30
  -6  -1  -1   79.79   11.70
   6  -1   1   81.59   11.50
  -6  -1  -1   65.09    7.30
  -6   1  -1   75.39    9.00
   6   1   1   84.29    7.00
  -6   1  -1   69.79   11.20
   6   1   1   75.79   10.70
   6   1   1   79.59    8.70
  -6   1  -1   72.19    7.60
   6   1   1   79.19    8.40
   6   1   1   72.99    8.40
  -6   1  -1   67.39    6.60
  -6   1  -1   64.09    7.80
   6   1   1   80.79   12.90
  -6   1  -1   76.19    6.70
   7  -1   1  106.99    9.10
  -7  -1  -1  121.69   17.60
  -7  -1  -1   89.99   12.80
  -7  -1  -1  117.99    9.00
   7  -1   1  113.99   19.00
   7  -1   1  114.59   10.90
  -7  -1  -1  117.89    9.80
   7  -1   1  107.99   13.00
  -7  -1  -1  114.59   11.00
   7  -1   1  125.99   17.20
  -7  -1  -1  107.89    8.80
  -7   1  -1  119.79   14.70
   7   1   1  118.39    9.20
   7   1   1  118.89   15.60
   7   1   1  115.69   10.70
  -7   1  -1  120.89    9.70
  -7   1  -1  128.09   10.10
  -7   1  -1  116.39   11.00
   7   1   1  103.49   15.60
   7   1   1  121.79   12.00
   7   1   1  100.19    8.60
  -7   1  -1   96.09   10.40
  -7   1  -1  107.89    8.50
  -8  -1  -1  145.39   12.20
   8  -1   1  159.88   12.30
  -8  -1  -1  162.68   11.30
  -8  -1  -1  176.78   12.70
   8  -1   1  156.58   19.20
  -8  -1  -1  157.58   11.30
   8  -1   1  152.68   12.60
   8  -1   1  154.68   16.00
  -8  -1  -1  158.28   16.70
   8  -1   1  161.58   12.50
  -8  -1  -1  188.58   19.00
   8  -1   1  162.88   12.70
  -8   1  -1  160.48   12.10
   8   1   1  162.48   23.00
   8   1   1  145.99   12.20
  -8   1  -1  155.88   17.60
   8   1   1  154.88   11.60
   8   1   1  168.98   13.20
  -8   1  -1  178.38   13.10
  -8   1  -1  151.98   12.30
  -8   1  -1  181.88   21.40
   8   1   1  159.58   18.60
  -8   1  -1  166.58   11.30
   9  -1   1    4.60    7.00
   9  -1   1    6.30    5.10
   9  -1   1   -3.90    6.20
  -9  -1  -1    9.30    8.80
  -9  -1  -1    4.30    5.10
  -9  -1  -1   -0.20    4.80
  -9  -1  -1    5.10    7.00
   9  -1   1    7.20    7.30
  -9  -1  -1   11.30    7.60
   9  -1   1    8.90   12.00
   9  -1   1   10.10    9.60
  -9  -1  -1    6.50    9.60
  -9   1  -1    6.80    5.10
   9   1   1    9.60    7.40
  -9   1  -1   -3.60    6.70
   9   1   1   -1.60   16.20
  -9   1  -1   -3.80    8.40
   9   1   1   12.10   11.60
   9   1   1    5.50    6.10
  -9   1  -1    4.20    4.60
   9   1   1    9.70    7.30
  -9   1  -1   -2.30   12.40
  -9   1  -1    6.70    5.70
   9   1   1   -2.10    4.30
  10  -1   1   14.90    5.50
 -10  -1  -1    0.60    5.70
  10  -1   1   10.20    7.20
 -10  -1  -1    3.80    7.70
 -10  -1  -1    3.40    6.10
 -10  -1  -1    6.50    7.60
  10  -1   1   14.40    8.90
 -10  -1  -1   14.20   11.40
  10  -1   1    5.10   10.90
  10  -1   1    8.40    5.40
  10  -1   1   24.30   19.50
 -10  -1  -1   -3.70    6.90
  10   1   1    7.90    7.60
  10   1   1    7.70    5.00
 -10   1  -1    6.00    8.80
 -10   1  -1    4.10    7.90
 -10   1  -1    7.80    4.80
  10   1   1   -1.80   13.10
 -10   1  -1   -1.20    4.70
  10   1   1    3.90    5.60
 -10   1  -1   -1.90    9.40
  10   1   1   10.00   12.90
  10   1   1   10.60    6.80
 -10   1  -1    5.80   13.80
  11  -1   1    1.30    4.20
 -11  -1  -1    8.80    6.40
  11  -1   1   18.60    8.80
 -11  -1  -1    9.90   15.00
  11  -1   1    8.80   25.00
 -11  -1  -1    6.60    8.20
  11  -1   1   -4.70    8.80
  11  -1   1    1.80    5.30
 -11  -1  -1   12.20    7.00
 -11  -1  -1    8.90   10.10
  11  -1   1   -2.70   11.20
 -11  -1  -1    5.10   10.90
  11   1   1    4.50    6.40
 -11   1  -1   -1.60   10.30
  11   1   1  -11.30   13.40
  11   1   1   10.10    7.80
 -11   1  -1   16.30    8.40
  11   1   1   22.10   14.50
 -11   1  -1   -4.10    5.10
 -11   1  -1    1.70    7.60
  11   1   1    8.70    6.20
  11   1   1    8.50    7.90
 -11   1  -1   -3.80    6.20
 -11   1  -1   -9.40   13.20
 -12  -1  -1   11.30    9.60
  12  -1   1   -1.00   21.40
 -12  -1  -1   10.30    7.70
 -12  -1  -1    4.30    9.40
 -12  -1  -1   12.60    6.90
  12  -1   1    4.20    5.70
  12  -1   1   16.60   13.50
  12  -1   1   10.50    9.40
  12  -1   1   -8.20    6.80
  12  -1   1   10.50    9.10
 -12  -1  -1    9.60    9.50
 -12  -1  -1   21.10   15.30
 -12   1  -1   -0.70    9.00
 -12   1  -1    8.10    5.30
  12   1   1    3.80   14.70
  12   1   1    7.60    7.20
  12   1   1   10.60    6.70
 -12   1  -1   10.30    6.80
 -12   1  -1   16.90   11.90
  12   1   1    6.80    7.90
 -12   1  -1   14.80    8.00
 -12   1  -1   13.80   11.50
  12   1   1    8.60    6.50
  12   1   1   18.40   21.40
 -13  -1  -1   15.00   19.10
 -13  -1  -1    4.40    9.20
  13  -1   1   20.10   16.90
  13  -1   1   -0.30    6.00
  13  -1   1   -1.20    4.90
  13  -1   1   16.20   13.20
  13  -1   1   13.60   10.00
 -13  -1  -1    3.60    9.20
 -13  -1  -1    7.30    5.00
 -13  -1  -1   13.80    6.60
 -13  -1  -1   30.10   13.50
  13   1   1   13.50    6.90
 -13   1  -1   20.30   11.20
  13   1   1    3.70    4.90
 -13   1  -1    8.30    7.90
  13   1   1    3.60   14.80
 -13   1  -1    2.50    6.00
  13   1   1    9.40   15.60
 -13   1  -1    7.90    9.20
 -13   1  -1    6.40    6.60
  13   1   1    6.30    6.90
  13   1   1   -5.80    6.50
 -13   1  -1   12.50   12.10
  14  -1   1   -3.10    8.60
 -14  -1  -1   -5.10   15.60
 -14  -1  -1   -4.00    6.40
  14  -1   1   15.70   10.10
  14  -1   1    2.30    9.50
  14  -1   1   -2.20   15.90
  14  -1   1    0.20   14.70
 -14  -1  -1    2.90    6.50
 -14  -1  -1   -7.40    8.70
  14  -1   1    9.70    7.00
 -14  -1  -1   -2.40    5.30
  14   1   1    0.00    6.70
 -14   1  -1   -3.50    5.60
 -14   1  -1   -9.00    7.70
  14   1   1   -6.70    7.60
  14   1   1   15.90    8.90
  14   1   1   11.90    9.30
  14   1   1   -2.70   16.50
 -14   1  -1    1.80    6.30
  14   1   1    9.20   22.50
 -14   1  -1    5.10   11.70
 -14   1  -1    0.20    5.40
 -15  -1  -1    5.10    7.10
 -15  -1  -1  -10.40    9.00
 -15  -1  -1    7.30    6.30
 -15  -1  -1   -4.10   15.60
  15  -1   1    4.70   16.30
  15  -1   1   27.60   26.90
  15  -1   1   -6.50    9.10
  15  -1   1    0.80    7.80
 -15   1  -1   -2.90    6.70
  15   1   1   12.30   27.50
 -15   1  -1    9.60   10.90
  15   1   1    3.60    6.80
  15   1   1   10.00   10.30
  15   1   1   -1.60    8.70
 -15   1  -1   -2.80    7.40
 -15   1  -1   -5.60    6.30
  15   1   1  -17.00   19.00
 -15   1  -1  -20.20    7.20
  16  -1   1    3.80    9.50
  16  -1   1   -2.00   27.20
 -16  -1  -1   11.50   12.90
  16  -1   1   -4.10    9.20
 -16  -1  -1    5.30    7.60
  16   1   1   -8.30   11.50
  16   1   1  -13.40   18.10
 -16   1  -1   -4.70    7.40
 -16   1  -1    0.00    7.80
  16   1   1   24.50   31.20
  16   1   1   -1.80    6.20
 -16   1  -1    6.80   15.60
  16   1   1    5.40    9.80
 -16   1  -1   23.50    9.30
 -16  -2   1    7.60    7.50
 -16  -2   1    6.30   15.10
  16  -2  -1    0.30   11.40
  16   2  -1   11.20   20.30
 -16   2   1    9.60    8.70
  16   2  -1   -0.80    9.20
 -16   2   1   29.50   13.70
 -15  -2   1    2.40    8.40
  15  -2  -1    9.60   11.10
 -15  -2   1   15.30   12.70
 -15  -2   1   14.60    7.70
  15  -2  -1   -1.40    9.80
  15  -2  -1   -6.80   24.30
  15  -2  -1   -2.40    8.80
 -15  -2   1   -5.70    7.30
 -15   2   1   12.00    8.90
  15   2  -1    9.20   18.90
 -15   2   1    6.20   10.50
  15   2  -1    6.90    7.20
 -15   2   1    2.80    8.50
  15   2  -1   -5.50    5.30
  15   2  -1  -16.10   11.50
  15   2  -1    1.20    9.10
 -15   2   1   24.20   15.90
  15   2  -1    6.00    9.80
  14  -2  -1   29.00    9.10
 -14  -2   1   29.80   10.90
  14  -2  -1   55.89   13.70
 -14  -2   1   50.69    8.80
  14  -2  -1   53.69   11.90
  14  -2  -1   35.00   10.10
 -14  -2   1   37.30   10.60
  14  -2  -1   53.09   27.30
 -14  -2   1   44.40   15.20
  14  -2  -1   58.69   17.70
 -14  -2   1   78.69   18.10
 -14   2   1   30.80   13.80
 -14   2   1   82.79   18.00
 -14   2   1   43.20   12.50
  14   2  -1   53.39   26.40
 -14   2   1   44.00   11.90
 -14   2   1   31.00   12.40
  14   2  -1   43.10   12.00
  14   2  -1   44.70   10.50
  14   2  -1   26.00    8.50
 -14   2   1   45.00   10.50
  14   2  -1   47.70   11.30
  14   2  -1   32.10   33.30
 -13  -2   1   39.10    9.70
 -13  -2   1   38.70   10.20
 -13  -2   1   21.80    9.40
  13  -2  -1   27.80   22.70
 -13  -2   1   54.09   17.80
  13  -2  -1   13.40    8.40
  13  -2  -1   37.10    9.70
 -13  -2   1   48.20   14.70
  13  -2  -1   46.20   11.00
  13  -2  -1   40.20   10.30
  13   2  -1   25.60   11.60
  13   2  -1   22.60   10.60
  13   2  -1   25.20    9.60
 -13   2   1   25.20    8.30
 -13   2   1   23.10   10.40
 -13   2   1   53.39   16.10
 -13   2   1   28.70    8.20
  13   2  -1   43.40   24.70
 -13   2   1   29.50    8.00
  13   2  -1   31.70   18.80
 -13   2   1   48.90   28.80
  13   2  -1   36.30    9.90
 -12  -2   1   13.00    6.30
  12  -2  -1    6.20    7.70
  12  -2  -1    9.10    7.40
 -12  -2   1    6.70    7.50
 -12  -2   1   10.40   10.20
 -12  -2   1   -4.50    6.50
  12  -2  -1   -8.30    8.00
  12  -2  -1   17.80   15.70
  12  -2  -1    7.50   12.20
 -12  -2   1    1.50   10.30
  12  -2  -1   -2.00    5.10
 -12  -2   1   10.00    7.20
  12   2  -1   14.20    7.90
  12   2  -1   18.90   32.10
  12   2  -1   14.10    9.00
 -12   2   1   12.20    8.10
  12   2  -1    1.60   15.80
  12   2  -1    6.90    6.50
 -12   2   1   -4.10   12.30
  12   2  -1    3.90    4.60
 -12   2   1   10.50   10.60
 -12   2   1   10.20    8.70
 -12   2   1    6.10    8.10
 -12   2   1    3.30    6.40
  11  -2  -1    7.40    6.80
 -11  -2   1    7.80    6.40
 -11  -2   1    0.80   12.40
  11  -2  -1   -3.10   10.80
  11  -2  -1    4.50    6.80
 -11  -2   1    1.60    5.40
 -11  -2   1   -0.80    7.40
  11  -2  -1    0.30    4.60
  11  -2  -1   -7.80   12.90
 -11  -2   1   12.50    7.50
  11  -2  -1    3.40    5.60
 -11  -2   1  -19.60   10.10
 -11   2   1  -11.30   13.30
  11   2  -1    6.10    7.10
 -11   2   1    0.60    7.90
  11   2  -1   -1.00    5.40
  11   2  -1   -6.10    6.70
 -11   2   1   -0.70    4.90
  11   2  -1   13.50   14.10
  11   2  -1   -1.70   14.70
 -11   2   1    7.90    5.60
  11   2  -1    7.80    7.50
 -11   2   1   -8.20    8.40
 -11   2   1   -0.20    7.40
  10  -2  -1   51.39   10.60
  10  -2  -1   54.29   11.00
  10  -2  -1   46.90    9.50
  10  -2  -1   31.60    7.30
  10  -2  -1   62.89   13.20
 -10  -2   1   61.19   15.10
 -10  -2   1   45.00    8.40
  10  -2  -1   63.19   16.30
 -10  -2   1   49.00   10.60
 -10  -2   1   54.69   10.50
 -10  -2   1   49.10   15.70
 -10  -2   1   39.90    7.00
  10   2  -1   65.09   11.10
  10   2  -1   49.20   19.60
  10   2  -1   47.80    8.60
 -10   2   1   35.70    7.90
 -10   2   1   50.19   13.40
 -10   2   1   37.50   13.90
  10   2  -1   45.10   16.30
 -10   2   1   52.19   10.40
  10   2  -1   55.49    8.60
 -10   2   1   71.99   11.30
 -10   2   1   52.29    7.90
  10   2  -1   51.09    8.80
  -9  -2   1   28.80    6.90
   9  -2  -1   47.00    8.30
   9  -2  -1   38.60   16.50
  -9  -2   1   52.19   14.50
  -9  -2   1   57.09    9.80
   9  -2  -1   45.30    8.80
  -9  -2   1   35.30   12.00
  -9  -2   1   39.80    7.80
  -9  -2   1   44.80    8.50
   9  -2  -1   49.00    9.90
   9  -2  -1   46.40   11.20
   9  -2  -1   50.69    7.60
  -9   2   1   59.29    9.70
  -9   2   1   37.20   10.20
  -9   2   1   40.30    7.90
   9   2  -1   46.40    8.90
   9   2  -1   56.59    9.20
  -9   2   1   42.20    8.40
   9   2  -1   41.80    8.40
   9   2  -1   47.00    7.90
   9   2  -1   43.70   11.60
   9   2  -1   55.19   18.00
  -9   2   1   52.39   14.90
  -9   2   1   46.30    8.30
  -8  -2   1  129.29   14.50
  -8  -2   1  121.09   11.00
   8  -2  -1  130.29   20.00
   8  -2  -1  118.29   11.80
  -8  -2   1  127.79   10.70
   8  -2  -1  134.49   11.30
   8  -2  -1  130.89   11.10
  -8  -2   1  148.99   17.90
  -8  -2   1  143.79   11.40
   8  -2  -1  129.49   15.00
  -8  -2   1  138.79   10.60
   8  -2  -1  153.38   12.80
  -8   2   1  133.59   16.20
  -8   2   1  143.19   10.60
   8   2  -1  146.79   10.40
  -8   2   1  138.79   11.90
  -8   2   1  123.89   11.70
   8   2  -1  135.49   12.20
  -8   2   1  136.09   12.30
   8   2  -1  149.49   17.30
   8   2  -1  134.79   15.50
   8   2  -1  132.59   12.20
  -8   2   1  137.09   16.10
   8   2  -1  135.49   10.70
  -7  -2   1   46.80   11.80
   7  -2  -1   61.59    8.60
   7  -2  -1   53.49    7.50
   7  -2  -1   40.20    8.80
  -7  -2   1   47.70    6.80
  -7  -2   1   47.80    6.80
   7  -2  -1   48.50   11.40
  -7  -2   1   56.09    8.40
  -7  -2   1   49.60   11.10
   7  -2  -1   52.59    7.10
  -7  -2   1   48.70    8.70
   7  -2  -1   59.69    8.70
   7   2  -1   54.99    8.30
   7   2  -1   53.59   13.50
   7   2  -1   47.40    7.00
  -7   2   1   48.90    7.80
   7   2  -1   49.10    7.40
  -7   2   1   42.50    6.40
  -7   2   1   40.50   10.10
  -7   2   1   47.10    6.60
  -7   2   1   54.69   12.00
   7   2  -1   46.40    5.90
  -7   2   1   57.09   11.60
   7   2  -1   48.10   11.50
   6  -2  -1  111.69   11.50
  -6  -2   1  124.39   13.80
  -6  -2   1  124.69    8.90
   6  -2  -1  132.19   14.20
  -6  -2   1  117.49    9.70
  -6  -2   1  115.39    9.10
  -6  -2   1  110.69    8.10
   6  -2  -1  113.39    9.10
   6  -2  -1  142.29   14.30
  -6  -2   1  122.29   15.10
   6  -2  -1  109.59    8.90
  -6   2   1  110.19    9.70
  -6   2   1  117.69   10.10
   6   2  -1  114.49    8.90
   6   2  -1  118.09   15.70
  -6   2   1  122.19    8.50
  -6   2   1  105.39   11.80
   6   2  -1  116.39   10.40
   6   2  -1  119.19   15.50
   6   2  -1  127.09   10.30
  -6   2   1  126.49   14.40
   6   2  -1  126.69    8.50
  -6   2   1  104.89    9.50
   5  -2  -1   66.19    7.20
   5  -2  -1   57.09    9.80
  -5  -2   1   60.89    6.10
   5  -2  -1   56.99    8.60
   5  -2  -1   66.59    8.20
  -5  -2   1   59.49    6.30
  -5  -2   1   56.09    9.80
  -5  -2   1   62.59    5.60
   5  -2  -1   64.49    5.60
  -5  -2   1   63.59    5.80
   5  -2  -1   67.79    7.30
  -5  -2   1   63.19   11.40
   5   2  -1   71.59    6.50
  -5   2   1   68.39    9.80
  -5   2   1   57.29    7.30
   5   2  -1   73.19   13.20
   5   2  -1   64.09    6.80
   5   2  -1   61.39    6.20
   5   2  -1   62.59    6.40
  -5   2   1   61.79    7.50
  -5   2   1   55.29    9.10
  -5   2   1   56.09    6.20
   5   2  -1   59.49    8.80
  -5   2   1   65.79    5.30
   4  -2  -1    6.10    2.60
   4  -2  -1   -2.20    6.80
  -4  -2   1   12.70    7.00
   4  -2  -1    9.00    5.00
  -4  -2   1    1.60    2.70
   4  -2  -1    7.40    4.90
  -4  -2   1    0.60    4.50
  -4  -2   1    6.30    3.40
  -4  -2   1    9.20    4.20
   4  -2  -1    4.70    2.80
   4  -2  -1   10.70    4.00
  -4   2   1   10.90    2.60
  -4   2   1    9.00    3.20
  -4   2   1    5.20    4.80
  -4   2   1    7.50    3.90
  -4   2   1   -0.90    5.40
   4   2  -1    9.90    3.00
  -4   2   1    1.40    4.10
   4   2  -1    9.00    5.80
   4   2  -1    6.50    4.00
   4   2  -1    8.30    3.10
   4   2  -1    8.50    2.70
   4   2  -1    9.00    6.70
   3  -2  -1  300.27   12.60
   3  -2  -1  278.97   13.70
  -3  -2   1  297.97   15.90
  -3  -2   1  316.07   12.40
   3  -2  -1  328.77   16.60
   3  -2  -1  310.97   12.50
  -3  -2   1  309.37   12.80
   3  -2  -1  305.27   12.60
  -3  -2   1  309.07   12.50
  -3  -2   1  339.07   15.20
   3  -2  -1  297.57   11.40
   3   2  -1  311.07   21.40
  -3   2   1  313.17   11.20
  -3   2   1  301.17   12.70
  -3   2   1  294.67   15.70
   3   2  -1  295.97   12.40
   3   2  -1  305.87   15.00
   3   2  -1  285.67   12.60
   3   2  -1  298.07   12.30
  -3   2   1  315.87   12.60
   3   2  -1  307.97   11.80
   2  -2  -1  681.43   22.50
   2  -2  -1  700.33   24.90
  -2  -2   1  657.93   22.10
  -2  -2   1  728.43   23.00
  -2  -2   1  660.53   21.70
   2  -2  -1  661.13   22.30
   2  -2  -1  672.73   21.00
   2  -2  -1  688.63   22.30
  -2  -2   1  685.13   22.30
  -2  -2   1  700.73   24.30
   2   2  -1  672.43   24.40
  -2   2   1  671.23   22.30
  -2   2   1  685.33   22.40
   2   2  -1  704.43   22.40
   2   2  -1  660.93   21.60
   2   2  -1  681.03   22.20
  -2   2   1  678.13   25.10
   2   2  -1  682.73   23.10
  -2   2   1  676.83   22.40
  -2   2   1  685.33   20.90
   1   2  -1   49.90    5.50
   0   2  -1   -5.00    5.40
  -1  -2  -1  130.59    6.60
  -1  -2  -1  178.98    8.40
   1  -2   1  159.78    6.70
  -1  -2  -1  166.28    7.30
  -1  -2  -1  188.08    9.80
   1  -2   1  180.28    7.90
   1  -2   1  162.08    6.60
   1   2   1  148.19    6.80
  -1   2  -1  142.69    6.70
  -1   2  -1  124.49    6.50
  -1   2  -1  184.18    8.20
   2  -2   1   38.20    4.30
  -2  -2  -1   33.00    4.00
   2  -2   1   34.40    3.10
   2  -2   1   37.30    3.90
  -2  -2  -1   35.70    4.20
   2  -2   1   34.20    3.50
  -2  -2  -1   33.90    3.10
   2  -2   1   35.50    4.00
   2  -2   1   32.20    5.80
  -2  -2  -1   31.40    5.40
  -2  -2  -1   34.30    5.70
  -2   2  -1   29.40    4.20
  -2   2  -1   33.90    4.00
   2   2   1   43.20    4.40
  -2   2  -1   35.40    3.40
   2   2   1   31.90    2.20
   2   2   1   38.20    6.60
  -2   2  -1   36.10    5.10
   2   2   1   30.90    5.60
  -2   2  -1   32.30    4.10
   2   2   1   32.30    3.80
   2   2   1   36.50    4.20
   3  -2   1 1819.02   55.79
  -3  -2  -1 1808.92   56.39
   3  -2   1 1828.72   55.29
   3  -2   1 1860.71   60.19
   3  -2   1 1830.62   56.29
  -3  -2  -1 1857.51   60.39
  -3  -2  -1 1877.71   58.79
   3  -2   1 1998.20   56.49
  -3  -2  -1 1822.22   55.39
   3  -2   1 1833.12   56.49
  -3  -2  -1 1806.42   56.39
  -3   2  -1 1830.92   55.69
  -3   2  -1 1761.32   55.39
  -3   2  -1 1942.81   61.19
   3   2   1 1787.22   62.19
   3   2   1 1799.52   54.09
   3   2   1 1802.92   56.29
  -3   2  -1 1872.51   56.49
  -3   2  -1 1814.72   56.39
   3   2   1 1900.11   56.59
   3   2   1 1777.62   55.29
  -3   2  -1 1709.63   57.59
   4  -2   1   62.09    6.80
   4  -2   1   73.09   10.80
  -4  -2  -1   66.49    4.90
   4  -2   1   65.89    5.70
   4  -2   1   67.59    6.90
  -4  -2  -1   77.29    6.40
  -4  -2  -1   59.29    9.20
  -4  -2  -1   65.29    6.20
   4  -2   1   70.09    7.10
  -4  -2  -1   72.79   12.80
  -4  -2  -1   65.49    6.00
   4  -2   1   82.89    8.40
   4   2   1   69.89    6.70
   4   2   1   66.29    4.80
   4   2   1   61.29    6.70
   4   2   1   78.99    6.40
   4   2   1   80.69   12.70
  -4   2  -1   77.99    7.00
   4   2   1   58.69    9.90
  -4   2  -1   69.59    9.80
  -4   2  -1   66.89    7.00
  -4   2  -1   66.89    6.50
  -4   2  -1   70.19    6.10
  -4   2  -1   73.79    6.90
   5  -2   1   11.20    5.60
  -5  -2  -1   10.20    5.90
  -5  -2  -1    9.90    3.20
  -5  -2  -1   10.10    3.40
   5  -2   1   13.70    4.20
   5  -2   1   12.70    4.70
  -5  -2  -1   22.00    5.40
  -5  -2  -1   18.40   10.10
   5  -2   1   11.60    7.50
   5  -2   1   11.60    4.40
  -5  -2  -1    7.60    6.80
   5  -2   1    1.30    5.00
   5   2   1   16.60   10.80
   5   2   1   14.60    4.00
   5   2   1   13.30    3.20
  -5   2  -1   10.70    4.60
  -5   2  -1    5.90   14.70
   5   2   1    4.90    6.00
  -5   2  -1    9.10    4.50
   5   2   1   15.70    5.00
  -5   2  -1    8.60    3.60
  -5   2  -1   13.50    3.60
   6  -2   1   83.49    8.90
  -6  -2  -1   93.59    9.60
   6  -2   1   82.09    7.40
   6  -2   1   72.09    9.60
   6  -2   1   90.29    9.30
  -6  -2  -1   71.49    7.90
  -6  -2  -1   77.89    8.80
  -6  -2  -1   87.99    6.90
  -6  -2  -1   75.19   11.90
  -6  -2  -1   93.59   15.40
   6  -2   1   77.99    8.90
   6  -2   1   80.39   12.60
  -6   2  -1   84.99    9.00
  -6   2  -1   85.69    7.20
   6   2   1   95.79    8.90
  -6   2  -1   79.29   11.90
  -6   2  -1   81.79    7.30
  -6   2  -1   70.99    8.80
  -6   2  -1   77.09    8.90
   6   2   1   82.09    6.70
   6   2   1   91.59   12.40
   6   2   1   94.89    9.40
   6   2   1   76.99   12.80
   6   2   1   83.79    9.00
  -7  -2  -1   59.79    7.00
   7  -2   1   64.19   13.70
  -7  -2  -1   70.39   12.70
  -7  -2  -1   57.89   10.40
  -7  -2  -1   72.09    9.40
   7  -2   1   64.79    8.70
   7  -2   1   55.09    8.70
   7  -2   1   47.30   11.70
   7  -2   1   52.09    6.90
  -7  -2  -1   56.19    8.70
  -7  -2  -1   51.59    6.60
   7  -2   1   62.99    9.10
   7   2   1   68.19    6.90
  -7   2  -1   50.79    7.70
   7   2   1   49.00    7.70
  -7   2  -1   61.59    7.10
  -7   2  -1   60.49    9.00
   7   2   1   52.79    8.50
  -7   2  -1   56.69   13.50
  -7   2  -1   44.20    7.30
   7   2   1   60.99   13.30
   7   2   1   54.99   11.70
  -7   2  -1   58.69    9.70
   8  -2   1    7.50    5.30
  -8  -2  -1    8.50    6.60
   8  -2   1   14.40    7.10
  -8  -2  -1    3.10    4.20
   8  -2   1    3.40   10.00
  -8  -2  -1   16.50    7.30
   8  -2   1   20.30    7.00
  -8  -2  -1    8.20    5.70
   8  -2   1    5.20    4.30
  -8  -2  -1   12.90    8.50
   8  -2   1    9.20    7.60
  -8  -2  -1   13.00   12.90
  -8   2  -1    8.70    5.70
  -8   2  -1    7.30    8.40
  -8   2  -1    0.10    6.80
   8   2   1   13.80    6.60
  -8   2  -1    7.90    6.60
  -8   2  -1    7.30    6.40
   8   2   1   11.40    7.30
   8   2   1   -7.70    9.20
   8   2   1    5.70    4.60
   8   2   1   16.60    6.50
   8   2   1    4.30   10.90
  -8   2  -1    8.40    6.10
   9  -2   1   82.29   10.70
  -9  -2  -1   69.39    8.70
  -9  -2  -1   92.09   14.80
  -9  -2  -1  101.59   16.30
   9  -2   1  101.99   11.10
  -9  -2  -1   78.29   10.30
   9  -2   1   94.59   12.00
  -9  -2  -1   75.89    9.00
  -9  -2  -1  104.69   10.70
   9  -2   1   86.99   12.70
   9  -2   1   82.99    9.70
   9  -2   1   96.59   21.60
   9   2   1   85.69   11.30
  -9   2  -1  101.89   15.10
   9   2   1  105.59   23.10
  -9   2  -1   87.99   10.30
   9   2   1   94.19   10.50
  -9   2  -1   90.89   16.30
  -9   2  -1   84.79    9.20
   9   2   1   81.39   16.20
  -9   2  -1   90.79   10.30
  -9   2  -1   83.09    9.30
   9   2   1   86.19    9.40
   9   2   1   92.79   11.30
 -10  -2  -1    4.20    7.30
 -10  -2  -1    1.70    8.00
  10  -2   1   12.90    4.90
  10  -2   1    5.60   10.00
  10  -2   1    4.10    5.20
  10  -2   1  -10.00   17.70
  10  -2   1    7.80    7.60
 -10  -2  -1   -0.20    5.30
 -10  -2  -1    1.60   10.60
  10  -2   1   -5.10    8.50
 -10  -2  -1    2.20    5.10
 -10   2  -1   15.40   13.80
  10   2   1    5.00    5.10
 -10   2  -1   13.70    7.20
  10   2   1   13.70   14.00
  10   2   1   10.50    7.80
  10   2   1    5.80    6.30
 -10   2  -1    1.00    5.10
  10   2   1  -10.90   17.40
 -10   2  -1   -2.70    9.10
 -10   2  -1   18.10    9.50
 -10   2  -1   -7.10    7.60
  10   2   1    2.30    5.70
 -11  -2  -1   14.60    8.80
 -11  -2  -1   29.20   16.40
  11  -2   1   14.70    8.00
  11  -2   1   12.30    9.90
  11  -2   1    4.30    6.60
 -11  -2  -1   11.60    6.40
  11  -2   1   24.00   32.10
 -11  -2  -1   11.10   11.30
 -11  -2  -1    7.30    8.60
  11  -2   1    7.80    6.00
  11  -2   1   11.40   11.20
 -11   2  -1   -1.80   13.80
 -11   2  -1    4.50    6.10
 -11   2  -1    9.70   10.80
  11   2   1   11.80    6.40
  11   2   1   10.70   14.10
  11   2   1   -7.50   14.50
 -11   2  -1    0.40    6.80
 -11   2  -1   12.80    8.90
 -11   2  -1    7.20    7.30
  11   2   1   17.10    8.30
  11   2   1   14.20    7.10
  11   2   1   20.20    7.60
 -12  -2  -1   17.10    9.80
  12  -2   1    3.00   20.70
 -12  -2  -1   24.10   14.90
 -12  -2  -1    1.90    9.00
  12  -2   1   12.20    8.00
  12  -2   1   12.60    8.40
 -12  -2  -1    7.70    6.50
  12  -2   1    8.70    6.90
  12  -2   1    7.60   11.50
 -12  -2  -1   18.20    8.30
  12  -2   1    3.80    9.80
 -12  -2  -1    7.50    8.70
 -12   2  -1    8.20    9.10
 -12   2  -1   10.50   11.00
  12   2   1    7.70   20.10
 -12   2  -1   13.80    8.10
  12   2   1   13.70    7.60
  12   2   1    5.10    5.30
  12   2   1  -12.70   14.70
 -12   2  -1    8.70   10.10
  12   2   1    6.50    6.30
 -12   2  -1   -2.20    8.50
 -12   2  -1    2.60    5.00
  12   2   1   -7.80    8.40
  13  -2   1    6.20    9.80
 -13  -2  -1   -0.70    5.60
  13  -2   1    9.40    9.70
 -13  -2  -1    4.80   24.90
 -13  -2  -1    3.00    6.40
 -13  -2  -1    3.60    5.80
  13  -2   1    8.60   16.30
 -13  -2  -1    7.00   11.60
 -13  -2  -1    6.00    5.90
  13  -2   1   -4.40    7.20
 -13   2  -1    8.00   11.60
 -13   2  -1   -4.50    6.00
  13   2   1   -4.20    7.10
 -13   2  -1    0.20    8.30
  13   2   1  -11.60    5.10
  13   2   1    3.70    9.40
  13   2   1    0.40   10.80
 -13   2  -1   13.80   10.10
 -13   2  -1    4.10    7.80
 -13   2  -1   -8.90    6.50
  13   2   1   -0.50    7.50
  13   2   1    0.40   14.40
 -14  -2  -1    7.20    9.50
  14  -2   1   12.00    8.80
 -14  -2  -1    1.40    6.40
 -14  -2  -1  -12.90   13.80
 -14  -2  -1   27.40   13.70
  14  -2   1   -3.70    6.60
  14  -2   1  -14.00    8.20
  14  -2   1   -2.30   16.30
 -14  -2  -1    2.60    6.10
  14  -2   1   -2.00   14.00
  14  -2   1   -5.50    5.50
 -14   2  -1    7.30   15.40
  14   2   1    5.30    6.60
  14   2   1  -10.90    7.40
 -14   2  -1    2.40    5.70
 -14   2  -1    2.70    9.10
  14   2   1   -9.70   18.30
 -14   2  -1    6.40    9.90
  14   2   1    3.90    9.10
  14   2   1   -3.70    6.10
  14   2   1    2.40   17.60
 -14   2  -1   -9.40    8.10
  15  -2   1   -1.30   18.50
 -15  -2  -1    0.90    7.70
 -15  -2  -1   -8.90   15.40
  15  -2   1   22.00   11.10
 -15  -2  -1   21.70    9.10
 -15  -2  -1    5.40    7.80
  15  -2   1    4.50    7.60
  15   2   1    0.40    8.50
 -15   2  -1    4.10    9.60
 -15   2  -1   21.30   15.90
 -15   2  -1    5.60   10.80
  15   2   1    9.10    9.50
  15   2   1    1.20   18.10
 -15   2  -1   21.40    9.00
  15   2   1   22.00   26.30
  16  -2   1    7.20    9.70
 -16  -2  -1    0.60    7.80
  16  -2   1   -3.00   19.10
 -16  -2  -1   -0.40    8.20
 -16  -2  -1   17.50   16.00
  16  -2   1    0.70   11.80
 -16   2  -1    6.90   11.20
  16   2   1    1.20   21.20
  16   2   1    0.20    9.10
 -16   2  -1   36.40   15.80
 -16   2  -1   14.70   11.50
  16   2   1  -11.20   19.50
 -16  -3   1   -4.60    6.10
  16  -3  -1   -5.10   10.40
 -16  -3   1   16.20   12.50
  16  -3  -1  -11.00   31.30
  16  -3  -1  -17.20    8.70
  16  -3  -1    3.40   12.00
 -16  -3   1    8.80   11.00
 -16  -3   1    4.70    8.30
 -16   3   1  -17.00    9.80
 -16   3   1    9.30   10.00
  16   3  -1   -0.70   10.00
 -16   3   1   28.80   10.60
  16   3  -1   35.30   20.80
  16   3  -1   -1.00    9.30
  16   3  -1    0.80    7.10
  16   3  -1  -14.50    8.20
 -16   3   1    7.40    7.00
  15  -3  -1   24.70   12.70
 -15  -3   1   31.80   10.20
  15  -3  -1   16.20   28.50
  15  -3  -1   10.70    8.80
  15  -3  -1    1.80   11.60
 -15  -3   1    9.10    9.40
 -15  -3   1   24.80   17.10
 -15   3   1   26.40   15.90
  15   3  -1    9.70    9.90
  15   3  -1   33.90   25.50
  15   3  -1    2.80   19.90
  15   3  -1   -7.30    8.90
 -15   3   1   15.40    7.60
 -15   3   1   21.80   12.10
  15   3  -1    4.20    9.00
 -15   3   1    7.60    6.50
  14  -3  -1   24.10   24.20
  14  -3  -1    1.50    8.90
  14  -3  -1    2.10    8.10
  14  -3  -1   10.20   11.50
 -14  -3   1   -3.20    9.10
 -14  -3   1   13.80    8.60
 -14  -3   1   -8.40   14.40
  14  -3  -1    3.60   13.90
 -14  -3   1    0.90    5.60
  14  -3  -1   -2.50    5.70
 -14  -3   1    4.10    6.70
  14   3  -1   12.00   19.00
 -14   3   1   -3.70    9.20
  14   3  -1    2.10    7.00
 -14   3   1    0.20    8.00
  14   3  -1    8.80   22.40
  14   3  -1   28.50   11.60
  14   3  -1   22.80   10.20
 -14   3   1    4.60    9.10
 -14   3   1   -8.60    4.60
 -14   3   1    9.30    9.80
  14   3  -1  -12.90    7.50
  13  -3  -1   46.80   12.80
  13  -3  -1   34.30   23.60
  13  -3  -1   32.10   13.40
  13  -3  -1   13.40   11.00
 -13  -3   1   33.70   16.90
 -13  -3   1   40.40    9.80
  13  -3  -1   26.30    7.90
 -13  -3   1   28.40   11.80
 -13  -3   1   57.89   17.10
  13  -3  -1   11.40    6.90
 -13  -3   1   29.10   10.70
 -13   3   1   42.70    8.80
 -13   3   1   47.50   21.80
 -13   3   1   33.10   11.00
  13   3  -1   41.50   15.50
 -13   3   1   33.20   10.30
  13   3  -1   42.60   12.00
  13   3  -1   15.90   22.70
  13   3  -1   20.80    9.20
 -13   3   1   61.09   16.20
  13   3  -1   30.90    9.20
 -13   3   1   13.10    7.60
  12  -3  -1   11.60    9.60
 -12  -3   1   25.80   15.60
  12  -3  -1   18.10    8.00
 -12  -3   1   30.40   10.80
 -12  -3   1   20.00    6.70
 -12  -3   1   11.40    6.30
  12  -3  -1   10.90   10.90
  12  -3  -1   23.20   12.80
  12  -3  -1   19.40   21.20
  12  -3  -1   21.00    9.30
 -12  -3   1   11.60   14.00
  12   3  -1   28.90    8.70
 -12   3   1   16.70   13.00
 -12   3   1   22.60    7.30
  12   3  -1   21.20   13.10
  12   3  -1   11.40    6.60
  12   3  -1    5.90    5.30
 -12   3   1    9.00   13.80
  12   3  -1   25.70    8.60
 -12   3   1    6.50    9.30
 -12   3   1   25.70    7.70
 -12   3   1   17.60    8.80
 -11  -3   1  121.89   13.00
  11  -3  -1  138.79   13.70
 -11  -3   1  117.09   12.60
  11  -3  -1  102.79   12.90
  11  -3  -1  112.69   15.90
 -11  -3   1  119.19   21.00
 -11  -3   1  109.39   16.60
 -11  -3   1  128.89   15.20
  11  -3  -1  124.79   19.10
  11  -3  -1  103.59   12.70
  11  -3  -1  107.69   21.20
 -11   3   1  109.49   12.70
 -11   3   1   98.89   10.40
 -11   3   1  137.99   20.20
 -11   3   1  117.89   21.40
  11   3  -1  116.09   12.00
  11   3  -1  123.89   18.70
  11   3  -1  113.39   12.60
  11   3  -1  118.79   14.90
 -11   3   1  105.79   13.30
 -11   3   1  131.59   15.40
  11   3  -1  151.88   27.10
  11   3  -1   91.19   12.80
  10  -3  -1    3.90    5.20
  10  -3  -1    1.20    6.40
 -10  -3   1    8.80    7.00
 -10  -3   1    3.40   10.20
 -10  -3   1    3.10    6.70
 -10  -3   1    6.90   11.60
  10  -3  -1    5.30    8.80
 -10  -3   1    9.50    4.90
  10  -3  -1    5.40    7.20
  10  -3  -1   10.10    9.30
  10  -3  -1    2.00   11.40
  10   3  -1    6.10   14.80
 -10   3   1   -1.00    7.00
  10   3  -1    9.80   12.90
  10   3  -1   13.20    6.00
 -10   3   1    3.80    5.00
  10   3  -1    2.40    6.50
 -10   3   1    3.10    4.10
 -10   3   1    3.70    5.20
  10   3  -1    2.30    7.10
 -10   3   1  -15.50    9.30
  10   3  -1    8.60    5.60
 -10   3   1   -1.90    7.90
   9  -3  -1   78.69   10.40
  -9  -3   1   99.49   17.30
  -9  -3   1   75.29    8.50
   9  -3  -1   63.69    9.40
   9  -3  -1   84.89   10.90
  -9  -3   1   85.79   11.80
   9  -3  -1  103.49   20.10
  -9  -3   1  100.39   11.20
   9  -3  -1  101.29   12.40
   9  -3  -1   79.79   12.60
  -9  -3   1   89.79   15.20
  -9   3   1   72.79   10.50
  -9   3   1   91.49   15.40
  -9   3   1   85.99   14.50
   9   3  -1   84.49   19.80
  -9   3   1   68.39   10.70
  -9   3   1   84.89    8.40
   9   3  -1   86.09    9.90
   9   3  -1   75.69    8.10
   9   3  -1  111.09   18.00
   9   3  -1   76.19    8.90
  -9   3   1   80.09   10.40
   9   3  -1   83.09   10.20
   8  -3  -1    0.90    5.50
  -8  -3   1    3.00    3.70
   8  -3  -1    1.30    4.80
   8  -3  -1   -7.00    5.80
   8  -3  -1    1.90    7.20
   8  -3  -1   -1.40    3.60
   8  -3  -1   -3.00    8.10
  -8  -3   1   -4.10    7.80
  -8  -3   1   -8.10    5.10
  -8  -3   1   -1.70    6.50
  -8  -3   1   11.20   10.00
   8   3  -1    0.90    4.30
   8   3  -1    0.80    7.70
  -8   3   1   -1.90    5.50
  -8   3   1   -8.00    9.30
   8   3  -1   -4.20    5.20
  -8   3   1   -0.90    5.10
  -8   3   1    0.90    3.20
  -8   3   1    5.10    4.40
   8   3  -1   -1.30    5.50
   8   3  -1    9.70    9.70
   8   3  -1    2.70    4.40
   7  -3  -1  146.99   13.80
   7  -3  -1  160.08   10.20
   7  -3  -1  173.98   11.80
   7  -3  -1  168.78   19.10
   7  -3  -1  143.99   10.90
   7  -3  -1  160.78   12.50
  -7  -3   1  174.58   17.30
  -7  -3   1  144.29    9.60
  -7  -3   1  144.79   16.20
  -7  -3   1  166.48   11.60
   7   3  -1  165.18   18.70
  -7   3   1  132.09   12.60
   7   3  -1  148.39   10.40
  -7   3   1  132.39   14.00
  -7   3   1  154.38   10.00
   7   3  -1  167.28   19.20
   7   3  -1  137.39   10.80
   7   3  -1  162.48   10.40
  -7   3   1  136.99   15.10
  -7   3   1  151.28   11.10
  -7   3   1  150.78   12.10
   7   3  -1  146.99   12.10
  -6  -3   1   88.89    8.30
   6  -3  -1   94.99   10.10
  -6  -3   1  104.29   14.10
   6  -3  -1   96.39   14.80
   6  -3  -1   90.59   10.70
   6  -3  -1  112.09    9.80
   6  -3  -1   90.99   10.90
  -6  -3   1   86.89    8.00
  -6  -3   1   94.69    9.30
   6  -3  -1   98.29    9.80
  -6   3   1   93.69   11.70
   6   3  -1  109.59   15.00
   6   3  -1   99.49    7.80
   6   3  -1   92.69    8.00
  -6   3   1  105.59    7.90
  -6   3   1   85.29    9.10
   6   3  -1   97.19   12.70
  -6   3   1   84.59    9.60
  -6   3   1  100.19    8.40
   6   3  -1  103.29    9.50
  -6   3   1   99.79    8.60
   5  -3  -1  150.68    9.40
   5  -3  -1  134.49    8.50
  -5  -3   1  130.59    9.60
   5  -3  -1  121.59   11.00
   5  -3  -1  139.19   11.10
  -5  -3   1  141.59    9.90
   5  -3  -1  134.59   12.80
  -5  -3   1  113.49   12.10
  -5  -3   1  136.29    8.60
   5  -3  -1  134.29   10.00
  -5  -3   1  146.29   13.60
   5   3  -1  143.49   13.70
  -5   3   1  138.39    8.20
   5   3  -1  127.29    8.50
   5   3  -1  131.79    9.90
   5   3  -1  132.59   10.50
  -5   3   1  120.99   14.10
   5   3  -1  130.99    9.90
   5   3  -1  138.69   14.90
  -5   3   1  128.49    9.00
  -5   3   1  132.29    9.00
  -5   3   1  134.79    9.20
  -4  -3   1    0.70    3.60
   4  -3  -1    8.60    3.30
   4  -3  -1   10.20    4.70
  -4  -3   1    8.00    7.20
   4  -3  -1    3.90    2.80
  -4  -3   1    1.80    4.90
  -4  -3   1    5.10    2.50
  -4  -3   1    8.00    4.30
   4  -3  -1    6.00    4.10
   4  -3  -1    4.60    5.70
   4  -3  -1   -2.90    6.70
   4   3  -1    7.90    2.80
   4   3  -1   -1.50    6.00
  -4   3   1    2.60    2.80
  -4   3   1   -0.80    6.30
  -4   3   1    9.80    4.30
   4   3  -1    9.30    7.70
  -4   3   1    9.20    3.60
   4   3  -1    6.50    3.40
  -4   3   1    9.00    3.10
   4   3  -1   -2.70    4.60
   4   3  -1    9.10    3.40
   3  -3  -1 1925.31   58.29
  -3  -3   1 1838.32   57.89
  -3  -3   1 1906.11   57.99
  -3  -3   1 1826.12   56.89
   3  -3  -1 1889.31   57.99
   3  -3  -1 1925.91   62.39
   3  -3  -1 1890.61   56.29
  -3  -3   1 1962.20   59.79
  -3  -3   1 1875.61   61.29
   3  -3  -1 1910.21   58.19
  -3   3   1 1880.11   62.39
  -3   3   1 1805.02   58.09
   3   3  -1 1774.22   59.49
  -3   3   1 1876.01   57.99
  -3   3   1 1842.72   57.99
   3   3  -1 1964.10   58.19
   3   3  -1 1887.11   58.09
   3   3  -1 1952.90   57.19
   3   3  -1 1936.81   61.09
  -3   3   1 1879.61   56.09
  -2  -3   1    0.50    2.70
   2  -3  -1    1.10    1.50
  -2  -3   1    1.80    2.90
  -2  -3   1    0.80    1.70
  -2  -3   1    1.90    3.20
   2  -3  -1    1.20    2.10
   2  -3  -1   -1.90    2.80
   2  -3  -1    0.10    3.70
   2  -3  -1   -2.20    2.90
   2  -3  -1    4.10    3.60
  -2  -3   1    2.40    3.00
  -2   3   1    1.00    1.40
  -2   3   1    3.20    4.00
   2   3  -1   -0.30    2.70
  -2   3   1    4.40    2.80
  -2   3   1   -0.50    3.10
   2   3  -1    6.00    2.40
   2   3  -1   -0.20    1.80
   2   3  -1    1.50    2.90
   2   3  -1    1.70    2.30
  -2   3   1    0.40    2.70
   2   3  -1    4.70    5.30
  -1  -3   1  438.26   14.80
  -1  -3   1  462.85   15.10
  -1  -3   1  468.75   15.60
   1  -3  -1  477.75   15.90
   1  -3  -1  459.35   18.40
   1  -3  -1  446.56   17.00
  -1  -3   1  422.06   15.90
  -1  -3   1  426.66   17.00
  -1  -3   1  472.05   15.70
   1  -3  -1  454.95   15.60
  -1   3   1  452.35   18.40
  -1   3   1  475.45   15.80
  -1   3   1  440.56   13.80
   1   3  -1  473.45   15.60
   1   3  -1  455.55   15.10
   1   3  -1  432.86   17.40
  -1   3   1  436.46   15.50
   1   3  -1  438.16   15.40
  -1   3   1  415.76   16.80
  -1   3   1  459.95   15.60
   1   3  -1  442.66   16.00
   0  -3  -1   93.69    4.70
   0  -3   1   85.59    5.00
   0  -3  -1   88.29    3.60
   0  -3  -1   84.39    6.10
   0  -3   1   84.49    5.40
   0  -3  -1   93.79    5.30
   0  -3  -1   87.69    6.70
   0  -3   1   93.99    4.70
   0  -3  -1   88.49    4.80
   0  -3   1   82.79    4.60
   0  -3   1   78.99    6.10
   0   3  -1   89.19    4.80
   0   3   1   95.79    4.90
   0   3  -1   76.69    5.80
   0   3   1   89.39    4.80
   0   3  -1   91.49    5.90
   0   3   1  100.59    3.70
   0   3  -1   83.99    5.00
   0   3   1   91.09    5.20
   0   3  -1   87.59    4.80
   0   3   1   85.59    6.80
   0   3  -1   90.69    4.40
  -1  -3  -1  139.79    5.60
  -1  -3  -1  121.99    6.60
  -1  -3  -1  130.79    5.70
  -1  -3  -1  134.49    6.80
  -1  -3  -1  121.59    8.30
   1  -3   1  134.89    6.20
   1  -3   1  134.69    6.40
   1  -3   1  140.59    7.20
   1  -3   1  133.29    7.40
  -1   3  -1  126.79    6.30
  -1   3  -1  138.19    7.40
   1   3   1  128.29    8.30
  -1   3  -1  123.29    6.60
  -1   3  -1  133.19    7.70
   1   3   1  138.19    6.90
  -1   3  -1  125.59    6.00
   1   3   1  134.39    5.70
   1   3   1  130.19    5.60
  -1   3  -1  128.39    6.30
   1   3   1  142.19    7.00
   2  -3   1 2173.48   64.99
   2  -3   1 2150.78   64.39
  -2  -3  -1 2073.09   67.49
   2  -3   1 2160.88   64.99
  -2  -3  -1 2130.19   68.19
  -2  -3  -1 2198.88   65.19
   2  -3   1 2302.17   65.59
  -2  -3  -1 2099.69   64.89
  -2  -3  -1 2161.18   63.79
   2  -3   1 2245.68   67.69
   2  -3   1 2072.59   63.39
  -2   3  -1 2182.78   64.39
   2   3   1 2066.89   64.89
  -2   3  -1 2206.98   67.89
  -2   3  -1 2126.79   64.99
   2   3   1 2295.37   63.99
  -2   3  -1 2175.38   65.09
  -2   3  -1 2229.78   66.09
   2   3   1 2128.89   68.29
   2   3   1 2240.48   65.19
   2   3   1 1967.70   70.19
  -3  -3  -1   11.60    5.90
  -3  -3  -1   15.00    8.10
   3  -3   1   11.40    3.60
  -3  -3  -1   11.20    3.40
   3  -3   1   13.40    2.90
   3  -3   1    9.60    3.90
  -3  -3  -1   11.90    3.60
   3  -3   1   10.30    5.60
   3  -3   1    5.50    4.30
   3  -3   1    5.90    3.90
  -3  -3  -1   12.30    4.10
  -3   3  -1    0.80    6.10
  -3   3  -1    3.70    4.40
   3   3   1   18.20    4.30
   3   3   1    9.60    6.10
  -3   3  -1   10.20    3.60
   3   3   1    6.90    2.30
  -3   3  -1    9.60    5.40
   3   3   1    4.70    2.80
   3   3   1    8.40    5.80
  -3   3  -1   11.70    3.30
   3   3   1   16.70    3.10
  -4  -3  -1   -0.80    2.90
   4  -3   1   -3.10    3.80
   4  -3   1    2.70    6.00
   4  -3   1    4.00    3.60
   4  -3   1   -5.50    3.80
  -4  -3  -1   -0.60    5.90
  -4  -3  -1   -1.80    5.30
  -4  -3  -1    1.50    4.00
  -4  -3  -1    1.30    3.60
   4  -3   1    7.40    9.10
  -4   3  -1   -3.10    5.00
   4   3   1    2.90    6.40
  -4   3  -1   -8.10    3.20
  -4   3  -1    2.00    2.80
   4   3   1    6.80    4.00
   4   3   1   -1.30    1.80
   4   3   1    3.30    2.80
   4   3   1    7.80    6.70
  -4   3  -1   -0.10    2.70
   4   3   1    0.50    2.70
  -4   3  -1   -6.60    7.40
  -5  -3  -1   31.70    8.60
   5  -3   1   39.80    5.80
  -5  -3  -1   38.10    5.80
  -5  -3  -1   33.20    5.60
   5  -3   1   37.30    6.40
   5  -3   1   31.10    5.60
  -5  -3  -1   27.00    8.50
   5  -3   1   30.80    5.30
   5  -3   1   36.50    7.50
  -5  -3  -1   40.50    9.80
   5  -3   1   33.70    9.20
  -5   3  -1   37.90    6.10
   5   3   1   35.40   11.10
  -5   3  -1   34.10    6.30
  -5   3  -1   37.00   10.40
   5   3   1   38.20    6.40
   5   3   1   35.70    6.50
  -5   3  -1   24.60    4.40
  -5   3  -1   27.70    5.30
   5   3   1   41.30    6.00
   5   3   1   36.10    4.20
   5   3   1   32.80    8.10
  -5   3  -1   30.90    6.20
  -6  -3  -1   41.30   11.90
   6  -3   1   28.50    6.50
   6  -3   1   22.40    5.50
   6  -3   1   38.40    6.50
  -6  -3  -1   27.20    6.50
  -6  -3  -1   29.90    5.90
   6  -3   1   35.20    6.10
   6  -3   1   30.80   12.00
  -6  -3  -1   29.80    8.90
   6  -3   1   26.20    7.40
  -6  -3  -1   33.70    7.10
   6   3   1   48.90   11.30
  -6   3  -1   23.00    5.60
   6   3   1   30.00    4.40
   6   3   1   39.50    6.90
   6   3   1   33.00    8.00
  -6   3  -1   37.50    7.10
  -6   3  -1   27.50    8.90
  -6   3  -1   28.50    6.70
   6   3   1   24.10   12.10
  -6   3  -1   33.80    7.00
   6   3   1   31.30    5.10
  -6   3  -1   28.90    6.40
   7  -3   1  285.67   24.40
  -7  -3  -1  281.57   20.50
   7  -3   1  304.17   17.80
  -7  -3  -1  297.77   23.70
  -7  -3  -1  272.77   16.30
   7  -3   1  268.47   14.50
  -7  -3  -1  261.97   16.10
   7  -3   1  252.77   15.90
   7  -3   1  260.07   15.70
  -7  -3  -1  249.48   14.30
  -7   3  -1  277.77   21.30
   7   3   1  292.27   14.80
   7   3   1  250.37   12.70
   7   3   1  267.27   21.70
  -7   3  -1  278.07   16.30
   7   3   1  272.17   24.80
  -7   3  -1  238.38   14.30
  -7   3  -1  288.57   16.30
  -7   3  -1  233.88   15.70
   7   3   1  251.97   22.10
  -7   3  -1  252.27   14.30
   7   3   1  241.88   14.90
  -8  -3  -1  243.88   14.20
   8  -3   1  262.77   15.10
   8  -3   1  275.97   19.50
  -8  -3  -1  273.17   17.40
   8  -3   1  268.87   16.40
   8  -3   1  276.27   17.20
  -8  -3  -1  281.87   16.40
   8  -3   1  243.38   18.00
   8  -3   1  266.77   26.20
  -8  -3  -1  289.77   25.00
  -8  -3  -1  264.77   21.50
  -8   3  -1  262.87   15.80
  -8   3  -1  275.47   14.70
   8   3   1  255.17   13.40
   8   3   1  282.67   17.40
   8   3   1  254.17   22.90
  -8   3  -1  235.08   14.80
  -8   3  -1  249.48   17.10
   8   3   1  251.17   14.90
  -8   3  -1  257.87   16.80
  -8   3  -1  266.47   24.50
   8   3   1  252.57   24.00
   9  -3   1    9.00    7.90
  -9  -3  -1   18.20    6.10
   9  -3   1    7.50    4.90
  -9  -3  -1   29.40   11.70
  -9  -3  -1    9.10    6.70
   9  -3   1   18.20    6.00
   9  -3   1   21.90    6.60
   9  -3   1   14.60    9.10
   9  -3   1   21.00   17.50
  -9  -3  -1   21.30    6.50
  -9  -3  -1    8.90    9.70
  -9   3  -1   11.90   10.40
  -9   3  -1   18.10    5.70
  -9   3  -1   14.10    5.70
   9   3   1   15.60    6.10
   9   3   1   22.90    6.50
  -9   3  -1   17.40    7.00
   9   3   1   22.60   14.30
   9   3   1   26.30    6.00
  -9   3  -1   25.70    7.00
   9   3   1   22.10   13.40
   9   3   1    7.80    5.40
  10  -3   1  166.18   17.20
  10  -3   1  167.98   18.20
 -10  -3  -1  184.38   13.30
 -10  -3  -1  196.18   16.70
  10  -3   1  174.68   15.60
  10  -3   1  208.08   17.00
 -10  -3  -1  172.78   16.40
  10  -3   1  192.48   28.50
  10  -3   1  177.58   15.30
 -10  -3  -1  182.68   21.00
 -10  -3  -1  185.98   18.50
 -10   3  -1  152.28   14.60
  10   3   1  180.48   14.10
  10   3   1  170.78   21.20
  10   3   1  216.18   17.40
 -10   3  -1  174.48   17.50
  10   3   1  162.88   14.20
  10   3   1  178.18   13.10
 -10   3  -1  182.58   13.40
 -10   3  -1  174.58   21.10
 -10   3  -1  199.38   17.10
 -10   3  -1  205.18   17.70
  10   3   1  159.58   23.20
 -11  -3  -1   13.30   16.80
  11  -3   1   21.20    8.90
 -11  -3  -1   11.70    6.70
 -11  -3  -1   17.40   12.00
  11  -3   1   23.50   11.20
  11  -3   1    8.90    7.60
  11  -3   1   29.90   23.90
  11  -3   1   27.50   11.00
 -11  -3  -1   11.80    8.70
  11  -3   1   23.90   10.10
 -11  -3  -1   26.70    8.30
  11   3   1    7.50    7.80
  11   3   1   24.30    7.70
 -11   3  -1   16.50    9.30
  11   3   1   21.90    7.40
  11   3   1    3.10   20.50
 -11   3  -1    4.50   14.00
 -11   3  -1   11.10   10.50
 -11   3  -1    5.00    8.30
  11   3   1   19.40   16.80
 -11   3  -1   35.30    9.00
  11   3   1   13.10    9.40
 -11   3  -1   29.10    8.60
  12  -3   1   12.10    6.50
 -12  -3  -1   23.70    8.20
 -12  -3  -1   18.00   11.90
 -12  -3  -1    9.60    6.80
  12  -3   1   22.70   11.50
  12  -3   1   15.40   20.90
  12  -3   1   11.30    7.60
  12  -3   1   19.40   11.10
 -12  -3  -1   11.80   15.60
 -12  -3  -1   19.70    7.90
  12  -3   1   13.30    7.90
 -12   3  -1    5.00    6.80
  12   3   1   19.10   15.90
  12   3   1   13.80    8.40
 -12   3  -1   11.20   11.50
 -12   3  -1   10.30    7.40
 -12   3  -1   33.80    8.90
 -12   3  -1   25.80   11.50
  12   3   1   12.60    7.00
  12   3   1   12.90   16.80
  12   3   1    8.70    6.60
  12   3   1   18.10    7.20
 -12   3  -1   10.30    7.20
 -13  -3  -1   16.10    9.70
  13  -3   1   11.60    6.50
  13  -3   1    8.80    7.70
 -13  -3  -1    4.50    5.50
  13  -3   1    4.10   10.40
 -13  -3  -1    3.50    8.90
  13  -3   1    5.20   21.40
  13  -3   1   -2.10   13.80
 -13  -3  -1   -0.70    9.50
 -13   3  -1   13.30    9.30
 -13   3  -1    4.60    9.30
  13   3   1   25.70   22.80
  13   3   1    4.80    7.30
 -13   3  -1   18.30   12.20
 -13   3  -1    8.50    7.40
  13   3   1    0.70    5.70
  13   3   1    0.00   17.00
 -13   3  -1   13.90    8.70
  13   3   1   23.10    8.10
  13   3   1    7.40    7.80
 -13   3  -1   34.20   11.90
  14  -3   1   23.00   25.50
 -14  -3  -1   -3.00    9.40
  14  -3   1   -2.30    6.50
  14  -3   1    5.90    6.50
  14  -3   1   -3.10    8.70
 -14  -3  -1    0.30    5.30
  14  -3   1   -4.80   10.20
 -14  -3  -1    1.70    6.30
 -14  -3  -1   -0.10   11.00
 -14   3  -1   -0.70    8.20
  14   3   1    6.80   17.20
 -14   3  -1   11.70    6.80
 -14   3  -1   14.70   10.10
  14   3   1   -2.90    8.30
 -14   3  -1   -2.10    5.90
  14   3   1    2.40    6.60
 -14   3  -1    7.60   15.30
  14   3   1   -6.70    6.90
  14   3   1    2.80   21.40
  14   3   1   -2.60    8.80
  15  -3   1    6.70   19.90
  15  -3   1    7.60   14.50
  15  -3   1    0.20    9.50
  15  -3   1   -2.00    9.50
 -15  -3  -1    1.00    8.40
  15  -3   1   -9.90    5.70
 -15  -3  -1   22.70   12.50
  15  -3   1    3.30   10.60
 -15  -3  -1    2.10   10.50
  15   3   1   -8.90    5.60
  15   3   1    7.60   25.20
  15   3   1    7.60    7.50
 -15   3  -1   17.00   15.10
  15   3   1  -17.70    7.20
  15   3   1    6.30   19.60
 -15   3  -1   10.90    7.20
 -15   3  -1    6.40   11.80
 -15   3  -1   -3.50    5.80
 -16  -3  -1    8.30   11.80
 -16  -3  -1   -4.30    9.60
  16  -3   1    4.20    9.60
 -16  -3  -1   14.80    8.90
  16  -3   1  -13.40    9.80
  16  -3   1   25.20   12.40
  16  -3   1   11.30    8.10
  16  -3   1   -7.30   19.20
 -16  -3  -1   -3.10    8.50
 -16   3  -1    3.10   12.00
 -16   3  -1   24.50   10.80
  16   3   1   -0.80    5.60
 -16   3  -1   12.00    8.70
  16   3   1   18.80   21.60
  16   3   1    7.70   22.40
 -16   3  -1   -3.60    7.50
  16   3   1    1.50    9.00
  16  -4  -1   -0.50   10.70
  16  -4  -1   21.80    9.50
 -16  -4   1   20.70   16.40
  16  -4  -1   -8.80   19.10
 -16  -4   1   17.60    7.80
  16  -4  -1   21.70   10.30
 -16  -4   1    3.10   10.90
  16  -4  -1   16.80   11.00
 -16   4   1   55.89   15.50
 -16   4   1    1.60    9.60
 -16   4   1  -16.90   10.00
 -16   4   1   -8.80   11.00
  16   4  -1   44.00   25.90
  16   4  -1   13.30    8.70
  16   4  -1   13.90   20.40
  16   4  -1   -2.10    9.00
 -16   4   1    9.30    6.90
  16   4  -1   35.10   12.90
  15  -4  -1   -4.40    7.60
 -15  -4   1   11.70    8.50
  15  -4  -1   -5.60    8.90
  15  -4  -1   -9.70   18.50
  15  -4  -1    4.30    7.10
  15  -4  -1    5.90   10.90
 -15  -4   1    4.90   14.10
 -15  -4   1    3.50    7.00
 -15   4   1    1.50   10.20
  15   4  -1    8.00   22.50
 -15   4   1   12.80    8.50
  15   4  -1   -2.50   23.20
 -15   4   1    7.10    6.60
 -15   4   1    7.00    8.70
 -15   4   1    4.00    8.70
  15   4  -1   -8.90   10.00
  15   4  -1    2.00    8.50
  15   4  -1    0.10   10.00
  14  -4  -1   30.00   20.00
  14  -4  -1   31.00   13.40
  14  -4  -1   44.90   15.30
 -14  -4   1   28.80   11.70
 -14  -4   1   61.39   17.60
 -14  -4   1   38.70   17.90
  14  -4  -1   24.10    7.90
 -14  -4   1   30.20   10.90
 -14  -4   1   30.00    8.30
  14  -4  -1   16.10   12.10
  14  -4  -1   27.70   10.60
  14   4  -1   53.59   11.10
 -14   4   1   32.00   10.10
  14   4  -1   23.90   21.40
  14   4  -1   34.20   12.10
  14   4  -1   19.00    8.70
  14   4  -1   23.70   23.50
 -14   4   1   29.70   10.30
 -14   4   1   17.10    7.50
 -14   4   1   55.79   18.40
  14   4  -1   42.60   10.70
 -14   4   1   56.19   13.70
 -13  -4   1   10.00   14.80
 -13  -4   1   19.60   13.40
 -13  -4   1    3.40    6.30
  13  -4  -1    6.90   12.10
 -13  -4   1    4.30    7.10
 -13  -4   1   -5.10    6.70
  13  -4  -1   24.30   10.70
  13  -4  -1    4.80   21.00
  13  -4  -1    8.50    6.60
  13  -4  -1    4.20   11.50
  13  -4  -1   -4.40    8.00
  13   4  -1   -1.50   14.40
  13   4  -1   -5.20    9.00
 -13   4   1    4.10    9.10
  13   4  -1    7.60    7.80
 -13   4   1   12.30    7.70
  13   4  -1   -2.90    5.50
 -13   4   1    8.50    9.10
 -13   4   1   10.90    9.40
  13   4  -1   -0.80    5.90
 -12  -4   1   47.70   15.30
  12  -4  -1   53.89   13.60
 -12  -4   1   49.80   11.40
  12  -4  -1   52.59   13.50
  12  -4  -1   46.20    9.10
  12  -4  -1   93.09   25.20
 -12  -4   1   54.59    8.80
 -12  -4   1   64.79   11.10
 -12  -4   1   60.99   17.20
  12  -4  -1   37.30    9.80
  12   4  -1   48.70    9.10
  12   4  -1   42.70   12.00
  12   4  -1   38.00    9.50
 -12   4   1   57.89   12.30
 -12   4   1   56.39   11.20
  12   4  -1   33.60   38.40
 -12   4   1   53.39   10.70
  12   4  -1   38.70   15.90
  12   4  -1   52.39    9.70
 -12   4   1   63.29   18.10
  11  -4  -1    8.00    9.20
 -11  -4   1    7.40   11.40
  11  -4  -1   14.10   17.50
  11  -4  -1    6.00   10.40
  11  -4  -1   -3.90    7.00
  11  -4  -1   -7.50    6.50
  11  -4  -1    8.20    8.90
 -11  -4   1   -9.60   12.10
 -11  -4   1    4.20    7.80
 -11  -4   1    5.30    8.10
 -11  -4   1    0.50    8.40
 -11   4   1   -2.10   13.20
  11   4  -1   -6.60    5.00
  11   4  -1   -1.20   13.40
 -11   4   1    2.10    5.30
 -11   4   1    2.10    4.50
 -11   4   1    3.60    5.60
  11   4  -1   -0.50    7.30
 -11   4   1    2.20    5.00
  11   4  -1    9.90   17.30
  11   4  -1   12.60    6.70
  11   4  -1    8.00    6.30
 -10  -4   1   72.99   14.00
 -10  -4   1   84.19   10.60
  10  -4  -1   89.99    9.90
 -10  -4   1   77.59   12.40
 -10  -4   1  101.29   18.80
  10  -4  -1   70.79   11.10
  10  -4  -1  111.59   14.10
 -10  -4   1   85.29   11.40
  10  -4  -1   78.39   18.00
  10  -4  -1   82.49   13.20
  10  -4  -1   88.09   13.50
 -10   4   1   73.19    8.50
  10   4  -1   93.29   11.80
 -10   4   1   82.49   16.30
 -10   4   1   63.39   10.50
 -10   4   1  102.79   13.60
 -10   4   1   86.99   12.10
  10   4  -1   76.59   10.20
  10   4  -1  100.79   22.70
  10   4  -1   91.39   19.90
  10   4  -1   92.89   12.90
  10   4  -1   78.39    9.90
   9  -4  -1   49.99    9.50
  -9  -4   1   51.79   14.50
   9  -4  -1   48.20   11.10
   9  -4  -1   56.39   18.00
  -9  -4   1   56.09    9.90
   9  -4  -1   45.90    8.40
  -9  -4   1   36.20   11.80
   9  -4  -1   44.90   10.10
   9  -4  -1   45.40   10.30
  -9  -4   1   58.19    8.30
  -9  -4   1   50.29   10.10
   9   4  -1   60.19    8.30
   9   4  -1   45.20    9.30
  -9   4   1   52.29    8.90
  -9   4   1   53.39    8.40
   9   4  -1   44.80    7.40
  -9   4   1   46.70    8.60
   9   4  -1   46.90   13.10
  -9   4   1   59.69   13.50
   9   4  -1   46.10   14.10
   9   4  -1   24.60    7.20
  -9   4   1   47.40    7.80
  -8  -4   1   29.90    9.80
  -8  -4   1   19.50   12.00
  -8  -4   1   40.40    7.70
   8  -4  -1   27.60    7.80
  -8  -4   1   32.30    6.50
   8  -4  -1   20.90    7.80
   8  -4  -1   19.30   10.30
   8  -4  -1   21.60    8.80
   8  -4  -1   27.50    6.70
   8  -4  -1   31.60    7.20
  -8  -4   1   40.20    9.70
   8   4  -1   24.50    7.70
   8   4  -1   26.80    6.50
   8   4  -1   26.00    6.90
  -8   4   1   39.50    7.60
  -8   4   1   44.90   14.70
   8   4  -1   40.90   13.80
  -8   4   1   32.90    6.60
   8   4  -1   25.30   10.90
  -8   4   1   27.60    9.60
   8   4  -1   22.50    5.40
  -8   4   1   25.00    6.80
  -7  -4   1   17.20    4.10
   7  -4  -1   16.20    6.30
  -7  -4   1   35.40    8.90
   7  -4  -1   30.10    6.90
   7  -4  -1   30.70    9.80
   7  -4  -1   12.40    5.10
   7  -4  -1   20.50    5.70
  -7  -4   1   24.60    7.20
  -7  -4   1   11.80    9.70
  -7  -4   1   24.90    9.40
   7  -4  -1   23.30    6.90
   7   4  -1   23.60    5.60
   7   4  -1   18.90    5.50
  -7   4   1   18.20    6.50
  -7   4   1   16.50    4.10
   7   4  -1   17.00    5.90
  -7   4   1   13.60   10.00
  -7   4   1   21.50    5.40
   7   4  -1   21.10    5.20
   7   4  -1   20.80   11.70
  -7   4   1   18.90    5.70
   7   4  -1   20.80    9.30
   6  -4  -1   75.29    9.10
  -6  -4   1   77.79    7.60
   6  -4  -1   67.79   11.60
   6  -4  -1   72.99    8.50
   6  -4  -1   68.79    7.50
   6  -4  -1   66.49   11.00
  -6  -4   1   79.29   15.80
  -6  -4   1   65.09    8.50
  -6  -4   1   82.09    8.70
  -6  -4   1   69.09   11.60
  -6   4   1   60.29    7.50
  -6   4   1   74.29    8.90
  -6   4   1   66.69    7.40
   6   4  -1   61.09   12.70
  -6   4   1   69.49    6.80
   6   4  -1   75.39    8.70
   6   4  -1   61.69    6.90
   6   4  -1   68.79    7.90
   6   4  -1   77.39    9.00
   6   4  -1   63.39   12.90
  -6   4   1   55.39   10.30
  -5  -4   1   69.09    7.80
  -5  -4   1   73.39   11.00
   5  -4  -1   76.69    6.10
   5  -4  -1   66.69    8.60
   5  -4  -1   71.59   12.60
  -5  -4   1   73.19    7.70
  -5  -4   1   83.69   18.30
   5  -4  -1   64.49    6.80
  -5  -4   1   73.39    7.00
   5  -4  -1   59.69    6.70
  -5   4   1   71.79    6.10
  -5   4   1   64.59   11.50
   5   4  -1   69.39   12.40
   5   4  -1   60.39    6.00
  -5   4   1   80.49    7.60
  -5   4   1   68.29   10.30
  -5   4   1   74.79    8.50
   5   4  -1   66.69    6.50
   5   4  -1   75.59    8.20
   5   4  -1   70.69   10.00
   5   4  -1   78.99    8.00
  -4  -4   1   68.99    6.40
  -4  -4   1   72.99   10.40
   4  -4  -1   79.19    8.00
  -4  -4   1   81.29   13.40
  -4  -4   1   63.99    7.30
   4  -4  -1   67.99    5.90
   4  -4  -1   63.19   10.90
  -4  -4   1   67.69    6.30
   4  -4  -1   66.09    7.30
   4   4  -1   78.89    8.20
  -4   4   1   69.49    5.60
  -4   4   1   70.69    6.30
   4   4  -1   63.59   10.70
  -4   4   1   61.49    8.40
  -4   4   1   63.19    6.10
  -4   4   1   70.89    9.30
   4   4  -1   72.69    5.80
   4   4  -1   90.39   12.90
   4   4  -1   77.59    7.50
  -3  -4   1 1130.99   40.40
  -3  -4   1 1241.08   39.90
  -3  -4   1 1243.68   39.90
   3  -4  -1 1151.68   40.50
   3  -4  -1 1269.17   40.40
  -3  -4   1 1273.17   41.40
   3  -4  -1 1258.77   49.00
   3  -4  -1 1221.68   37.90
   3  -4  -1 1244.68   40.10
  -3  -4   1 1273.47   43.60
   3  -4  -1 1257.87   40.00
  -3   4   1 1214.18   39.90
  -3   4   1 1226.08   44.60
  -3   4   1 1219.78   39.80
   3   4  -1 1167.68   41.40
   3   4  -1 1305.27   40.40
  -3   4   1 1231.28   37.60
   3   4  -1 1296.07   39.10
   3   4  -1 1225.38   40.00
   3   4  -1 1187.48   39.90
  -2  -4   1  844.32   28.90
   2  -4  -1  832.52   28.50
  -2  -4   1  840.12   28.20
   2  -4  -1  855.01   29.40
  -2  -4   1  839.02   28.50
  -2  -4   1  862.51   31.20
   2  -4  -1  848.52   28.40
   2  -4  -1  880.51   38.30
   2  -4  -1  830.32   26.30
   2  -4  -1  914.61   29.30
  -2  -4   1  820.52   29.80
  -2  -4   1  828.62   28.40
  -2   4   1  888.91   28.70
   2   4  -1  807.32   31.20
  -2   4   1  818.32   29.40
  -2   4   1  848.82   28.30
  -2   4   1  843.52   31.90
   2   4  -1  841.02   28.70
   2   4  -1  920.31   27.80
  -2   4   1  899.21   29.10
  -2   4   1  863.51   26.30
   2   4  -1  871.41   28.70
   2   4  -1  878.11   28.40
   2   4  -1  840.42   28.70
   1  -4  -1  319.07   12.40
   1  -4  -1  296.37   13.90
   1  -4  -1  315.97   12.40
  -1  -4   1  299.37   12.20
  -1  -4   1  299.27   11.40
  -1  -4   1  299.27   12.20
  -1  -4   1  300.97   15.10
   1  -4  -1  290.57   14.20
  -1  -4   1  293.27   12.90
   1  -4  -1  294.57   12.20
   1   4  -1  291.07   12.90
   1   4  -1  314.07   12.10
  -1   4   1  290.97   14.80
  -1   4   1  296.47   13.50
  -1   4   1  285.77   11.90
  -1   4   1  335.37   12.80
   1   4  -1  324.77   11.40
   1   4  -1  294.57   15.40
   1   4  -1  306.57   12.30
   0  -4   1    8.60    3.10
   0  -4   1   14.00    3.60
   0  -4  -1   11.90    3.40
   0  -4  -1    7.70    1.50
   0  -4  -1    7.70    3.70
   0  -4  -1    8.50    3.20
   0  -4   1    7.00    3.20
   0  -4  -1   11.70    4.40
   0  -4   1    9.10    3.00
   0  -4  -1    9.80    3.10
   0  -4   1   10.10    2.40
   0   4  -1    9.90    4.30
   0   4  -1    9.00    2.90
   0   4   1    8.70    2.70
   0   4  -1    9.90    2.00
   0   4   1    8.50    3.30
   0   4   1    8.10    2.40
   0   4  -1   13.60    2.80
   0   4  -1   11.50    2.70
   0   4   1    8.30    4.80
   0   4   1   11.30    2.70
   0   4   1    8.60    1.50
   0   4  -1   11.10    4.30
   1  -4   1    4.20    2.50
  -1  -4  -1    6.00    1.90
  -1  -4  -1   12.90    2.80
   1  -4   1    9.00    3.70
   1  -4   1    6.60    3.10
   1  -4   1    6.40    3.30
   1  -4   1   12.10    2.80
  -1  -4  -1    5.50    4.50
  -1  -4  -1    8.40    3.00
  -1  -4  -1   11.20    3.40
  -1   4  -1    9.80    3.70
   1   4   1    8.30    7.60
   1   4   1    7.40    3.20
  -1   4  -1   11.60    3.40
  -1   4  -1    4.60    2.40
  -1   4  -1    9.70    3.30
  -1   4  -1   11.00    3.40
   1   4   1    6.90    2.90
   1   4   1   13.00    2.20
   1   4   1    4.20    2.70
  -2  -4  -1 1096.69   34.60
  -2  -4  -1  946.91   34.00
   2  -4   1 1080.99   34.50
  -2  -4  -1 1031.70   34.40
  -2  -4  -1 1010.70   32.70
  -2  -4  -1 1027.90   38.40
   2  -4   1 1037.50   37.80
   2  -4   1 1029.50   33.00
   2  -4   1 1120.19   35.70
  -2  -4  -1 1065.49   38.00
   2  -4   1 1101.79   34.40
   2  -4   1 1020.80   33.50
  -2   4  -1 1038.60   33.20
  -2   4  -1  999.90   33.90
  -2   4  -1 1059.49   34.50
  -2   4  -1 1089.79   37.10
   2   4   1 1117.89   34.60
   2   4   1 1040.60   37.70
  -2   4  -1 1091.09   35.30
   2   4   1 1041.90   37.40
   2   4   1 1018.70   32.60
   2   4   1 1149.48   33.00
   2   4   1 1072.99   34.50
  -2   4  -1 1082.89   34.50
  -3  -4  -1   11.10    9.00
  -3  -4  -1   14.50    3.80
   3  -4   1   11.20    3.60
   3  -4   1   10.20    4.40
   3  -4   1   11.90    3.50
  -3  -4  -1   17.80    6.80
  -3  -4  -1    9.60    3.30
  -3  -4  -1   12.80    6.40
   3  -4   1    9.10    3.30
   3  -4   1   11.00    5.00
   3  -4   1   17.20    8.10
  -3   4  -1   13.10    5.50
  -3   4  -1    9.20    3.40
  -3   4  -1   12.00    4.60
   3   4   1    6.50    2.50
   3   4   1    8.20    3.30
   3   4   1    5.40    7.60
  -3   4  -1   12.30    4.20
   3   4   1    6.90    3.20
  -3   4  -1    3.70    6.60
   3   4   1   12.10    5.70
   3   4   1    9.80    3.50
  -4  -4  -1  393.36   17.40
  -4  -4  -1  408.36   22.60
   4  -4   1  399.16   17.00
  -4  -4  -1  374.66   17.00
   4  -4   1  382.36   17.50
   4  -4   1  409.56   22.30
  -4  -4  -1  405.96   22.90
   4  -4   1  375.06   15.90
   4  -4   1  371.66   15.80
  -4  -4  -1  397.26   15.90
   4  -4   1  384.46   17.40
   4   4   1  384.66   22.70
   4   4   1  377.16   14.50
   4   4   1  377.16   21.30
   4   4   1  426.06   17.70
   4   4   1  417.76   17.70
  -4   4  -1  395.26   17.50
  -4   4  -1  408.26   17.10
   4   4   1  416.76   16.40
  -4   4  -1  422.76   22.60
  -4   4  -1  415.16   18.20
  -4   4  -1  396.86   15.80
  -5  -4  -1  363.26   23.70
  -5  -4  -1  312.17   15.80
   5  -4   1  376.86   23.00
   5  -4   1  372.66   17.20
   5  -4   1  352.56   16.30
   5  -4   1  330.77   15.30
  -5  -4  -1  309.27   31.90
  -5  -4  -1  340.87   16.40
   5  -4   1  351.46   20.10
  -5  -4  -1  335.17   14.80
   5  -4   1  381.56   17.10
  -5   4  -1  343.17   16.20
   5   4   1  341.47   13.80
   5   4   1  364.56   16.60
   5   4   1  350.16   16.30
   5   4   1  350.56   23.00
  -5   4  -1  342.17   16.20
  -5   4  -1  352.66   21.00
   5   4   1  324.47   20.80
  -5   4  -1  329.07   16.00
   5   4   1  328.57   15.50
  -5   4  -1  346.17   15.40
   6  -4   1  121.39   11.60
   6  -4   1  128.39   11.70
  -6  -4  -1  151.88   14.40
  -6  -4  -1  144.29   10.20
  -6  -4  -1  158.38   15.30
   6  -4   1  152.88   15.90
  -6  -4  -1  143.19   10.40
   6  -4   1  143.49   10.40
  -6  -4  -1  140.29   10.50
   6  -4   1  152.18   12.90
   6  -4   1  143.59   10.50
  -6   4  -1  158.48   11.80
   6   4   1  130.19   15.30
   6   4   1  146.69   15.70
  -6   4  -1  142.59   10.50
   6   4   1  139.29    8.20
  -6   4  -1  140.79   14.90
  -6   4  -1  129.29   10.20
   6   4   1  153.98   10.70
  -6   4  -1  136.99   10.10
   6   4   1  157.68    9.90
   6   4   1  149.39   16.00
  -7  -4  -1  401.76   20.20
  -7  -4  -1  385.96   24.70
  -7  -4  -1  389.96   24.70
  -7  -4  -1  373.26   18.80
   7  -4   1  329.47   20.80
   7  -4   1  382.76   25.30
  -7  -4  -1  382.46   18.00
   7  -4   1  352.36   19.20
   7  -4   1  388.86   20.20
   7  -4   1  369.46   18.40
   7  -4   1  390.06   19.30
   7   4   1  355.46   26.40
  -7   4  -1  346.57   24.30
   7   4   1  358.86   18.60
  -7   4  -1  381.36   17.80
   7   4   1  324.47   24.30
  -7   4  -1  363.06   18.70
  -7   4  -1  375.56   18.50
   7   4   1  361.26   18.20
   7   4   1  370.66   15.80
  -7   4  -1  376.96   19.60
   7   4   1  381.96   20.00
   8  -4   1  135.39   21.60
  -8  -4  -1  117.59   12.50
  -8  -4  -1  122.59   17.90
   8  -4   1  110.89   10.00
   8  -4   1  117.59   12.60
   8  -4   1  110.89   11.70
   8  -4   1  112.79   12.00
  -8  -4  -1  121.59   12.30
  -8  -4  -1   92.79   15.50
  -8  -4  -1  103.79    9.40
   8   4   1  114.99   21.00
   8   4   1  110.99   10.10
  -8   4  -1  112.99   12.30
  -8   4  -1  110.29   16.00
  -8   4  -1  107.09   12.00
   8   4   1  114.79    8.80
  -8   4  -1  116.49   10.90
   8   4   1  113.09   10.90
   8   4   1  128.99   14.30
  -8   4  -1  110.29   10.60
   8   4   1  114.59   17.90
  -9  -4  -1  166.98   14.70
  -9  -4  -1  145.99   20.00
   9  -4   1  153.18   16.20
   9  -4   1  137.29   12.40
  -9  -4  -1  155.98   11.70
   9  -4   1  161.58   14.70
   9  -4   1  140.09   14.40
   9  -4   1  156.18   24.80
   9  -4   1  138.89   12.00
  -9  -4  -1  153.58   13.30
  -9  -4  -1  182.38   23.20
  -9   4  -1  139.29   12.20
  -9   4  -1  151.18   12.80
   9   4   1  152.18   13.00
  -9   4  -1  153.48   14.20
   9   4   1  145.69   13.00
  -9   4  -1  138.39   21.70
   9   4   1  171.08   25.60
   9   4   1  153.88   12.30
  -9   4  -1  150.78   12.70
   9   4   1  141.79   24.30
 -10  -4  -1   98.99   16.60
  10  -4   1  111.69   24.80
  10  -4   1   86.69   14.50
  10  -4   1   90.19   11.80
 -10  -4  -1  102.09   13.70
 -10  -4  -1  100.69   20.30
 -10  -4  -1   90.79   11.80
  10  -4   1   86.29   10.80
 -10  -4  -1   95.39   12.20
  10  -4   1   98.29   14.40
  10  -4   1   98.49   13.60
  10   4   1   71.09   16.00
 -10   4  -1   89.89   13.20
  10   4   1   90.09   13.30
 -10   4  -1   81.39   10.00
  10   4   1   97.59   10.80
  10   4   1  102.89   23.60
 -10   4  -1   80.49   17.10
 -10   4  -1   78.79   10.20
  10   4   1   86.99   10.70
 -10   4  -1   76.09   12.60
  10   4   1   97.69   11.40
 -11  -4  -1  100.59   14.50
 -11  -4  -1   77.79   13.30
 -11  -4  -1  108.79   16.30
  11  -4   1   93.19   11.60
  11  -4   1   90.19   12.90
  11  -4   1   62.49   10.00
 -11  -4  -1   82.99   10.40
  11  -4   1  103.99   14.50
 -11  -4  -1   90.99   21.00
  11  -4   1  114.29   26.00
  11  -4   1   95.29   14.20
 -11   4  -1   90.89   13.80
  11   4   1  104.29   13.50
  11   4   1   95.49   21.60
 -11   4  -1  126.89   14.30
 -11   4  -1   75.59   11.40
 -11   4  -1   98.29   12.60
 -11   4  -1   77.59   20.10
  11   4   1   84.69   11.80
  11   4   1  102.29   12.00
  11   4   1   79.39   11.20
  11   4   1  118.39   22.70
  12  -4   1    1.80    7.60
 -12  -4  -1    3.70    8.90
 -12  -4  -1   10.40    7.80
 -12  -4  -1   -6.40    9.90
  12  -4   1   -9.60   19.40
  12  -4   1    0.80    9.20
  12  -4   1    3.80    7.40
 -12  -4  -1   17.70    8.40
 -12  -4  -1    2.10   12.70
  12  -4   1   13.10   11.00
 -12   4  -1   12.90    8.30
 -12   4  -1   10.60    8.30
  12   4   1    3.80   12.30
  12   4   1    7.60    6.00
  12   4   1   11.50    9.20
  12   4   1    6.90    7.50
  12   4   1   11.30    6.50
  12   4   1    1.40   13.70
 -12   4  -1    4.10   10.20
 -12   4  -1   21.70    9.10
 -12   4  -1   15.30    9.70
  13  -4   1    6.60   15.50
  13  -4   1   17.90   24.40
 -13  -4  -1   46.80   14.90
  13  -4   1   23.00    9.20
  13  -4   1   18.30    7.80
 -13  -4  -1   24.30    7.50
  13  -4   1   14.90    7.70
 -13  -4  -1   13.20    7.80
 -13  -4  -1   12.80    7.30
  13   4   1   57.49   24.80
  13   4   1   11.00    9.60
  13   4   1   26.10   19.40
  13   4   1   17.60    8.00
  13   4   1   15.40    7.40
 -13   4  -1    6.00    6.00
 -13   4  -1   14.40   11.70
  13   4   1   13.30    8.70
 -13   4  -1   38.30    8.10
 -13   4  -1   26.30    9.40
 -13   4  -1   43.80   10.20
  14  -4   1   27.60   25.00
 -14  -4  -1   23.30   18.40
  14  -4   1    2.10   10.90
  14  -4   1   27.70   12.60
 -14  -4  -1   32.70   11.10
 -14  -4  -1    8.30    6.80
 -14  -4  -1    7.50   10.50
 -14  -4  -1   22.00   10.90
  14  -4   1   14.60    9.80
  14  -4   1   18.20   10.40
 -14   4  -1   17.30   10.80
 -14   4  -1    8.80    6.50
  14   4   1   14.00   20.30
  14   4   1   18.50   16.50
  14   4   1    7.70    7.10
  14   4   1   12.20    9.00
 -14   4  -1   23.20    7.40
  14   4   1   14.60    7.50
 -14   4  -1   21.80   16.70
  14   4   1    9.80    7.80
 -14   4  -1   15.20    8.90
  15  -4   1   12.50    9.60
 -15  -4  -1   32.40   18.60
  15  -4   1   39.80   29.20
  15  -4   1    8.30    7.80
 -15  -4  -1   17.70   10.30
  15  -4   1    8.30   10.10
  15  -4   1   23.70   14.20
 -15  -4  -1   15.70   11.20
 -15   4  -1   28.70   11.10
  15   4   1   27.40   22.10
 -15   4  -1   13.20   10.00
  15   4   1   23.20    9.30
  15   4   1   68.19   14.40
 -15   4  -1   27.20   19.70
  15   4   1   17.70    9.10
  15   4   1   12.30   25.60
 -15   4  -1   25.90   12.80
  15   4   1   29.50    9.40
 -15   4  -1   19.40    9.30
 -16  -4  -1   -1.60   15.20
  16  -4   1  -12.20   30.90
 -16  -4  -1   -0.60   12.10
  16  -4   1   23.50   12.30
 -16  -4  -1   30.00   13.40
  16  -4   1  -26.00   14.40
  16  -4   1   -0.90    7.80
  16  -4   1  -10.50    7.70
 -16  -4  -1   -7.00    6.80
 -16   4  -1    4.20    7.00
  16   4   1   -6.40    6.10
 -16   4  -1   10.30    8.00
  16   4   1   13.50   24.10
 -16   4  -1   -8.90   11.20
  16   4   1   -9.90   21.60
  16   4   1   -2.80    7.70
 -16   4  -1    6.20   12.40
 -16  -5   1   -2.40   11.40
  16  -5  -1   -1.50    9.00
  16  -5  -1    2.00    8.80
 -16  -5   1  -13.20    5.10
  16  -5  -1  -28.40   29.60
 -16  -5   1    7.20   10.60
  16  -5  -1   -5.80    7.80
  16  -5  -1  -15.20    5.40
  16   5  -1   30.90   27.00
 -16   5   1    0.10    8.90
  16   5  -1   -1.10    7.00
 -16   5   1    7.00    8.60
  16   5  -1  -17.20    7.60
  16   5  -1   13.80   11.80
 -16   5   1    1.80    8.60
  16   5  -1   -0.30   23.90
 -16   5   1   -9.70    8.50
 -15  -5   1   22.30   10.50
  15  -5  -1   48.60   28.60
 -15  -5   1   45.50   11.40
  15  -5  -1   39.70   13.70
  15  -5  -1   29.00    8.60
  15  -5  -1   53.49   12.40
 -15  -5   1   46.20   16.60
  15  -5  -1   41.90   10.40
  15   5  -1   58.69   25.50
 -15   5   1   21.00    7.40
  15   5  -1   36.10   10.20
  15   5  -1   53.19   27.70
 -15   5   1   72.89   15.20
  15   5  -1   38.70   10.40
  15   5  -1   25.70    9.90
  15   5  -1   36.30   10.40
 -15   5   1   65.49   17.10
 -15   5   1   46.50   11.70
 -15   5   1   42.40   11.50
  14  -5  -1    2.60    8.80
 -14  -5   1   -6.60    5.70
 -14  -5   1   -2.40   10.50
 -14  -5   1    4.30    6.10
 -14  -5   1   43.90   14.30
  14  -5  -1    7.20   10.40
  14  -5  -1   -1.20    9.10
  14  -5  -1   -7.90   12.00
  14  -5  -1   -9.10   15.50
 -14  -5   1    6.40    8.50
  14  -5  -1   10.10   12.40
 -14   5   1  -12.90    7.50
  14   5  -1   20.20   11.00
  14   5  -1   23.20   18.10
 -14   5   1  -12.30    7.20
 -14   5   1    1.60    8.00
  14   5  -1    4.60    6.70
  14   5  -1   -3.90    5.50
  14   5  -1   11.50   21.10
 -14   5   1   10.10   10.70
 -13  -5   1   52.69   15.80
  13  -5  -1   51.79   19.70
  13  -5  -1   63.89   11.00
 -13  -5   1   64.19   13.60
  13  -5  -1   62.19   11.90
  13  -5  -1   48.10    9.50
  13  -5  -1   46.50   14.40
 -13  -5   1   50.29   12.50
  13  -5  -1   70.69   15.10
 -13  -5   1   72.79   19.50
 -13  -5   1   39.90   10.40
 -13   5   1   62.29   11.70
  13   5  -1   61.69   25.60
 -13   5   1   40.80   10.00
  13   5  -1   69.89   12.60
 -13   5   1   49.20   15.00
 -13   5   1   45.50   12.00
  13   5  -1   62.89   13.10
  13   5  -1   45.20   10.50
  13   5  -1   47.50   10.20
  13   5  -1   74.29   18.70
 -13   5   1   73.69   13.40
  12  -5  -1   16.90    9.00
 -12  -5   1    8.30    8.10
  12  -5  -1   23.40   10.60
 -12  -5   1   12.70    8.30
  12  -5  -1   17.90    8.20
  12  -5  -1   18.10   20.60
 -12  -5   1   -5.70   11.60
  12  -5  -1   14.90   11.90
  12  -5  -1   17.90    8.50
 -12  -5   1    4.30   10.30
 -12  -5   1    7.60    5.90
  12   5  -1    4.50   18.50
 -12   5   1   14.20    7.20
  12   5  -1    5.60    4.90
 -12   5   1    0.00   12.80
 -12   5   1   11.30   13.50
 -12   5   1   10.20    6.70
  12   5  -1   30.20   19.70
  12   5  -1    8.20    7.20
  12   5  -1   15.70    8.70
  12   5  -1    4.80    6.10
 -12   5   1    9.60    7.20
  11  -5  -1  109.09   17.00
 -11  -5   1  105.89   17.90
  11  -5  -1  136.79   16.30
 -11  -5   1  153.18   22.60
 -11  -5   1  133.79   13.70
 -11  -5   1  115.79   13.00
  11  -5  -1  133.49   15.10
  11  -5  -1  178.18   32.90
  11  -5  -1  113.49   11.70
 -11  -5   1  136.79   15.60
  11  -5  -1  126.89   13.50
 -11   5   1  124.69   23.10
 -11   5   1  121.79   14.50
  11   5  -1  128.29   25.90
  11   5  -1  113.99   12.80
 -11   5   1  103.69   14.00
  11   5  -1  124.09   12.50
  11   5  -1  115.59   15.40
  11   5  -1  135.29   12.40
 -11   5   1  135.39   16.00
  11   5  -1  138.59   24.40
 -11   5   1  130.19   12.70
  10  -5  -1   11.50   13.30
  10  -5  -1    7.60    6.90
  10  -5  -1   -8.20    6.90
 -10  -5   1    7.60   12.70
 -10  -5   1   -4.10    9.50
  10  -5  -1    4.70   10.70
  10  -5  -1   11.30    8.40
  10  -5  -1    2.70    4.60
 -10  -5   1    9.30    7.60
 -10  -5   1    3.50    4.40
 -10  -5   1   10.60    7.70
 -10   5   1    8.70    5.60
 -10   5   1   -8.50   10.70
 -10   5   1   11.30    7.80
  10   5  -1    8.70   16.90
  10   5  -1   10.10    7.30
 -10   5   1   -5.10    3.50
  10   5  -1   18.20   12.10
  10   5  -1    8.00    5.90
  10   5  -1   10.60    5.90
  10   5  -1    3.10    7.30
 -10   5   1    5.10    5.20
   9  -5  -1  172.88   13.60
  -9  -5   1  179.78   14.00
   9  -5  -1  178.08   15.10
   9  -5  -1  165.38   16.30
   9  -5  -1  180.58   14.40
  -9  -5   1  189.08   19.10
  -9  -5   1  187.78   15.80
   9  -5  -1  178.88   24.50
   9  -5  -1  184.08   17.80
  -9  -5   1  188.68   12.60
  -9  -5   1  207.48   22.00
   9   5  -1  179.48   13.10
   9   5  -1  176.68   15.30
  -9   5   1  170.98   13.80
   9   5  -1  156.78   20.10
  -9   5   1  191.28   15.70
   9   5  -1  173.38   12.80
   9   5  -1  188.08   14.60
  -9   5   1  176.78   21.90
  -9   5   1  151.68   13.30
   9   5  -1  209.08   28.10
  -9   5   1  175.48   12.70
   8  -5  -1   -9.10    5.30
   8  -5  -1    0.00    8.50
   8  -5  -1   -1.50    3.60
   8  -5  -1   -1.70    5.20
  -8  -5   1    6.40    6.10
  -8  -5   1    3.30    6.20
   8  -5  -1    2.60   10.70
   8  -5  -1   -2.20    5.90
  -8  -5   1    3.20    4.00
  -8  -5   1    0.60    8.60
  -8  -5   1    1.50    7.10
   8   5  -1   -0.20   13.00
   8   5  -1   10.10    6.10
  -8   5   1  -12.60    8.50
   8   5  -1    1.20    4.30
   8   5  -1    1.20    4.50
  -8   5   1    3.90    4.00
  -8   5   1   -2.50    3.20
   8   5  -1   -1.50   12.40
   8   5  -1    0.30    4.40
  -8   5   1    3.80    7.30
  -8   5   1   -4.30    6.20
  -7  -5   1  162.58   13.20
  -7  -5   1  184.98   13.60
  -7  -5   1  199.28   19.50
  -7  -5   1  185.28   11.90
  -7  -5   1  207.28   18.30
   7  -5  -1  173.28   11.50
   7  -5  -1  188.38   13.40
   7  -5  -1  158.58   13.70
   7  -5  -1  196.08   13.00
   7  -5  -1  187.58   18.00
   7  -5  -1  165.58   13.20
  -7   5   1  160.28   16.60
   7   5  -1  158.48   11.00
  -7   5   1  177.68   13.40
   7   5  -1  181.88   13.40
  -7   5   1  187.88   11.10
   7   5  -1  162.48   18.10
  -7   5   1  175.08   12.40
   7   5  -1  167.38   19.10
  -7   5   1  154.18   12.10
   7   5  -1  167.78   12.20
   7   5  -1  185.28   13.40
   6  -5  -1    4.50    3.50
   6  -5  -1    5.10    7.00
  -6  -5   1    0.30    4.60
  -6  -5   1    8.80    5.50
  -6  -5   1    8.70   12.70
   6  -5  -1    1.90    4.90
  -6  -5   1    1.70    6.00
   6  -5  -1   11.90    5.50
   6  -5  -1    1.50    5.70
   6  -5  -1    4.90    5.30
  -6  -5   1    6.70    4.60
   6   5  -1   -0.80    3.50
   6   5  -1   10.20    8.30
  -6   5   1    3.00    4.10
  -6   5   1    8.00    4.30
   6   5  -1    2.40    3.60
   6   5  -1   12.70    4.00
  -6   5   1    0.70    5.70
   6   5  -1    9.30    4.20
  -6   5   1    8.50    3.90
   6   5  -1    1.40    9.20
  -6   5   1    7.80    4.20
   5  -5  -1  421.66   23.80
  -5  -5   1  415.16   17.20
  -5  -5   1  408.56   19.10
   5  -5  -1  414.36   20.70
   5  -5  -1  448.66   20.50
   5  -5  -1  424.66   19.10
  -5  -5   1  439.16   23.00
   5  -5  -1  413.16   19.30
   5  -5  -1  386.06   16.60
  -5  -5   1  442.36   21.30
   5   5  -1  403.26   17.50
  -5   5   1  407.26   23.30
  -5   5   1  429.06   16.30
   5   5  -1  402.26   21.50
  -5   5   1  410.16   19.00
  -5   5   1  421.76   19.60
   5   5  -1  428.46   19.30
  -5   5   1  417.76   18.60
   5   5  -1  409.06   25.80
   5   5  -1  409.06   22.50
   4  -5  -1   67.99    6.80
   4  -5  -1   85.59   10.30
  -4  -5   1   80.59    7.00
   4  -5  -1   72.69    5.70
   4  -5  -1   61.79    8.40
   4  -5  -1   72.09    7.70
  -4  -5   1   54.79   10.80
   4  -5  -1   72.69    9.40
  -4  -5   1   65.39    7.40
  -4  -5   1   66.89    8.30
  -4  -5   1   70.59    5.80
   4   5  -1   70.79    6.80
   4   5  -1   75.09   12.90
  -4   5   1   67.99    9.00
  -4   5   1   66.99    5.60
   4   5  -1   74.09    7.90
  -4   5   1   77.99    7.70
  -4   5   1   60.79    6.40
   4   5  -1   61.69    7.00
   4   5  -1   63.89   10.60
  -4   5   1   67.09    9.20
   4   5  -1   63.39    7.50
  -3  -5   1  477.45   17.50
   3  -5  -1  421.66   19.60
  -3  -5   1  427.26   17.90
  -3  -5   1  466.55   18.40
   3  -5  -1  438.86   19.60
   3  -5  -1  491.35   19.30
   3  -5  -1  465.65   21.90
  -3  -5   1  460.65   23.90
   3  -5  -1  434.56   16.00
   3  -5  -1  441.06   18.00
  -3  -5   1  443.56   18.90
  -3   5   1  480.45   18.90
  -3   5   1  438.46   18.30
   3   5  -1  414.66   18.20
  -3   5   1  459.85   15.90
   3   5  -1  429.26   19.50
   3   5  -1  470.65   25.50
  -3   5   1  466.05   18.30
   3   5  -1  452.75   17.00
   3   5  -1  460.95   18.60
  -3   5   1  448.06   22.50
  -2  -5   1  151.98    9.10
   2  -5  -1  147.59   11.40
  -2  -5   1  158.28    9.50
   2  -5  -1  178.48   10.30
  -2  -5   1  169.58    8.40
   2  -5  -1  162.78   12.00
   2  -5  -1  160.28    9.30
  -2  -5   1  160.28    9.40
  -2  -5   1  174.58    9.00
  -2  -5   1  186.68   15.70
  -2   5   1  172.78   10.30
   2   5  -1  155.18    9.40
  -2   5   1  174.98    9.20
  -2   5   1  169.38   12.20
   2   5  -1  169.98    8.40
  -2   5   1  160.08    7.00
  -2   5   1  148.39   13.20
  -2   5   1  150.88    9.20
   2   5  -1  161.08   16.90
   2   5  -1  152.98    8.70
  -1  -5   1  153.08    8.90
  -1  -5   1  164.28   13.80
  -1  -5   1  150.58    8.50
   1  -5  -1  154.98   11.90
  -1  -5   1  147.59    8.00
   1  -5  -1  148.59    8.70
  -1  -5   1  149.69    8.20
   1  -5  -1  162.48    9.30
   1  -5  -1  150.98   11.60
   1  -5  -1  147.89    8.20
  -1  -5   1  153.58    9.00
  -1   5   1  155.58    6.20
   1   5  -1  163.68    7.80
  -1   5   1  158.78    9.00
  -1   5   1  139.09   10.90
  -1   5   1  178.28    9.10
   1   5  -1  150.18    8.20
  -1   5   1  140.39   12.10
   1   5  -1  150.38    8.30
   1   5  -1  178.38   15.70
   1   5  -1  190.28   14.70
  -1   5   1  154.68    8.30
   0  -5   1  705.83   24.20
   0  -5  -1  683.63   27.20
   0  -5  -1  706.73   27.50
   0  -5   1  696.43   24.30
   0  -5   1  721.43   24.40
   0  -5  -1  717.23   24.50
   0  -5   1  682.63   25.70
   0  -5   1  710.03   26.60
   0  -5  -1  712.73   24.50
   0  -5  -1  711.33   24.50
   0  -5  -1  711.33   22.10
   0   5   1  755.32   29.70
   0   5   1  766.12   24.10
   0   5  -1  725.63   26.60
   0   5   1  662.53   26.90
   0   5  -1  716.53   24.30
   0   5  -1  676.43   24.60
   0   5  -1  685.13   25.00
   0   5   1  695.43   24.30
   0   5   1  681.23   24.10
   0   5   1  714.13   22.00
   0   5  -1  710.63   24.50
   0   5  -1  722.43   23.30
   1  -5   1  680.13   25.20
   1  -5   1  731.53   24.50
  -1  -5  -1  692.23   22.30
  -1  -5  -1  735.03   24.70
   1  -5   1  758.92   24.70
   1  -5   1  690.13   25.20
  -1  -5  -1  666.23   23.80
  -1  -5  -1  697.33   24.30
   1  -5   1  671.93   24.90
  -1  -5  -1  685.53   27.50
   1   5   1  675.13   24.30
   1   5   1  699.83   28.30
   1   5   1  710.23   23.70
  -1   5  -1  687.33   25.70
  -1   5  -1  684.83   24.20
  -1   5  -1  685.13   24.50
   1   5   1  731.83   22.40
  -1   5  -1  690.93   25.80
   1   5   1  716.23   24.60
   2  -5   1    3.60    3.90
   2  -5   1    8.60    7.00
  -2  -5  -1    4.60    3.00
  -2  -5  -1    1.60    6.50
   2  -5   1    1.60    2.60
  -2  -5  -1    2.40    2.70
  -2  -5  -1   -1.80    4.20
  -2  -5  -1    6.30    3.00
   2  -5   1    5.00    4.40
  -2  -5  -1    5.40    4.70
   2   5   1    6.40   10.00
   2   5   1    3.00    3.70
  -2   5  -1    4.50    3.30
  -2   5  -1    1.60    3.10
   2   5   1    2.10    2.90
  -2   5  -1    1.10    3.80
   2   5   1    2.70    4.20
   2   5   1    1.70    2.60
  -2   5  -1    1.80    7.40
  -2   5  -1    1.20    3.70
   3  -5   1  102.09    7.50
  -3  -5  -1   96.89   13.40
  -3  -5  -1  109.89   13.00
  -3  -5  -1  106.49    7.80
   3  -5   1  112.39    7.40
   3  -5   1   98.09    8.40
   3  -5   1  107.89    7.50
  -3  -5  -1   94.19    8.20
   3  -5   1  128.09   11.80
  -3  -5  -1  109.39    6.80
   3  -5   1  105.09   13.80
   3   5   1   93.19    6.60
   3   5   1  118.69    8.80
   3   5   1  113.39    8.00
   3   5   1   95.79   10.10
   3   5   1  123.19   17.30
  -3   5  -1  111.79    8.60
  -3   5  -1   96.69    9.80
  -3   5  -1  123.39   11.20
  -3   5  -1  103.69    7.50
   3   5   1  109.19    6.60
  -3   5  -1  109.29    8.30
  -4  -5  -1   55.59    9.70
   4  -5   1   52.59    6.00
   4  -5   1   57.89    9.60
   4  -5   1   63.29    9.40
  -4  -5  -1   57.49    7.00
  -4  -5  -1   54.39    6.50
   4  -5   1   64.29    6.60
  -4  -5  -1   58.59    5.40
   4  -5   1   44.30    6.40
  -4  -5  -1   54.39   11.10
   4  -5   1   51.59    6.50
   4  -5   1   40.90    5.70
   4   5   1   56.89   10.90
   4   5   1   43.60   12.20
   4   5   1   56.39    7.50
   4   5   1   54.39    6.60
   4   5   1   51.99    5.00
  -4   5  -1   51.19    7.00
  -4   5  -1   52.29    5.40
  -4   5  -1   51.99    8.90
   4   5   1   60.49    5.60
  -4   5  -1   66.59    7.50
   5  -5   1   12.90    5.80
  -5  -5  -1   28.40    4.70
  -5  -5  -1   37.30    8.50
  -5  -5  -1   29.10    6.70
   5  -5   1   25.50    6.60
   5  -5   1   27.70    5.20
  -5  -5  -1   28.00   12.40
  -5  -5  -1   25.90    6.20
   5  -5   1   33.80    6.60
   5  -5   1   29.90    8.60
   5  -5   1   36.10    6.70
  -5   5  -1   25.80    8.00
  -5   5  -1   28.70    6.40
  -5   5  -1   36.10    6.90
   5   5   1   21.50   11.50
   5   5   1   19.80    8.10
  -5   5  -1   30.60    5.50
   5   5   1   33.30    5.00
   5   5   1   28.80    4.00
   5   5   1   20.40    6.10
   5   5   1   34.40    6.70
   5   5   1   25.30    4.70
  -5   5  -1   23.90    7.20
  -6  -5  -1   66.29    7.80
  -6  -5  -1   76.79    9.50
  -6  -5  -1   75.99   13.90
   6  -5   1   62.89    6.90
   6  -5   1   75.79   10.70
  -6  -5  -1   63.09   12.00
  -6  -5  -1   76.19    9.50
   6  -5   1   56.19   11.80
   6  -5   1   80.49    9.50
   6  -5   1   59.09   14.00
   6   5   1   64.09   14.10
   6   5   1   78.69   15.10
   6   5   1   55.39    5.50
   6   5   1   58.39    7.70
  -6   5  -1   49.00   10.80
  -6   5  -1   65.69    8.70
   6   5   1   57.89    8.90
  -6   5  -1   87.29    9.90
  -6   5  -1   54.19    6.40
  -6   5  -1   65.49    8.30
   6   5   1   61.89    9.00
   7  -5   1   14.00    6.90
   7  -5   1    9.00    4.60
  -7  -5  -1   17.30    6.70
   7  -5   1   11.10    9.10
   7  -5   1   11.80    5.00
   7  -5   1    4.70    8.30
  -7  -5  -1    6.50    8.30
  -7  -5  -1   11.60    7.40
  -7  -5  -1   16.50    7.20
  -7  -5  -1    9.60    5.40
   7  -5   1   14.60    5.70
   7   5   1   16.20    5.80
   7   5   1    9.70    3.80
   7   5   1   18.80    4.90
  -7   5  -1   12.80    5.60
   7   5   1    7.90    9.30
   7   5   1   14.70   12.60
  -7   5  -1   13.70    7.10
  -7   5  -1    6.90   10.40
   7   5   1   19.00    7.00
  -7   5  -1   19.90    6.80
  -7   5  -1    6.00    4.90
   8  -5   1  135.69   21.60
   8  -5   1  142.99   15.50
  -8  -5  -1  123.59   12.80
  -8  -5  -1  116.89   10.90
   8  -5   1  110.99   11.50
   8  -5   1  142.19   15.30
  -8  -5  -1  130.89   16.80
  -8  -5  -1  123.79   15.80
   8  -5   1  131.59   11.70
   8  -5   1  137.49   10.90
  -8  -5  -1  130.69   11.40
  -8   5  -1  135.49   12.90
   8   5   1  129.69   12.90
   8   5   1  131.59   12.10
   8   5   1  113.39   20.90
  -8   5  -1  129.69   13.40
   8   5   1  128.59   18.50
  -8   5  -1  120.99   11.30
   8   5   1  127.39    9.00
  -8   5  -1  125.69   18.90
  -8   5  -1  118.49   10.80
   8   5   1  112.29   11.00
  -9  -5  -1   12.90    8.50
   9  -5   1   10.40    7.40
  -9  -5  -1    7.00   12.00
  -9  -5  -1   13.10    7.90
  -9  -5  -1   12.90   13.80
   9  -5   1   12.90   10.60
  -9  -5  -1   23.50    7.40
   9  -5   1   10.60   16.30
   9  -5   1   12.00    5.30
   9  -5   1   12.00    6.90
   9  -5   1    9.70    6.60
  -9   5  -1   10.60    7.60
  -9   5  -1   10.40    6.00
   9   5   1    1.80   16.00
   9   5   1    9.00    5.50
   9   5   1   12.10    5.80
  -9   5  -1   12.60   10.00
   9   5   1   15.70    6.30
  -9   5  -1   15.70    7.40
   9   5   1   12.50    5.60
  -9   5  -1   17.30    6.90
   9   5   1   14.00   12.20
  10  -5   1   55.59   10.80
 -10  -5  -1   72.29   11.80
  10  -5   1   58.99   10.50
 -10  -5  -1   38.90    8.30
  10  -5   1   59.59   13.00
  10  -5   1   47.70   21.30
 -10  -5  -1   51.49   12.50
  10  -5   1   65.79   10.50
 -10  -5  -1   45.10    8.30
 -10  -5  -1   56.99   17.90
  10  -5   1   48.00   10.10
 -10   5  -1   53.39   10.10
  10   5   1   62.29   10.30
  10   5   1   53.09   15.30
  10   5   1   68.39   22.00
 -10   5  -1   74.39   12.50
  10   5   1   60.39    9.70
 -10   5  -1   71.99   11.40
 -10   5  -1   52.19   17.40
  10   5   1   56.59    9.40
  10   5   1   56.89    8.40
 -10   5  -1   63.39    8.80
  11  -5   1   50.79   11.20
  11  -5   1   32.10    9.30
 -11  -5  -1   66.69   11.80
 -11  -5  -1   64.79   15.70
  11  -5   1   82.09   25.00
 -11  -5  -1   62.79   16.30
 -11  -5  -1   66.59    9.90
  11  -5   1   56.79   11.00
 -11  -5  -1   69.79   12.70
  11  -5   1   62.99   11.90
  11  -5   1   64.19   11.50
  11   5   1   51.59   20.10
  11   5   1   90.69   24.50
 -11   5  -1   65.99   12.10
  11   5   1   74.89   10.80
  11   5   1   68.99   13.10
 -11   5  -1   54.69   18.20
  11   5   1   51.29    8.10
  11   5   1   32.50    8.00
 -11   5  -1   66.69   11.80
 -11   5  -1   70.39   12.40
 -11   5  -1   58.99   10.60
  12  -5   1    4.70    5.20
 -12  -5  -1    3.30    7.20
 -12  -5  -1   15.40   13.40
 -12  -5  -1   15.20    9.00
 -12  -5  -1   12.00   11.00
  12  -5   1   -1.80   11.10
 -12  -5  -1    4.60    6.60
  12  -5   1    4.10    8.00
  12  -5   1   20.50   15.30
  12  -5   1    9.60    8.20
  12   5   1    5.10    9.10
 -12   5  -1   16.80    6.90
  12   5   1    1.60   19.50
 -12   5  -1    6.70   11.10
  12   5   1    0.90    5.90
  12   5   1    9.70    6.90
  12   5   1    9.40    6.00
 -12   5  -1    5.40    5.90
 -12   5  -1   -8.70    4.60
  12   5   1    1.30   12.60
 -12   5  -1   16.10    8.60
  13  -5   1   22.60   10.70
 -13  -5  -1   31.00   11.70
  13  -5   1    4.70    4.80
  13  -5   1   16.60   11.40
 -13  -5  -1    4.40    5.20
  13  -5   1   12.00    8.50
 -13  -5  -1   30.10   10.70
  13  -5   1    1.10   14.90
 -13  -5  -1   33.80   10.40
 -13   5  -1   16.50    9.40
 -13   5  -1   21.10   10.70
 -13   5  -1   36.90   16.50
  13   5   1   14.30    7.10
  13   5   1   37.10   11.40
  13   5   1   29.90   20.20
  13   5   1   17.10    6.90
  13   5   1   22.60   18.20
 -13   5  -1   12.80    6.40
  13   5   1    7.90    9.90
 -13   5  -1    4.50    9.80
  14  -5   1    6.90   12.10
  14  -5   1   -7.40    8.50
 -14  -5  -1    4.00    7.00
 -14  -5  -1   12.10   16.60
 -14  -5  -1   15.40    9.10
 -14  -5  -1   45.70   15.30
 -14  -5  -1   -1.70    5.90
  14  -5   1  -16.20   17.20
  14  -5   1   14.30   10.70
  14  -5   1    0.50    7.30
  14   5   1  -13.20   22.20
  14   5   1   10.60   19.40
 -14   5  -1    4.00    8.40
 -14   5  -1   14.50    7.30
  14   5   1   12.40    9.40
 -14   5  -1   16.00   14.70
  14   5   1   -5.70    6.50
  14   5   1   23.80   10.70
 -14   5  -1   18.50    8.00
 -14   5  -1   25.10    9.70
  15  -5   1   -1.00    7.80
  15  -5   1   11.00   11.90
 -15  -5  -1   -0.20    9.50
 -15  -5  -1   -4.10   18.10
 -15  -5  -1    2.40   10.50
  15  -5   1    6.90    7.40
  15  -5   1   -8.50   20.70
  15  -5   1    0.60    8.90
  15   5   1    4.50    7.40
  15   5   1  -21.60   23.90
 -15   5  -1    1.50    6.40
  15   5   1   -7.10    9.50
 -15   5  -1    1.40    7.10
  15   5   1   -5.10    6.70
  15   5   1   -3.20    7.50
  15   5   1    0.10   15.70
 -15   5  -1   -9.40    9.50
 -15   5  -1    7.70    9.60
 -15   5  -1   -4.40   11.10
  16  -6  -1    3.00   12.80
  16  -6  -1   23.30   10.70
  16  -6  -1   25.70   23.40
  16  -6  -1    7.50    7.90
 -16  -6   1  -11.60    8.30
 -16  -6   1   10.90    7.60
  16  -6  -1   31.10   13.00
 -16  -6   1   18.80   16.10
 -16   6   1   49.99   17.10
  16   6  -1   14.20   26.50
  16   6  -1   18.70    8.90
 -16   6   1   13.90   10.40
  16   6  -1    4.50    8.50
 -16   6   1    4.70   11.40
  16   6  -1   26.40   26.00
 -16   6   1   10.00    7.70
  16   6  -1    3.10   10.20
 -16   6   1    0.20    8.30
 -15  -6   1    2.40   14.90
 -15  -6   1   -0.60    6.30
  15  -6  -1   -3.30    6.90
  15  -6  -1    7.90    8.60
 -15  -6   1    2.30    7.20
 -15  -6   1    7.90    9.40
  15  -6  -1  -12.80   25.60
  15  -6  -1   -6.20    9.50
  15   6  -1    7.80   17.40
 -15   6   1   16.90   10.60
 -15   6   1    7.50    8.00
  15   6  -1   17.70   10.20
  15   6  -1    0.00    7.70
 -15   6   1   10.00   10.50
  15   6  -1   -0.20    7.20
  15   6  -1   -8.70   21.80
 -15   6   1    8.40    7.90
 -15   6   1   -1.60    6.40
  15   6  -1    5.90    9.30
  14  -6  -1   32.70   26.80
 -14  -6   1   38.30   17.70
  14  -6  -1   34.80   11.20
 -14  -6   1   61.09   23.60
 -14  -6   1   35.40    8.90
 -14  -6   1   40.50   14.00
 -14  -6   1   26.00   10.80
  14  -6  -1   61.79   14.60
  14  -6  -1   35.20   11.70
 -14   6   1   41.20    9.00
 -14   6   1   47.80   12.60
 -14   6   1   72.69   20.70
 -14   6   1   95.69   17.30
  14   6  -1   43.40   10.50
  14   6  -1   42.60   24.30
  14   6  -1   71.79   24.40
  14   6  -1   36.90    9.00
  14   6  -1   37.40   11.50
 -14   6   1   24.50   10.40
  13  -6  -1    7.00   12.50
  13  -6  -1   -0.10    4.00
 -13  -6   1   37.10   10.50
 -13  -6   1    1.80    7.90
 -13  -6   1   17.00   15.40
 -13  -6   1    4.10   14.00
 -13  -6   1    3.80    9.60
  13  -6  -1   19.20    9.00
  13  -6  -1    4.90    8.50
  13  -6  -1  -17.10   20.20
  13   6  -1    8.50   15.50
 -13   6   1    5.00    5.40
  13   6  -1    8.60    6.80
  13   6  -1    3.90    6.60
  13   6  -1   22.50   16.60
 -13   6   1    8.90    7.90
 -13   6   1   13.90   11.40
 -13   6   1   13.90    8.90
 -13   6   1    8.00    9.50
  13   6  -1    8.60    6.10
  13   6  -1    0.10    6.90
 -12  -6   1  105.19   20.00
  12  -6  -1   93.39   14.80
 -12  -6   1  108.49   21.10
  12  -6  -1   75.09   12.20
 -12  -6   1   64.59   10.20
 -12  -6   1   97.79   13.60
  12  -6  -1   94.99   22.00
  12  -6  -1   83.29   13.90
  12  -6  -1   91.09   12.00
  12  -6  -1   95.59   15.20
 -12  -6   1   78.59   13.60
 -12   6   1   85.79   19.70
  12   6  -1  116.39   40.70
  12   6  -1   95.19   13.50
  12   6  -1  103.79   14.90
 -12   6   1  110.39   15.40
  12   6  -1   94.19   11.30
 -12   6   1  130.49   15.90
  12   6  -1  118.29   33.70
 -12   6   1  100.19   18.30
  12   6  -1   53.29    9.40
  11  -6  -1    7.90   18.90
 -11  -6   1    8.40    5.30
 -11  -6   1    5.30    9.60
  11  -6  -1   -9.70    6.50
  11  -6  -1   18.50   12.40
  11  -6  -1    6.50    8.40
 -11  -6   1    8.30    8.60
  11  -6  -1   -0.10    7.10
 -11  -6   1    9.70    8.30
 -11  -6   1   -4.20   11.20
  11  -6  -1    2.40    5.40
 -11   6   1   -3.50    5.40
  11   6  -1   10.80    6.30
  11   6  -1    3.20    5.70
  11   6  -1    2.60    5.50
 -11   6   1   -1.60    5.30
  11   6  -1   -0.20   17.10
 -11   6   1    9.10    8.20
 -11   6   1    6.80   12.80
  11   6  -1   -4.00   19.10
  11   6  -1    2.40    5.90
 -11   6   1   -1.40    6.70
 -10  -6   1   38.10   14.30
  10  -6  -1   23.40    7.90
 -10  -6   1   32.30   12.70
  10  -6  -1   24.30    7.10
 -10  -6   1   38.80    9.30
  10  -6  -1   25.80    9.30
 -10  -6   1   20.20    5.90
  10  -6  -1   12.60    8.40
  10  -6  -1   33.70    9.30
  10  -6  -1   22.30   13.20
 -10  -6   1   24.90    9.00
  10   6  -1   21.10    6.60
 -10   6   1   25.80    7.60
 -10   6   1   11.80    9.20
  10   6  -1   13.30   18.30
  10   6  -1   13.20    6.20
 -10   6   1   11.80   13.00
  10   6  -1   22.70    8.40
  10   6  -1   25.30   13.00
 -10   6   1   30.50    8.00
  10   6  -1   22.70    9.10
 -10   6   1   19.20    5.90
  -9  -6   1  179.98   15.90
   9  -6  -1  200.78   15.20
  -9  -6   1  183.88   23.00
  -9  -6   1  208.28   22.30
   9  -6  -1  190.18   13.10
   9  -6  -1  190.78   26.00
  -9  -6   1  189.08   14.50
   9  -6  -1  193.48   14.60
  -9  -6   1  178.78   12.70
   9  -6  -1  216.08   18.70
   9  -6  -1  168.98   16.40
   9   6  -1  184.28   24.10
   9   6  -1  188.88   13.50
  -9   6   1  156.48   15.30
  -9   6   1  174.98   14.60
  -9   6   1  200.28   13.50
  -9   6   1  213.58   16.20
  -9   6   1  181.98   22.90
   9   6  -1  163.78   15.10
   9   6  -1  183.08   24.90
   9   6  -1  169.78   12.90
   9   6  -1  180.98   16.00
   8  -6  -1  312.97   21.10
   8  -6  -1  301.47   16.40
  -8  -6   1  316.17   23.30
   8  -6  -1  339.97   23.40
   8  -6  -1  280.97   18.70
   8  -6  -1  306.47   24.20
  -8  -6   1  278.97   17.10
  -8  -6   1  311.97   16.70
  -8  -6   1  310.47   23.90
  -8  -6   1  295.67   18.60
   8  -6  -1  284.17   17.40
   8   6  -1  321.77   17.50
  -8   6   1  283.87   17.80
   8   6  -1  298.37   29.30
   8   6  -1  290.37   25.70
  -8   6   1  284.57   17.50
   8   6  -1  318.27   18.90
  -8   6   1  302.37   17.60
  -8   6   1  298.17   23.90
   8   6  -1  280.87   15.90
   8   6  -1  287.97   23.30
  -8   6   1  301.07   15.60
  -7  -6   1   23.30   10.60
   7  -6  -1   15.40    6.40
   7  -6  -1   19.70    9.30
  -7  -6   1    8.10    8.00
   7  -6  -1   15.10    9.10
   7  -6  -1    9.50    7.00
  -7  -6   1   15.70    5.60
  -7  -6   1   15.30    7.70
   7  -6  -1   17.60    7.20
   7  -6  -1   18.90    4.50
  -7  -6   1    7.30    4.10
  -7   6   1   15.50    5.50
   7   6  -1   21.80    6.90
   7   6  -1   18.10    6.30
   7   6  -1   13.00    6.90
  -7   6   1   13.80    3.90
   7   6  -1   25.00   14.00
   7   6  -1    8.90    4.60
  -7   6   1   19.60    7.80
  -7   6   1   20.70    6.70
   7   6  -1   21.60   11.90
  -7   6   1   17.60   10.90
  -6  -6   1  111.79    8.50
  -6  -6   1  113.39   10.70
  -6  -6   1  118.99   21.30
   6  -6  -1  109.89   11.50
   6  -6  -1  126.59   11.30
   6  -6  -1  108.49   13.10
  -6  -6   1  108.59   17.20
   6  -6  -1   99.49    9.60
   6  -6  -1  115.29   13.80
   6  -6  -1  102.69   10.80
  -6  -6   1  108.69   11.00
  -6   6   1  143.99   11.40
   6   6  -1  109.89    8.30
   6   6  -1  115.59    8.80
  -6   6   1  108.39   15.50
   6   6  -1  101.09    9.50
   6   6  -1  122.29   10.00
  -6   6   1  106.29   11.60
   6   6  -1   97.59   14.40
  -6   6   1  121.79    8.40
   6   6  -1  112.49   16.20
   6   6  -1  112.59   11.10
  -6   6   1  113.59   15.30
   5  -6  -1  239.28   16.90
   5  -6  -1  269.17   14.80
  -5  -6   1  232.88   12.00
   5  -6  -1  230.58   16.30
  -5  -6   1  249.48   14.60
  -5  -6   1  241.48   15.50
   5  -6  -1  256.27   19.20
   5  -6  -1  221.18   14.50
   5  -6  -1  237.38   11.90
  -5  -6   1  230.68   14.20
  -5  -6   1  248.28   20.10
   5   6  -1  257.77   16.00
   5   6  -1  259.97   13.10
  -5   6   1  224.38   14.90
   5   6  -1  231.48   22.90
  -5   6   1  255.67   14.50
   5   6  -1  240.08   17.50
  -5   6   1  233.08   17.90
   5   6  -1  225.98   13.80
   5   6  -1  239.28   14.30
  -5   6   1  248.68   13.60
  -5   6   1  237.78   11.50
   4  -6  -1  531.45   21.80
  -4  -6   1  560.94   27.70
   4  -6  -1  533.25   19.40
  -4  -6   1  544.35   22.10
  -4  -6   1  557.44   24.20
  -4  -6   1  518.25   20.20
   4  -6  -1  564.64   26.50
  -4  -6   1  521.95   22.00
   4  -6  -1  564.94   24.00
   4  -6  -1  536.35   22.00
   4  -6  -1  521.25   22.30
   4   6  -1  562.34   22.50
  -4   6   1  509.55   30.70
   4   6  -1  526.55   22.30
   4   6  -1  518.95   29.20
  -4   6   1  511.95   27.10
  -4   6   1  543.45   22.20
   4   6  -1  521.25   22.30
  -4   6   1  525.45   19.10
   4   6  -1  500.15   23.90
  -4   6   1  531.25   22.30
  -3  -6   1  531.05   22.60
   3  -6  -1  589.34   23.40
   3  -6  -1  536.25   19.10
   3  -6  -1  573.74   25.80
  -3  -6   1  560.54   20.60
  -3  -6   1  569.34   22.10
  -3  -6   1  537.95   21.90
  -3  -6   1  564.14   26.00
   3  -6  -1  604.94   23.10
  -3  -6   1  548.95   21.80
   3  -6  -1  544.05   21.70
   3  -6  -1  542.25   23.30
   3   6  -1  519.75   21.30
  -3   6   1  553.04   19.50
  -3   6   1  598.14   23.40
   3   6  -1  555.44   22.20
  -3   6   1  538.85   26.20
  -3   6   1  524.35   21.50
   3   6  -1  544.45   26.70
   3   6  -1  578.44   20.30
  -3   6   1  506.15   21.20
   3   6  -1  532.75   22.80
   3   6  -1  585.94   22.30
  -2  -6   1  116.89    8.80
   2  -6  -1  116.19    8.50
  -2  -6   1  121.89    7.90
   2  -6  -1  124.59   11.80
  -2  -6   1  101.59    8.40
  -2  -6   1  131.49    8.90
  -2  -6   1  113.59   12.70
  -2  -6   1  116.89    9.10
   2  -6  -1  128.39    9.50
   2  -6  -1  111.09   13.20
   2  -6  -1  117.09   11.50
  -2   6   1  120.39   11.20
   2   6  -1  120.29    7.30
  -2   6   1  109.19    5.80
  -2   6   1  109.09    7.80
  -2   6   1  102.29    9.10
   2   6  -1  108.69    8.40
  -2   6   1  118.09   10.50
   2   6  -1  112.29    9.90
   2   6  -1  110.69   13.70
  -2   6   1  121.39    8.00
   2   6  -1  121.09   10.90
  -1  -6   1    3.40    3.00
  -1  -6   1    2.10    3.90
  -1  -6   1    8.70    6.10
   1  -6  -1    4.90    2.90
   1  -6  -1    0.90    6.80
  -1  -6   1    6.60    5.50
  -1  -6   1    3.30    2.90
   1  -6  -1    4.10    4.60
   1  -6  -1    3.30    2.70
   1  -6  -1    4.50    4.70
   1   6  -1    3.70    3.00
  -1   6   1    3.80    4.00
  -1   6   1    1.00    4.20
   1   6  -1    6.80    4.70
  -1   6   1    8.30    4.60
   1   6  -1   -2.10    8.70
  -1   6   1    4.30    3.90
  -1   6   1    2.00    1.70
   1   6  -1    1.00    2.90
  -1   6   1    0.30    5.20
   0  -6   1  187.48   12.90
   0  -6  -1  193.28   17.10
   0  -6   1  189.08   12.80
   0  -6  -1  185.08    9.90
   0  -6   1  209.18   10.70
   0  -6  -1  196.08   10.70
   0  -6   1  197.58    9.90
   0  -6   1  184.28   10.10
   0  -6  -1  191.78   10.50
   0  -6  -1  180.48    7.70
   0  -6  -1  210.68   16.20
   0   6   1  192.88   13.80
   0   6  -1  184.48    8.60
   0   6   1  174.38   11.80
   0   6  -1  205.68   14.50
   0   6   1  179.58   10.40
   0   6   1  205.08   10.40
   0   6  -1  185.48   10.50
   0   6  -1  189.48   10.30
   0   6   1  188.78    9.90
   0   6  -1  217.98   13.30
   0   6   1  188.18    7.80
  -1  -6  -1   44.30    8.60
   1  -6   1   41.90    6.20
   1  -6   1   37.30    5.50
   1  -6   1   30.20    5.30
  -1  -6  -1   41.70   10.40
   1  -6   1   36.90    6.60
  -1  -6  -1   40.80    5.70
  -1  -6  -1   37.80    5.20
   1  -6   1   34.60    5.90
  -1  -6  -1   37.20    3.90
  -1   6  -1   40.40    6.60
   1   6   1   44.50    6.10
  -1   6  -1   40.70    5.80
   1   6   1   47.20   10.40
  -1   6  -1   44.80    7.20
   1   6   1   42.40    4.00
  -1   6  -1   46.10    6.80
   1   6   1   39.80    7.70
  -1   6  -1   30.00    6.60
   1   6   1   44.50    6.10
   2  -6   1  952.30   33.10
   2  -6   1  992.90   34.70
  -2  -6  -1  967.50   33.40
  -2  -6  -1  980.20   31.30
  -2  -6  -1  919.11   32.10
  -2  -6  -1  963.10   39.30
  -2  -6  -1  982.70   34.00
   2  -6   1  988.80   35.80
   2  -6   1  991.60   33.50
   2  -6   1  968.10   33.20
  -2  -6  -1  969.80   36.60
   2   6   1  993.40   39.00
   2   6   1 1024.00   31.40
  -2   6  -1  966.60   32.10
  -2   6  -1  985.70   33.50
  -2   6  -1  960.80   33.60
  -2   6  -1  972.40   36.50
   2   6   1  974.20   33.50
  -2   6  -1  964.70   33.50
   2   6   1  994.10   33.60
   2   6   1  925.21   31.90
  -2   6  -1 1079.79   34.90
  -3  -6  -1   12.60    8.00
  -3  -6  -1    7.80    2.80
   3  -6   1    8.40    2.90
  -3  -6  -1    8.90    3.90
   3  -6   1   14.30    4.10
   3  -6   1   10.00    5.40
  -3  -6  -1   11.40    4.00
  -3  -6  -1   11.50    7.60
   3  -6   1   17.20    4.50
   3  -6   1    7.30    5.90
  -3  -6  -1    8.20    4.70
   3  -6   1   11.20    3.70
  -3   6  -1   11.50    4.40
  -3   6  -1   14.00    5.50
   3   6   1   13.40    5.30
   3   6   1   18.30    4.10
   3   6   1   11.50    7.70
  -3   6  -1    3.30    6.40
  -3   6  -1   14.60    5.00
  -3   6  -1   15.90    5.20
   3   6   1   15.20    5.00
   3   6   1   14.00    4.10
  -4  -6  -1   14.40    3.50
   4  -6   1   13.50    4.30
  -4  -6  -1   12.80    7.50
  -4  -6  -1   21.60    5.60
   4  -6   1   13.50    5.80
   4  -6   1   10.50    5.00
  -4  -6  -1   12.70    8.60
   4  -6   1    9.20    4.00
  -4  -6  -1   16.60    5.40
   4  -6   1   13.30    3.90
   4  -6   1   13.30    8.20
   4   6   1    6.40    7.90
   4   6   1   15.30    6.60
  -4   6  -1   13.10    4.30
  -4   6  -1   13.50    7.70
  -4   6  -1   13.50    5.50
   4   6   1   19.20    5.90
   4   6   1   14.70    3.70
   4   6   1   23.50    7.30
  -4   6  -1   16.00    3.50
   4   6   1   19.50    5.60
  -4   6  -1   16.60    4.40
   5  -6   1  407.96   24.30
   5  -6   1  437.96   19.90
   5  -6   1  445.16   20.00
   5  -6   1  462.65   22.00
  -5  -6  -1  450.65   24.60
   5  -6   1  426.36   20.20
  -5  -6  -1  458.85   20.40
  -5  -6  -1  436.46   18.40
  -5  -6  -1  443.86   20.60
   5  -6   1  459.95   25.70
   5  -6   1  421.76   18.40
   5   6   1  422.26   18.40
  -5   6  -1  440.36   25.70
  -5   6  -1  412.36   20.00
  -5   6  -1  412.96   19.50
  -5   6  -1  453.75   20.50
  -5   6  -1  433.26   18.10
   5   6   1  416.86   24.10
   5   6   1  434.56   25.30
   5   6   1  466.35   20.30
  -6  -6  -1   17.60    5.50
  -6  -6  -1   11.10    8.10
   6  -6   1   21.80    8.40
   6  -6   1   22.80    6.50
  -6  -6  -1   29.80   11.20
  -6  -6  -1   18.40    6.10
   6  -6   1   17.30   11.40
   6  -6   1   22.90    9.20
   6  -6   1   14.60    5.00
  -6  -6  -1    8.90    6.30
   6  -6   1   25.40    7.00
   6   6   1   33.60    6.60
   6   6   1   31.00    6.50
   6   6   1   28.40   12.00
   6   6   1   21.90    9.10
  -6   6  -1   25.30    6.80
   6   6   1   12.00    4.20
  -6   6  -1   16.40    6.10
   6   6   1   15.30    4.20
  -6   6  -1   16.00    7.80
  -6   6  -1    7.50    9.40
   6   6   1   17.70    9.40
  -6   6  -1   22.60    5.70
   7  -6   1  383.46   18.10
  -7  -6  -1  407.76   27.30
  -7  -6  -1  392.06   27.00
   7  -6   1  344.27   18.60
  -7  -6  -1  367.46   20.20
   7  -6   1  358.46   25.40
   7  -6   1  356.66   19.40
  -7  -6  -1  348.97   19.00
   7  -6   1  333.67   19.00
  -7  -6  -1  351.36   17.20
   7  -6   1  411.06   20.70
   7   6   1  360.66   15.80
  -7   6  -1  348.37   17.10
  -7   6  -1  368.36   19.40
   7   6   1  378.36   17.90
   7   6   1  381.36   19.80
  -7   6  -1  379.36   19.40
  -7   6  -1  374.26   19.50
   7   6   1  348.77   27.20
  -7   6  -1  381.86   27.00
   7   6   1  341.87   29.50
   8  -6   1   28.00    6.50
  -8  -6  -1   46.00    9.20
  -8  -6  -1   41.60    9.40
   8  -6   1   39.50    7.60
   8  -6   1   54.89    9.70
   8  -6   1   38.50   16.60
  -8  -6  -1   40.20   12.00
   8  -6   1   27.70    7.50
  -8  -6  -1   26.80    9.60
  -8  -6  -1   36.10    6.60
   8  -6   1   57.89    9.90
  -8   6  -1   42.00    9.20
   8   6   1   32.30   13.20
  -8   6  -1   25.90   13.00
   8   6   1   32.40    8.10
   8   6   1   43.30    9.30
  -8   6  -1   38.70    9.40
   8   6   1   46.30    6.00
  -8   6  -1   38.30    8.90
   8   6   1   27.60   16.10
   8   6   1   33.70    7.00
  -8   6  -1   33.40    6.50
   9  -6   1  135.89   17.40
   9  -6   1  131.79   12.60
  -9  -6  -1  158.18   22.40
  -9  -6  -1  125.19   14.50
  -9  -6  -1  124.39   13.60
   9  -6   1  139.09   14.30
  -9  -6  -1  109.09   17.50
   9  -6   1  163.48   24.80
   9  -6   1  111.89   12.30
  -9  -6  -1  114.99   10.80
   9  -6   1  131.19   13.30
   9   6   1  126.39   13.70
   9   6   1  117.89   18.50
  -9   6  -1  134.09   14.30
  -9   6  -1  111.49   20.20
   9   6   1  134.49   11.50
   9   6   1  117.19   10.80
  -9   6  -1  145.79   14.00
  -9   6  -1  140.89   23.70
   9   6   1  124.49   13.50
  -9   6  -1  118.09   10.60
   9   6   1  125.49   22.90
 -10  -6  -1    3.90   14.50
 -10  -6  -1    0.90    7.10
  10  -6   1    1.80    6.50
  10  -6   1   -8.60   10.90
  10  -6   1   -1.50    5.50
  10  -6   1    8.00    7.00
 -10  -6  -1    6.60    7.50
  10  -6   1   10.20   13.10
  10  -6   1    1.30    4.80
 -10  -6  -1    4.20    4.80
 -10  -6  -1   12.20   12.00
 -10   6  -1  -11.70   11.50
  10   6   1   -6.00    4.80
  10   6   1  -10.10    6.60
 -10   6  -1   -6.10    6.80
 -10   6  -1    5.60    7.60
  10   6   1    3.60    5.70
 -10   6  -1   -0.30    4.50
  10   6   1   -5.50    4.70
  10   6   1   16.60   18.20
  10   6   1   -0.20   11.50
 -10   6  -1   -6.90    7.10
  11  -6   1   28.70   10.40
  11  -6   1   13.00   15.50
  11  -6   1   18.20    8.00
  11  -6   1    6.50    6.40
 -11  -6  -1   17.50   13.00
 -11  -6  -1   23.40    8.00
 -11  -6  -1   25.90    9.30
  11  -6   1   21.00    8.50
 -11  -6  -1   19.60    7.60
  11  -6   1   22.10   10.50
 -11  -6  -1   28.90   13.30
  11   6   1   15.90   15.30
 -11   6  -1   18.90    7.70
 -11   6  -1   11.40    6.70
  11   6   1   30.20    8.90
  11   6   1   42.70   20.10
  11   6   1   13.80    6.80
 -11   6  -1   16.70    6.90
 -11   6  -1   19.20   13.00
 -11   6  -1   37.50    9.50
  11   6   1   28.60    6.80
  11   6   1   15.50    9.00
  12  -6   1   45.80   10.70
 -12  -6  -1   43.60   10.50
  12  -6   1   42.70   14.00
  12  -6   1   49.70   19.40
 -12  -6  -1   37.30    8.50
 -12  -6  -1   38.90   15.10
 -12  -6  -1   34.00    8.30
  12  -6   1   37.20    9.90
  12  -6   1   43.90   10.90
 -12  -6  -1   41.40   18.40
  12   6   1   46.40   20.10
  12   6   1   61.99   12.80
 -12   6  -1   40.10   11.30
 -12   6  -1   45.80   10.80
  12   6   1   32.70    9.30
  12   6   1   27.80   17.40
 -12   6  -1   39.40   25.80
  12   6   1   40.40    8.60
 -12   6  -1   52.99   11.00
 -12   6  -1   24.10    7.80
  12   6   1   42.20   17.90
 -13  -6  -1   19.60   11.90
 -13  -6  -1   11.30    7.10
  13  -6   1   23.70   10.30
 -13  -6  -1   16.60    7.10
  13  -6   1   16.70   15.50
  13  -6   1   15.30    8.60
  13  -6   1    6.10    5.20
 -13  -6  -1   27.80   11.40
  13  -6   1   33.70   18.90
  13   6   1   46.00   10.70
  13   6   1   37.60   11.60
  13   6   1   25.90    8.90
 -13   6  -1   22.40    9.90
 -13   6  -1   43.10   12.30
  13   6   1   13.90   20.10
 -13   6  -1   51.89   17.80
  13   6   1   25.90   17.50
  13   6   1   19.10    7.00
 -13   6  -1   21.60    9.30
 -13   6  -1   29.00   11.20
  14  -6   1    7.60    9.20
 -14  -6  -1   15.60   10.20
  14  -6   1   -2.60    8.70
 -14  -6  -1   -2.70    8.70
 -14  -6  -1   -0.50   10.20
  14  -6   1   11.30   13.80
  14  -6   1    2.70   18.80
 -14  -6  -1   -3.80    8.70
  14  -6   1    4.30   11.00
 -14  -6  -1   40.40   15.50
 -14   6  -1    5.30    7.90
 -14   6  -1   -5.30    8.20
  14   6   1    1.10    9.00
 -14   6  -1    9.20    9.30
  14   6   1   -8.10    5.60
  14   6   1   -0.50   14.50
 -14   6  -1   24.40   15.00
  14   6   1   -1.50   24.30
 -14   6  -1   -3.50    9.00
  14   6   1   -2.50    6.10
  15  -6   1    4.20   12.80
 -15  -6  -1   15.50    8.60
 -15  -6  -1   14.20   17.60
  15  -6   1   10.00   12.30
  15  -6   1   16.00   10.60
  15  -6   1   15.10    8.20
 -15  -6  -1   37.20   17.90
  15  -6   1    3.00   27.20
 -15   6  -1   22.80   10.80
  15   6   1   26.70   20.60
 -15   6  -1   25.10   10.70
  15   6   1    7.40   10.40
  15   6   1    7.50    7.40
  15   6   1   26.30   11.80
  15   6   1   32.50    9.20
 -15   6  -1    6.20    7.30
 -15   6  -1   15.80   12.70
  15   6   1   32.50   23.80
 -15   6  -1   16.40    8.30
 -15  -7   1   34.10    9.80
 -15  -7   1   56.79   13.60
  15  -7  -1   35.10   15.20
  15  -7  -1   31.70   14.70
 -15  -7   1   34.70   11.60
  15  -7  -1   41.30   23.90
 -15  -7   1   24.70   17.40
  15  -7  -1   51.79   13.60
 -15   7   1   74.39   18.90
  15   7  -1   59.39   28.10
  15   7  -1   56.29   22.10
  15   7  -1   36.30   12.40
  15   7  -1   44.90   11.70
 -15   7   1   36.00   10.40
 -15   7   1   43.00   10.90
  15   7  -1   35.00    9.30
 -15   7   1   50.79   14.30
  15   7  -1   39.70   10.90
 -14  -7   1   21.20   10.40
 -14  -7   1    3.10    6.10
 -14  -7   1   -5.00    8.40
  14  -7  -1    0.20   17.60
  14  -7  -1   -6.40    5.30
  14  -7  -1    2.10    9.70
  14  -7  -1   12.10    9.50
 -14  -7   1   -9.40    9.30
  14  -7  -1    4.10   11.30
 -14  -7   1   13.60   10.80
 -14   7   1    4.90    9.90
 -14   7   1    2.90    8.40
  14   7  -1    3.20    7.00
  14   7  -1    4.30   10.30
  14   7  -1   -1.40   22.60
 -14   7   1   15.40   10.10
  14   7  -1    7.80   22.50
 -14   7   1   -0.30   12.50
  14   7  -1    8.50    9.10
 -14   7   1    3.70   10.20
 -13  -7   1  167.38   26.30
  13  -7  -1  100.39   28.90
 -13  -7   1   90.59   13.30
  13  -7  -1   56.79   10.80
  13  -7  -1   85.69   14.80
  13  -7  -1  108.99   18.00
  13  -7  -1   84.59   12.30
 -13  -7   1   93.29   15.00
 -13  -7   1   77.19   12.90
 -13  -7   1  103.99   19.80
 -13   7   1   78.29   13.50
  13   7  -1   78.89   25.80
 -13   7   1   80.89   14.60
  13   7  -1   76.89   12.20
  13   7  -1   89.29   12.00
 -13   7   1  101.29   14.70
  13   7  -1   90.79   14.20
  13   7  -1  109.49   22.40
 -13   7   1   89.89   11.30
 -13   7   1  119.59   22.70
 -12  -7   1   -3.50    7.70
 -12  -7   1   19.10   10.20
  12  -7  -1   -6.60   19.70
 -12  -7   1   -4.60    8.20
  12  -7  -1   -1.20    8.30
  12  -7  -1    3.40    7.40
 -12  -7   1    4.70    7.10
  12  -7  -1    9.10    8.30
  12  -7  -1    4.00    8.80
 -12  -7   1   13.00   14.40
  12  -7  -1   10.50    6.30
  12   7  -1    3.40    8.60
  12   7  -1   -8.10   14.50
  12   7  -1   17.70    9.50
  12   7  -1    3.40    7.10
  12   7  -1   -4.30    5.30
 -12   7   1    2.90    9.30
 -12   7   1   12.80    7.50
 -12   7   1   -4.00    8.30
 -12   7   1    1.90    8.90
  12   7  -1   20.40   21.20
 -12   7   1    4.60    9.70
  11  -7  -1   46.90   14.10
  11  -7  -1   27.80    8.60
  11  -7  -1   52.39   11.20
 -11  -7   1   46.40   16.20
  11  -7  -1   79.29   13.80
 -11  -7   1   33.30    9.10
 -11  -7   1   53.49   10.10
  11  -7  -1   49.00   17.50
 -11  -7   1   66.49   17.70
 -11  -7   1   49.00   10.30
  11  -7  -1   33.10    9.00
 -11   7   1   54.49   11.40
  11   7  -1   44.90   15.90
  11   7  -1   45.40   17.30
  11   7  -1   41.00    8.70
 -11   7   1   41.70    8.90
  11   7  -1   38.50   10.80
 -11   7   1   46.10   11.30
  11   7  -1   42.60   10.00
 -11   7   1   42.80    9.50
 -11   7   1   47.90   17.50
  11   7  -1   28.00    7.20
  10  -7  -1   19.50    7.20
 -10  -7   1   19.00   10.00
 -10  -7   1    3.50    5.30
 -10  -7   1    2.60    7.70
 -10  -7   1   10.10    6.80
  10  -7  -1   21.70    9.40
  10  -7  -1   16.70   12.30
  10  -7  -1   17.10   18.00
  10  -7  -1    8.60    7.00
  10  -7  -1    8.00    7.50
 -10  -7   1   19.80   10.20
  10   7  -1   17.40   11.90
  10   7  -1    7.00    6.00
  10   7  -1   12.10    6.10
 -10   7   1    9.00    9.70
  10   7  -1    9.00    6.10
 -10   7   1    4.20    4.90
 -10   7   1   15.80    6.70
 -10   7   1   21.20    9.50
  10   7  -1   23.90    8.70
 -10   7   1    3.60    8.70
  10   7  -1   31.90   19.70
   9  -7  -1  131.79   13.00
  -9  -7   1  153.68   20.20
  -9  -7   1  124.99   12.40
  -9  -7   1  118.99   12.20
  -9  -7   1  157.48   22.00
   9  -7  -1  148.79   20.50
   9  -7  -1  150.88   15.30
   9  -7  -1  118.29   13.50
   9  -7  -1  124.89   10.70
   9  -7  -1  125.19   14.20
  -9  -7   1  121.49   12.40
  -9   7   1  131.49   14.30
   9   7  -1  136.19   14.30
  -9   7   1  117.39   15.10
  -9   7   1  142.99   14.60
  -9   7   1  119.99   17.60
   9   7  -1  123.79   11.10
  -9   7   1  128.89   11.50
   9   7  -1  113.69   23.30
   9   7  -1  119.19   14.60
   9   7  -1  122.99   21.00
   9   7  -1  112.89   11.00
  -8  -7   1   11.00    6.20
   8  -7  -1   28.50    7.40
  -8  -7   1   16.60    5.50
   8  -7  -1   18.50   10.90
   8  -7  -1   14.60    6.90
  -8  -7   1   27.00    6.70
  -8  -7   1   24.50   12.10
   8  -7  -1   10.40    8.00
   8  -7  -1   14.60    5.80
  -8  -7   1   20.30    9.30
   8  -7  -1   13.70    6.00
   8   7  -1    2.20    6.90
   8   7  -1   21.20   10.60
  -8   7   1   29.00    8.30
  -8   7   1    9.90    6.40
   8   7  -1   19.90    7.20
   8   7  -1   30.50   13.00
   8   7  -1   12.90    7.70
   8   7  -1   25.30    7.10
  -8   7   1   10.10   11.40
  -8   7   1   24.20    8.10
  -8   7   1   10.00    5.30
   8   7  -1   11.30    4.30
   7  -7  -1  298.37   22.70
   7  -7  -1  287.77   18.30
   7  -7  -1  280.37   17.00
  -7  -7   1  311.57   19.30
   7  -7  -1  262.47   14.90
  -7  -7   1  292.37   17.70
  -7  -7   1  307.27   22.20
  -7  -7   1  278.47   21.50
  -7  -7   1  282.47   15.10
   7  -7  -1  295.77   18.40
   7  -7  -1  282.17   17.70
  -7   7   1  310.17   27.20
   7   7  -1  299.67   17.90
   7   7  -1  257.67   15.80
   7   7  -1  299.77   18.00
   7   7  -1  291.27   28.60
  -7   7   1  281.17   14.40
  -7   7   1  299.77   23.20
   7   7  -1  293.67   16.20
  -7   7   1  277.37   17.10
   7   7  -1  252.97   20.00
   7   7  -1  282.57   16.90
  -6  -7   1   59.19   12.80
   6  -7  -1   59.29   10.10
  -6  -7   1   54.19    9.00
   6  -7  -1   75.29    9.60
   6  -7  -1   57.59    9.50
  -6  -7   1   64.39    7.00
   6  -7  -1   60.89   11.30
  -6  -7   1   62.59   11.90
   6  -7  -1   70.09   12.50
   6  -7  -1   63.09    9.20
  -6   7   1   54.19   12.50
   6   7  -1   64.79    8.50
   6   7  -1   68.39    8.60
  -6   7   1   65.59    8.90
  -6   7   1   60.29    5.90
   6   7  -1   62.69    8.30
  -6   7   1   54.69    9.40
   6   7  -1   57.59   15.70
  -6   7   1   60.59    8.20
   6   7  -1   72.09   13.00
   6   7  -1   65.09    7.40
  -5  -7   1  171.58   11.20
   5  -7  -1  206.88   17.60
   5  -7  -1  161.98   11.80
  -5  -7   1  181.38   13.10
   5  -7  -1  185.98   15.70
  -5  -7   1  193.48   15.60
   5  -7  -1  175.38   10.30
   5  -7  -1  172.48   13.70
   5  -7  -1  203.88   12.80
  -5  -7   1  209.78   20.00
  -5  -7   1  178.48   11.80
  -5   7   1  201.58   13.30
   5   7  -1  177.98   18.70
   5   7  -1  182.18   13.10
  -5   7   1  185.28   10.10
  -5   7   1  153.08   12.90
  -5   7   1  183.48   12.90
   5   7  -1  175.68   12.00
   5   7  -1  196.78   13.30
   5   7  -1  182.98   15.50
   5   7  -1  198.18   11.80
  -5   7   1  206.28   17.10
   4  -7  -1  800.82   30.90
   4  -7  -1  810.12   28.10
  -4  -7   1  828.02   35.70
  -4  -7   1  834.42   31.40
   4  -7  -1  874.11   32.80
  -4  -7   1  810.02   29.10
   4  -7  -1  848.32   36.00
   4  -7  -1  779.22   31.20
   4  -7  -1  811.02   31.90
  -4  -7   1  827.32   32.60
   4   7  -1  809.72   36.40
  -4   7   1  840.02   31.60
  -4   7   1  834.92   31.20
  -4   7   1  857.41   38.50
   4   7  -1  826.22   29.00
   4   7  -1  898.31   35.50
  -4   7   1  817.42   31.00
  -4   7   1  867.51   28.70
   4   7  -1  793.42   32.80
   4   7  -1  845.32   31.60
   4   7  -1  771.72   30.20
  -3  -7   1 1675.93   55.49
   3  -7  -1 1831.62   57.79
  -3  -7   1 1698.93   65.19
   3  -7  -1 1725.93   55.79
  -3  -7   1 1650.53   55.89
  -3  -7   1 1699.33   55.39
   3  -7  -1 1710.63   56.99
  -3  -7   1 1754.62   53.89
  -3  -7   1 1744.73   55.59
   3  -7  -1 1811.62   61.19
   3   7  -1 1747.53   55.99
  -3   7   1 1708.33   56.79
  -3   7   1 1584.54   56.59
   3   7  -1 1714.43   55.79
   3   7  -1 1675.53   61.39
  -3   7   1 1769.72   61.69
   3   7  -1 1751.42   53.59
   3   7  -1 1594.44   55.69
  -3   7   1 1487.45   62.19
  -3   7   1 1795.12   56.49
  -3   7   1 1771.32   55.89
   2  -7  -1  156.88   13.20
   2  -7  -1  147.49    9.60
  -2  -7   1  139.19   10.00
   2  -7  -1  166.48   13.00
   2  -7  -1  150.58   11.90
  -2  -7   1  146.99   10.50
  -2  -7   1  162.38    9.90
   2  -7  -1  155.38   10.50
  -2  -7   1  160.98    9.00
  -2  -7   1  164.98   17.50
  -2  -7   1  153.18   10.40
  -2   7   1  152.78    7.50
   2   7  -1  169.18    8.60
   2   7  -1  149.99   15.30
  -2   7   1  164.78   10.80
   2   7  -1  168.58   10.00
   2   7  -1  148.39   10.50
   2   7  -1  148.69   10.70
  -2   7   1  185.88   12.60
  -2   7   1  164.28   13.70
  -2   7   1  149.59    9.60
   1  -7  -1  119.09   10.30
   1  -7  -1  134.59   12.20
  -1  -7   1  131.39    9.40
  -1  -7   1  118.79    8.30
   1  -7  -1  124.69    9.80
   1  -7  -1  106.89    8.90
  -1  -7   1  116.49    9.40
  -1  -7   1  124.69    9.10
  -1  -7   1  121.29    7.90
  -1  -7   1  121.59   15.80
   1  -7  -1  120.79   14.30
  -1   7   1  114.39   10.60
  -1   7   1  112.89    5.90
   1   7  -1  113.89    7.30
   1   7  -1  121.59   11.80
   1   7  -1  108.79    8.00
  -1   7   1  115.39    8.20
  -1   7   1  138.39   15.80
   1   7  -1  113.19    8.30
  -1   7   1  118.09    8.20
   1   7  -1  105.69   12.60
  -1   7   1  123.79   10.90
   0  -7  -1   74.09    4.80
   0  -7   1   79.19    6.50
   0  -7   1   71.19    6.80
   0  -7   1   75.39    6.50
   0  -7  -1   56.19    7.10
   0  -7  -1   73.69    7.80
   0  -7  -1   65.19    8.70
   0  -7  -1   66.49   11.20
   0  -7   1   60.69    8.40
   0  -7   1   63.29   10.30
   0  -7  -1   64.09    7.30
   0   7  -1   57.39    6.70
   0   7  -1   71.59    8.60
   0   7   1   64.39    8.90
   0   7  -1   72.49   12.50
   0   7   1   74.89    7.30
   0   7   1   70.29    4.60
   0   7   1   75.19    6.50
   0   7  -1   63.69    5.60
   0   7   1   77.59   10.30
   0   7  -1   71.29    7.20
   0   7  -1   73.29    7.40
  -1  -7  -1  569.14   19.90
   1  -7   1  571.44   21.60
  -1  -7  -1  537.75   25.80
  -1  -7  -1  546.95   24.90
   1  -7   1  533.55   21.70
   1  -7   1  562.34   24.40
  -1  -7  -1  562.04   21.70
   1  -7   1  541.35   23.80
  -1  -7  -1  570.04   21.80
  -1  -7  -1  549.35   22.00
  -1   7  -1  553.54   21.60
  -1   7  -1  545.15   23.50
  -1   7  -1  601.34   24.20
   1   7   1  581.74   22.10
   1   7   1  587.44   19.20
   1   7   1  545.65   25.40
   1   7   1  579.74   21.70
  -1   7  -1  556.74   23.70
  -1   7  -1  546.55   21.50
   1   7   1  546.75   21.70
  -2  -7  -1  234.68   13.80
  -2  -7  -1  275.67   13.90
  -2  -7  -1  292.57   14.60
  -2  -7  -1  264.57   13.50
  -2  -7  -1  292.87   25.90
   2  -7   1  283.87   16.20
  -2  -7  -1  259.27   16.80
   2  -7   1  271.07   15.30
   2  -7   1  285.47   14.50
   2  -7   1  288.67   14.50
   2  -7   1  296.77   16.10
  -2   7  -1  288.97   14.50
   2   7   1  300.37   14.80
  -2   7  -1  301.17   15.40
   2   7   1  313.27   14.80
  -2   7  -1  281.77   13.30
  -2   7  -1  279.77   16.60
   2   7   1  319.37   21.90
  -2   7  -1  302.87   15.50
  -2   7  -1  261.07   19.70
   2   7   1  296.07   11.80
   2   7   1  288.57   13.60
   3  -7   1  245.18   16.40
  -3  -7  -1  230.68   11.90
   3  -7   1  243.58   13.10
  -3  -7  -1  248.68   11.30
  -3  -7  -1  234.68   13.00
  -3  -7  -1  238.48   16.80
   3  -7   1  254.97   13.20
  -3  -7  -1  243.28   21.10
   3  -7   1  248.68   16.30
   3   7   1  256.57   13.30
   3   7   1  223.98   13.30
  -3   7  -1  252.17   17.00
  -3   7  -1  262.27   12.10
  -3   7  -1  244.38   15.70
  -3   7  -1  247.18   14.50
   3   7   1  253.67   21.30
  -3   7  -1  251.17   13.20
   3   7   1  235.58   12.90
   3   7   1  251.17   11.30
  -3   7  -1  241.88   15.30
  -4  -7  -1  105.29   10.00
  -4  -7  -1   88.59   11.20
   4  -7   1   85.49   12.30
  -4  -7  -1   91.89   14.10
   4  -7   1   90.19   12.70
  -4  -7  -1   80.49    7.50
  -4  -7  -1   96.99    9.40
   4  -7   1   91.99    9.40
   4  -7   1   91.39    8.60
   4  -7   1  102.89    8.70
   4  -7   1   79.99    7.50
   4   7   1   98.79   12.60
   4   7   1  109.09    7.40
  -4   7  -1   96.79    9.40
   4   7   1   83.89    7.60
   4   7   1  110.89   15.70
  -4   7  -1   95.79    9.60
  -4   7  -1   96.09    7.10
  -4   7  -1   89.49   14.00
  -4   7  -1   96.99   11.80
   4   7   1   96.79   13.00
   4   7   1   95.49    9.70
  -5  -7  -1   93.59    8.40
  -5  -7  -1  101.99    9.10
   5  -7   1  100.69    9.70
   5  -7   1  104.19    8.60
  -5  -7  -1  104.69   15.00
   5  -7   1   91.09   14.70
   5  -7   1  109.09   11.30
  -5  -7  -1   99.69   10.30
   5  -7   1   89.09    8.50
  -5  -7  -1  104.89   16.20
   5   7   1   98.79   10.20
  -5   7  -1   86.39    8.70
   5   7   1  107.09    9.00
   5   7   1  100.79    9.30
   5   7   1   92.09    7.70
  -5   7  -1   84.09   13.50
  -5   7  -1  107.59    9.20
   5   7   1   98.19   16.20
   5   7   1   93.99   11.90
  -5   7  -1   92.99    8.20
  -5   7  -1   91.49   10.10
  -6  -7  -1  501.85   21.00
  -6  -7  -1  455.55   22.00
   6  -7   1  482.85   20.90
   6  -7   1  480.25   28.90
   6  -7   1  510.85   23.90
   6  -7   1  491.45   23.10
   6  -7   1  494.95   22.20
  -6  -7  -1  498.35   30.40
   6  -7   1  452.75   22.20
   6  -7   1  479.75   21.10
  -6  -7  -1  510.65   29.10
  -6  -7  -1  498.15   23.50
  -6   7  -1  490.25   22.50
  -6   7  -1  475.95   22.90
   6   7   1  502.95   24.80
   6   7   1  462.15   28.80
   6   7   1  454.05   19.70
   6   7   1  467.75   28.70
  -6   7  -1  507.05   20.60
  -6   7  -1  510.75   30.00
   6   7   1  508.25   21.50
   6   7   1  470.15   23.30
  -6   7  -1  477.15   23.80
   6   7   1  449.36   18.90
  -7  -7  -1   94.09   16.30
  -7  -7  -1  106.19   11.70
   7  -7   1   82.99    9.60
   7  -7   1   86.89   12.30
   7  -7   1   80.89   13.40
  -7  -7  -1  100.89   11.60
   7  -7   1   69.39    8.60
  -7  -7  -1   66.49    7.60
   7  -7   1   91.89   11.80
   7  -7   1   82.69   15.10
  -7  -7  -1   85.99   16.50
   7  -7   1   70.39   11.40
   7   7   1   79.39   14.20
   7   7   1   70.49    6.90
   7   7   1   74.09    9.40
  -7   7  -1   78.99   13.60
  -7   7  -1   77.09   10.60
   7   7   1   82.49    8.60
   7   7   1   73.59   18.10
   7   7   1   72.79    8.20
   7   7   1   76.29    9.80
  -7   7  -1   88.19   11.40
  -7   7  -1   75.19   10.30
  -7   7  -1   68.89    8.70
   8  -7   1  179.98   15.50
   8  -7   1  186.68   14.00
   8  -7   1  184.88   14.60
  -8  -7  -1  209.68   20.40
  -8  -7  -1  192.18   20.20
   8  -7   1  184.08   15.20
  -8  -7  -1  213.38   14.10
   8  -7   1  195.98   16.40
  -8  -7  -1  225.98   15.40
  -8  -7  -1  195.08   15.50
   8  -7   1  202.98   25.00
   8   7   1  191.28   14.30
  -8   7  -1  177.38   12.30
   8   7   1  186.38   29.00
  -8   7  -1  183.88   19.90
   8   7   1  188.48   14.30
  -8   7  -1  217.78   16.00
  -8   7  -1  202.88   15.50
   8   7   1  205.68   15.90
   8   7   1  176.18   20.00
   8   7   1  167.08   12.30
  -8   7  -1  197.38   14.90
   8   7   1  172.08   11.00
  -9  -7  -1    2.60    5.10
  -9  -7  -1   11.30   12.50
  -9  -7  -1    1.80    9.40
   9  -7   1   -1.50    8.10
   9  -7   1    7.10    6.40
   9  -7   1   19.20    8.40
  -9  -7  -1   -3.70    6.40
   9  -7   1    3.50    5.60
   9  -7   1   10.70    6.40
   9  -7   1   -1.10   11.10
  -9  -7  -1    7.50    6.40
  -9   7  -1    3.70    5.80
   9   7   1    7.80    5.90
   9   7   1   -0.20    4.30
  -9   7  -1  -13.40    4.10
  -9   7  -1   -3.40   10.90
   9   7   1   -8.30    9.60
   9   7   1    6.80    5.20
  -9   7  -1    7.30    4.30
   9   7   1   -7.40   11.70
  -9   7  -1    8.40    7.30
   9   7   1   -6.00    6.40
   9   7   1    2.10    4.20
 -10  -7  -1  130.29   22.70
  10  -7   1  132.19   15.60
 -10  -7  -1  109.29   12.50
  10  -7   1   86.39   12.60
 -10  -7  -1  113.29   13.40
  10  -7   1   86.39   12.20
 -10  -7  -1  122.89   19.70
  10  -7   1  106.19   13.60
 -10  -7  -1   87.09   12.10
  10  -7   1  121.49   23.40
  10  -7   1  125.29   11.90
  10   7   1  123.69   14.10
 -10   7  -1  111.39   13.70
  10   7   1   90.99   12.90
 -10   7  -1  107.49   19.60
 -10   7  -1  114.79   13.10
  10   7   1   91.79   22.80
  10   7   1   90.99    9.10
 -10   7  -1  143.89   16.20
 -10   7  -1   98.59   10.40
  10   7   1  117.59   14.80
  10   7   1  105.69   23.90
 -11  -7  -1  170.98   16.40
  11  -7   1  190.18   30.40
 -11  -7  -1  178.28   16.20
 -11  -7  -1  204.28   17.30
  11  -7   1  205.88   15.90
 -11  -7  -1  203.48   26.60
  11  -7   1  174.88   18.10
  11  -7   1  207.18   19.30
  11  -7   1  218.58   17.10
 -11  -7  -1  217.78   27.20
  11  -7   1  189.48   17.50
 -11   7  -1  188.18   16.70
  11   7   1  201.68   13.10
 -11   7  -1  194.98   16.70
 -11   7  -1  221.38   18.80
  11   7   1  226.68   18.30
  11   7   1  215.58   33.70
 -11   7  -1  189.98   16.30
 -11   7  -1  173.58   23.40
  11   7   1  196.58   17.80
  11   7   1  219.58   19.50
  11   7   1  173.58   28.90
  12  -7   1   10.40    5.80
  12  -7   1   24.20   13.80
 -12  -7  -1   15.80    9.30
  12  -7   1   34.00   11.00
  12  -7   1   46.70   22.80
 -12  -7  -1   13.80    9.40
 -12  -7  -1   16.80    7.00
 -12  -7  -1   21.50   12.20
 -12  -7  -1   27.50   14.90
  12  -7   1   25.50    7.90
  12  -7   1   17.70   10.60
  12   7   1    3.10   20.60
 -12   7  -1    7.50    9.00
 -12   7  -1   20.60    8.70
  12   7   1   22.00   10.10
  12   7   1   22.00    6.60
  12   7   1    6.60    9.40
  12   7   1    6.50    8.40
 -12   7  -1   20.60   19.20
 -12   7  -1   17.00   10.20
  12   7   1    5.90   20.90
 -12   7  -1   24.70    9.50
  13  -7   1   28.50   13.80
 -13  -7  -1   26.90   10.00
 -13  -7  -1    4.30    8.80
  13  -7   1   -5.40   22.50
  13  -7   1   -5.20    9.80
 -13  -7  -1   17.50    9.60
 -13  -7  -1    8.70   10.50
 -13   7  -1    6.70    9.80
 -13   7  -1   11.60    8.40
 -13   7  -1   -3.20    8.00
  13   7   1   -1.10   19.60
  13   7   1   21.20   10.90
  13   7   1   13.00    7.20
  13   7   1    4.90    8.00
 -13   7  -1   15.40    7.60
  13   7   1   12.10   21.20
  13   7   1    8.60    7.60
 -13   7  -1   23.00   13.60
 -14  -7  -1   14.50    6.90
 -14  -7  -1   34.60   17.40
  14  -7   1   22.90    8.20
 -14  -7  -1   21.10   11.80
 -14  -7  -1   40.00   11.00
  14  -7   1   43.20   26.90
  14  -7   1   16.50    8.20
  14  -7   1   32.20   14.80
  14  -7   1   36.60   12.60
 -14   7  -1   41.70   14.10
  14   7   1   45.70   24.30
 -14   7  -1   18.60    8.10
 -14   7  -1   36.80    9.70
  14   7   1   25.30   11.30
  14   7   1   37.90   10.10
 -14   7  -1   31.30    9.90
  14   7   1   23.40    7.10
  14   7   1   12.00   23.30
  15  -7   1  -18.90   12.00
  15  -7   1   -2.20    9.50
 -15  -7  -1   -2.80    5.90
  15  -7   1   -1.60   12.60
 -15  -7  -1    3.60    8.30
 -15  -7  -1    9.30   12.90
  15  -7   1   -4.60    8.30
 -15  -7  -1   -0.70    8.20
  15  -7   1  -48.30   30.00
  15   7   1   -6.80    8.70
  15   7   1   -5.60    6.40
  15   7   1  -16.80   22.50
 -15   7  -1   -0.20    9.60
 -15   7  -1   -3.00   10.70
  15   7   1   -4.10   10.20
 -15   7  -1   -2.80    9.20
  15   7   1   21.20   17.50
 -15   7  -1   15.20    8.80
  15   7   1   -5.70    6.70
 -15   7  -1   33.40   13.20
 -15  -8   1    3.20   11.80
  15  -8  -1    2.40   13.40
 -15  -8   1   -6.30    9.60
  15  -8  -1   -0.60    8.20
  15  -8  -1    1.80    6.30
  15  -8  -1  -16.10   46.80
 -15  -8   1   14.10   14.80
 -15  -8   1  -11.00    6.90
  15   8  -1    0.20    6.10
 -15   8   1    2.20    5.80
 -15   8   1    1.40    7.90
  15   8  -1   -0.50   18.30
  15   8  -1  -10.70   21.90
  15   8  -1    3.20    7.00
  15   8  -1    5.60    7.10
 -15   8   1    2.80    7.80
  15   8  -1   14.90   12.10
  14  -8  -1   62.19   14.10
 -14  -8   1   67.99   13.10
 -14  -8   1   68.99   20.20
  14  -8  -1   95.69   31.80
  14  -8  -1   72.89   12.80
  14  -8  -1   64.99   13.30
  14  -8  -1   32.60   14.20
 -14  -8   1   45.40   12.30
  14   8  -1   59.69   10.00
 -14   8   1   72.79   15.30
 -14   8   1   79.59   11.30
 -14   8   1   65.59   15.50
  14   8  -1   53.89   13.80
 -14   8   1   51.49   10.30
 -14   8   1   90.79   21.50
  14   8  -1   63.19   26.20
  14   8  -1   63.79   12.10
  14   8  -1   64.39   28.40
 -13  -8   1   27.60   11.10
 -13  -8   1   29.60   10.00
  13  -8  -1   37.40   13.20
  13  -8  -1   28.70   10.60
  13  -8  -1   26.70   19.50
 -13  -8   1   26.50   16.10
  13  -8  -1   41.50   13.70
 -13  -8   1   19.70    9.90
 -13   8   1   18.40    8.90
  13   8  -1   44.60   19.10
 -13   8   1   27.80   13.20
  13   8  -1   53.69   10.10
  13   8  -1   23.90    7.80
  13   8  -1   28.50   24.70
  13   8  -1   18.00   10.30
  13   8  -1    6.40    8.30
 -13   8   1   27.10   12.20
 -13   8   1   29.00   11.60
  13   8  -1   39.00   13.10
 -13   8   1   34.80   10.60
  12  -8  -1   82.09   12.70
  12  -8  -1   65.19    9.90
 -12  -8   1   84.99   12.40
  12  -8  -1   98.89   23.30
 -12  -8   1  105.09   16.20
 -12  -8   1   93.39   18.00
 -12  -8   1  126.99   19.70
  12  -8  -1  113.19   15.70
  12  -8  -1  111.39   16.00
  12  -8  -1  108.09   15.90
 -12  -8   1   74.59   13.90
 -12   8   1   97.69   14.20
  12   8  -1  115.29   26.50
 -12   8   1   66.39   14.10
 -12   8   1   92.59   13.20
 -12   8   1  102.59   36.00
  12   8  -1   91.19   15.20
  12   8  -1   90.69   11.70
  12   8  -1   92.79   11.20
  12   8  -1  121.89   29.40
  12   8  -1   50.89   10.70
  12   8  -1  148.39   15.40
 -11  -8   1   17.60    7.30
 -11  -8   1   11.20    9.10
 -11  -8   1   20.60    8.30
  11  -8  -1   27.60    9.00
  11  -8  -1   21.30    7.10
  11  -8  -1   22.20   13.70
  11  -8  -1   48.60   21.70
  11  -8  -1   18.20    9.10
 -11  -8   1   20.90   14.40
  11  -8  -1   11.90    7.40
 -11  -8   1   13.60   15.00
  11   8  -1   10.10    8.40
 -11   8   1   -0.80    9.80
 -11   8   1   22.80   10.50
  11   8  -1   16.90   18.30
  11   8  -1   47.70   15.90
 -11   8   1   16.60    7.20
  11   8  -1   28.80   10.70
 -11   8   1   10.90   11.00
  11   8  -1   11.20    7.90
  11   8  -1   20.60    7.80
  11   8  -1   16.50    6.80
 -11   8   1   28.80    8.50
 -10  -8   1  127.19   14.20
  10  -8  -1  143.09   14.20
 -10  -8   1  156.28   21.80
  10  -8  -1  163.98   20.80
  10  -8  -1  129.89   15.60
 -10  -8   1  143.39   16.30
  10  -8  -1  142.39   13.30
  10  -8  -1  145.29   16.30
  10  -8  -1  127.49   23.20
 -10  -8   1  128.49   16.00
 -10  -8   1  130.79   19.90
  10   8  -1  127.89   19.30
  10   8  -1  143.49   13.00
 -10   8   1  132.29   16.50
  10   8  -1  127.39   12.90
 -10   8   1  138.19   15.30
  10   8  -1  107.69   13.00
  10   8  -1  146.69   12.50
 -10   8   1  130.19   15.50
 -10   8   1  144.49   12.40
 -10   8   1  136.99   19.80
  10   8  -1  158.08   27.00
  10   8  -1  157.08   16.50
  -9  -8   1   34.70   14.20
  -9  -8   1   32.70    9.90
   9  -8  -1   25.20    7.10
   9  -8  -1   27.40    8.80
   9  -8  -1   32.10    8.80
   9  -8  -1   15.70   12.80
   9  -8  -1   28.90    8.20
   9  -8  -1   36.20   13.50
  -9  -8   1   48.40   14.90
  -9  -8   1   35.60    6.80
   9  -8  -1   18.90    6.30
  -9  -8   1   28.60    7.70
  -9   8   1   36.60   10.60
   9   8  -1   22.80   20.40
   9   8  -1   29.50    8.10
   9   8  -1   31.90    9.20
  -9   8   1   30.90   15.00
  -9   8   1   25.20    8.00
   9   8  -1   30.30    8.40
  -9   8   1   26.70    6.90
   9   8  -1   29.00    6.90
   9   8  -1   17.70    8.20
   9   8  -1   45.60   16.70
  -9   8   1   47.60   10.50
   8  -8  -1  285.27   18.60
  -8  -8   1  270.47   18.50
  -8  -8   1  324.07   24.70
   8  -8  -1  245.48   18.10
   8  -8  -1  317.47   27.20
   8  -8  -1  256.47   15.40
   8  -8  -1  291.67   22.00
   8  -8  -1  242.78   18.70
   8  -8  -1  252.87   17.20
  -8  -8   1  277.27   16.50
  -8  -8   1  248.38   16.70
  -8  -8   1  258.17   22.70
   8   8  -1  284.57   17.90
  -8   8   1  261.07   14.70
   8   8  -1  305.07   19.10
   8   8  -1  283.27   17.10
  -8   8   1  277.07   24.10
  -8   8   1  281.77   18.50
  -8   8   1  284.67   17.50
   8   8  -1  258.37   15.30
   8   8  -1  271.87   16.50
   8   8  -1  282.87   33.00
  -8   8   1  257.07   17.80
   8   8  -1  243.48   24.10
   7  -8  -1    2.60   10.60
  -7  -8   1   -2.10    9.60
  -7  -8   1   -1.40    5.00
   7  -8  -1   -4.70    5.20
  -7  -8   1    7.20    8.40
   7  -8  -1   -1.40    3.80
   7  -8  -1    8.20   10.30
  -7  -8   1   -1.50    3.80
   7  -8  -1   -5.50    9.80
  -7  -8   1   -7.20    5.20
   7  -8  -1    4.80    4.50
   7  -8  -1    1.30    6.20
   7   8  -1    9.30   16.40
   7   8  -1    3.90    5.30
   7   8  -1  -11.30    9.10
  -7   8   1   -1.00    4.30
  -7   8   1   -1.20    4.80
   7   8  -1    0.00    4.80
  -7   8   1   -5.00    5.40
   7   8  -1    4.10    5.90
  -7   8   1    1.30    6.50
   7   8  -1    5.50    5.50
  -6  -8   1  838.72   40.20
   6  -8  -1  810.82   32.70
   6  -8  -1  789.62   32.80
  -6  -8   1  780.62   32.50
  -6  -8   1  834.42   40.10
   6  -8  -1  788.92   32.40
   6  -8  -1  761.02   30.10
  -6  -8   1  806.22   30.70
   6  -8  -1  800.62   33.40
   6  -8  -1  826.72   39.50
  -6   8   1  811.32   32.80
   6   8  -1  821.02   33.00
  -6   8   1  811.82   32.90
   6   8  -1  765.82   36.30
   6   8  -1  787.22   39.20
  -6   8   1  803.82   28.80
  -6   8   1  766.22   39.20
  -6   8   1  837.12   34.00
   6   8  -1  770.42   31.20
   6   8  -1  889.41   31.30
   6   8  -1  803.22   33.10
   5  -8  -1  261.87   16.80
   5  -8  -1  298.47   21.30
  -5  -8   1  249.08   16.50
   5  -8  -1  270.47   16.40
  -5  -8   1  269.17   23.40
   5  -8  -1  255.87   13.10
  -5  -8   1  289.07   18.60
   5  -8  -1  278.47   17.10
  -5  -8   1  303.67   16.90
   5  -8  -1  261.97   16.30
  -5  -8   1  273.57   14.40
   5   8  -1  264.37   15.40
  -5   8   1  263.77   17.30
   5   8  -1  300.07   14.80
   5   8  -1  263.37   18.30
  -5   8   1  268.77   18.30
  -5   8   1  298.27   22.00
  -5   8   1  288.37   13.00
   5   8  -1  273.37   16.50
   5   8  -1  280.47   15.80
   5   8  -1  275.47   22.60
  -5   8   1  269.37   15.40
  -4  -8   1 1459.85   55.29
   4  -8  -1 1494.15   55.09
  -4  -8   1 1430.96   49.00
   4  -8  -1 1418.36   48.90
   4  -8  -1 1433.06   49.99
  -4  -8   1 1411.86   48.90
  -4  -8   1 1383.86   48.40
  -4  -8   1 1326.77   49.60
   4  -8  -1 1478.25   49.90
   4  -8  -1 1399.26   45.40
   4  -8  -1 1583.64   52.49
  -4  -8   1 1422.76   46.70
  -4   8   1 1444.66   49.70
   4   8  -1 1437.36   49.10
  -4   8   1 1420.56   49.10
   4   8  -1 1361.06   54.39
   4   8  -1 1375.86   48.10
   4   8  -1 1441.06   49.20
  -4   8   1 1394.96   49.20
  -4   8   1 1453.35   49.40
   4   8  -1 1489.35   46.90
  -4   8   1 1369.46   54.99
   3  -8  -1  172.08   11.90
   3  -8  -1  171.78   14.70
   3  -8  -1  150.58   12.30
  -3  -8   1  137.59   13.30
   3  -8  -1  175.18   12.70
  -3  -8   1  169.78   10.10
  -3  -8   1  132.99   11.10
  -3  -8   1  156.08   15.50
  -3  -8   1  159.88   11.80
  -3  -8   1  134.39   11.00
   3  -8  -1  147.89   13.80
  -3   8   1  151.08   13.30
   3   8  -1  168.58   11.90
   3   8  -1  160.98   11.90
  -3   8   1  165.48    8.50
  -3   8   1  179.78   15.80
   3   8  -1  143.49   11.80
  -3   8   1  162.08   11.00
   3   8  -1  152.08   21.00
  -3   8   1  167.38   11.90
  -3   8   1  159.48   13.60
  -2  -8   1 1452.65   50.09
   2  -8  -1 1491.85   51.89
  -2  -8   1 1507.95   50.39
  -2  -8   1 1528.35   61.09
  -2  -8   1 1506.85   50.39
   2  -8  -1 1500.15   50.19
   2  -8  -1 1621.64   52.49
  -2  -8   1 1452.35   50.49
   2  -8  -1 1558.64   54.89
   2  -8  -1 1511.35   50.29
  -2  -8   1 1515.85   48.20
  -2  -8   1 1441.96   50.69
  -2   8   1 1511.65   53.19
  -2   8   1 1472.05   55.39
  -2   8   1 1522.15   50.19
  -2   8   1 1566.14   48.80
   2   8  -1 1494.05   55.79
  -2   8   1 1623.94   50.79
   2   8  -1 1561.24   48.10
   2   8  -1 1497.05   55.49
   2   8  -1 1555.84   50.49
  -2   8   1 1565.64   56.89
   2   8  -1 1464.55   50.49
   1  -8  -1 1248.78   42.50
   1  -8  -1 1285.67   42.80
   1  -8  -1 1187.48   47.50
  -1  -8   1 1234.38   40.20
  -1  -8   1 1232.68   42.70
  -1  -8   1 1233.58   43.70
   1  -8  -1 1254.87   43.00
  -1  -8   1 1214.18   45.50
   1  -8  -1 1269.77   45.20
  -1  -8   1 1277.77   42.50
  -1  -8   1 1273.97   42.60
  -1   8   1 1183.68   46.70
   1   8  -1 1253.97   42.50
   1   8  -1 1267.97   43.80
  -1   8   1 1302.07   42.80
  -1   8   1 1272.87   45.40
  -1   8   1 1243.48   38.70
  -1   8   1 1255.67   42.50
  -1   8   1 1369.06   43.40
   1   8  -1 1249.47   42.90
   1   8  -1 1254.67   40.10
   1   8  -1 1273.77   47.10
   0  -8   1  409.96   21.00
   0  -8  -1  449.16   18.80
   0  -8   1  422.36   18.80
   0  -8  -1  450.55   24.30
   0  -8   1  455.95   19.20
   0  -8  -1  467.05   18.70
   0  -8  -1  470.85   23.80
   0  -8   1  447.66   20.30
   0  -8  -1  422.76   20.00
   0  -8   1  399.76   19.50
   0  -8  -1  418.66   18.50
   0   8  -1  477.45   20.20
   0   8   1  457.35   18.70
   0   8  -1  427.76   20.70
   0   8   1  421.16   18.80
   0   8   1  463.85   19.30
   0   8  -1  417.56   18.40
   0   8   1  442.26   15.60
   0   8  -1  435.36   22.80
   0   8  -1  438.36   16.80
   0   8  -1  418.56   19.70
   0   8   1  388.76   21.00
   0   8   1  460.15   23.80
  -1  -8  -1  656.33   22.50
   1  -8   1  637.54   25.00
   1  -8   1  665.83   25.10
  -1  -8  -1  673.93   25.90
   1  -8   1  649.34   26.40
  -1  -8  -1  627.04   25.40
  -1  -8  -1  661.53   25.60
  -1  -8  -1  656.63   30.50
   1  -8   1  641.24   27.60
  -1   8  -1  692.33   27.30
   1   8   1  668.73   25.40
   1   8   1  649.74   25.10
  -1   8  -1  634.24   27.20
   1   8   1  654.03   22.20
   1   8   1  665.33   30.80
   1   8   1  708.13   25.30
  -1   8  -1  640.44   25.30
  -1   8  -1  664.23   23.10
  -1   8  -1  563.14   33.60
  -2  -8  -1  816.72   31.00
   2  -8   1  867.21   34.10
   2  -8   1  855.11   32.60
  -2  -8  -1  796.62   30.30
   2  -8   1  860.21   31.50
  -2  -8  -1  797.22   37.30
   2  -8   1  834.02   31.20
  -2  -8  -1  838.72   28.60
   2  -8   1  810.22   31.70
   2   8   1  846.42   37.30
   2   8   1  859.91   31.50
  -2   8  -1  830.92   29.50
  -2   8  -1  856.01   31.50
   2   8   1  875.61   28.30
   2   8   1  889.91   33.80
  -2   8  -1  847.02   31.90
  -2   8  -1  850.01   34.50
  -2   8  -1  865.11   32.50
   2   8   1  881.81   32.10
  -2   8  -1  893.71   32.50
  -3  -8  -1  565.14   23.60
   3  -8   1  535.15   26.00
  -3  -8  -1  560.74   23.20
  -3  -8  -1  540.35   26.10
  -3  -8  -1  553.94   30.30
  -3  -8  -1  526.05   21.70
  -3  -8  -1  570.54   21.00
   3  -8   1  579.84   26.10
   3  -8   1  530.35   22.70
   3  -8   1  534.55   22.80
   3  -8   1  574.54   23.60
  -3   8  -1  560.04   27.00
  -3   8  -1  538.45   23.10
  -3   8  -1  561.54   23.60
   3   8   1  579.04   24.00
  -3   8  -1  521.05   21.10
   3   8   1  570.44   30.60
   3   8   1  539.85   21.60
  -3   8  -1  592.44   24.50
  -3   8  -1  568.14   23.80
   3   8   1  562.84   20.50
  -4  -8  -1   56.69   11.30
   4  -8   1   55.59    9.10
  -4  -8  -1   75.29    8.00
  -4  -8  -1   63.29   11.80
   4  -8   1   73.59    7.30
   4  -8   1   62.29    7.30
   4  -8   1   56.29   11.10
  -4  -8  -1   61.59    7.00
   4  -8   1   60.49    8.30
[truncated: 5,116,832 more chars]
